# Supplementary material for: Differential regulation of the proteome and phosphoproteome along the dorso-ventral axis of the early Drosophila embryo
Source: eLife. 2024 Sep 2;13:e99263. doi: 10.7554/eLife.99263 (PMC11466282; doi:10.7554/eLife.99263)
Supplement: Supplementary file 2. — p values are presented as -log10(p-value). [file elife-99263-supp2.xlsx]

## Sheet: Proteome figures statistics
			unpaired t-test pairwise comparisons
Protein Name	ANOVA -log10 p-value	ANOVA q-value	D vs. WT		L vs. WT		Vtl vs. WT		Vsp vs. WT
			-log10 p-value	log2 FC	-log10 p-value	log2 FC	-log10 p-value	log2 FC	-log10 p-value	log2 FC
Snail	1.43809	0.0746225	NaN		NA		0.489849	1.52471	1.72391	2.95213
Twist	3.58908	0.00305641	NaN		NA		1.2517	2.42222	4.35842	3.86699
Mrd49	9.19046	0	3.69264	-5.43544	2.63305	-4.79902	1.08365	1.00533	2.75137	1.79892
Traf4	1.15351	0.119015	1.47034	-2.03454	1.03484	-0.789244	0.167999	-0.274027	0.111192	-0.243488
CG4500	7.67153	0	2.54966	-4.07679	4.85224	-3.92825	0.65134	0.633802	2.76892	2.05815
WntD	0	1	NaN		NaN	0.352745	NaN	0.465931	NaN	0.551749
Sog	4.30182	0.00102857	2.92657	-4.65891	1.18037	1.35837	1.1534	-1.00212	0.546003	-1.02881
Doc1	2.46174	0.022003	2.46172	2.07285	NaN		NaN		NaN
Zen	0.682183	0.269657	0.21647	0.534124	NaN		0.0858143	-0.247053	0.855527	-2.3186
Dtg	6.86221	0	1.50641	-1.81064	1.72682	-3.68214	1.50641	-1.81064	1.70791	-0.85786
Net	3.56062	0.00738182	2.95018	0.951207	NaN	-1.43158	NaN	0.591469	0.00687232	0.003479
Egr	8.32408	0	5.53284	3.10571	1.51403	-2.14323	0.0342375	0.0294374	2.07029	-1.76557
Spn27A	6.45407	0	0.353659	0.248937	0.250711	0.248808	0.177037	-0.211761	2.66029	-5.39125
Toll	14.8712	0	0.470094	0.230118	4.88692	-6.1572	0.171248	0.0714696	0.223428	-0.0597579
Cactus	7.07511	0	2.26979	0.7848	1.292	0.658466	1.78497	0.532665	2.61613	-1.48396
D is Dorsalised (gd9)
L is Lateralised (tlrm9/tlrm10)
Vtl is Ventralised tl10B/def
Vsp is Ventralised spn27Aex/def
WT is wildtype w1118

## Sheet: Phosphoprot figures statistic
			pairwise, unpaired t-test comparisons
Phosphosite	ANOVA -log10 p-value	ANOVA q-value	D vs. WT		L vs. WT		Vtl vs. WT		Vsp vs. WT
			-log10 p-value	log2 FC	-log10 p-value	log2 FC	-log10 p-value	log2 FC	-log10 p-value	log2 FC
Toll-S871	2.6	0.04	0.310298	-0.172661	1.28376	1.10261	1.87079	0.586537	2.67495	0.453898
Cact-S463	1.82727	0.0878594	NaN		0.304725	0.412403	0.693127	0.926105	1.55915	1.48648
Cact-S467	NaN	1	NaN		NaN		NaN		NaN
Cact-S468	1.68163	0.104803	1.11862	0.750499	0.225442	-0.166213	0.126146	0.0977184	0.279731	0.213353
Sqh-T21	NaN	NaN	NaN		NaN		NaN		NaN
Sqh-S22	0.984169	0.237947	0.0894876	0.039234	2.42047	-0.269428	0.559192	-0.202854	1.53942	-0.212664
Cofilin-S3	1.48412	0.128514	0.505566	-0.528484	0.827178	-0.778592	1.22562	-1.11503	0.98446	-0.924358
D is Dorsalised (gd9)
L is Lateralised (tlrm9/tlrm10)
Vtl is Ventralised tl10B/def
Vsp is Ventralised spn27Aex/def
WT is wildtype w1118
