# Supplementary material for: Differential regulation of the proteome and phosphoproteome along the dorso-ventral axis of the early Drosophila embryo
Source: eLife. 2024 Sep 2;13:e99263. doi: 10.7554/eLife.99263 (PMC11466282; doi:10.7554/eLife.99263)
Supplement: Supplementary file 3. — p values are presented as -log10(p-value). Empty cell in gene and protein name indicate the detected protein had not been given a gene and/or a protein name in the Uniprot database version used in this study. NaN indicates a protein that was not detected in a particular replicate. [file elife-99263-supp3.xlsx]

## Sheet: Description
Title	Protein Groups
Software	MaxQuant 1.5.3.8
FASTA File	Uniprot reference proteome
Genotypes	gd9, Tlrm9, spn27Aex, Tl10B, WTE, WTG
Replicates	3-6
Column Name	Description
gd9/gd9_01	Log2 Transformed LFQ intensities
gd9/gd9_02
gd9/gd9_03
gd9/gd9_04
gd9/gd9_05
gd9/gd9_06
Tlrm9/Tlrm10_01
Tlrm9/Tlrm10_02
Tlrm9/Tlrm10_03
spn27Aex/def_01
spn27Aex/def_02
spn27Aex/def_03
spn27Aex/def_04
spn27Aex/def_05
spn27Aex/def_06
Tl10B/def_01
Tl10B/def_02
Tl10B/def_03
w1118_01
w1118_02
w1118_03
Protein names
Gene names
id
ANOVA Significant	+' indicates 1W-ANOVA q value < 0.05
ANOVA significant (noWTE)
Gene ontology (biological process)	Uniprot Gene Ontology Annotations
Gene ontology (cellular component)
Gene ontology (molecular function)
Peptides
Unique peptides
Sequence coverage [%]
Mol. weight [kDa]
Q-value	Q-value for the identification of the protein group
Score	Andromeda Score for the protein group
Intensity
MS/MS Count
-Log ANOVA p value	One Way ANOVA Statistics, q-value is based on a permutation test (n=500)
ANOVA q-value
-Log p-value gd9/gd9_w1118	Pairwise comparisons of an unpaired two-sided t-test
log2FC gd9/gd9_w1118
-Log p-value Tl10B/def_w1118
log2FC Tl10B/def_w1118
-Log p-value spn27Aex/def_w1118
log2FC spn27Aex/def_w1118
-Log p-value Tlrm9/Tlrm10_w1118
log2FC Tlrm9/Tlrm10_w1118
-Log p-value gd9/gd9_w1118_
log2FC gd9/gd9_w1118_
-Log p-value gd9/gd9_Tl10B/def
log2FC gd9/gd9_Tl10B/def
-Log p-value w1118_Tl10B/def
log2FC w1118_Tl10B/def
-Log p-value spn27Aex/def_Tl10B/def
log2FC spn27Aex/def_Tl10B/def
-Log p-value Tlrm9/Tlrm10_Tl10B/def
log2FC Tlrm9/Tlrm10_Tl10B/def
-Log p-value gd9/gd9_Tl10B/def_
log2FC gd9/gd9_Tl10B/def_
-Log p-value gd9/gd9_spn27Aex/def
log2FC gd9/gd9_spn27Aex/def
-Log p-value w1118_spn27Aex/def
log2FC w1118_spn27Aex/def
-Log p-value Tl10B/def_spn27Aex/def
log2FC Tl10B/def_spn27Aex/def
-Log p-value Tlrm9/Tlrm10_spn27Aex/def
log2FC Tlrm9/Tlrm10_spn27Aex/def
-Log p-value gd9/gd9_spn27Aex/def_
log2FC gd9/gd9_spn27Aex/def_
-Log p-value gd9/gd9_Tlrm9/Tlrm10
log2FC gd9/gd9_Tlrm9/Tlrm10
-Log p-value w1118_Tlrm9/Tlrm10
log2FC w1118_Tlrm9/Tlrm10
-Log p-value Tl10B/def_Tlrm9/Tlrm10
log2FC Tl10B/def_Tlrm9/Tlrm10
-Log p-value spn27Aex/def_Tlrm9/Tlrm10
log2FC spn27Aex/def_Tlrm9/Tlrm10
-Log p-value gd9/gd9_Tlrm9/Tlrm10_
log2FC gd9/gd9_Tlrm9/Tlrm10_
-Log p-value w1118_gd9/gd9
log2FC w1118_gd9/gd9
-Log p-value Tl10B/def_gd9/gd9
log2FC Tl10B/def_gd9/gd9
-Log p-value spn27Aex/def_gd9/gd9
log2FC spn27Aex/def_gd9/gd9
-Log p-value Tlrm9/Tlrm10_gd9/gd9
log2FC Tlrm9/Tlrm10_gd9/gd9
Protein IDs	Protein Group Annotations
Majority protein IDs
Protein names
Gene names
id

## Sheet: data
gd9/gd9_01	gd9/gd9_02	gd9/gd9_03	gd9/gd9_04	gd9/gd9_05	gd9/gd9_06	Tlrm9/Tlrm10_01	Tlrm9/Tlrm10_02	Tlrm9/Tlrm10_03	spn27Aex/def_01	spn27Aex/def_02	spn27Aex/def_03	spn27Aex/def_04	spn27Aex/def_05	spn27Aex/def_06	Tl10B/def_01	Tl10B/def_02	Tl10B/def_03	w1118_01	w1118_02	w1118_03	Protein names	Gene names	id	ANOVA significant	Gene ontology (biological process)	Gene ontology (cellular component)	Gene ontology (molecular function)	Peptides	Unique peptides	Sequence coverage [%]	Mol. weight [kDa]	Q-value	Score	Intensity	MS/MS Count	-Log ANOVA p value	ANOVA q-value	-Log p-value gd9/gd9_WTG	log2FC gd9/gd9_WTG	-Log p-value Tl10B/def_WTG	log2FC Tl10B/def_WTG	-Log p-value spn27Aex/def_WTG	log2FC spn27Aex/def_WTG	-Log p-value Tlrm9/Tlrm10_WTG	log2FC Tlrm9/Tlrm10_WTG	-Log p-value gd9/gd9_WTG_	log2FC gd9/gd9_WTG_	-Log p-value gd9/gd9_Tl10B/def	log2FC gd9/gd9_Tl10B/def
26.3269	NaN	26.6769	24.4751	25.4417	NaN	23.9684	26.1988	NaN	25.3815	25.9282	25.0009	26.603	25.8116	24.8584	24.9854	25.4611	25.2209	24.0405	24.9875	24.5062	Structure-specific endonuclease subunit SLX4	mus312	0		DNA repair [GO:0006281];DNA replication [GO:0006260];DNA replication [GO:0006260]";homologous recombination [GO:0035825];interstrand cross-link repair [GO:0036297];meiotic chromosome segregation [GO:0045132];meiotic DNA double-strand break processing [GO:0000706];oocyte fate determination [GO:0030716];reciprocal meiotic recombination [GO:0007131];resolution of meiotic recombination intermediates …	Slx1-Slx4 complex [GO:0033557]";"protein-containing complex [GO:0032991];Slx1-Slx4 complex [GO:0033557]	crossover junction endodeoxyribonuclease activity [GO:0008821]";"5'-flap endonuclease activity [GO:0017108];5'-flap endonuclease activity [GO:0017108];crossover junction endodeoxyribonuclease activity [GO:0008821]	8	8	10.8	128.67	0	13.474	426630000	15	0.494897	0.405985	0.962108	1.21876	1.09279	0.711051	1.41113	1.08585	0.243115	0.572196	0.962108	1.21876	0.364802	0.50771
29.0539	28.7132	28.0486	28.9817	28.4404	28.5564	29.0755	28.4315	29.4115	28.9919	28.5663	28.5516	28.4274	28.8322	28.8351	28.802	28.5535	28.6653	27.1758	28.3068	28.6186	H/ACA ribonucleoprotein complex non-core subunit NAF1	CG10341	1		ribosome biogenesis [GO:0042254];ribosome biogenesis [GO:0042254]";rRNA processing [GO:0006364]";"pseudouridine synthesis [GO:0001522]	small nucleolar ribonucleoprotein complex [GO:0005732]";"nucleus [GO:0005634]	RNA binding [GO:0003723]	7	7	16	62.14	0	78.584	5279500000	105	0.953323	0.214834	0.845037	0.598641	0.651528	0.639914	1.14345	0.667037	0.830685	0.939112	0.845037	0.598641	0.065096	-0.0412728
35.1409	35.2002	35.2736	36.0851	35.4612	36.0876	35.836	35.5943	36.1002	35.5412	35.0444	35.4378	35.459	36.1468	35.4642	35.6677	35.572	35.6358	35.9853	35.8683	36.5075	Protein l(2)37Cc	l(2)37Cc	2		multicellular organism development [GO:0007275]";"cellular response to hypoxia [GO:0071456]	mitochondrion [GO:0005739]";"membrane [GO:0016020];membrane [GO:0016020]		33	33	96	30.383	0	323.31	644240000000	1952	0.818943	0.279791	1.06343	-0.578938	1.17325	-0.495247	1.34509	-0.604806	0.493137	-0.276909	1.06343	-0.578938	0.120435	-0.0836913
25.7425	25.8047	NaN	23.9223	NaN	NaN	26.2047	25.6741	NaN	25.0764	25.6514	25.2871	25.9553	25.2557	25.2336	NaN	NaN	NaN	NaN	25.7432	25.6455			3		regulation of alternative mRNA splicing, via spliceosome [GO:0000381]	nucleoplasm [GO:0005654]	mRNA binding [GO:0003729];RNA binding [GO:0003723]";"metal ion binding [GO:0046872];"mRNA binding [GO:0003729]	7	6	10.8	107.42	0.00018129	6.3532	382960000	9	0.306822	0.585468	0.260801	-0.537841	0	NaN	0.53716	-0.284479	0.337564	0.244999	0.260801	-0.537841	0	NaN
NaN	25.7165	NaN	25.9634	NaN	24.2362	NaN	NaN	NaN	NaN	24.3788	NaN	26.0106	23.5446	NaN	24.9488	26.1283	25.0519	24.5153	25.6968	NaN		CG45784-RA	4		signal transduction [GO:0007165]	myosin complex [GO:0016459]	ATP binding [GO:0005524];ATPase activity, coupled [GO:0042623];motor activity [GO:0003774]";"actin binding [GO:0003779]	2	2	1	240.76	0.0076848	1.3857	234930000	10	0.103373	0.825365	0.0838325	0.19927	0.149832	0.270254	0.16399	-0.461402	0	NaN	0.0838325	0.19927	0.0365429	-0.0709845
27.1103	27.371	25.4524	26.5936	29.2953	25.6809	27.9545	28.9311	25.9559	26.3245	27.5189	26.6986	26.7548	24.613	24.9005	26.5245	24.1808	23.7163	25.3167	27.4369	26.6327		mim	5		filopodium assembly [GO:0046847];germ cell migration [GO:0008354];negative regulation of receptor-mediated endocytosis [GO:0048261];plasma membrane organization [GO:0007009]";"border follicle cell migration [GO:0007298]	protein-containing complex [GO:0032991]	phospholipid binding [GO:0005543];protein homodimerization activity [GO:0042803];SH3 domain binding [GO:0017124]";"actin binding [GO:0003779]	11	11	7.3	178.14	0	26.349	1391100000	46	0.86211	0.196933	0.195461	0.45516	0.708536	-1.65489	0.159867	-0.327056	0.464671	1.15173	0.195461	0.45516	1.12799	2.11005
29.0824	29.2361	27.626	28.7234	29.4383	29.2645	28.4765	29.4293	28.6372	28.7318	29.1622	27.426	29.5202	28.3299	29.3154	29.2483	29.2475	29.4206	28.1635	29.2741	28.2772			6					11	11	32.4	44.4	0	237.21	5492500000	117	0.162041	0.753816	0.29664	0.323511	0.961385	0.73385	0.128362	0.175981	0.23626	0.276041	0.29664	0.323511	0.469325	-0.410338
28.2859	28.8198	27.705	28.4061	28.0407	28.2039	27.4879	28.0147	27.7406	27.8339	27.6847	27.8542	28.1901	27.9032	27.493	28.4775	28.466	27.7359	27.8761	27.4956	27.6053	Protein lap1	Lap1	7		protein transport [GO:0015031]";"establishment or maintenance of cell polarity [GO:0007163]	adherens junction [GO:0005912]		14	14	20.5	96.147	0	88.477	3346700000	96	1.3574	0.125417	1.38285	0.58457	0.984856	0.567478	0.491348	0.167525	0.177856	0.088754	1.38285	0.58457	0.0213293	0.0170921
25.0757	26.1312	26.9189	24.7507	25.8082	25.9414	24.5036	25.0651	NaN	26.3135	25.9124	26.7334	25.652	24.8924	26.1069	26.518	25.5421	26.538	26.7209	26.1739	26.8559	PRADC1-like protein	CG9849	8		muscle cell fate determination [GO:0007521]	extracellular region [GO:0005576]		5	5	24	21.551	0	73.293	844270000	31	1.12584	0.138346	0.865731	-0.812591	0.420821	-0.384221	0.827132	-0.6485	1.87722	-1.79923	0.865731	-0.812591	0.367294	-0.42837
32.8537	32.6861	32.7122	33.5416	32.6648	33.1906	33.7721	33.332	33.9069	33.3985	33.2006	33.4738	33.2471	33.631	33.3431	33.3913	33.3975	33.6274	33.9706	33.2839	33.7307	3-hydroxyisobutyrate dehydrogenase;Probable 3-hydroxyisobutyrate dehydrogenase, mitochondrial	CG15093	9	+	valine catabolic process [GO:0006574]";"cellular amino acid metabolic process [GO:0006520];valine catabolic process [GO:0006574]	mitochondrion [GO:0005739]	NAD binding [GO:0051287];NADP binding [GO:0050661];NADP binding [GO:0050661]";oxidoreductase activity, acting on the CH-OH group of donors, NAD or NADP as acceptor [GO:0016616]";"3-hydroxyisobutyrate dehydrogenase activity [GO:0008442]	22	22	73.8	33.883	0	323.31	135700000000	892	2.24492	0.0358645	1.63489	-0.720256	0.367661	-0.189663	0.893673	-0.279378	0.0106563	0.00858943	1.63489	-0.720256	1.351	-0.530593
34.7586	34.3879	35.024	34.6545	34.4084	34.9341	35.0245	34.3619	35.1748	34.5132	34.4829	34.6106	34.6756	35.1692	34.8062	34.4305	34.3996	34.4104	34.6509	34.2576	34.6543	Succinyl-CoA ligase subunit beta	skap	11		sperm individualization [GO:0007291];tricarboxylic acid cycle [GO:0006099]";"positive regulation of cysteine-type endopeptidase activity involved in apoptotic process [GO:0043280]	mitochondrion [GO:0005739];succinate-CoA ligase complex (ADP-forming) [GO:0009361]";"Cul3-RING ubiquitin ligase complex [GO:0031463]	magnesium ion binding [GO:0000287];succinate-CoA ligase (ADP-forming) activity [GO:0004775]";"ATP binding [GO:0005524]	33	33	65.4	48.983	0	323.31	348130000000	1131	0.508852	0.490894	0.436827	0.17367	0.335886	-0.107399	0.501788	0.188698	0.517483	0.33282	0.436827	0.17367	0.928753	0.281069
28.5787	27.8206	27.1295	27.8464	26.3895	27.2654	27.4658	27.103	25.4788	26.2191	27.095	26.5992	26.1192	26.1257	25.4309	26.7338	26.2141	27.7321	26.3521	26.1243	26.9388	Oxysterol-binding protein		12		lipid transport [GO:0006869];phospholipid transport [GO:0015914]	integral component of membrane [GO:0016021];intracellular membrane-bounded organelle [GO:0043231];membrane [GO:0016020]";"cytosol [GO:0005829];integral component of membrane [GO:0016021]	lipid binding [GO:0008289];sterol binding [GO:0032934];sterol transporter activity [GO:0015248]";"cholesterol binding [GO:0015485]	14	1	20.8	89.535	0	32.253	1473200000	56	1.07824	0.148174	1.17852	1.0333	0.344305	0.421619	0.228246	-0.206846	0.116656	0.21085	1.17852	1.0333	0.537284	0.611685
24.4608	NaN	NaN	23.9793	23.9214	NaN	24.4584	25.3267	NaN	24.9588	24.5613	NaN	25.0903	23.6048	23.7548	24.2101	25.0861	24.1229	NaN	25.6269	NaN		pre-mod(mdg4)-Z	13					5	5	43.9	14.009	0.00018047	6.029	175600000	13	0.252622	0.642894	0	-1.50637	0	-1.15381	0	-1.23289	0	-0.734323	0	-1.50637	0.428205	-0.352568
24.3703	24.9598	25.372	25.4431	25.654	25.6887	23.6508	25.1485	NaN	NaN	NaN	25.0293	NaN	NaN	NaN	NaN	NaN	25.6746	NaN	NaN	NaN		Irk1	14		potassium ion import [GO:0010107];potassium ion transport [GO:0006813];regulation of ion transmembrane transport [GO:0034765];regulation of membrane potential [GO:0042391];wing disc development [GO:0035220]";"locomotor rhythm [GO:0045475]	integral component of membrane [GO:0016021]	inward rectifier potassium channel activity [GO:0005242]	6	6	12.9	58.305	0	14.652	247390000	12	0.82207	0.258014	0	NaN	0	NaN	0	NaN	0	NaN	0	NaN	0	-0.42658
27.359	27.058	25.508	26.4531	27.1271	26.5521	27.0426	26.9813	25.6841	28.0541	27.8009	27.6878	28.1467	26.4126	28.2539	27.7026	28.0756	27.5136	28.1273	27.4633	27.5287		pre-mod(mdg4)-W	15					4	4	47.1	12.177	0	16.904	2141600000	48	1.70648	0.0545156	1.34385	-1.03023	0.0753379	0.0574767	0.0155499	0.0195529	1.08936	-1.1371	1.34385	-1.03023	1.46481	-1.08771
29.4413	30.3014	29.7709	29.3335	28.6101	28.9316	29.3349	29.1518	28.5385	28.919	28.3857	28.9537	29.0993	28.6529	28.8785	27.3694	28.6089	28.5618	29.0372	29.0286	28.4033	Syntaxin-1A	Syx1A	16		exocytosis [GO:0006887];haltere development [GO:0007482];intracellular protein transport [GO:0006886];mitotic cytokinesis [GO:0000281];neuromuscular synaptic transmission [GO:0007274];neurotransmitter secretion [GO:0007269];regulation of exocytosis [GO:0017157];regulation of pole plasm oskar mRNA localization [GO:0007317];synaptic vesicle docking [GO:0016081];synaptic vesicle fusion to presynapti…	endomembrane system [GO:0012505];integral component of membrane [GO:0016021];intracellular [GO:0005622]";lysosomal membrane [GO:0005765];plasma membrane [GO:0005886];presynaptic active zone membrane [GO:0048787];presynaptic membrane [GO:0042734];SNARE complex [GO:0031201];synaptic vesicle [GO:0008021];synaptic vesicle membrane [GO:0030672];terminal bouton [GO:0043195]";"cell junction [GO:0030054]…	SNARE binding [GO:0000149]";"SNAP receptor activity [GO:0005484]	14	14	45	33.648	0	233.4	6100100000	126	1.45271	0.0892335	0.749931	0.575087	0.634822	-0.643025	0.0135412	-0.0081857	0.227044	0.18537	0.749931	0.575087	1.53287	1.21811
29.382	29.0487	28.7159	29.667	28.9008	28.7757	29.3358	28.9834	29.0642	29.791	29.6957	29.2566	29.1336	28.4176	29.3216	29.1664	29.7011	29.046	29.3232	28.7057	28.7233		Lpin;CG8709-RH	17		cellular response to starvation [GO:0009267];fatty acid catabolic process [GO:0009062];imaginal disc-derived wing vein specification [GO:0007474];lipid homeostasis [GO:0055088];negative regulation of BMP signaling pathway [GO:0030514];positive regulation of insulin receptor signaling pathway [GO:0046628];positive regulation of phosphatidylinositol 3-kinase signaling [GO:0014068];positive regulati…	cytosol [GO:0005829];female germline ring canal inner rim [GO:0035183];nucleus [GO:0005634]";"cytoplasm [GO:0005737]	transcription coactivator activity [GO:0003713]";"phosphatidate phosphatase activity [GO:0008195]	37	37	41.4	114.69	0	183.34	7096000000	222	0.161795	0.779658	0.262457	0.164303	0.607031	0.387111	0.508705	0.351984	0.386564	0.210423	0.262457	0.164303	0.37914	-0.222808
33.2454	33.1383	33.2402	32.9141	33.2245	32.9074	32.5297	33.0588	32.8676	33.3188	33.2563	33.1264	33.025	33.1516	33.0482	32.5507	32.7206	32.9486	32.854	33.1871	33.0976	Protein groucho	gro	18		epidermal growth factor receptor signaling pathway [GO:0007173];fibroblast growth factor receptor signaling pathway [GO:0008543];negative regulation of canonical Wnt signaling pathway [GO:0090090];negative regulation of smoothened signaling pathway [GO:0045879];negative regulation of transcription by RNA polymerase II [GO:0000122];negative regulation of transcription, DNA-templated [GO:0045892];n…	nucleus [GO:0005634];protein-containing complex [GO:0032991];transcription factor complex [GO:0005667]";"nucleoplasm [GO:0005654];nucleus [GO:0005634]	HMG box domain binding [GO:0071837];repressing transcription factor binding [GO:0070491];transcription corepressor activity [GO:0003714];transcription factor binding [GO:0008134]";"CRD domain binding [GO:0071906]	40	40	56.9	78.663	0	323.31	98256000000	844	1.83833	0.0936489	0.228964	0.0653877	0.9408	-0.30631	0.535795	0.108137	0.547155	-0.227548	0.228964	0.0653877	1.729	0.371698
35.9863	36.0397	36.3285	36.7601	36.2687	36.301	36.8174	36.5819	36.5855	36.5621	35.9587	36.1439	36.4044	36.7784	36.9595	36.5439	36.2711	36.3834	36.7277	36.6101	36.6042	Elongation factor 1-gamma	Ef1gamma	19		translational elongation [GO:0006414]	eukaryotic translation elongation factor 1 complex [GO:0005853];nucleus [GO:0005634]";"cytoplasm [GO:0005737]	translation elongation factor activity [GO:0003746]";"glutathione transferase activity [GO:0004364];translation elongation factor activity [GO:0003746]	51	51	80.7	48.967	0	323.31	1076200000000	2696	0.587485	0.434716	1.1987	-0.366602	1.3073	-0.247865	0.340923	-0.179482	0.0562981	0.0142924	1.1987	-0.366602	0.290207	-0.118737
23.4482	25.5927	25.7354	23.6168	25.2307	25.8021	NaN	NaN	25.1932	25.9297	24.6559	26.621	24.5247	26.6403	25.7629	26.1708	NaN	NaN	NaN	25.0947	26.4497		CG2246-RB;CG2246-RA	21		nucleoside metabolic process [GO:0009116];nucleotide biosynthetic process [GO:0009165];purine nucleotide biosynthetic process [GO:0006164]";"5-phosphoribose 1-diphosphate biosynthetic process [GO:0006015]	ribose phosphate diphosphokinase complex [GO:0002189]";"cytoplasm [GO:0005737]	magnesium ion binding [GO:0000287];ribose phosphate diphosphokinase activity [GO:0004749]";"enzyme regulator activity [GO:0030234]	27	1	82.1	42.646	0	113	667780000	25	0.440648	0.453014	0.448879	-0.867862	0	0.398607	0.0379524	-0.0831121	0	-0.579014	0.448879	-0.867862	0	-1.26647
31.926	31.6359	31.7019	31.5975	31.5315	31.8115	31.4107	31.4811	31.871	31.7229	31.4449	31.6762	31.2634	31.4564	31.1232	31.8252	31.3562	31.3875	32.1224	31.5928	31.6819		Su(var)2-10	22		chromosome organization [GO:0051276];compound eye development [GO:0048749];defense response to Gram-negative bacterium [GO:0050829];double-strand break repair via homologous recombination [GO:0000724];hemopoiesis [GO:0030097];imaginal disc growth [GO:0007446];negative regulation of JAK-STAT cascade [GO:0046426];positive regulation of innate immune response [GO:0045089]";"chromosome condensation […	nuclear lamina [GO:0005652];nucleoplasm [GO:0005654];nucleus [GO:0005634];polytene chromosome [GO:0005700];polytene chromosome, telomeric region [GO:0035012]";"cytoplasm [GO:0005737]	zinc ion binding [GO:0008270]";"DNA binding [GO:0003677]	29	1	61.6	64.671	0	323.31	35774000000	463	0.698319	0.395656	0.301235	-0.0983343	0.547589	-0.276096	1.07285	-0.351213	0.413457	-0.211465	0.301235	-0.0983343	0.657211	0.177761
34.8366	35.2293	33.3553	34.6078	34.6365	33.4557	34.0068	34.7263	33.9472	34.5728	34.7979	33.154	35.067	33.7923	34.8412	35.1946	33.9952	33.0105	34.4756	34.6663	33.9866	CCHC-type zinc finger protein CG3800	CG3800	23				zinc ion binding [GO:0008270]";"nucleic acid binding [GO:0003676]	13	13	72.1	17.615	0	323.31	274050000000	835	0.0103397	0.984255	0.016108	-0.0225938	0.177093	-0.309362	0.00383581	-0.00527827	0.176009	-0.149381	0.016108	-0.0225938	0.182753	0.286768
26.1833	26.1457	25.5	25.5815	27.2204	25.2019	26.4096	26.847	26.4078	25.8697	26.1371	26.0483	25.6836	25.6269	25.6599	27.2453	25.296	26.3611	24.6714	26.1753	NaN		CG18659-RA	24		endocytosis [GO:0006897];regulation of Rab protein signal transduction [GO:0032483]";"endocytic recycling [GO:0032456]	cytosol [GO:0005829];intracellular membrane-bounded organelle [GO:0043231]";"clathrin-coated vesicle [GO:0030136]	Rab GTPase binding [GO:0017137];Rab guanyl-nucleotide exchange factor activity [GO:0017112]";"phosphatidylinositol phosphate binding [GO:1901981]	10	10	15.1	98.399	0	12.524	754470000	26	0.484089	0.427208	0.369761	0.548796	0.387403	0.877469	0.483475	0.414267	0.819178	1.13144	0.369761	0.548796	0.23616	-0.328673
31.3174	31.7345	31.5793	31.2519	31.3103	31.4505	31.1304	31.2639	30.9054	31.3349	31.4774	31.1784	31.336	30.8874	30.8781	31.1251	31.2988	31.2776	31.0921	31.2851	30.678		ctrip	25		negative regulation of histone H2A K63-linked ubiquitination [GO:1901315];positive regulation of circadian rhythm [GO:0042753];positive regulation of protein catabolic process [GO:0045732];ubiquitin-dependent protein catabolic process [GO:0006511]";"cellular response to DNA damage stimulus [GO:0006974]	nucleus [GO:0005634]";"nuclear speck [GO:0016607]	zinc ion binding [GO:0008270]";"ubiquitin-protein transferase activity [GO:0004842]	68	68	27.4	333.7	0	323.31	26572000000	594	1.0484	0.239951	1.4582	0.422258	0.502987	0.215424	0.378956	0.163637	0.146143	0.0815411	1.4582	0.422258	0.919913	0.206834
30.0691	29.5477	29.4034	29.5907	29.7111	28.95	29.6644	28.8383	28.8333	30.0062	29.827	28.8734	30.0044	29.4392	29.2931	29.2978	28.8652	28.973	30.2878	29.1506	29.3615		4EHP;4EHP-RB	26		positive regulation of ecdysteroid biosynthetic process [GO:0045998]";"negative regulation of translation [GO:0017148]	cytoplasm [GO:0005737]	translation initiation factor activity [GO:0003743];translation repressor activity [GO:0030371]";"RNA 7-methylguanosine cap binding [GO:0000340]	8	8	35	25.773	0	21.897	8470400000	121	0.548539	0.411532	0.0613979	-0.0546487	0.675959	-0.55467	0.0253585	-0.0261145	0.475372	-0.487984	0.0613979	-0.0546487	1.14345	0.500021
30.191	29.5717	29.8913	30.0592	29.2347	28.9053	29.3418	29.1927	29.5805	29.4269	29.2773	29.8593	29.668	29.5756	29.61	29.2228	29.6484	29.1823	30.0669	29.6607	28.6724	Tetratricopeptide repeat protein 14 homolog	CG6621	27					32	32	37.9	99.383	0	92.639	8907500000	224	0.0909894	0.870205	0.169593	0.175509	0.0937128	-0.115516	0.131462	0.102835	0.0779924	-0.0950292	0.169593	0.175509	0.413949	0.291025
21.1917	29.1927	NaN	24.0016	30.9697	NaN	27.724	NaN	26.5439	30.4803	30.1057	27.4175	27.7246	NaN	26.1749	26.0559	28.2001	26.3995	NaN	24.5958	27.1007			28			cytoskeleton [GO:0005856]		6	6	4.4	168.18	0.00017621	4.3391	3046500000	15	0.118745	0.785512	0.0482946	0.490701	0.324724	1.03695	0.798465	2.53236	0.345718	1.28572	0.0482946	0.490701	0.0707554	-0.54625
28.7925	29.4557	29.4743	29.4591	28.8345	29.2859	28.9026	28.3742	28.4485	28.3544	28.5079	28.548	28.0116	28.5593	28.0784	28.9635	29.3565	28.9557	27.3656	28.5915	28.8769	Copper homeostasis protein cutC homolog	CG6136	29	+	copper ion homeostasis [GO:0055070]		copper ion binding [GO:0005507]	13	13	64.3	28.916	0	128.27	5295100000	110	2.33528	0.025087	1.46144	0.939021	0.778253	0.813905	0.0697197	0.0652828	0.237622	0.297091	1.46144	0.939021	0.243899	0.125116
26.5863	26.4622	26.6305	26.0594	26.0652	26.0632	24.9208	25.648	24.9361	26.8542	27.8341	26.309	27.306	25.5787	26.281	26.8484	25.7075	25.9474	25.4851	25.5734	24.3131	Protein-tyrosine-phosphatase;Tyrosine-protein phosphatase 99A	Ptp99A	30	+	defasciculation of motor neuron axon [GO:0007415];motor neuron axon guidance [GO:0008045];protein dephosphorylation [GO:0006470]";"axonal defasciculation [GO:0007414]	integral component of membrane [GO:0016021];plasma membrane [GO:0005886]";"axon [GO:0030424];integral component of membrane [GO:0016021]	transmembrane receptor protein tyrosine phosphatase activity [GO:0005001]";"protein tyrosine phosphatase activity [GO:0004725];protein tyrosine phosphatase activity [GO:0004725]	11	11	14.8	103.85	0	20.211	928170000	33	2.25215	0.0236017	2.16579	1.18728	0.911891	1.0439	1.60665	1.57	0.0317437	0.0444164	2.16579	1.18728	0.203281	0.143375
27.4638	27.2941	27.4269	26.9482	26.1864	26.5884	27.6875	28.4545	26.3054	27.5087	28.1862	27.9886	27.0154	26.5682	27.7229	26.5316	28.1393	25.9657	27.646	27.8703	26.532		pre-mod(mdg4)-V	31					7	7	32.9	18.815	0	40.601	1874900000	68	0.180355	0.722418	0.395501	-0.364802	0.240487	-0.470599	0.123397	0.148923	0.0613331	0.133049	0.395501	-0.364802	0.0726066	0.105798
25.8928	24.9477	24.2483	30.2725	30.0282	30.0882	30.4301	30.9559	31.0054	30.8205	30.2027	29.9904	28.4814	30.5664	28.9231	29.3549	28.5833	28.5785	29.7962	30.0813	30.535	Ubiquitin-conjugating enzyme E2-17 kDa	UbcD6	32		centrosome cycle [GO:0007098];centrosome separation [GO:0051299];DNA repair [GO:0006281];endocytic recycling [GO:0032456];negative regulation of apoptotic process [GO:0043066];negative regulation of DNA damage response, signal transduction by p53 class mediator [GO:0043518];negative regulation of intrinsic apoptotic signaling pathway in response to DNA damage by p53 class mediator [GO:1902166];po…	HULC complex [GO:0033503];nuclear chromatin [GO:0000790];nucleus [GO:0005634]";"cytoplasm [GO:0005737]	p53 binding [GO:0002039];protein domain specific binding [GO:0019904];transferase activity [GO:0016740]";ubiquitin conjugating enzyme activity [GO:0061631];ubiquitin-protein transferase activity [GO:0004842]";"ATP binding [GO:0005524]	6	6	82.1	17.152	0	323.31	11914000000	110	1.08813	0.126578	0.751559	-2.5579	1.74331	-1.29859	0.215123	-0.306765	1.09549	0.659674	0.751559	-2.5579	0.314485	-1.25931
30.8201	30.8136	30.9069	30.5646	30.4669	30.0976	30.9396	31.0186	30.7694	30.8712	31.0779	30.3636	31.0795	30.4249	30.7682	30.2634	31.0744	30.6108	30.7031	30.6666	30.0483	Transcription initiation factor TFIID subunit 1	Taf1	33		DNA-templated transcription, initiation [GO:0006352];histone H3-K14 acetylation [GO:0044154];histone H4 acetylation [GO:0043967];positive regulation of transcription by RNA polymerase II [GO:0045944];positive regulation of transcription initiation from RNA polymerase II promoter [GO:0060261];positive regulation of transcription of Notch receptor target [GO:0007221];protein phosphorylation [GO:000…	nucleoplasm [GO:0005654];nucleus [GO:0005634];PRC1 complex [GO:0035102];transcription factor TFIID complex [GO:0005669]";"nucleolus [GO:0005730];transcription factor TFIID complex [GO:0005669]	H4 histone acetyltransferase activity [GO:0010485];histone acetyltransferase activity (H3-K14 specific) [GO:0036408];histone acetyltransferase activity [GO:0004402];histone acetyltransferase activity [GO:0004402]";protein serine/threonine kinase activity [GO:0004674];sequence-specific DNA binding [GO:0043565];TBP-class protein binding [GO:0017025];transcription factor binding [GO:0008134]";transf…	69	69	38.5	235.56	0	323.31	20165000000	585	0.318118	0.625066	0.250245	0.138933	0.217225	0.176828	0.60236	0.291524	0.906087	0.436506	0.250245	0.138933	0.0566289	-0.0378958
28.5652	27.9588	28.8384	27.7855	27.1249	28.5451	27.6557	27.3269	27.0637	27.1087	28.4105	28.5904	28.0584	27.8628	27.2712	27.9379	26.1993	27.7794	28.363	27.9419	28.7314		Fmr1	35				RNA binding [GO:0003723]	52	0	68.4	81.028	0	53.927	3743200000	50	0.783659	0.254591	0.204631	-0.209117	0.801057	-1.0399	0.566117	-0.461756	1.6017	-0.996643	0.204631	-0.209117	0.80118	0.830784
NaN	NaN	NaN	NaN	NaN	NaN	26.5689	28.004	NaN	26.1819	NaN	29.5117	25.8612	29.7098	25.2884	NaN	27.258	NaN	26.7327	NaN	26.5792	Homeobox protein prospero	pros	36		asymmetric neuroblast division [GO:0055059];asymmetric neuroblast division resulting in ganglion mother cell formation [GO:0055060];axon development [GO:0061564];axon guidance [GO:0007411];axonogenesis [GO:0007409];axonogenesis involved in innervation [GO:0060385];brain development [GO:0007420];cell dedifferentiation [GO:0043697];cell fate commitment [GO:0045165];cell fate specification [GO:00017…	basal cortex [GO:0045180];basal part of cell [GO:0045178];cell cortex [GO:0005938];nucleus [GO:0005634];plasma membrane [GO:0005886]";"apical cortex [GO:0045179]	DNA-binding transcription factor activity [GO:0003700];proximal promoter DNA-binding transcription repressor activity, RNA polymerase II-specific [GO:0001078];sequence-specific DNA binding [GO:0043565]";"DNA binding [GO:0003677];DNA binding [GO:0003677]	4	4	3.1	181.54	0.0018506	2.232	1938100000	12	0.0438181	0.916627	0	NaN	0	0.602049	0.156314	0.654683	0.323854	0.630535	0	NaN	0	NaN
30.5859	31.7042	31.5208	30.5024	30.5574	30.2264	30.4339	30.7686	30.8613	30.1561	30.9369	30.8181	30.6581	31.0359	30.5317	30.4477	31.031	31.3989	30.2299	30.6692	30.6536	DNA-directed RNA polymerase subunit;DNA-directed RNA polymerase II subunit RPB9	RpII15	37		mitotic cell cycle [GO:0000278];mRNA cleavage [GO:0006379];transcription by RNA polymerase II [GO:0006366];transcription initiation from RNA polymerase II promoter [GO:0006367]";transcription, DNA-templated [GO:0006351]";transcription-coupled nucleotide-excision repair [GO:0006283];"maintenance of transcriptional fidelity during DNA-templated transcription elongation from RNA polymerase II promot…	nucleus [GO:0005634];RNA polymerase II, core complex [GO:0005665]";"nucleolus [GO:0005730];nucleolus [GO:0005730]	nucleic acid binding [GO:0003676];zinc ion binding [GO:0008270]";"DNA-directed 5'-3' RNA polymerase activity [GO:0003899]	10	10	82.2	15.098	0	323.31	20567000000	229	0.136534	0.806651	0.392055	0.331949	0.638309	0.441624	0.351353	0.171892	0.367476	0.170344	0.392055	0.331949	0.0997841	-0.109675
29.3905	29.0931	27.25	28.9415	29.1472	27.593	28.193	29.1098	28.077	29.4335	29.5544	28.7779	29.3614	26.8078	28.0442	29.1892	30.4287	29.8696	28.6611	28.7399	28.6863		btsz	38		apical junction assembly [GO:0043297];cortical actin cytoskeleton organization [GO:0030866];establishment of planar polarity of embryonic epithelium [GO:0042249];gastrulation involving germ band extension [GO:0010004];larval salivary gland morphogenesis [GO:0007436];lumen formation, open tracheal system [GO:0035149];morphogenesis of embryonic epithelium [GO:0016331];positive regulation of cell si…	exocytic vesicle [GO:0070382]";"apical plasma membrane [GO:0016324];apical plasma membrane [GO:0016324]		34	0	10.6	405.12	0	74.508	5125600000	113	0.562638	0.360703	0.0850124	-0.126523	1.46452	1.13344	0.0173532	-0.0325238	0.291293	-0.235797	0.0850124	-0.126523	1.15259	-1.25997
32.8092	33.3384	34.1111	33.319	33.157	33.7618	33.6001	33.6946	33.999	32.0853	32.5384	32.7298	33.2829	33.4192	32.9647	33.4441	33.0913	33.6877	33.399	33.818	34.0206		Tm1	39					25	2	63.2	29.208	0	323.31	137370000000	629	1.6294	0.072046	0.512876	-0.329799	0.601064	-0.338189	1.61002	-0.909162	0.0286478	0.0186717	0.512876	-0.329799	0.00955645	0.00839043
29.1575	29.6475	29.8359	28.2929	29.5938	28.6624	28.6109	29.355	29.8159	28.9558	29.4846	29.0018	29.4624	29.5314	28.7306	28.5068	29.3784	29.6373	28.5477	28.4277	27.5492		nsl1	40		germ-line stem cell population maintenance [GO:0030718];histone H4-K16 acetylation [GO:0043984];histone H4-K5 acetylation [GO:0043981];histone H4-K8 acetylation [GO:0043982];larval somatic muscle development [GO:0007526];neuromuscular junction development [GO:0007528];oogenesis [GO:0048477];positive regulation of transcription, DNA-templated [GO:0045893];regulation of endocytosis [GO:0030100]";"g…	NSL complex [GO:0044545];nucleus [GO:0005634];polytene chromosome interband [GO:0005705]";"cytoplasm [GO:0005737]	histone acetyltransferase binding [GO:0035035]";"chromatin binding [GO:0003682];histone acetyltransferase binding [GO:0035035]	25	25	20.7	167.73	0	180.75	6078000000	135	1.0475	0.167737	1.34764	1.02344	1.00897	0.9993	2.01318	1.01957	1.08262	1.08575	1.34764	1.02344	0.0192325	0.0241419
35.513	35.7522	35.9319	35.5969	35.7581	35.643	35.8012	35.8805	35.9251	35.7262	35.7626	35.76	35.5833	35.7186	35.5226	35.4511	35.5348	35.231	35.5957	35.5416	35.731		msps	41		bicoid mRNA localization [GO:0045450];centrosome duplication [GO:0051298];cytoplasmic microtubule organization [GO:0031122];endoplasmic reticulum organization [GO:0007029];establishment of mitotic spindle orientation [GO:0000132];establishment or maintenance of microtubule cytoskeleton polarity [GO:0030951];establishment or maintenance of neuroblast polarity [GO:0045196];female meiotic nuclear di…	cytoplasm [GO:0005737];kinetochore [GO:0000776];microtubule associated complex [GO:0005875];microtubule plus-end [GO:0035371];spindle pole [GO:0000922]";"centrosome [GO:0005813]	microtubule plus-end binding [GO:0051010];tubulin binding [GO:0015631]";"microtubule binding [GO:0008017]	165	165	74.1	229.54	0	323.31	612880000000	4001	2.34431	0.070599	0.346938	0.0764478	0.952506	-0.217126	0.343429	0.0561167	1.67199	0.246201	0.346938	0.0764478	1.55369	0.293574
29.3009	29.5095	28.3713	29.7706	29.741	29.4542	30.0097	30.0229	28.4155	29.4648	29.7682	29.0334	30.1886	28.8497	29.0273	29.475	30.2364	31.1172	29.6685	30.8807	30.305	Histone-lysine N-methyltransferase pr-set7	pr-set7	42		cell division [GO:0051301];chromosome condensation [GO:0030261];DNA damage checkpoint [GO:0000077];histone H4-K20 monomethylation [GO:0034771];histone methylation [GO:0016571];negative regulation of histone acetylation [GO:0035067]";"cell cycle [GO:0007049]	polytene chromosome [GO:0005700]";"nucleus [GO:0005634]	histone methyltransferase activity (H4-K20 specific) [GO:0042799];histone-lysine N-methyltransferase activity [GO:0018024]	38	38	55.9	76.492	0	323.31	9484000000	240	0.891757	0.210253	1.33346	-0.926807	0.00472996	-0.00851631	1.27822	-0.896043	0.557135	-0.802027	1.33346	-0.926807	1.13162	-0.91829
29.0929	30.1247	26.6724	28.5683	28.9748	29.1057	29.0266	29.4714	26.7894	29.0927	28.2757	27.0309	28.813	28.8432	28.8393	26.8246	29.3792	27.4716	28.2251	29.092	25.6533		jvl	43		anterior mRNA localization involved in anterior/posterior axis specification [GO:0060813];dorsal appendage formation [GO:0046843];microtubule-based transport [GO:0099111];oocyte localization involved in germarium-derived egg chamber formation [GO:0030720];oocyte microtubule cytoskeleton organization [GO:0016325];oocyte microtubule cytoskeleton organization [GO:0016325]";oocyte nucleus migration i…	microtubule cytoskeleton [GO:0015630]		14	14	13.2	141.05	0	43.077	4903500000	64	0.150812	0.750087	0.537395	1.09967	0.0635316	0.234992	0.462914	0.825676	0.228296	0.772334	0.537395	1.09967	0.466355	0.86468
30.7599	30.266	30.7425	29.961	29.8809	29.9401	30.2833	30.2204	30.5341	29.6539	29.3392	29.776	29.1723	29.9456	29.8782	29.7311	29.8088	30.3821	29.2315	29.2796	28.9652		Nep2	44	+	sperm competition [GO:0046692]";"proteolysis [GO:0006508]	integral component of membrane [GO:0016021];plasma membrane [GO:0005886]";"extracellular space [GO:0005615]	metal ion binding [GO:0046872];metalloendopeptidase activity [GO:0004222];metallopeptidase activity [GO:0008237]";"endopeptidase activity [GO:0004175]	26	26	40.6	86.838	0	323.31	11764000000	274	3.11644	0.00919894	2.49923	1.09961	1.63733	0.815211	1.32306	0.468745	3.01202	1.18715	2.49923	1.09961	0.471033	0.284399
32.3963	31.8034	32.2613	32.0559	31.639	32.0849	31.871	31.3776	32.149	31.5564	31.1307	31.4352	31.4796	31.6879	31.6347	31.6178	31.5537	31.9066	32.1636	31.4515	31.9623		gish	45		glial cell migration [GO:0008347];negative regulation of actin nucleation [GO:0051126];olfactory learning [GO:0008355];ommatidial rotation [GO:0016318];peptidyl-serine phosphorylation [GO:0018105];peptidyl-threonine phosphorylation [GO:0018107];positive regulation of canonical Wnt signaling pathway [GO:0090263];positive regulation of proteasomal ubiquitin-dependent protein catabolic process [GO:0…	nucleus [GO:0005634]";plasma membrane [GO:0005886];sperm individualization complex [GO:0070864]";"cytoplasm [GO:0005737];"nucleus [GO:0005634]	protein serine/threonine kinase activity [GO:0004674]";"ATP binding [GO:0005524]	35	2	64.5	52.626	0	323.31	43714000000	607	1.34437	0.136205	0.362972	0.180971	0.281548	-0.166479	1.09122	-0.371721	0.0675833	-0.0599321	0.362972	0.180971	1.0068	0.34745
NaN	NaN	NaN	NaN	NaN	NaN	NaN	NaN	NaN	NaN	NaN	NaN	25.5032	25.3602	25.0976	NaN	25.3057	25.4449	NaN	NaN	24.0767			47					2	2	20	9.8984	0.003003	1.9702	118460000	4	0.121154	0.860165	0	NaN	0	1.29863	0	1.24368	0	NaN	0	NaN	0	NaN
NaN	25.587	NaN	NaN	25.1909	NaN	24.2488	25.7414	NaN	24.1185	24.9597	NaN	NaN	NaN	25.5212	NaN	NaN	NaN	26.149	24.8202	24.7614		CG2698-RA	48			integral component of membrane [GO:0016021]		7	7	8.2	90.554	0.00018288	7.1017	185050000	12	0.0633074	0.890606	0.0835276	0.145421	0	NaN	0.244424	-0.377046	0.108793	-0.248402	0.0835276	0.145421	0	NaN
29.2269	29.6576	28.6265	28.9674	29.626	29.2095	29.4891	29.6367	29.5097	28.8615	29.1944	28.5996	29.3772	28.7668	28.9909	29.371	30.3517	29.877	28.9834	29.2452	27.0298		SKIP	49		sensory perception of smell [GO:0007608]			24	24	29	110.4	0	258.41	6341800000	193	1.43879	0.0878425	0.785127	0.799534	0.894764	1.44712	0.52188	0.545605	0.736847	1.12573	0.785127	0.799534	1.17262	-0.64759
32.9267	33.052	33.104	33.2968	34.399	33.7418	34.1119	34.5615	34.0166	32.1899	33.4866	33.7222	33.358	33.3641	33.277	33.0388	33.7203	32.8896	33.7116	34.5964	34.334	Probable cytochrome c oxidase subunit 7A, mitochondrial	CG9603	50		mitochondrial respiratory chain supercomplex assembly [GO:0097250];regulation of oxidative phosphorylation [GO:0002082]";"mitochondrial electron transport, cytochrome c to oxygen [GO:0006123]	mitochondrial respiratory chain supercomplex [GO:0097249];mitochondrion [GO:0005739]";"mitochondrial respiratory chain complex IV [GO:0005751];mitochondrial respiratory chain [GO:0005746]	cytochrome-c oxidase activity [GO:0004129]	12	12	72.4	10.832	0	43.87	156070000000	410	1.6237	0.0674589	1.14245	-0.79393	1.27741	-0.997784	1.51778	-0.981022	0.0170486	0.0160001	1.14245	-0.79393	0.220608	0.203854
33.6641	33.5738	34.4169	33.9792	33.4048	34.0414	33.7534	33.5681	33.8427	33.6288	33.4738	33.733	33.7039	33.897	33.5665	33.5973	33.0862	33.5568	33.9106	33.243	33.5372	Uncharacterized protein CG16817	CG16817	51		Golgi organization [GO:0007030];protein folding [GO:0006457]";"chaperone-mediated protein complex assembly [GO:0051131]	cytosol [GO:0005829];endoplasmic reticulum [GO:0005783];nuclear membrane [GO:0031965];nucleus [GO:0005634]";"cytoplasm [GO:0005737]	Hsp90 protein binding [GO:0051879];prostaglandin-E synthase activity [GO:0050220]";"chaperone binding [GO:0051087]	21	21	54.9	20.752	0	323.31	153610000000	759	0.556042	0.452963	0.518642	0.283082	0.23256	-0.150162	0.281832	0.103531	0.307069	0.157789	0.518642	0.283082	0.916428	0.433244
27.1498	26.7718	25.7706	26.3423	24.874	24.8089	NaN	NaN	NaN	25.4951	25.1429	24.243	NaN	23.7338	24.1718	NaN	NaN	NaN	24.1399	NaN	NaN			52			integral component of membrane [GO:0016021]		4	4	19.9	31.424	0	17.371	313650000	20	1.56327	0.0824902	0	1.81296	0	NaN	0	0.417375	0	NaN	0	1.81296	0	NaN
29.2432	29.1965	28.9103	29.4953	28.9027	28.3194	29.1496	28.8571	28.1987	29.4324	29.4385	29.0437	29.3364	28.9437	29.0799	29.0353	29.193	27.7581	28.9903	29.0445	28.0573		pps	53		transcription, DNA-templated [GO:0006351]";"regulation of alternative mRNA splicing, via spliceosome [GO:0000381]	small nuclear ribonucleoprotein complex [GO:0030532]	metal ion binding [GO:0046872]";"hydrolase activity, acting on acid anhydrides [GO:0016817]	43	43	27.6	222	0	183.69	6044200000	226	0.453728	0.477178	0.443456	0.313863	0.0211475	-0.0352592	1.12601	0.515065	0.0297925	0.0377464	0.443456	0.313863	0.405433	0.349122
32.0094	32.3531	32.2265	31.6477	31.8518	31.4629	31.7697	32.0461	32.0557	32.1066	32.3473	32.0252	32.158	31.9494	31.95	31.8846	32.0454	31.9343	31.2451	31.7575	31.3646			54					100	100	42.4	268.01	0	323.31	43077000000	850	1.57557	0.105388	1.11181	0.469496	1.43358	0.499015	2.63781	0.633677	1.29869	0.501428	1.11181	0.469496	0.0507226	-0.0295188
29.7949	29.0341	27.6798	27.7841	26.1393	26.8477	29.4543	28.5877	28.6076	28.8166	29.6307	30.505	29.2698	29.2389	28.9654	28.7381	29.6475	31.4707	28.5631	28.5547	29.4802	Protein spartin	spartin	56		negative regulation of BMP signaling pathway [GO:0030514];negative regulation of synaptic growth at neuromuscular junction [GO:0045886];nervous system development [GO:0007399];neuromuscular synaptic transmission [GO:0007274]";"cell division [GO:0051301]	early endosome [GO:0005769];lipid droplet [GO:0005811];plasma membrane [GO:0005886];presynaptic membrane [GO:0042734];terminal bouton [GO:0043195]";"cell junction [GO:0030054]	Rab GTPase binding [GO:0017137]	8	8	16.5	59.783	0	63.31	6060900000	40	1.2053	0.111642	0.560591	-0.986031	0.56023	1.0861	0.627614	0.538405	0.013579	0.0172183	0.560591	-0.986031	1.16294	-2.07213
NaN	NaN	NaN	NaN	24.5261	NaN	NaN	NaN	NaN	23.8959	25.4083	NaN	24.1794	24.1948	NaN	NaN	NaN	23.1849	NaN	NaN	NaN	Box A-binding factor	srp	57		anatomical structure formation involved in morphogenesis [GO:0048646];animal organ morphogenesis [GO:0009887];autophagy [GO:0006914];cell development [GO:0048468];cell fate commitment [GO:0045165];cell fate determination [GO:0001709];crystal cell differentiation [GO:0042688];dorsal closure [GO:0007391];embryonic heart tube development [GO:0035050];embryonic hemopoiesis [GO:0035162];endoderm devel…	nucleus [GO:0005634]	DNA-binding transcription factor activity [GO:0003700];proximal promoter DNA-binding transcription activator activity, RNA polymerase II-specific [GO:0001077];RNA polymerase II proximal promoter sequence-specific DNA binding [GO:0000978];sequence-specific DNA binding [GO:0043565];transcription regulatory region DNA binding [GO:0044212];zinc ion binding [GO:0008270]";"DNA binding [GO:0003677];"DNA…	2	2	6.4	48.544	0.00017743	4.896	63607000	3	0	1	0	NaN	0	NaN	0	NaN	-4.34294e-08	0	0	NaN	0	1.34118
28.364	26.0341	26.0265	25.883	26.254	NaN	NaN	NaN	NaN	26.5288	26.5484	26.0613	25.4718	26.7127	26.9426	27.1135	27.4049	27.2752	27.6663	28.0238	25.7209		mld	58		ecdysone biosynthetic process [GO:0006697];long-term memory [GO:0007616];positive regulation of circadian sleep/wake cycle, sleep [GO:0045938]";"determination of adult lifespan [GO:0008340]	nucleus [GO:0005634]	zinc ion binding [GO:0008270]";"nucleic acid binding [GO:0003676]	8	8	4.5	210.42	0.00017816	5.154	1173300000	19	0.430931	0.465156	0.326797	-0.624679	0.0614143	0.127502	0.655287	-0.759405	0	NaN	0.326797	-0.624679	0.56174	-0.752181
30.6978	30.5128	30.4951	30.4566	30.1588	30.1757	30.6661	30.8567	30.7845	30.8483	30.7707	30.8418	30.7155	30.509	30.7016	29.7279	30.2982	29.8975	30.7656	30.712	30.7115	E3 UFM1-protein ligase 1 homolog	CG1104	59	+		endomembrane system [GO:0012505]	ligase activity [GO:0016874];transferase activity [GO:0016740]	39	39	53.1	87.481	0	323.31	18618000000	385	4.07936	0.00427642	1.37909	-0.313562	1.94613	-0.75516	0.00643698	0.00144386	0.270148	0.0393829	1.37909	-0.313562	1.4751	0.441598
32.1831	32.117	31.991	32.0488	32.0146	32.1665	32.0575	31.9365	32.3839	31.6689	31.9329	31.7061	32.3571	32.5552	32.1764	32.3069	31.8493	32.2858	32.2635	31.5083	32.0992	Amidophosphoribosyltransferase	Prat	60		determination of adult lifespan [GO:0008340];embryonic cleavage [GO:0040016];glutamine metabolic process [GO:0006541];nucleoside metabolic process [GO:0009116];oogenesis [GO:0048477];purine nucleobase biosynthetic process [GO:0009113];purine nucleobase biosynthetic process [GO:0009113]";purine nucleotide biosynthetic process [GO:0006164]";"'de novo' IMP biosynthetic process [GO:0006189]		amidophosphoribosyltransferase activity [GO:0004044];iron-sulfur cluster binding [GO:0051536];metal ion binding [GO:0046872]";"4 iron, 4 sulfur cluster binding [GO:0051539];"amidophosphoribosyltransferase activity [GO:0004044]	30	24	59.5	59.519	0	323.31	50770000000	566	0.033655	0.957637	0.359335	0.129867	0.279987	0.190342	0.161824	0.109093	0.252647	0.168981	0.359335	0.129867	0.224968	-0.0604753
32.5433	32.5422	32.678	32.2652	31.9937	32.2654	32.3629	32.3112	32.4828	32.2387	32.1338	32.5102	31.9779	32.3795	32.1464	32.4442	32.0419	32.3696	32.5197	32.1767	32.174		scrib	61					70	0	40.2	270.62	0	323.31	60380000000	1035	0.138835	0.853199	0.218399	0.0911563	0.00959791	-0.00491587	0.168952	-0.0590398	0.310514	0.0954971	0.218399	0.0911563	0.228012	0.0960722
28.5172	25.9425	28.6121	29.2081	29.1593	NaN	28.3461	28.2583	26.9707	27.8447	27.6451	27.7133	27.8911	28.4887	26.8363	28.5166	27.1183	27.9817	28.4647	28.2132	28.2084	Polycomb protein Scm	Scm	62		chromatin organization [GO:0006325];compound eye development [GO:0048749];gene silencing [GO:0016458];germarium-derived female germ-line cyst encapsulation [GO:0030708];negative regulation of growth [GO:0045926];negative regulation of transcription, DNA-templated [GO:0045892];neurogenesis [GO:0022008];ovarian follicle cell stalk formation [GO:0030713];ventral cord development [GO:0007419]";"axono…	polytene chromosome [GO:0005700];PRC1 complex [GO:0035102]";"nucleus [GO:0005634];nucleus [GO:0005634]	PRC1 complex binding [GO:0140259];zinc ion binding [GO:0008270]";"identical protein binding [GO:0042802];zinc ion binding [GO:0008270]	9	9	12.9	93.55	0	22.857	2870200000	39	0.0987586	0.838162	0.00313949	-0.007584	0.435804	-0.423188	0.8944	-0.558886	0.41023	-0.437058	0.00313949	-0.007584	0.190534	0.415604
28.0352	27.2293	27.8289	27.6879	27.7354	26.5935	28.4305	27.439	27.1509	27.3315	27.3679	27.3454	26.9909	27.4119	27.2991	28.1682	27.8593	27.5292	26.3454	26.8741	27.2039	Lateral signaling target protein 2 homolog	CG6051	63			early endosome membrane [GO:0031901]	metal ion binding [GO:0046872]	13	13	20.2	108.8	0	154.87	2170400000	61	1.18299	0.143245	1.07244	0.710544	1.54867	1.04444	1.4397	0.48333	0.873732	0.865677	1.07244	0.710544	0.451323	-0.333896
36.0287	35.9302	36.1266	36.135	35.9996	35.9987	36.0147	35.7029	35.9701	35.6039	35.5565	35.609	35.7009	36.1126	36.191	36	35.9976	36.0619	36.3764	36.1909	36.2015	40S ribosomal protein S8	RpS8	64		larval lymph gland hemopoiesis [GO:0035167];maturation of SSU-rRNA from tricistronic rRNA transcript (SSU-rRNA, 5.8S rRNA, LSU-rRNA) [GO:0000462];translation [GO:0006412]";"cytoplasmic translation [GO:0002181];translation [GO:0006412]	cytosolic small ribosomal subunit [GO:0022627]";"cytosolic ribosome [GO:0022626];ribosome [GO:0005840]	structural constituent of ribosome [GO:0003735]	30	30	75.5	23.759	0	323.31	772010000000	1779	1.61581	0.123401	2.02928	-0.219826	1.6851	-0.236443	1.4956	-0.460627	1.46167	-0.360409	2.02928	-0.219826	0.126029	0.0166168
25.1979	30.6881	28.1469	27.891	27.361	28.5153	25.6158	25.1549	24.8729	24.5522	27.6132	24.556	26.7717	27.4246	23.7487	NaN	26.5207	24.468	26.7568	27.0771	27.4507		tmod;tmod-RC	65		pointed-end actin filament capping [GO:0051694]";"myofibril assembly [GO:0030239];pointed-end actin filament capping [GO:0051694]	fusome [GO:0045169];fusome [GO:0045169]";myofibril [GO:0030016]";"cell cortex [GO:0005938]	tropomyosin binding [GO:0005523]";"actin binding [GO:0003779]	10	10	20.3	58.755	0	26.5	2051900000	40	1.17977	0.109025	0.354683	0.87184	0.848297	-1.60052	0.628005	-1.31715	2.50714	-1.88036	0.354683	0.87184	0.886057	2.47236
27.1175	29.915	28.2319	30.4722	27.6969	25.0715	30.0599	28.9468	NaN	30.2765	28.2997	25.4213	27.8588	NaN	28.5255	30.3476	30.0921	25.7702	27.8429	27.4196	NaN	Serine/threonine-protein phosphatase;Serine/threonine-protein phosphatase 2B catalytic subunit 1	CanA1	66		medium-term memory [GO:0072375];negative regulation of epidermal growth factor receptor signaling pathway [GO:0042059];neurotransmitter secretion [GO:0007269];protein dephosphorylation [GO:0006470];regulation of innate immune response [GO:0045088];response to nitric oxide [GO:0071731];sleep [GO:0030431];vesicle-mediated transport [GO:0016192]";"calcineurin-mediated signaling [GO:0097720]	cytoplasm [GO:0005737];synaptic vesicle [GO:0008021]";"calcineurin complex [GO:0005955]	calmodulin binding [GO:0005516];calmodulin-dependent protein phosphatase activity [GO:0033192];metal ion binding [GO:0046872];protein serine/threonine phosphatase activity [GO:0004722]";"calcium-dependent protein serine/threonine phosphatase activity [GO:0004723];phosphoprotein phosphatase activity [GO:0004721]	7	2	11.9	66.303	0.0038263	1.8663	6216100000	47	0.0761775	0.860919	0.114807	0.452942	0.217664	1.10539	0.126083	0.445122	1.05543	1.87213	0.114807	0.452942	0.166714	-0.652445
31.7343	31.4892	31.272	31.0584	31.2295	31.0984	30.8734	30.7695	30.6993	31.6106	31.6289	31.7384	31.5433	31.3185	31.3942	31.544	31.4081	31.2776	31.2003	31.0669	30.7443	Ectopic P granules protein 5 homolog	CG14299	67	+	autophagy [GO:0006914]";"autophagosome maturation [GO:0097352];autophagy [GO:0006914]	cytoplasm [GO:0005737]		79	79	35	280.56	0	323.31	31486000000	739	3.37692	0.010098	0.908928	0.309798	1.22529	0.406061	2.3682	0.535113	0.704597	-0.223141	0.908928	0.309798	0.244838	-0.0962636
28.3229	28.3472	28.0591	26.9981	27.332	26.113	22.418	28.1976	26.6095	25.3288	27.9764	26.7137	27.8297	27.0843	27.4994	28.6693	28.0681	28.0921	26.4123	27.2611	26.4104	Mediator of RNA polymerase II transcription subunit 31	MED31	68		negative regulation of neuroblast proliferation [GO:0007406];regulation of transcription by RNA polymerase II [GO:0006357];transcription initiation from RNA polymerase II promoter [GO:0006367]";"anterior/posterior axis specification, embryo [GO:0008595];regulation of transcription, DNA-templated [GO:0006355]	mediator complex [GO:0016592];nucleus [GO:0005634]";"core mediator complex [GO:0070847];mediator complex [GO:0016592]	transcription coactivator activity [GO:0003713];transcription coregulator activity [GO:0003712]	5	1	27.5	23.53	0	26.656	1667100000	45	0.680285	0.276138	0.745133	0.834156	1.99505	1.58196	0.254802	0.377465	0.211514	-0.952872	0.745133	0.834156	0.674939	-0.747805
27.9663	28.3212	29.4514	28.5147	28.6877	28.1885	27.2285	28.4875	28.2511	26.658	28.6142	25.6905	28.9652	26.4217	28.3095	28.01	28.3741	28.5666	28.2133	27.7745	24.0533		Calx	69		phototransduction [GO:0007602];response to endoplasmic reticulum stress [GO:0034976]";"neuromuscular process controlling posture [GO:0050884]	integral component of membrane [GO:0016021]	calcium ion binding [GO:0005509]";"calcium:sodium antiporter activity [GO:0005432]	9	9	10.3	106.23	0	125.37	3544400000	41	0.626343	0.310097	1.07099	1.84125	0.543876	1.63649	0.26772	0.762808	0.403266	1.30865	1.07099	1.84125	0.25734	0.204766
NaN	NaN	NaN	27.0031	NaN	NaN	NaN	NaN	27.2266	25.9698	25.9498	26.1709	27.1874	27.7066	28.0206	27.0507	26.8452	27.7214	25.5404	26.0314	26.0471	Calcium-binding mitochondrial carrier protein Aralar1	aralar1	71		L-glutamate transmembrane transport [GO:0015813];malate-aspartate shuttle [GO:0043490];mitochondrial transport [GO:0006839];wound healing [GO:0042060]";"aspartate transmembrane transport [GO:0015810]	mitochondrial inner membrane [GO:0005743];mitochondrion [GO:0005739]";"integral component of membrane [GO:0016021];integral component of membrane [GO:0016021]	identical protein binding [GO:0042802];L-aspartate transmembrane transporter activity [GO:0015183];L-glutamate transmembrane transporter activity [GO:0005313];transmembrane transporter activity [GO:0022857]";"calcium ion binding [GO:0005509]	54	2	75.5	78.332	0.0006942	3.4345	1123500000	18	0.92259	0.203637	0	1.13015	1.88597	1.33276	0.88208	0.961196	0	1.35366	0	1.13015	0	-0.202614
27.8051	26.3056	27.4595	NaN	25.9188	26.7764	NaN	NaN	NaN	25.9908	25.7742	NaN	25.1553	24.9649	24.9578	25.203	24.9237	NaN	27.5123	26.0474	NaN		alpha-Est5	72	+			carboxylic ester hydrolase activity [GO:0052689]	26	1	56	61.487	0	19.532	639350000	12	1.95656	0.034574	0.0357273	0.0732363	0.82994	-1.71655	1.35093	-1.41127	0	NaN	0.0357273	0.0732363	1.53659	1.78978
30.3003	31.1128	30.9888	30.2457	30.8004	30.3003	30.5351	31.2522	30.611	30.7024	31.2696	30.3953	30.747	30.7765	30.2655	31.1858	31.2084	31.3924	30.6215	30.9952	30.6251	Protein suppressor of hairy wing	su(Hw)	73		negative regulation of chromatin silencing [GO:0031936];negative regulation of transcription, DNA-templated [GO:0045892];response to ecdysone [GO:0035075];transcription, DNA-templated [GO:0006351]";"chromatin organization [GO:0006325]	nucleus [GO:0005634];polytene chromosome [GO:0005700]";"chromatin [GO:0000785]	DNA binding [GO:0003677];metal ion binding [GO:0046872];sequence-specific DNA binding [GO:0043565]";"chromatin insulator sequence binding [GO:0043035];nucleic acid binding [GO:0003676]	34	34	38	105.78	0	285.43	19949000000	394	0.837318	0.274621	0.198062	-0.122551	1.67126	0.514938	0.0887893	-0.0545327	0.0704564	0.0521577	0.198062	-0.122551	1.51261	-0.637488
25.7013	NaN	24.4287	NaN	NaN	NaN	22.4597	NaN	25.714	23.6237	23.5225	NaN	23.8116	NaN	23.453	NaN	NaN	NaN	25.1009	24.7922	24.201		wake	74		asymmetric stem cell division [GO:0098722];establishment of mitotic spindle orientation [GO:0000132];positive regulation of circadian sleep/wake cycle, sleep [GO:0045938];regulation of establishment of bipolar cell polarity [GO:0061172];signal transduction [GO:0007165]";"asymmetric neuroblast division [GO:0055059]	spindle [GO:0005819]";"centrosome [GO:0005813]	GABA receptor binding [GO:0050811]	9	3	6.8	171.06	0	10.187	201940000	10	0.457107	0.424675	0.240836	0.366982	0	NaN	2.22424	-1.09534	0.17994	-0.611195	0.240836	0.366982	0	NaN
31.232	29.7149	30.7034	30.288	30.2349	30.6281	30.5753	30.3676	30.5266	29.9999	30.6534	30.3915	30.1039	30.2014	30.2159	30.9708	30.8993	31.0227	30.3765	30.1071	30.0548	Protein gustavus	gus	75		dorsal appendage formation [GO:0046843];germ cell development [GO:0007281];intracellular signal transduction [GO:0035556];oocyte anterior/posterior axis specification [GO:0007314];pole cell migration [GO:0007280];pole plasm assembly [GO:0007315];positive regulation of protein catabolic process [GO:0045732];proteasome-mediated ubiquitin-dependent protein catabolic process [GO:0043161];protein loca…	Cul5-RING ubiquitin ligase complex [GO:0031466];cytoplasm [GO:0005737];elongin complex [GO:0070449];nucleus [GO:0005634];perinuclear region of cytoplasm [GO:0048471];pole plasm [GO:0045495];SCF ubiquitin ligase complex [GO:0019005]";"cell cortex [GO:0005938];intracellular [GO:0005622]	ubiquitin-protein transferase activity [GO:0004842]	14	14	57.7	31.712	0	315.08	16790000000	259	1.27012	0.140728	0.40884	0.287433	2.75252	0.784807	0.213787	0.0815398	1.23772	0.310381	0.40884	0.287433	0.823499	-0.497374
29.5197	30.2452	29.1331	29.0883	29.5976	29.7475	30.0549	29.6291	29.9001	30.4433	30.5192	30.3755	29.989	30.2721	29.9429	30.7337	30.0854	30.2227	30.2675	29.505	30.0911	CWF19-like protein 1 homolog	CG7741;CG7741-RB	76					27	27	65.6	59.852	0	223.28	12066000000	196	1.82938	0.0590754	0.657356	-0.399276	0.576593	0.392749	0.722243	0.302496	0.130718	-0.0931441	0.657356	-0.399276	1.55673	-0.792024
30.9221	31.1308	30.7436	30.505	30.6498	30.5326	31.4484	31.1242	31.2154	31.1143	30.8079	30.7207	30.6248	30.93	30.7694	30.2754	31.3997	29.5314	30.9609	30.509	30.5448	RING finger protein unkempt	unk	77		compound eye development [GO:0048749];imaginal disc-derived wing morphogenesis [GO:0007476];larval development [GO:0002164];neuron differentiation [GO:0030182];regulation of neurogenesis [GO:0050767]";"chaeta morphogenesis [GO:0008407]	cytoplasm [GO:0005737]	zinc ion binding [GO:0008270]";"DNA binding [GO:0003677];metal ion binding [GO:0046872]	28	1	56.1	68.442	0	323.31	17331000000	258	0.833408	0.263992	0.171155	0.0757643	0.18257	-0.269371	0.52035	0.156302	1.56135	0.591088	0.171155	0.0757643	0.399793	0.345135
30.9449	30.9595	30.3781	30.6865	30.9706	30.5681	30.4777	30.9052	30.8118	30.8121	30.6864	30.693	30.8205	30.5175	30.6274	31.0951	31.0254	31.0326	30.6916	30.9892	30.4452		pyd	78		branch fusion, open tracheal system [GO:0035147];cell-cell adhesion [GO:0098609];chaeta development [GO:0022416];compound eye morphogenesis [GO:0001745];dorsal closure [GO:0007391];establishment or maintenance of cell polarity [GO:0007163];fusion cell fate specification [GO:0035156];head involution [GO:0008258];JNK cascade [GO:0007254];nephrocyte diaphragm assembly [GO:0036059];Notch signaling pa…	apical part of cell [GO:0045177];axon [GO:0030424];basolateral plasma membrane [GO:0016323];cell cortex [GO:0005938];cell-cell adherens junction [GO:0005913];nephrocyte diaphragm [GO:0005917];plasma membrane [GO:0005886]";"adherens junction [GO:0005912]	guanylate kinase activity [GO:0004385];ubiquitin protein ligase binding [GO:0031625];WW domain binding [GO:0050699]";"cell adhesion molecule binding [GO:0050839]	73	13	32.4	263.84	0	323.31	21783000000	516	0.778798	0.371595	0.0863771	0.042647	1.01174	0.342375	0.0450508	-0.0158698	0.0380974	0.0228907	0.0863771	0.042647	1.07886	-0.299728
NaN	25.2695	25.3492	NaN	NaN	25.4515	25.1892	NaN	NaN	25.632	24.8847	23.9301	NaN	NaN	NaN	NaN	NaN	NaN	24.5582	24.9973	NaN	Segmentation protein capncollar	cnc	79		blastoderm segmentation [GO:0007350];dendrite morphogenesis [GO:0048813];determination of adult lifespan [GO:0008340];head development [GO:0060322];intestinal stem cell homeostasis [GO:0036335];oocyte dorsal/ventral axis specification [GO:0007310];oocyte microtubule cytoskeleton polarization [GO:0008103];oocyte nucleus localization involved in oocyte dorsal/ventral axis specification [GO:0051663]…	polytene chromosome puff [GO:0005703]";"nucleus [GO:0005634];nucleus [GO:0005634]	DNA-binding transcription factor activity [GO:0003700];DNA-binding transcription factor activity [GO:0003700]";protein heterodimerization activity [GO:0046982]";"DNA binding [GO:0003677]	3	3	5.3	121.05	0.0025164	2.1195	106060000	4	0.342607	0.556114	1.32908	0.578995	0	NaN	0.0188119	0.0378882	0	0.411455	1.32908	0.578995	0	NaN
27.4703	27.7304	25.9709	26.4868	26.032	26.8838	27.1002	26.9577	26.4108	27.3573	26.5541	27.31	27.6734	26.6592	25.8446	26.3076	26.3154	26.4171	25.6187	24.609	25.1124	Dystrobrevin	Dyb	80	+		dystrobrevin complex [GO:0016014];dystrophin-associated glycoprotein complex [GO:0016010]";"cytoplasm [GO:0005737];"dystrobrevin complex [GO:0016014]	structural constituent of muscle [GO:0008307];zinc ion binding [GO:0008270]";"cytoskeletal protein binding [GO:0008092]	12	12	23	68.237	0	78.698	1196500000	51	2.16613	0.0265431	1.97098	1.64902	1.86364	1.23335	2.29105	1.78643	2.04968	1.70956	1.97098	1.64902	0.425884	0.415675
30.5539	30.6477	30.31	30.5042	30.2546	30.6255	30.703	30.4543	30.4596	31.0121	30.6966	30.5223	30.7604	30.7972	30.7836	30.8579	30.9246	31.3416	30.5405	30.0835	29.9881	General transcription factor IIH subunit 1	Tfb1	82	+	phosphorylation of RNA polymerase II C-terminal domain [GO:0070816];promoter clearance from RNA polymerase II promoter [GO:0001111];response to UV [GO:0009411];transcription by RNA polymerase I [GO:0006360];transcription by RNA polymerase II [GO:0006366];transcription initiation from RNA polymerase II promoter [GO:0006367]";transcription, DNA-templated [GO:0006351]";transcriptional open complex f…	transcription factor TFIIH core complex [GO:0000439];transcription factor TFIIH holo complex [GO:0005675]";"nucleus [GO:0005634];transcription factor TFIIH core complex [GO:0000439]		42	42	61.7	66.339	0	323.31	19221000000	415	3.15129	0.0136787	0.987144	0.278638	1.67098	0.837382	2.1786	0.558039	0.820147	0.33498	0.987144	0.278638	2.28771	-0.558744
30.0445	29.7163	27.0908	29.2838	29.4728	29.8969	29.612	30.0946	29.5967	29.9319	29.7826	29.5927	29.6608	29.8149	29.6099	29.6849	30.1125	29.7731	28.4547	29.9341	29.8661	PTB domain-containing adapter protein ced-6	ced-6;ced-6-RC	83		mushroom body development [GO:0016319];neuron remodeling [GO:0016322]";"apoptotic cell clearance [GO:0043277]	cytoplasm [GO:0005737]		17	17	37.4	55.769	0	257.28	8950400000	179	0.184917	0.719187	0.0839916	-0.167435	0.366986	0.438543	0.435121	0.313835	0.275561	0.349478	0.0839916	-0.167435	0.410639	-0.605978
NaN	NaN	NaN	NaN	25.9127	NaN	NaN	26.2006	NaN	NaN	NaN	NaN	27.2909	NaN	NaN	NaN	25.7668	NaN	NaN	25.8566	NaN		mus210	84					5	1	15.8	35.317	0.0010195	2.5508	149690000	5	NaN	NaN	0	0.0560493	0	-0.0898819	0	1.43424	0	0.343922	0	0.0560493	0	0.145931
31.328	31.4717	31.1931	30.9945	31.0661	30.8942	30.8576	31.1099	30.7312	30.9579	31.1056	30.9512	30.7543	30.5909	30.4842	31.3161	30.9309	30.7214	30.909	30.9109	30.4705		Sin3A	85		epithelial cell migration [GO:0010631];histone deacetylation [GO:0016575];larval somatic muscle development [GO:0007526];negative regulation of canonical Wnt signaling pathway [GO:0090090];negative regulation of epithelial cell migration [GO:0010633];negative regulation of transcription by RNA polymerase II [GO:0000122];negative regulation of transcription, DNA-templated [GO:0045892];regulation o…	euchromatin [GO:0000791];nucleus [GO:0005634];polytene chromosome [GO:0005700];Sin3 complex [GO:0016580];Sin3-type complex [GO:0070822];transcriptional repressor complex [GO:0017053]";"chromatin [GO:0000785]	protein heterodimerization activity [GO:0046982];transcription coregulator activity [GO:0003712];transcription coregulator activity [GO:0003712]";transcription corepressor activity [GO:0003714]";"chromatin binding [GO:0003682]	60	60	31.6	220.36	0	323.31	23313000000	577	0.935678	0.270966	1.35738	0.394458	0.423785	0.225976	0.0935181	0.0438592	0.300477	0.136052	1.35738	0.394458	0.443059	0.168482
29.0603	28.7138	28.5341	28.533	28.7786	28.8107	29.5252	29.0616	28.9619	29.3455	28.3583	29.1042	29.0958	29.4312	29.421	28.8943	28.6822	27.5416	28.5156	28.7066	28.193		Abi	86		actin polymerization or depolymerization [GO:0008154];axon extension involved in axon guidance [GO:0048846];cell adhesion [GO:0007155];cell adhesion mediated by integrin [GO:0033627];cell morphogenesis [GO:0000902];cell projection assembly [GO:0030031];central nervous system neuron axonogenesis [GO:0021955];centripetally migrating follicle cell migration [GO:0060269];chaeta development [GO:002241…	basal cortex [GO:0045180];basal part of cell [GO:0045178];dendrite [GO:0030425];lamellipodium membrane [GO:0031258];neuronal cell body [GO:0043025];perinuclear region of cytoplasm [GO:0048471];protein-containing complex [GO:0032991];SCAR complex [GO:0031209]";"actin-based cell projection [GO:0098858];"basal part of cell [GO:0045178]	protein kinase binding [GO:0019901];protein N-terminus binding [GO:0047485];SH3 domain binding [GO:0017124]";"cadherin binding [GO:0045296];kinase activity [GO:0016301]	11	11	34.5	51.854	0	318.1	6279100000	105	1.41917	0.10222	0.900042	0.266656	0.0782631	-0.0990632	1.3914	0.654243	1.44164	0.711192	0.900042	0.266656	0.583028	0.365719
26.7776	27.0107	26.8244	27.9998	25.9631	25.8571	27.2233	25.6791	25.4478	28.0999	27.3095	25.2641	25.4108	25.7866	24.3283	24.3665	26.9322	23.5321	27.5363	26.9154	26.1563	Protein charlatan	chn	87		embryonic development via the syncytial blastoderm [GO:0001700];eye development [GO:0001654];larval somatic muscle development [GO:0007526];negative regulation of compound eye cone cell fate specification [GO:0042683];negative regulation of transcription by RNA polymerase II [GO:0000122];peripheral nervous system development [GO:0007422];positive regulation of transcription by RNA polymerase II […	nucleus [GO:0005634]	nucleic acid binding [GO:0003676]";proximal promoter DNA-binding transcription repressor activity, RNA polymerase II-specific [GO:0001078];sequence-specific DNA binding [GO:0043565];transcription factor activity, RNA polymerase II distal enhancer sequence-specific binding [GO:0003705]";"DNA-binding transcription factor activity, RNA polymerase II-specific [GO:0000981];"metal ion binding [GO:00468…	15	15	14.1	130.56	0	25.607	1085300000	45	0.582269	0.336331	0.0892442	-0.130528	0.811451	-1.92572	0.428443	-0.836102	0.476401	-0.752565	0.0892442	-0.130528	1.19488	1.79519
20.975	NaN	21.9684	NaN	24.2844	24.3255	23.8215	23.9015	25.1103	NaN	NaN	23.3538	25.2943	22.8352	22.0817	25.7685	NaN	26.0244	NaN	23.4512	23.6464			88			nucleus [GO:0005634]	DNA binding [GO:0003677]	3	3	25	20.624	0	21.559	187010000	10	0.857192	0.194959	0.201157	-0.660492	2.33111	2.34764	0.0526036	-0.157538	0.565341	0.728971	0.201157	-0.660492	1.11699	-3.00813
25.9723	24.5098	25.1522	26.1561	25.1308	24.5052	NaN	NaN	NaN	26.9839	26.9714	26.3267	25.4374	26.2027	25.8867	25.5452	26.5213	24.9024	23.1438	NaN	24.5076		Asph	89	+	peptidyl-aspartic acid hydroxylation [GO:0042264]	integral component of membrane [GO:0016021]";"endomembrane system [GO:0012505]	peptide-aspartate beta-dioxygenase activity [GO:0004597]	7	7	9.6	89.843	0	18.208	625040000	31	2.21023	0.0243056	1.21275	1.41204	0.983193	1.83059	2.36812	2.47576	0	NaN	1.21275	1.41204	0.34871	-0.418552
27.5448	27.2256	27.358	28.2246	27.5367	25.7228	28.1555	27.4943	26.9088	28.134	28.2136	27.1935	28.256	NaN	23.8823	27.2061	26.7722	NaN	27.5568	27.9562	27.5906			92		inositol phosphate dephosphorylation [GO:0046855];phosphatidylinositol dephosphorylation [GO:0046856];positive regulation of flagellated sperm motility [GO:1902093]";"dephosphorylation [GO:0016311]	cytoplasm [GO:0005737];dendrite [GO:0030425];neuronal cell body [GO:0043025];non-motile cilium [GO:0097730];nucleus [GO:0005634];plasma membrane [GO:0005886];ruffle [GO:0001726]";"axon [GO:0030424]	inositol trisphosphate phosphatase activity [GO:0046030]	10	10	27	39.668	0	49.311	1752300000	81	0.0250575	0.954023	0.377259	-0.432422	1.26698	-0.712052	0.19956	-0.565299	0.180887	-0.18163	0.377259	-0.432422	0.172632	0.27963
32.9827	32.7279	33.266	32.5755	32.265	32.5509	32.5169	32.2528	32.5674	33.0357	32.5389	33.056	32.4088	32.521	32.7949	33.1763	32.8795	32.9857	32.7262	32.581	32.7122		CG5174-RA	93					19	4	88.3	24.205	0	323.31	84788000000	428	0.723997	0.357413	0.0945785	0.0548579	1.58951	0.340701	0.116859	0.0527496	0.987634	-0.227444	0.0945785	0.0548579	0.634218	-0.285843
33.3415	33.8968	34.0426	33.9605	34.0754	34.3198	33.1278	33.318	33.6544	33.9779	34.1558	34.0628	34.1404	34.2608	34.0088	34.0099	33.8214	33.9974	34.534	34.5939	34.6542	DNA-binding protein modulo	mod	94	+	cell proliferation [GO:0008283]	nucleolus [GO:0005730];nucleus [GO:0005634];protein-containing complex [GO:0032991]";"cytoplasm [GO:0005737]	mRNA binding [GO:0003729];sequence-specific DNA binding [GO:0043565]";"DNA binding [GO:0003677];RNA binding [GO:0003723]	37	37	60.9	60.309	0	323.31	204900000000	1233	4.05122	0.00361165	1.90015	-0.654573	3.12736	-0.651131	3.81891	-0.492928	2.8314	-1.22731	1.90015	-0.654573	0.00581514	-0.00344213
NaN	NaN	NaN	NaN	NaN	NaN	NaN	NaN	NaN	NaN	NaN	NaN	NaN	NaN	NaN	NaN	NaN	NaN	23.8599	NaN	NaN		Nurf-38	95		phosphate-containing compound metabolic process [GO:0006796]	cytoplasm [GO:0005737]	magnesium ion binding [GO:0000287]";"inorganic diphosphatase activity [GO:0004427]	30	1	94.1	32.536	0.00068882	3.1152	16561000	1	NaN	NaN	0	NaN	0	NaN	0	NaN	0	NaN	0	NaN	-4.34294e-08	0
28.9944	28.0606	28.3277	27.4977	26.1073	26.476	27.2412	27.2607	26.5638	27.49	28.7315	27.9028	26.9731	27.58	28.5324	26.4384	27.5674	27.5869	27.427	26.5736	26.6103		l(2)k14710	96		protein localization to plasma membrane [GO:0072659]";"phosphatidylinositol phosphorylation [GO:0046854]	plasma membrane [GO:0005886]		22	22	29.7	94.532	0	75.419	2931200000	78	0.432152	0.460488	0.469615	0.706961	0.279603	0.327262	1.24738	0.997989	0.157437	0.151559	0.469615	0.706961	0.215272	0.3797
35.871	35.939	36.2179	35.8249	35.7844	35.9199	35.9711	35.9925	36.1837	35.7737	35.7933	35.8473	35.9263	36.1872	36.0008	35.9039	35.7825	36.1409	35.9462	35.8107	35.9195		Nup358	97		mRNA transport [GO:0051028];NLS-bearing protein import into nucleus [GO:0006607];positive regulation of cell proliferation [GO:0008284];positive regulation of gene expression [GO:0010628];positive regulation of GTPase activity [GO:0043547];positive regulation of protein localization to nucleus [GO:1900182];positive regulation of RNA export from nucleus [GO:0046833];protein import into nucleus [GO…	cytoplasm [GO:0005737];nuclear pore [GO:0005643];nucleus [GO:0005634]";"centrosome [GO:0005813]	Ran GTPase binding [GO:0008536];transferase activity [GO:0016740]";"metal ion binding [GO:0046872]	140	140	55.4	296.38	0	323.31	747080000000	3951	0.146821	0.871958	0.134796	0.0340633	0.16787	0.0503146	0.113134	0.0293102	0.925512	0.156985	0.134796	0.0340633	0.0498258	-0.0162512
28.4201	28.8378	28.7855	28.7124	28.3791	28.5932	28.7797	29.0534	28.2323	29.5198	28.8945	28.0467	29.4657	29.4653	28.9514	29.2468	28.8016	28.8068	28.4774	28.5002	28.5281	Receptor protein serine/threonine kinase	sax	98		activin receptor signaling pathway [GO:0032924];anterior/posterior pattern specification, imaginal disc [GO:0007448];BMP signaling pathway [GO:0030509];chorion-containing eggshell formation [GO:0007304];compound eye morphogenesis [GO:0001745];decapentaplegic signaling pathway [GO:0008101];defense response to Gram-negative bacterium [GO:0050829];dorsal/ventral pattern formation [GO:0009953];germ-l…	integral component of plasma membrane [GO:0005887];plasma membrane [GO:0005886];plasma membrane [GO:0005886]";receptor complex [GO:0043235]";"activin receptor complex [GO:0048179];"integral component of plasma membrane [GO:0005887]	ATP binding [GO:0005524];BMP receptor activity [GO:0098821];growth factor binding [GO:0019838];metal ion binding [GO:0046872];protein kinase activity [GO:0004672];SMAD binding [GO:0046332];transforming growth factor beta receptor activity, type I [GO:0005025]";transforming growth factor beta-activated receptor activity [GO:0005024];"activin binding [GO:0048185];"ATP binding [GO:0005524]	13	13	29.7	60.091	0	156.97	5046900000	112	0.694447	0.335788	0.479646	0.119425	1.41311	0.449828	0.837843	0.555327	0.315634	0.186552	0.479646	0.119425	1.20261	-0.330403
30.5129	30.6459	30.9049	30.5867	29.8645	31.1276	30.9987	31.3349	31.8029	30.4281	30.5397	30.9913	31.0244	31.0348	31.0517	30.691	30.309	31.7045	31.3188	31.0754	30.9567	Protein HGH1 homolog	CG6073	99					21	21	58	41.799	0	323.31	22630000000	250	0.833532	0.258174	1.01457	-0.509895	0.192169	-0.215494	0.744181	-0.271986	0.437838	0.261829	1.01457	-0.509895	0.339678	-0.294401
28.604	27.5777	28.2831	28.5291	26.8429	27.9725	27.7572	27.621	27.7974	28.0809	28.381	27.9534	27.253	28.0291	28.0943	28.0518	27.2528	28.0032	27.3393	27.6214	28.1083	Putative phosphatidate phosphatase	wun	100		dephosphorylation [GO:0016311];ectopic germ cell programmed cell death [GO:0035234];embryonic pattern specification [GO:0009880];germ cell migration [GO:0008354];germ cell repulsion [GO:0035233];negative regulation of innate immune response [GO:0045824];open tracheal system development [GO:0007424];phospholipid dephosphorylation [GO:0046839];phospholipid metabolic process [GO:0006644];pole cell m…	integral component of plasma membrane [GO:0005887];septate junction [GO:0005918]";"apical part of cell [GO:0045177]	phosphatase activity [GO:0016791];phosphatidate phosphatase activity [GO:0008195];protein homodimerization activity [GO:0042803]";"lipid phosphatase activity [GO:0042577];phosphatidate phosphatase activity [GO:0008195]	3	3	14.8	41.276	0	39.055	3215600000	60	0.0685465	0.895224	0.272461	0.278542	0.0821522	0.0795975	0.467849	0.275613	0.0530035	0.0355396	0.272461	0.278542	0.180043	0.198944
32.9567	32.6634	33.0046	32.9856	32.5887	32.8515	32.8165	32.6683	32.7789	32.7799	32.7384	32.9059	32.8958	32.9715	32.7802	32.4752	32.5263	32.7092	32.9622	32.7969	32.6273		rad50	101		telomere maintenance [GO:0000723]";"DNA repair [GO:0006281]	Mre11 complex [GO:0030870]	metal ion binding [GO:0046872]";"ATPase activity [GO:0016887]	97	1	60.8	152.13	0	323.31	85498000000	1248	1.05922	0.314158	0.143685	0.0462735	0.873797	-0.225224	0.243714	0.0498352	0.142377	-0.0408783	0.143685	0.0462735	1.29264	0.271497
25.863	27.4597	25.1393	27.355	25.9142	24.6506	25.8056	26.8469	26.2258	27.7701	27.0987	26.7823	26.8443	25.228	24.9257	26.6158	27.8646	26.8749	26.9264	27.3163	24.874		p53	102		apoptotic process [GO:0006915];cell death [GO:0008219];cellular response to DNA damage stimulus [GO:0006974];cellular response to gamma radiation [GO:0071480];cellular response to starvation [GO:0009267];determination of adult lifespan [GO:0008340];DNA damage response, signal transduction by p53 class mediator [GO:0030330];ectopic germ cell programmed cell death [GO:0035234];intrinsic apoptotic s…	nucleus [GO:0005634]	promoter-specific chromatin binding [GO:1990841];RNA polymerase II transcription factor binding [GO:0001085];TFIIH-class transcription factor complex binding [GO:0001097];transcription factor binding [GO:0008134];transcription regulatory region sequence-specific DNA binding [GO:0000976];ubiquitin conjugating enzyme binding [GO:0031624];ubiquitin protein ligase binding [GO:0031625]";"DNA-binding t…	11	11	33.8	38.185	0	23.817	1154700000	53	0.139526	0.770786	0.139397	-0.308596	0.368126	0.746223	0.0287522	0.0693038	0.0328785	-0.0794512	0.139397	-0.308596	0.721071	-1.05482
27.9801	27.3428	26.7756	26.6116	27.8684	27.1285	27.3116	28.2088	27.0797	27.3914	26.8214	24.6123	26.1781	24.6055	26.6109	NaN	27.8733	24.6821	28.7007	28.9971	28.3692		mbc	103	+	activation of GTPase activity [GO:0090630];anterior Malpighian tubule development [GO:0061327];border follicle cell migration [GO:0007298];cell competition in a multicellular organism [GO:0035212];cell morphogenesis [GO:0000902];central nervous system development [GO:0007417];cytoskeleton organization [GO:0007010];dorsal closure [GO:0007391];imaginal disc fusion, thorax closure [GO:0046529];larva…	extrinsic component of plasma membrane [GO:0019897];ruffle [GO:0001726]";"cytoplasm [GO:0005737]	Rac guanyl-nucleotide exchange factor activity [GO:0030676]	22	22	11.3	230.67	0	15.388	2293100000	58	1.77752	0.0422098	2.26239	-1.40453	0.851495	-2.41133	2.13381	-2.6524	1.38564	-1.15568	2.26239	-1.40453	0.543489	1.00679
31.3051	31.5365	30.8978	30.8659	31.4589	30.7325	30.4374	30.6374	30.4332	31.6874	31.0929	30.9347	30.9069	30.0189	30.4375	31.0377	30.7039	30.1287	31.249	30.7294	31.5489	Signal peptidase complex subunit 3	Spase22-23	104		signal peptide processing [GO:0006465]";"protein targeting to ER [GO:0045047];signal peptide processing [GO:0006465]	organelle membrane [GO:0031090];signal peptidase complex [GO:0005787]";"integral component of membrane [GO:0016021]	peptidase activity [GO:0008233]	9	9	36.9	20.304	0	70.744	21924000000	228	0.696482	0.321224	0.0593662	-0.0429843	0.705129	-0.552371	0.38765	-0.329406	1.26985	-0.673124	0.0593662	-0.0429843	1.00204	0.509386
29.1804	30.1054	29.0153	28.8026	29.5856	28.1356	28.6132	29.1757	27.6206	28.799	28.9045	27.3243	29.726	28.285	28.243	29.6891	30.1706	28.9835	28.5722	29.2943	28.5522	Myeloid leukemia factor	Mlf	105		positive regulation of crystal cell differentiation [GO:0042691];protein stabilization [GO:0050821];regulation of cell proliferation involved in compound eye morphogenesis [GO:2000495];regulation of transcription, DNA-templated [GO:0006355]";"negative regulation of Notch signaling pathway [GO:0045746]	nucleus [GO:0005634];perinuclear region of cytoplasm [GO:0048471];polytene chromosome interband [GO:0005705]";"cytoplasm [GO:0005737]	DNA binding [GO:0003677];transcription factor binding [GO:0008134]";"chaperone binding [GO:0051087]	7	1	26.3	34.554	0	142.47	6372900000	112	0.669966	0.30686	0.328347	0.331249	0.891974	0.808175	0.204351	-0.259242	0.259636	-0.3364	0.328347	0.331249	0.473792	-0.476926
29.0628	29.732	29.0694	29.2172	29.7246	29.1891	29.3308	30.0503	29.5534	29.1323	29.7813	28.4801	29.4825	28.2695	28.4947	28.4886	29.8652	28.6518	29.2287	30.3302	28.9382	Protein crumbs	crb	106		amnioserosa maintenance [GO:0046665];apical constriction [GO:0003383];apical protein localization [GO:0045176];assembly of apicomedial cortex actomyosin [GO:0106036];cell division [GO:0051301];cell morphogenesis involved in Malpighian tubule morphogenesis [GO:0061336];centrosome localization [GO:0051642];compound eye morphogenesis [GO:0001745];compound eye photoreceptor development [GO:0042051];d…	apicolateral plasma membrane [GO:0016327];cytoplasm [GO:0005737];integral component of membrane [GO:0016021];plasma membrane [GO:0005886];rhabdomere [GO:0016028];spindle [GO:0005819];subapical complex [GO:0035003]";"apical plasma membrane [GO:0016324];integral component of membrane [GO:0016021]	protein kinase C binding [GO:0005080];spectrin binding [GO:0030507]";"calcium ion binding [GO:0005509];calcium ion binding [GO:0005509]	28	28	15.4	240.46	0	92.004	7100600000	171	0.454694	0.463015	0.197923	-0.166527	0.338514	-0.497167	0.577147	-0.558964	0.111318	0.145792	0.197923	-0.166527	0.439498	0.33064
34.3167	34.3065	34.3522	34.1957	34.2642	34.0592	33.9634	33.8627	33.933	34.4586	34.5471	34.4516	33.9941	34.2301	34.21	34.1883	34.1231	34.1233	34.2396	33.9918	33.8425	Ubiquitin carboxyl-terminal hydrolase;Probable ubiquitin carboxyl-terminal hydrolase FAF	faf	107		defense response to Gram-negative bacterium [GO:0050829];dorsal/ventral axis specification [GO:0009950];endocytosis [GO:0006897];germ cell migration [GO:0008354];mystery cell differentiation [GO:0008583];negative regulation of innate immune response [GO:0045824];negative regulation of proteolysis [GO:0045861];nuclear cortical migration [GO:0035192];oogenesis [GO:0048477];protein deubiquitination …	cytoplasm [GO:0005737]	thiol-dependent ubiquitin-specific protease activity [GO:0004843]";"cysteine-type endopeptidase activity [GO:0004197];thiol-dependent ubiquitinyl hydrolase activity [GO:0036459]	151	151	59.1	310.59	0	323.31	225830000000	2810	1.94632	0.0926609	1.23438	0.224473	0.437713	0.120272	1.06929	0.290649	0.366945	-0.10496	1.23438	0.224473	0.804665	0.104201
27.3841	27.925	27.8966	28.2319	28.1524	27.8088	28.7309	27.2098	28.0415	28.2029	28.1644	27.6179	28.4359	26.9963	27.7784	27.4005	27.9702	26.7226	27.3821	26.8231	26.7647	Putative serine/threonine-protein kinase STE20-like	Stlk	108		MAPK cascade [GO:0000165];neuron projection morphogenesis [GO:0048812];signal transduction by protein phosphorylation [GO:0023014];stress-activated protein kinase signaling cascade [GO:0031098]";"activation of protein kinase activity [GO:0032147]	nucleus [GO:0005634]";"cytoplasm [GO:0005737]	kinase activity [GO:0016301]";protein kinase activity [GO:0004672]";"ATP binding [GO:0005524]	16	16	37	39.895	0	85.266	2864300000	80	1.09023	0.15896	2.35299	0.909809	0.383423	0.374451	1.45263	0.875966	0.976665	1.00411	2.35299	0.909809	0.944042	0.535358
31.4859	31.4743	31.6172	31.7017	32.0118	31.4542	31.5193	32.0357	31.6249	31.8533	31.926	31.6931	31.9684	31.1831	31.4261	30.4243	31.5942	30.6189	31.5284	31.9444	31.2671		RhoGEF2	109		actin filament organization [GO:0007015];actin-mediated cell contraction [GO:0070252];anterior midgut invagination [GO:0007375];apical constriction involved in gastrulation [GO:0003384];cell elongation involved in imaginal disc-derived wing morphogenesis [GO:0090254];cellularization [GO:0007349];germ-band extension [GO:0007377];intracellular signal transduction [GO:0035556];morphogenesis of embry…	actomyosin contractile ring [GO:0005826];apical cortex [GO:0045179];apical part of cell [GO:0045177];apical plasma membrane [GO:0016324];basal part of cell [GO:0045178];lateral plasma membrane [GO:0016328]";"actin cap [GO:0030478]	Rho guanyl-nucleotide exchange factor activity [GO:0005089]";"metal ion binding [GO:0046872]	75	75	32.1	280.55	0	323.31	30581000000	555	1.44392	0.103902	0.0892737	0.0442467	0.784376	-0.700804	0.162803	0.0950527	0.227434	0.146676	0.0892737	0.0442467	1.55778	0.745051
30.8068	30.7012	31.0279	30.8068	30.3884	29.9829	30.4162	30.5905	30.4026	31.0036	30.9228	31.2607	30.9043	30.6759	30.3383	31.1464	30.6534	30.9935	30.6988	30.2644	30.4433	[Pyruvate dehydrogenase (acetyl-transferring)] kinase, mitochondrial	Pdk	110		pyruvate metabolic process [GO:0006090]";"glucose metabolic process [GO:0006006]	mitochondrial matrix [GO:0005759]	protein kinase activity [GO:0004672];pyruvate dehydrogenase (acetyl-transferring) kinase activity [GO:0004740]";"ATP binding [GO:0005524];pyruvate dehydrogenase (acetyl-transferring) kinase activity [GO:0004740]	22	22	69.5	46.626	0	323.31	21027000000	348	0.754735	0.326618	0.260262	0.15017	1.1286	0.462296	0.980826	0.382099	0.00221721	0.000949224	0.260262	0.15017	0.618727	-0.312126
30.8993	31.2759	31.9242	30.99	31.006	31.402	30.9693	30.4891	31.5868	31.5873	30.6206	30.5279	30.3719	28.9839	31.2584	31.7556	31.419	31.8868	30.6838	30.2059	30.8562		Glycogenin	111		glycogen biosynthetic process [GO:0005978]	cytosol [GO:0005829]	UDP-alpha-D-glucose:glucosyl-glycogenin alpha-D-glucosyltransferase activity [GO:0102751]";"glycogenin glucosyltransferase activity [GO:0008466]	17	17	45	61.747	0	323.31	25552000000	280	1.04185	0.163861	1.42265	0.667613	2.0051	1.10516	0.0145109	-0.0236441	0.509205	0.433093	1.42265	0.667613	0.927766	-0.437545
26.953	27.0846	27.3445	28.3144	28.3708	27.614	27.5628	29.2123	27.9216	28.4867	29.5211	28.9981	27.381	28.2799	27.7214	NaN	28.0183	28.4449	28.3527	28.693	27.7834		bbc	112		phosphatidylethanolamine biosynthetic process [GO:0006646];phospholipid biosynthetic process [GO:0008654]	Golgi apparatus [GO:0005794];integral component of membrane [GO:0016021]";"endoplasmic reticulum membrane [GO:0005789];integral component of membrane [GO:0016021]	ethanolaminephosphotransferase activity [GO:0004307];phosphotransferase activity, for other substituted phosphate groups [GO:0016780]";"diacylglycerol cholinephosphotransferase activity [GO:0004142];ethanolaminephosphotransferase activity [GO:0004307]	5	5	11.5	41.613	0	70.664	3457400000	68	0.42622	0.469781	0.841169	-0.662823	0.0394768	-0.0447744	0.08821	0.121675	0.0260943	-0.0441259	0.841169	-0.662823	0.634708	-0.618049
34.128	34.1381	34.3578	33.6297	33.8757	33.793	33.9863	34.2026	34.13	33.7989	33.9023	33.9362	34.1769	34.1106	34.0172	34.2351	34.0725	34.3002	33.5052	33.9383	33.5967	La-related protein 1	larp	113		mitochondrion inheritance [GO:0000001];spindle assembly involved in male meiosis [GO:0007053];syncytial blastoderm mitotic cell cycle [GO:0035186]";"male meiotic nuclear division [GO:0007140]	cytosol [GO:0005829];mitochondrion [GO:0005739]";"cytoplasm [GO:0005737]	RNA binding [GO:0003723]	95	95	63.8	178.14	0	323.31	186730000000	1502	1.31483	0.174716	0.869927	0.306992	1.61416	0.522509	1.44195	0.310291	1.36092	0.426212	0.869927	0.306992	0.628755	-0.215518
35.6547	35.4349	35.6008	35.6711	35.3122	35.4614	35.6789	35.5827	35.7494	35.5076	35.1823	35.5063	35.6062	35.8531	35.5917	34.981	34.8466	35.3756	35.1647	35.2003	35.38	26S proteasome non-ATPase regulatory subunit 11	Rpn6	114	+	proteasome-mediated ubiquitin-dependent protein catabolic process [GO:0043161];ubiquitin-dependent protein catabolic process [GO:0006511]";"proteasome assembly [GO:0043248];proteasome assembly [GO:0043248]	nucleoplasm [GO:0005654];proteasome complex [GO:0000502];proteasome regulatory particle [GO:0005838];proteasome regulatory particle, lid subcomplex [GO:0008541]";"cytosol [GO:0005829]	structural molecule activity [GO:0005198]	48	48	83.2	47.263	0	323.31	611650000000	2577	2.40624	0.041092	1.61878	0.274175	0.451815	-0.180611	1.15803	0.292861	2.16472	0.422017	1.61878	0.274175	1.9334	0.454786
NaN	NaN	NaN	NaN	NaN	NaN	26.4387	26.5656	26.4328	25.1182	25.0922	NaN	NaN	26.7515	26.7624	NaN	NaN	NaN	NaN	NaN	NaN		Mlf	115					7	1	27.8	32.118	0.0006924	3.313	357720000	8	0.423696	0.487208	-4.34294e-08	0	-4.34294e-08	0	0	NaN	0	NaN	-4.34294e-08	0	-4.34294e-08	0
22.752	NaN	NaN	22.1178	NaN	NaN	23.3257	NaN	NaN	22.3378	NaN	NaN	NaN	NaN	NaN	NaN	NaN	NaN	NaN	NaN	NaN			116		positive regulation of transcription by RNA polymerase II [GO:0045944]	nucleus [GO:0005634]	nucleic acid binding [GO:0003676]	3	3	6.2	54.643	0.00085251	2.6388	33569000	6	NaN	NaN	0	NaN	-4.34294e-08	0	0	NaN	0	NaN	0	NaN	0	NaN
33.1012	33.1302	33.0582	33.1382	33.1656	33.0031	32.5508	32.4373	32.4576	33.0981	32.9741	33.0496	32.7715	33.009	32.827	32.6398	32.6123	32.6794	32.8652	32.9348	32.9197	Lissencephaly-1 homolog	Lis-1	117	+	axonal transport [GO:0098930];border follicle cell migration [GO:0007298];brain morphogenesis [GO:0048854];centrosome localization [GO:0051642];centrosome separation [GO:0051299];chorion-containing eggshell pattern formation [GO:0030381];clathrin-dependent endocytosis involved in vitellogenesis [GO:0061883];cytoplasmic transport, nurse cell to oocyte [GO:0007303];dendrite development [GO:0016358]…	axon cytoplasm [GO:1904115];cell cortex [GO:0005938];centrosome [GO:0005813];condensed chromosome kinetochore [GO:0000777];cytoplasmic microtubule [GO:0005881];cytosol [GO:0005829];dendrite [GO:0030425];dynactin complex [GO:0005869];dynein complex [GO:0030286];growth cone [GO:0030426];kinetochore [GO:0000776];kinetochore microtubule [GO:0005828];microtubule [GO:0005874];microtubule associated com…	dynein complex binding [GO:0070840];hydrolase activity [GO:0016787]";microtubule plus-end binding [GO:0051010]";"ATPase activity, coupled [GO:0042623];"dynein complex binding [GO:0070840]	36	36	78.8	46.459	0	323.31	91558000000	908	6.93557	0.000666667	2.82553	0.192862	3.09929	-0.262751	0.254924	0.0482953	3.31587	-0.424695	2.82553	0.192862	5.20319	0.455613
31.137	30.4292	30.8826	30.2961	30.2738	30.8755	31.3066	30.8261	31.4449	30.8831	31.1457	31.4429	30.474	30.5922	30.4581	30.5201	30.4791	30.3476	31.0739	30.2171	30.7805	Calcineurin subunit B type 2;Calcineurin subunit B type 1	CanB2;CanB	118		neurotransmitter secretion [GO:0007269];protein dephosphorylation [GO:0006470];sarcomere organization [GO:0045214];skeletal muscle myosin thick filament assembly [GO:0030241];sleep [GO:0030431];vesicle-mediated transport [GO:0016192]";"meiotic cell cycle [GO:0051321];"neurotransmitter secretion [GO:0007269]	synaptic vesicle [GO:0008021]";"calcineurin complex [GO:0005955]	calcium ion binding [GO:0005509];calmodulin binding [GO:0005516]";phosphoprotein phosphatase activity [GO:0004721]";"calcium ion binding [GO:0005509];"calcium-dependent protein serine/threonine phosphatase regulator activity [GO:0008597]	14	14	75.3	19.267	0	323.31	27085000000	327	0.788631	0.292846	0.0539492	-0.0414705	0.397891	-0.241554	0.194358	0.142156	0.733482	0.502005	0.0539492	-0.0414705	0.406598	0.200083
31.9638	32.0514	31.8536	31.5285	31.4197	31.6711	31.1898	31.3112	31.2601	32.1139	31.649	31.9379	31.6555	31.6983	31.5597	31.7109	31.8078	31.7366	31.6836	31.6391	31.4769			119		protein import into nucleus [GO:0006606]";"nuclear pore organization [GO:0006999];nuclear pore organization [GO:0006999]	nuclear pore inner ring [GO:0044611]	structural constituent of nuclear pore [GO:0017056]	63	63	38.9	213.61	0	323.31	39814000000	666	1.91616	0.0774087	0.431381	0.148137	1.03122	0.151925	0.613367	0.169209	2.06573	-0.34617	0.431381	0.148137	0.00850535	-0.00378863
33.8517	34.0164	33.9551	33.3221	33.7278	33.4716	33.8603	34.0852	34.0331	33.6777	33.6192	33.7144	33.7414	33.707	33.6858	33.5479	33.6854	33.8373	33.6431	33.9337	33.747	Centrosomin	cnn	120		asymmetric neuroblast division [GO:0055059];central nervous system development [GO:0007417];centriole replication [GO:0007099];centrosome cycle [GO:0007098];embryonic cleavage [GO:0040016];female meiosis chromosome segregation [GO:0016321];intraciliary transport [GO:0042073];microtubule-based process [GO:0007017];midgut development [GO:0007494];non-motile cilium assembly [GO:1905515];peripheral n…	centrosome [GO:0005813];ciliary basal body [GO:0036064];ciliary base [GO:0097546];cilium [GO:0005929];intraciliary transport particle [GO:0030990];intraciliary transport particle B [GO:0030992];microtubule associated complex [GO:0005875];motile cilium [GO:0031514];non-motile cilium [GO:0097730]";pericentriolar material [GO:0000242];spindle pole [GO:0000922]";"centriole [GO:0005814];microtubule or…	kinesin binding [GO:0019894];microtubule binding [GO:0008017]	75	60	53.9	155.75	0	323.31	159590000000	1421	0.702511	0.430304	0.107821	-0.0504704	0.285535	-0.0843773	0.672943	-0.0836824	0.937711	0.218254	0.107821	-0.0504704	0.0701895	0.0339069
30.2415	30.4067	30.8744	29.0465	30.0808	29.5671	29.7251	30.2543	29.7984	29.4125	30.053	29.5739	30.9653	30.4034	30.3769	29.8606	30.838	29.7862	29.451	30.0383	29.4371	Protein N-terminal glutamine amidohydrolase	tun	121		cellular protein modification process [GO:0006464]	nucleus [GO:0005634]";"cytosol [GO:0005829]	hydrolase activity, acting on carbon-nitrogen (but not peptide) bonds, in linear amides [GO:0016811];protein-N-terminal glutamine amidohydrolase activity [GO:0070773]	13	13	65.9	24.006	0	119.98	12199000000	144	0.127406	0.80869	0.437436	0.394028	0.591277	0.519475	0.645581	0.488701	0.477139	0.283815	0.437436	0.394028	0.104478	-0.125447
27.7095	26.8808	27.5973	26.4003	26.5254	26.9207	26.9952	26.5777	26.2801	27.076	27.1937	27.5147	27.3648	NaN	27.4092	26.302	27.1396	27.8997	27.1948	26.4586	27.4319	Protein painting of fourth	Pof	122		positive regulation of gene expression [GO:0010628]	chromosome [GO:0005694];nucleus [GO:0005634];polytene chromosome [GO:0005700]";"autosome [GO:0030849]	mRNA binding [GO:0003729];RNA binding [GO:0003723]";"chromatin binding [GO:0003682];RNA binding [GO:0003723]	9	9	22.6	55.103	0	28.049	1517800000	52	0.337637	0.571334	0.0207106	-0.0227636	0.0537845	0.0853182	0.554005	0.283268	0.499802	-0.410742	0.0207106	-0.0227636	0.0893313	-0.108082
28.7823	30.1671	28.0406	29.7981	29.8205	28.5403	29.8229	29.9364	29.4352	28.4539	28.8533	29.0705	30.1731	29.3167	29.6628	29.182	29.7305	29.7198	30.0478	29.5419	29.4795		key	123				K63-linked polyubiquitin modification-dependent protein binding [GO:0070530]	24	3	66.8	44.133	0	92.444	7568200000	175	0.21278	0.689955	0.429145	-0.498245	0.222656	-0.145622	0.533487	-0.434691	0.0615597	0.0417442	0.429145	-0.498245	0.282552	-0.352623
33.2119	33.2486	32.7485	32.6757	32.3551	32.3296	32.5078	32.9693	32.5979	32.8604	32.7379	32.9468	32.7132	32.3955	32.6526	32.3854	32.9856	32.823	32.7341	32.7967	32.3798			124		regulation of translational initiation [GO:0006446]		translation activator activity [GO:0008494]";"RNA binding [GO:0003723]	18	18	38.7	58.357	0	323.31	78404000000	499	0.00788141	0.992628	0.195154	0.124674	0.160265	0.0944735	0.23145	0.0808709	0.10278	0.0548045	0.195154	0.124674	0.0395967	0.030201
31.5545	31.6096	31.5405	31.2305	31.2921	31.4198	31.3729	31.2404	31.0608	32.0436	31.8807	31.8029	31.6793	31.6458	31.4244	31.7486	31.3594	31.5561	31.4268	31.0341	31.1873	Protein mahjong	mahj	125	+	protein ubiquitination [GO:0016567]";"cell competition in a multicellular organism [GO:0035212];protein ubiquitination [GO:0016567]	nucleus [GO:0005634]";"Cul4-RING E3 ubiquitin ligase complex [GO:0080008]		53	53	38.9	172.08	0	323.31	35990000000	578	2.49339	0.0358455	1.00353	0.225114	0.990887	0.338646	2.04945	0.530059	0.0197705	0.00865364	1.00353	0.225114	0.435542	-0.113532
25.7366	25.8324	25.6325	24.5707	26.6016	NaN	25.2523	25.3612	NaN	26.5728	25.3572	24.8291	26.0404	25.753	24.8054	NaN	NaN	NaN	25.3393	25.8971	NaN			126					6	6	4.7	150.45	0.006405	1.4931	315440000	11	0.034115	0.942972	0.0343888	0.0565668	0	NaN	0.0377605	-0.0585429	0.411762	-0.311458	0.0343888	0.0565668	0	NaN
29.1974	28.5118	28.3475	28.0404	27.9869	28.0161	25.6087	27.4826	25.7009	29.3674	28.1089	27.991	28.0386	28.0036	28.6053	28.7225	28.6121	26.3715	28.5048	27.568	26.8855			127	+	regulation of GTPase activity [GO:0043087]";"ER to Golgi vesicle-mediated transport [GO:0006888]	endoplasmic reticulum membrane [GO:0005789];integral component of membrane [GO:0016021]";"endoplasmic reticulum [GO:0005783]	Rab GTPase binding [GO:0017137]";"GTPase activator activity [GO:0005096]	13	13	31.3	43.107	0	94.391	3747000000	100	1.86662	0.0394393	0.865096	0.69723	0.0995465	0.249262	0.786874	0.699691	0.837247	-1.38872	0.865096	0.69723	0.336982	0.447968
30.1128	29.6058	29.5316	29.7318	29.6782	29.4146	29.5806	29.6013	29.668	28.8402	29.1656	29.8338	29.5555	29.2881	29.3945	30.0313	29.4398	28.6118	29.3767	29.5524	29.3018		d4	128		nervous system development [GO:0007399];positive regulation of transcription by RNA polymerase II [GO:0045944]";"negative regulation of transcription, DNA-templated [GO:0045892]	nBAF complex [GO:0071565];nuclear chromatin [GO:0000790];nucleus [GO:0005634]";"histone acetyltransferase complex [GO:0000123]	histone binding [GO:0042393];zinc ion binding [GO:0008270]";"histone acetyltransferase activity [GO:0004402]	16	16	26.1	55.12	0	130.93	8867400000	188	0.336444	0.600851	0.924	0.268839	0.0400958	-0.0493298	0.114712	-0.0640017	1.23001	0.206349	0.924	0.268839	0.478902	0.318169
32.8893	31.1339	32.3272	34.2529	34.2341	33.4222	34.4627	33.5075	34.2099	33.493	33.3316	32.9016	33.7001	33.711	33.7106	33.778	32.9349	33.3199	34.3886	34.6608	34.7435	60S ribosomal protein L38	RpL38	129		cytoplasmic translation [GO:0002181];translation [GO:0006412]	cytosolic ribosome [GO:0022626]";"cytosolic large ribosomal subunit [GO:0022625];ribosome [GO:0005840]	structural constituent of ribosome [GO:0003735]	12	12	75.7	8.1996	0	176.23	173030000000	610	1.15233	0.129237	1.16753	-1.5544	2.0336	-1.25339	3.04969	-1.123	0.815425	-0.537608	1.16753	-1.5544	0.158395	-0.301011
30.0274	30.0638	26.5992	29.4907	29.5597	28.5376	29.3704	30.0469	28.2053	29.5031	29.4864	28.2672	30.7913	28.7071	28.6852	29.201	29.6591	27.0667	29.7363	29.3475	28.4142	Kinesin-like protein;Kinesin-like protein costa	cos	130		intraciliary transport [GO:0042073];microtubule-based movement [GO:0007018];negative regulation of DNA-binding transcription factor activity [GO:0043433];negative regulation of smoothened signaling pathway [GO:0045879];ovarian follicle cell development [GO:0030707];positive regulation of hh target transcription factor activity [GO:0007228];positive regulation of smoothened signaling pathway [GO:0…	cytoplasm [GO:0005737];cytosol [GO:0005829];Hedgehog signaling complex [GO:0035301];kinesin complex [GO:0005871];microtubule [GO:0005874];microtubule associated complex [GO:0005875];plasma membrane [GO:0005886];vesicle membrane [GO:0012506]";"cilium [GO:0005929]	ATP binding [GO:0005524];microtubule binding [GO:0008017];microtubule motor activity [GO:0003777];microtubule motor activity [GO:0003777]";motor activity [GO:0003774];protein homodimerization activity [GO:0042803];protein kinase binding [GO:0019901];smoothened binding [GO:0005119];transcription factor binding [GO:0008134]";"ATP binding [GO:0005524];"ATPase activity [GO:0016887]	35	35	25.6	133.15	0	26.265	6849000000	141	0.0214025	0.961197	0.0509075	-0.11961	0.230742	-0.523709	0.0434301	0.0740633	0.0208013	0.0415446	0.0509075	-0.11961	0.166114	0.404099
33.0285	32.8505	32.9435	32.8781	32.5016	32.8652	32.8144	32.7131	32.8443	32.8169	32.943	32.699	32.4671	32.7552	32.9314	32.4821	32.4975	32.8125	32.4974	32.526	32.4357	Aldehyde dehydrogenase	Aldh-III	131		cellular aldehyde metabolic process [GO:0006081]	integral component of membrane [GO:0016021]	aldehyde dehydrogenase [NAD(P)+] activity [GO:0004030]";"3-chloroallyl aldehyde dehydrogenase activity [GO:0004028];aldehyde dehydrogenase [NAD(P)+] activity [GO:0004030];oxidoreductase activity, acting on the aldehyde or oxo group of donors, NAD or NADP as acceptor [GO:0016620]	29	29	56.7	55.735	0	323.31	77629000000	569	1.41974	0.176338	1.8691	0.358187	0.427621	0.110999	1.47995	0.282387	2.50464	0.304228	1.8691	0.358187	1.01527	0.247188
29.7376	28.4705	29.5022	28.4247	28.2905	28.5808	28.6499	28.696	28.5546	27.7873	28.5337	27.9065	28.0758	28.3814	27.7184	27.389	28.767	29.0352	28.229	28.8607	28.5216		koi	132		nuclear envelope organization [GO:0006998];nuclear migration [GO:0007097];nucleus localization [GO:0051647]";"double-strand break repair via homologous recombination [GO:0000724]	nuclear envelope [GO:0005635];nuclear periphery [GO:0034399];perinuclear region of cytoplasm [GO:0048471]";"integral component of membrane [GO:0016021]	protein membrane anchor [GO:0043495]	24	11	27.5	109.72	0	193.56	4141700000	114	0.736015	0.289601	0.327833	0.297282	0.0921891	-0.14004	1.0937	-0.469926	0.198066	0.0963961	0.327833	0.297282	0.387574	0.437322
27.2509	27.8223	27.6867	27.8135	26.8151	27.8184	27.028	27.0627	26.277	27.4349	27.9632	27.5266	27.4443	27.3209	27.3984	26.9565	NaN	25.4236	27.174	27.7208	27.1628			133	+				9	9	14.8	80.134	0	62.478	1916600000	73	2.01724	0.0369621	0.275097	0.181935	0.804378	-1.1625	0.39345	0.162179	0.827194	-0.563295	0.275097	0.181935	1.52105	1.34444
29.6302	29.5935	29.1346	29.1261	29.2284	29.3678	29.1512	29.0823	28.8701	29.5353	29.2798	29.4847	28.9962	29.8202	29.4048	29.6162	29.4682	30.0675	29.4639	29.362	29.582			134		NADP biosynthetic process [GO:0006741]";"NAD metabolic process [GO:0019674]	mitochondrion [GO:0005739]	NAD+ kinase activity [GO:0003951];protein homodimerization activity [GO:0042803]";"ATP binding [GO:0005524]	15	15	47.5	46.131	0	323.31	8307300000	189	1.43076	0.130931	0.387431	-0.122544	0.578023	0.247995	0.10793	-0.0491654	1.83135	-0.434784	0.387431	-0.122544	1.1187	-0.370539
29.3884	28.8363	29.8342	28.9779	28.1828	28.8343	29.2974	29.1501	29.5928	29.0871	28.9207	29.099	28.8697	29.3993	29.0594	29.6246	28.8804	29.0245	28.6978	28.8716	27.64	Latrophilin Cirl	Cirl	135		adult locomotory behavior [GO:0008344];cell surface receptor signaling pathway [GO:0007166];G protein-coupled receptor signaling pathway [GO:0007186];neurotransmitter secretion [GO:0007269];vesicle-mediated transport [GO:0016192]";"adenylate cyclase-activating G protein-coupled receptor signaling pathway [GO:0007189];cell surface receptor signaling pathway [GO:0007166]	integral component of plasma membrane [GO:0005887];synaptic vesicle [GO:0008021]";"integral component of membrane [GO:0016021];integral component of membrane [GO:0016021]	G protein-coupled receptor activity [GO:0004930];latrotoxin receptor activity [GO:0016524]";transmembrane signaling receptor activity [GO:0004888]";"carbohydrate binding [GO:0030246];carbohydrate binding [GO:0030246]	22	22	15.8	187.63	0	45.151	8167900000	105	0.863236	0.241718	0.718099	0.605893	0.799056	0.773404	1.34405	0.669433	1.09209	0.943652	0.718099	0.605893	0.179486	-0.16751
34.4886	34.2089	34.3386	34.332	34.456	34.6171	34.5184	34.6633	34.5713	34.3518	34.5186	34.3803	34.6735	34.671	34.4527	34.351	34.0134	34.366	34.8697	35.1215	34.6416	14-3-3 protein zeta	14-3-3zeta	136	+	cytoplasmic sequestering of transcription factor [GO:0042994];germarium-derived oocyte fate determination [GO:0007294];learning or memory [GO:0007611];mitotic cell cycle, embryonic [GO:0045448];nervous system development [GO:0007399];olfactory learning [GO:0008355];oocyte microtubule cytoskeleton polarization [GO:0008103];positive regulation of hippo signaling [GO:0035332];positive regulation of …	cytosol [GO:0005829];early endosome [GO:0005769];germline ring canal [GO:0045172];nuclear membrane [GO:0031965];nucleus [GO:0005634];plasma membrane [GO:0005886]";"cytoplasm [GO:0005737]	protein heterodimerization activity [GO:0046982];protein homodimerization activity [GO:0042803];protein kinase C inhibitor activity [GO:0008426];transcription factor binding [GO:0008134]";"protein domain specific binding [GO:0019904];protein domain specific binding [GO:0019904]	26	24	74.2	28.227	0	323.31	331720000000	945	2.69395	0.0327385	2.15723	-0.470751	1.61163	-0.634168	1.69797	-0.369662	0.946983	-0.293307	2.15723	-0.470751	0.709502	0.163417
NaN	NaN	NaN	NaN	27.5601	NaN	NaN	NaN	27.2272	26.858	27.2565	NaN	28.0619	NaN	27.5511	NaN	28.3928	NaN	NaN	NaN	NaN	Transcription factor AP-1	Jra	137		dorsal appendage formation [GO:0046843];dorsal closure [GO:0007391];establishment of planar polarity [GO:0001736];imaginal disc fusion, thorax closure [GO:0046529];JNK cascade [GO:0007254];MAPK cascade [GO:0000165];micropyle formation [GO:0046844];multicellular organism aging [GO:0010259];negative regulation of antimicrobial humoral response [GO:0008348];negative regulation of transcription by RN…	nuclear chromatin [GO:0000790];nucleoplasm [GO:0005654];nucleus [GO:0005634];transcription factor complex [GO:0005667]";"cytosol [GO:0005829]	DNA-binding transcription factor activity [GO:0003700]";protein heterodimerization activity [GO:0046982];RNA polymerase II proximal promoter sequence-specific DNA binding [GO:0000978];transcription coactivator activity [GO:0003713];transcription factor binding [GO:0008134]";"DNA binding [GO:0003677];"DNA-binding transcription factor activity, RNA polymerase II-specific [GO:0000981]	3	3	8.9	39.869	0.00034904	3.8383	712300000	7	0	1	0	NaN	0	NaN	0	NaN	0	NaN	0	NaN	0	-0.83268
NaN	NaN	NaN	NaN	NaN	NaN	24.1148	NaN	NaN	NaN	NaN	NaN	22.4923	NaN	NaN	22.8786	NaN	23.5485	22.8197	NaN	NaN	Protein Vhl	Vhl	138		cell differentiation [GO:0030154];centrosome cycle [GO:0007098];epithelial cell migration, open tracheal system [GO:0007427];establishment or maintenance of polarity of follicular epithelium [GO:0016334];lumen formation, open tracheal system [GO:0035149];mitotic spindle assembly [GO:0090307];negative regulation of microtubule depolymerization [GO:0007026];open tracheal system development [GO:0007…	VCB complex [GO:0030891]		4	4	24.2	21.24	0.005618	1.6378	57544000	4	NaN	NaN	0	NaN	0	0.393829	0	-0.327385	0	1.2951	0	NaN	0	NaN
NaN	NaN	NaN	23.5744	NaN	23.8152	23.6699	25.0942	24.6968	25.8316	24.7758	25.0969	NaN	NaN	NaN	NaN	NaN	NaN	NaN	NaN	NaN	Coronin	coro	139		defense response to fungus [GO:0050832]";"adult somatic muscle development [GO:0007527]			34	1	69.9	58.066	0.00017813	5.1525	159050000	4	1.07758	0.152	0	NaN	-4.34294e-08	0	0	NaN	0	NaN	0	NaN	0	NaN
27.1521	27.6585	26.6089	27.0476	27.99	26.8479	28.1355	27.6243	26.1164	27.3393	27.2256	25.4187	26.8428	26.9082	26.2958	26.4322	27.2761	26.9908	27.9302	27.5625	27.8806	Enhancer of polycomb-like protein	E(Pc)	140		dendrite guidance [GO:0070983];histone acetylation [GO:0016573];histone exchange [GO:0043486];regulation of transcription by RNA polymerase II [GO:0006357]";"chromatin organization [GO:0006325]	intercalary heterochromatin [GO:0005725];NuA4 histone acetyltransferase complex [GO:0035267];nucleus [GO:0005634];Piccolo NuA4 histone acetyltransferase complex [GO:0032777];polytene chromosome [GO:0005700]";"histone acetyltransferase complex [GO:0000123]		15	15	10.8	216.37	0	77.357	1608800000	55	0.721311	0.283922	0.94402	-0.573584	1.50823	-0.891404	1.44017	-1.11938	0.333551	-0.499042	0.94402	-0.573584	0.406647	0.31782
25.3182	24.4565	24.3813	25.3819	25.1232	23.9592	NaN	NaN	NaN	24.6616	25.1973	24.3772	25.1037	NaN	23.996	27.1449	25.422	NaN	25.0475	NaN	24.0366		CG9003-RC	141		response to endoplasmic reticulum stress [GO:0034976];SCF-dependent proteasomal ubiquitin-dependent protein catabolic process [GO:0031146];ubiquitin-dependent protein catabolic process [GO:0006511]";"protein ubiquitination [GO:0016567]	SCF ubiquitin ligase complex [GO:0019005]";"integral component of membrane [GO:0016021];SCF ubiquitin ligase complex [GO:0019005]		6	6	18.8	47.718	0	9.9665	320990000	17	1.26489	0.109145	0.179054	0.228021	0.650983	1.74142	0.0986435	0.125155	0	NaN	0.179054	0.228021	1.35677	-1.5134
31.035	30.8478	31.4892	30.4351	30.3485	30.7486	31.0725	31.011	31.1736	31.4387	30.7485	30.8825	30.9673	30.9489	31.0683	31.7617	30.8088	32.0393	31.039	30.7724	30.9049	Proteasome inhibitor PI31 subunit	PI31	142		male meiotic nuclear division [GO:0007140];positive regulation of proteasomal ubiquitin-dependent protein catabolic process [GO:0032436];proteasome assembly [GO:0043248];ubiquitin-dependent protein catabolic process [GO:0006511]";"male gonad development [GO:0008584]	proteasome complex [GO:0000502];sperm individualization complex [GO:0070864]";"cytoplasm [GO:0005737]		16	16	50	30.088	0	188.95	26207000000	259	0.922772	0.234624	0.131193	-0.088095	0.763189	0.631155	0.291699	0.10355	0.931987	0.180207	0.131193	-0.088095	1.10712	-0.71925
26.9178	26.1669	25.8471	24.6279	26.4445	25.3916	24.8406	25.4225	NaN	27.0357	27.044	25.2229	26.2475	24.3908	24.5127	24.9995	NaN	NaN	26.1809	24.3494	24.5176	Protein GDAP2 homolog	CG18812-RA;CG18812-RB;CG18812	143					4	4	22.1	24.978	0	46.67	581130000	18	0.254412	0.622683	0.708941	0.883334	0	-0.0164604	0.395791	0.726296	0.0494844	0.115572	0.708941	0.883334	0	0.899794
25.784	NaN	28.7123	NaN	NaN	NaN	28.3969	28.9866	NaN	25.9106	25.6168	26.3652	23.1558	NaN	26.1006	26.7544	26.7862	NaN	NaN	NaN	NaN		Vang	144		dendrite self-avoidance [GO:0070593];establishment of ommatidial planar polarity [GO:0042067];establishment of planar polarity [GO:0001736];morphogenesis of a polarized epithelium [GO:0001738];ommatidial rotation [GO:0016318];positive regulation of axon extension [GO:0045773];positive regulation of axon guidance [GO:1902669];regulation of establishment of planar polarity [GO:0090175]";"border fol…	plasma membrane [GO:0005886]";"integral component of membrane [GO:0016021]	frizzled binding [GO:0005109]	5	5	8.8	65.874	0	7.6015	773950000	10	1.08993	0.126307	0	NaN	0	NaN	0	NaN	0	NaN	0	NaN	0.110609	0.477828
NaN	25.4688	25.3592	25.0247	NaN	NaN	25.527	25.9568	NaN	24.6929	25.9833	24.3456	27.5846	25.8373	25.5529	24.172	25.4014	24.7973	24.4909	NaN	NaN			145					5	5	10	54.424	0	20.705	449540000	19	0.286402	0.590767	0	0.793361	0	0.299377	0	1.17524	0	1.25104	0	0.793361	0.580673	0.493984
31.7452	32.4633	32.2216	31.7812	32.0716	31.7365	31.5879	32.0632	31.7765	32.038	32.4869	32.005	32.2393	31.9838	32.0029	32.0121	31.8986	31.9504	31.7839	32.0856	31.8416		row	146		regulation of transcription by RNA polymerase II [GO:0006357]";"regulation of transcription, DNA-templated [GO:0006355]	protein-containing complex [GO:0032991]";"nucleus [GO:0005634]	nucleic acid binding [GO:0003676]	62	62	54.8	143.68	0	323.31	46280000000	681	0.431495	0.570241	0.210815	0.0995537	0.195653	0.0499738	0.848929	0.222299	0.221662	-0.0944735	0.210815	0.0995537	0.101382	0.0495799
25.0527	26.1274	25.8047	25.4928	26.2247	26.1218	25.1555	26.3969	25.5178	25.5925	26.1159	25.2365	26.6625	NaN	25.8216	26.4651	27.5737	26.0552	25.4271	NaN	26.1057	Exostosin-1	ttv	147		germ cell migration [GO:0008354];glycosaminoglycan biosynthetic process [GO:0006024];heparan sulfate proteoglycan biosynthetic process [GO:0015012];heparan sulfate proteoglycan biosynthetic process, polysaccharide chain biosynthetic process [GO:0015014];heparin biosynthetic process [GO:0030210];N-acetylglucosamine metabolic process [GO:0006044];positive regulation of canonical Wnt signaling pathw…	endoplasmic reticulum membrane [GO:0005789];Golgi apparatus [GO:0005794];Golgi membrane [GO:0000139];integral component of membrane [GO:0016021]";"endoplasmic reticulum [GO:0005783];integral component of membrane [GO:0016021]	glucuronosyl-N-acetylglucosaminyl-proteoglycan 4-alpha-N-acetylglucosaminyltransferase activity [GO:0050508];glucuronosyltransferase activity [GO:0015020];metal ion binding [GO:0046872];N-acetylglucosaminyl-proteoglycan 4-beta-glucuronosyltransferase activity [GO:0050509]";"acetylglucosaminyltransferase activity [GO:0008375];"glucuronosyl-N-acetylglucosaminyl-proteoglycan 4-alpha-N-acetylglucosam…	9	9	15.5	87.308	0	40.249	651660000	33	0.655698	0.319316	0.0345046	0.0376148	0.619324	0.931594	0.0979608	0.119385	0.047554	-0.0763677	0.0345046	0.0376148	1.20601	-0.893979
29.2672	30.0932	28.9585	29.3891	29.4602	29.0522	29.3169	29.7614	29.1626	29.1482	29.0351	28.7561	29.0697	25.8659	27.3912	29.3143	29.2947	28.2936	29.6218	29.5397	29.0175	Protein slit;Protein slit N-product;Protein slit C-product	sli	148		axon midline choice point recognition [GO:0016199];dendrite morphogenesis [GO:0048813];digestive tract mesoderm development [GO:0007502];embryonic heart tube development [GO:0035050];epithelial cell migration, open tracheal system [GO:0007427];glial cell migration [GO:0008347];gonad development [GO:0008406];induction of negative chemotaxis [GO:0050929];mesoderm migration involved in gastrulation …	integral component of membrane [GO:0016021]";plasma membrane [GO:0005886];Slit-Robo signaling complex [GO:0071666]";"extracellular region [GO:0005576]	heparin binding [GO:0008201];Roundabout binding [GO:0048495]";"calcium ion binding [GO:0005509];calcium ion binding [GO:0005509]	34	34	19.5	241.3	0	176.08	6656100000	186	0.880201	0.204071	0.0292333	-0.0229324	0.47785	-0.425463	0.736452	-1.18196	0.0265394	0.020642	0.0292333	-0.0229324	0.589	0.402531
29.669	29.5356	29.2206	28.0794	29.554	27.9328	28.3701	29.0336	28.1728	29.4338	29.359	28.5837	30.2184	29.0727	29.1278	29.6053	29.4382	29.9045	28.9672	29.0109	27.9832	Patronin	Patronin	150		cytoplasmic microtubule organization [GO:0031122];establishment of mitotic spindle asymmetry [GO:0061867];microtubule cytoskeleton organization [GO:0000226];negative regulation of microtubule depolymerization [GO:0007026];neuron projection development [GO:0031175]";"asymmetric protein localization involved in cell fate determination [GO:0045167];neuron projection development [GO:0031175]	cytoplasm [GO:0005737];microtubule [GO:0005874];midbody [GO:0030496];spindle [GO:0005819]";"centrosome [GO:0005813];microtubule [GO:0005874]	microtubule binding [GO:0008017];microtubule minus-end binding [GO:0051011];spectrin binding [GO:0030507]";"calmodulin binding [GO:0005516]	39	39	32.2	173.49	0	181.63	6317500000	198	0.809766	0.244217	0.278417	0.34479	1.28874	0.99559	0.846728	0.645442	0.109171	-0.128239	0.278417	0.34479	0.667822	-0.6508
30.115	30.9935	29.8883	29.3941	30.9404	29.9555	30.1024	31.3451	29.9627	30.0864	30.7942	30.1827	31.0909	30.0256	30.2459	30.3261	30.9614	30.3245	29.6876	30.8235	29.9811		sbb	151		axon target recognition [GO:0007412];imaginal disc-derived wing morphogenesis [GO:0007476];larval locomotory behavior [GO:0008345];negative regulation of smoothened signaling pathway [GO:0045879];negative regulation of transcription by RNA polymerase II [GO:0000122];regulation of imaginal disc growth [GO:0045570];wing disc dorsal/ventral pattern formation [GO:0048190]";"axon guidance [GO:0007411]	nucleus [GO:0005634]	transcription corepressor activity [GO:0003714]";"nucleic acid binding [GO:0003676];transcription corepressor activity [GO:0003714]	29	29	16.5	230.01	0	258.88	13796000000	315	0.0587228	0.906616	0.0401538	0.050361	0.392894	0.373279	0.296608	0.240209	0.213742	0.305957	0.0401538	0.050361	0.348726	-0.322918
33.7222	33.8123	33.6952	33.3628	33.6048	33.6657	33.162	33.2426	33.1778	33.7311	33.6757	33.4815	33.7233	33.5442	33.574	33.6559	33.6055	33.695	33.3877	33.8025	33.4371	Coronin	coro	152	+	defense response to fungus [GO:0050832]";"adult somatic muscle development [GO:0007527]			34	1	69.9	57.268	0	323.31	143870000000	821	2.73026	0.0388203	0.350666	0.101404	0.34013	0.109697	0.321109	0.079181	1.22905	-0.348325	0.350666	0.101404	0.0307028	-0.00829315
26.8382	28.6816	25.6068	25.0409	27.602	25.7843	23.2292	25.9423	24.6766	27.6508	28.0829	26.8927	26.1618	NaN	26.2372	26.8947	28.3588	27.6954	27.0455	26.8226	25.7832	Inositol-pentakisphosphate 2-kinase	Ipk1	153		inositol phosphorylation [GO:0052746]";"inositol phosphate biosynthetic process [GO:0032958]	nucleus [GO:0005634]	inositol pentakisphosphate 2-kinase activity [GO:0035299]";"ATP binding [GO:0005524]	18	18	29.5	78.306	0	30.777	1373100000	64	1.40381	0.0772297	0.0165499	0.0418402	0.89131	1.09916	0.333658	0.454623	1.03838	-1.93444	0.0165499	0.0418402	0.58053	-1.05732
25.8547	28.1948	23.8997	25.8527	26.7357	25.5911	26.0406	26.8474	NaN	24.06	24.6189	26.2527	NaN	25.015	25.5902	26.9757	25.2572	27.4852	25.7475	26.4073	27.129		jbug	154		photoreceptor cell axon guidance [GO:0072499];response to mechanical stimulus [GO:0009612]";"establishment of body hair or bristle planar orientation [GO:0048104]		actin binding [GO:0003779]	27	18	12.3	306.05	0	29.022	1582500000	46	0.462771	0.418889	0.180797	-0.406464	0.0643342	0.144808	1.18962	-1.32056	0.00870421	0.0161009	0.180797	-0.406464	0.235894	-0.551271
NaN	NaN	NaN	NaN	NaN	NaN	NaN	NaN	NaN	NaN	24.7715	NaN	24.173	21.6673	22.6253	NaN	NaN	NaN	NaN	NaN	NaN			155			integral component of membrane [GO:0016021]		1	1	17.4	9.5341	0.00068658	2.939	29527000	2	0	1	-4.34294e-08	0	-4.34294e-08	0	0	NaN	-4.34294e-08	0	-4.34294e-08	0	-4.34294e-08	0
27.1117	26.3065	23.4478	26.081	25.165	25.6157	27.6082	27.5057	28.0847	26.289	28.3744	26.1099	26.3046	26.171	25.2196	25.7478	26.5336	26.1141	26.2364	NaN	27.5201		fab1-RA	156			anaphase-promoting complex [GO:0005680]		2	2	41.2	8.8248	0	27.085	1322200000	35	1.04967	0.14447	0.606752	-1.25692	0.559859	-0.746341	0.224522	-0.466784	0.686456	0.854667	0.606752	-1.25692	0.280122	-0.510582
24.7615	NaN	NaN	24.6598	NaN	NaN	NaN	NaN	NaN	23.5417	NaN	23.9859	24.4859	NaN	25.0812	NaN	NaN	NaN	25.9336	NaN	NaN	Polycomb protein Pcl	Pcl	158		defense response to fungus [GO:0050832];negative regulation of transcription, DNA-templated [GO:0045892];positive regulation of histone H3-K27 methylation [GO:0061087];positive regulation of transcription, DNA-templated [GO:0045893];ventral cord development [GO:0007419]";"chromatin organization [GO:0006325]	nucleus [GO:0005634]";"chromosome [GO:0005694]	DNA binding [GO:0003677];DNA-binding transcription factor activity [GO:0003700];metal ion binding [GO:0046872];methylated histone binding [GO:0035064];sequence-specific DNA binding [GO:0043565]";"chromatin binding [GO:0003682];metal ion binding [GO:0046872]	4	4	3.8	114.64	0.00069049	3.2183	192860000	10	0.367042	0.539868	0	-1.22293	0	NaN	0	-1.65992	0	NaN	0	-1.22293	0	NaN
27.2447	29.0048	27.6846	27.6651	27.435	27.8489	26.3061	26.9009	26.4357	28.2305	28.8036	27.8181	27.1923	26.1226	27.1407	28.3395	29.1103	26.5164	27.1344	28.7222	28.2968		Mctp	159		regulation of neurotransmitter secretion [GO:0046928]";"regulation of neuronal synaptic plasticity [GO:0048168]	integral component of membrane [GO:0016021]";"endoplasmic reticulum membrane [GO:0005789];integral component of membrane [GO:0016021]	calcium ion binding [GO:0005509]	10	10	15.4	69.059	0	18.278	2373600000	44	0.666812	0.300042	0.194607	-0.237266	0.0230801	-0.0624231	0.334892	-0.499829	1.38194	-1.50357	0.194607	-0.237266	0.103548	-0.174843
29.1345	28.2182	28.5856	28.5794	27.3438	28.668	28.1027	27.8026	28.736	27.858	28.1994	28.8084	27.3189	28.795	28.3999	28.8547	28.8722	NaN	28.5165	27.7977	27.2526	E3 ubiquitin-protein ligase Topors	Topors	160		chromatin organization [GO:0006325];male meiosis chromosome segregation [GO:0007060];male meiotic nuclear division [GO:0007140];meiotic chromosome condensation [GO:0010032];nuclear membrane organization [GO:0071763];nucleus organization [GO:0006997];protein import into peroxisome matrix [GO:0016558];protein polyubiquitination [GO:0000209];regulation of transcription, DNA-templated [GO:0006355];ub…	nucleus [GO:0005634];peroxisomal membrane [GO:0005778];polytene chromosome [GO:0005700]";"nuclear lamina [GO:0005652]	metal ion binding [GO:0046872]";ubiquitin protein ligase activity [GO:0061630];zinc ion binding [GO:0008270]";"isomerase activity [GO:0016853];"lamin binding [GO:0005521]	10	10	13.1	113.31	0	61.551	3793700000	56	0.397977	0.505769	0.633232	0.565987	0.911266	1.0079	0.396731	0.374338	0.320781	0.35817	0.633232	0.565987	0.438659	-0.441909
29.7714	29.952	29.7518	30.5513	29.9546	30.1914	30.7744	30.3692	30.8894	30.277	30.4254	30.334	29.8408	29.9335	29.6134	30.3736	29.6223	31.1439	30.1256	29.8182	29.9389	Vacuolar protein sorting-associated protein 28 homolog	Vps28	161		autophagosome maturation [GO:0097352];autophagy [GO:0006914];compound eye development [GO:0048749];embryo development ending in birth or egg hatching [GO:0009792];endosome transport via multivesicular body sorting pathway [GO:0032509];negative regulation of growth of symbiont in host [GO:0044130];neuron remodeling [GO:0016322];protein transport to vacuole involved in ubiquitin-dependent protein c…	ESCRT I complex [GO:0000813]	protein-containing complex binding [GO:0044877]	18	18	77.1	24.512	0	298.2	13972000000	214	0.88622	0.24275	0.136329	0.0678635	0.394906	0.419055	0.220364	0.109818	1.77524	0.716777	0.136329	0.0678635	0.47488	-0.351192
27.2104	26.321	26.7852	26.5109	26.7982	24.2737	25.6446	25.2872	24.2405	25.9818	25.4039	26.2451	25.0559	25.5295	25.9324	25.5437	24.7344	25.0078	25.1111	24.7575	NaN		Ppa;ppa	162		SCF-dependent proteasomal ubiquitin-dependent protein catabolic process [GO:0031146];SCF-dependent proteasomal ubiquitin-dependent protein catabolic process [GO:0031146]";ubiquitin-dependent protein catabolic process [GO:0006511]";"protein ubiquitination [GO:0016567]	SCF ubiquitin ligase complex [GO:0019005]		10	10	22.7	58.384	0	18.476	634710000	32	1.14475	0.129111	0.892391	1.3823	0.178703	0.161021	1.18079	0.757167	0.0757732	0.123192	0.892391	1.3823	1.00176	1.22128
31.3214	31.0636	31.6468	30.9848	30.9113	31.5779	31.7357	31.0168	31.2876	31.5554	30.6536	31.3617	30.5051	31.0858	30.754	31.4782	31.4541	31.756	30.7151	30.6777	30.6477	OCIA domain-containing protein 1	asrij	163		larval lymph gland hemopoiesis [GO:0035167];lymph gland development [GO:0048542];positive regulation of JAK-STAT cascade [GO:0046427];regulation of stem cell differentiation [GO:2000736]";"embryonic hemopoiesis [GO:0035162]	early endosome [GO:0005769];Golgi apparatus [GO:0005794];integral component of membrane [GO:0016021];lysosome [GO:0005764];recycling endosome [GO:0055037]";"cytoplasmic vesicle [GO:0031410]		17	17	70.5	28.692	0	323.31	29426000000	261	1.54717	0.0919134	1.72746	0.570769	3.06126	0.882609	0.584322	0.305762	1.46877	0.666571	1.72746	0.570769	0.800335	-0.31184
28.112	29.0818	28.0361	27.1436	27.9639	27.2358	28.1115	28.137	28.1084	28.4253	28.4412	27.6086	28.2462	27.5003	28.3415	27.7865	27.9321	27.3598	27.3026	28.0373	25.9586			164		RNA processing [GO:0006396]		RNA binding [GO:0003723]	20	20	29.6	93.84	0	129.19	3241300000	97	0.674213	0.311613	0.709507	0.829351	0.396572	0.593293	1.13443	0.994343	0.771421	1.01946	0.709507	0.829351	0.2188	0.236059
29.91	28.1719	28.5927	29.3117	29.2914	29.9833	28.373	29.2104	29.0681	29.1592	29.3813	29.4823	29.3524	29.8604	28.3107	28.471	28.4786	30.1162	29.6575	29.3663	29.3807		Uba1	165		cell proliferation [GO:0008283];cellular response to DNA damage stimulus [GO:0006974];larval midgut cell programmed cell death [GO:0035096];lipid storage [GO:0019915];mushroom body development [GO:0016319];neuron remodeling [GO:0016322];ovarian follicle cell development [GO:0030707];protein polyubiquitination [GO:0000209];protein ubiquitination [GO:0016567];regulation of growth [GO:0040008];regul…	dendrite [GO:0030425];plasma membrane [GO:0005886]";"cytoplasm [GO:0005737]	ubiquitin activating enzyme activity [GO:0004839]";"ATP binding [GO:0005524]	97	1	90.4	111.77	0	94.662	7203900000	58	0.0966806	0.850439	0.244474	-0.25798	0.331	-0.446229	0.278404	-0.210478	0.994707	-0.584352	0.244474	-0.25798	0.127405	0.188249
30.6453	30.8501	30.855	30.7453	30.7631	31.0107	30.8486	30.8668	30.7903	30.6979	30.7975	31.0219	30.7217	31.1716	30.7268	31.1527	31.0986	30.9287	30.765	30.6964	30.8109		aux	166		clathrin-dependent endocytosis [GO:0072583];compound eye morphogenesis [GO:0001745];negative regulation of neuron death [GO:1901215];Notch signaling pathway [GO:0007219];protein phosphorylation [GO:0006468];receptor-mediated endocytosis [GO:0006898];sperm individualization [GO:0007291]";"clathrin coat disassembly [GO:0072318]	Golgi stack [GO:0005795];intracellular membrane-bounded organelle [GO:0043231];vesicle [GO:0031982]";"cytoplasm [GO:0005737]	clathrin binding [GO:0030276];protein kinase activity [GO:0004672]";"ATP binding [GO:0005524]	37	37	38.9	127.07	0	323.31	21395000000	467	0.935147	0.363889	0.294587	0.0541134	1.79994	0.302528	0.364083	0.0987829	0.896022	0.077776	0.294587	0.0541134	1.62117	-0.248414
28.7622	27.7917	28.5709	28.3769	28.2942	26.6171	27.6804	27.9642	28.4615	28.3396	28.1242	26.7356	27.9009	27.674	26.7758	25.9988	27.7292	27.6099	26.8564	27.3611	27.6088		Alh	167		instar larval development [GO:0002168];larval somatic muscle development [GO:0007526];male courtship behavior, veined wing generated song production [GO:0045433];molting cycle, chitin-based cuticle [GO:0007591];regulation of transcription, DNA-templated [GO:0006355]";"haltere development [GO:0007482]	nucleus [GO:0005634]	metal ion binding [GO:0046872]";"DNA-binding transcription factor activity [GO:0003700];DNA-binding transcription factor activity [GO:0003700]	8	8	11.7	84.326	0	106.05	2350300000	67	0.562616	0.370608	0.826204	0.793402	0.097111	-0.16282	0.309882	0.316265	1.1238	0.759919	0.826204	0.793402	0.820558	0.956223
29.0395	28.8395	28.6399	29.0026	29.1859	28.6016	28.1036	28.3957	27.1936	29.3923	28.9256	28.3171	28.7591	28.6736	28.4499	27.2939	28.9133	26.0182	28.5009	28.3853	27.9421		Atg9	168		autophagy [GO:0006914];autophagy of mitochondrion [GO:0000422];cellular response to oxidative stress [GO:0034599];cellular response to starvation [GO:0009267];glycophagy [GO:0061723];intestinal epithelial structure maintenance [GO:0060729];larval midgut cell programmed cell death [GO:0035096];larval midgut histolysis [GO:0035069];late nucleophagy [GO:0044805];negative regulation of TOR signaling …	cell junction [GO:0030054];cytoplasm [GO:0005737];cytoplasmic vesicle membrane [GO:0030659];Golgi apparatus [GO:0005794];integral component of membrane [GO:0016021];integral component of membrane [GO:0016021]";phagophore assembly site [GO:0000407]";"autophagosome [GO:0005776];"cell junction [GO:0030054]		22	22	36.2	95.43	0	305.56	4545800000	144	1.64302	0.0607346	1.95058	0.608737	0.434704	-0.867623	0.990652	0.476847	0.400462	-0.378471	1.95058	0.608737	1.45669	1.47636
27.8255	27.5797	24.2965	27.0244	27.1051	28.5909	NaN	26.5187	25.5782	27.7806	27.8266	27.239	27.6688	NaN	23.3182	NaN	NaN	NaN	25.4753	26.7439	NaN	Succinate dehydrogenase assembly factor 2, mitochondrial;Succinate dehydrogenase assembly factor 2-B, mitochondrial	CG12895	169		mitochondrial respiratory chain complex II assembly [GO:0034553];protein-FAD linkage [GO:0018293];protein-FAD linkage [GO:0018293]";tricarboxylic acid cycle [GO:0006099]";"mitochondrial electron transport, succinate to ubiquinone [GO:0006121]	mitochondrion [GO:0005739]";"mitochondrial matrix [GO:0005759];mitochondrial matrix [GO:0005759]		4	4	42.3	18.38	0	22.618	1070000000	21	0.0920845	0.837273	0.365828	0.960736	0	NaN	0.168825	0.657018	0.0244424	-0.061204	0.365828	0.960736	0	NaN
NaN	NaN	NaN	26.1299	29.7129	27.7223	28.0856	28.4946	26.7133	30.0473	29.3891	27.1829	28.0594	27.9347	26.6334	26.6564	27.3778	27.3236	27.6546	27.5509	26.2676		CG7701;CG30015-RB	170					17	17	17.2	136.17	0	110.8	2371600000	46	0.187984	0.694548	0.244115	0.69735	0.0256143	-0.0384401	0.61034	1.05009	0.361957	0.606798	0.244115	0.69735	0.27854	0.73579
31.3613	31.2769	31.4767	30.8837	31.1104	31.1831	30.986	31.1717	31.0621	31.037	31.039	31.2349	31.0946	31.0648	30.9244	30.8139	31.0272	31.0003	30.9997	31.1175	31.0071		CD98hc	171		L-leucine import across plasma membrane [GO:1903801]";"carbohydrate metabolic process [GO:0005975]	plasma membrane [GO:0005886]";"integral component of membrane [GO:0016021]	catalytic activity [GO:0003824]	28	28	53.6	62.676	0	323.31	23028000000	413	0.886788	0.380718	0.674309	0.173905	0.540075	-0.0943349	0.142557	0.0243518	0.183859	0.0318203	0.674309	0.173905	1.09212	0.26824
31.7629	31.5654	31.9249	31.3062	31.3781	31.3479	31.9718	31.6927	31.8705	31.7242	31.448	31.2364	31.7462	31.5133	31.585	31.5749	31.6092	31.6768	31.812	31.8995	31.5411			172		mRNA splicing, via spliceosome [GO:0000398]	nucleus [GO:0005634];precatalytic spliceosome [GO:0071011]";"catalytic step 2 spliceosome [GO:0071013]	RNA polymerase binding [GO:0070063]	55	53	36.8	129.75	0	323.31	37183000000	793	0.732839	0.39764	0.584486	-0.203288	0.51089	-0.130558	0.790359	-0.208699	0.28016	0.0941709	0.584486	-0.203288	0.189896	-0.0727301
24.5465	26.2087	NaN	25.131	NaN	24.801	23.5782	NaN	NaN	24.3977	24.7613	NaN	23.7758	NaN	25.0698	NaN	NaN	25.5787	23.8372	NaN	NaN		shn	173		compound eye morphogenesis [GO:0001745];dendrite morphogenesis [GO:0048813];dorsal closure [GO:0007391];ectoderm development [GO:0007398];imaginal disc-derived wing morphogenesis [GO:0007476];imaginal disc-derived wing vein morphogenesis [GO:0008586];Malpighian tubule morphogenesis [GO:0007443];midgut development [GO:0007494];negative regulation of cell proliferation [GO:0008285];negative regulat…	nucleus [GO:0005634]	nucleic acid binding [GO:0003676];RNA polymerase II activating transcription factor binding [GO:0001102];transcription coactivator activity [GO:0003713];transcription factor activity, RNA polymerase II distal enhancer sequence-specific binding [GO:0003705];zinc ion binding [GO:0008270]";"DNA-binding transcription factor activity [GO:0003700]	5	5	2.9	271.86	0	18.227	211110000	11	0.710694	0.317772	0	1.3346	0	1.7415	0	0.663937	0	-0.259016	0	1.3346	0	-0.406902
26.0057	NaN	24.7485	NaN	NaN	24.8202	25.9932	NaN	NaN	26.2634	28.7097	26.5078	25.6615	NaN	25.7842	27.0513	24.2658	26.3355	25.2559	24.8415	26.9867		rib	174		central nervous system development [GO:0007417];cytoskeleton organization [GO:0007010];dorsal closure [GO:0007391];epithelial cell migration, open tracheal system [GO:0007427];establishment or maintenance of epithelial cell apical/basal polarity [GO:0045197];gonad development [GO:0008406];head involution [GO:0008258];hindgut morphogenesis [GO:0007442];Malpighian tubule morphogenesis [GO:0007443];…	nucleus [GO:0005634]	DNA-binding transcription factor activity [GO:0003700]";"DNA binding [GO:0003677]	6	6	13.2	70.977	0	9.6044	873120000	21	0.343259	0.524869	0.259141	-0.50325	0.0619176	0.189506	0.455357	0.890605	0	0.29845	0.259141	-0.50325	0.303258	-0.692756
30.1619	30.4785	30.0514	29.859	30.4952	28.9181	28.7504	29.2094	28.3223	30.2752	30.78	28.6793	29.5768	29.1495	28.559	28.8717	29.862	28.1358	28.8528	29.6547	28.6848		LRP1	175			integral component of membrane [GO:0016021]";"cytosol [GO:0005829]	calcium ion binding [GO:0005509]	71	71	17.4	528.32	0	166.3	9022900000	262	0.916899	0.196543	1.27873	0.929903	0.0642502	-0.107622	0.33517	0.439176	0.31507	-0.303418	1.27873	0.929903	1.17784	1.03753
29.4628	29.0933	28.2987	28.9075	29.2288	28.6085	28.2736	28.3696	26.3299	29.4723	28.5523	28.7985	28.7508	28.326	28.8539	28.8026	28.0581	28.2341	29.1353	28.6859	27.9778	Arginyl-tRNA--protein transferase 1	Ate1	176				arginyltransferase activity [GO:0004057]	20	4	43.1	54.993	0	236.88	5308300000	137	1.21613	0.123977	0.450688	0.333587	0.226793	-0.234749	0.248008	0.192623	0.561068	-0.941997	0.450688	0.333587	1.02723	0.568336
24.817	24.6028	NaN	24.9336	26.9882	24.5429	25.5373	26.2519	25.6907	24.8455	26.0809	NaN	26.6583	25.1825	25.2456	24.348	26.0951	25.7629	25.5776	26.9062	25.5048			177		positive regulation of transcription by RNA polymerase II [GO:0045944]";"gravitaxis [GO:0042332];gravitaxis [GO:0042332]	nucleus [GO:0005634]	RNA polymerase II regulatory region sequence-specific DNA binding [GO:0000977];zinc ion binding [GO:0008270]";"DNA-binding transcription factor activity, RNA polymerase II-specific [GO:0000981];nucleic acid binding [GO:0003676]	11	11	8.5	183	0	26.667	481710000	32	0.166031	0.737756	0.547374	-0.819315	0.350992	-0.59419	0.296905	-0.393632	0.122762	-0.169548	0.547374	-0.819315	0.115291	-0.225125
32.0946	32.43	32.1371	31.1861	31.4034	31.7266	30.9037	31.8528	31.6531	31.5411	31.2135	31.6603	31.3634	31.6019	31.1409	31.2314	31.716	31.9948	31.5156	31.6131	31.6091	Phosphatidylinositol-binding clathrin assembly protein LAP	lap	178		clathrin coat assembly [GO:0048268];clathrin-dependent synaptic vesicle endocytosis [GO:0150007];neuron-neuron synaptic transmission [GO:0007270];phototaxis [GO:0042331];positive regulation of clathrin-dependent endocytosis [GO:2000370];receptor-mediated endocytosis [GO:0006898];synaptic vesicle transport [GO:0048489]";"chemical synaptic transmission [GO:0007268];clathrin coat assembly [GO:004826…	clathrin-coated vesicle [GO:0030136];Golgi apparatus [GO:0005794];presynapse [GO:0098793]";"clathrin-coated pit [GO:0005905];clathrin-coated vesicle [GO:0030136]	clathrin binding [GO:0030276]";"1-phosphatidylinositol binding [GO:0005545]	26	26	37.9	80.897	0	323.31	37254000000	473	0.384965	0.553251	0.388429	0.250397	0.109421	0.0681705	0.585854	-0.159065	0.139234	-0.109404	0.388429	0.250397	0.231821	0.182226
33.241	33.6408	33.7244	33.4059	33.4222	33.3304	32.797	33.1364	33.0336	33.4269	33.4492	33.2124	33.5936	33.3248	33.4031	33.4543	33.3188	33.4292	33.5274	33.225	33.3318		Acsl	179		chemical synaptic transmission [GO:0007268];early endosome to recycling endosome transport [GO:0061502];fatty acid biosynthetic process [GO:0006633];long-chain fatty acid metabolic process [GO:0001676];long-chain fatty-acyl-CoA biosynthetic process [GO:0035338];negative regulation of BMP signaling pathway [GO:0030514];negative regulation of synaptic growth at neuromuscular junction [GO:0045886];n…	cytoplasm [GO:0005737];cytosol [GO:0005829];endoplasmic reticulum [GO:0005783];endoplasmic reticulum [GO:0005783]";integral component of membrane [GO:0016021]";peroxisome [GO:0005777]";"axon [GO:0030424]	long-chain fatty acid-CoA ligase activity [GO:0004467];long-chain fatty acid-CoA ligase activity [GO:0004467]";palmitoyl-CoA ligase activity [GO:0090433]";"decanoate-CoA ligase activity [GO:0102391]	53	53	67.3	79.427	0	323.31	128610000000	1007	2.17384	0.0677975	0.344226	0.0993703	0.149843	0.0393321	0.163194	0.0402768	1.30292	-0.372392	0.344226	0.0993703	0.211274	0.0600382
31.3607	31.8706	31.8751	31.5593	31.3621	31.5722	31.5189	31.262	31.5197	31.7527	31.2995	31.7275	31.149	31.703	31.7547	31.9103	31.7391	31.779	32.0758	31.7386	31.817	Bifunctional methylenetetrahydrofolate dehydrogenase/cyclohydrolase, mitochondrial;NAD-dependent methylenetetrahydrofolate dehydrogenase;Methenyltetrahydrofolate cyclohydrolase	Nmdmc	180		carbohydrate metabolic process [GO:0005975];tetrahydrofolate interconversion [GO:0035999];tetrahydrofolate metabolic process [GO:0046653]";"10-formyltetrahydrofolate metabolic process [GO:0009256]	mitochondrion [GO:0005739]	methenyltetrahydrofolate cyclohydrolase activity [GO:0004477];methylenetetrahydrofolate dehydrogenase (NAD+) activity [GO:0004487];methylenetetrahydrofolate dehydrogenase (NADP+) activity [GO:0004488];methylenetetrahydrofolate dehydrogenase (NADP+) activity [GO:0004488]";phosphate ion binding [GO:0042301]";"magnesium ion binding [GO:0000287];"methenyltetrahydrofolate cyclohydrolase activity [GO:0…	22	22	77.2	32.814	0	323.31	38916000000	473	0.975475	0.268108	0.947332	-0.27711	0.232392	-0.067653	0.939942	-0.312736	1.53649	-0.443614	0.947332	-0.27711	0.737619	-0.209457
27.9201	29.745	26.7144	28.5543	28.8757	28.2927	28.4532	30.1816	25.5428	29.1564	28.6489	27.1791	29.0012	27.0012	27.8103	26.9484	28.4536	25.4878	27.623	29.2914	24.9824			181			integral component of membrane [GO:0016021]		20	20	23	107.14	0	52.56	3715800000	94	0.184683	0.695529	0.472403	1.05142	0.0778485	-0.335688	0.367791	0.833906	0.15398	0.760244	0.472403	1.05142	0.864758	1.38711
24.2215	NaN	NaN	NaN	NaN	NaN	NaN	NaN	NaN	24.2263	NaN	23.7046	24.4809	24.1993	23.7011	NaN	23.6067	23.8685	NaN	NaN	NaN			182		regulation of transcription, DNA-templated [GO:0006355]	nucleus [GO:0005634]	DNA-binding transcription factor activity [GO:0003700];transcription regulatory region sequence-specific DNA binding [GO:0000976];zinc ion binding [GO:0008270]";"DNA binding [GO:0003677]	2	2	2.6	93.157	0.0062418	1.5034	76303000	3	0.553072	0.457552	0	NaN	0	NaN	0	NaN	-4.34294e-08	0	0	NaN	0	0.483929
35.5662	35.6907	35.5689	35.4353	35.4622	35.4929	35.5502	35.8089	35.6202	35.2419	35.4735	35.3555	35.6854	35.765	35.6907	35.539	35.3918	35.6864	35.5989	35.6838	35.5009	Nucleoprotein TPR	Mtor	183		chromatin remodeling [GO:0006338];germ-line stem-cell niche homeostasis [GO:0060250];male germ-line stem cell asymmetric division [GO:0048133];mitotic spindle assembly checkpoint [GO:0007094];mitotic spindle elongation [GO:0000022];mRNA transport [GO:0051028];positive regulation of cell division [GO:0051781];positive regulation of intracellular protein transport [GO:0090316];positive regulation o…	cytoplasm [GO:0005737];metaphase plate [GO:0070090];midbody [GO:0030496];mitotic spindle [GO:0072686];nuclear envelope [GO:0005635];nuclear euchromatin [GO:0005719];nuclear inclusion body [GO:0042405];nuclear lamina [GO:0005652];nuclear matrix [GO:0016363];nuclear membrane [GO:0031965];nuclear periphery [GO:0034399];nuclear pore [GO:0005643];nucleolus [GO:0005730];nucleoplasm [GO:0005654];nucleus…	ribonucleoprotein complex binding [GO:0043021];structural constituent of nuclear pore [GO:0017056]";"chromatin DNA binding [GO:0031490]	200	200	62.8	262.35	0	323.31	589720000000	4956	0.117891	0.894755	0.396221	-0.0585181	0.215415	-0.0555026	0.177925	-0.0591908	0.280307	0.0652224	0.396221	-0.0585181	0.0129975	-0.00301552
31.8	31.8492	31.9374	31.7223	31.4888	31.5626	31.9242	32.1657	32.0742	32.3191	32.2012	32.2094	32.1116	31.821	31.7823	32.2287	31.7283	32.1577	31.819	31.7439	31.8627	Maternal protein pumilio	pum	184		behavioral response to ethanol [GO:0048149];cell migration [GO:0016477];chemical synaptic transmission [GO:0007268];dendrite morphogenesis [GO:0048813];germ cell development [GO:0007281];germ-line stem cell division [GO:0042078];head involution [GO:0008258];long-term memory [GO:0007616];mitotic cell cycle [GO:0000278];modulation of chemical synaptic transmission [GO:0050804];negative regulation o…	muscle cell postsynaptic specialization [GO:0097482];neuromuscular junction [GO:0031594];nuclear envelope [GO:0005635];type Ib terminal bouton [GO:0061176];type Is terminal bouton [GO:0061177]";"cytoplasm [GO:0005737]	RNA binding [GO:0003723];translation repressor activity, mRNA regulatory element binding [GO:0000900]";"mRNA 3'-UTR binding [GO:0003730];RNA binding [GO:0003723]	37	37	29.4	157.53	0	323.31	45205000000	617	1.49089	0.14012	0.33442	-0.0818224	0.648199	0.229692	1.05333	0.265545	1.45618	0.246134	0.33442	-0.0818224	1.1611	-0.311514
31.5419	31.4627	31.4776	31.111	31.016	31.1499	30.9942	31.0335	31.1913	30.9093	31.1152	31.1639	30.969	31.1881	31.1405	31.1659	31.0859	31.2482	30.9557	31.0702	31.3592		Drep2;Drep-2	185		negative regulation of neuron death [GO:1901215];nucleic acid phosphodiester bond hydrolysis [GO:0090305]";"apoptotic process [GO:0006915]	postsynaptic membrane [GO:0045211];synaptic membrane [GO:0097060]";"intracellular [GO:0005622]	hydrolase activity [GO:0016787]	24	24	43.2	51.852	0	323.31	26663000000	368	0.621791	0.490987	0.486124	0.164805	0.107199	0.0382786	0.17863	-0.0473576	0.154089	-0.0553773	0.486124	0.164805	0.407655	0.126526
29.3442	28.3573	28.288	28.5347	28.7128	27.8676	28.5701	28.8265	28.6825	28.7937	28.8632	27.8632	28.2698	28.4122	28.0776	26.8471	28.6591	27.1248	25.733	28.7264	27.5152	Alpha-mannosidase;Alpha-mannosidase 2	alpha-Man-II	186		mannose metabolic process [GO:0006013];N-glycan processing [GO:0006491];protein deglycosylation [GO:0006517];protein glycosylation [GO:0006486];rhodopsin biosynthetic process [GO:0016063]";"encapsulation of foreign target [GO:0035010];mannose metabolic process [GO:0006013]	Golgi membrane [GO:0000139];Golgi stack [GO:0005795];integral component of membrane [GO:0016021]";"endoplasmic reticulum [GO:0005783]	carbohydrate binding [GO:0030246];mannosidase activity [GO:0015923];mannosyl-oligosaccharide 1,3-1,6-alpha-mannosidase activity [GO:0004572];metal ion binding [GO:0046872]";"alpha-mannosidase activity [GO:0004559]	25	25	30.9	126.85	0	58.163	3602600000	120	1.03833	0.157571	0.977721	1.19255	0.0741486	0.21881	0.884581	1.05505	0.716843	1.36816	0.977721	1.19255	1.10598	0.973737
25.7757	26.7601	NaN	25.5917	26.6468	NaN	25.2777	26.5523	24.3153	25.7315	27.4844	NaN	25.5272	NaN	NaN	25.8783	27.3614	NaN	23.7232	26.5326	NaN			187			integral component of membrane [GO:0016021]		1	1	3	49.321	0	19.156	441890000	19	0.241107	0.626081	0.477206	1.06566	0.349934	1.49196	0.338925	1.11979	0.0645792	0.253884	0.477206	1.06566	0.267678	-0.4263
35.0982	34.9797	35.3988	35.4235	34.8633	35.296	35.5625	35.2803	35.4136	34.8857	35.1785	35.3617	34.6607	35.2137	35.2381	35.2306	35.0099	35.3803	35.3686	34.9513	35.4738	26S proteasome non-ATPase regulatory subunit 7	Rpn8	188		proteasome-mediated ubiquitin-dependent protein catabolic process [GO:0043161]	dendrite [GO:0030425];nucleoplasm [GO:0005654];proteasome complex [GO:0000502];proteasome regulatory particle [GO:0005838];proteasome regulatory particle, lid subcomplex [GO:0008541]";"cytosol [GO:0005829];proteasome regulatory particle [GO:0005838]		31	31	80.8	38.089	0	323.31	452580000000	1568	0.390396	0.597863	0.202609	-0.0879981	0.108202	-0.057635	0.41499	-0.174842	0.3586	0.154205	0.202609	-0.0879981	0.0703628	-0.0303631
27.52	27.2636	26.9838	27.8461	26.882	26.696	28.0977	27.6103	27.4687	27.0926	27.7426	26.4108	27.5376	27.2221	27.398	27.3087	28.4033	27.2745	27.2584	27.1489	27.7048	UPF0598 protein CG30010	CG30010	189		wound healing [GO:0042060]			5	5	47.3	19.664	0	87.435	2018300000	64	0.43134	0.498365	0.253059	-0.172144	0.288766	0.291455	0.179887	-0.136781	0.625339	0.354867	0.253059	-0.172144	0.636082	-0.463599
NaN	NaN	NaN	NaN	NaN	NaN	NaN	NaN	NaN	24.056	25.041	25.0626	26.0828	25.6818	24.9461	NaN	NaN	NaN	NaN	NaN	NaN			190		Golgi to plasma membrane protein transport [GO:0043001];protein localization to Golgi apparatus [GO:0034067]";"Golgi to endosome transport [GO:0006895]	integral component of Golgi membrane [GO:0030173];trans-Golgi network [GO:0005802]";"cytosol [GO:0005829]		1	1	7.5	18.159	0.0034994	1.9341	176410000	5	0	1	-4.34294e-08	0	-4.34294e-08	0	0	NaN	-4.34294e-08	0	-4.34294e-08	0	-4.34294e-08	0
26.9434	24.6303	25.3681	26.0997	24.9115	25.4991	24.875	24.0986	24.257	25.313	25.3069	NaN	NaN	NaN	24.4709	26.1674	26.1054	26.2245	NaN	24.0159	25.5862	Cysteine-rich DPF motif domain-containing protein 1	CG11755	191					3	3	30.5	17.872	0.00018308	7.2381	468690000	20	1.24815	0.107052	0.484072	0.774328	0.988914	1.36471	0.118735	0.229243	0.225082	-0.390838	0.484072	0.774328	0.555159	-0.590382
28.7921	29.2207	29.6375	29.5057	29.1024	28.7666	29.508	29.6749	30.0574	29.689	29.7223	29.8816	29.7914	29.7776	29.5928	29.5214	30.0272	29.9732	29.7927	29.2007	29.1501	Aryl hydrocarbon receptor nuclear translocator homolog	tgo	192	+	cellular response to hypoxia [GO:0071456];cellular response to insulin stimulus [GO:0032869];central nervous system development [GO:0007417];glial cell migration [GO:0008347];insulin receptor signaling pathway [GO:0008286];limb development [GO:0060173];negative regulation of transcription by RNA polymerase II [GO:0000122];oogenesis [GO:0048477];positive regulation of transcription by RNA polymera…	nucleus [GO:0005634];protein-containing complex [GO:0032991];RNA polymerase II transcription factor complex [GO:0090575]";transcription factor complex [GO:0005667]";"cytoplasm [GO:0005737]	DNA-binding transcription factor activity [GO:0003700];myosin binding [GO:0017022];protein dimerization activity [GO:0046983]";protein heterodimerization activity [GO:0046982];proximal promoter DNA-binding transcription activator activity, RNA polymerase II-specific [GO:0001077];sequence-specific DNA binding [GO:0043565];transcription factor activity, RNA polymerase II distal enhancer sequence-sp…	16	16	31.5	71.474	0	323.31	9958800000	195	2.03906	0.0479779	0.362592	-0.210352	0.813891	0.459447	1.35661	0.361272	0.626437	0.365599	0.362592	-0.210352	1.57962	-0.669799
29.0977	29.0732	27.943	27.7877	28.635	27.8162	27.4155	27.0244	26.8286	28.8291	28.3969	28.4476	28.9747	28.4111	28.3525	28.9361	29.6586	28.2385	28.8174	28.9567	27.2887	JmjC domain-containing histone demethylation protein 1	Kdm2	193	+	histone H3-K36 demethylation [GO:0070544];histone H3-K4 demethylation, trimethyl-H3-K4-specific [GO:0034721];larval somatic muscle development [GO:0007526];SCF-dependent proteasomal ubiquitin-dependent protein catabolic process [GO:0031146];segment specification [GO:0007379]";"histone H2A ubiquitination [GO:0033522]	PcG protein complex [GO:0031519];SCF ubiquitin ligase complex [GO:0019005]";"nucleus [GO:0005634]	histone demethylase activity (H3-K36 specific) [GO:0051864];histone demethylase activity (H3-trimethyl-K4 specific) [GO:0034647];methyltransferase activity [GO:0008168];zinc ion binding [GO:0008270]";"DNA binding [GO:0003677]	25	25	23.6	146.18	0	73.956	4067900000	113	1.9859	0.035921	0.0255701	0.0378647	0.366175	0.590128	0.226385	0.214388	1.0585	-1.26475	0.0255701	0.0378647	0.574467	-0.552263
29.4736	30.3859	29.6458	29.0875	29.12	28.0985	29.1151	28.6929	28.9913	29.5983	29.3202	29.2402	29.1657	29.2463	29.3506	29.1663	29.121	29.0004	29.2983	29.2977	28.7413	Probable lysine-specific demethylase 4B	Kdm4B	194		histone H3-K36 demethylation [GO:0070544];histone H3-K9 demethylation [GO:0033169];negative regulation of transcription, DNA-templated [GO:0045892]";"histone demethylation [GO:0016577]	nucleus [GO:0005634]";"histone methyltransferase complex [GO:0035097];nucleus [GO:0005634]	DNA-binding transcription repressor activity, RNA polymerase II-specific [GO:0001227];histone demethylase activity (H3-K36 specific) [GO:0051864];histone demethylase activity (H3-K9 specific) [GO:0032454];histone demethylase activity [GO:0032452];metal ion binding [GO:0046872];methylated histone binding [GO:0035064];methyltransferase activity [GO:0008168]";proximal promoter DNA-binding transcript…	28	27	42.1	80.433	0	234.36	7336200000	199	0.137107	0.804398	0.156593	0.189431	0.0289197	-0.0165221	0.673544	0.207798	0.329705	-0.179329	0.156593	0.189431	0.178694	0.205953
28.4864	28.2954	28.1758	27.8538	27.7948	27.3383	27.3125	28.3993	27.7681	27.7997	28.0766	28.5251	29.6009	28.8474	29.3652	28.8306	29.2561	29.1545	28.1483	27.6784	27.3178		RanBPM	195	+				31	1	47.9	84.152	0.0030055	1.9848	5453500000	39	1.93893	0.0399133	0.422809	0.275959	2.12881	1.36559	1.18803	0.987671	0.101357	0.111821	0.422809	0.275959	2.37978	-1.08963
29.3708	28.7348	28.7128	28.7878	28.5611	28.048	28.7022	28.7195	28.0434	28.6911	28.8516	28.1842	28.7353	28.6653	28.4188	27.0578	28.4989	28.2908	28.9337	28.6047	28.587	Katanin p60 ATPase-containing subunit A1	Kat60	196		cell division [GO:0051301];cytoplasmic microtubule organization [GO:0031122];dendrite development [GO:0016358];microtubule depolymerization [GO:0007019];microtubule severing [GO:0051013];microtubule-based process [GO:0007017];mitotic sister chromatid segregation [GO:0000070];negative regulation of cell migration [GO:0030336];neuron remodeling [GO:0016322];positive regulation of dendrite morphogen…	cell leading edge [GO:0031252];centrosome [GO:0005813];chromosome [GO:0005694];cytoplasmic microtubule [GO:0005881];katanin complex [GO:0008352];microtubule [GO:0005874];microtubule associated complex [GO:0005875];spindle pole [GO:0000922]";"cell cortex [GO:0005938];"centrosome [GO:0005813]	ATP binding [GO:0005524];microtubule binding [GO:0008017];microtubule-severing ATPase activity [GO:0008568];microtubule-severing ATPase activity [GO:0008568]";myosin binding [GO:0017022]";"ATP binding [GO:0005524];"ATPase activity [GO:0016887]	24	24	47.7	63.272	0	134.8	4320600000	138	0.789052	0.277676	0.00751457	-0.00589371	0.752444	-0.759292	0.303818	-0.117391	0.369014	-0.220061	0.00751457	-0.00589371	1.02743	0.753398
29.178	28.7975	28.5078	28.7181	28.5109	27.9618	28.6095	28.4563	27.9031	27.6945	28.374	28.0353	28.7818	28.7557	29.5856	28.9969	28.5707	28.35	28.7285	28.2752	28.4379	Transcription initiation factor TFIID subunit 12	Taf12	197		RNA polymerase II preinitiation complex assembly [GO:0051123];transcription initiation from RNA polymerase II promoter [GO:0006367]";"histone H3 acetylation [GO:0043966];DNA-templated transcription, initiation [GO:0006352]	SAGA complex [GO:0000124];SLIK (SAGA-like) complex [GO:0046695];transcription factor TFIID complex [GO:0005669]";"nucleus [GO:0005634];"SAGA complex [GO:0000124]	protein heterodimerization activity [GO:0046982];protein heterodimerization activity [GO:0046982]";protein homodimerization activity [GO:0042803];RNA polymerase II activating transcription factor binding [GO:0001102];TBP-class protein binding [GO:0017025];transcription factor binding [GO:0008134]";"DNA binding [GO:0003677];"histone acetyltransferase activity [GO:0004402]	7	7	44.4	17.63	0	29.948	4553600000	75	0.038995	0.941824	0.206232	0.131851	0.275039	0.158689	0.0498488	0.0573117	0.247126	-0.157546	0.206232	0.131851	0.0344162	-0.0268377
NaN	27.4989	NaN	NaN	27.3163	NaN	NaN	27.6913	NaN	27.846	NaN	NaN	NaN	NaN	NaN	NaN	NaN	NaN	NaN	NaN	NaN	Polycomb protein Asx	Asx	198		antennal development [GO:0007469];apposition of dorsal and ventral imaginal disc-derived wing surfaces [GO:0007475];cell fate determination [GO:0001709];monoubiquitinated histone H2A deubiquitination [GO:0035522];negative regulation of transcription, DNA-templated [GO:0045892];positive regulation of transcription by RNA polymerase II [GO:0045944];positive regulation of transcription, DNA-template…	nucleus [GO:0005634];PR-DUB complex [GO:0035517]";"chromatin [GO:0000785]	deubiquitinase activator activity [GO:0035800];DNA binding [GO:0003677];metal ion binding [GO:0046872]";"chromatin binding [GO:0003682];DNA binding [GO:0003677]	2	2	3.9	166.19	0.0044761	1.7476	1035100000	2	NaN	NaN	0	NaN	-4.34294e-08	0	0	NaN	0	NaN	0	NaN	0	NaN
NaN	NaN	NaN	23.545	NaN	NaN	NaN	NaN	NaN	26.0475	NaN	NaN	NaN	NaN	23.1826	NaN	NaN	23.874	NaN	NaN	NaN		CG6923-RB	199		ubiquitin-dependent protein catabolic process [GO:0006511]";"ubiquitin-dependent ERAD pathway [GO:0030433]		zinc ion binding [GO:0008270]";"ubiquitin protein ligase activity [GO:0061630];zinc ion binding [GO:0008270]	4	4	6.8	138.67	0.00017646	4.4146	88354000	7	NaN	NaN	0	NaN	0	NaN	0	NaN	-4.34294e-08	0	0	NaN	0	-0.329006
29.6615	29.8342	28.6234	29.1113	29.5996	28.5177	29.1924	29.0408	28.2778	28.7256	28.7583	28.2571	29.5262	27.0428	28.0059	27.1354	28.9481	26.1579	28.6206	28.5532	27.1129	Histone-lysine N-methyltransferase, H3 lysine-79 specific	gpp	200		chromatin silencing [GO:0006342];chromatin silencing at telomere [GO:0006348];DNA damage checkpoint [GO:0000077];histone H3-K79 methylation [GO:0034729];histone methylation [GO:0016571];positive regulation of gene silencing by miRNA [GO:2000637];regulation of cell cycle [GO:0051726]";regulation of transcription regulatory region DNA binding [GO:2000677]";"chromatin silencing [GO:0006342];"chromat…	chromosome, telomeric region [GO:0000781];histone methyltransferase complex [GO:0035097];nucleus [GO:0005634]";"chromosome, centromeric region [GO:0000775];nucleus [GO:0005634]	histone methyltransferase activity (H3-K79 specific) [GO:0031151]	37	37	21.4	206.53	0	95.447	4556300000	175	1.19018	0.118608	1.34136	1.12906	0.288791	-0.681747	0.193276	0.290459	0.582802	0.741433	1.34136	1.12906	1.61792	1.8108
30.6887	30.3181	29.9113	30.2495	29.8374	29.8462	30.0275	30.1787	29.9889	28.95	28.992	28.9462	29.9475	29.9224	30.0634	30.2919	30.473	30.7165	30.3332	30.5637	30.0859		Drep1;Drep-1	202	+	negative regulation of apoptotic process [GO:0043066];nurse cell apoptotic process [GO:0045476];regulation of apoptotic process [GO:0042981]";"apoptotic DNA fragmentation [GO:0006309]	intracellular [GO:0005622]	deoxyribonuclease inhibitor activity [GO:0060703]	13	13	42.8	31.985	0	323.31	12998000000	209	2.03178	0.0399383	0.366362	-0.185738	0.377252	0.166177	1.37498	-0.857355	0.8121	-0.262593	0.366362	-0.185738	0.82212	-0.351915
NaN	NaN	NaN	22.8958	NaN	NaN	NaN	NaN	NaN	24.8865	24.5859	25.0038	NaN	NaN	25.0342	NaN	NaN	25.8484	NaN	24.7573	NaN	Tetraspanin	Tsp86D	203		cell surface receptor signaling pathway [GO:0007166];nervous system development [GO:0007399];positive regulation of Notch signaling pathway [GO:0045747]";"border follicle cell migration [GO:0007298]	integral component of plasma membrane [GO:0005887]";"integral component of membrane [GO:0016021];integral component of membrane [GO:0016021]		3	3	11.7	33.213	0.001018	2.5014	167450000	4	0	1	0	-1.86154	0	1.09112	0	0.120307	0	NaN	0	-1.86154	0	-2.95266
33.2818	32.354	32.8316	32.7746	32.481	32.3636	32.3717	32.5712	32.9601	32.2664	32.2208	32.8961	31.473	32.8801	32.0106	32.4808	32.4457	32.5572	32.8987	32.1931	32.6116	J domain-containing protein CG6693	CG6693	204			nucleus [GO:0005634]";"cytoplasm [GO:0005737]	heat shock protein binding [GO:0031072]	19	19	60.9	34.889	0	323.31	70911000000	532	0.272166	0.65038	0.175839	0.113309	0.129651	-0.0732358	0.341366	-0.276639	0.0882351	0.0665296	0.175839	0.113309	0.382833	0.186545
27.8235	29.1106	28.3611	28.3689	28.9965	27.3578	28.3299	28.5922	27.4362	28.3037	29.0589	27.9156	28.7354	27.1593	28.5168	27.0947	29.4995	28.0733	28.89	29.025	28.8143	Kinesin-like protein	Khc-73	205		microtubule-based movement [GO:0007018];regulation of synapse structure or activity [GO:0050803]";"establishment of spindle orientation [GO:0051294]	kinesin complex [GO:0005871];microtubule [GO:0005874];microtubule plus-end [GO:0035371]";"early endosome [GO:0005769]	ATP binding [GO:0005524];microtubule binding [GO:0008017];microtubule motor activity [GO:0003777];protein homodimerization activity [GO:0042803]";"ATP binding [GO:0005524];"ATPase activity [GO:0016887]	32	32	20	212.39	0	143.95	5241500000	165	0.164053	0.746805	0.702522	-0.573366	0.417569	-0.687298	0.785886	-0.628134	1.04502	-0.790367	0.702522	-0.573366	0.0671373	0.113933
32.1907	32.2183	32.0858	32.1154	32.1688	31.789	31.7965	31.7893	31.5358	31.9795	32.0593	31.9203	31.9816	31.7388	31.8098	31.8001	31.7651	32.0879	31.6478	32.044	31.7504	Putative elongator complex protein 1	Elp1	206		regulation of transcription by RNA polymerase II [GO:0006357];tRNA wobble uridine modification [GO:0002098]";"dosage compensation by hyperactivation of X chromosome [GO:0009047];tRNA wobble uridine modification [GO:0002098]	Elongator holoenzyme complex [GO:0033588];nucleus [GO:0005634]";transcription elongation factor complex [GO:0008023]";"cytoplasm [GO:0005737]	phosphorylase kinase regulator activity [GO:0008607];transferase activity [GO:0016740]	57	57	48.9	142.88	0	323.31	47265000000	673	1.58414	0.143858	1.25929	0.280595	0.16939	0.0702731	0.430071	0.100822	0.295899	-0.106874	1.25929	0.280595	0.953387	0.210322
29.1271	28.4347	27.9459	29.2403	28.8066	28.2064	27.7887	28.209	26.7887	29.0272	28.8171	27.7848	27.9907	28.4497	28.2946	24.4653	28.1827	28.5949	27.3001	27.4154	27.4444			207		thiamine metabolic process [GO:0006772]";"thiamine diphosphate biosynthetic process [GO:0009229]		thiamine binding [GO:0030975];thiamine diphosphokinase activity [GO:0004788]";"ATP binding [GO:0005524]	13	13	58.9	30.66	0	60.583	3346800000	108	0.911551	0.188539	2.28307	1.24019	0.082243	-0.305655	2.01943	1.0074	0.188553	0.208838	2.28307	1.24019	0.871402	1.54584
34.6026	34.3546	34.911	35.0148	33.9676	34.3761	34.6869	34.4452	35.3196	34.1246	34.1161	34.6882	34.0926	34.6154	34.3912	34.9346	34.7009	35.238	35.26	34.6924	35.5803	Cytochrome c oxidase subunit 5A, mitochondrial	CoVa	208		negative regulation of neuroblast proliferation [GO:0007406];positive regulation of cell cycle [GO:0045787]";"mitochondrial electron transport, cytochrome c to oxygen [GO:0006123]	mitochondrion [GO:0005739]";"mitochondrial respiratory chain complex IV [GO:0005751];mitochondrial inner membrane [GO:0005743]	metal ion binding [GO:0046872]";"cytochrome-c oxidase activity [GO:0004129];cytochrome-c oxidase activity [GO:0004129]	10	10	57.7	16.622	0	323.31	334020000000	763	1.54118	0.0878096	1.21011	-0.63983	0.29418	-0.219741	2.05802	-0.83959	0.417043	-0.360364	1.21011	-0.63983	0.848664	-0.420089
27.0157	25.6898	24.965	NaN	NaN	NaN	25.6642	25.086	25.099	25.8737	25.0012	NaN	26.479	NaN	25.7044	26.1056	26.2926	26.6044	NaN	NaN	NaN		CtBP	209				hydroxypyruvate reductase activity [GO:0016618];NAD binding [GO:0051287]";"glyoxylate reductase (NADP) activity [GO:0030267]	31	1	59.5	50.699	0	19.475	354800000	11	0.514689	0.406534	0	NaN	0	NaN	0	NaN	0	NaN	0	NaN	0.290695	-0.444041
26.4341	25.3167	26.0731	26.0692	25.1589	25.478	NaN	NaN	NaN	24.804	24.4465	25.1073	NaN	NaN	24.0732	NaN	NaN	NaN	NaN	NaN	25.1344		GstS1	210	+			glutathione transferase activity [GO:0004364]";"glutathione peroxidase activity [GO:0004602]	25	1	79.6	27.78	0.00018142	6.4326	258500000	6	2.19461	0.0447678	0	0.620601	0	NaN	0	-0.526605	0	NaN	0	0.620601	0	NaN
29.0789	28.4575	29.0294	29.7035	29.3226	29.6499	29.2056	29.4533	30.1119	29.2935	28.4635	29.5735	29.452	29.4517	29.7478	28.1179	29.1398	28.8726	28.5724	28.418	28.6804		qkr54B	211			cytoplasm [GO:0005737]	RNA binding [GO:0003723]	12	12	38.8	46.496	0	82.872	7858000000	105	1.34672	0.10917	1.27156	0.650067	0.185411	0.153175	1.59089	0.773417	1.67284	1.03334	1.27156	0.650067	0.725005	0.496892
NaN	NaN	NaN	NaN	22.8539	NaN	NaN	NaN	NaN	NaN	NaN	NaN	25.5452	23.8759	23.6147	NaN	25.1344	25.0301	NaN	23.0518	NaN		Ada2b	212		regulation of transcription by RNA polymerase II [GO:0006357]";"regulation of histone acetylation [GO:0035065]	nucleus [GO:0005634]	transcription coactivator activity [GO:0003713];transferase activity, transferring acyl groups [GO:0016746];zinc ion binding [GO:0008270]";"DNA binding [GO:0003677]	12	1	32.3	48.316	0.0041521	1.8074	69953000	4	0.381645	0.503392	0	-0.197836	0	2.03047	0	1.2935	0	NaN	0	-0.197836	0	-2.2283
29.3464	29.9088	29.1835	29.5871	29.6981	29.4521	29.5262	29.6717	29.4994	29.8395	30.0148	29.4375	29.8496	29.2748	29.4095	29.8967	29.482	29.6934	29.8101	29.9739	29.5835	E3 ubiquitin-protein ligase Smurf1	lack	213		embryonic development via the syncytial blastoderm [GO:0001700];embryonic hindgut morphogenesis [GO:0048619];germarium-derived egg chamber formation [GO:0007293];negative regulation of BMP signaling pathway [GO:0030514];negative regulation of gene expression [GO:0010629];negative regulation of hippo signaling [GO:0035331];positive regulation of protein catabolic process [GO:0045732];proteasome-me…	cytosol [GO:0005829];ubiquitin ligase complex [GO:0000151]";"cytoplasm [GO:0005737]	ubiquitin-protein transferase activity [GO:0004842]";"ligase activity [GO:0016874];"ubiquitin protein ligase activity [GO:0061630]	30	29	35.5	115.67	0	179.85	8657800000	230	0.202901	0.768512	0.7606	-0.259804	0.234847	-0.0984478	0.336352	-0.151554	0.826956	-0.22339	0.7606	-0.259804	0.416807	-0.161356
28.2039	27.6496	26.9352	28.2579	27.4688	26.672	28.0978	28.141	27.1015	28.1549	27.6608	26.451	27.9335	26.3893	27.6122	26.1639	27.9644	27.111	27.5883	27.3319	26.906	Uncharacterized protein CG5098	CG5098	214		positive regulation of transcription by RNA polymerase II [GO:0045944]	nucleus [GO:0005634]	metal ion binding [GO:0046872];transcription regulatory region DNA binding [GO:0044212]";"DNA-binding transcription factor activity [GO:0003700];metal ion binding [GO:0046872]	16	16	14.9	143.43	0	52.376	2066700000	77	0.122106	0.80832	0.259287	0.255836	0.128962	-0.195596	0.0697169	0.0915909	0.570346	0.504712	0.259287	0.255836	0.387354	0.451432
26.449	25.3367	NaN	26.6047	25.5385	25.8015	NaN	NaN	24.5111	NaN	NaN	NaN	NaN	NaN	NaN	NaN	25.4465	NaN	NaN	NaN	NaN		Jabba	215			plasma membrane [GO:0005886]";"lipid droplet [GO:0005811]		31	2	62.4	43.069	0.00018215	6.7746	227580000	8	0	1	0	NaN	0	NaN	-4.34294e-08	0	0	NaN	0	NaN	0	0.499569
27.3586	26.4341	26.3577	25.3662	27.7272	25.6588	27.5686	26.8503	25.5459	26.4647	26.5342	26.3116	26.0162	25.8871	25.1749	26.5192	27.3132	26.052	27.2454	26.4454	26.1412			216					5	5	20.1	28.107	0	17.594	1064000000	31	0.14177	0.777077	0.0775974	-0.126945	0.011651	0.0174376	0.735839	-0.545895	0.0217866	0.0442333	0.0775974	-0.126945	0.0876153	-0.144383
31.14	31.2761	31.4367	30.8588	31.1277	30.9354	30.6151	30.5771	31.251	31.2704	30.73	31.1008	31.3742	31.0493	30.9364	31.3659	30.7342	31.0988	31.0709	30.7652	31.2454	Serine/threonine-protein kinase hippo	hpo	217		activation of protein kinase activity [GO:0032147];border follicle cell migration [GO:0007298];eye development [GO:0001654];hippo signaling [GO:0035329];intrinsic apoptotic signaling pathway in response to DNA damage by p53 class mediator [GO:0042771];morphogenesis of an epithelial sheet [GO:0002011];negative regulation of canonical Wnt signaling pathway [GO:0090090];negative regulation of cell p…	apical plasma membrane [GO:0016324];cell-cell junction [GO:0005911];cytoplasm [GO:0005737];cytosol [GO:0005829];membrane [GO:0016020]";"apical cortex [GO:0045179]	protein homodimerization activity [GO:0042803];protein kinase C activity [GO:0004697]";protein serine/threonine kinase activity [GO:0004674]";"ATP binding [GO:0005524]	32	32	52.6	75.109	0	323.31	26605000000	449	0.249226	0.711868	0.270205	0.101965	0.0587463	0.0391502	0.111679	0.0496966	0.338395	-0.212736	0.270205	0.101965	0.136665	0.0628147
28.0599	27.2042	29.2652	27.5742	27.1867	26.0987	26.8151	27.8418	26.6645	27.756	27.3258	26.6518	30.0417	26.6352	27.0197	26.3939	27.4969	26.7501	27.4386	26.6763	26.4792		f-cup	218			cytoplasm [GO:0005737]		13	13	22.9	73.198	0	53.176	1964500000	30	0.143815	0.765837	0.490756	0.700146	0.0117767	0.0156015	0.397385	0.707019	0.197726	0.24245	0.490756	0.700146	0.471597	0.684544
28.6088	28.1022	27.3239	27.9722	27.8309	26.7078	27.3848	27.7217	27.5818	28.0813	27.0675	26.5528	27.1484	26.7381	27.9102	26.6359	27.8143	NaN	27.5195	27.7288	26.5712			219		mitochondrial respiratory chain complex assembly [GO:0033108]	mitochondrial intermembrane space [GO:0005758]		3	3	55.4	7.5977	0	40.007	2261500000	50	0.217037	0.681144	0.486788	0.484454	0.024796	-0.0480617	0.0182957	-0.0234515	0.321638	0.289563	0.486788	0.484454	0.417034	0.532516
27.3134	27.2791	28.3701	26.7137	26.6169	26.6071	26.621	26.9617	27.1195	27.7138	25.0152	27.2259	26.4446	27.4764	25.9679	27.1799	26.5051	28.4604	25.6382	25.8839	26.6197		CtBP	220				hydroxypyruvate reductase activity [GO:0016618];NAD binding [GO:0051287]";"glyoxylate reductase (NADP) activity [GO:0030267]	31	1	72.8	41.344	0	94.636	1578500000	28	0.555692	0.36838	1.35919	1.10278	0.969537	1.33451	0.409938	0.59335	1.21685	0.853463	1.35919	1.10278	0.162733	-0.231731
32.9407	32.7798	33.1913	32.9215	32.4728	32.6966	32.4482	32.5957	32.924	32.7595	32.6576	32.4909	32.317	32.903	32.3945	32.6191	32.2045	32.4812	32.4953	32.3835	32.6666		CG3499-RC	221		mitochondrial fusion [GO:0008053];mitochondrial protein processing [GO:0034982]";"cristae formation [GO:0042407]	mitochondrial inner membrane [GO:0005743];mitochondrion [GO:0005739]";"integral component of membrane [GO:0016021]	metalloendopeptidase activity [GO:0004222]";"ATP binding [GO:0005524]	53	53	63.2	80.65	0	323.31	77972000000	899	0.879249	0.305166	1.09676	0.318638	0.211323	-0.0801735	0.19726	0.0719636	0.360259	0.140816	1.09676	0.318638	1.32054	0.398811
30.4963	29.8471	29.8603	29.4038	29.0484	29.1633	29.4576	29.9005	29.4921	30.0619	30.0113	30.0698	30.0609	29.9942	30.2158	29.244	29.3796	29.4256	29.7281	29.1662	29.0307	RPII140-upstream gene protein	140up	222		multicellular organism development [GO:0007275]	integral component of membrane [GO:0016021]		10	10	31	29.182	0	144.52	10318000000	177	1.51504	0.0936265	0.4183	0.328209	0.0654614	0.0414066	2.88364	0.760649	0.529338	0.30841	0.4183	0.328209	0.391161	0.286802
35.6781	35.5989	35.7661	35.6665	35.5392	35.5441	35.525	35.5112	35.473	35.3863	35.4265	35.3881	35.9264	36.1405	35.786	35.3385	35.552	35.3871	35.5707	35.6588	35.559	Histone H4	His4r;His4	223		female meiosis chromosome segregation [GO:0016321];nucleosome assembly [GO:0006334]";"DNA-templated transcription, initiation [GO:0006352]	nuclear chromosome [GO:0000228];nucleosome [GO:0000786];nucleus [GO:0005634]";RCAF complex [GO:0035059]";"chromosome [GO:0005694];"nucleosome [GO:0000786]	histone binding [GO:0042393];protein heterodimerization activity [GO:0046982]";"DNA binding [GO:0003677]	19	19	62.1	11.381	0	323.31	644880000000	1758	0.394668	0.620057	0.263735	0.0359472	1.11387	-0.170306	0.158621	0.07945	1.24492	-0.0931384	0.263735	0.0359472	1.7342	0.206253
29.3625	29.7538	29.3443	29.7063	29.8323	30.035	29.2887	28.7656	28.7131	29.4391	29.2446	28.6253	28.9964	28.2472	29.0683	28.3672	29.1243	29.2635	28.8028	27.8343	28.7993	Acylphosphatase-2	Acyp2	224	+	cellular metabolic process [GO:0044237]	cytoplasm [GO:0005737]	hydrolase activity [GO:0016787]";"acylphosphatase activity [GO:0003998];acylphosphatase activity [GO:0003998]	8	8	78.4	11.765	0	80.19	6081200000	95	2.19721	0.0304563	2.54515	1.19355	0.443205	0.439516	0.671916	0.458008	0.526087	0.443621	2.54515	1.19355	1.75512	0.754034
31.8903	32.1864	32.4702	31.464	31.9296	32.5595	31.7296	30.802	32.1096	32.9183	32.0733	33.1305	32.8027	32.3723	31.9433	31.9266	31.5475	32.5538	32.786	33.4051	32.2186	ARL-6-interacting protein 1 homolog	CG10326	225		endoplasmic reticulum tubular network membrane organization [GO:1990809]	integral component of membrane [GO:0016021]		5	5	22.8	22.233	0	58.223	60181000000	195	1.35928	0.101188	1.17868	-0.71992	0.814731	-0.793974	0.305839	-0.263182	1.14069	-1.25618	1.17868	-0.71992	0.0871349	0.0740534
27.5678	26.838	28.4614	28.4211	28.026	28.3216	27.5759	26.8612	27.78	27.7306	28.1376	28.1123	28.3992	28.1615	28.3548	29.0666	26.9931	28.6423	28.0019	27.1692	28.3952	Serine protease HTRA2, mitochondrial;Serine protease HTRA2, mitochondrial, long;Serine protease HTRA2, mitochondrial, short	HtrA2	226		ectopic germ cell programmed cell death [GO:0035234];mitochondrion organization [GO:0007005];positive regulation of apoptotic process [GO:0043065];positive regulation of cysteine-type endopeptidase activity [GO:2001056];regulation of apoptotic process [GO:0042981];spermatogenesis [GO:0007283]";"apoptotic process [GO:0006915]	integral component of membrane [GO:0016021];mitochondrial intermembrane space [GO:0005758];mitochondrial membrane [GO:0031966];mitochondrion [GO:0005739];Nebenkern [GO:0016006]";"cytosol [GO:0005829]	serine-type endopeptidase activity [GO:0004252]";"peptidase activity [GO:0008233];serine-type endopeptidase activity [GO:0004252]	10	9	27.3	45.999	0	56.408	3461100000	82	0.331728	0.565104	0.0673334	0.0838706	0.200188	0.378569	0.49209	0.293904	0.420055	-0.449704	0.0673334	0.0838706	0.210629	-0.294699
30.5617	30.4409	30.9244	30.281	30.4684	29.842	30.2027	30.5637	29.9119	30.8123	30.8122	30.1819	30.3206	30.1879	29.6381	30.0061	30.7241	30.1657	30.3222	30.8302	30.5354	Serine/threonine-protein kinase receptor	put	227		axon guidance [GO:0007411];compound eye morphogenesis [GO:0001745];dendrite morphogenesis [GO:0048813];dorsal closure [GO:0007391];dorsal/ventral pattern formation [GO:0009953];germ-line stem cell division [GO:0042078];germ-line stem cell population maintenance [GO:0030718];head involution [GO:0008258];Malpighian tubule morphogenesis [GO:0007443];negative regulation of gene expression [GO:0010629…	integral component of plasma membrane [GO:0005887];plasma membrane [GO:0005886];plasma membrane [GO:0005886]";receptor complex [GO:0043235]";"activin receptor complex [GO:0048179]	activin binding [GO:0048185];ATP binding [GO:0005524];growth factor binding [GO:0019838];metal ion binding [GO:0046872];protein kinase activity [GO:0004672];SMAD binding [GO:0046332];transforming growth factor beta receptor activity, type II [GO:0005026];transforming growth factor beta receptor activity, type II [GO:0005026]";transforming growth factor beta-activated receptor activity [GO:0005024…	16	16	39.5	58.648	0	103.84	14836000000	183	0.0877789	0.877481	0.252217	-0.142829	0.429384	-0.263941	0.367709	-0.237085	0.634005	-0.33651	0.252217	-0.142829	0.187011	0.121113
29.484	29.3938	29.3266	28.9454	29.1858	29.6025	29.1239	29.5137	29.6281	29.4041	29.0914	28.6075	28.9948	29.071	28.8889	28.7098	28.8046	28.6378	28.4287	29.0461	29.3169		ear	228		transcription initiation from RNA polymerase II promoter [GO:0006367]";"regulation of transcription, DNA-templated [GO:0006355]	transcription factor TFIID complex [GO:0005669];transcription factor TFIIF complex [GO:0005674]";"ELL-EAF complex [GO:0032783]		18	18	28.8	100.23	0	169.32	7064700000	184	1.71162	0.0791057	0.923391	0.392445	0.328169	-0.213166	0.128488	0.0790389	0.741729	0.49136	0.923391	0.392445	2.42024	0.605611
25.7684	26.5065	25.3997	26.0935	NaN	NaN	25.796	25.364	25.6031	25.1534	26.6906	26.4527	25.458	NaN	NaN	NaN	24.6727	NaN	25.0311	25.6305	NaN		plx	229		cell adhesion mediated by integrin [GO:0033627];intracellular protein transport [GO:0006886];regulation of GTPase activity [GO:0043087]";"activation of GTPase activity [GO:0090630]	Golgi apparatus [GO:0005794]";"cell surface [GO:0009986]	integrin binding [GO:0005178];Rab GTPase binding [GO:0017137]";"GTPase activator activity [GO:0005096]	10	10	9	151.87	0.00017461	3.8582	409260000	13	0.289331	0.60938	0.699909	0.611199	0	-0.658114	0.442267	0.607813	0.376725	0.256841	0.699909	0.611199	0	1.26931
28.9919	29.4525	29.008	28.23	28.3097	28.6892	28.018	28.2835	27.985	29.13	29.1036	27.0972	29.1237	28.4493	27.652	28.4076	29.2048	29.4578	29.179	28.771	28.8123	Actin-related protein 5	Arp5	231		DNA duplex unwinding [GO:0032508];DNA recombination [GO:0006310];DNA repair [GO:0006281];regulation of transcription, DNA-templated [GO:0006355];transcription, DNA-templated [GO:0006351]";"chromatin remodeling [GO:0006338]	nucleus [GO:0005634]";"Ino80 complex [GO:0031011]		16	16	29.6	75.121	0	198.08	4598400000	118	0.549517	0.388342	0.191501	-0.140518	0.108453	0.102645	0.42	-0.494786	2.16915	-0.825233	0.191501	-0.140518	0.296184	-0.243163
27.8455	27.486	27.1378	27.8001	27.8003	26.8364	27.6738	27.9062	27.6151	28.3842	28.2052	27.4294	27.2496	27.3368	27.3984	27.9224	29.0239	28.4699	27.6643	28.4679	27.626		Jupiter	232					7	1	70.5	11.222	0	76.454	3665900000	45	1.13724	0.153075	0.699551	-0.435061	0.587338	0.552649	0.310894	-0.252155	0.259042	-0.187705	0.699551	-0.435061	1.72562	-0.98771
NaN	23.2533	NaN	23.8915	24.872	NaN	23.4803	26.0693	NaN	NaN	24.8701	25.116	25.6684	24.9103	24.7335	24.7756	25.4536	25.1199	NaN	24.277	NaN		Tab2	233		peptidoglycan recognition protein signaling pathway [GO:0061057];positive regulation of biosynthetic process of antibacterial peptides active against Gram-negative bacteria [GO:0006964];positive regulation of defense response to virus by host [GO:0002230];positive regulation of protein import into nucleus, translocation [GO:0033160]";"male courtship behavior, veined wing generated song production…		metal ion binding [GO:0046872]	8	8	13.3	90.251	0.00017476	3.8927	239760000	14	0.512766	0.396679	0	-0.27142	0	0.839308	0	0.782627	0	0.497758	0	-0.27142	1.02279	-1.11073
32.1829	32.1273	31.9845	31.7413	32.3103	31.9874	32.014	31.8515	31.7173	32.4464	32.629	32.626	31.9756	32.2685	32.2405	32.4036	32.4237	32.5358	31.7855	32.0892	32.4696		hrg	234		mRNA polyadenylation [GO:0006378]	nucleus [GO:0005634]	metal ion binding [GO:0046872];polynucleotide adenylyltransferase activity [GO:0004652];RNA binding [GO:0003723]";"ATP binding [GO:0005524]	31	31	50.7	74.529	0	323.31	57956000000	532	1.77819	0.0815259	0.127608	-0.0591857	0.774051	0.339572	0.60082	0.249514	0.516494	-0.253853	0.127608	-0.0591857	1.87972	-0.398757
27.4821	27.5643	27.196	26.8018	27.0268	26.7372	27.198	27.2584	27.2091	28.6269	28.4025	28.385	27.909	27.0407	27.0865	28.338	28.3624	29.045	28.5183	28.297	27.4366		l(3)neo38-RA;l(3)neo38	235	+	regulation of transcription by RNA polymerase II [GO:0006357]";"regulation of chromatin silencing [GO:0031935];regulation of chromatin silencing [GO:0031935]	nucleus [GO:0005634]";"heterochromatin [GO:0000792];heterochromatin [GO:0000792]	nucleic acid binding [GO:0003676]";"DNA-binding transcription factor activity, RNA polymerase II-specific [GO:0000981];nucleic acid binding [GO:0003676]	6	6	19.1	45.532	0	65.245	3041700000	49	2.30879	0.0232847	1.81377	-0.949267	0.545912	0.497807	0.143371	-0.175533	1.2256	-0.862155	1.81377	-0.949267	3.12051	-1.44707
25.6985	27.3247	26.7004	26.8197	27.5869	25.4504	26.1728	26.6765	26.1407	26.9439	27.0718	26.636	25.9843	25.3629	25.1011	26.2571	27.4398	24.7879	25.7073	26.279	26.6388			236				calcium ion binding [GO:0005509]	12	12	34.7	54.96	0	15.195	966800000	43	0.0408877	0.929369	0.302942	0.388448	0.0191197	-0.0467523	0.0161232	-0.0249863	0.139855	0.121684	0.302942	0.388448	0.24897	0.4352
29.7846	30.1594	30.3079	29.4114	30.0135	30.2057	29.4955	30.3171	30.402	30.0994	30.2936	30.083	29.8408	29.7103	29.7937	30.3044	30.1747	30.615	30.0324	29.765	29.793		apt	237		border follicle cell migration [GO:0007298];central nervous system development [GO:0007417];epithelial cell migration, open tracheal system [GO:0007427];heart development [GO:0007507];negative regulation of JAK-STAT cascade [GO:0046426];negative regulation of oskar mRNA translation [GO:0007319];neuromuscular synaptic transmission [GO:0007274];open tracheal system development [GO:0007424];positive…	nucleus [GO:0005634]";"cytoplasm [GO:0005737]	DNA-binding transcription factor activity [GO:0003700];enhancer sequence-specific DNA binding [GO:0001158];mRNA 3'-UTR binding [GO:0003730];mRNA binding [GO:0003729];RNA polymerase II regulatory region sequence-specific DNA binding [GO:0000977];sequence-specific DNA binding [GO:0043565]";"DNA-binding transcription activator activity, RNA polymerase II-specific [GO:0001228];"DNA-binding transcript…	19	19	33.1	54.547	0	72.286	11751000000	217	0.492008	0.489596	0.230124	0.116955	1.49039	0.501269	0.314537	0.106658	0.277582	0.208083	0.230124	0.116955	0.924413	-0.384314
28.1897	28.1942	27.4751	27.9267	26.967	25.5801	26.8756	28.6405	24.9815	27.9685	28.015	26.7199	28.6129	25.516	26.7812	27.8331	27.593	27.6826	27.1192	27.4341	26.1464	Putative transcription factor capicua	cic	238		dorsal appendage formation [GO:0046843];epidermal growth factor receptor signaling pathway [GO:0007173];eye morphogenesis [GO:0048592];imaginal disc-derived wing vein specification [GO:0007474];maternal specification of dorsal/ventral axis, oocyte, soma encoded [GO:0007313];negative regulation of cell growth [GO:0030308];negative regulation of transcription by RNA polymerase II [GO:0000122];regul…	nucleus [GO:0005634]";"cytosol [GO:0005829];nucleus [GO:0005634]	repressing transcription factor binding [GO:0070491];RNA polymerase II regulatory region sequence-specific DNA binding [GO:0000977];sequence-specific DNA binding [GO:0043565]";"DNA-binding transcription repressor activity, RNA polymerase II-specific [GO:0001227];DNA binding [GO:0003677]	12	12	7.2	231.57	0	33.629	1916500000	57	0.0719595	0.874421	0.321207	0.48887	0.954344	0.802988	0.20302	0.369002	0.0199359	-0.0673701	0.321207	0.48887	0.20927	-0.314118
31.3777	31.0329	31.2622	31.4866	31.0956	31.4287	31.2725	30.6298	30.9754	31.3011	31.2765	31.329	30.9009	30.9959	31.1306	31.172	30.7158	31.2757	31.4772	31.2341	31.6299	Signal transducer and activator of transcription;Signal transducer and transcription activator	Stat92E	239		border follicle cell migration [GO:0007298];cell dedifferentiation [GO:0043697];cellular response to lipopolysaccharide [GO:0071222];cellular response to X-ray [GO:0071481];compound eye development [GO:0048749];defense response [GO:0006952];eye-antennal disc morphogenesis [GO:0007455];germ-line stem cell division [GO:0042078];germ-line stem cell population maintenance [GO:0030718];hemocyte prolif…	cytoplasmic side of apical plasma membrane [GO:0098592];cytosol [GO:0005829];nucleoplasm [GO:0005654];nucleus [GO:0005634]";"cytoplasm [GO:0005737]	DNA binding [GO:0003677];DNA-binding transcription factor activity [GO:0003700]";histone binding [GO:0042393];proximal promoter DNA-binding transcription activator activity, RNA polymerase II-specific [GO:0001077]";"cytokine receptor binding [GO:0005126];"DNA binding [GO:0003677]	33	2	50.2	86.414	0	323.31	29351000000	431	1.0194	0.247185	0.597999	-0.166492	0.883478	-0.392597	1.22274	-0.291442	1.04875	-0.487851	0.597999	-0.166492	0.711782	0.226106
30.8431	30.8971	30.5915	30.1198	30.3885	30.251	30.2169	30.7065	30.1904	30.3394	30.769	30.0833	30.3667	29.9721	30.5675	30.4469	30.3267	29.5572	30.4547	30.1123	30.2518		bon	240		chromatin organization [GO:0006325];protein ubiquitination [GO:0016567]";"axon guidance [GO:0007411]	nucleus [GO:0005634]	ubiquitin-protein transferase activity [GO:0004842];zinc ion binding [GO:0008270]";"chromatin binding [GO:0003682]	40	40	34.4	120.37	0	323.31	14644000000	318	0.297868	0.642888	0.576041	0.242201	0.213512	-0.162725	0.157436	0.0767012	0.193272	0.098285	0.576041	0.242201	0.776352	0.404927
30.2573	30.2573	30.1262	29.7446	29.4678	29.9969	28.8514	27.5856	26.9301	30.3464	30.1107	30.0672	30.6066	30.0146	30.4235	29.8893	29.3874	29.3393	29.814	29.8199	29.6475		beta-Man	241	+	mannan catabolic process [GO:0046355]";"glycoprotein catabolic process [GO:0006516]	lysosome [GO:0005764]	beta-mannosidase activity [GO:0004567]	33	33	45.1	103.24	0	323.31	12086000000	293	5.1262	0.000564103	0.524371	0.214568	0.528582	-0.221778	1.97843	0.501041	1.59553	-1.97142	0.524371	0.214568	1.05587	0.436345
34.1574	33.8291	34.3201	33.9028	33.6095	33.9381	33.5527	33.506	33.9931	33.8679	33.9728	33.9985	33.806	34.1246	33.7349	34.1628	33.9654	34.243	34.0551	33.6177	34.0906		CtBP	242				hydroxypyruvate reductase activity [GO:0016618];NAD binding [GO:0051287]";"glyoxylate reductase (NADP) activity [GO:0030267]	32	0	73.1	41.877	0	323.31	189980000000	1010	0.666802	0.418635	0.077319	0.0383492	0.513523	0.202579	0.00953912	-0.00369072	0.473329	-0.237194	0.077319	0.0383492	0.474267	-0.16423
32.6134	32.7055	32.6411	32.317	32.4115	32.4287	32.2997	32.517	32.3386	32.2474	32.3502	32.371	32.2106	32.102	32.0683	32.4533	32.2768	32.4223	32.2529	32.5134	32.3498		Dys	243				zinc ion binding [GO:0008270]";"actin binding [GO:0003779]	152	2	50.9	359.85	0	323.31	60047000000	1415	1.6249	0.158808	0.694356	0.147513	0.0442251	0.0121104	0.841312	-0.147116	0.0441041	0.0130844	0.694356	0.147513	0.671246	0.135403
28.5152	29.0258	29.3373	28.5004	28.5583	27.9132	28.7539	28.7055	28.8076	29.0865	28.9122	28.6607	28.9226	29.0173	28.9649	28.877	29.5396	28.9844	28.5874	28.5668	28.9999	Negative elongation factor A	Nelf-A	244		negative regulation of transcription by RNA polymerase II [GO:0000122];negative regulation of transcription elongation from RNA polymerase II promoter [GO:0034244]";"multicellular organism development [GO:0007275];negative regulation of transcription elongation from RNA polymerase II promoter [GO:0034244]	NELF complex [GO:0032021];nucleus [GO:0005634];transcriptional repressor complex [GO:0017053]";"chromosome [GO:0005694];NELF complex [GO:0032021]	RNA binding [GO:0003723];translation elongation factor activity [GO:0003746]	23	23	23.3	134.82	0	268.85	5371700000	141	0.563749	0.428921	0.0908884	-0.0763105	0.768271	0.415668	0.844588	0.209355	0.0931859	0.0376275	0.0908884	-0.0763105	0.766509	-0.491979
31.5781	31.1246	31.1569	30.5873	30.9908	30.5143	31.2318	31.1957	31.1699	30.648	30.7314	30.7074	30.6486	30.7782	30.982	31.2842	31.4605	31.484	30.6155	30.5756	30.6448	MOB kinase activator-like 1	mats	247	+	cell proliferation [GO:0008283];chromosome segregation [GO:0007059];hippo signaling [GO:0035329];multicellular organism development [GO:0007275];ovarian follicle cell development [GO:0030707];signal transduction [GO:0007165]";"apoptotic process [GO:0006915]	cytosol [GO:0005829];nucleus [GO:0005634];plasma membrane [GO:0005886]";"centrosome [GO:0005813]	protein kinase activator activity [GO:0030295];protein kinase binding [GO:0019901]";"metal ion binding [GO:0046872]	11	11	42.9	25.229	0	158.79	25411000000	310	2.54195	0.0265711	0.817999	0.38002	3.56585	0.797585	0.950848	0.137274	4.58403	0.587156	0.817999	0.38002	0.903082	-0.417565
27.1036	27.1561	26.8385	NaN	27.0349	26.7679	27.9957	26.185	28.0922	NaN	27.5162	NaN	28.0278	27.0571	27.4937	26.1994	28.3379	28.4943	27.3824	26.8785	27.0195	Protein Malvolio	Mvl	248		copper ion import [GO:0015677];divalent metal ion transport [GO:0070838];iron assimilation [GO:0033212];multicellular organismal iron ion homeostasis [GO:0060586];positive regulation of iron ion transmembrane transport [GO:0034761];sensory perception of sweet taste [GO:0050916];transition metal ion homeostasis [GO:0055076];transition metal ion transport [GO:0000041];viral entry into host cell [GO…	integral component of plasma membrane [GO:0005887];membrane [GO:0016020];plasma membrane [GO:0005886]";"endosome [GO:0005768];integral component of membrane [GO:0016021]	copper ion transmembrane transporter activity [GO:0005375];iron ion transmembrane transporter activity [GO:0005381];manganese ion transmembrane transporter activity [GO:0005384];symporter activity [GO:0015293]";"cadmium ion transmembrane transporter activity [GO:0015086];metal ion transmembrane transporter activity [GO:0046873]	5	5	10.7	65.466	0	34.606	1639800000	32	0.206488	0.689326	0.322741	-0.113284	0.316303	0.583792	0.777066	0.430276	0.199605	0.330832	0.322741	-0.113284	0.598722	-0.697076
24.5837	NaN	26.5677	25.4714	25.9809	25.6939	26.3428	25.5097	25.7848	26.2705	NaN	25.649	24.7475	24.9387	25.4491	25.689	NaN	NaN	25.376	NaN	26.7321			249					9	2	5.4	219.68	0.00018132	6.3534	531390000	11	0.191507	0.713139	0.242727	-0.394515	0	-0.364981	0.50045	-0.643066	0.103295	-0.174958	0.242727	-0.394515	0	-0.0295341
NaN	NaN	NaN	24.657	24.7786	NaN	23.2158	24.5141	NaN	NaN	NaN	NaN	NaN	NaN	26.3125	NaN	NaN	NaN	24.6101	25.2496	NaN	Forkhead box protein O	foxo	250		cellular response to amino acid starvation [GO:0034198];cellular response to oxidative stress [GO:0034599];cellular response to starvation [GO:0009267];circadian rhythm [GO:0007623];compound eye morphogenesis [GO:0001745];dendrite morphogenesis [GO:0048813];determination of adult lifespan [GO:0008340];ecdysone biosynthetic process [GO:0006697];entry into reproductive diapause [GO:0055116];female …	cytosol [GO:0005829];nucleus [GO:0005634]";"cytoplasm [GO:0005737];nucleus [GO:0005634]	DNA-binding transcription factor activity [GO:0003700];DNA-binding transcription factor activity, RNA polymerase II-specific [GO:0000981];proximal promoter DNA-binding transcription activator activity, RNA polymerase II-specific [GO:0001077];RNA polymerase II regulatory region sequence-specific DNA binding [GO:0000977];sequence-specific DNA binding [GO:0043565];sequence-specific DNA binding [GO:0…	2	2	5.5	68.149	0.0041535	1.8303	196980000	3	NaN	NaN	0.235414	-0.212071	0	NaN	0	1.38264	0.554421	-1.0649	0.235414	-0.212071	0	NaN
35.2058	35.0396	35.3541	35.6467	35.3982	35.679	35.3587	35.4016	35.3217	35.4318	35.3423	35.2926	35.3845	35.4041	35.6316	35.2747	35.0027	35.2565	35.624	35.5302	35.5685	Eukaryotic translation initiation factor 2 subunit 3	eIF-2gamma	252		formation of translation preinitiation complex [GO:0001731]	cytosol [GO:0005829];eukaryotic 43S preinitiation complex [GO:0016282];eukaryotic translation initiation factor 2 complex [GO:0005850];multi-eIF complex [GO:0043614]";"cytoplasm [GO:0005737]	GTP binding [GO:0005525];translation initiation factor activity [GO:0003743]";"GTPase activity [GO:0003924]	48	38	75.8	51.484	0	323.31	492440000000	1595	0.966302	0.315427	0.601242	-0.186991	1.90232	-0.396277	1.2039	-0.159754	2.40557	-0.213563	0.601242	-0.186991	0.639504	0.209286
33.0887	32.3775	32.7557	33.4272	32.6954	33.325	33.1465	32.7901	33.3016	32.232	31.4951	32.1752	32.6726	32.6523	32.7653	33.4999	32.8966	33.1838	33.1425	32.5617	33.0188		RanBP3	253		nuclear export [GO:0051168];positive regulation of GTPase activity [GO:0043547];protein export from nucleus [GO:0006611]";"negative regulation of canonical Wnt signaling pathway [GO:0090090]	cytoplasm [GO:0005737];nuclear pore [GO:0005643];nucleus [GO:0005634]";"centrosome [GO:0005813]	Ran GTPase binding [GO:0008536]	19	19	56.9	47.373	0	323.31	97985000000	511	1.51386	0.0879873	0.048974	0.037241	0.50367	0.285741	0.98339	-0.575593	0.299849	0.17172	0.048974	0.037241	0.41637	-0.2485
NaN	NaN	NaN	NaN	NaN	23.6262	NaN	NaN	NaN	24.0149	NaN	NaN	NaN	NaN	NaN	NaN	NaN	NaN	NaN	NaN	NaN	40S ribosomal protein S19b	RpS19b	254		ribosomal small subunit assembly [GO:0000028]";"cytoplasmic translation [GO:0002181];translation [GO:0006412]	cytosolic small ribosomal subunit [GO:0022627];ribosome [GO:0005840]	structural constituent of ribosome [GO:0003735]	2	1	12.9	17.362	0.0049685	1.7113	24528000	1	NaN	NaN	0	NaN	-4.34294e-08	0	0	NaN	-4.34294e-08	0	0	NaN	0	NaN
28.4653	27.4149	28.4541	28.433	28.2744	28.0455	28.4387	28.6813	28.4017	29.1472	29.0924	29.3164	28.5398	28.946	28.8013	28.8827	29.1065	29.3454	29.2638	28.982	28.1223	Non-specific serine/threonine protein kinase	Pak3	255	+	activation of protein kinase activity [GO:0032147];myoblast fusion [GO:0007520];positive regulation of synapse assembly [GO:0051965];protein autophosphorylation [GO:0046777];protein phosphorylation [GO:0006468];protein phosphorylation [GO:0006468]";regulation of axonogenesis [GO:0050770];regulation of MAPK cascade [GO:0043408];signal transduction by protein phosphorylation [GO:0023014];stress-act…	ruffle [GO:0001726]";"cytoplasm [GO:0005737]	protein homodimerization activity [GO:0042803];protein serine/threonine kinase activity [GO:0004674];Rac GTPase binding [GO:0048365]";"ATP binding [GO:0005524]	24	24	46.2	64.146	0	209.3	5048800000	139	2.1507	0.0348737	0.961162	-0.608168	0.36536	0.322182	0.276329	0.184452	0.327481	-0.282135	0.961162	-0.608168	2.05293	-0.93035
NaN	26.7187	NaN	26.4744	25.9402	25.1396	26.1462	25.7509	25.8518	26.316	26.8434	24.4007	25.2824	26.2655	25.0557	26.0248	25.5933	27.3264	25.2559	25.7353	25.7283		lute;CG5319-RA	256		neurogenesis [GO:0022008]	cytosol [GO:0005829]		8	8	14.8	71.999	0	55.276	724390000	35	0.154618	0.757124	0.514064	0.495034	0.611105	0.741648	0.077685	0.120775	0.800688	0.343131	0.514064	0.495034	0.155838	-0.246614
35.7426	35.3114	35.6119	35.8634	35.6345	35.9082	35.9469	35.7762	35.817	35.7784	35.3926	35.6544	35.301	35.624	35.7244	35.7873	35.8406	35.9134	35.9716	35.4626	35.6816	ATP-dependent RNA helicase bel	bel	257		instar larval development [GO:0002168];male germ-line stem cell population maintenance [GO:0036098];mitotic sister chromatid segregation [GO:0000070];oogenesis [GO:0048477];regulation of gene expression [GO:0010468];RNA interference [GO:0016246];spermatogenesis [GO:0007283]";"ecdysone-mediated induction of salivary gland cell autophagic cell death [GO:0035072]	cytosol [GO:0005829];neuronal cell body [GO:0043025];P granule [GO:0043186];RISC complex [GO:0016442]";"cytoplasm [GO:0005737]	ATP binding [GO:0005524];ATP-dependent RNA helicase activity [GO:0004004];nucleic acid binding [GO:0003676]";RNA binding [GO:0003723]";"ATP binding [GO:0005524];"ATPase activity [GO:0016887]	62	60	66.7	85.413	0	323.31	708200000000	3458	0.628412	0.46385	0.0587891	-0.0265986	0.394561	0.141846	0.371275	-0.126139	0.38071	0.141441	0.0587891	-0.0265986	0.620874	-0.168444
29.3984	29.1973	29.3283	29.9283	29.208	29.9098	29.5101	29.5069	30.3256	29.7032	28.6838	29.5572	29.6535	30.4208	29.7536	29.9408	29.6306	30.1428	30.2104	28.8904	29.8133	Putative OPA3-like protein CG13603	CG13601	258		regulation of lipid metabolic process [GO:0019216]	mitochondrion [GO:0005739]		13	13	55.2	31.118	0	222.49	11835000000	197	0.107318	0.843199	0.171402	-0.142983	0.253026	0.266755	0.00749991	-0.0093298	0.108337	0.142881	0.171402	-0.142983	0.95942	-0.409738
28.0922	29.2307	28.2289	28.6324	28.6579	28.5362	28.6319	28.6259	28.1477	29.0713	28.894	28.5439	28.5345	28.5964	28.0896	28.2165	29.3904	28.5053	28.8417	28.8999	27.5572	Conserved oligomeric Golgi complex subunit 1	CG4848	260		intra-Golgi vesicle-mediated transport [GO:0006891];protein transport [GO:0015031]";"Golgi organization [GO:0007030];intra-Golgi vesicle-mediated transport [GO:0006891]	Golgi membrane [GO:0000139];Golgi transport complex [GO:0017119]";"Golgi apparatus [GO:0005794];Golgi transport complex [GO:0017119]		27	27	35.1	96.539	0	228.98	4580900000	141	0.0253219	0.961725	0.132312	0.130097	0.183646	0.271107	0.216338	0.188673	0.0255424	0.0355797	0.132312	0.130097	0.165154	-0.141011
32.7696	32.5232	32.8856	32.735	32.761	32.8767	32.6962	32.4879	32.7829	32.5138	32.5612	32.5456	32.703	32.8499	32.7038	32.481	32.649	33.0193	32.6962	32.5427	32.5965	Myosin heavy chain 95F	jar-RG;jar	261		actin filament organization [GO:0007015];actin filament-based movement [GO:0030048];asymmetric neuroblast division [GO:0055059];asymmetric protein localization involved in cell fate determination [GO:0045167];basal protein localization [GO:0045175];border follicle cell migration [GO:0007298];cell-cell junction maintenance [GO:0045217];cytoskeleton-dependent cytoplasmic transport, nurse cell to oo…	cell cortex [GO:0005938];cytoplasm [GO:0005737];cytosol [GO:0005829];endocytic vesicle [GO:0030139];germline ring canal [GO:0045172];growth cone [GO:0030426];investment cone [GO:0070865];microtubule associated complex [GO:0005875];myosin complex [GO:0016459];myosin VI complex [GO:0031476];protein-containing complex [GO:0032991];sperm individualization complex [GO:0070864];unconventional myosin co…	actin filament binding [GO:0051015];ATP binding [GO:0005524];ATPase activity [GO:0016887];ATPase activity, coupled [GO:0042623];calmodulin binding [GO:0005516];microfilament motor activity [GO:0000146];microtubule binding [GO:0008017];motor activity [GO:0003774];motor activity [GO:0003774]";myosin light chain binding [GO:0032027];myosin VI light chain binding [GO:0070856]";"actin binding [GO:0003…	82	82	61.2	143.3	0	323.31	77376000000	1283	0.204214	0.816494	0.908631	0.146713	0.251062	0.104649	0.161846	0.0343901	0.168338	0.0438944	0.908631	0.146713	0.121281	0.0420647
29.2162	29.527	28.5095	29.3116	29.1416	28.9363	29.0631	30.3277	29.1793	29.0888	29.0251	29.1826	28.5479	26.9728	29.3916	27.807	28.3339	28.1778	29.3811	29.096	28.1225		gwl	262		female meiosis I [GO:0007144];female meiotic nuclear division [GO:0007143];intracellular signal transduction [GO:0035556];mitotic cell cycle [GO:0000278];negative regulation of phosphoprotein phosphatase activity [GO:0032515];peptidyl-serine phosphorylation [GO:0018105];protein phosphorylation [GO:0006468];regulation of meiotic nuclear division [GO:0040020];regulation of mitotic cell cycle [GO:00…	nuclear envelope [GO:0005635];nucleus [GO:0005634]";"cytoplasm [GO:0005737]	ATP binding [GO:0005524];protein kinase activity [GO:0004672];protein serine/threonine kinase activity [GO:0004674]";"14-3-3 protein binding [GO:0071889]	21	20	30.9	88.715	0	57.64	6382400000	106	0.914457	0.201365	0.314489	0.240515	0.858278	-0.760299	0.103931	-0.165045	0.519782	0.656858	0.314489	0.240515	2.43923	1.00081
26.7011	29.0843	27.8597	28.9675	29.9234	27.7802	28.0585	28.6881	27.2891	28.5375	28.6587	27.1991	28.6964	27.6228	28.3356	26.8748	28.822	29.481	28.3864	28.3746	27.3199			263					32	32	31.2	123	0	100.59	3678700000	113	0.0166228	0.970891	0.195833	0.359026	0.159807	0.365606	0.128067	0.148014	0.00925396	-0.0151043	0.195833	0.359026	0.0025674	-0.00658035
NaN	NaN	NaN	NaN	NaN	NaN	24.629	NaN	NaN	24.1922	24.1115	24.2357	24.9858	24.1587	NaN	NaN	NaN	NaN	NaN	24.7128	NaN	Protein nanos	nos	264		dendrite morphogenesis [GO:0048813];female meiosis chromosome segregation [GO:0016321];germ cell development [GO:0007281];germ cell migration [GO:0008354];germ-line stem cell division [GO:0042078];germ-line stem cell population maintenance [GO:0030718];mRNA polyadenylation [GO:0006378];negative regulation of apoptotic process [GO:0043066];negative regulation of synaptic growth at neuromuscular ju…	pole plasm [GO:0045495];postsynapse of neuromuscular junction [GO:0098975]";"neuromuscular junction [GO:0031594]	zinc ion binding [GO:0008270]";"RNA binding [GO:0003723]	3	3	12.6	41.491	0	8.873	102670000	6	0	1	0	NaN	0	NaN	0	-0.376055	0	-0.0838699	0	NaN	-4.34294e-08	0
27.7236	27.7407	27.356	28.4457	28.1847	28.1946	29.1739	28.2294	28.9585	28.4352	28.1588	28.7133	28.6179	28.8294	28.9717	28.841	28.1359	27.9308	29.2382	27.9323	28.7939		MBD-like	265		methylation-dependent chromatin silencing [GO:0006346];multicellular organism development [GO:0007275];negative regulation of transcription by RNA polymerase II [GO:0000122]";negative regulation of transcription, DNA-templated [GO:0045892];negative regulation of transcription, DNA-templated [GO:0045892]";"chromosome condensation [GO:0030261]	NuRD complex [GO:0016581];polytene chromosome [GO:0005700]";"nucleus [GO:0005634]	methyl-CpG binding [GO:0008327];protein homodimerization activity [GO:0042803];transcription corepressor activity [GO:0003714]";"histone deacetylase binding [GO:0042826]	13	13	50.4	36.274	0	157.69	4583500000	81	1.26114	0.1256	1.10266	-0.713925	0.303549	-0.352231	0.038549	-0.0337547	0.0993774	0.132469	1.10266	-0.713925	0.57222	-0.361694
27.122	27.5348	27.1251	25.6139	NaN	26.5953	25.7783	26.0609	25.5229	26.8164	26.8102	27.5138	26.0382	26.1814	25.7403	27.2997	26.4974	27.2174	28.0093	26.9124	27.2895	Tetraspanin	Tsp96F	266		cell surface receptor signaling pathway [GO:0007166]	integral component of plasma membrane [GO:0005887];plasma membrane [GO:0005886]";"integral component of membrane [GO:0016021]		4	4	22.8	29.849	0	53.5	1281800000	35	1.31603	0.102047	0.565516	-0.605495	0.4132	-0.398876	1.07168	-0.887027	1.97349	-1.61638	0.565516	-0.605495	0.166441	-0.20662
29.1417	27.3328	27.4243	28.3184	28.2275	26.2265	27.3717	27.8215	26.1615	29.4931	28.4253	27.154	28.299	27.3517	26.9114	NaN	26.3297	24.1098	27.7682	26.9162	24.9653		Lrrk	267		axo-dendritic transport [GO:0008088];cellular response to starvation [GO:0009267];establishment of Golgi localization [GO:0051683];intracellular distribution of mitochondria [GO:0048312];locomotion [GO:0040011];lysosome localization [GO:0032418];negative regulation of dendrite morphogenesis [GO:0050774];negative regulation of neuron death [GO:1901215];neuromuscular junction development [GO:000752…	cytoplasm [GO:0005737];cytosol [GO:0005829];dendritic branch point [GO:1990033];dendritic shaft [GO:0043198];Golgi stack [GO:0005795];late endosome membrane [GO:0031902];lysosomal membrane [GO:0005765];lysosomal membrane [GO:0005765]";neuromuscular junction [GO:0031594];plasmodesma [GO:0009506];subsynaptic reticulum [GO:0071212];terminal bouton [GO:0043195]";type I terminal bouton [GO:0061174]";"…	protein kinase activity [GO:0004672];protein serine/threonine kinase activity [GO:0004674];Rab GTPase binding [GO:0017137]";"ATP binding [GO:0005524]	39	39	20.3	268.96	0	56.443	2227300000	100	1.2692	0.096693	0.760308	1.22867	0.399938	-1.3301	0.901444	1.38922	0.230577	0.568347	0.760308	1.22867	1.50294	2.55877
34.0916	34.3582	33.9761	34.5088	34.1444	33.9353	34.119	34.1412	34.1266	33.7908	33.6199	33.6809	34.457	34.6371	34.1232	34.4863	34.4671	33.9295	34.193	34.845	34.5334	Histone H2A;Histone H2A.v	His2Av	268		DNA repair [GO:0006281];male germ-line stem cell population maintenance [GO:0036098];multicellular organism development [GO:0007275];protein localization to chromatin [GO:0071168];somatic stem cell population maintenance [GO:0035019]";"chromatin organization [GO:0006325]	nuclear chromatin [GO:0000790];nucleosome [GO:0000786];nucleus [GO:0005634];nucleus [GO:0005634]";polytene chromosome [GO:0005700];polytene chromosome chromocenter [GO:0005701];site of double-strand break [GO:0035861]";"chromosome [GO:0005694];"nucleosome [GO:0000786]	protein heterodimerization activity [GO:0046982]";protein-containing complex binding [GO:0044877];"DNA binding [GO:0003677]	7	5	66.7	14.981	0	296.79	233950000000	678	0.487741	0.487934	1.03659	-0.354726	0.36567	-0.229485	0.858882	-0.472304	0.982441	-0.394871	1.03659	-0.354726	0.29488	-0.125241
28.6665	28.4077	27.5009	28.0498	28.0827	25.7215	28.1832	28.8274	27.0501	29.0828	30.8173	28.3769	29.4363	26.6634	28.0768	28.5261	28.3474	28.4301	27.7627	27.1465	27.9711	TATA box-binding protein-associated factor RNA polymerase I subunit B	TAF1B;CG6241	269		positive regulation of transcription of nucleolar large rRNA by RNA polymerase I [GO:1901838];RNA polymerase I preinitiation complex assembly [GO:0001188]";"nucleolar large rRNA transcription by RNA polymerase I [GO:0042790]	RNA polymerase I core factor complex [GO:0070860];RNA polymerase I core factor complex [GO:0070860]";RNA polymerase transcription factor SL1 complex [GO:0005668]";"integral component of membrane [GO:0016021];"nucleolus [GO:0005730];RNA polymerase I core factor complex [GO:0070860]	RNA polymerase I CORE element sequence-specific DNA binding [GO:0001164]";"metal ion binding [GO:0046872];RNA polymerase I CORE element sequence-specific DNA binding [GO:0001164]	19	19	24.3	101.77	0	64.674	3719700000	75	0.346375	0.525355	0.060545	0.111403	1.48018	0.807709	0.634651	1.11547	0.274315	0.393447	0.060545	0.111403	0.508754	-0.696306
26.1448	25.4822	26.2472	24.1814	NaN	NaN	25.4808	24.937	NaN	25.5822	25.338	25.058	24.8592	NaN	25.9132	NaN	24.6786	NaN	NaN	NaN	NaN		Synd	270		cytoskeleton organization [GO:0007010];male meiosis cytokinesis [GO:0007112];membrane organization [GO:0061024];mitotic cytokinesis [GO:0000281];neurotransmitter secretion [GO:0007269];plasma membrane tubulation [GO:0097320];positive regulation of synaptic growth at neuromuscular junction [GO:0045887];spindle assembly involved in male meiosis [GO:0007053];synaptic vesicle endocytosis [GO:0048488]…	cytoplasm [GO:0005737];cytoskeleton [GO:0005856];midbody [GO:0030496];plasma membrane [GO:0005886];postsynaptic membrane [GO:0045211];subsynaptic reticulum [GO:0071212]";"cleavage furrow [GO:0032154]	lipid binding [GO:0008289];phospholipid binding [GO:0005543]";"cytoskeletal protein binding [GO:0008092]	33	2	59.4	56.038	0	8.4013	330470000	4	0.0644916	0.894082	0	NaN	0	NaN	0	NaN	0	NaN	0	NaN	0	0.835276
33.4786	32.6359	32.9728	33.1523	32.7388	32.735	32.5422	32.3077	32.6901	32.3578	31.9642	32.5751	31.9259	32.5741	32.7015	32.7291	32.0194	32.4579	33.5521	32.6237	33.1575	Annexin;Annexin B9	AnxB9	271		maintenance of cell polarity [GO:0030011];regulation of multivesicular body size involved in endosome transport [GO:0010797];wing disc dorsal/ventral pattern formation [GO:0048190]";"endosome transport via multivesicular body sorting pathway [GO:0032509]	endomembrane system [GO:0012505]";"cell cortex [GO:0005938]	calcium ion binding [GO:0005509];calcium ion binding [GO:0005509]";calcium-dependent phospholipid binding [GO:0005544];spectrin binding [GO:0030507]";"actin binding [GO:0003779];"calcium-dependent phospholipid binding [GO:0005544]	26	26	59.9	35.944	0	323.31	78450000000	511	1.82362	0.0595288	0.251805	-0.158908	0.979258	-0.70897	1.61792	-0.761335	0.961457	-0.597781	0.251805	-0.158908	1.29184	0.550062
32.9951	33.0429	32.9941	32.9114	32.9314	32.7681	32.3979	32.5654	32.4614	32.8812	32.9235	32.8449	32.9133	32.6159	32.6167	32.8481	32.7199	32.6491	32.7664	32.7368	32.7765		Bruce	272	+	cellular response to starvation [GO:0009267];negative regulation of apoptotic process [GO:0043066];negative regulation of macroautophagy [GO:0016242];negative regulation of nurse cell apoptotic process [GO:0045849];oogenesis [GO:0048477];programmed cell death [GO:0012501];protein polyubiquitination [GO:0000209];regulation of cytokinesis [GO:0032465];spermatid development [GO:0007286];ubiquitin-de…		ubiquitin conjugating enzyme activity [GO:0061631]	161	2	39.4	536.53	0	323.31	81063000000	1476	3.39893	0.0227055	1.75453	0.180596	0.128991	-0.0208931	0.178282	0.0393562	2.32161	-0.284982	1.75453	0.180596	1.64128	0.201489
29.7826	29.2533	29.4747	29.5585	29.7973	29.8163	29.9858	30.55	30.3107	29.6932	29.5179	29.4705	30.0638	29.5783	29.5903	29.7132	30.6139	30.0833	30.0961	29.4531	29.1546	Peripheral plasma membrane protein CASK	CASK	273		adult walking behavior [GO:0007628];anesthesia-resistant memory [GO:0007615];behavioral response to ethanol [GO:0048149];border follicle cell migration [GO:0007298];establishment or maintenance of cell polarity [GO:0007163];locomotion [GO:0040011];long-term memory [GO:0007616];male courtship behavior [GO:0008049];medium-term memory [GO:0072375];neuromuscular synaptic transmission [GO:0007274];neu…	plasma membrane [GO:0005886];type I terminal bouton [GO:0061174]";"neuromuscular junction [GO:0031594]	calmodulin binding [GO:0005516];calmodulin-dependent protein kinase activity [GO:0004683];neurexin family protein binding [GO:0042043]";protein kinase activity [GO:0004672]";"ATP binding [GO:0005524]	36	36	44.6	104.29	0	175.85	9286700000	248	1.7248	0.0722001	0.0729635	0.0458584	0.677599	0.56893	0.145136	0.0844129	1.04079	0.714265	0.0729635	0.0458584	1.32306	-0.523071
31.2125	31.1861	31.3441	31.0305	31.0887	31.2402	30.8286	30.7768	30.7077	31.6379	31.2943	31.7077	31.2272	31.8227	31.4574	31.317	31.6019	30.8694	31.6829	31.4443	31.522	Methionine--tRNA ligase, mitochondrial	Aats-met	274	+	methionyl-tRNA aminoacylation [GO:0006431]	mitochondrion [GO:0005739]";"mitochondrial matrix [GO:0005759];cytoplasm [GO:0005737]	methionine-tRNA ligase activity [GO:0004825]";"ATP binding [GO:0005524]	25	25	50.2	65.998	0	323.31	31471000000	399	3.18552	0.0126879	2.56255	-0.366023	0.568211	-0.28696	0.0602571	-0.0252069	3.2364	-0.7787	2.56255	-0.366023	0.204136	-0.0790631
26.2906	25.8955	25.7416	25.913	26.7303	26.7223	27.5136	28.2885	27.4852	26.722	27.243	26.8266	28.418	27.0834	26.7718	26.3618	28.2856	26.9626	26.1251	27.241	26.3535		Lerp	275		positive regulation of apoptotic process [GO:0043065];positive regulation of autophagy [GO:0010508];post-Golgi vesicle-mediated transport [GO:0006892];post-Golgi vesicle-mediated transport [GO:0006892]";response to retinoic acid [GO:0032526]";"lysosomal transport [GO:0007041]	cytoplasm [GO:0005737];early endosome [GO:0005769];endocytic vesicle [GO:0030139];integral component of membrane [GO:0016021];late endosome [GO:0005770];nuclear envelope lumen [GO:0005641];perinuclear region of cytoplasm [GO:0048471];plasma membrane [GO:0005886];trans-Golgi network [GO:0005802];trans-Golgi network [GO:0005802]";trans-Golgi network transport vesicle [GO:0030140]";"clathrin-coated …	insulin-like growth factor binding [GO:0005520];insulin-like growth factor II binding [GO:0031995];kringle domain binding [GO:0036143];mannose binding [GO:0005537];phosphoprotein binding [GO:0051219];retinoic acid binding [GO:0001972];signaling receptor activity [GO:0038023]";"G-protein alpha-subunit binding [GO:0001965];"phosphoprotein binding [GO:0051219]	13	13	19.1	97.154	0	37.105	1546200000	57	1.72454	0.0531955	0.480336	-0.357676	0.403028	0.630102	0.668742	0.60425	1.29561	1.18924	0.480336	-0.357676	1.18058	-0.987778
NaN	NaN	NaN	NaN	NaN	NaN	NaN	NaN	NaN	NaN	22.4802	NaN	24.9594	25.1596	NaN	NaN	NaN	NaN	NaN	NaN	24.7117			276					1	1	8.8	20.496	0.00017541	4.0835	57430000	1	0	1	0	NaN	0	NaN	0	-0.511918	0	NaN	0	NaN	-4.34294e-08	0
28.4632	29.9735	28.671	28.5738	28.9246	27.7068	28.9933	28.5968	28.6233	28.8072	31.3093	29.7186	31.3569	28.6264	30.8211	28.4454	30.5842	28.4105	28.048	29.5375	29.724	Putative SERF-like protein	CG17931	277			cytosol [GO:0005829]		4	4	53.3	6.8847	0	46.985	9114000000	133	0.767907	0.242411	0.287509	-0.384343	0.0161553	0.0435136	0.590776	1.00341	0.267842	-0.365365	0.287509	-0.384343	0.27693	-0.427856
NaN	NaN	24.727	23.6092	NaN	24.2144	24.6734	NaN	23.1007	25.828	24.5121	NaN	NaN	NaN	24.5003	25.0388	NaN	25.3788	23.1975	25.0134	NaN			278		regulation of transcription, DNA-templated [GO:0006355]	nucleus [GO:0005634]	zinc ion binding [GO:0008270]";"nucleic acid binding [GO:0003676];"transcription regulatory region sequence-specific DNA binding [GO:0000976]	7	7	7.1	135.7	0.00085353	2.6986	213390000	11	0.368277	0.502236	0.0324774	0.0780849	0.450105	1.10338	0.385692	0.841363	0.0592423	-0.218386	0.0324774	0.0780849	0.99954	-1.0253
26.3525	24.9321	25.1285	25.7227	24.8052	NaN	25.2871	25.8112	NaN	24.7562	24.4862	25.3737	23.9491	25.3316	25.441	NaN	NaN	NaN	25.6396	NaN	26.066		ema	279		endosomal transport [GO:0016197];endosome to lysosome transport [GO:0008333]";"autophagy [GO:0006914];"endosomal transport [GO:0016197]	endolysosome membrane [GO:0036020];Golgi apparatus [GO:0005794];Golgi membrane [GO:0000139];integral component of membrane [GO:0016021];late endosome [GO:0005770];late endosome [GO:0005770]";late endosome membrane [GO:0031902]";"autophagosome membrane [GO:0000421];"Golgi apparatus [GO:0005794]	Rab GTPase binding [GO:0017137]	7	7	7.6	114.95	0	12.884	350830000	17	0.673925	0.311914	0.408069	-0.464593	0	NaN	1.0955	-0.963159	0.333875	-0.303658	0.408069	-0.464593	0	NaN
33.2518	32.7602	33.3513	33.0782	32.7513	33.0047	32.9612	32.5357	33.1231	32.7424	32.7043	32.6223	32.2769	32.657	32.3253	32.713	32.4749	32.9739	32.8877	32.6718	32.885	Fasciclin-1	Fas1	280		calcium-independent cell-cell adhesion via plasma membrane cell-adhesion molecules [GO:0016338];homophilic cell adhesion via plasma membrane adhesion molecules [GO:0007156];neuron recognition [GO:0008038]";"axon guidance [GO:0007411]	plasma membrane [GO:0005886]";"anchored component of membrane [GO:0031225]	cell adhesion molecule binding [GO:0050839]	37	37	53.7	69.486	0	323.31	86672000000	850	1.47075	0.125541	0.693906	0.218077	0.229465	-0.0942154	1.07754	-0.260124	0.11206	0.0585136	0.693906	0.218077	0.92773	0.312293
28.5392	29.2194	26.871	30.1979	30.2936	27.2343	30.4309	30.2141	26.9937	26.2285	29.1985	NaN	28.6999	26.7985	25.1424	24.9741	29.3202	27.6299	30.005	29.4028	26.2583		m-cup	281		protein ubiquitination [GO:0016567]		ubiquitin-protein transferase activity [GO:0004842]	4	4	6.4	80.088	0.00018162	6.4964	5946200000	51	0.349486	0.507548	0.052203	0.170543	0.294242	-1.24733	0.456597	-1.34182	0.152737	0.657512	0.052203	0.170543	0.559015	1.41787
28.7115	27.8224	28.1876	28.1313	28.3432	28.1532	28.8429	29.1918	28.7582	28.271	28.8514	28.5712	28.9428	28.5831	28.3971	27.5291	27.9668	28.1073	28.1008	28.7167	28.2767	Leucine-rich repeat protein soc-2 homolog	Sur-8	282	+	protein dephosphorylation [GO:0006470]";"positive regulation of Ras protein signal transduction [GO:0046579]	photoreceptor outer segment membrane [GO:0042622]";"photoreceptor inner segment [GO:0001917]	protein serine/threonine phosphatase activity [GO:0004722]	18	18	34.6	69.371	0	205.28	4331900000	135	2.67808	0.0194435	0.275263	-0.139874	0.918669	-0.497044	0.581892	0.237993	1.17709	0.566209	0.275263	-0.139874	0.883376	0.357169
28.6351	28.4223	28.3296	27.884	27.5851	28.1227	28.1162	28.348	27.96	28.0964	28.0877	28.4163	28.64	28.4475	28.3474	28.7437	29.1685	29.4844	28.0982	28.1345	27.5353		CtBP	283	+			hydroxypyruvate reductase activity [GO:0016618];NAD binding [GO:0051287]";"glyoxylate reductase (NADP) activity [GO:0030267]	31	0	58.1	50.362	0	50.635	4093700000	43	2.73195	0.0165353	0.410749	0.240436	1.85693	1.20953	1.2645	0.416528	0.414815	0.218731	0.410749	0.240436	2.06555	-0.96909
32.0091	31.9762	32.5619	31.9199	31.9801	31.7238	32.1564	32.369	32.2278	31.9242	31.3601	32.1194	31.6566	31.8846	31.7574	32.0471	31.9097	32.3698	31.7396	31.3388	31.5311		PP2A-B	284		negative regulation of apoptotic process [GO:0043066];negative regulation of insulin receptor signaling pathway [GO:0046627];negative regulation of TORC1 signaling [GO:1904262];neuromuscular junction development [GO:0007528];neuromuscular synaptic transmission [GO:0007274];protein dephosphorylation [GO:0006470];regulation of protein autophosphorylation [GO:0031952];signal transduction [GO:0007165…	nucleus [GO:0005634];protein phosphatase type 2A complex [GO:0000159]";"cytosol [GO:0005829]	protein phosphatase regulator activity [GO:0019888]";"protein phosphatase activator activity [GO:0072542]	31	3	45.2	79.069	0	323.31	51029000000	586	1.88242	0.066967	1.49563	0.491995	1.48284	0.572331	0.707436	0.247225	2.25439	0.714561	1.49563	0.491995	0.164101	-0.0803356
26.8275	26.7129	NaN	27.9986	27.3192	26.7698	27.6268	27.6952	27.4731	27.7304	27.454	27.3477	27.9897	28.1116	27.9354	27.9672	26.3302	27.2763	28.1252	27.2705	27.3651			285		N-glycan processing [GO:0006491]			3	3	16.9	23.457	0	44.708	2360300000	49	0.617777	0.35766	0.568131	-0.461364	0.293418	-0.39573	0.287452	0.174494	0.0135217	0.0113824	0.568131	-0.461364	0.0483825	-0.0656342
24.6973	NaN	NaN	29.3028	28.23	28.2252	27.3067	27.1185	26.9183	28.7261	28.9945	27.3537	29.2675	27.0406	28.5733	NaN	28.8969	28.2469	27.721	27.4056	27.0502	Mitochondrial pyruvate carrier 1	Mpc1	286		pyruvate metabolic process [GO:0006090]";"mitochondrial pyruvate transmembrane transport [GO:0006850];mitochondrial pyruvate transmembrane transport [GO:0006850]	mitochondrion [GO:0005739]";"integral component of mitochondrial inner membrane [GO:0031305];mitochondrial inner membrane [GO:0005743]	pyruvate transmembrane transporter activity [GO:0050833]	4	4	61.7	12.261	0	27.606	2996400000	39	0.328399	0.53632	0.0651265	0.221556	1.36817	1.17965	0.857348	0.93369	0.548962	-0.277743	0.0651265	0.221556	0.249712	-0.958091
25.5908	27.2829	25.8744	25.7392	25.7453	24.2122	26.6881	27.7127	27.3192	26.5604	26.3107	NaN	25.3528	24.4251	26.9002	26.15	27.4192	NaN	24.6968	NaN	NaN			287					3	3	5.3	45.955	0.00017696	4.6069	967260000	23	0.85386	0.212031	0	1.04397	0	2.0878	0	1.21299	0	2.54317	0	1.04397	0.63363	-1.04382
29.7808	29.6691	29.5908	29.6831	28.3942	29.0702	29.5245	29.0487	29.8997	28.7413	29.749	29.2205	28.861	28.8032	28.3374	28.9539	29.2642	29.1499	29.7922	28.9525	28.504			288				DNA binding [GO:0003677]	13	13	34.1	34.676	0	26.735	6193200000	72	0.298164	0.609479	0.292872	0.281825	0.0346557	0.039793	0.130528	-0.130791	0.380383	0.408063	0.292872	0.281825	0.315886	0.242032
35.7341	35.6913	35.9975	35.9658	35.7324	35.877	35.8663	35.6575	35.8767	36.0581	35.5707	35.8775	35.7509	35.9861	36.0586	35.6882	35.2494	35.6575	35.968	35.6936	35.6966	26S proteasome non-ATPase regulatory subunit 1	Rpn2	289		regulation of protein catabolic process [GO:0042176]";"proteasome-mediated ubiquitin-dependent protein catabolic process [GO:0043161];regulation of protein catabolic process [GO:0042176]	nucleoplasm [GO:0005654];nucleus [GO:0005634];proteasome complex [GO:0000502];proteasome regulatory particle [GO:0005838];proteasome regulatory particle, base subcomplex [GO:0008540];proteasome storage granule [GO:0034515]";"cytosol [GO:0005829];proteasome regulatory particle, base subcomplex [GO:0008540]	zinc ion binding [GO:0008270]";"enzyme regulator activity [GO:0030234];enzyme regulator activity [GO:0030234]	76	76	76.4	113.2	0	323.31	745060000000	3429	0.951608	0.313615	0.188178	0.0469882	0.688318	-0.254328	0.321124	0.0976041	0.0416363	0.0141385	0.188178	0.0469882	1.37472	0.301317
36.3567	36.334	36.0951	35.9312	36.2102	36.1474	36.0934	35.6531	36.1591	35.6878	35.5401	35.6922	35.6277	35.6861	35.6638	35.8616	35.863	35.8186	36.1132	36.2669	36.2087	Ferritin	Fer2LCH	290	+	cellular response to iron ion starvation [GO:0010106];detoxification of iron ion [GO:1990461];hemolymph coagulation [GO:0042381];intracellular sequestering of iron ion [GO:0006880];iron ion import across plasma membrane [GO:0098711];locomotor rhythm [GO:0045475];response to fungus [GO:0009620]";"cellular iron ion homeostasis [GO:0006879]	endomembrane system [GO:0012505];extracellular region [GO:0005576];Golgi apparatus [GO:0005794];intracellular ferritin complex [GO:0008043]";"cytoplasm [GO:0005737];"endomembrane system [GO:0012505]	ferrous iron binding [GO:0008198];ferroxidase activity [GO:0004322];ferroxidase activity [GO:0004322]";identical protein binding [GO:0042802];iron ion binding [GO:0005506]";"ferric iron binding [GO:0008199]	26	26	79.3	25.242	0	323.31	722350000000	1557	4.34853	0.00419672	0.0616616	-0.017168	2.74951	-0.348587	5.18293	-0.546671	0.620297	-0.227762	0.0616616	-0.017168	1.98604	0.331419
30.1753	30.2015	30.294	30.277	29.728	29.1182	29.8902	29.8479	30.0659	30.5975	30.0861	29.7608	30.319	30.2541	30.102	30.2111	30.1202	30.2454	30.1553	30.0581	29.8282	Nicastrin	nct	291		lateral inhibition [GO:0046331];membrane protein ectodomain proteolysis [GO:0006509];Notch receptor processing [GO:0007220];Notch signaling pathway [GO:0007219];photoreceptor cell morphogenesis [GO:0008594];protein processing [GO:0016485];R8 cell development [GO:0045463];regulation of compound eye photoreceptor development [GO:0045314]";"cytoskeleton organization [GO:0007010];protein processing […	integral component of plasma membrane [GO:0005887];late endosome [GO:0005770];plasma membrane [GO:0005886];recycling endosome [GO:0055037]";"gamma-secretase complex [GO:0070765];integral component of membrane [GO:0016021]	endopeptidase activity [GO:0004175]	23	23	35.4	77.675	0	323.31	13544000000	260	0.199125	0.750867	0.060316	-0.0482225	0.792068	0.178317	0.437216	0.17272	0.269354	-0.0792446	0.060316	-0.0482225	0.353531	-0.226539
29.2485	28.6354	27.6283	28.0467	28.032	28.3939	28.1784	28.2008	27.2779	29.1587	28.3007	28.855	27.8031	28.3019	27.5964	28.0978	29.0583	28.5225	28.3411	29.0152	28.1276	E3 ubiquitin-protein ligase HRD1	sip3	292		intestinal stem cell homeostasis [GO:0036335];protein K48-linked ubiquitination [GO:0070936];protein ubiquitination [GO:0016567];regulation of translation in response to endoplasmic reticulum stress [GO:0036490];response to endoplasmic reticulum stress [GO:0034976];retrograde protein transport, ER to cytosol [GO:0030970];ubiquitin-dependent ERAD pathway [GO:0030433];ubiquitin-dependent protein ca…	endoplasmic reticulum [GO:0005783];Hrd1p ubiquitin ligase complex [GO:0000836];integral component of membrane [GO:0016021]";"Derlin-1 retrotranslocation complex [GO:0036513];"Hrd1p ubiquitin ligase complex [GO:0000836]	ubiquitin protein ligase activity [GO:0061630];ubiquitin-protein transferase activity [GO:0004842];ubiquitin-specific protease binding [GO:1990381];unfolded protein binding [GO:0051082];zinc ion binding [GO:0008270]";"p53 binding [GO:0002039];ubiquitin protein ligase activity [GO:0061630]	12	12	19.6	69.272	0	81.211	4255000000	103	0.214382	0.693138	0.167446	-0.163837	0.0582486	0.0649287	0.153998	-0.158668	0.683916	-0.60891	0.167446	-0.163837	0.243954	-0.228766
28.9268	29.2903	27.059	28.9679	29.3944	28.1878	28.2304	29.1958	27.6385	29.5381	29.3448	28.7547	30.0194	27.1394	28.12	28.6166	29.1668	28.9796	28.1508	29.081	27.8733		dgt1	293		histone H4-K5 acetylation [GO:0043981];histone H4-K8 acetylation [GO:0043982]";"histone H4-K16 acetylation [GO:0043984]	nucleus [GO:0005634]";"NSL complex [GO:0044545]	histone acetyltransferase activity [GO:0004402]	20	20	49.2	49.433	0	107.05	5114700000	120	0.0609806	0.89499	0.183281	0.269305	0.622298	0.552621	0.280254	0.451007	0.00760285	-0.0134805	0.183281	0.269305	0.211614	-0.283317
28.4017	27.5818	25.6313	28.0534	28.3183	25.5818	28.5872	28.5345	26.265	28.8459	28.5548	27.6036	28.4675	27.2461	28.1294	27.3743	28.8225	27.5654	27.6699	27.3158	24.7404	Nicotinamide-nucleotide adenylyltransferase	Nmnat	294		dendritic spine maintenance [GO:0097062];photoreceptor cell maintenance [GO:0045494]";"'de novo' NAD biosynthetic process from aspartate [GO:0034628]	neuronal cell body [GO:0043025]";"cytoplasm [GO:0005737]	nicotinamide-nucleotide adenylyltransferase activity [GO:0000309];nicotinate-nucleotide adenylyltransferase activity [GO:0004515];unfolded protein binding [GO:0051082]";"ATP binding [GO:0005524]	14	14	48.9	40.053	0	83.183	2859800000	90	0.448367	0.432417	0.291637	0.68602	0.583216	1.34539	1.20717	1.56588	0.435991	1.22021	0.291637	0.68602	0.339241	-0.659374
33.0226	32.7941	33.4462	32.7512	33.1226	33.3925	33.1609	32.8984	33.2497	32.7556	32.8538	33.1759	32.5065	33.0403	33.1634	33.7615	32.8914	32.3567	33.2581	32.8892	33.2325	Ubiquitin-conjugating enzyme E2-17 kDa	eff	295		chromosome organization [GO:0051276];compound eye morphogenesis [GO:0001745];compound eye photoreceptor cell differentiation [GO:0001751];female germ-line stem cell asymmetric division [GO:0048132];germ-line stem cell population maintenance [GO:0030718];male meiotic nuclear division [GO:0007140];mitotic cell cycle [GO:0000278];neuron remodeling [GO:0016322];protein linear polyubiquitination [GO:0…	ubiquitin ligase complex [GO:0000151]";"cytosol [GO:0005829]	transferase activity [GO:0016740]";ubiquitin conjugating enzyme activity [GO:0061631];ubiquitin protein ligase activity [GO:0061630];ubiquitin protein ligase binding [GO:0031625]";"ATP binding [GO:0005524]	8	8	53.1	16.678	0	318.93	90999000000	413	0.058506	0.920332	0.0724089	-0.0384045	0.104246	-0.1234	0.57414	-0.210662	0.0510741	-0.0236244	0.0724089	-0.0384045	0.0979628	0.0849959
33.9956	33.762	34.0999	33.9979	33.6086	33.8371	33.8096	33.4198	33.5839	34.0007	33.7041	34.2046	33.5769	33.9445	33.7295	33.8596	33.5446	34.2681	34.1355	33.7537	33.6881	Glycogen [starch] synthase	GlyS	296		cellular response to sucrose stimulus [GO:0071329];glycogen biosynthetic process [GO:0005978];glycogen metabolic process [GO:0005977];glycophagy [GO:0061723];positive regulation of glycogen catabolic process [GO:0045819];response to glucose [GO:0009749];response to sucrose [GO:0009744]";"cellular response to starvation [GO:0009267];glycogen biosynthetic process [GO:0005978]	cytoplasm [GO:0005737];cytoplasmic vesicle [GO:0031410]";"autophagosome [GO:0005776]	glycogen (starch) synthase activity [GO:0004373];glycogen synthase activity, transferring glucose-1-phosphate [GO:0061547];protein kinase binding [GO:0019901]";"glucose binding [GO:0005536];glycogen (starch) synthase activity [GO:0004373]	54	54	75.2	79.233	0	323.31	183990000000	1399	0.288014	0.684809	0.0613043	0.0243905	0.0428359	0.0316175	0.0018823	0.00093015	0.640276	-0.254712	0.0613043	0.0243905	0.0140388	-0.00722694
30.5998	30.5112	30.3394	30.1552	30.282	30.2718	30.4136	30.2359	30.3246	30.4464	30.6388	30.7287	30.272	29.9311	30.068	30.1671	30.3222	30.2733	29.8957	30.1823	30.1848	NuA4 complex subunit EAF3 homolog	MRG15	297		chromosome organization [GO:0051276];chromosome separation [GO:0051304];DNA repair [GO:0006281];histone acetylation [GO:0016573];histone deacetylation [GO:0016575];histone exchange [GO:0043486];histone H2A acetylation [GO:0043968];histone H4 acetylation [GO:0043967];positive regulation of gene expression [GO:0010628];positive regulation of histone H3-K36 methylation [GO:0000416]";transcription, D…	histone methyltransferase complex [GO:0035097];NuA4 histone acetyltransferase complex [GO:0035267];nucleus [GO:0005634]";"histone acetyltransferase complex [GO:0000123];nucleus [GO:0005634]	enzyme regulator activity [GO:0030234];methylated histone binding [GO:0035064]";"chromatin binding [GO:0003682];histone acetyltransferase activity [GO:0004402]	17	17	41.7	47.723	0	323.31	14487000000	254	0.357731	0.636404	1.27611	0.272256	0.716137	0.166569	0.634401	0.259884	1.02295	0.237084	1.27611	0.272256	0.468526	0.105687
28.0349	28.6114	26.9527	27.6473	27.3455	25.8847	29.0588	28.7531	27.1914	28.4207	27.5107	26.5756	28.2269	24.2468	26.0984	27.856	26.9542	27.9905	25.2906	28.0841	25.3958		Dhap-at	298		fatty acid metabolic process [GO:0006631];phospholipid biosynthetic process [GO:0008654]";"ether lipid biosynthetic process [GO:0008611];ether lipid biosynthetic process [GO:0008611]	mitochondrial membrane [GO:0031966];peroxisomal membrane [GO:0005778];peroxisome [GO:0005777]";"integral component of membrane [GO:0016021];"peroxisomal membrane [GO:0005778]	glycerone-phosphate O-acyltransferase activity [GO:0016287]	16	16	22.7	82.524	0	12.944	2136100000	68	0.513509	0.379871	0.694375	1.15591	0.62264	1.34336	0.213608	0.589664	0.895623	2.07756	0.694375	1.15591	0.116681	-0.187445
34.1764	34.7271	34.4668	34.2688	34.6252	34.5106	34.3081	34.3789	34.4472	34.1525	34.2981	34.6744	34.7807	34.768	34.75	34.2963	34.3667	34.6783	34.3438	34.7846	34.5216	MICOS complex subunit Mic60	CG6455	299		mitochondrion morphogenesis [GO:0070584]	mitochondrial inner membrane [GO:0005743];mitochondrial inner membrane [GO:0005743]";mitochondrion [GO:0005739]";"integral component of membrane [GO:0016021]		83	83	73.6	82.013	0	323.31	277820000000	1774	0.131739	0.855803	0.237456	-0.08752	0.232492	-0.102896	0.0390587	0.0205911	0.569746	-0.17195	0.237456	-0.08752	0.0364915	0.0153764
NaN	25.3492	25.6991	24.5591	NaN	NaN	24.6361	25.4366	NaN	25.62	24.6458	25.1646	NaN	NaN	24.9568	NaN	NaN	NaN	25.7098	25.1006	25.4393		CSN5	300					20	1	62.8	36.87	0.00068764	3.0372	226650000	8	0.110679	0.836273	0.219207	-0.214083	0	NaN	0.508406	-0.319756	0.413961	-0.380195	0.219207	-0.214083	0	NaN
NaN	22.7396	NaN	NaN	NaN	NaN	NaN	22.9862	NaN	NaN	NaN	NaN	NaN	NaN	NaN	24.861	NaN	NaN	22.6503	NaN	NaN		PP2A-B	302		negative regulation of apoptotic process [GO:0043066];neuromuscular junction development [GO:0007528];neuromuscular synaptic transmission [GO:0007274];regulation of protein autophosphorylation [GO:0031952];signal transduction [GO:0007165];synaptic vesicle localization [GO:0097479]";"autophagy [GO:0006914]	nucleus [GO:0005634];protein phosphatase type 2A complex [GO:0000159]";"cytosol [GO:0005829]	protein phosphatase regulator activity [GO:0019888]";"protein phosphatase activator activity [GO:0072542]	29	1	46.1	75.266	0.0023502	2.1489	26481000	1	NaN	NaN	0	0.0893536	0	2.21069	0	NaN	0	0.335934	0	0.0893536	0	-2.12134
29.7395	29.883	29.9743	29.4632	29.6052	29.5335	29.7275	29.6818	29.9017	29.7115	29.4575	29.9174	30.08	30.147	29.7986	29.5776	29.7723	29.3706	29.9654	29.3687	29.7015	Uncharacterized protein CG4449	CG4449-RA;CG4449	303		double-strand break repair via homologous recombination [GO:0000724]	nuclear periphery [GO:0034399]		18	18	33.7	47.459	0	76.564	10102000000	175	0.308976	0.670956	0.0451576	0.0212501	0.193772	-0.105046	0.409667	0.173468	0.18968	0.0917848	0.0451576	0.0212501	0.39308	0.126296
29.3771	29.1716	29.393	29.2933	28.7667	29.0543	29.3205	29.3894	29.5975	29.0716	28.8261	28.8704	28.3117	28.6885	28.9276	29.376	29.3017	29.6213	28.6811	29.192	28.8348	Serine/threonine-protein kinase pelle	pll	304	+	apoptotic process [GO:0006915];defense response [GO:0006952];determination of dorsal/ventral asymmetry [GO:0048262];dorsal/ventral axis specification [GO:0009950];hemocyte proliferation [GO:0035172];hemopoiesis [GO:0030097];innate immune response [GO:0045087];intracellular signal transduction [GO:0035556];larval somatic muscle development [GO:0007526];protein autophosphorylation [GO:0046777];prot…	cytosol [GO:0005829];nucleus [GO:0005634];plasma membrane [GO:0005886]";"cytoplasm [GO:0005737]	protein domain specific binding [GO:0019904];protein kinase activity [GO:0004672];protein kinase activity [GO:0004672]";protein serine/threonine kinase activity [GO:0004674]";"ATP binding [GO:0005524]	21	21	45.5	56.159	0	190.07	6482900000	191	2.61226	0.0245062	0.798719	0.273368	1.37903	0.530373	0.26873	-0.119965	1.43544	0.533195	0.798719	0.273368	0.845042	-0.257004
25.8173	25.3606	24.4958	24.8609	24.7686	24.4634	25.7267	25.8336	25.4146	24.7169	24.9686	24.4456	24.8357	NaN	25.251	NaN	NaN	NaN	25.3105	24.4538	NaN	Protein UBASH3A homolog	CG13604	305		dephosphorylation [GO:0016311]	cytosol [GO:0005829]	hydrolase activity [GO:0016787];phosphatase activity [GO:0016791]	5	5	9.5	80.794	0.00034801	3.6426	317990000	12	0.986615	0.201793	0.0632179	0.0789881	0	NaN	0.0417828	-0.0385542	0.925274	0.77619	0.0632179	0.0789881	0	NaN
33.3706	33.3398	33.3543	32.948	33.1145	33.0389	33.1526	33.2429	33.2873	33.1488	33.1641	33.4081	33.256	33.4565	33.4327	33.3761	33.1173	33.3823	32.9629	33.0464	33.1691	Ankyrin repeat and KH domain-containing protein mask	mask	306		compound eye photoreceptor cell differentiation [GO:0001751];flight [GO:0060361];mitochondrion organization [GO:0007005];negative regulation of apoptotic process [GO:0043066];negative regulation of autophagy of mitochondrion [GO:1903147];sarcomere organization [GO:0045214];transmembrane receptor protein tyrosine kinase signaling pathway [GO:0007169]";"antimicrobial humoral response [GO:0019730]	cytosol [GO:0005829];M band [GO:0031430];Z disc [GO:0030018]";"cytoplasm [GO:0005737];integral component of membrane [GO:0016021]	RNA binding [GO:0003723]";"protein kinase binding [GO:0019901];RNA binding [GO:0003723]	134	134	39.2	423.07	0	323.31	118110000000	1779	0.702173	0.46896	0.544313	0.134886	1.03076	0.232414	1.54022	0.251563	1.10093	0.168157	0.544313	0.134886	0.340207	-0.0975278
NaN	24.3109	24.88	24.1954	23.5844	24.3776	25.1161	24.5342	24.566	NaN	NaN	NaN	NaN	NaN	23.8061	NaN	NaN	NaN	NaN	24.979	NaN		mira	307		asymmetric neuroblast division [GO:0055059];asymmetric protein localization involved in cell fate determination [GO:0045167];ganglion mother cell fate determination [GO:0007402];intracellular mRNA localization [GO:0008298];neuroblast fate determination [GO:0007400];neuroblast proliferation [GO:0007405];oogenesis [GO:0048477];protein localization to cell cortex [GO:0072697];regulation of pole plas…	apical part of cell [GO:0045177];apical plasma membrane [GO:0016324];basal cortex [GO:0045180];basal part of cell [GO:0045178];basal plasma membrane [GO:0009925];cell cortex [GO:0005938];centrosome [GO:0005813];cytoplasm [GO:0005737]";"apical cortex [GO:0045179]	myosin binding [GO:0017022]";"actin binding [GO:0003779]	50	1	68.3	90.477	0.00017976	5.755	104680000	5	0.744901	0.338258	0	-0.709334	0	NaN	0	-1.1729	0	-0.240199	0	-0.709334	0	NaN
29.9127	28.9945	29.1778	28.9491	28.9252	28.2822	28.8156	28.6243	28.7605	29.2361	29.0819	29.343	28.4446	29.1813	28.8481	30.13	29.5922	29.4974	28.196	29.2996	29.2379	Serine/threonine-protein phosphatase;Serine/threonine-protein phosphatase alpha-1 isoform	Pp1alpha-96A	308		circadian rhythm [GO:0007623];defense response to Gram-negative bacterium [GO:0050829];positive regulation of canonical Wnt signaling pathway [GO:0090263];positive regulation of innate immune response [GO:0045089];protein dephosphorylation [GO:0006470]";"beta-catenin destruction complex disassembly [GO:1904886];protein dephosphorylation [GO:0006470]	protein phosphatase type 1 complex [GO:0000164]";"cytosol [GO:0005829];protein phosphatase type 1 complex [GO:0000164]	protein serine/threonine phosphatase activity [GO:0004722]";"metal ion binding [GO:0046872]	18	4	63.6	37.37	0	167.26	6457500000	86	1.04061	0.181791	0.124142	0.129073	0.948951	0.828722	0.138649	0.111335	0.187303	-0.177706	0.124142	0.129073	1.10742	-0.699649
30.7309	30.5145	30.6452	30.1316	29.8748	29.49	30.1289	30.2598	30.2485	30.1092	29.9256	30.8179	30.0304	30.0979	29.5055	30.8666	30.3079	31.0771	30.6413	30.1162	30.4964	G2/mitotic-specific cyclin-B3	CycB3	309		mitotic cytokinesis [GO:0000281];positive regulation of cell cycle [GO:0045787];positive regulation of cell proliferation [GO:0008284];protein phosphorylation [GO:0006468];regulation of chromatin binding [GO:0035561];regulation of cyclin-dependent protein serine/threonine kinase activity [GO:0000079];regulation of G2/M transition of mitotic cell cycle [GO:0010389];regulation of G2/M transition of…	cyclin-dependent protein kinase holoenzyme complex [GO:0000307];cytoplasm [GO:0005737];nucleus [GO:0005634]";"centrosome [GO:0005813];nucleus [GO:0005634]	protein kinase binding [GO:0019901]";"cyclin-dependent protein serine/threonine kinase regulator activity [GO:0016538];protein kinase binding [GO:0019901]	25	25	52.7	64.771	0	280.35	14930000000	282	0.622439	0.371615	0.248475	-0.186787	0.526724	0.332572	0.588024	-0.336866	0.563021	-0.205535	0.248475	-0.186787	0.803943	-0.519358
28.6072	29.5972	28.5995	28.248	29.9498	26.8023	28.4787	29.1981	27.8345	29.1787	29.6916	28.3184	28.886	28.4845	29.231	27.8211	29.0967	26.5953	29.2783	29.7111	28.5264	RalA-binding protein 1	Rlip	310		positive regulation of GTPase activity [GO:0043547];receptor-mediated endocytosis [GO:0006898];regulation of Ras protein signal transduction [GO:0046578];small GTPase mediated signal transduction [GO:0007264]";"multicellular organism development [GO:0007275];small GTPase mediated signal transduction [GO:0007264]	membrane [GO:0016020]";"intracellular [GO:0005622];intracellular [GO:0005622]	Ral GTPase binding [GO:0017160]";"GTPase activator activity [GO:0005096]	15	15	28.8	71.794	0	109.64	5357600000	132	0.421314	0.464755	0.329707	-0.537961	0.767004	-1.33426	0.219915	-0.206927	0.566179	-0.66816	0.329707	-0.537961	0.442544	0.796302
26.42	27.737	26.6136	26.6321	25.7969	27.1236	28.537	28.3277	27.9668	26.9286	25.6006	25.5711	26.3958	26.8012	NaN	27.761	28.5231	27.8862	27.726	27.5257	27.5568	Protein distal antenna	dan	311	+	central nervous system formation [GO:0021556];compound eye development [GO:0048749];regulation of transcription, DNA-templated [GO:0006355];segment specification [GO:0007379]";"antennal development [GO:0007469]	nucleus [GO:0005634]	DNA-binding transcription factor activity [GO:0003700]";"DNA binding [GO:0003677];DNA binding [GO:0003677]	13	12	17.8	71.913	0	36.141	2004000000	79	3.49121	0.00362963	1.21816	-0.882294	0.865381	0.453968	1.87329	-1.34337	1.71613	0.674351	1.21816	-0.882294	1.80211	-1.33626
29.3651	28.8664	28.4578	29.002	29.1401	28.9004	29.1458	29.1784	29.5183	29.345	29.4426	29.0197	29.4336	28.8518	29.5127	29.2335	29.531	27.9824	29.2802	29.0985	28.6153	Furin-like protease 1, isoform 1-CRR;Furin-like protease 1, isoforms 1/1-X/2	Fur1	312		postsynaptic membrane organization [GO:0001941];presynaptic membrane organization [GO:0097090];synaptic target recognition [GO:0008039]";"glutamate receptor clustering [GO:0097688]	integral component of membrane [GO:0016021];plasma membrane [GO:0005886]";"Golgi membrane [GO:0000139];integral component of membrane [GO:0016021]	hydrolase activity [GO:0016787];serine-type endopeptidase activity [GO:0004252]	22	22	17.5	161.73	0	139.45	6655200000	164	0.284377	0.637995	0.0686751	-0.0427367	0.0552992	-0.0824172	0.633992	0.269542	0.539473	0.282818	0.0686751	-0.0427367	0.0384364	0.0396805
28.4607	26.6498	27.231	27.4413	27.1877	26.1853	28.4147	28.5215	25.5682	27.1546	27.9028	26.236	26.633	26.5014	26.538	28.3085	27.9001	27.0746	25.6095	24.8104	24.6695	Axin	Axn	313	+	circadian rhythm [GO:0007623];dorsal/ventral pattern formation, imaginal disc [GO:0007450];eye-antennal disc morphogenesis [GO:0007455];heart development [GO:0007507];imaginal disc-derived wing margin morphogenesis [GO:0008587];negative regulation of canonical Wnt signaling pathway [GO:0090090];oogenesis [GO:0048477];ovarian follicle cell development [GO:0030707];positive regulation of proteasoma…	cytoplasm [GO:0005737];cytosol [GO:0005829];nucleus [GO:0005634];plasma membrane [GO:0005886]";"beta-catenin destruction complex [GO:0030877];beta-catenin destruction complex [GO:0030877]	protein kinase binding [GO:0019901];protein-containing complex scaffold activity [GO:0032947];receptor signaling complex scaffold activity [GO:0030159];signaling receptor binding [GO:0005102]";"beta-catenin binding [GO:0008013];receptor signaling complex scaffold activity [GO:0030159]	22	22	31.5	76.311	0	45.354	1714700000	59	2.042	0.0286119	2.46311	2.16283	2.37282	2.73126	2.49188	1.79783	1.15031	2.47168	2.46311	2.16283	0.509117	-0.568427
29.3373	29.6597	29.1663	29.5017	29.0669	29.2858	29.2091	29.41	29.2304	29.6387	29.449	29.5577	29.5768	29.4349	29.3452	29.2787	29.9881	28.8638	29.2531	28.717	28.8797	Bifunctional arginine demethylase and lysyl-hydroxylase PSR	PSR	314		chromatin organization [GO:0006325];negative regulation of apoptotic process [GO:0043066];negative regulation of JNK cascade [GO:0046329];peptidyl-lysine hydroxylation to 5-hydroxy-L-lysine [GO:0018395]";"cell competition in a multicellular organism [GO:0035212]	nucleus [GO:0005634]	peptidyl-lysine 5-dioxygenase activity [GO:0070815]";"metal ion binding [GO:0046872]	19	19	45.1	50.927	0	209.82	8469700000	225	0.94879	0.253211	1.27458	0.38632	0.513351	0.426885	2.54802	0.550427	0.909507	0.333206	1.27458	0.38632	0.0573923	-0.0405645
34.1913	33.9815	34.2359	34.2054	33.8217	34.0186	33.7828	33.6891	33.7177	34.0021	33.7822	33.9595	34.0571	34.3044	34.0594	33.6575	33.7434	34.008	34.1559	33.8612	33.9778		aralar1	315			integral component of membrane [GO:0016021]	transmembrane transporter activity [GO:0022857]";"calcium ion binding [GO:0005509]	54	2	75.2	76.51	0	323.31	192730000000	1387	1.51665	0.156341	0.290319	0.0774663	0.649574	-0.195288	0.0923899	0.0291926	1.39009	-0.2684	0.290319	0.0774663	1.25096	0.272755
NaN	24.568	24.6418	NaN	NaN	NaN	NaN	NaN	23.4822	NaN	24.4617	24.7574	24.6551	NaN	24.1492	NaN	24.8003	25.1887	NaN	NaN	NaN	Probable cardiolipin synthase (CMP-forming)	CLS	316		cardiolipin biosynthetic process [GO:0032049];glycerophospholipid biosynthetic process [GO:0046474];mitochondrial membrane organization [GO:0007006]";"ATP biosynthetic process [GO:0006754];phospholipid biosynthetic process [GO:0008654]	mitochondrial inner membrane [GO:0005743];mitochondrion [GO:0005739]";"integral component of membrane [GO:0016021];integral component of membrane [GO:0016021]	cardiolipin synthase activity [GO:0008808];phosphotransferase activity, for other substituted phosphate groups [GO:0016780]	3	3	10.2	36.455	0	26.594	118390000	8	0.809684	0.309984	0	NaN	0	NaN	0	NaN	0	NaN	0	NaN	0.726994	-0.389571
31.8656	31.9561	31.9061	32.3111	32.1362	32.1557	31.8046	31.5962	31.6394	31.9838	32.1922	32.1143	31.4948	31.6558	32.056	32.2034	32.0798	32.2579	31.7601	31.4911	31.6119	Discs overgrown protein kinase	dco	317		cell communication [GO:0007154];cellular response to light stimulus [GO:0071482];circadian rhythm [GO:0007623];endocytosis [GO:0006897];establishment of imaginal disc-derived wing hair orientation [GO:0001737];establishment of ommatidial planar polarity [GO:0042067];imaginal disc growth [GO:0007446];locomotor rhythm [GO:0045475];negative regulation of apoptotic process [GO:0043066];negative regul…	cytoplasm [GO:0005737];cytosol [GO:0005829];nucleoplasm [GO:0005654];nucleus [GO:0005634]";"cell body [GO:0044297]	protein serine/threonine kinase activity [GO:0004674]";"ATP binding [GO:0005524]	20	19	53.4	47.957	0	323.31	51320000000	465	2.05475	0.0627557	2.15119	0.43408	2.39861	0.559324	0.877265	0.295117	0.230491	0.0590216	2.15119	0.43408	0.539218	-0.125244
24.7569	NaN	NaN	25.3864	25.4327	25.8806	24.9966	NaN	NaN	24.5531	24.7422	25.399	24.0956	24.8042	24.7686	NaN	NaN	NaN	25.4697	NaN	NaN	N-acetyltransferase 9-like protein	CG11539	318		histone acetylation [GO:0016573]		transferase activity, transferring acyl groups other than amino-acyl groups [GO:0016747]	5	5	23	23.629	0.0062479	1.5304	269800000	14	1.26804	0.171224	0	-0.105578	0	NaN	0	-0.742635	0	-0.473154	0	-0.105578	0	NaN
32.2748	31.546	31.6398	31.8988	31.286	31.5031	25.696	25.04	25.1764	31.4084	31.5616	31.4803	31.2229	31.3433	31.3929	31.5944	31.3483	31.6557	31.6978	31.2635	31.4227	Protein toll	Tl	319	+	antimicrobial humoral response [GO:0019730];cell adhesion [GO:0007155];defense response [GO:0006952];defense response to fungus [GO:0050832];defense response to Gram-positive bacterium [GO:0050830];defense response to oomycetes [GO:0002229];dorsal/ventral axis specification [GO:0009950];embryonic pattern specification [GO:0009880];heart development [GO:0007507];hemocyte proliferation [GO:0035172]…	cleavage furrow [GO:0032154];cytoplasm [GO:0005737];early endosome [GO:0005769];external side of plasma membrane [GO:0009897];integral component of plasma membrane [GO:0005887];plasma membrane [GO:0005886];protein-containing complex [GO:0032991]";"cell surface [GO:0009986];integral component of membrane [GO:0016021]	identical protein binding [GO:0042802];TIR domain binding [GO:0070976];transmembrane signaling receptor activity [GO:0004888]";"cytokine binding [GO:0019955]	32	32	34.2	127.05	0	323.31	32372000000	405	14.8712	0	0.470094	0.230118	0.171248	0.0714696	0.223428	-0.0597579	4.88692	-6.1572	0.470094	0.230118	0.311001	0.158648
25.4785	25.1526	NaN	25.4172	24.4679	NaN	25.605	25.5873	NaN	25.2523	24.7018	23.8784	NaN	NaN	NaN	NaN	NaN	NaN	NaN	NaN	24.5722	DNA-binding protein Ets97D	Ets97D	320		cellular response to starvation [GO:0009267];glutamine metabolic process [GO:0006541];mitochondrion organization [GO:0007005];pole plasm oskar mRNA localization [GO:0045451];positive regulation of oxidative phosphorylation [GO:1903862];positive regulation of transcription by RNA polymerase II [GO:0045944];regulation of transcription by RNA polymerase II [GO:0006357]";"cell differentiation [GO:003…	nucleus [GO:0005634]	sequence-specific DNA binding [GO:0043565]";"DNA-binding transcription factor activity [GO:0003700];"DNA-binding transcription factor activity, RNA polymerase II-specific [GO:0000981]	3	3	7.9	54.979	0.00017969	5.7485	216280000	9	0.729041	0.294664	0	0.556822	0	NaN	0	0.0385799	0	1.02393	0	0.556822	0	NaN
30.9299	30.9051	31.1015	30.4936	30.3935	30.1082	29.9751	30.4073	29.5596	30.54	31.1888	30.3316	30.616	30.3118	30.5259	30.4594	30.2402	30.6236	30.8509	30.5102	30.5975			321		ubiquitin-dependent protein catabolic process [GO:0006511]";"protein monoubiquitination [GO:0006513]	ubiquitin ligase complex [GO:0000151]";"cytoplasm [GO:0005737]	ubiquitin protein ligase binding [GO:0031625];ubiquitin-protein transferase activity [GO:0004842]";"ubiquitin conjugating enzyme activity [GO:0061631]	43	43	36.8	154.37	0	323.31	15845000000	374	1.06764	0.191665	0.00340282	0.00241311	0.632487	-0.21179	0.125299	-0.0672007	1.1915	-0.672208	0.00340282	0.00241311	0.396515	0.214203
32.212	32.0216	32.1885	32.0228	31.8356	32.2442	31.8299	31.9258	32.0874	32.5119	32.3119	32.2263	31.8294	32.4095	32.3567	32.4093	32.1718	32.7481	32.0601	32.0573	32.171		woc	322		regulation of transcription by RNA polymerase II [GO:0006357];regulation of transcription, DNA-templated [GO:0006355];telomere capping [GO:0016233]";"ecdysone biosynthetic process [GO:0006697]	heterochromatin [GO:0000792];nucleoplasm [GO:0005654];nucleus [GO:0005634];polytene chromosome interband [GO:0005705];polytene chromosome, telomeric region [GO:0035012];protein-containing complex [GO:0032991]";"euchromatin [GO:0000791]	zinc ion binding [GO:0008270]";"DNA-binding transcription factor activity, RNA polymerase II-specific [GO:0000981];DNA-binding transcription factor activity, RNA polymerase II-specific [GO:0000981]	62	62	38.1	188.66	0	323.31	59925000000	962	1.38886	0.15691	0.031106	-0.00868511	0.947085	0.346896	0.590221	0.178136	0.819043	-0.148446	0.031106	-0.00868511	1.36852	-0.355581
NaN	NaN	NaN	NaN	NaN	NaN	NaN	NaN	NaN	NaN	NaN	NaN	25.3138	NaN	26.389	NaN	NaN	NaN	NaN	NaN	NaN	Lipid storage droplets surface-binding protein 1	Lsd-1	323		lipid storage [GO:0019915];lipid transport [GO:0006869];positive regulation of triglyceride catabolic process [GO:0010898];protein localization to lipid droplet [GO:1990044];regulation of lipid storage [GO:0010883];triglyceride mobilization [GO:0006642]";"lipid droplet organization [GO:0034389]	lipid droplet [GO:0005811];protein-lipid complex [GO:0032994]";"cytoplasm [GO:0005737]		3	3	9.1	45.778	0	8.1312	92487000	4	NaN	NaN	-4.34294e-08	0	-4.34294e-08	0	0	NaN	-4.34294e-08	0	-4.34294e-08	0	-4.34294e-08	0
27.9969	27.6939	27.4005	27.6435	27.5368	27.405	26.9646	27.4561	27.6285	27.9303	28.1121	27.7734	27.9853	28.2079	27.4569	NaN	25.8027	NaN	27.7971	27.2918	27.5436		CG5514-RA	324		synaptic growth at neuromuscular junction [GO:0051124]";"nonassociative learning [GO:0046958]			15	15	13.7	125.38	0	31.484	2172000000	68	1.33865	0.155821	0.162233	0.0686181	0	-1.74142	1.04567	0.36681	0.323595	-0.194422	0.162233	0.0686181	0	1.81004
33.2574	33.0541	32.819	33.0183	32.9091	32.8814	32.6088	32.7271	32.6918	33.1134	33.164	33.084	33.0429	32.9704	33.0687	32.8844	32.9207	32.6473	32.8806	32.7168	32.4433	Ubiquitin carboxyl-terminal hydrolase	puf	325	+	negative regulation of innate immune response [GO:0045824];negative regulation of Toll signaling pathway [GO:0045751];positive regulation of cell growth [GO:0030307];post-translational protein modification [GO:0043687];protein deubiquitination [GO:0016579];regulation of antimicrobial peptide production [GO:0002784];regulation of gene silencing [GO:0060968];regulation of protein stability [GO:0031…	nucleus [GO:0005634]	thiol-dependent ubiquitin-specific protease activity [GO:0004843]";"cysteine-type endopeptidase activity [GO:0004197];thiol-dependent ubiquitin-specific protease activity [GO:0004843]	136	136	40.1	440.37	0	323.31	90722000000	1158	2.85063	0.0326468	1.36277	0.309689	0.37431	0.137225	2.43077	0.39369	0.0107113	-0.00429789	1.36277	0.309689	0.797249	0.172464
25.3521	23.826	NaN	NaN	NaN	NaN	26.0451	26.3353	NaN	23.9035	25.16	NaN	26.535	24.8299	25.1703	NaN	NaN	25.4059	23.7387	26.5716	NaN			326		response to endoplasmic reticulum stress [GO:0034976]			9	9	4.6	290.19	0	8.5115	278440000	15	0.245884	0.620859	0.120006	-0.566077	0	0.250804	0.0114731	-0.0353907	0.265334	1.03505	0.120006	-0.566077	0	-0.816881
28.6742	26.5056	24.5906	27.681	27.3416	25.8904	26.9126	26.712	26.1034	27.2063	25.9963	24.2094	28.3951	27.4213	25.9913	25.6652	26.0714	26.9895	27.2036	25.6402	25.4929	Tankyrase	Tnks	327		positive regulation of telomere capping [GO:1904355];positive regulation of ubiquitin-dependent protein catabolic process [GO:2000060];protein ADP-ribosylation [GO:0006471];protein localization to chromosome, telomeric region [GO:0070198];protein poly-ADP-ribosylation [GO:0070212];regulation of proteasome assembly [GO:0090364]";"positive regulation of canonical Wnt signaling pathway [GO:0090263]	nucleus [GO:0005634]";"cytoplasm [GO:0005737]	NAD+ ADP-ribosyltransferase activity [GO:0003950];scaffold protein binding [GO:0097110]";"metal ion binding [GO:0046872];NAD+ ADP-ribosyltransferase activity [GO:0003950]	16	16	14.3	165.57	0	24.475	1541300000	47	0.026811	0.950959	0.303871	0.668354	0.06729	0.129802	0.176033	0.4244	0.316971	0.463782	0.303871	0.668354	0.245883	0.538552
35.2858	34.918	34.7566	35.2857	34.732	34.7876	35.1787	35.1287	35.1934	34.2451	34.2546	34.5744	34.4993	34.8273	34.4929	34.3499	34.1287	33.8883	35.5344	35.1042	34.9907	Nucleoplasmin-like protein	Nlp	328	+	sperm chromatin decondensation [GO:0035041]";"chromatin remodeling [GO:0006338]	nucleolus [GO:0005730];nucleoplasm [GO:0005654];nucleus [GO:0005634]";"cytoplasm [GO:0005737]	histone binding [GO:0042393]";"chromatin binding [GO:0003682]	16	16	75	16.996	0	323.31	319650000000	766	4.42327	0.00215584	0.638108	-0.248802	2.16075	-1.08743	2.44836	-0.727472	0.0915252	-0.04282	0.638108	-0.248802	2.66152	0.838627
26.2472	25.8993	25.2617	24.8988	25.6159	24.3629	NaN	NaN	NaN	25.8446	25.8856	24.8274	26.084	NaN	25.215	NaN	NaN	NaN	23.9593	25.5366	NaN		LpR1	329		receptor-mediated endocytosis [GO:0006898]	integral component of membrane [GO:0016021]	cargo receptor activity [GO:0038024]";"calcium ion binding [GO:0005509];calcium ion binding [GO:0005509]	10	5	11.3	107.88	0	7.6338	306630000	11	0.407914	0.500989	0.449009	0.63298	0	NaN	0.674687	0.823368	0	NaN	0.449009	0.63298	0	NaN
30.9355	30.9333	30.4467	30.6168	30.5081	30.3685	30.0441	30.3497	30.2473	30.7305	30.9268	30.684	30.4063	30.5097	30.2831	30.1236	30.4251	28.9397	30.4778	30.4294	30.1652		Nf1	331		cAMP-mediated signaling [GO:0019933];determination of adult lifespan [GO:0008340];locomotor rhythm [GO:0045475];long-term memory [GO:0007616];negative regulation of synaptic growth at neuromuscular junction [GO:0045886];olfactory learning [GO:0008355];perineurial glial growth [GO:0042066];positive regulation of adenylate cyclase activity [GO:0045762];positive regulation of multicellular organism …	intracellular [GO:0005622]	GTPase activator activity [GO:0005096]	76	76	29.8	312.97	0	323.31	15919000000	460	1.47054	0.0994953	0.89692	0.277355	0.497104	-0.52798	0.756252	0.232591	0.470662	-0.143745	0.89692	0.277355	1.34402	0.805335
27.4554	27.1679	27.2845	25.9485	26.9693	26.0973	27.5137	26.5437	26.8544	26.654	27.241	26.0149	26.7712	24.6888	25.5693	27.064	28.0962	26.4372	26.9804	26.9966	26.2287		cindr	332		adherens junction assembly [GO:0034333];border follicle cell migration [GO:0007298];compound eye development [GO:0048749];compound eye morphogenesis [GO:0001745];intercellular bridge organization [GO:0043063];positive regulation of receptor-mediated endocytosis [GO:0048260];regulation of cytokinesis [GO:0032465]";"actin filament organization [GO:0007015]	cleavage furrow [GO:0032154];intercellular bridge [GO:0045171];midbody [GO:0030496]";"apical cortex [GO:0045179];"cleavage furrow [GO:0032154]	GTPase activating protein binding [GO:0032794];SH3 domain binding [GO:0017124]";"cell adhesion molecule binding [GO:0050839]	11	11	17.3	88.493	0	22.85	1130700000	45	0.510602	0.403524	0.0737878	0.0852095	0.353245	0.4639	0.454183	-0.578735	0.243225	0.235361	0.0737878	0.0852095	0.327579	-0.37869
33.2095	33.2285	33.3307	33.0421	33.01	33.0545	34	33.736	34.1439	33.9918	33.6151	34.2862	33.3062	33.9269	33.5909	33.6077	33.7009	34.1412	33.7654	33.5892	33.9988	Methylthioribose-1-phosphate isomerase	CG11334	333	+	L-methionine salvage from S-adenosylmethionine [GO:0019284]";"L-methionine salvage from methylthioadenosine [GO:0019509]	nucleus [GO:0005634]";"cytoplasm [GO:0005737]	S-methyl-5-thioribose-1-phosphate isomerase activity [GO:0046523]	31	31	79.7	39.108	0	323.31	167960000000	1014	3.02101	0.0127865	3.19885	-0.63857	0.0546341	0.0321299	0.00255666	0.00169754	0.448572	0.175503	3.19885	-0.63857	2.83975	-0.6707
28.2657	27.9072	27.6836	27.9786	28.9256	27.6446	27.3573	27.6557	26.5892	28.2702	27.9874	27.7615	28.4666	27.633	28.1234	27.193	27.9607	26.2453	27.9208	28.6873	27.5986	Probable glucosamine 6-phosphate N-acetyltransferase	CG1969-RB;CG1969	334		UDP-N-acetylglucosamine biosynthetic process [GO:0006048]";"N-acetylglucosamine biosynthetic process [GO:0006045];UDP-N-acetylglucosamine biosynthetic process [GO:0006048]	endoplasmic reticulum-Golgi intermediate compartment [GO:0005793];Golgi apparatus [GO:0005794]";"endoplasmic reticulum [GO:0005783]	monosaccharide binding [GO:0048029]";"glucosamine 6-phosphate N-acetyltransferase activity [GO:0004343];glucosamine 6-phosphate N-acetyltransferase activity [GO:0004343]	14	14	69.3	24.05	0	60.503	2797400000	89	1.36012	0.100366	0.00125258	-0.00132656	0.723483	-0.93587	0.0351681	-0.0285454	0.893599	-0.868151	0.00125258	-0.00132656	1.17226	0.934544
29.4717	30.1681	29.1345	28.8122	29.081	28.7849	29.3137	28.9104	29.3523	29.2985	29.3261	29.2306	29.6194	29.367	30.0057	29.0289	29.2113	29.6356	29.0534	29.2526	29.0489		spn-F	335		chaeta morphogenesis [GO:0008407];oocyte anterior/posterior axis specification [GO:0007314];oocyte axis specification [GO:0007309];oocyte microtubule cytoskeleton organization [GO:0016325];oocyte microtubule cytoskeleton polarization [GO:0008103];positive regulation of neuron remodeling [GO:1904801];regulation of pole plasm oskar mRNA localization [GO:0007317]";"cellular protein localization [GO:…	cytoplasm [GO:0005737];cytoskeleton [GO:0005856];dendrite [GO:0030425];Golgi apparatus [GO:0005794];perikaryon [GO:0043204]";"axon [GO:0030424]	ATP-dependent microtubule motor activity, minus-end-directed [GO:0008569]	18	18	54.1	40.906	0	94.909	7480800000	148	0.19089	0.748669	0.15243	0.123768	0.380194	0.173623	1.05316	0.356255	0.179496	0.0738665	0.15243	0.123768	0.0532637	-0.0498549
28.7582	28.3819	28.7636	28.5148	28.7869	28.3167	28.0867	28.4299	27.833	28.2668	28.377	28.4878	27.8681	28.2265	27.9432	28.6584	28.5086	27.6769	28.669	28.0494	28.1755	G protein-coupled receptor kinase 2	Gprk2	336		defense response to Gram-positive bacterium [GO:0050830];imaginal disc-derived wing vein specification [GO:0007474];negative regulation of smoothened signaling pathway [GO:0045879];oocyte morphogenesis [GO:0048601];positive regulation of cAMP-mediated signaling [GO:0043950];protein phosphorylation [GO:0006468];regulation of antimicrobial peptide biosynthetic process [GO:0002805];regulation of smo…	plasma membrane [GO:0005886]";"cytoplasm [GO:0005737]	G protein-coupled receptor kinase activity [GO:0004703];G protein-coupled receptor kinase activity [GO:0004703]";protein serine/threonine kinase activity [GO:0004674]";"ATP binding [GO:0005524]	16	16	27.2	80.685	0	50.565	3797600000	109	0.736641	0.33536	0.838197	0.289055	0.0153799	-0.0166664	0.217638	-0.103065	0.285659	-0.181424	0.838197	0.289055	0.626503	0.305721
27.3966	27.3574	27.8051	27.3958	27.0709	27.9284	NaN	NaN	27.4606	28.0865	28.3063	28.3008	28.5871	27.6984	28.6364	27.3461	27.6521	27.5043	27.5717	27.3997	27.3808		Map205	337	+				52	1	54.9	118.15	0.0010187	2.5195	2620300000	21	3.02774	0.0132869	0.0778843	0.0416295	0.177392	0.0500895	2.22389	0.818484	0	0.00984764	0.0778843	0.0416295	0.0145198	-0.00846004
32.1345	32.0212	32.211	32.0834	31.7736	31.8712	31.4934	31.6387	31.5696	32.0479	32.0343	32.1748	31.5054	31.9611	31.725	32.1071	31.7292	31.8917	32.1247	31.8645	31.8478		Sec24AB	338		intracellular protein transport [GO:0006886]";"cargo loading into COPII-coated vesicle [GO:0090110]	Golgi membrane [GO:0000139]";"COPII vesicle coat [GO:0030127]	transporter activity [GO:0005215];zinc ion binding [GO:0008270]";"signal sequence binding [GO:0005048]	36	36	33.7	127.06	0	323.31	46931000000	664	1.26807	0.191193	0.251422	0.0701599	0.0915085	-0.0363261	0.086297	-0.0375776	1.72784	-0.378456	0.251422	0.0701599	0.385566	0.106486
NaN	29.3288	27.814	28.9717	29.1801	27.6995	28.2521	28.3663	26.3077	28.8437	28.5714	28.6017	28.6317	28.909	28.5295	28.9137	27.692	27.2643	28.6741	28.8145	29.4887	Palmitoyltransferase		339		protein palmitoylation [GO:0018345];protein targeting to membrane [GO:0006612]";"peptidyl-L-cysteine S-palmitoylation [GO:0018230];protein palmitoylation [GO:0018345]	Golgi apparatus [GO:0005794];integral component of membrane [GO:0016021];plasma membrane [GO:0005886]";"endoplasmic reticulum [GO:0005783];"integral component of membrane [GO:0016021]	protein-cysteine S-palmitoyltransferase activity [GO:0019706]	9	9	18.2	50.333	0.0001806	6.0583	5196900000	38	0.890303	0.206056	0.336091	-0.393604	0.869242	-1.03578	0.841622	-0.311272	0.881234	-1.35037	0.336091	-0.393604	0.498576	0.642172
33.7757	33.7751	33.7719	33.3278	33.419	33.5494	33.1866	32.8627	32.952	33.6466	33.5001	33.5089	33.2449	33.4314	33.3043	33.1436	32.8436	33.2586	33.4534	33.1342	33.0922	Presequence protease, mitochondrial	CG3107	341	+	proteolysis [GO:0006508]	mitochondrion [GO:0005739]";"mitochondrial matrix [GO:0005759]	metal ion binding [GO:0046872]";metalloendopeptidase activity [GO:0004222]";"hydrolase activity [GO:0016787];"metal ion binding [GO:0046872]	66	66	68.2	119.32	0	323.31	128460000000	1424	2.99725	0.0187429	1.49478	0.37655	0.358122	-0.144667	0.97011	0.212772	0.688713	-0.226171	1.49478	0.37655	2.06285	0.521217
26.7832	25.8129	25.9209	26.6698	27.1533	26.4402	25.9175	24.8454	25.9585	26.1663	26.6549	26.5869	24.9507	26.162	26.6486	27.3801	25.9131	28.0546	NaN	25.9086	25.4743			342		GPI anchor biosynthetic process [GO:0006506]	integral component of membrane [GO:0016021]";"endoplasmic reticulum membrane [GO:0005789]		8	8	27.4	27.038	0.00018015	5.9552	1130500000	38	1.06907	0.150278	0.994776	0.771941	0.731896	1.4245	0.456713	0.503453	0.0818301	-0.117665	0.994776	0.771941	0.607332	-0.65256
29.3284	28.3661	28.2686	28.6587	28.5414	27.8591	29.4143	29.4147	29.3644	28.6649	28.5379	28.4029	28.6383	28.648	28.6154	28.7831	29.3358	27.6383	29.9788	30.2253	29.651			343	+	spermine catabolic process [GO:0046208]		polyamine oxidase activity [GO:0046592]";"oxidoreductase activity [GO:0016491];oxidoreductase activity [GO:0016491]	18	18	40.3	58.043	0	101.14	5842800000	173	3.03737	0.0084234	2.62713	-1.44798	1.21826	-1.36597	4.94927	-1.36714	1.52946	-0.553914	2.62713	-1.44798	0.0670121	-0.0820106
27.1023	27.1101	25.7138	26.4686	27.2534	26.0179	25.6667	26.2634	25.8315	26.8648	26.9101	26.4066	27.3433	27.0304	25.3192	26.9738	27.2982	26.2397	26.5033	25.5925	26.4443	Probable cytochrome P450 6u1	Cyp6u1	344			organelle membrane [GO:0031090]";"endoplasmic reticulum membrane [GO:0005789]	iron ion binding [GO:0005506];monooxygenase activity [GO:0004497];oxidoreductase activity, acting on paired donors, with incorporation or reduction of molecular oxygen [GO:0016705]";"heme binding [GO:0020037]	9	9	27.5	55.508	0	27.852	944020000	32	0.480879	0.435618	0.455235	0.430966	0.697048	0.657177	0.45041	0.465707	0.307662	-0.259503	0.455235	0.430966	0.207379	-0.226211
35.4398	35.3714	35.4531	35.4445	35.0034	35.3383	35.2424	34.8532	35.346	34.8834	34.5655	35.1097	35.0238	35.3492	34.958	35.2129	35.1752	35.3935	35.4758	35.1935	35.3445	DNA replication licensing factor MCM4	dpa	345		DNA replication initiation [GO:0006270];mitotic spindle organization [GO:0007052]";"DNA replication [GO:0006260];DNA replication initiation [GO:0006270]	nucleus [GO:0005634]";"MCM complex [GO:0042555]	DNA binding [GO:0003677];DNA helicase activity [GO:0003678]";"ATP binding [GO:0005524]	74	74	85.7	96.609	0	323.31	458330000000	2677	1.21693	0.194265	0.0111956	0.00382932	0.296765	-0.0774053	1.17813	-0.356327	0.48603	-0.190726	0.0111956	0.00382932	0.308716	0.0812346
33.2296	32.8666	33.1819	33.2185	32.9677	32.9058	33.4977	33.6732	33.4628	33.3074	33.0863	32.9428	32.6746	32.8794	32.7449	32.7482	32.7026	32.3455	33.5205	33.1932	33.0692	Zinc finger CCCH domain-containing protein 15 homolog	CG8635	346	+	cytoplasmic translation [GO:0002181]	cytosol [GO:0005829]	metal ion binding [GO:0046872]	34	34	67.1	45.291	0	323.31	98904000000	576	3.45824	0.00885637	0.751025	-0.199249	1.6326	-0.662191	1.04157	-0.321695	0.88365	0.283649	0.751025	-0.199249	2.03986	0.462942
30.8842	30.6747	31.0551	30.7866	30.319	30.7618	30.3428	30.2726	30.547	30.0839	30.4742	30.7123	30.492	31.0987	30.6844	30.6431	30.7923	30.7417	30.7186	30.4375	30.7241		coil	347		Cajal body organization [GO:0030576]	chromosome, centromeric region [GO:0000775];cytoplasm [GO:0005737];histone locus body [GO:0035363];nuclear body [GO:0016604];nucleoplasm [GO:0005654];spindle [GO:0005819]";"Cajal body [GO:0015030]		32	32	44.9	70.458	0	323.31	19370000000	386	0.464583	0.533155	0.321871	0.120191	0.401795	0.0989399	0.0608966	-0.0358264	0.889097	-0.23925	0.321871	0.120191	0.0499275	0.021251
29.8389	NaN	NaN	27.5553	30.1001	26.6126	26.364	28.3142	23.2157	NaN	26.28	26.3361	30.1	26.2682	23.4206	24.27	23.1552	28.6109	NaN	NaN	NaN	Probable cytochrome P450 6a14	Cyp6a14	348			organelle membrane [GO:0031090]";"endoplasmic reticulum membrane [GO:0005789]	iron ion binding [GO:0005506];monooxygenase activity [GO:0004497];oxidoreductase activity, acting on paired donors, with incorporation or reduction of molecular oxygen [GO:0016705]";"heme binding [GO:0020037]	3	3	5.9	58.232	0.0018525	2.251	1791500000	11	0.46626	0.402828	0	NaN	0	NaN	0	NaN	0	NaN	0	NaN	0.906641	3.18136
29.2612	28.5005	28.8094	29.0059	28.4567	25.796	26.7217	27.4367	25.9943	27.7969	27.1196	27.5738	26.5871	26.6488	27.7471	27.8383	28.2364	24.4458	28.8875	28.3265	28.5205		fra	349		axon midline choice point recognition [GO:0016199];compound eye development [GO:0048749];dendrite guidance [GO:0070983];dendrite morphogenesis [GO:0048813];glial cell migration [GO:0008347];motor neuron axon guidance [GO:0008045];peripheral nervous system neuron axonogenesis [GO:0048936];positive regulation of cell migration [GO:0030335];regulation of axonogenesis [GO:0050770];regulation of dendr…	axonal growth cone [GO:0044295];dendrite [GO:0030425];integral component of membrane [GO:0016021];neuronal cell body [GO:0043025];perivitelline space [GO:0098595];plasma membrane [GO:0005886]";"axon [GO:0030424]	protein domain specific binding [GO:0019904]";"netrin receptor activity [GO:0005042];netrin receptor activity [GO:0005042]	25	25	22.1	167.66	0	64.985	3626600000	91	0.940577	0.174414	0.135903	-0.273195	0.646889	-1.73798	2.23143	-1.33258	1.84795	-1.8606	0.135903	-0.273195	0.654246	1.46479
31.6017	32.0663	31.9941	31.2517	31.5923	31.491	30.7954	31.0664	31.0046	31.3898	31.3148	31.2488	31.4616	31.4414	31.383	31.2069	31.3735	31.2632	31.4526	31.4107	31.296	PAB-dependent poly(A)-specific ribonuclease subunit PAN2	PAN2	350	+	nuclear-transcribed mRNA poly(A) tail shortening [GO:0000289];positive regulation of cytoplasmic mRNA processing body assembly [GO:0010606]";"mRNA processing [GO:0006397]	PAN complex [GO:0031251];P-body [GO:0000932]";"nucleus [GO:0005634]	nucleic acid binding [GO:0003676];poly(A)-specific ribonuclease activity [GO:0004535]";"metal ion binding [GO:0046872]	47	47	40.3	138.88	0	323.31	32272000000	677	2.82558	0.0222899	0.74564	0.279744	0.710131	-0.105261	0.0851192	-0.0132208	1.98703	-0.430942	0.74564	0.279744	1.09902	0.385006
33.8543	33.9626	34.8691	34.3895	34.2828	35.1957	34.3153	34.344	34.9066	34.3622	34.3045	34.4874	34.5853	35.0911	34.6726	34.6439	34.5859	34.944	34.4481	34.6645	35.4397	Nascent polypeptide-associated complex subunit alpha	Nacalpha	351		protein transport [GO:0015031]";"multicellular organism development [GO:0007275]	nascent polypeptide-associated complex [GO:0005854]		16	16	68.7	23.021	0	323.31	319400000000	822	0.206048	0.723048	0.543817	-0.425137	0.14624	-0.126207	0.470544	-0.266972	0.387763	-0.328828	0.543817	-0.425137	0.420068	-0.29893
30.227	29.9902	29.659	29.9074	29.7097	29.3495	29.7559	30.5107	29.8793	30.5543	29.987	29.9939	31.0696	30.1151	30.1424	30.7403	30.6587	29.7723	30.1609	30.6002	29.0728	Nucleolar GTP-binding protein 1;Probable nucleolar GTP-binding protein 1	Non1;CG8801	352		mitotic spindle assembly [GO:0090307];ribosome biogenesis [GO:0042254]";"cell division [GO:0051301];ribosome biogenesis [GO:0042254]	nucleolus [GO:0005730]	GTP binding [GO:0005525]	36	36	47.2	75.351	0	101.04	12605000000	225	0.489636	0.447779	0.151977	-0.137478	0.334553	0.445829	0.419019	0.365767	0.0713509	0.104043	0.151977	-0.137478	1.15909	-0.583307
33.1494	32.7437	32.9311	32.709	32.4648	32.9428	32.7135	32.8802	33.1146	33.0975	32.5777	33.0799	32.6819	33.4356	33.1837	32.8546	32.4367	32.6612	32.826	32.3536	32.6171	Eukaryotic translation initiation factor 3 subunit J	Adam	354		regulation of translational initiation [GO:0006446];translational initiation [GO:0006413]";"formation of cytoplasmic translation initiation complex [GO:0001732];formation of cytoplasmic translation initiation complex [GO:0001732]	eukaryotic 48S preinitiation complex [GO:0033290];eukaryotic translation initiation factor 3 complex [GO:0005852]";"eukaryotic 43S preinitiation complex [GO:0016282]	translation initiation factor activity [GO:0003743]	21	21	70.8	26.567	0	323.31	100460000000	571	0.713368	0.365091	0.654351	0.224562	0.102351	0.0519104	1.02525	0.41046	0.780555	0.303846	0.654351	0.224562	0.492044	0.172651
31.376	31.1125	31.1457	31.0576	31.1153	30.9027	26.8286	25.6562	23.8832	30.5294	30.3717	30.5574	30.6701	30.2949	30.7405	30.6843	30.716	30.2318	31.8791	31.1646	31.5565	Probable cytochrome P450 12d1 proximal, mitochondrial	Cyp12d1-p	355	+	response to insecticide [GO:0017085]";"response to DDT [GO:0046680]	mitochondrial membrane [GO:0031966]	iron ion binding [GO:0005506];monooxygenase activity [GO:0004497];oxidoreductase activity, acting on paired donors, with incorporation or reduction of molecular oxygen [GO:0016705]";"heme binding [GO:0020037]	39	4	76.2	60.21	0	323.31	20952000000	477	8.82165	0	1.41384	-0.415103	1.72595	-0.989372	3.24193	-1.00606	2.63588	-6.07742	1.41384	-0.415103	2.38388	0.574268
25.2057	24.8677	25.6257	25.4228	23.8514	25.3719	NaN	25.9941	24.8774	24.7112	24.1899	24.2899	NaN	24.8172	24.6098	25.0982	26.147	26.187	24.8805	25.199	24.8797		Mppe	356		GPI anchor biosynthetic process [GO:0006506];protein dephosphorylation [GO:0006470]";"ER to Golgi vesicle-mediated transport [GO:0006888];"GPI anchor biosynthetic process [GO:0006506]	Golgi apparatus [GO:0005794];integral component of membrane [GO:0016021]";"endoplasmic reticulum [GO:0005783];"Golgi apparatus [GO:0005794]	phosphatase activity [GO:0016791]	6	6	25.4	41.629	0	20.069	404200000	19	1.31366	0.10479	0.0651695	0.0711263	1.04098	0.824338	1.3779	-0.462811	0.419485	0.449354	0.0651695	0.0711263	0.860756	-0.753211
23.6831	NaN	24.1137	NaN	25.784	24.0315	25.3943	26.6313	NaN	29.1293	28.6987	28.2972	27.8587	25.9798	26.7074	NaN	25.3832	24.4361	NaN	24.0078	25.8643	Probable cytochrome P450 6a17	Cyp6a17	357	+	response to DDT [GO:0046680]";"response to caffeine [GO:0031000];thermosensory behavior [GO:0040040]	organelle membrane [GO:0031090]";"endoplasmic reticulum membrane [GO:0005789]	iron ion binding [GO:0005506];monooxygenase activity [GO:0004497];oxidoreductase activity, acting on paired donors, with incorporation or reduction of molecular oxygen [GO:0016705]";"heme binding [GO:0020037]	17	13	33.1	58.208	0	52.823	1398400000	40	2.37503	0.0151086	0.230863	-0.532946	0.00783592	-0.0263557	1.52587	2.84246	0.36029	1.07677	0.230863	-0.532946	0.265632	-0.50659
34.605	34.7096	34.5892	34.5183	34.5832	35.1371	34.7603	34.9084	35.2639	34.9047	34.5478	34.9002	34.6444	35.2335	34.7758	34.8829	34.0069	34.8699	35.5756	35.0606	35.4189	Calmodulin	Cam	358		adaptation of rhodopsin mediated signaling [GO:0016062];calcium-mediated signaling [GO:0019722];cellular response to ethanol [GO:0071361];centriole replication [GO:0007099];deactivation of rhodopsin mediated signaling [GO:0016059];kinetochore organization [GO:0051383];metarhodopsin inactivation [GO:0016060];muscle cell cellular homeostasis [GO:0046716];photoreceptor cell axon guidance [GO:0072499…	centriole [GO:0005814];centrosome [GO:0005813];cytoplasm [GO:0005737];cytosol [GO:0005829];midbody [GO:0030496];mitotic spindle [GO:0072686];mitotic spindle pole [GO:0097431];myosin V complex [GO:0031475];myosin VI complex [GO:0031476];nucleoplasm [GO:0005654];nucleus [GO:0005634];rhabdomere [GO:0016028];spindle [GO:0005819]";"cell cortex [GO:0005938]	enzyme regulator activity [GO:0030234];myosin heavy chain binding [GO:0032036];myosin V binding [GO:0031489];myosin VI head/neck binding [GO:0070855]";"calcium ion binding [GO:0005509];calcium ion binding [GO:0005509]	15	15	89.3	16.81	0	323.31	414710000000	1362	1.51605	0.102025	2.24165	-0.661313	1.09853	-0.765144	1.67144	-0.517322	0.811204	-0.374173	2.24165	-0.661313	0.174012	0.103832
25.9893	27.7922	27.4457	25.7913	26.9822	26.1941	27.5547	28.2459	27.3815	27.0131	27.4731	25.9214	26.5156	NaN	NaN	25.7095	27.3349	26.2523	26.9235	27.4435	26.294	Protein LTV1 homolog	CG7686	359		positive regulation of cell size [GO:0045793];ribosomal small subunit biogenesis [GO:0042274];ribosomal small subunit export from nucleus [GO:0000056];rRNA processing [GO:0006364]";"DNA endoreduplication [GO:0042023]	EGO complex [GO:0034448];late endosome membrane [GO:0031902];nucleus [GO:0005634];preribosome, small subunit precursor [GO:0030688]";"cytosolic small ribosomal subunit [GO:0022627]		11	11	24.7	57.223	0	34.992	1262400000	54	0.58034	0.354958	0.131961	-0.187897	0.320381	-0.454782	0.119674	-0.156237	0.925146	0.840387	0.131961	-0.187897	0.179237	0.266886
28.539	28.8408	28.5202	27.6374	28.4967	27.904	27.9326	27.7558	28.2931	28.487	28.0386	28.9763	28.5149	28.4932	28.6635	27.087	27.1654	28.5812	27.8572	28.6756	28.5258	Beta-hexosaminidase;Probable beta-hexosaminidase fdl	fdl	360		carbohydrate metabolic process [GO:0005975];N-glycan processing [GO:0006491];protein deglycosylation [GO:0006517];rhodopsin biosynthetic process [GO:0016063]";"brain development [GO:0007420];carbohydrate metabolic process [GO:0005975]	plasma membrane [GO:0005886]";"late endosome [GO:0005770];integral component of membrane [GO:0016021]	beta-N-acetylhexosaminidase activity [GO:0004563];N-acetyl-beta-D-galactosaminidase activity [GO:0102148]";"beta-N-acetylglucosaminidase activity [GO:0016231];"beta-N-acetylhexosaminidase activity [GO:0004563]	14	14	23	75.485	0	47.575	3798900000	104	0.970242	0.199394	0.0326207	-0.0298656	0.608191	-0.7417	0.304485	0.176039	0.532453	-0.359044	0.0326207	-0.0298656	0.878752	0.711834
30.8372	31.2882	31.0765	30.5984	30.2261	31.2185	31.316	30.9136	31.5763	30.3085	30.2385	31.0618	30.9869	30.7274	30.8706	30.5053	30.3465	30.8775	31.7481	31.2748	31.4216	UPF0587 protein CG4646	CG4646	361					9	9	68.7	18.605	0	224.55	24598000000	195	1.74431	0.065678	1.28309	-0.60731	1.89766	-0.905055	1.96187	-0.782508	0.374593	-0.212801	1.28309	-0.60731	0.527482	0.297746
27.2267	28.3157	27.2444	26.4671	27.628	26.3701	25.2575	23.8909	25.1529	25.3487	25.7639	23.8197	25.7865	NaN	25.1524	NaN	23.0459	22.5002	23.6087	NaN	NaN		nemy	362	+	glutamine catabolic process [GO:0006543];glutamine metabolic process [GO:0006541]";"glutamate biosynthetic process [GO:0006537]	mitochondrion [GO:0005739]	glutaminase activity [GO:0004359]	8	8	14.8	72.049	0	23.76	604810000	37	4.34535	0.00106195	0	3.59994	0	-0.835691	0	1.56553	0	1.15835	0	3.59994	3.67497	4.43563
NaN	NaN	NaN	NaN	NaN	NaN	NaN	NaN	NaN	24.3169	24.6174	NaN	NaN	NaN	NaN	23.2331	23.6326	NaN	NaN	NaN	NaN	Transporter	bdg	363		R3/R4 cell fate commitment [GO:0007464]";"neurotransmitter transport [GO:0006836]	integral component of membrane [GO:0016021]	neurotransmitter transporter activity [GO:0005326]";"neurotransmitter:sodium symporter activity [GO:0005328]	2	2	1.7	146.53	0.00085106	2.5854	42709000	3	NaN	NaN	-4.34294e-08	0	0	NaN	0	NaN	-4.34294e-08	0	-4.34294e-08	0	0	NaN
24.0084	25.131	NaN	NaN	NaN	NaN	NaN	NaN	NaN	NaN	NaN	NaN	NaN	NaN	NaN	NaN	25.2694	NaN	23.7661	NaN	NaN		seq	364		branching involved in open tracheal system development [GO:0060446];dendrite morphogenesis [GO:0048813];negative regulation of transcription by RNA polymerase II [GO:0000122];neuron development [GO:0048666];R7 cell development [GO:0045467];R8 cell development [GO:0045463];sensory organ development [GO:0007423];terminal cell fate specification, open tracheal system [GO:0035154];ventral cord develo…	nucleus [GO:0005634]";"nucleoplasm [GO:0005654]	nucleic acid binding [GO:0003676]	2	1	3.7	95.714	0.0096076	1.2751	52893000	6	NaN	NaN	0	0.803638	0	1.50331	0	NaN	0	NaN	0	0.803638	0	-0.699672
34.4971	34.2534	34.7003	34.318	34.0908	34.3665	34.3926	34.1409	34.3855	34.7588	34.2784	34.827	34.1249	34.8576	34.6895	34.2675	34.0918	34.3626	34.4542	34.3298	34.4653		Rpn13	365			nucleus [GO:0005634]";"cytoplasm [GO:0005737]		30	4	72.6	45.555	0	323.31	279950000000	1314	0.664178	0.414353	0.134314	-0.045414	0.907012	-0.17579	0.412974	0.172949	0.517027	-0.1101	0.134314	-0.045414	0.433924	0.130376
34.807	34.6174	35.0757	35.0611	35.0325	34.9633	34.9805	35.0722	35.036	35.1058	34.8326	34.8777	34.8749	34.9921	34.7375	35.0374	34.8643	35.1653	34.8059	34.7952	34.8288	Eukaryotic translation initiation factor 3 subunit M	Tango7	366		cytoplasmic translational initiation [GO:0002183];formation of cytoplasmic translation initiation complex [GO:0001732];Golgi organization [GO:0007030];positive regulation of cysteine-type endopeptidase activity involved in execution phase of apoptosis [GO:2001272];protein secretion [GO:0009306];sperm individualization [GO:0007291];translation [GO:0006412]";"activation of cysteine-type endopeptida…	eukaryotic 43S preinitiation complex [GO:0016282];eukaryotic 48S preinitiation complex [GO:0033290];eukaryotic translation initiation factor 3 complex [GO:0005852];eukaryotic translation initiation factor 3 complex, eIF3m [GO:0071541];Golgi apparatus [GO:0005794];Golgi apparatus [GO:0005794]";investment cone [GO:0070865]";"cytosol [GO:0005829];"eukaryotic 43S preinitiation complex [GO:0016282]	translation initiation factor activity [GO:0003743];translation initiation factor binding [GO:0031369]";"caspase binding [GO:0089720];translation initiation factor activity [GO:0003743]	38	38	94.3	44.086	0	323.31	398130000000	2000	0.54945	0.574427	0.497885	0.116205	1.13777	0.212365	0.576297	0.0934652	2.81876	0.219638	0.497885	0.116205	0.340534	-0.0961603
29.808	29.8444	30.1019	29.375	30.0161	29.3552	29.0641	29.8343	30.1347	29.244	29.8297	29.2741	29.8296	29.746	29.4086	30.1256	30.5447	29.8306	29.605	29.5885	29.0057		cg	367		regulation of transcription, DNA-templated [GO:0006355]";"imaginal disc-derived wing morphogenesis [GO:0007476]	nucleus [GO:0005634]	DNA-binding transcription factor activity [GO:0003700]";"DNA binding [GO:0003677]	23	2	32.3	83.644	0	159.44	9577100000	256	0.912503	0.239479	0.768439	0.350382	1.25933	0.767268	0.316229	0.155615	0.30146	0.27797	0.768439	0.350382	0.932219	-0.416886
35.9277	35.871	36.0049	35.7979	35.5744	35.9142	36.2852	36.2284	36.3849	35.9607	35.7264	36.0095	35.7897	36.1067	36.0575	35.879	35.4826	35.8513	36.1511	35.906	36.1901	Heat shock 70 kDa protein cognate 5	Hsc70-5	368	+	cellular response to heat [GO:0034605];cellular response to unfolded protein [GO:0034620];chaperone cofactor-dependent protein refolding [GO:0051085];mitochondrion morphogenesis [GO:0070584];positive regulation of mitochondrial membrane potential [GO:0010918];protein folding [GO:0006457];protein refolding [GO:0042026];response to unfolded protein [GO:0006986]";"autophagy of mitochondrion [GO:0000…	mitochondrion [GO:0005739]";"cytoplasm [GO:0005737]	ATP binding [GO:0005524];ATPase activity, coupled [GO:0042623];heat shock protein binding [GO:0031072];misfolded protein binding [GO:0051787];protein binding involved in protein folding [GO:0044183];unfolded protein binding [GO:0051082]";"ATPase activity [GO:0016887]	70	69	69	74.065	0	323.31	793400000000	2950	2.53981	0.0407054	1.18539	-0.234013	1.04034	-0.344757	0.632437	-0.140615	1.01917	0.217126	1.18539	-0.234013	0.40097	0.110744
23.6069	25.8998	NaN	NaN	NaN	NaN	26.268	26.3061	NaN	24.8581	25.9452	NaN	NaN	NaN	NaN	NaN	26.0242	25.1983	24.0601	NaN	NaN		ckn	369		axonogenesis [GO:0007409];transmembrane receptor protein tyrosine phosphatase signaling pathway [GO:0007185]";"axon guidance [GO:0007411]	cytoplasm [GO:0005737];focal adhesion [GO:0005925]";"axon [GO:0030424]	signaling adaptor activity [GO:0035591]";"protein phosphatase binding [GO:0019903]	4	4	5.7	90.524	0	10.57	173970000	12	NaN	NaN	0	0.693267	0	1.55115	0	1.34152	0	2.22696	0	0.693267	0.256214	-0.857883
35.017	34.4885	35.0434	35.9092	35.752	35.5836	35.3818	35.2347	35.1148	35.0808	34.967	35.1814	35.4076	35.4997	35.8532	35.7878	35.7375	35.7321	36.0793	35.4443	35.6036	40S ribosomal protein S23	RpS23	370		translation [GO:0006412]";"cytoplasmic translation [GO:0002181];translation [GO:0006412]	cytosolic ribosome [GO:0022626];cytosolic small ribosomal subunit [GO:0022627];polysomal ribosome [GO:0042788];rough endoplasmic reticulum [GO:0005791]";"cytosol [GO:0005829];small ribosomal subunit [GO:0015935]	structural constituent of ribosome [GO:0003735]	18	18	69.9	16.016	0	323.31	554470000000	1607	0.577336	0.405823	0.560832	-0.410129	0.0799904	0.0434278	0.837738	-0.377452	1.06262	-0.465314	0.560832	-0.410129	0.691959	-0.453557
26.9595	26.6186	27.1603	26.816	25.9603	26.1735	26.1696	26.3997	25.7519	27.1095	26.7677	26.4034	25.999	26.3742	26.3907	26.3847	26.1012	25.9335	26.2301	26.2762	26.7376		CG8079-RB	371				nucleic acid binding [GO:0003676]	7	7	20	55.637	0	59.573	925470000	43	0.556102	0.418852	0.281868	0.200085	0.587668	-0.27485	0.140566	0.0927982	0.545075	-0.30755	0.281868	0.200085	0.834284	0.474935
23.4372	NaN	25.8043	24.5174	26.0111	25.3531	23.9514	25.3389	25.951	26.2822	28.3285	27.14	28.1673	27.4482	26.5509	26.3386	25.7833	25.3904	25.4935	25.1172	24.937			372	+		integral component of membrane [GO:0016021]		11	11	20.5	62.822	0	51.79	1013000000	38	2.62251	0.0115294	0.0895504	-0.157955	0.957373	0.65487	2.39746	2.13695	0.0575539	-0.102168	0.0895504	-0.157955	0.576666	-0.812825
29.2945	29.7518	28.8862	28.6634	29.1232	28.559	29.5895	29.7149	29.3784	29.5599	29.6381	29.0844	29.61	30.0593	29.1691	29.6011	29.6648	28.7932	28.9446	29.5717	28.8343		Inr-a	373		termination of RNA polymerase II transcription [GO:0006369]";"mRNA polyadenylation [GO:0006378]	mRNA cleavage factor complex [GO:0005849]";"cytoplasm [GO:0005737]	RNA binding [GO:0003723];RNA polymerase II complex binding [GO:0000993]";"mRNA binding [GO:0003729]	40	40	26.3	200.9	0	177.62	7803600000	243	0.659427	0.352414	0.0845787	-0.0705169	0.259377	0.236146	0.784356	0.403287	0.823895	0.444079	0.0845787	-0.0705169	0.429514	-0.306663
33.8191	33.3088	33.7598	33.5975	33.693	33.7389	33.7042	33.3866	33.7013	33.7353	33.7374	33.9238	33.2415	33.5593	33.4908	33.8014	33.7649	33.9249	33.7404	33.5156	33.5533	S-methyl-5-thioadenosine phosphorylase	Mtap	374		purine ribonucleoside salvage [GO:0006166]";"L-methionine salvage from methylthioadenosine [GO:0019509]	cytosol [GO:0005829];nucleus [GO:0005634]";"cytoplasm [GO:0005737]	S-methyl-5-thioadenosine phosphorylase activity [GO:0017061]";"identical protein binding [GO:0042802];S-methyl-5-thioadenosine phosphorylase activity [GO:0017061]	27	27	92.4	32.017	0	323.31	159730000000	1106	0.29064	0.711966	0.161983	0.049743	1.25888	0.227286	0.0267412	0.0115884	0.0150139	-0.00572205	0.161983	0.049743	0.782477	-0.177543
33.0195	32.8422	32.9666	32.8638	32.6642	32.8198	32.7666	32.9502	33.0219	33.2886	32.9769	33.2129	32.5926	33.0492	32.9583	32.6248	32.3685	32.9526	32.888	33.0734	33.1057		casp	375		negative regulation of biosynthetic process of antibacterial peptides active against Gram-negative bacteria [GO:0002814];negative regulation of peptidoglycan recognition protein signaling pathway [GO:0061060];negative regulation of proteolysis [GO:0045861]";"cell death [GO:0008219]	cytoplasm [GO:0005737]		30	30	50	77.927	0	323.31	92821000000	741	0.890991	0.318394	0.969539	-0.159662	0.960844	-0.373728	0.0207371	-0.00924428	0.464337	-0.109414	0.969539	-0.159662	0.81781	0.214067
33.676	33.8416	33.8237	33.8021	33.9504	33.8588	34.1705	34.1509	34.3005	33.8963	33.9279	33.6011	33.6075	33.8336	33.5062	33.9824	33.9468	34.1746	34.0155	33.7779	33.6713	Chitinase-like protein CG5210	CG5210	376	+	chitin-based cuticle development [GO:0040003];cuticle chitin catabolic process [GO:0006036];ecdysis, chitin-based cuticle [GO:0018990];imaginal disc development [GO:0007444];wound healing [GO:0042060]";"carbohydrate metabolic process [GO:0005975];carbohydrate metabolic process [GO:0005975]	extracellular space [GO:0005615]";"extracellular region [GO:0005576]	chitin binding [GO:0008061];chitin binding [GO:0008061]";imaginal disc growth factor receptor binding [GO:0008084]";"chitinase activity [GO:0004568]	36	35	71.7	50.354	0	323.31	168840000000	1040	2.82824	0.0327887	0.0153259	0.00384394	0.794137	0.213029	0.31489	-0.0928332	1.58145	0.385704	0.0153259	0.00384394	1.67599	-0.209185
30.821	30.7247	31.0608	30.5143	30.4459	30.4806	30.1142	30.419	30.2091	30.7521	30.7839	30.6493	30.3406	30.8409	30.3629	30.5288	30.6	30.8555	30.5806	30.5447	30.4504	Transmembrane protein 131 homolog	CG8370	377			integral component of membrane [GO:0016021]";"endomembrane system [GO:0012505]		52	52	38.6	173.32	0	323.31	17838000000	378	1.13816	0.222251	0.468498	0.149307	0.568425	0.136199	0.308292	0.0963875	1.32602	-0.277793	0.468498	0.149307	0.0287027	0.0131079
24.4705	26.0481	NaN	NaN	NaN	NaN	24.512	NaN	NaN	23.7566	25.1687	24.7684	NaN	25.4233	NaN	25.3096	NaN	24.6509	NaN	NaN	NaN		CG4853-RA	378		positive regulation of Ras protein signal transduction [GO:0046579];small GTPase mediated signal transduction [GO:0007264]";"mushroom body development [GO:0016319]	intracellular [GO:0005622]	Ras guanyl-nucleotide exchange factor activity [GO:0005088]	6	6	9.8	78.448	0.0060925	1.5576	148780000	10	0.104255	0.827394	0	NaN	0	NaN	0	NaN	0	NaN	0	NaN	0.110669	0.279071
35.1333	34.6085	35.0843	35.5833	35.1582	35.2609	35.3668	35.2031	35.2607	35.2363	35.2992	35.244	35.1973	35.1971	35.2459	35.0264	34.9548	35.3382	35.6958	35.2032	35.2258	Eukaryotic translation initiation factor 3 subunit C	eIF3-S8	379		translational initiation [GO:0006413]";"formation of cytoplasmic translation initiation complex [GO:0001732];formation of cytoplasmic translation initiation complex [GO:0001732]	eukaryotic 43S preinitiation complex [GO:0016282];eukaryotic 48S preinitiation complex [GO:0033290];eukaryotic translation initiation factor 3 complex [GO:0005852]";"cytosol [GO:0005829];"eukaryotic 43S preinitiation complex [GO:0016282]	translation initiation factor binding [GO:0031369]";"translation initiation factor activity [GO:0003743]	64	64	56.7	105.65	0	323.31	525070000000	2787	0.291966	0.690532	0.510474	-0.23684	0.604115	-0.268443	0.621282	-0.138325	0.229267	-0.0980593	0.510474	-0.23684	0.0550128	0.0316029
36.1967	35.9398	36.3487	35.9461	35.45	36.299	36.2912	36.229	36.3089	36.4354	36.3307	36.6564	35.9007	36.7509	36.364	35.8529	36.1088	36.1185	36.9073	36.3308	36.54	Probable elongation factor 1-beta	Ef1beta	380		translational elongation [GO:0006414]	eukaryotic translation elongation factor 1 complex [GO:0005853]	translation elongation factor activity [GO:0003746]	26	26	85.1	24.247	0	323.31	1042500000000	2290	1.33675	0.13817	1.37134	-0.562692	1.39209	-0.565996	0.394092	-0.186403	0.864323	-0.316353	1.37134	-0.562692	0.00537482	0.00330353
NaN	NaN	NaN	NaN	NaN	NaN	23.8389	25.0786	25.7393	NaN	NaN	NaN	NaN	24.7052	24.6989	23.9604	25.6772	NaN	NaN	25.7509	25.3973	Gamma-secretase subunit pen-2	pen-2	381		Notch signaling pathway [GO:0007219]";"Notch receptor processing [GO:0007220]	integral component of membrane [GO:0016021];late endosome [GO:0005770];recycling endosome [GO:0055037]";"gamma-secretase complex [GO:0070765];integral component of membrane [GO:0016021]		1	1	9.9	11.725	0.0018503	2.2316	301840000	10	0.141511	0.767174	0	NaN	0.319097	-0.7553	1.41172	-0.872082	0.381121	-0.688488	0	NaN	0	NaN
31.674	31.2408	32.117	31.3736	31.171	32.1702	31.7162	29.6005	31.7906	29.5429	30.5294	31.4788	32.3346	31.8571	31.8849	30.4281	30.0093	30.46	30.7351	30.612	32.3634	Ubiquitin-fold modifier 1	CG34191	382		protein K69-linked ufmylation [GO:1990592];response to endoplasmic reticulum stress [GO:0034976]";"neuromuscular process [GO:0050905]	nucleus [GO:0005634]";"cytoplasm [GO:0005737]		5	5	71.3	9.4378	0	307.88	34836000000	132	0.486828	0.413862	0.376414	0.387578	0.737749	-0.937679	0.0161993	0.0344505	0.0775276	-0.201077	0.376414	0.387578	2.68629	1.32526
NaN	24.9768	NaN	23.9589	25.6484	25.2834	NaN	24.2015	23.6354	24.5693	24.246	NaN	24.703	NaN	23.9088	26.7618	24.751	NaN	24.6027	24.8205	NaN	Probable Ufm1-specific protease 1	UFSP1	383				UFM1 hydrolase activity [GO:0071567]";"thiolester hydrolase activity [GO:0016790];UFM1 hydrolase activity [GO:0071567]	5	5	29.9	25.791	0.00018312	7.2409	227120000	11	0.850776	0.21005	0.176632	0.255289	0.3871	1.04479	0.575694	-0.354825	0.919499	-0.793127	0.176632	0.255289	0.407661	-0.789502
29.2565	29.2132	29.2053	28.676	28.8492	28.6456	28.3832	29.0916	28.5326	28.3979	28.9944	28.6835	29.0432	28.5767	28.9552	28.7593	28.6745	29.3564	28.8347	28.9116	28.3968	Mitogen-activated protein kinase kinase kinase kinase	hppy	384		apoptotic process [GO:0006915];behavioral response to ethanol [GO:0048149];Golgi organization [GO:0007030];JNK cascade [GO:0007254];negative regulation of epidermal growth factor receptor signaling pathway [GO:0042059];positive regulation of apoptotic process [GO:0043065];positive regulation of cell size [GO:0045793];positive regulation of hippo signaling [GO:0035332];positive regulation of JNK c…	cytosol [GO:0005829]";"cytoplasm [GO:0005737];cytoplasm [GO:0005737]	MAP kinase kinase kinase kinase activity [GO:0008349];protein kinase activity [GO:0004672];protein kinase C activity [GO:0004697];protein serine/threonine kinase activity [GO:0004674]";"ATP binding [GO:0005524]	20	20	25.9	103.64	0	309.97	5254500000	193	0.2653	0.680793	0.631286	0.259925	0.331762	0.215678	0.121273	0.0607754	0.0582967	-0.0452614	0.631286	0.259925	0.0723845	0.0442473
28.5687	28.2988	26.7434	27.9895	27.495	27.0534	27.7425	28.0483	25.8248	28.2656	28.2841	27.8576	27.4196	26.2262	27.3178	26.8643	28.5038	27.8994	27.5171	28.6144	27.7119	Uncharacterized protein CG10915	CG10915	386					15	15	27.1	65.421	0	42.214	2289200000	73	0.0787433	0.869358	0.213546	-0.256314	0.119389	-0.191966	0.323718	-0.385992	0.407335	-0.742587	0.213546	-0.256314	0.042421	-0.0643476
28.5308	28.8084	29.0626	27.3092	28.3625	27.8505	26.9681	26.638	26.5173	28.9105	28.8232	28.0687	28.1397	26.7414	27.9394	25.3518	27.2783	25.1478	26.4221	NaN	26.5792	Cytochrome P450 4e2	Cyp4e2	387	+		endoplasmic reticulum membrane [GO:0005789];organelle membrane [GO:0031090]";"endomembrane system [GO:0012505];"endoplasmic reticulum membrane [GO:0005789]	iron ion binding [GO:0005506];monooxygenase activity [GO:0004497];oxidoreductase activity, acting on paired donors, with incorporation or reduction of molecular oxygen [GO:0016705]";"heme binding [GO:0020037]	13	12	29.8	60.692	0	27.972	2909000000	77	2.98572	0.00703896	2.03519	1.82002	0.252177	-0.574703	1.47566	1.60316	0.467068	0.20713	2.03519	1.82002	2.3244	2.39472
26.4575	26.4628	26.0553	26.0252	25.7508	25.7566	26.6498	24.7705	25.0627	23.9356	25.0743	23.8275	24.0992	26.138	NaN	NaN	NaN	NaN	25.5533	26.219	25.5976	Protein grainyhead	grh	388		chitin-based embryonic cuticle biosynthetic process [GO:0008362];epithelial cell morphogenesis [GO:0003382];fibroblast growth factor receptor signaling pathway [GO:0008543];ganglion mother cell fate determination [GO:0007402];membrane organization [GO:0061024];nervous system development [GO:0007399];open tracheal system development [GO:0007424];positive regulation of transcription by RNA polymera…	nucleus [GO:0005634]	DNA-binding transcription factor activity [GO:0003700];protein homodimerization activity [GO:0042803];sequence-specific DNA binding [GO:0043565]";"DNA binding [GO:0003677]	8	8	9	116.07	0	12.158	475950000	32	1.50004	0.0758561	0.597443	0.294718	0	NaN	0.994148	-1.17507	0.180829	-0.295643	0.597443	0.294718	0	NaN
27.4283	27.5345	27.4972	27.4297	28.5959	26.2349	26.1681	27.6449	26.559	27.0819	27.3238	26.3942	27.391	26.6753	26.5253	25.7251	25.785	24.2363	26.7603	26.4756	25.6779	Protein EFR3 homolog cmp44E	stmA	389	+	chemical synaptic transmission [GO:0007268];mitotic cytokinesis [GO:0000281];phototransduction [GO:0007602];synaptic vesicle endocytosis [GO:0048488];synaptic vesicle exocytosis [GO:0016079]";"bulk synaptic vesicle endocytosis [GO:0150008]	presynapse [GO:0098793];synapse [GO:0045202]";"integral component of membrane [GO:0016021]		16	16	22.6	90.909	0	30.433	1498800000	54	2.39873	0.0182147	1.27323	1.14883	0.812636	-1.05579	0.93772	0.594018	0.371569	0.486094	1.27323	1.14883	2.26262	2.20462
29.3386	29.1621	28.5173	28.8662	28.9993	28.9981	29.0954	28.9579	28.4458	29.2996	29.0358	28.4667	29.136	28.5747	29.1718	29.9306	29.9239	30.1515	29.0709	29.45	28.9416		ana2	390	+	centriole assembly [GO:0098534];centriole replication [GO:0007099];centriole-centriole cohesion [GO:0010457];establishment of mitotic spindle orientation [GO:0000132];microtubule anchoring at centrosome [GO:0034454]";"asymmetric neuroblast division [GO:0055059]	centrosome [GO:0005813]";"centriole [GO:0005814]		16	1	50.6	46.438	0	163.83	6562700000	141	3.10183	0.01005	0.39699	-0.173863	2.12265	0.847864	0.403807	-0.206709	0.572149	-0.321091	0.39699	-0.173863	3.21234	-1.02173
27.5026	26.1109	25.8893	27.0779	25.8527	26.107	27.8943	27.2348	26.6707	27.4737	27.2242	26.7749	25.9269	NaN	26.0279	26.2717	26.1681	26.5709	26.7617	26.4434	25.4784		MESR4	391		cellular response to hypoxia [GO:0071456];germarium-derived oocyte differentiation [GO:0030706];negative regulation of Ras protein signal transduction [GO:0046580];negative regulation of transcription, DNA-templated [GO:0045892];positive regulation of transcription by RNA polymerase II [GO:0045944];positive regulation of transcription, DNA-templated [GO:0045893];regulation of gene expression [GO:…	nucleus [GO:0005634]	metal ion binding [GO:0046872];sequence-specific DNA binding [GO:0043565]";"DNA-binding transcription factor activity [GO:0003700]	14	14	7.2	238.91	0	50.728	1168700000	51	0.521766	0.403012	0.155597	0.195566	0.0965621	0.109081	0.402424	0.457706	0.927682	1.0388	0.155597	0.195566	0.0740052	0.0864849
33.5218	33.3895	33.3074	33.3308	33.2082	33.2847	32.7463	32.8776	32.6465	33.3242	33.3704	33.3275	32.951	32.9553	32.882	32.8655	32.8167	32.9563	32.788	32.8185	32.946		Rme-8	392	+	receptor-mediated endocytosis [GO:0006898]";"positive regulation of border follicle cell migration [GO:1903688]	endosome membrane [GO:0010008]		127	127	58.5	272.47	0	323.31	104850000000	1650	3.76142	0.00842817	3.62405	0.489597	0.171299	0.0286992	1.09151	0.284236	0.496919	-0.0940158	3.62405	0.489597	3.53974	0.460897
29.1448	29.4935	29.7693	29.8169	29.8706	29.4389	29.5748	29.8011	29.6303	29.7958	29.6189	29.821	29.9524	29.7102	29.3138	30.2174	30.0785	29.62	29.8091	29.4443	29.3262	Protein enabled	ena	393		actin filament organization [GO:0007015];axon guidance [GO:0007411];axonogenesis [GO:0007409];border follicle cell migration [GO:0007298];compound eye development [GO:0048749];cytoplasmic transport, nurse cell to oocyte [GO:0007303];cytoskeleton organization [GO:0007010];dendrite morphogenesis [GO:0048813];dorsal closure [GO:0007391];epithelial cell morphogenesis [GO:0003382];filopodium assembly …	axon [GO:0030424];cell leading edge [GO:0031252];cell-cell junction [GO:0005911];cytoskeleton [GO:0005856];cytosol [GO:0005829];dendrite [GO:0030425];filopodium tip [GO:0032433];lamellipodium [GO:0030027];subsynaptic reticulum [GO:0071212]";"adherens junction [GO:0005912]	SH3 domain binding [GO:0017124]";"actin binding [GO:0003779]	20	20	40.4	69.615	0	302.97	10596000000	261	0.622596	0.424323	0.122045	0.062513	0.896477	0.445482	0.500158	0.175519	0.37108	0.142235	0.122045	0.062513	0.983293	-0.382969
31.6293	31.2579	31.7703	31.2961	31.0933	31.1488	31.4474	31.2223	31.7461	30.6686	30.8322	30.8345	30.7214	30.8668	31.14	30.8538	30.8869	30.9772	31.1848	30.9076	30.9764	Serine/threonine-protein kinase N	Pkn	394	+	cell adhesion [GO:0007155];dorsal closure [GO:0007391];intracellular signal transduction [GO:0035556];mitotic cytokinesis [GO:0000281];peptidyl-serine phosphorylation [GO:0018105];positive regulation of wound healing [GO:0090303];protein autophosphorylation [GO:0046777];protein phosphorylation [GO:0006468];regulation of actomyosin contractile ring localization [GO:1901648];wing disc morphogenesis…	cell junction [GO:0030054];cleavage furrow [GO:0032154];cytoplasm [GO:0005737];cytoskeleton [GO:0005856];cytosol [GO:0005829];lamellipodium [GO:0030027];midbody [GO:0030496];nucleus [GO:0005634]";"apical cortex [GO:0045179]	GTP-Rho binding [GO:0017049];protein kinase activity [GO:0004672];protein kinase C activity [GO:0004697];protein kinase C activity [GO:0004697]";protein serine/threonine kinase activity [GO:0004674]";"ATP binding [GO:0005524]	56	56	36.8	163.93	0	323.31	26118000000	602	2.96984	0.016833	1.06634	0.343043	0.570651	-0.116952	0.811729	-0.178982	1.21881	0.449018	1.06634	0.343043	1.57359	0.459995
28.9562	28.6871	27.7533	29.0256	28.1625	27.3118	28.2955	28.0992	27.6606	29.2719	29.2054	28.8861	27.5691	26.9918	26.9329	28.7484	29.1014	28.2569	29.0714	28.6055	28.987		thr	395					26	2	22.8	157.55	0	71.145	3878200000	138	0.265145	0.619888	0.657769	-0.571878	0.260844	-0.185725	0.523278	-0.745074	1.67451	-0.869528	0.657769	-0.571878	0.383787	-0.386153
29.1697	30.1494	30.556	29.5653	30.1702	30.2661	29.9545	29.2689	29.8655	29.8694	30.2743	30.0987	30.1354	29.9866	30.0904	29.8008	29.5795	30.0632	29.6552	29.7191	28.48	Thioredoxin-related transmembrane protein 2 homolog	CG11007	396		cell redox homeostasis [GO:0045454]	integral component of membrane [GO:0016021]";"cell [GO:0005623]		9	9	26.2	31.322	0	21.561	11162000000	129	0.881102	0.238445	0.889768	0.694675	0.549807	0.52971	1.61637	0.791032	0.378276	0.411505	0.889768	0.694675	0.206944	0.164965
25.9684	26.7033	25.9388	25.6978	25.9994	25.393	NaN	23.694	25.3385	26.9809	27.9469	NaN	25.3656	NaN	25.5071	24.9214	26.663	24.9909	25.5787	25.9657	25.4009			397		cellular response to exogenous dsRNA [GO:0071360];defense response to bacterium [GO:0042742];defense response to virus [GO:0051607];innate immune response [GO:0045087];interferon-beta production [GO:0032608];positive regulation of defense response to virus by host [GO:0002230];positive regulation of peptidoglycan recognition protein signaling pathway [GO:0061059];positive regulation of type I int…	integral component of membrane [GO:0016021]";"endoplasmic reticulum membrane [GO:0005789]	cyclic-GMP-AMP binding [GO:0061507]";"cyclic-di-GMP binding [GO:0035438]	9	9	38.5	40.183	0	19.391	640720000	16	0.792726	0.23333	0.495118	0.301645	0.0729182	-0.123351	0.480269	0.801645	0.745454	-1.13218	0.495118	0.301645	0.41949	0.424995
28.3555	27.9482	28.6599	28.6129	28.7169	28.5753	29.0368	29.5422	28.5363	28.8811	28.0901	28.7535	28.1676	28.1725	27.9404	27.873	28.6772	29.2993	28.9578	29.159	28.9568	MIP18 family protein CG30152	CG30152	399		nuclear chromosome segregation [GO:0098813]";"cell division [GO:0051301]	cytoplasm [GO:0005737];spindle microtubule [GO:0005876]";"apical plasma membrane [GO:0016324]		8	8	48.6	23.805	0	153.28	5325200000	88	1.03017	0.18743	1.74916	-0.546447	0.415043	-0.408049	1.66485	-0.690361	0.0154296	0.0138779	1.74916	-0.546447	0.168337	-0.138398
30.314	29.8285	29.8899	29.4873	29.374	29.6751	29.6545	27.3178	29.3265	29.9428	29.6818	30.039	29.2513	29.4684	28.9446	29.0315	29.4346	29.0834	29.9194	29.1929	29.0598	Calpain-A;Calpain-A catalytic subunit	CalpA	400		cuticle development [GO:0042335];defense response to fungus [GO:0050832];determination of adult lifespan [GO:0008340];dorsal/ventral pattern formation [GO:0009953];larval locomotory behavior [GO:0008345];myoblast fusion [GO:0007520];neuron remodeling [GO:0016322];protein autoprocessing [GO:0016540];proteolysis [GO:0006508]";"BMP signaling pathway involved in spinal cord dorsal/ventral patterning …	cytoplasm [GO:0005737];intracellular [GO:0005622];neuronal cell body [GO:0043025]";"actin cytoskeleton [GO:0015629];integral component of membrane [GO:0016021];intracellular [GO:0005622]	calcium ion binding [GO:0005509]";"calcium-dependent cysteine-type endopeptidase activity [GO:0004198];ligand-gated ion channel activity [GO:0015276]	40	33	50.4	93.962	0	323.31	9512400000	254	0.726673	0.288152	0.687584	0.370768	0.282876	-0.20754	0.216558	0.16397	0.330639	-0.624413	0.687584	0.370768	1.49688	0.578307
25.9244	28.8759	29.3676	27.1085	30.3777	29.1005	24.0159	28.6181	29.5449	27.4304	30.5797	28.514	30.7192	28.542	29.9981	NaN	30.2564	27.8921	27.5904	29.8211	29.4552	High mobility group protein Z	HmgZ	401		regulation of transcription by RNA polymerase II [GO:0006357]";"chromatin remodeling [GO:0006338]	nuclear chromatin [GO:0000790];nucleus [GO:0005634]	transcription factor binding [GO:0008134]";"DNA binding, bending [GO:0008301];DNA binding [GO:0003677]	5	4	31.5	12.656	0.00018188	6.6512	7200600000	37	0.204967	0.665434	0.181475	-0.496461	0.0312772	0.118734	0.142957	0.341692	0.352164	-1.56261	0.181475	-0.496461	0.179088	-0.615195
27.9516	28.1296	27.6505	27.8348	27.9396	27.7969	28.0945	28.4975	27.607	27.8669	28.1302	27.324	28.0486	27.0834	27.5514	27.0127	28.1631	28.5942	27.5758	28.6321	27.7327	Shugoshin	mei-S332	402		female meiotic nuclear division [GO:0007143];male meiosis sister chromatid cohesion [GO:0007065];male meiotic nuclear division [GO:0007140];meiotic chromosome segregation [GO:0045132];multicellular organism development [GO:0007275];sister chromatid cohesion [GO:0007062]";"cell division [GO:0051301];meiotic chromosome segregation [GO:0045132]	chromosome, centromeric region [GO:0000775];condensed nuclear chromosome, centromeric region [GO:0000780];nucleus [GO:0005634]";pericentric heterochromatin [GO:0005721]";"chromosome [GO:0005694];"chromosome, centromeric region [GO:0000775]		13	13	36.9	44.401	0	52.967	2852500000	96	0.125489	0.819235	0.157566	-0.0963599	0.0333907	-0.056893	0.426776	-0.312792	0.0722527	0.086139	0.157566	-0.0963599	0.0426501	-0.0394669
35.4804	35.5943	35.7645	36.403	36.2464	36.2026	35.9815	36.0547	35.7706	35.795	35.6982	35.6134	36.0552	35.8574	35.9904	35.7044	36.0134	35.8889	36.5381	36.5958	36.4524	40S ribosomal protein S16	RpS16	403		maturation of SSU-rRNA from tricistronic rRNA transcript (SSU-rRNA, 5.8S rRNA, LSU-rRNA) [GO:0000462]";"cytoplasmic translation [GO:0002181];translation [GO:0006412]	cytosolic small ribosomal subunit [GO:0022627]";"cytosolic ribosome [GO:0022626];ribosome [GO:0005840]	structural constituent of ribosome [GO:0003735]";"RNA binding [GO:0003723];structural constituent of ribosome [GO:0003735]	32	32	84.5	16.774	0	268.41	781580000000	1423	1.8571	0.0683159	1.39309	-0.580254	2.58041	-0.659899	3.53156	-0.69387	2.47794	-0.593198	1.39309	-0.580254	0.126843	0.0796458
27.575	NaN	28.5709	27.3943	27.7849	27.8364	27.7593	28.2869	NaN	27.6634	26.6782	28.2015	26.1134	27.979	28.0714	27.5431	26.893	NaN	27.3827	27.3639	28.2238	Syndecan	Sdc	404		detection of light stimulus involved in visual perception [GO:0050908];epithelial cell migration, open tracheal system [GO:0007427];glial cell development [GO:0021782];motor neuron axon guidance [GO:0008045];muscle organ development [GO:0007517];positive regulation of gene silencing by miRNA [GO:2000637];positive regulation of synaptic growth at neuromuscular junction [GO:0045887]";"axon guidance…	integral component of membrane [GO:0016021];neuromuscular junction [GO:0031594];perivitelline space [GO:0098595];plasma membrane [GO:0005886];synapse [GO:0045202]";"cell surface [GO:0009986];integral component of membrane [GO:0016021]		4	4	24.4	28.238	0	121.36	2128900000	28	0.192649	0.70744	0.205819	0.175519	0.407566	-0.438735	0.144741	-0.205623	0.353655	0.366297	0.205819	0.175519	0.783765	0.614254
31.5397	31.8477	30.8686	31.9782	32.2602	31.5008	31.6751	31.7013	30.8544	31.3566	31.7813	31.3169	31.3179	31.5318	31.2991	32.3501	31.9976	32.0051	32.3104	31.9813	31.6324		l(2)k09913	405			integral component of membrane [GO:0016021]		16	16	42.8	44.115	0	323.31	41943000000	442	1.15462	0.159865	0.443548	-0.308805	0.248539	0.142923	1.79426	-0.540753	0.763696	-0.5644	0.443548	-0.308805	0.76097	-0.451728
28.1668	28.8743	28.1166	29.0232	29.8075	28.7458	28.3053	29.6461	27.9547	29.1871	28.2498	28.9525	28.0154	27.9455	28.7145	28.8887	29.8156	29.087	28.8782	29.4526	28.9223	Transmembrane protein 14 homolog	CG5532	406			integral component of membrane [GO:0016021]		5	5	50.9	11.582	0.00018302	7.1844	6385700000	69	0.390253	0.512823	0.323187	-0.295357	0.205787	0.179365	0.898014	-0.573567	0.339005	-0.449057	0.323187	-0.295357	0.536379	-0.474722
28.0886	27.5449	27.6935	27.2607	27.739	26.1699	28.0878	27.2332	27.5006	28.2628	29.2024	26.7814	28.329	28.7905	28.2572	26.697	27.2799	27.3192	28.3996	27.8761	28.3677			407		mRNA splicing, via spliceosome [GO:0000398]	U12 snRNP [GO:0005693];U12-type spliceosomal complex [GO:0005689]";"U11/U12 snRNP [GO:0034693]	mRNA binding [GO:0003729];nucleic acid binding [GO:0003676];single-stranded DNA 3'-5' exodeoxyribonuclease activity [GO:0008310]";"3'-5'-exoribonuclease activity [GO:0000175]	9	9	32.9	45.388	0	175.44	2674100000	45	1.15675	0.133634	1.02169	-0.798386	1.87793	-1.11576	0.0389467	0.0560862	0.93399	-0.607313	1.02169	-0.798386	0.323723	0.317375
26.6806	24.5094	25.8099	24.7631	NaN	NaN	25.7877	NaN	25.6861	25.8035	25.7461	NaN	27.1111	NaN	24.322	NaN	24.8936	25.1415	24.853	26.4819	24.3673	Protein 60A	gbb	408		cell development [GO:0048468];dorsal closure [GO:0007391];female germ-line stem cell population maintenance [GO:0036099];imaginal disc-derived wing vein morphogenesis [GO:0008586];imaginal disc-derived wing vein specification [GO:0007474];neuromuscular junction development [GO:0007528];neuromuscular synaptic transmission [GO:0007274];ovarian follicle cell development [GO:0030707];positive regulat…	endomembrane system [GO:0012505];extracellular region [GO:0005576];extracellular space [GO:0005615];type III terminal bouton [GO:0097467]";"dense core granule [GO:0031045];extracellular region [GO:0005576]	cytokine activity [GO:0005125];growth factor activity [GO:0008083];transforming growth factor beta receptor binding [GO:0005160]";"BMP receptor binding [GO:0070700];growth factor activity [GO:0008083]	8	8	22.2	51.687	0	10.643	545080000	25	0.0512883	0.907771	0.0937317	0.206688	0.0908498	-0.216517	0.238011	0.511595	0.23221	0.502869	0.0937317	0.206688	0.218612	0.423206
30.0657	30.2055	29.9932	29.9119	29.8029	29.9023	29.4332	29.1374	28.8272	29.1494	29.1164	29.0331	28.4308	28.187	28.1044	29.4311	29.841	27.0428	29.3423	29.6739	28.7271		Gp150	409		transmembrane receptor protein tyrosine phosphatase signaling pathway [GO:0007185]";"compound eye development [GO:0048749]	plasma membrane [GO:0005886]";"integral component of membrane [GO:0016021]		30	30	31.7	117.36	0	176.4	7809600000	226	1.56748	0.0678538	2.09062	0.732452	0.200351	-0.476156	0.870854	-0.577605	0.128914	-0.115169	2.09062	0.732452	1.12713	1.20861
36.2793	36.1581	36.4769	36.5267	36.3315	36.5137	36.2603	36.3048	36.5641	36.5757	36.5829	36.8919	36.6536	36.9033	36.9534	36.6312	36.3645	36.6287	36.476	36.504	36.6232	Tripeptidyl-peptidase 2	TppII	410		proteolysis [GO:0006508]";"protein homooligomerization [GO:0051260]	mitochondrion [GO:0005739]";"cytoplasm [GO:0005737]	exopeptidase activity [GO:0008238];identical protein binding [GO:0042802];serine-type endopeptidase activity [GO:0004252];tripeptidyl-peptidase activity [GO:0008240]";"aminopeptidase activity [GO:0004177];"serine-type endopeptidase activity [GO:0004252];serine-type endopeptidase activity [GO:0004252]	124	124	80.9	148.91	0	323.31	1233200000000	4519	2.27455	0.0594523	0.837531	-0.153377	0.023728	0.00705083	1.12131	0.225726	0.684882	-0.157991	0.837531	-0.153377	0.759115	-0.160428
NaN	NaN	NaN	NaN	NaN	NaN	NaN	NaN	NaN	29.3218	28.4985	28.4619	28.5416	28.2742	28.3269	27.1327	28.3626	25.8828	24.4194	25.7828	23.9092	Protein twist	twi	411	+	dorsal/ventral axis specification [GO:0009950];ectoderm and mesoderm interaction [GO:0007499];gastrulation [GO:0007369];gastrulation involving germ band extension [GO:0010004];heart development [GO:0007507];Malpighian tubule morphogenesis [GO:0007443];mesoderm development [GO:0007498];mesodermal cell fate commitment [GO:0001710];mesodermal cell fate determination [GO:0007500];mesodermal cell fate…	nucleus [GO:0005634]";"cytoplasm [GO:0005737]	protein heterodimerization activity [GO:0046982];protein homodimerization activity [GO:0042803];transcription factor activity, RNA polymerase II distal enhancer sequence-specific binding [GO:0003705]";"DNA binding [GO:0003677];protein dimerization activity [GO:0046983]	7	7	13.1	54.421	0	81.341	2489600000	42	3.58908	0.00305641	0	NaN	1.2517	2.42222	4.35842	3.86699	0	NaN	0	NaN	0	NaN
27.0256	26.7048	27.8386	27.3139	27.2575	28.0492	26.9106	27.4122	27.7283	27.6895	27.7347	27.3163	25.7199	26.1855	25.5266	25.9728	28.7224	26.4849	27.3659	28.0269	25.6366	Ceramide phosphoethanolamine synthase	CG4585	412		sphingolipid metabolic process [GO:0006665]	integral component of membrane [GO:0016021];plasma membrane [GO:0005886]";"Golgi membrane [GO:0000139];integral component of membrane [GO:0016021]	transferase activity [GO:0016740]	9	9	29.8	43.857	0	16.248	1908300000	51	0.117491	0.806406	0.265788	0.355131	0.0150619	0.0502332	0.160304	-0.314392	0.171431	0.340549	0.265788	0.355131	0.192111	0.304897
NaN	NaN	NaN	NaN	NaN	NaN	25.8111	25.9629	26.1692	24.5098	25.4828	NaN	26.3058	25.7813	25.7642	NaN	25.3401	25.6616	NaN	NaN	NaN	Immune-induced peptide 18	IM18	413		defense response to other organism [GO:0098542];innate immune response [GO:0045087];response to bacterium [GO:0009617]";"defense response [GO:0006952]	extracellular region [GO:0005576]		1	1	26.8	7.2053	0	43.957	295920000	6	0.293033	0.613006	-4.34294e-08	0	0	NaN	0	NaN	0	NaN	-4.34294e-08	0	0	NaN
33.4923	33.3283	33.6028	33.393	33.2795	33.5034	33.3415	33.221	33.4063	33.3881	33.3565	33.3663	33.4464	33.5108	33.3331	33.6844	33.5078	33.4924	33.6375	33.502	33.3982		Opa1	414		compound eye morphogenesis [GO:0001745];dynamin family protein polymerization involved in mitochondrial fission [GO:0003374];membrane fusion [GO:0061025];mitochondrial fission [GO:0000266];mitochondrial fusion [GO:0008053];mitochondrion morphogenesis [GO:0070584];mitochondrion organization [GO:0007005];negative regulation of endoplasmic reticulum stress-induced intrinsic apoptotic signaling pathw…	membrane [GO:0016020];mitochondrial membrane [GO:0031966];mitochondrion [GO:0005739]";"cytoplasm [GO:0005737]	GTP binding [GO:0005525];microtubule binding [GO:0008017]";"GTPase activity [GO:0003924]	70	70	64.6	111.52	0	323.31	133050000000	1460	1.16301	0.347222	0.415619	-0.0793482	0.203838	0.0489553	0.980471	-0.112368	1.01091	-0.189636	0.415619	-0.0793482	0.781034	-0.128304
30.9188	30.5304	31.3583	30.4995	30.66	30.9048	30.6435	30.6343	31.0873	30.4575	30.6547	30.4413	30.8499	30.8186	30.3141	30.9217	31.4087	30.9321	30.7671	30.9003	31.07	Protein dead ringer	retn	415		axon guidance [GO:0007411];dendrite morphogenesis [GO:0048813];embryonic pattern specification [GO:0009880];gliogenesis [GO:0042063];male courtship behavior [GO:0008049];muscle organ development [GO:0007517];negative regulation of transcription by RNA polymerase II [GO:0000122];oogenesis [GO:0048477];positive regulation of transcription, DNA-templated [GO:0045893];regulation of female receptivity…	nucleus [GO:0005634]	DNA-binding transcription activator activity, RNA polymerase II-specific [GO:0001228];DNA-binding transcription factor activity [GO:0003700];repressing transcription factor binding [GO:0070491];RNA polymerase II regulatory region sequence-specific DNA binding [GO:0000977];transcription regulatory region sequence-specific DNA binding [GO:0000976]";"DNA binding [GO:0003677];DNA binding [GO:0003677]	31	3	31.6	96.524	0	323.31	20962000000	340	0.856136	0.29511	0.199228	-0.100508	0.405659	0.175035	1.23483	-0.323111	0.289428	-0.124081	0.199228	-0.100508	0.60333	-0.275543
27.0963	27.4835	NaN	25.6415	26.8173	26.6294	27.6041	27.1742	25.9476	27.3579	28.1036	26.9533	26.1246	NaN	25.9326	NaN	25.6592	NaN	27.8038	27.0561	24.9418	Sestrin homolog	Sesn	416		cellular response to amino acid stimulus [GO:0071230];cellular response to leucine [GO:0071233];cellular response to leucine starvation [GO:1990253];multicellular organism aging [GO:0010259];negative regulation of cell growth [GO:0030308];negative regulation of TORC1 signaling [GO:1904262];positive regulation of macroautophagy [GO:0016239];regulation of reactive oxygen species metabolic process […	nucleus [GO:0005634]";"cytoplasm [GO:0005737];nucleus [GO:0005634]	oxidoreductase activity, acting on peroxide as acceptor [GO:0016684]";"leucine binding [GO:0070728]	8	8	19.7	52.522	0	28.491	900470000	30	0.0134345	0.977123	0.0630466	0.13303	0	-0.941355	0.134869	0.293835	0.112771	0.308033	0.0630466	0.13303	0	1.07438
27.174	28.2735	27.4996	26.623	27.4972	25.8878	26.8365	26.6836	26.0504	27.9051	27.4264	26.7019	27.7298	27.2051	27.3179	27.2892	27.3302	NaN	27.6801	27.2262	26.7502		Lpt	417		ecdysis, chitin-based cuticle [GO:0018990];ecdysone receptor-mediated signaling pathway [GO:0035076];histone H3-K4 methylation [GO:0051568];imaginal disc-derived wing vein morphogenesis [GO:0008586];imaginal disc-derived wing vein specification [GO:0007474];positive regulation of histone H3-K9 trimethylation [GO:1900114];positive regulation of transcription by RNA polymerase II [GO:0045944]";"cel…	MLL3/4 complex [GO:0044666];polytene chromosome [GO:0005700]";"ecdysone receptor holocomplex [GO:0008230]	histone binding [GO:0042393];histone methyltransferase activity (H3-K4 specific) [GO:0042800];nuclear receptor transcription coactivator activity [GO:0030374];transcription coactivator activity [GO:0003713];zinc ion binding [GO:0008270]";"chromatin binding [GO:0003682]	12	12	8.9	164.03	0	19.997	1782000000	64	0.435318	0.471504	0.0399316	-0.059653	0.0913558	0.0908842	0.211403	0.162189	0.899554	-0.695312	0.0399316	-0.059653	0.0893426	-0.150537
30.4244	30.0869	29.9795	29.9453	29.9163	29.7662	29.4443	29.2346	29.3914	30.1272	30.1182	29.7046	29.8577	29.3056	29.9489	29.8957	30.4661	30.748	30.3063	29.8438	29.8623	Cytochrome P450 6a22	Cyp6a22	418	+		organelle membrane [GO:0031090]";"endoplasmic reticulum membrane [GO:0005789]	iron ion binding [GO:0005506];monooxygenase activity [GO:0004497];oxidoreductase activity, acting on paired donors, with incorporation or reduction of molecular oxygen [GO:0016705]";"heme binding [GO:0020037]	31	31	55.9	57.277	0	196.94	11970000000	303	2.18593	0.0388523	0.0325698	0.0156384	0.553518	0.365802	0.329444	-0.160427	1.77541	-0.647363	0.0325698	0.0156384	0.847412	-0.350164
26.4129	25.1975	NaN	26.3569	26.7567	25.3308	27.0355	27.5662	26.7428	25.4864	26.2429	25.7675	25.7655	NaN	26.5481	25.6447	26.1121	25.1491	25.9639	24.9693	25.7129	Oxysterol-binding protein		419		lipid transport [GO:0006869]	intracellular membrane-bounded organelle [GO:0043231];membrane [GO:0016020]";"cytosol [GO:0005829]	sterol binding [GO:0032934];sterol transporter activity [GO:0015248]";"lipid binding [GO:0008289]	11	10	34.3	52.217	0	20.734	777510000	30	1.67506	0.059491	0.43845	0.462249	0.0745156	0.0865758	0.580155	0.413381	1.82151	1.56611	0.43845	0.462249	0.347405	0.375673
24.6152	25.2171	25.5401	24.0652	24.1036	NaN	24.2665	26.0603	NaN	25.6613	24.3085	24.3854	23.3299	NaN	24.7228	24.7336	25.1227	NaN	24.6846	24.5799	24.5419	G protein alpha s subunit	Galphas	420		adenylate cyclase-modulating G protein-coupled receptor signaling pathway [GO:0007188];behavioral response to cocaine [GO:0048148];chemical synaptic transmission [GO:0007268];G protein-coupled receptor signaling pathway [GO:0007186];imaginal disc-derived wing morphogenesis [GO:0007476];instar larval or pupal development [GO:0002165];learning or memory [GO:0007611];neuromuscular junction developme…	heterotrimeric G-protein complex [GO:0005834];plasma membrane [GO:0005886]";"basement membrane [GO:0005604]	G protein-coupled receptor binding [GO:0001664];GTP binding [GO:0005525];GTP binding [GO:0005525]";GTPase activity [GO:0003924];metal ion binding [GO:0046872]";"G-protein beta/gamma-subunit complex binding [GO:0031683]	7	6	21.5	44.699	0.00018242	6.9121	288290000	14	0.0885263	0.855494	0.098641	0.106152	0.898484	0.326052	0.0872515	-0.120518	0.333356	0.561274	0.098641	0.106152	0.166971	-0.2199
NaN	NaN	31.9109	NaN	NaN	NaN	21.9972	NaN	NaN	22.3686	NaN	30.6407	NaN	26.6207	NaN	NaN	NaN	NaN	NaN	NaN	NaN	Ubiquitin carboxyl-terminal hydrolase	Usp15-31	421		ubiquitin-dependent protein catabolic process [GO:0006511]";"protein deubiquitination [GO:0016579]		thiol-dependent ubiquitin-specific protease activity [GO:0004843]	3	3	3.1	135.46	0.0076898	1.3917	2866400000	5	0	1	0	NaN	-4.34294e-08	0	0	NaN	0	NaN	0	NaN	0	NaN
30.2802	30.7363	30.756	31.1636	30.5814	30.7238	30.4439	30.0921	30.3043	31.1691	31.442	31.4379	30.9376	31.3719	31.1006	30.8596	30.958	30.8722	31.0541	30.3333	30.5156		CG3209-RA	422	+		integral component of membrane [GO:0016021]";"endomembrane system [GO:0012505]	1-acylglycerol-3-phosphate O-acyltransferase activity [GO:0003841]	22	22	56.6	43.551	0	323.31	22786000000	297	3.23542	0.00975959	0.122901	0.0725489	0.528105	0.262245	1.84659	0.608866	0.671688	-0.354219	0.122901	0.0725489	0.512354	-0.189696
NaN	NaN	NaN	24.4182	24.008	NaN	23.3844	23.511	23.7335	NaN	NaN	NaN	NaN	NaN	NaN	NaN	NaN	NaN	NaN	23.6647	NaN	Protein jim lovell	lov	423		larval feeding behavior [GO:0030536];larval walking behavior [GO:0008346];male courtship behavior [GO:0008049];negative gravitaxis [GO:0048060];oogenesis [GO:0048477];regulation of transcription by RNA polymerase II [GO:0006357];ventral midline development [GO:0007418]";"gravitaxis [GO:0042332]	nucleus [GO:0005634]	DNA binding [GO:0003677]	5	5	8.1	112.31	0.00068954	3.1401	230840000	7	1.34653	0.149372	0	0.548392	0	NaN	0	NaN	0	-0.121749	0	0.548392	0	NaN
25.5333	25.6737	25.7176	NaN	NaN	NaN	NaN	NaN	23.9604	27.5737	26.5585	24.7968	24.4817	25.6621	25.5033	NaN	24.8899	23.6766	24.4952	23.9317	NaN	PDZ and LIM domain protein Zasp	Zasp52	424		myofibril assembly [GO:0030239];regulation of cell-matrix adhesion [GO:0001952]";"muscle structure development [GO:0061061]	apical part of cell [GO:0045177];basal part of cell [GO:0045178];basolateral plasma membrane [GO:0016323];cell leading edge [GO:0031252];focal adhesion [GO:0005925];muscle tendon junction [GO:0005927];stress fiber [GO:0001725];Z disc [GO:0030018];zonula adherens [GO:0005915]";"actin cytoskeleton [GO:0015629]	actinin binding [GO:0042805];metal ion binding [GO:0046872];muscle alpha-actinin binding [GO:0051371]";"actin binding [GO:0003779];metal ion binding [GO:0046872]	11	11	7.7	227.47	0	20.404	515940000	25	0.877736	0.196953	2.11871	1.42801	0.0331887	0.069787	0.909258	1.54921	0	-0.253078	2.11871	1.42801	1.22744	1.35823
29.8136	30.4926	29.6325	28.9279	30.1873	29.1678	28.5051	28.7049	28.0555	29.074	30.2068	29.2755	29.8158	29.3113	29.8836	24.6133	29.1928	26.9335	28.8178	29.9877	29.08	Sphingomyelin phosphodiesterase	CG3376-RA	425	+	sphingomyelin catabolic process [GO:0006685]";"ceramide biosynthetic process [GO:0046513];sphingomyelin catabolic process [GO:0006685]	integral component of membrane [GO:0016021];lysosome [GO:0005764]";"extracellular space [GO:0005615];integral component of membrane [GO:0016021]	hydrolase activity, acting on glycosyl bonds [GO:0016798];metal ion binding [GO:0046872];phosphoric diester hydrolase activity [GO:0008081];sphingomyelin phosphodiesterase activity [GO:0004767]";"acid sphingomyelin phosphodiesterase activity [GO:0061750];"hydrolase activity, acting on glycosyl bonds [GO:0016798]	19	19	31.1	81.394	0	323.31	7363400000	181	2.24455	0.0210789	0.434873	0.408463	0.804684	-2.38195	0.376109	0.299324	1.01682	-0.873302	0.434873	0.408463	1.68989	2.79041
30.4088	30.4592	30.3974	29.8213	30.57	30.0536	29.7546	29.8348	29.5663	29.6958	30.0747	30.1841	30.0823	29.7122	29.8549	30.5507	29.5908	29.2881	29.3047	30.0036	29.6728	Putative ferric-chelate reductase 1 homolog	CG8399	426		oxidation-reduction process [GO:0055114]	integral component of membrane [GO:0016021]	ferric-chelate reductase activity [GO:0000293]	19	19	33.8	71.349	0	286.23	11787000000	217	1.11318	0.177334	1.63452	0.624736	0.127242	0.149517	0.756286	0.273669	0.0960268	0.0582447	1.63452	0.624736	0.79686	0.475219
28.9566	28.3461	28.7711	26.9261	27.7189	23.5777	27.8836	28.0907	27.2734	27.2559	30.3348	25.6735	28.5533	27.3349	27.4714	NaN	27.7419	26.8856	27.2944	27.8913	27.2685	Protein unzipped	uzip	427		axon guidance [GO:0007411]";"axonal fasciculation [GO:0007413]	integral component of membrane [GO:0016021]		12	12	30.1	54.307	0	33.143	2512100000	61	0.00542238	0.992208	0.0291824	-0.101972	0.150603	-0.170937	0.113557	0.285912	0.343637	0.264469	0.0291824	-0.101972	0.0154571	0.0689653
26.4569	27.4058	27.0182	25.7954	27.2837	26.658	25.9111	27.1564	26.727	26.6385	26.5334	27.2079	26.3205	27.7011	27.3513	27.3354	27.1503	NaN	26.301	27.766	27.1646	Serum response factor homolog	bs	428		cell differentiation [GO:0030154];imaginal disc-derived wing morphogenesis [GO:0007476];imaginal disc-derived wing vein morphogenesis [GO:0008586];instar larval development [GO:0002168];multicellular organism development [GO:0007275];open tracheal system development [GO:0007424];positive regulation of transcription by RNA polymerase II [GO:0045944];pupal development [GO:0035209];short-term memory…	nucleus [GO:0005634]	protein dimerization activity [GO:0046983];proximal promoter sequence-specific DNA binding [GO:0000987];sequence-specific DNA binding [GO:0043565];transcription factor activity, RNA polymerase II proximal promoter sequence-specific DNA binding [GO:0000982];transcription factor activity, RNA polymerase II proximal promoter sequence-specific DNA binding [GO:0000982]";transcription factor binding [G…	8	8	20.3	47.621	0	81.497	1477300000	59	0.144312	0.779762	0.284714	-0.307543	0.105601	0.165652	0.102837	-0.118411	0.355629	-0.478999	0.284714	-0.307543	0.479316	-0.473195
28.7617	28.521	28.9467	28.6976	29.1539	28.1229	28.3272	28.4102	26.8968	28.3495	29.0373	28.6451	29.4308	28.1676	28.4648	25.6821	27.6559	27.0507	28.3662	28.7998	26.7714		Hcs	429	+	peptidyl-lysine biotinylation [GO:0018054];response to heat [GO:0009408]";"histone biotinylation [GO:0071110]	polytene chromosome [GO:0005700]	biotin-[acetyl-CoA-carboxylase] ligase activity [GO:0004077]	22	22	24.8	115.92	0	81.751	3743600000	102	2.05654	0.0301317	0.801309	0.721508	0.626969	-1.18289	0.707491	0.703371	0.0437428	-0.10107	0.801309	0.721508	2.47542	1.9044
33.858	33.7235	33.8751	33.8651	33.471	33.8345	34.2367	33.9195	34.3511	34.5179	33.5288	34.318	33.7724	34.4378	34.4153	34.1737	33.9122	33.9472	34.1895	33.8335	34.566	Superoxide dismutase;Superoxide dismutase [Mn], mitochondrial	Sod2	430		determination of adult lifespan [GO:0008340];heart morphogenesis [GO:0003007];paracrine signaling [GO:0038001];reactive oxygen species metabolic process [GO:0072593];regulation of autophagy of mitochondrion [GO:1903146];regulation of hemocyte proliferation [GO:0035206];regulation of metabolic process [GO:0019222];removal of superoxide radicals [GO:0019430]";"aging [GO:0007568]	mitochondrion [GO:0005739]";"mitochondrial matrix [GO:0005759]	metal ion binding [GO:0046872];superoxide dismutase activity [GO:0004784]";"antioxidant activity [GO:0016209];"metal ion binding [GO:0046872]	13	13	76	24.659	0	323.31	239790000000	704	0.795655	0.309828	1.41324	-0.425138	0.337389	-0.185294	0.038709	-0.0312888	0.0372497	-0.027223	1.41324	-0.425138	1.20656	-0.239844
30.0996	29.827	30.2135	29.597	29.9753	29.7403	29.6311	29.7574	30.102	29.9822	29.8607	30.0453	29.9867	30.0247	29.7288	30.2816	29.9732	30.0873	29.7424	28.6669	28.9286	Golgi to ER traffic protein 4 homolog	CG9853	431	+	protein insertion into ER membrane [GO:0045048]	BAT3 complex [GO:0071818]		15	15	57.2	38.489	0	323.31	11406000000	201	2.62841	0.0218282	1.7909	0.796138	1.38982	1.00141	2.10787	0.825454	0.951114	0.717543	1.7909	0.796138	0.671165	-0.205275
26.5865	27.8383	NaN	25.6967	NaN	NaN	25.9715	27.3228	NaN	24.8757	25.8024	NaN	26.9827	NaN	NaN	24.7128	27.9936	26.3119	24.9228	27.4058	NaN	Centrosomal and chromosomal factor	corto	432		chromatin silencing [GO:0006342];epithelium development [GO:0060429];imaginal disc-derived wing vein specification [GO:0007474];male courtship behavior, veined wing generated song production [GO:0045433];mitotic chromosome condensation [GO:0007076];regulation of gene expression [GO:0010468]";"cell division [GO:0051301]	cytoplasm [GO:0005737];ESC/E(Z) complex [GO:0035098];nucleus [GO:0005634];polytene chromosome [GO:0005700];PRC1 complex [GO:0035102]";"centrosome [GO:0005813]	DNA binding [GO:0003677];identical protein binding [GO:0042802];protein homodimerization activity [GO:0042803]";"chromatin binding [GO:0003682]	7	7	18	58.771	0	34.7	542320000	28	0.0263885	0.950624	0.1627	0.542862	0.0379745	0.17516	0.0787832	-0.277336	0.116226	0.482842	0.1627	0.542862	0.118198	0.367701
26.2126	27.6949	25.9425	23.6306	26.46	25.3148	26.4612	28.081	23.8212	27.8551	27.1353	26.7626	29.1005	27.4693	28.582	29.8623	30.3087	29.263	26.2509	26.2342	25.607	Alpha-amylase;Alpha-amylase B;Alpha-amylase A	Amy-p;Amy-d	433	+	carbohydrate metabolic process [GO:0005975]	extracellular region [GO:0005576]	alpha-amylase activity (releasing maltohexaose) [GO:0103025];calcium ion binding [GO:0005509]";cation binding [GO:0043169]";"alpha-amylase activity [GO:0004556]	15	15	28.9	53.82	0	148.44	3058400000	84	2.72597	0.00918519	0.0678012	-0.154813	3.28787	3.78062	1.85915	1.78674	0.0240159	0.0904299	0.0678012	-0.154813	2.67316	-3.93543
35.253	35.1904	35.2181	35.1338	34.9563	35.0567	35.165	35.2134	35.2634	34.7374	34.9699	34.8832	34.8751	35.2063	34.9847	34.9355	35.1248	34.994	35.3991	35.2592	35.367	V-type proton ATPase subunit E	Vha26	434	+	ATP hydrolysis coupled proton transport [GO:0015991];liquid clearance, open tracheal system [GO:0035002];terminal branching, open tracheal system [GO:0007430]";"apical protein localization [GO:0045176];ATP hydrolysis coupled proton transport [GO:0015991]	plasma membrane proton-transporting V-type ATPase complex [GO:0033181];vacuolar proton-transporting V-type ATPase, V1 domain [GO:0000221]";"plasma membrane [GO:0005886];proton-transporting two-sector ATPase complex, catalytic domain [GO:0033178]	proton-transporting ATPase activity, rotational mechanism [GO:0046961]	31	31	89.4	26.082	0	323.31	474140000000	1807	2.76844	0.0437665	1.62204	-0.207054	2.00283	-0.323666	2.33653	-0.399027	1.17919	-0.127865	1.62204	-0.207054	0.773304	0.116611
NaN	NaN	NaN	NaN	NaN	25.9663	NaN	25.1062	NaN	NaN	NaN	NaN	NaN	NaN	25.1558	NaN	25.6913	NaN	NaN	24.6183	NaN			435		defense response to bacterium [GO:0042742]			1	1	3.1	49.453	0.0026787	2.0491	151830000	5	0	1	0	1.348	0	1.07302	0	0.53747	0	0.487921	0	1.348	0	0.274981
30.9517	30.3337	30.1912	30.0917	29.9989	29.574	29.1988	29.639	29.6647	30.9728	30.6863	30.403	30.0081	29.938	29.6293	29.9331	29.739	30.2363	30.6189	30.0966	30.1189	ADP-ribosylation factor-like protein 8	Gie	436		response to hypoxia [GO:0001666];sister chromatid segregation [GO:0000819]";"cell division [GO:0051301]	extrinsic component of lysosome membrane [GO:0032419];lysosomal membrane [GO:0005765];lysosome [GO:0005764];midbody [GO:0030496];spindle midzone [GO:0051233];vacuolar membrane [GO:0005774]";"cytoplasm [GO:0005737];intracellular [GO:0005622]	beta-tubulin binding [GO:0048487];GDP binding [GO:0019003];GTP binding [GO:0005525]";"alpha-tubulin binding [GO:0043014];GTP binding [GO:0005525]	8	8	55.4	21.253	0	164.89	15178000000	156	0.901165	0.231592	0.111963	-0.0879205	0.620533	-0.308681	0.00542957	-0.00519053	1.5687	-0.777289	0.111963	-0.0879205	0.330931	0.220761
NaN	NaN	NaN	NaN	24.1179	25.5658	25.0494	25.2997	24.1942	NaN	24.9566	26.1621	NaN	NaN	24.7835	25.3183	25.2558	25.6524	25.4456	24.4354	NaN	Probable RNA methyltransferase CG1239	CG1239	437		snRNA modification [GO:0040031]		RNA methyltransferase activity [GO:0008173];snRNA binding [GO:0017069]";"O-methyltransferase activity [GO:0008171];methyltransferase activity [GO:0008168]	5	5	17	34.724	0.00034861	3.7411	306860000	13	0.114548	0.813694	0.0356239	-0.0986195	0.475125	0.468343	0.20039	0.360198	0.054669	-0.0927439	0.0356239	-0.0986195	0.411444	-0.566962
26.9098	27.131	27.3748	24.8746	24.6703	25.1033	NaN	27.1367	26.7696	27.6875	26.4605	26.4676	25.7407	26.5792	27.109	27.8763	25.5317	25.9341	26.0054	25.3614	26.2111			438		protein folding in endoplasmic reticulum [GO:0034975]	ER membrane protein complex [GO:0072546]";"endomembrane system [GO:0012505]		54	1	71.4	100.03	0.00018021	5.9663	1304400000	23	0.251062	0.623712	0.0710472	0.151369	0.313031	0.588095	1.00276	0.814799	1.25934	1.09391	0.0710472	0.151369	0.195872	-0.436726
32.3461	32.4611	32.0212	31.9758	31.991	31.7588	31.8332	31.708	31.5859	32.1178	32.0354	32.2592	32.2816	32.045	31.3862	31.8637	31.9819	32.0087	32.1614	32.3002	31.7556	Kinesin-like protein;Kinesin-like protein subito	sub	439		female meiosis chromosome segregation [GO:0016321];male meiotic nuclear division [GO:0007140];meiotic spindle midzone assembly [GO:0051257];meiotic spindle organization [GO:0000212];metaphase/anaphase transition of mitotic cell cycle [GO:0007091];microtubule-based movement [GO:0007018];mitotic cell cycle [GO:0000278];mitotic spindle organization [GO:0007052]";"embryonic cleavage [GO:0040016];micr…	kinesin complex [GO:0005871];microtubule [GO:0005874];microtubule associated complex [GO:0005875];nucleus [GO:0005634];spindle microtubule [GO:0005876];spindle midzone [GO:0051233];spindle pole [GO:0000922]";"cytoplasm [GO:0005737];microtubule [GO:0005874]	ATP binding [GO:0005524];microtubule binding [GO:0008017];microtubule motor activity [GO:0003777]";"ATP binding [GO:0005524];"ATPase activity [GO:0016887]	42	42	62.9	71.386	0	323.31	46970000000	640	0.467298	0.524489	0.0367644	0.0199792	0.288442	-0.120905	0.0839828	-0.0515013	0.953774	-0.363328	0.0367644	0.0199792	0.393538	0.140884
27.1755	25.7594	27.7834	27.3771	26.6071	28.6687	NaN	25.7893	27.8469	25.8028	28.0046	28.229	26.7053	29.2553	27.7572	26.5429	26.53	28.2314	NaN	25.6877	27.0846		Elk	440		potassium ion transport [GO:0006813];regulation of ion transmembrane transport [GO:0034765];regulation of membrane potential [GO:0042391]";"potassium ion transmembrane transport [GO:0071805]	intracellular [GO:0005622];voltage-gated potassium channel complex [GO:0008076]";"integral component of plasma membrane [GO:0005887]	voltage-gated cation channel activity [GO:0022843];voltage-gated potassium channel activity [GO:0005249]";"phosphorelay sensor kinase activity [GO:0000155]	1	1	1.7	141.34	0.0064018	1.488	2151700000	22	0.155024	0.743267	0.469461	0.842387	0.315973	0.715291	0.610948	1.23958	0.118363	0.431981	0.469461	0.842387	0.0649281	0.127096
28.5779	29.1933	27.4497	28.6651	28.415	28.4396	29.3313	29.0195	28.3392	28.8444	28.8987	27.432	28.7519	27.3304	27.6964	27.9365	29.2689	27.4979	28.4482	28.6007	28.2351		Cenp-C	441		female meiosis chromosome segregation [GO:0016321];kinetochore assembly [GO:0051382];mitotic metaphase plate congression [GO:0007080];protein localization to chromosome, centromeric region [GO:0071459];protein localization to kinetochore [GO:0034501];regulation of centromere complex assembly [GO:0090230];regulation of stem cell differentiation [GO:2000736]";"chromosome segregation [GO:0007059]	condensed nuclear chromosome, centromeric region [GO:0000780];kinetochore [GO:0000776]";"chromosome, centromeric region [GO:0000775]		30	30	24.4	156.38	0	36.242	4193500000	118	0.225074	0.67213	0.0286256	0.0287714	0.131072	-0.193566	0.243552	-0.269032	0.684211	0.468645	0.0286256	0.0287714	0.179321	0.222337
NaN	25.363	NaN	24.9712	26.1567	25.3993	26.3165	27.1617	26.2268	25.568	24.7801	NaN	NaN	NaN	NaN	NaN	NaN	NaN	26.0846	25.3759	25.9226		Unc-115a	442		cytoskeleton organization [GO:0007010];lamellipodium assembly [GO:0030032];photoreceptor cell axon guidance [GO:0072499]";"axon guidance [GO:0007411]	nucleoplasm [GO:0005654]";"actin cytoskeleton [GO:0015629];actin cytoskeleton [GO:0015629]	actin filament binding [GO:0051015];metal ion binding [GO:0046872]";"actin binding [GO:0003779]	6	1	8.2	85.801	0.00034892	3.7588	371000000	9	1.3522	0.0988376	0.406597	-0.321797	0	NaN	0.653946	-0.62031	0.98885	0.773958	0.406597	-0.321797	0	NaN
34.1566	33.8965	34.2508	34.0877	33.5778	34.3076	33.6029	33.4034	34.0403	33.6621	33.8915	34.4403	33.7889	34.2344	33.9759	33.9526	33.5575	34.3509	33.7862	33.6925	33.7495	Serine/threonine-protein phosphatase 2A 55 kDa regulatory subunit B;Protein phosphatase PP2A 55 kDa regulatory subunit	tws	443		centrosome cycle [GO:0007098];circadian rhythm [GO:0007623];imaginal disc pattern formation [GO:0007447];maintenance of neuroblast polarity [GO:0045201];metaphase/anaphase transition of mitotic cell cycle [GO:0007091];mitotic cell cycle [GO:0000278];negative regulation of neuroblast proliferation [GO:0007406];peptidyl-serine dephosphorylation [GO:0070262];positive regulation of canonical Wnt sign…	cytosol [GO:0005829];nucleus [GO:0005634];protein phosphatase type 2A complex [GO:0000159]";"cytoplasm [GO:0005737];protein phosphatase type 2A complex [GO:0000159]	protein serine/threonine phosphatase activity [GO:0004722]";"protein phosphatase regulator activity [GO:0019888];protein phosphatase regulator activity [GO:0019888]	40	40	62.3	56.966	0	323.31	186660000000	1032	0.4641	0.514573	0.9814	0.303418	0.384937	0.210941	0.733449	0.256116	0.115735	-0.0605316	0.9814	0.303418	0.162734	0.0924765
28.0902	27.3148	27.5568	26.4786	27.0547	27.5593	27.1649	27.2268	27.5063	29.0915	28.2714	28.3157	NaN	NaN	25.841	26.8597	27.5533	27.3489	27.4001	24.4825	25.1575	Protein KRTCAP2 homolog	CG31460	444			integral component of membrane [GO:0016021]		2	2	15.6	15.392	0	22.379	1910500000	23	1.05081	0.1453	1.39282	1.6624	0.803636	1.57396	0.977825	2.19988	0.84678	1.61932	1.39282	1.6624	0.0920939	0.0884355
35.5952	36.3103	35.57	35.8498	36.5816	35.9698	35.3872	36.1217	35.3043	35.6277	35.7242	35.6152	36.476	35.6274	35.3277	35.3965	36.0489	35.7473	35.9149	36.7587	36.015	60S ribosomal protein L11	RpL11	445		ribosomal large subunit assembly [GO:0000027]";"cytoplasmic translation [GO:0002181];translation [GO:0006412]	cytosolic large ribosomal subunit [GO:0022625];cytosolic ribosome [GO:0022626];nucleolus [GO:0005730]";"cytoplasm [GO:0005737];ribosome [GO:0005840]	structural constituent of ribosome [GO:0003735]";"rRNA binding [GO:0019843];structural constituent of ribosome [GO:0003735]	27	27	77.7	21.112	0	323.31	789850000000	1377	0.50058	0.452158	0.369971	-0.250071	0.696728	-0.498636	0.883919	-0.496509	0.774458	-0.625094	0.369971	-0.250071	0.412082	0.248565
33.4526	33.3157	33.2967	32.9735	32.8543	33.0852	33.1716	33.1239	33.161	33.3435	33.1683	33.3506	33.1995	33.3506	33.2542	33.0307	32.7813	33.0924	33.0587	32.8078	32.915	E3 ubiquitin-protein ligase hyd	hyd	446		compound eye development [GO:0048749];eye-antennal disc morphogenesis [GO:0007455];female gonad development [GO:0008585];imaginal disc development [GO:0007444];imaginal disc growth [GO:0007446];male meiosis cytokinesis [GO:0007112];negative regulation of histone H2A K63-linked ubiquitination [GO:1901315];negative regulation of smoothened signaling pathway [GO:0045879];positive regulation of canon…	nucleus [GO:0005634]";"cytoplasm [GO:0005737]	ubiquitin binding [GO:0043130];ubiquitin protein ligase activity [GO:0061630];ubiquitin-protein transferase activity [GO:0004842];ubiquitin-ubiquitin ligase activity [GO:0034450];zinc ion binding [GO:0008270]";"RNA binding [GO:0003723]	143	143	55.6	319.13	0	323.31	108680000000	1871	1.53315	0.154764	0.830687	0.235823	0.125205	0.0409431	2.87014	0.350613	1.41375	0.225002	0.830687	0.235823	0.626993	0.19488
28.7446	29.1243	29.2524	29.2916	29.4271	29.6512	29.0854	29.0013	29.6479	29.5515	29.8259	30.192	29.7122	30.0778	29.8124	30.3004	29.5545	30.5605	27.02	28.2175	28.0242	General odorant-binding protein 56d	Obp56d	447	+	response to pheromone [GO:0019236];sensory perception of chemical stimulus [GO:0007606];sensory perception of smell [GO:0007608]";"olfactory behavior [GO:0042048]	extracellular region [GO:0005576]	odorant binding [GO:0005549]	8	8	60.3	14.119	0	197.04	9470600000	121	5.18345	0.000519481	2.76626	1.49464	2.12138	2.38455	3.86398	2.10806	1.61345	1.49099	2.76626	1.49464	1.88934	-0.889907
26.5103	26.7235	26.6728	25.9763	26.2224	NaN	25.8119	26.9859	26.4821	26.06	26.5114	26.3493	26.3656	25.7529	26.7336	25.8265	25.0314	24.4432	NaN	25.7485	25.7023		Fancl	448	+	interstrand cross-link repair [GO:0036297];protein monoubiquitination [GO:0006513]";"DNA repair [GO:0006281]	Fanconi anaemia nuclear complex [GO:0043240]	ubiquitin-protein transferase activity [GO:0004842]";"metal ion binding [GO:0046872];ubiquitin-protein transferase activity [GO:0004842]	7	7	26.1	43.597	0	50.073	824660000	35	2.21852	0.0265885	1.48905	0.695644	0.503335	-0.625045	1.16204	0.570093	0.680415	0.701202	1.48905	0.695644	2.04377	1.32069
26.6003	28.8138	28.1934	26.6555	27.4067	26.9793	27.2272	28.3801	27.8224	26.4285	26.7125	26.8382	28.4709	28.0338	26.8998	26.8135	27.9058	27.4132	26.2447	27.5402	26.8072		Vrp1	449		actin cortical patch localization [GO:0051666];actin filament-based movement [GO:0030048];behavioral response to ethanol [GO:0048149];endocytosis [GO:0006897];myoblast fusion [GO:0007520];positive regulation of actin filament polymerization [GO:0030838];positive regulation of actin nucleation [GO:0051127];regulation of actin filament polymerization [GO:0030833];spermatid development [GO:0007286];…	actin filament [GO:0005884];cytoplasm [GO:0005737];filopodium tip [GO:0032433]";"actin cortical patch [GO:0030479]	actin filament binding [GO:0051015]	7	7	12.7	71.214	0	48.408	2085600000	44	0.186581	0.713436	0.445636	0.577487	0.450867	0.513456	0.279946	0.366601	0.878375	0.945903	0.445636	0.577487	0.039019	0.0640306
32.5555	32.2701	32.8967	32.8795	32.5341	33.0412	32.5527	32.5862	32.6206	33.0363	32.5783	33.0474	32.2082	32.6786	32.4478	32.457	32.2459	32.7815	32.7295	32.6405	32.7885	Vesicle-fusing ATPase 2	Nsf2	451		Golgi vesicle docking [GO:0048211];liquid clearance, open tracheal system [GO:0035002];neuromuscular synaptic transmission [GO:0007274];neurotransmitter secretion [GO:0007269];open tracheal system development [GO:0007424];regulation of synaptic growth at neuromuscular junction [GO:0008582];SNARE complex disassembly [GO:0035494];synaptic vesicle priming [GO:0016082];terminal branching, open trache…	Golgi stack [GO:0005795];presynapse [GO:0098793]";"cytoplasm [GO:0005737]	ATP binding [GO:0005524];ATP binding [GO:0005524]";metal ion binding [GO:0046872]";"ATPase activity [GO:0016887]	50	34	63.7	83.433	0	323.31	77490000000	854	0.0940898	0.885073	0.0467284	-0.023339	0.625889	-0.224747	0.0986086	-0.0534191	1.31791	-0.133008	0.0467284	-0.023339	0.456087	0.201408
27.0503	28.0065	26.9389	27.0902	27.4023	27.2551	27.0458	27.9787	27.3801	27.7151	27.3998	27.1909	28.0663	27.6184	27.0263	27.0863	27.3449	27.5563	26.9965	26.6902	26.9318	Protein kibra	kibra	452		compound eye morphogenesis [GO:0001745];negative regulation of glial cell proliferation [GO:0060253];negative regulation of organ growth [GO:0046621];positive regulation of apoptotic process [GO:0043065];positive regulation of hippo signaling [GO:0035332];regulation of transcription, DNA-templated [GO:0006355]";"border follicle cell migration [GO:0007298]	cell-cell junction [GO:0005911];cytoplasm [GO:0005737];cytoplasmic side of apical plasma membrane [GO:0098592];Kibra-Ex-Mer complex [GO:0036375]";"apical cortex [GO:0045179]		15	15	13.1	144.35	0	10.97	1826600000	56	0.693807	0.340337	0.906457	0.417746	1.29771	0.456338	1.51292	0.62999	0.967153	0.595402	0.906457	0.417746	0.0552357	-0.0385917
30.4486	29.7521	29.9978	30.0215	30.6743	30.1215	30.4779	30.5638	30.6615	29.3825	29.0941	29.6064	29.8272	30.0981	30.2536	30.7025	29.9756	28.9918	30.9314	30.4524	29.1488	Mitochondrial import inner membrane translocase subunit Tim16	blp	453		protein import into mitochondrial matrix [GO:0030150]";"instar larval development [GO:0002168];protein import into mitochondrial matrix [GO:0030150]	TIM23 mitochondrial import inner membrane translocase complex [GO:0005744]	mitochondrial protein-transporting ATPase activity [GO:0008566]	10	10	55.3	15.73	0	242.69	13516000000	173	0.578891	0.375229	0.00690125	-0.00823212	0.147019	-0.287589	0.495844	-0.467237	0.295513	0.390206	0.00690125	-0.00823212	0.312015	0.279357
25.1514	27.9645	28.3665	27.3485	27.7318	27.1397	26.9015	27.0952	26.3298	27.2129	27.269	27.0177	28.068	27.7277	27.7524	27.5137	28.0138	26.9489	26.7179	27.254	26.766	Protein TAPT1 homolog	CG7218	454		positive regulation of cilium assembly [GO:0045724]";"maintenance of protein localization in endoplasmic reticulum [GO:0035437]	endoplasmic reticulum [GO:0005783];integral component of endoplasmic reticulum membrane [GO:0030176]";"ciliary basal body [GO:0036064];integral component of membrane [GO:0016021]		10	10	17.3	75.565	0	68.867	1894600000	55	0.252867	0.635388	0.21809	0.371093	0.756747	0.57953	1.22606	0.595305	0.182289	-0.137138	0.21809	0.371093	0.109944	-0.208437
29.3976	28.7859	29.9054	28.2434	28.4259	27.816	28.8582	29.1229	28.7937	29.024	28.9827	28.4131	29.1317	29.8064	29.5282	29.5867	29.2261	30.1178	29.4892	28.9626	28.5136	E3 ubiquitin-protein ligase RNF181 homolog	CG7694	455		protein ubiquitination [GO:0016567]";"protein autoubiquitination [GO:0051865]	cytoplasm [GO:0005737]	ubiquitin-protein transferase activity [GO:0004842];zinc ion binding [GO:0008270]";"ubiquitin protein ligase activity [GO:0061630]	8	8	62.6	17.037	0	132.78	6328400000	106	0.511561	0.418045	0.178295	-0.226086	0.789902	0.655073	0.183293	0.159225	0.0745468	-0.063549	0.178295	-0.226086	0.933617	-0.881159
NaN	NaN	26.7938	26.6167	NaN	NaN	NaN	NaN	26.5142	26.6267	26.3704	26.6947	27.2363	25.534	27.0503	NaN	27.9699	24.3989	NaN	NaN	NaN			456					3	3	3.5	100.63	0.00034771	3.6007	556680000	9	0.0579823	0.895001	0	NaN	0	NaN	0	NaN	0	NaN	0	NaN	0.0978723	0.520821
29.7303	29.9669	30.3337	29.8005	30.468	29.708	29.769	30.0584	29.7846	29.9178	30.2889	29.8606	30.4819	30.0899	29.9878	30.1092	30.0515	29.2999	29.6423	29.8071	29.5362	Rho GTPase-activating protein 92B	RhoGAP92B;RhoGAP92B-RA	458		imaginal disc-derived leg morphogenesis [GO:0007480];negative regulation of actin filament polymerization [GO:0030837];neuromuscular synaptic transmission [GO:0007274];positive regulation of BMP secretion [GO:1900144];positive regulation of GTPase activity [GO:0043547];positive regulation of synaptic growth at neuromuscular junction [GO:0045887];regulation of actin cytoskeleton organization [GO:0…	intracellular [GO:0005622];neuromuscular junction [GO:0031594]";"cytoplasm [GO:0005737];cytoplasm [GO:0005737]	phospholipid binding [GO:0005543];Rac GTPase binding [GO:0048365];SH3 domain binding [GO:0017124]";"GTPase activator activity [GO:0005096];GTPase activator activity [GO:0005096]	34	34	36.9	82.955	0	95.043	10982000000	289	0.577459	0.434463	0.868229	0.339386	0.227636	0.158382	1.65049	0.442646	0.78539	0.208797	0.868229	0.339386	0.295229	0.181005
32.9538	33.5344	32.1923	33.1535	33.2077	32.7596	32.6747	33.1332	33.1011	32.8637	32.2773	32.6057	32.8477	33.6731	33.5852	33.1397	32.9576	32.7678	31.7981	33.2756	33.6542	V-type proton ATPase subunit G	Vha13	459		liquid clearance, open tracheal system [GO:0035002];terminal branching, open tracheal system [GO:0007430]";"ATP hydrolysis coupled proton transport [GO:0015991];proton transmembrane transport [GO:1902600]	vacuolar proton-transporting V-type ATPase complex [GO:0016471]";"plasma membrane proton-transporting V-type ATPase complex [GO:0033181];vacuolar proton-transporting V-type ATPase complex [GO:0016471]	ATPase activity, coupled to transmembrane movement of substances [GO:0042626]	8	8	59	13.625	0	302.11	96166000000	249	6.6977e-05	1	0.0437413	0.0575962	0.0266354	0.0457719	0.0469704	0.0661723	0.0348982	0.0603797	0.0437413	0.0575962	0.014159	0.0118243
NaN	NaN	NaN	NaN	NaN	NaN	NaN	NaN	NaN	NaN	NaN	NaN	NaN	NaN	NaN	NaN	NaN	NaN	24.4003	NaN	NaN		pre-mod(mdg4)-B	460					1	1	14.7	11.125	0.0038257	1.8636	12917000	2	NaN	NaN	0	NaN	0	NaN	0	NaN	0	NaN	0	NaN	-4.34294e-08	0
30.1727	30.0305	29.437	29.6033	30.0334	30.0475	29.7974	29.6189	30.0278	29.8998	29.7706	29.9999	29.6452	29.8973	29.6141	30.4883	30.1074	30.6824	30.3562	29.8331	30.0733	Probable ATP-dependent RNA helicase pitchoune	pit	461		cell proliferation [GO:0008283]	nucleolus [GO:0005730]	ATP binding [GO:0005524];helicase activity [GO:0004386];nucleotidyltransferase activity [GO:0016779];RNA binding [GO:0003723];RNA binding [GO:0003723]";RNA helicase activity [GO:0003724]";"ATP binding [GO:0005524];"ATPase activity [GO:0016887]	27	27	51.9	76.927	0	229.07	12407000000	296	1.70439	0.0860807	0.450802	-0.200119	0.678555	0.338472	1.12773	-0.283035	0.641529	-0.272833	0.450802	-0.200119	1.44685	-0.538591
24.3158	NaN	24.4515	25.0751	25.0041	24.9191	24.3193	23.9875	NaN	24.9213	NaN	23.0569	NaN	NaN	NaN	23.5529	25.0598	24.6656	NaN	NaN	NaN	NAD-dependent protein deacetylase Sirt2	Sirt2	462		histone deacetylation [GO:0016575];histone H3 deacetylation [GO:0070932];negative regulation of apoptotic process [GO:0043066];negative regulation of cell proliferation [GO:0008285];negative regulation of transcription from RNA polymerase II promoter in response to hypoxia [GO:0061428];protein deacetylation [GO:0006476]";"determination of adult lifespan [GO:0008340]	cytoplasm [GO:0005737];nucleus [GO:0005634]";"chromosome [GO:0005694]	NAD+ binding [GO:0070403];NAD-dependent histone deacetylase activity [GO:0017136];zinc ion binding [GO:0008270]";"histone deacetylase activity [GO:0004407];"NAD+ binding [GO:0070403]	5	5	16.1	40.112	0.0025168	2.1279	206690000	12	0.281755	0.602896	0	NaN	0	NaN	0	NaN	0	NaN	0	NaN	0.364366	0.327048
26.7776	26.731	26.2861	26.1107	26.7259	25.8346	24.6228	26.3481	25.4088	26.8658	27.1284	25.982	26.3331	26.5328	24.9175	26.1709	26.9255	25.2387	NaN	26.9658	26.0903	Biogenesis of lysosome-related organelles complex 1 subunit 5	Muted;muted	463			transport vesicle [GO:0030133]";"BLOC-1 complex [GO:0031083]		6	6	43.8	18.327	0.00017928	5.5124	766030000	29	0.432337	0.464072	0.121951	-0.117056	0.222957	-0.41632	0.143935	-0.234749	0.628079	-1.06814	0.121951	-0.117056	0.323223	0.299264
28.7877	28.9337	27.0726	27.9494	28.5054	28.7202	28.9534	29.1475	28.8879	29.4911	28.6623	29.095	30.062	29.0956	28.7885	29.6665	29.4419	29.9751	28.9066	29.263	28.5978	Protein sarah	sra	464		egg activation [GO:0007343];female meiotic nuclear division [GO:0007143];long-term memory [GO:0007616];male pronucleus assembly [GO:0035039];meiotic cell cycle [GO:0051321];mitochondrion organization [GO:0007005];multicellular organism development [GO:0007275];olfactory learning [GO:0008355];oogenesis [GO:0048477];regulation of calcineurin-NFAT signaling cascade [GO:0070884];regulation of female …	mitochondrial matrix [GO:0005759];nucleus [GO:0005634]";"cytoplasm [GO:0005737];intracellular [GO:0005622]	nucleic acid binding [GO:0003676]";phosphoprotein phosphatase activity [GO:0004721]";"calcium-dependent protein serine/threonine phosphatase regulator activity [GO:0008597];"nucleic acid binding [GO:0003676]	11	11	47.9	31.423	0	152.18	6584900000	94	1.77263	0.0526141	0.660809	-0.594324	1.45375	0.772057	0.366182	0.276611	0.13076	0.0737794	0.660809	-0.594324	1.79467	-1.36638
25.1136	26.9046	24.9577	24.7801	NaN	25.1789	24.986	NaN	21.0157	26.5509	NaN	NaN	27.0144	NaN	NaN	NaN	26.8433	NaN	NaN	26.4692	25.9353		CG6982-RC	465		establishment or maintenance of cell polarity [GO:0007163]	integral component of membrane [GO:0016021];septate junction [GO:0005918]";"cell junction [GO:0030054];"integral component of membrane [GO:0016021]		1	1	4.4	22.693	0.0036618	1.9007	450400000	8	1.10433	0.12365	0.56552	-0.815269	0	0.641019	0.615591	0.580399	0.600183	-3.2014	0.56552	-0.815269	0	-1.45629
34.9281	35.4577	34.9703	34.9776	34.6911	34.8192	35.1655	34.3762	35.1004	35.2041	35.0223	34.9513	34.3615	34.8388	34.897	34.8731	34.4214	34.8989	35.1603	34.973	34.95	ATP synthase subunit d, mitochondrial	ATPsyn-d	466		ATP metabolic process [GO:0046034];ATP synthesis coupled proton transport [GO:0015986];determination of adult lifespan [GO:0008340];negative regulation of ERK1 and ERK2 cascade [GO:0070373];negative regulation of TOR signaling [GO:0032007];proton transmembrane transport [GO:1902600];regulation of mitochondrial membrane potential [GO:0051881];response to oxidative stress [GO:0006979]";"ATP hydroly…	mitochondrial proton-transporting ATP synthase complex, coupling factor F(o) [GO:0000276];mitochondrion [GO:0005739]";"mitochondrial proton-transporting ATP synthase, stator stalk [GO:0000274];mitochondrial proton-transporting ATP synthase complex, coupling factor F(o) [GO:0000276]	proton transmembrane transporter activity [GO:0015078]";"hydrolase activity [GO:0016787];proton transmembrane transporter activity [GO:0015078]	20	20	94.9	20.2	0	323.31	376000000000	978	0.143437	0.823761	0.125253	-0.0537631	0.813622	-0.296618	0.373225	-0.14859	0.218963	-0.147053	0.125253	-0.0537631	0.632811	0.242855
NaN	NaN	NaN	NaN	NaN	NaN	25.4612	25.2021	24.8594	24.8789	24.4033	23.7819	25.7428	25.2458	25.0409	26.1926	25.1884	24.9803	23.7116	25.221	23.8688		pre-mod(mdg4)-I	467					4	4	32.6	15.618	0	7.6117	303410000	16	0.697893	0.297908	0	NaN	0.911181	1.18664	0.529386	0.581814	0.82447	0.90709	0	NaN	0	NaN
24.3261	24.3442	24.3853	NaN	23.1252	23.5861	25.3401	24.9623	25.143	NaN	24.7364	NaN	26.2247	NaN	26.4078	27.7085	NaN	24.9894	25.6003	25.5577	24.9075		pre-mod(mdg4)-E	468					1	1	10.5	21.472	0	12.629	408990000	8	1.64512	0.053	2.00462	-1.40177	0.38169	0.993772	0.308254	0.434499	0.343268	-0.206687	2.00462	-1.40177	1.45319	-2.39554
25.9983	24.9756	26.0055	26.9714	27.0309	25.5555	26.3403	25.3134	26.3464	26.8589	25.6172	27.2546	27.6096	25.3391	25.1039	25.9469	25.8768	25.3892	26.1484	25.2549	24.8041		Lnk	469		female mating behavior [GO:0060180];insulin receptor signaling pathway [GO:0008286];intracellular signal transduction [GO:0035556];positive regulation of cell growth [GO:0030307];positive regulation of cell proliferation [GO:0008284];positive regulation of ERK1 and ERK2 cascade [GO:0070374];positive regulation of phosphatidylinositol 3-kinase signaling [GO:0014068];positive regulation of protein …	plasma membrane [GO:0005886]";"cell cortex [GO:0005938]	signaling adaptor activity [GO:0035591];transmembrane receptor protein tyrosine kinase adaptor activity [GO:0005068]	9	9	17.3	64.985	0	69.832	912550000	32	0.213537	0.675687	0.607424	0.687089	0.317563	0.335184	0.625678	0.894748	0.498619	0.597581	0.607424	0.687089	0.303069	0.351905
30.7102	30.065	30.5785	29.9011	29.7958	30.1303	29.7448	29.8421	29.7093	30.0131	30.0967	30.2357	30.3383	30.0863	30.446	30.991	30.742	30.5213	30.03	29.9015	30.0532	Regulator of gene activity	Rga	470	+	mRNA catabolic process [GO:0006402];negative regulation of translation [GO:0017148];regulation of transcription, DNA-templated [GO:0006355];transcription, DNA-templated [GO:0006351]";"gene silencing by RNA [GO:0031047];regulation of transcription, DNA-templated [GO:0006355]	CCR4-NOT core complex [GO:0030015];cytoplasm [GO:0005737];nucleus [GO:0005634];P-body [GO:0000932]";"CCR4-NOT complex [GO:0030014];nucleus [GO:0005634]	poly(A)-specific ribonuclease activity [GO:0004535]	15	15	23.1	59.271	0	138.32	13927000000	235	2.64898	0.0224307	0.404216	0.201884	2.20571	0.756528	1.06023	0.207751	1.6901	-0.229535	0.404216	0.201884	1.2822	-0.554644
28.5853	29.8459	28.69	28.4227	29.0171	28.7558	28.8887	29.2255	28.5354	29.2334	29.3948	29.7372	29.9246	29.8171	29.6035	29.9799	29.9098	29.3055	30.158	29.3362	29.2555	Innexin;Innexin inx3	Inx3	471	+	intercellular transport [GO:0010496];ion transport [GO:0006811];phototransduction, visible light [GO:0007603]";"dorsal closure [GO:0007391];ion transport [GO:0006811]	cytoplasm [GO:0005737];gap junction [GO:0005921];integral component of membrane [GO:0016021];lateral plasma membrane [GO:0016328];plasma membrane [GO:0005886]";"apicolateral plasma membrane [GO:0016327];"gap junction [GO:0005921]	gap junction channel activity [GO:0005243]	16	16	39.7	45.356	0	168.38	10621000000	220	1.87934	0.0492801	1.0324	-0.697078	0.154696	0.148551	0.0505722	0.0352017	0.933772	-0.700002	1.0324	-0.697078	1.40129	-0.845628
29.101	28.406	27.7003	28.0077	27.5224	28.0352	28.9644	28.4013	28.1231	28.0394	28.1434	27.7548	28.879	28.9806	28.7816	28.7877	29.3831	28.8788	27.5654	27.324	26.3985		dgrn	472	+	neurogenesis [GO:0022008];positive regulation of transcription by RNA polymerase II [GO:0045944];positive regulation of transcription, DNA-templated [GO:0045893];protein ubiquitination [GO:0016567];regulation of embryonic development [GO:0045995];regulation of establishment of protein localization [GO:0070201];regulation of protein binding [GO:0043393];sex determination [GO:0007530]";"double-stra…	nuclear periphery [GO:0034399];nucleus [GO:0005634];SUMO-targeted ubiquitin ligase complex [GO:0033768]";"cytoplasm [GO:0005737]	SUMO binding [GO:0032183];transcription factor binding [GO:0008134];ubiquitin protein ligase activity [GO:0061630];zinc ion binding [GO:0008270]";"RNA polymerase II repressing transcription factor binding [GO:0001103]	11	11	64.9	23.411	0	98.457	3465600000	73	2.37423	0.02115	1.39867	1.03283	2.06001	1.92063	1.97827	1.33386	1.49605	1.40033	1.39867	1.03283	1.37093	-0.887804
32.9095	33.0053	33.2217	32.9298	32.7603	32.9876	32.8558	32.7335	32.7868	32.9955	32.4756	32.9036	33.0448	33.1167	32.9492	32.72	32.5342	32.5543	32.6053	32.6514	32.7232	Atlastin	atl	473		endoplasmic reticulum organization [GO:0007029];Golgi organization [GO:0007030];membrane fusion [GO:0061025];microtubule depolymerization [GO:0007019];muscle organ development [GO:0007517];neuromuscular junction development [GO:0007528];positive regulation of axon extension involved in regeneration [GO:0048691];protein homooligomerization [GO:0051260];regulation of microtubule depolymerization [G…	endomembrane system [GO:0012505];endoplasmic reticulum [GO:0005783];Golgi apparatus [GO:0005794];Golgi membrane [GO:0000139];integral component of membrane [GO:0016021];intrinsic component of endoplasmic reticulum membrane [GO:0031227];membrane [GO:0016020]";"cytoplasm [GO:0005737];integral component of membrane [GO:0016021]	GTP binding [GO:0005525];GTP binding [GO:0005525]";guanyl ribonucleotide binding [GO:0032561];identical protein binding [GO:0042802];protein homodimerization activity [GO:0042803]";"GTPase activity [GO:0003924]	34	34	68.9	60.911	0	323.31	99423000000	796	1.69568	0.12122	1.89462	0.309059	0.347873	-0.0571543	0.969365	0.254262	1.25714	0.132083	1.89462	0.309059	2.13301	0.366213
29.495	29.7333	29.7597	29.7695	29.7141	29.8651	29.4353	29.3178	29.7936	29.9947	29.7096	29.3675	29.3757	29.3604	29.3421	29.2243	28.9716	29.6411	29.83	28.5999	29.8051	Putative riboflavin kinase	anon-84Ea	474		riboflavin biosynthetic process [GO:0009231]";"FMN biosynthetic process [GO:0009398];riboflavin biosynthetic process [GO:0009231]	cytoplasm [GO:0005737]	metal ion binding [GO:0046872];riboflavin kinase activity [GO:0008531]";"ATP binding [GO:0005524];riboflavin kinase activity [GO:0008531]	11	11	90.8	16.985	0	163.76	8882900000	170	0.371296	0.573713	0.528123	0.311122	0.106228	-0.132656	0.139051	0.113329	0.0855749	0.103879	0.528123	0.311122	1.70579	0.443778
36.7136	35.9516	36.4591	36.5775	36.1836	36.2173	36.5935	36.3665	36.5305	35.7809	35.4248	35.6946	36.0272	35.7748	36.0943	36.1643	35.5514	35.7521	37.008	36.4983	36.56	Nucleoside diphosphate kinase	awd	475	+	CTP biosynthetic process [GO:0006241];epithelial cell migration, open tracheal system [GO:0007427];establishment or maintenance of polarity of follicular epithelium [GO:0016334];GTP biosynthetic process [GO:0006183];microtubule-based process [GO:0007017];mitotic cell cycle [GO:0000278];nucleoside diphosphate phosphorylation [GO:0006165];nucleotide metabolic process [GO:0009117];open tracheal syst…	microtubule [GO:0005874];nuclear microtubule [GO:0005880];plasma membrane [GO:0005886]";"cytoplasm [GO:0005737]	GTP binding [GO:0005525];kinase activity [GO:0016301];magnesium ion binding [GO:0000287];microtubule binding [GO:0008017];nucleoside diphosphate kinase activity [GO:0004550]";"ATP binding [GO:0005524]	25	25	94.8	17.17	0	323.31	1181000000000	2564	3.37281	0.00751335	0.876134	-0.33828	1.6375	-0.866132	2.79729	-0.889312	0.478007	-0.191895	0.876134	-0.33828	1.42556	0.527852
33.0432	33.0104	33.1105	32.9971	32.7778	32.9396	32.8254	32.9622	33.1425	32.8471	32.8684	33.0947	32.9152	32.8346	32.9144	32.807	32.8248	33.0218	33.2133	33.2207	33.1881	Kinesin-like protein;Protein claret segregational	ncd	476		chromosome segregation [GO:0007059];distributive segregation [GO:0032837];meiotic spindle organization [GO:0000212];microtubule bundle formation [GO:0001578];microtubule-based movement [GO:0007018];minus-end directed microtubule sliding [GO:0031534];mitotic centrosome separation [GO:0007100];mitotic spindle assembly [GO:0090307];mitotic spindle elongation [GO:0000022];mitotic spindle organization…	cytosol [GO:0005829];kinesin complex [GO:0005871];meiotic spindle [GO:0072687];microtubule [GO:0005874];mitotic spindle [GO:0072686];mitotic spindle microtubule [GO:1990498];nucleus [GO:0005634];spindle [GO:0005819]";"centrosome [GO:0005813];microtubule [GO:0005874]	ATP binding [GO:0005524];ATP-dependent microtubule motor activity, minus-end-directed [GO:0008569];microtubule binding [GO:0008017];microtubule motor activity [GO:0003777];microtubule motor activity [GO:0003777]";protein homodimerization activity [GO:0042803]";"ATP binding [GO:0005524];"ATPase activity [GO:0016887]	44	44	65.4	77.473	0	323.31	96655000000	1061	1.8706	0.14281	1.90105	-0.227613	2.01241	-0.32282	2.8733	-0.294965	1.17426	-0.230648	1.90105	-0.227613	0.550634	0.0952066
33.1619	33.0863	33.1883	33.1177	32.9026	32.901	32.8531	32.9355	32.5028	33.4442	33.1436	33.2729	32.8081	32.9748	33.1079	33.5059	33.3743	33.3758	33.2015	32.9047	33.1089	DNA-directed RNA polymerase;DNA-directed RNA polymerase II subunit RPB2	RpII140	477		transcription by RNA polymerase II [GO:0006366];transcription, DNA-templated [GO:0006351]	RNA polymerase II, core complex [GO:0005665]	DNA-directed 5'-3' RNA polymerase activity [GO:0003899];metal ion binding [GO:0046872];ribonucleoside binding [GO:0032549]";"DNA binding [GO:0003677]	76	76	59.5	134.04	0	323.31	108690000000	1364	2.20354	0.0570553	0.044565	-0.0121015	1.62072	0.346949	0.141195	0.0535463	0.90352	-0.307934	0.044565	-0.0121015	2.51195	-0.359051
31.5871	31.4179	31.6614	31.275	30.9792	31.4158	31.0294	30.9098	31.1421	31.0678	30.7304	31.3087	30.9956	31.4362	31.3959	31.02	30.7301	30.9371	31.1383	30.8747	31.2692		Akt1	478		intracellular signal transduction [GO:0035556]	intracellular [GO:0005622]	protein serine/threonine kinase activity [GO:0004674]";"ATP binding [GO:0005524]	23	1	43.2	59.91	0	323.31	27215000000	460	1.24433	0.176286	0.940009	0.295335	0.616304	-0.198331	0.129528	0.0617132	0.19149	-0.0669848	0.940009	0.295335	1.80113	0.493665
31.8239	31.5225	31.5946	31.4541	31.5854	31.3746	32.0549	32.0184	32.0897	31.2816	31.5557	31.8428	32.1684	32.0428	31.8563	31.7685	32.054	31.8244	31.7923	31.6602	31.6486		CG4538-RA	479		protein folding [GO:0006457];proteolysis [GO:0006508]";"protein catabolic process [GO:0030163];"protein folding [GO:0006457]	mitochondrion [GO:0005739]";"mitochondrial matrix [GO:0005759];mitochondrion [GO:0005739]	ATP-dependent peptidase activity [GO:0004176];serine-type endopeptidase activity [GO:0004252];unfolded protein binding [GO:0051082]";"ATP binding [GO:0005524]	30	30	48.4	71.278	0	323.31	42275000000	484	1.37736	0.152971	0.725426	-0.141166	0.856257	0.181967	0.182009	0.0908966	2.66203	0.353981	0.725426	-0.141166	1.68982	-0.323134
24.8747	27.0373	26.7094	NaN	27.1991	26.0707	25.0835	26.4326	26.8663	25.2094	26.2986	26.5325	NaN	25.7169	NaN	NaN	27.3461	27.7677	25.7409	26.8163	25.8		att-ORFA	480		mitochondrial transmembrane transport [GO:1990542];positive regulation of innate immune response [GO:0045089]";"defense response to Gram-negative bacterium [GO:0050829]	integral component of mitochondrial membrane [GO:0032592];mitochondrial inner membrane [GO:0005743]";"integral component of membrane [GO:0016021];integral component of membrane [GO:0016021]	antiporter activity [GO:0015297];transmembrane transporter activity [GO:0022857]	6	6	24.5	40.239	0	54.319	804960000	16	0.634824	0.314028	0.16129	0.259178	1.24359	1.43787	0.148349	-0.179713	0.00430331	0.00841777	0.16129	0.259178	0.794164	-1.17869
NaN	26.7131	27.1096	NaN	26.6085	24.1146	24.0786	26.2761	26.2917	25.3238	27.4724	27.1324	26.576	25.6641	26.8574	26.8492	26.7062	26.6687	24.7341	26.4859	27.4249		pre-mod(mdg4)-C	481					5	5	51.1	14.634	0	36.843	967730000	49	0.162671	0.735222	0.0255305	-0.0785046	0.266143	0.526454	0.154685	0.289423	0.244073	-0.666129	0.0255305	-0.0785046	0.311407	-0.604958
35.5927	35.082	35.8246	35.8222	35.3421	35.7771	35.4957	35.3959	35.9446	35.7971	35.6315	35.9374	35.6999	35.7024	35.8567	35.6278	35.2816	35.5545	35.8194	35.5907	35.745	26S protease regulatory subunit 4	Rpt2	482		proteasome-mediated ubiquitin-dependent protein catabolic process [GO:0043161];protein catabolic process [GO:0030163]	nucleoplasm [GO:0005654];proteasome regulatory particle [GO:0005838];proteasome regulatory particle, base subcomplex [GO:0008540]";"cytosol [GO:0005829];cytoplasm [GO:0005737]	ATP binding [GO:0005524];proteasome-activating ATPase activity [GO:0036402];proteasome-activating ATPase activity [GO:0036402]";TBP-class protein binding [GO:0017025]";"ATP binding [GO:0005524];"ATPase activity [GO:0016887]	49	49	78.8	49.323	0	323.31	727320000000	2832	0.412159	0.586912	0.333939	-0.144907	0.856446	-0.230367	0.268836	0.0524699	0.229182	-0.106284	0.333939	-0.144907	0.171819	0.08546
30.5971	30.8924	30.7971	30.3162	30.3503	30.241	29.8004	30.263	30.371	30.1482	30.4541	30.7007	30.697	30.591	30.3457	29.6289	30.0172	30.4978	30.4529	30.2802	29.9467		uex	483		cellular ion homeostasis [GO:0006873]	integral component of membrane [GO:0016021]";"cell [GO:0005623]		33	33	47.2	93.282	0	323.31	15033000000	313	1.00505	0.225922	0.823716	0.305757	0.241335	-0.178638	0.825764	0.262859	0.130986	-0.0817871	0.823716	0.305757	1.12912	0.484394
27.4879	27.3546	27.6879	27.7814	27.0817	27.6035	26.7537	27.2635	27.0261	27.4954	27.7482	27.7526	27.1727	27.6462	27.1339	26.5982	27.2285	27.0912	27.9741	27.195	27.1254		CG1116-RB	484		retrograde transport, endosome to Golgi [GO:0042147]";"positive regulation of GTPase activity [GO:0043547]	Golgi membrane [GO:0000139];RIC1-RGP1 guanyl-nucleotide exchange factor complex [GO:0034066]";"cytosol [GO:0005829];cytosol [GO:0005829]	Rab guanyl-nucleotide exchange factor activity [GO:0017112]";"Rab GTPase binding [GO:0017137];Rab GTPase binding [GO:0017137]	14	14	35.4	49.58	0	53.159	2002600000	91	1.19438	0.162021	0.108102	0.0679938	0.62013	-0.458872	0.0901338	0.0600061	0.604044	-0.417089	0.108102	0.0679938	1.50096	0.526866
29.0748	28.9454	27.8599	28.95	28.9129	28.9926	28.9841	29.3753	29.1479	29.2337	29.347	29.158	29.355	28.8437	28.7717	29.4496	29.0431	28.3784	29.2564	29.6078	28.9245		cu;nocturnin-RD	485		nuclear-transcribed mRNA poly(A) tail shortening [GO:0000289];response to light stimulus [GO:0009416]";"locomotor rhythm [GO:0045475]	cytoplasm [GO:0005737]";"CCR4-NOT complex [GO:0030014]		21	21	52.5	49.952	0	96.228	6175300000	135	0.415353	0.525015	0.790347	-0.473622	0.342816	-0.305866	0.309922	-0.144725	0.154101	-0.0938193	0.790347	-0.473622	0.194684	-0.167756
NaN	NaN	NaN	NaN	NaN	NaN	26.9316	NaN	27.2401	NaN	NaN	27.6785	NaN	NaN	NaN	NaN	NaN	26.6554	NaN	NaN	27.2768	Protein kinase DC1	Pka-C2	486		protein phosphorylation [GO:0006468]";"peptidyl-serine phosphorylation [GO:0018105]	nucleotide-activated protein kinase complex [GO:0031588]	cAMP-dependent protein kinase activity [GO:0004691];cAMP-dependent protein kinase activity [GO:0004691]";protein kinase A regulatory subunit binding [GO:0034237];protein serine/threonine kinase activity [GO:0004674]";"ATP binding [GO:0005524]	1	1	3.4	41.369	0.00017899	5.4293	544810000	5	NaN	NaN	0	NaN	0	-0.621353	0	0.401733	0	-0.190924	0	NaN	0	NaN
27.043	25.8925	27.1041	25.5236	30.0765	25.384	26.941	26.6517	26.005	27.2927	25.7664	26.9432	26.6886	26.8112	26.9788	NaN	26.7727	27.0343	26.0767	27.3664	27.3334			487				Rab GTPase binding [GO:0017137]	11	11	13.4	117.66	0	21.814	1335000000	41	0.00345924	0.996431	0.0280924	-0.0882047	0.0127992	-0.0219997	0.166508	-0.178681	0.317501	-0.392923	0.0280924	-0.0882047	0.0171679	-0.066205
25.9782	27.0548	26.6387	26.1861	27.922	26.2726	26.357	27.5786	27.3851	27.4281	26.9972	NaN	27.0262	26.6584	27.1685	25.739	27.7424	27.3684	26.4012	27.3846	25.1174	Zinc finger protein jing	jing	488		border follicle cell migration [GO:0007298];central nervous system development [GO:0007417];chromatin organization [GO:0006325];glial cell migration [GO:0008347];imaginal disc-derived wing vein specification [GO:0007474];leg disc proximal/distal pattern formation [GO:0007479];negative regulation of transcription by RNA polymerase II [GO:0000122];open tracheal system development [GO:0007424];posit…	nucleus [GO:0005634]";"ESC/E(Z) complex [GO:0035098]	nucleic acid binding [GO:0003676]";"metal ion binding [GO:0046872];nucleic acid binding [GO:0003676]	9	9	6.3	153.37	0	14.438	1267900000	42	0.199671	0.694822	0.253742	0.374292	0.29191	0.648844	0.726611	0.754614	0.45885	0.805826	0.253742	0.374292	0.18358	-0.274551
30.3368	29.4921	29.5173	28.7874	28.916	28.4803	29.4158	29.612	29.5225	28.5639	28.3431	29.1882	29.4475	28.009	29.4457	28.2768	28.3963	26.0566	28.1539	28.6102	28.5056	Tumor necrosis factor alpha-induced protein 8-like protein	CG4091	489		positive regulation of JNK cascade [GO:0046330];regulation of autophagy [GO:0010506];regulation of microtubule cytoskeleton organization [GO:0070507];salivary gland morphogenesis [GO:0007435]";"positive regulation of apoptotic process [GO:0043065];regulation of apoptotic process [GO:0042981]	cytoplasm [GO:0005737]";"cell projection [GO:0042995]	cysteine-type endopeptidase inhibitor activity involved in apoptotic process [GO:0043027]	6	6	44.7	21.387	0	32.184	5669900000	70	1.70858	0.0525352	1.08859	0.831756	0.474929	-0.846652	0.504999	0.40968	2.7343	1.09356	1.08859	0.831756	1.46964	1.67841
24.4118	25.3992	24.926	26.3506	26.3364	NaN	25.4013	26.5753	26.1677	23.6925	23.8992	25.1013	25.2807	25.7628	25.3946	NaN	NaN	26.306	24.9338	24.2049	NaN	Transcriptional coactivator yorkie	yki	490		cell competition in a multicellular organism [GO:0035212];cell fate specification [GO:0001708];cell proliferation [GO:0008283];heart morphogenesis [GO:0003007];hippo signaling [GO:0035329];morphogenesis of an epithelial sheet [GO:0002011];negative regulation of apoptotic process [GO:0043066];positive regulation of glial cell proliferation [GO:0060252];positive regulation of growth [GO:0045927];po…	nucleoplasm [GO:0005654];nucleus [GO:0005634]";"cytosol [GO:0005829]	transcription coactivator activity [GO:0003713];transcription factor binding [GO:0008134]";"14-3-3 protein binding [GO:0071889]	6	6	23.3	43.594	0	67.484	472110000	12	0.830685	0.226776	0.637533	0.915435	0	1.73659	0.168211	0.2858	1.18261	1.47871	0.637533	0.915435	0	-0.821153
32.0607	32.3896	32.2192	31.6774	31.648	31.8185	31.2533	31.1271	31.1574	31.7065	31.6209	31.7416	31.3331	31.6483	31.278	31.5447	31.6318	31.5995	31.383	31.3237	31.3173	Serine/threonine-protein phosphatase 4 regulatory subunit 3	flfl	491	+	basal protein localization [GO:0045175];DNA repair [GO:0006281]";"asymmetric neuroblast division [GO:0055059]	cytoplasm [GO:0005737];membrane [GO:0016020];nucleus [GO:0005634];protein phosphatase 4 complex [GO:0030289]";"chromosome, centromeric region [GO:0000775]		28	28	27	109.29	0	298.93	36004000000	422	3.35659	0.00988471	1.97536	0.627579	2.79616	0.250667	0.932229	0.213425	1.69345	-0.162069	1.97536	0.627579	1.11464	0.376912
30.2027	30.9427	30.8747	30.621	30.833	30.2865	31.0068	30.3989	30.2849	30.2668	30.8423	30.2466	30.9088	31.3182	30.7859	31.1533	30.9853	31.0725	31.4484	30.6893	31.0726	Glutamate dehydrogenase	Gdh	492		cellular amino acid metabolic process [GO:0006520]		oxidoreductase activity, acting on the CH-NH2 group of donors, NAD or NADP as acceptor [GO:0016639]	39	2	84.9	43.064	0	253.63	20813000000	109	0.676517	0.352752	0.983745	-0.443317	0.000414495	0.000285467	0.572183	-0.341979	0.741535	-0.50655	0.983745	-0.443317	1.26997	-0.443603
33.5701	32.0552	33.0676	33.5822	33.2331	32.9668	33.7279	33.4174	32.784	33.2521	33.6773	33.585	33.6085	34.1143	33.4718	33.7985	33.8625	33.8028	34.1191	33.7875	32.6294	40S ribosomal protein S29	RpS29	493		cytoplasmic translation [GO:0002181];translation [GO:0006412]	polysomal ribosome [GO:0042788];rough endoplasmic reticulum [GO:0005791]";"cytosolic small ribosomal subunit [GO:0022627];ribosome [GO:0005840]	zinc ion binding [GO:0008270]";"structural constituent of ribosome [GO:0003735];structural constituent of ribosome [GO:0003735]	7	7	67.9	6.5906	0	42.761	133800000000	412	0.654384	0.338215	0.437078	-0.432855	0.274525	0.309241	0.116485	0.106159	0.141329	-0.202253	0.437078	-0.432855	1.20073	-0.742096
30.1204	29.8017	30.0158	30.2048	30.3036	30.2875	30.0751	30.1985	29.9464	29.966	30.105	29.9404	30.0919	29.7282	29.555	29.2873	29.9859	28.4732	29.9477	30.1021	30.2204		Dg	494		axon guidance [GO:0007411];cytoskeletal anchoring at plasma membrane [GO:0007016];establishment of cell polarity [GO:0030010];establishment or maintenance of apical/basal cell polarity [GO:0035088];establishment or maintenance of cell polarity [GO:0007163];establishment or maintenance of epithelial cell apical/basal polarity [GO:0045197];establishment or maintenance of polarity of follicular epit…	dystroglycan complex [GO:0016011];dystrophin-associated glycoprotein complex [GO:0016010];integral component of membrane [GO:0016021];neuromuscular junction [GO:0031594];plasma membrane [GO:0005886];sarcolemma [GO:0042383];T-tubule [GO:0030315];Z disc [GO:0030018]";"basal plasma membrane [GO:0009925]	structural constituent of muscle [GO:0008307]";"calcium ion binding [GO:0005509]	33	33	27.7	129.58	0	217.91	11054000000	289	1.8295	0.0608736	0.0947642	0.0322091	0.882242	-0.841262	0.679474	-0.192321	0.0537503	-0.0167516	0.0947642	0.0322091	1.5992	0.873471
27.2332	27.9236	28.3226	28.0125	28.6066	27.4019	27.2243	27.6417	25.479	28.8176	28.9449	27.5672	28.5457	27.4311	27.884	28.0203	28.9541	28.034	28.5619	27.8266	27.9011	O-phosphoseryl-tRNA(Sec) selenium transferase	CG1427-RC	495		translation [GO:0006412]";"selenocysteinyl-tRNA(Sec) biosynthetic process [GO:0097056];selenocysteinyl-tRNA(Sec) biosynthetic process [GO:0097056]	cytoplasm [GO:0005737]	tRNA binding [GO:0000049]";"transferase activity, transferring selenium-containing groups [GO:0016785];transferase activity, transferring selenium-containing groups [GO:0016785]	18	18	48.3	52.907	0	148.14	3042200000	81	1.21616	0.119154	0.205688	-0.179796	0.24431	0.239607	0.0885828	0.101881	0.871225	-1.31486	0.205688	-0.179796	0.524703	-0.419404
32.0836	32.0688	32.4447	32.2663	32.0512	31.9697	31.6899	31.5799	32.0947	32.0599	32.3687	31.8467	32.5147	32.2874	31.9814	32.2374	32.3795	32.2216	32.2956	32.5017	32.3613	Gelsolin	Gel	496		actin filament polymerization [GO:0030041]	cytosol [GO:0005829];extracellular region [GO:0005576]";"actin filament [GO:0005884]	actin filament binding [GO:0051015];metal ion binding [GO:0046872]";"actin binding [GO:0003779];actin filament binding [GO:0051015]	33	33	41.1	88.373	0	323.31	54885000000	543	1.59331	0.114902	1.15191	-0.238844	0.606773	-0.106725	0.649683	-0.209745	1.62804	-0.598053	1.15191	-0.238844	0.572069	-0.132119
33.6371	33.8293	34.1147	33.8337	34.2993	34.2813	33.6409	33.6628	33.6492	33.8359	34.0911	34.1637	34.2925	34.2256	33.9812	34.0409	34.1799	34.447	34.2581	33.7859	33.9188	Serine-arginine protein 55	B52	497		mitotic cell cycle [GO:0000278];mitotic G1/S transition checkpoint [GO:0044819];mRNA cis splicing, via spliceosome [GO:0045292];mRNA splicing, via spliceosome [GO:0000398];regulation of alternative mRNA splicing, via spliceosome [GO:0000381];regulation of gene expression [GO:0010468];regulation of mRNA 3'-end processing [GO:0031440];regulation of mRNA splicing, via spliceosome [GO:0048024];regula…	nuclear speck [GO:0016607];nucleus [GO:0005634];polytene chromosome [GO:0005700];precatalytic spliceosome [GO:0071011];transcriptionally active chromatin [GO:0035327]";"catalytic step 2 spliceosome [GO:0071013]	RNA binding [GO:0003723]";"mRNA binding [GO:0003729];RNA binding [GO:0003723]	24	24	39.7	40.381	0	323.31	220060000000	703	1.3815	0.151304	0.021365	0.0116603	0.566685	0.235039	0.35394	0.110749	1.1249	-0.336619	0.021365	0.0116603	0.592552	-0.223378
26.3389	27.2049	27.4616	NaN	25.663	25.9178	29.6235	NaN	26.4003	28.5837	26.4214	26.7539	28.9973	25.5328	NaN	NaN	24.7981	NaN	NaN	31.3445	30.4802		Pbp49	498	+	snRNA transcription by RNA polymerase II [GO:0042795];snRNA transcription by RNA polymerase III [GO:0042796];snRNA transcription by RNA polymerase III [GO:0042796]";transcription by RNA polymerase III [GO:0006383]";"protein-DNA complex assembly [GO:0065004]	snRNA-activating protein complex [GO:0019185]	DNA binding [GO:0003677];RNA polymerase II proximal promoter sequence-specific DNA binding [GO:0000978];RNA polymerase III type 3 promoter sequence-specific DNA binding [GO:0001006];sequence-specific DNA binding [GO:0043565];sequence-specific DNA binding [GO:0043565]";transcription factor activity, sequence-specific DNA binding, RNA polymerase recruiting [GO:0001011]";"bent DNA binding [GO:000368…	4	4	16.5	40.895	0.0008515	2.6008	2574300000	9	1.8148	0.0375553	3.02255	-4.39508	0	-6.11425	1.63931	-3.65452	0.649198	-2.90045	3.02255	-4.39508	0	1.71916
25.8736	25.2037	25.4708	26.2372	24.5812	25.152	25.7263	25.8143	26.2224	24.8147	24.7526	26.1363	26.3364	26.3556	25.7504	25.0331	26.0176	NaN	25.8811	24.8511	24.5416			499			integral component of membrane [GO:0016021]		4	4	31.6	21.76	0	22.51	578770000	22	0.258918	0.6313	0.321104	0.328486	0.263252	0.434108	0.551124	0.599743	0.893855	0.829763	0.321104	0.328486	0.077127	-0.105622
34.8455	34.3914	35.0715	35.1382	34.787	35.2842	35.1092	35.0576	35.418	35.4654	35.1066	35.5506	35.2088	35.6911	35.1986	35.0284	35.0301	35.2461	35.0559	34.5542	35.178		grsm	501			cytoplasm [GO:0005737]	manganese ion binding [GO:0030145];metalloexopeptidase activity [GO:0008235]";"aminopeptidase activity [GO:0004177]	34	34	72.4	60.169	0	323.31	444550000000	1788	1.16547	0.183708	0.0145863	-0.00976054	0.350205	0.172129	1.29857	0.440804	0.52748	0.265551	0.0145863	-0.00976054	0.415655	-0.18189
32.918	32.4517	32.4396	32.2987	32.1351	32.6814	32.6258	32.2447	32.511	32.6369	32.4309	32.7373	31.6395	32.4267	32.8981	32.7801	31.9956	32.6208	32.7925	32.3122	32.732		mub	502		thermosensory behavior [GO:0040040]		RNA binding [GO:0003723]	17	0	55.2	38.457	0	323.31	75285000000	471	0.0104689	0.98807	0.268326	-0.124808	0.199588	-0.146734	0.215038	-0.150671	0.331617	-0.151775	0.268326	-0.124808	0.0332933	0.0219262
32.7959	33.0893	33.1032	33.5599	32.9128	32.8129	32.5765	32.5275	32.4389	32.6542	32.4411	32.9042	32.4254	32.0847	32.0946	30.9492	29.2698	32.0292	32.7863	31.8652	31.3134	Neuropeptide-like 2	Nplp2	503	+	neuropeptide signaling pathway [GO:0007218]";"humoral immune response [GO:0006959];neuropeptide signaling pathway [GO:0007218]	extracellular space [GO:0005615]";"extracellular region [GO:0005576]	neuropeptide hormone activity [GO:0005184]	7	7	57	9.4118	0	73.996	66374000000	150	2.88087	0.00892722	1.83288	1.05733	0.610378	-1.2389	0.636905	0.445709	0.537872	0.525998	1.83288	1.05733	2.371	2.29624
24.3417	26.3152	24.2306	24.279	26.0746	24.8368	23.5551	NaN	NaN	25.5078	25.5066	26.7779	25.8699	24.9631	25.5524	NaN	NaN	NaN	23.7366	24.18	23.6183			504	+		nuclear body [GO:0016604]	DNA binding [GO:0003677]	6	6	20.8	34.789	0.00017787	5.0886	518980000	17	1.88759	0.0459019	1.08726	1.16802	0	NaN	2.75217	1.85135	0	-0.289873	1.08726	1.16802	0	NaN
34.5166	34.292	34.2857	34.2591	33.8519	34.2363	33.9956	33.9268	34.0324	34.539	34.1566	34.4141	34.0969	34.331	34.4796	33.8719	33.531	33.7297	34.1776	34.0082	34.0116	Exportin-1	emb	505	+	mRNA transport [GO:0051028];multicellular organism development [GO:0007275];nuclear export [GO:0051168];protein export from nucleus [GO:0006611];protein transport [GO:0015031];regulation of cellular response to hypoxia [GO:1900037];regulation of protein export from nucleus [GO:0046825];ribosomal large subunit export from nucleus [GO:0000055];ribosomal small subunit export from nucleus [GO:0000056…	nuclear membrane [GO:0031965];nuclear pore [GO:0005643];nucleus [GO:0005634]";"cytoplasm [GO:0005737];nucleus [GO:0005634]	protein transporter activity [GO:0008565];Ran GTPase binding [GO:0008536]";"nuclear export signal receptor activity [GO:0005049];Ran GTPase binding [GO:0008536]	70	70	67	122.8	0	323.31	238200000000	1785	2.98054	0.0206815	0.630997	0.174445	1.45173	-0.354952	1.3305	0.27036	0.561733	-0.0808856	0.630997	0.174445	2.10032	0.529398
28.5823	28.1454	28.9516	28.9912	27.82	28.0723	28.7828	28.5294	28.5764	29.606	28.987	28.7601	28.4198	28.513	28.8703	27.231	27.7247	26.8399	28.6299	28.5058	28.8094	Protein maelstrom	mael	506	+	dorsal appendage formation [GO:0046843];dorsal/ventral axis specification [GO:0009950];gene silencing by RNA [GO:0031047];germ-line stem cell population maintenance [GO:0030718];intracellular mRNA localization [GO:0008298];male meiotic nuclear division [GO:0007140];microtubule organizing center organization [GO:0031023];miRNA metabolic process [GO:0010586];negative regulation of transcription, DN…	nucleus [GO:0005634];P granule [GO:0043186]";perinuclear region of cytoplasm [GO:0048471];"cytoplasm [GO:0005737]	transcription regulatory region DNA binding [GO:0044212]";"sequence-specific DNA binding [GO:0043565]	14	14	39.2	51.601	0	137.12	4878900000	133	3.14377	0.00750751	0.317837	-0.221266	2.15862	-1.38318	0.35346	0.210985	0.0554177	-0.0188808	0.317837	-0.221266	1.97322	1.16192
27.1846	29.4738	27.2339	27.9218	27.8891	27.2076	28.0363	28.6447	27.7796	28.2572	27.9749	27.1669	27.524	NaN	26.1322	26.2275	27.8509	26.0822	23.1956	28.397	26.1114	Protein tweety homolog;Protein tweety-2	CG3638	508		chloride transport [GO:0006821]	plasma membrane [GO:0005886]";"chloride channel complex [GO:0034707];chloride channel complex [GO:0034707]	intracellular calcium activated chloride channel activity [GO:0005229];volume-sensitive chloride channel activity [GO:0072320]";"chloride channel activity [GO:0005254];chloride channel activity [GO:0005254]	8	8	6.6	134.77	0	12.254	2345300000	36	0.734953	0.24948	0.886758	1.91714	0.195537	0.818846	0.590289	1.50969	0.669125	2.2522	0.886758	1.91714	0.88032	1.09829
32.4047	32.2618	32.0199	32.1189	32.0814	31.9379	31.7548	31.946	31.5917	32.1914	32.3119	32.2841	31.9877	31.9709	31.9616	32.2209	32.1716	32.0598	32.1389	32.257	32.1123	Mitochondrial import inner membrane translocase subunit TIM50-C	ttm50	509		mitochondrion organization [GO:0007005];protein dephosphorylation [GO:0006470];protein import into mitochondrial matrix [GO:0030150]";"mitochondrial membrane organization [GO:0007006]	mitochondrial inner membrane [GO:0005743];mitochondrion [GO:0005739];nuclear speck [GO:0016607];TIM23 mitochondrial import inner membrane translocase complex [GO:0005744]";"integral component of membrane [GO:0016021];TIM23 mitochondrial import inner membrane translocase complex [GO:0005744]	protein serine/threonine phosphatase activity [GO:0004722];protein tyrosine phosphatase activity [GO:0004725];protein tyrosine phosphatase activity [GO:0004725]";ribonucleoprotein complex binding [GO:0043021]";"mitochondrial protein-transporting ATPase activity [GO:0008566];"phosphoprotein phosphatase activity [GO:0004721]	26	25	54.4	49.671	0	323.31	53987000000	578	1.70971	0.125202	0.113062	-0.0319592	0.10284	-0.0186399	0.201336	-0.0514895	1.65479	-0.405252	0.113062	-0.0319592	0.0440022	-0.0133193
31.3282	31.5527	31.0148	31.4369	31.7824	31.7016	31.297	31.467	31.598	31.5039	31.3348	31.4676	31.5446	31.2745	30.8579	31.0917	30.8089	31.7181	31.0113	30.8572	31.1446		fbp	510		fructose 6-phosphate metabolic process [GO:0006002];fructose metabolic process [GO:0006000];gluconeogenesis [GO:0006094];sucrose biosynthetic process [GO:0005986]";"fructose 1,6-bisphosphate metabolic process [GO:0030388]	cytosol [GO:0005829]";"cytoplasm [GO:0005737]	fructose 1,6-bisphosphate 1-phosphatase activity [GO:0042132]	16	16	50.3	34.849	0	323.31	32193000000	357	0.707487	0.359892	1.48891	0.465095	0.290352	0.201895	1.08466	0.326209	1.69479	0.449638	1.48891	0.465095	0.504912	0.2632
35.3766	35.0263	35.5135	35.3037	34.5908	35.169	35.1431	35.282	35.5271	35.0598	34.3445	35.0592	34.5658	35.0211	34.8675	34.6916	34.2529	35.4981	35.3563	34.9266	35.2384	Protein NASP homolog	CG8223	511		DNA replication-dependent nucleosome assembly [GO:0006335]";"CENP-A containing nucleosome assembly [GO:0034080]	nucleus [GO:0005634]";"nucleoplasm [GO:0005654]	histone binding [GO:0042393]	33	33	68.9	51.89	0	323.31	447700000000	1906	0.690293	0.345617	0.0167609	-0.0104593	0.392678	-0.359587	0.934747	-0.354129	0.349902	0.143598	0.0167609	-0.0104593	0.53017	0.349128
33.9138	34.4335	34.6543	33.7611	33.7407	34.3149	34.21	34.4579	34.6218	33.9351	33.3787	33.7842	34.3624	34.4932	34.2449	34.5042	34.0813	34.9159	33.9497	34.2173	34.2303	Protein lingerer	lig;lig-RA	512		dorsal/ventral axis specification, ovarian follicular epithelium [GO:0008069];male mating behavior [GO:0060179];negative regulation of imaginal disc growth [GO:0045571];negative regulation of JAK-STAT cascade [GO:0046426];positive regulation of transcription, DNA-templated [GO:0045893]";"copulation [GO:0007620]	nucleus [GO:0005634];P-body [GO:0000932]";"cytoplasm [GO:0005737]		28	28	32.8	127.51	0	323.31	216310000000	1013	0.465881	0.48972	0.00563081	0.00396283	0.64506	0.368061	0.14927	-0.0993443	0.922676	0.297488	0.00563081	0.00396283	0.634607	-0.364098
26.4764	NaN	25.9955	NaN	25.1693	25.0661	25.6625	25.5806	24.771	NaN	26.1113	25.1885	NaN	25.1115	24.8971	25.1828	25.2687	25.6812	26.1486	25.1145	25.4829	Putative lipoyltransferase 2, mitochondrial	CG9804	513		protein lipoylation [GO:0009249]	mitochondrion [GO:0005739]	octanoyl transferase activity (acting on glycine-cleavage complex H protein) [GO:0102555]";"lipoyl(octanoyl) transferase activity [GO:0033819]	6	6	30.8	26.033	0	8.7173	427660000	26	0.0670138	0.893938	0.0710355	0.0948375	0.23692	-0.204405	0.253355	-0.254864	0.23023	-0.243952	0.0710355	0.0948375	0.293962	0.299242
28.6321	28.5779	28.1324	28.0757	28.6678	28.2092	26.6935	27.1821	24.4122	28.0397	28.0856	28.6928	27.6464	27.6532	28.5682	28.7595	28.6997	28.626	28.7146	28.3912	28.4295			514	+	proteolysis [GO:0006508];response to fungus [GO:0009620]";"melanization defense response [GO:0035006]		metal ion binding [GO:0046872];serine-type endopeptidase activity [GO:0004252]";"endopeptidase activity [GO:0004175]	15	14	53.8	44.938	0	142.98	3710600000	141	3.4516	0.00365297	0.313969	-0.129256	0.774264	0.183298	0.725109	-0.397443	1.31598	-2.41586	0.313969	-0.129256	1.00547	-0.312554
30.3884	29.8607	29.7733	30.0527	29.9921	30.004	29.84	29.8452	29.8833	29.2104	30.433	29.5511	29.7535	29.6196	29.2311	30.3506	31.0857	30.5871	29.7115	30.1569	30.2334	Protein downstream neighbor of son homolog	hd	515	+	cell proliferation [GO:0008283];eggshell chorion gene amplification [GO:0007307];multicellular organism development [GO:0007275];nuclear DNA replication [GO:0033260]";"cell division [GO:0051301]	nucleus [GO:0005634]		21	21	44.2	63.437	0	137.62	12359000000	251	2.20379	0.0345225	0.0469646	-0.0220791	1.11165	0.640505	0.685154	-0.400827	0.471841	-0.177794	0.0469646	-0.0220791	1.99298	-0.662584
31.6329	31.7591	31.6523	31.8537	32.1142	31.5094	31.2766	31.4298	30.9784	31.8994	31.7697	31.7754	31.9007	31.7722	31.6751	31.4699	31.5721	31.561	31.2955	31.6608	31.3006		CRAT	516	+	fatty acid beta-oxidation [GO:0006635]";"carnitine metabolic process, CoA-linked [GO:0019254]	peroxisome [GO:0005777]";"nucleoplasm [GO:0005654]	carnitine O-acetyltransferase activity [GO:0004092]	44	41	69	72.015	0	323.31	41982000000	785	2.96138	0.0214281	1.22151	0.334622	0.388359	0.115363	2.28983	0.379777	0.458715	-0.1907	1.22151	0.334622	0.881048	0.219259
28.2479	29.0028	28.7066	28.43	28.0269	27.7467	28.6977	28.7866	27.9693	28.4445	28.7635	27.9158	28.2789	28.334	28.6094	28.8773	28.639	27.9588	29.0124	28.1268	28.0219	Nuclear receptor-binding protein homolog	Madm	517		intestinal stem cell homeostasis [GO:0036335];intracellular signal transduction [GO:0035556];protein phosphorylation [GO:0006468];protein secretion [GO:0009306];regulation of cell proliferation [GO:0042127];regulation of cell size [GO:0008361]";"ER to Golgi vesicle-mediated transport [GO:0006888]	cytoplasm [GO:0005737];cytosol [GO:0005829];endomembrane system [GO:0012505];Golgi apparatus [GO:0005794]";"cell cortex [GO:0005938]	protein homodimerization activity [GO:0042803];protein kinase activity [GO:0004672]";protein serine/threonine kinase activity [GO:0004674]";"ATP binding [GO:0005524]	17	17	32.5	70.507	0	51.005	4158000000	111	0.0049945	0.995386	0.0271475	-0.0268854	0.0891089	0.104643	0.00492415	0.00395838	0.0848746	0.097503	0.0271475	-0.0268854	0.155474	-0.131528
27.4235	27.9042	27.2122	28.6178	28.2398	27.4431	27.2888	27.1089	27.2208	27.4362	27.3707	26.9352	27.1449	26.8544	27.0497	29.2178	26.1445	25.5131	27.2001	27.632	26.9083	Protein-methionine sulfoxide oxidase Mical	Mical	518		actin filament organization [GO:0007015];actin modification [GO:0030047];axon guidance [GO:0007411];dendrite morphogenesis [GO:0048813];neuron remodeling [GO:0016322];oxidation-reduction process [GO:0055114];regulation of neuron remodeling [GO:1904799];sarcomere organization [GO:0045214];skeletal muscle thin filament assembly [GO:0030240];synapse assembly involved in innervation [GO:0060386]";"ac…	terminal bouton [GO:0043195]";"cytosol [GO:0005829]	FAD binding [GO:0071949];metal ion binding [GO:0046872];oxidoreductase activity [GO:0016491]";oxidoreductase activity, acting on paired donors, with incorporation or reduction of molecular oxygen, NAD(P)H as one donor, and incorporation of one atom of oxygen [GO:0016709]";"actin binding [GO:0003779];"metal ion binding [GO:0046872]	29	29	7.2	521.23	0	18.604	2179900000	65	0.284478	0.59861	0.80263	0.559952	0.0880581	-0.288329	0.239753	-0.114971	0.0653223	-0.0406367	0.80263	0.559952	0.476716	0.848282
34.9626	34.9525	34.6575	35.018	34.9556	35.1975	34.8063	34.8899	34.9093	34.8569	34.5855	34.9476	34.7529	35.2676	35.1625	35.1212	34.8463	34.8296	35.0312	35.0075	34.9776		Fmr1	519				RNA binding [GO:0003723]	53	0	71.7	75.818	0	323.31	391890000000	1761	0.0375408	0.963192	0.181207	-0.0481415	0.311472	-0.0730883	0.200226	-0.0765998	1.75268	-0.136962	0.181207	-0.0481415	0.0744189	0.0249468
35.8132	35.3562	35.5616	35.8633	35.3829	35.6611	35.9576	35.6595	35.7208	35.1862	34.8363	35.1106	35.4783	35.8078	35.7488	35.1648	34.9391	34.9906	36.1703	35.7046	35.8913	Translationally-controlled tumor protein homolog	Tctp	520	+	double-strand break repair [GO:0006302];intra-S DNA damage checkpoint [GO:0031573];mitotic G2 DNA damage checkpoint [GO:0007095];positive regulation of cell size [GO:0045793];positive regulation of histone phosphorylation [GO:0033129];positive regulation of multicellular organism growth [GO:0040018];regulation of stem cell differentiation [GO:2000736]";"cellular response to gamma radiation [GO:00…	cytoplasmic microtubule [GO:0005881];nucleus [GO:0005634];plasma membrane [GO:0005886];polytene chromosome [GO:0005700]";"cytoplasm [GO:0005737]	guanyl-nucleotide exchange factor activity [GO:0005085]";"calcium ion binding [GO:0005509]	27	27	100	19.637	0	323.31	647430000000	2081	2.28084	0.0349933	1.09109	-0.315661	2.37755	-0.89054	1.25085	-0.56075	0.36593	-0.142755	1.09109	-0.315661	2.42916	0.574879
30.079	30.2385	30.1725	30.1075	29.7508	29.9933	29.1568	29.5146	29.3469	29.5541	29.7715	29.6423	30.0453	28.9709	29.6403	29.7057	29.303	29.6032	30.1454	29.9811	29.9993	CCR4-NOT transcription complex subunit 10	Not10	521	+	mRNA catabolic process [GO:0006402];negative regulation of translation [GO:0017148]";"gene silencing by RNA [GO:0031047]	cytoplasm [GO:0005737];nucleus [GO:0005634]";"CCR4-NOT complex [GO:0030014]		21	21	41.9	69.692	0	309.87	10595000000	256	2.65133	0.0223976	0.0489545	0.0150099	1.73244	-0.504648	1.09296	-0.437874	2.4297	-0.702513	0.0489545	0.0150099	2.29214	0.519657
29.096	30.6598	30.137	29.076	30.145	29.777	29.8778	30.7409	29.3533	28.0237	30.4018	29.3048	29.7697	29.0355	28.9125	30.0724	30.5223	29.4173	29.6226	30.3415	29.354	Histone deacetylase complex subunit SAP18	Bin1	522		mRNA splicing, via spliceosome [GO:0000398];multicellular organism development [GO:0007275];negative regulation of transcription, DNA-templated [GO:0045892]";"chromatin silencing [GO:0006342];transcription, DNA-templated [GO:0006351]	cytoplasm [GO:0005737];precatalytic spliceosome [GO:0071011];Sin3 complex [GO:0016580]";"catalytic step 2 spliceosome [GO:0071013]	transcription factor binding [GO:0008134]";"transcription corepressor activity [GO:0003714]	8	8	50	17.287	0	42.744	10268000000	123	0.371946	0.520627	0.0348288	0.0424776	0.205096	0.231313	0.467505	-0.531352	0.163881	0.217981	0.0348288	0.0424776	0.170736	-0.188835
27.8784	27.2279	26.5869	27.0947	27.7958	26.7204	25.7395	25.7139	26.0895	27.1772	26.3132	25.2682	27.5554	26.0494	26.2894	28.0352	27.6132	27.1397	26.7419	26.8199	24.9665			523		multicellular organism reproduction [GO:0032504]	extracellular space [GO:0005615]		10	10	38.6	29.545	0	9.5209	1250100000	38	1.69784	0.0536815	1.09636	1.04125	1.01241	1.41991	0.164111	0.26603	0.205656	-0.328475	1.09636	1.04125	0.481373	-0.378657
28.9854	28.727	28.069	28.3158	27.6695	25.6754	28.6834	28.4701	27.4147	29.1158	28.4699	28.8741	28.3151	28.3304	28.4102	28.7524	28.8473	29.025	28.3006	28.2976	27.773	Nucleolar protein 14 homolog	l(3)07882	524		rRNA processing [GO:0006364]";"ribosomal small subunit biogenesis [GO:0042274]	nucleolus [GO:0005730];small-subunit processome [GO:0032040]";"Noc4p-Nop14p complex [GO:0030692];small-subunit processome [GO:0032040]	snoRNA binding [GO:0030515]	25	25	32.6	97.55	0	167.84	4101000000	155	0.437012	0.459913	0.112348	-0.216693	1.75523	0.751177	1.08177	0.462219	0.0526191	0.0656865	0.112348	-0.216693	0.664809	-0.96787
26.3373	NaN	NaN	26.411	NaN	NaN	25.0261	NaN	NaN	25.0083	25.2341	24.9821	25.273	24.7436	24.7033	24.9378	NaN	NaN	25.6577	25.5463	25.2675			525	+				3	3	33	10.76	0.0078419	1.3709	321510000	12	3.81196	0.00473408	1.99182	0.883627	0	-0.552666	1.76172	-0.499752	0	-0.464347	1.99182	0.883627	0	1.43629
24.1444	24.7003	NaN	25.7618	25.1315	NaN	NaN	NaN	NaN	25.9446	25.0229	26.1287	23.3361	25.5712	23.9663	24.2497	NaN	NaN	NaN	NaN	NaN			526					2	2	10.2	20.706	0.0052919	1.6706	313270000	10	0.0331851	0.942062	0	NaN	0	NaN	0	NaN	-4.34294e-08	0	0	NaN	0	0.684758
27.5362	26.6756	26.2963	28.6555	28.4347	28.3402	29.0935	29.2593	28.5643	28.8083	28.7403	28.7356	29.1272	29.2153	28.8836	27.9811	28.4115	28.7952	28.6793	28.9554	28.5298			527	+	cell differentiation [GO:0030154];cell division [GO:0051301];mitotic chromosome movement towards spindle pole [GO:0007079];mitotic spindle elongation [GO:0000022];nervous system development [GO:0007399];positive regulation of microtubule depolymerization [GO:0031117];protein hexamerization [GO:0034214];regulation of synapse structure or activity [GO:0050803]";"adult locomotory behavior [GO:000834…	chromosome [GO:0005694];cytoplasm [GO:0005737];integral component of membrane [GO:0016021];lipid droplet [GO:0005811];microtubule [GO:0005874];spindle [GO:0005819]";"centrosome [GO:0005813]	microtubule binding [GO:0008017];microtubule-severing ATPase activity [GO:0008568]";"ATP binding [GO:0005524]	25	1	51.9	60.651	0	165.48	4843100000	176	1.80083	0.0473086	0.929435	-1.06506	0.540066	-0.325552	0.651927	0.196913	0.441636	0.250859	0.929435	-1.06506	0.575834	-0.739508
29.762	29.5028	29.3583	28.4291	28.893	28.147	29.4917	29.5216	29.2519	30.1089	29.9385	30.3171	29.7299	28.3646	28.9877	30.0733	29.9056	29.2428	29.5385	29.1616	29.2458	Serendipity locus protein alpha	Sry-alpha	528		actomyosin contractile ring assembly [GO:0000915];cellularization [GO:0007349]";"actin filament organization [GO:0007015];cellularization [GO:0007349]	cytosol [GO:0005829];membrane [GO:0016020]";plasma membrane [GO:0005886]";"cleavage furrow [GO:0032154];"cytoplasm [GO:0005737]	actin binding [GO:0003779]	22	22	47.2	59.384	0	323.31	8318800000	176	0.396023	0.509097	0.333129	-0.299958	0.696862	0.425222	0.232332	0.259107	0.303628	0.106398	0.333129	-0.299958	0.906368	-0.725181
28.8411	29.7401	27.9479	28.9019	28.6169	28.0773	28.9334	28.6727	28.9745	29.3444	29.2144	29.2425	29.5018	28.1428	28.1744	27.5427	28.7565	28.2334	28.742	29.1277	28.0122	Serendipity locus protein beta	Sry-beta	529		multicellular organism development [GO:0007275]	polytene chromosome interband [GO:0005705]";"nucleus [GO:0005634]	metal ion binding [GO:0046872]";"DNA binding [GO:0003677];nucleic acid binding [GO:0003676]	17	17	46.1	41.708	0	57.783	4162000000	98	0.323906	0.574243	0.0479066	0.0602611	0.395825	-0.449753	0.311057	0.309441	0.274556	0.232944	0.0479066	0.0602611	0.530132	0.510015
30.8259	30.7647	30.24	30.9874	30.8258	30.7695	29.9649	30.3734	30.0956	29.7341	30.7104	29.8929	31.1576	30.5327	30.6151	30.1769	30.5952	30.5058	30.1127	30.6881	30.8754			530		retrograde vesicle-mediated transport, Golgi to ER [GO:0006890]";"protein retention in ER lumen [GO:0006621]	integral component of Golgi membrane [GO:0030173]";"endoplasmic reticulum [GO:0005783]		8	2	33.6	29.576	0	125.03	20480000000	194	0.530115	0.436766	0.359832	0.176793	0.194235	-0.132789	0.12662	-0.118293	0.732157	-0.414143	0.359832	0.176793	0.92591	0.309582
28.1711	28.1914	28.661	28.0291	28.1529	26.9788	27.8709	27.1258	26.5572	29.025	28.867	28.6125	28.2485	28.2683	26.2184	26.4198	26.4706	28.0072	28.1157	28.1679	26.1467			531			centrosome [GO:0005813]	ligase activity [GO:0016874]	24	24	20.2	194.55	0	166.88	2985200000	93	0.646565	0.310077	0.460228	0.553941	0.238069	-0.510902	0.439872	0.729831	0.141196	-0.292101	0.460228	0.553941	1.2149	1.06484
34.9317	34.9923	35.3359	34.8951	34.7699	35.2535	34.8172	34.8416	34.7944	34.9428	34.5352	34.9795	35.1272	35.6066	34.8423	35.1378	34.8627	35.1913	34.8972	34.7808	34.7721	Proteasome subunit beta type	Prosbeta1	532		proteasomal ubiquitin-independent protein catabolic process [GO:0010499];proteasome-mediated ubiquitin-dependent protein catabolic process [GO:0043161]";"proteasomal protein catabolic process [GO:0010498]	nucleus [GO:0005634];proteasome complex [GO:0000502];proteasome core complex [GO:0005839];proteasome core complex, beta-subunit complex [GO:0019774]";"cytoplasm [GO:0005737]	threonine-type endopeptidase activity [GO:0004298]";"endopeptidase activity [GO:0004175]	18	18	84.8	24.264	0	323.31	367980000000	1785	0.279232	0.689825	0.809473	0.213044	1.06099	0.247253	0.391805	0.188898	0.00829674	0.00107447	0.809473	0.213044	0.0847708	-0.0342096
24.1334	NaN	NaN	23.2361	NaN	NaN	NaN	NaN	NaN	24.4428	NaN	NaN	NaN	NaN	NaN	NaN	NaN	NaN	NaN	NaN	NaN			533					2	2	27.9	10.035	0.0073783	1.4428	53595000	2	NaN	NaN	0	NaN	-4.34294e-08	0	0	NaN	-4.34294e-08	0	0	NaN	0	NaN
29.7318	NaN	NaN	26.7074	30.0291	29.2773	28.0258	NaN	24.1088	27.1414	27.1203	26.2488	29.1551	29.1019	28.9224	NaN	27.2872	NaN	NaN	28.273	26.8729		CG34242-RA	534		mitochondrial respiratory chain complex IV assembly [GO:0033617]	mitochondrial inner membrane [GO:0005743]";"integral component of membrane [GO:0016021]		2	2	29.3	6.7259	0.0018543	2.2839	3142200000	29	0.598248	0.316126	0.488001	1.36343	0	-0.285781	0.143013	0.375368	0.264139	-1.50566	0.488001	1.36343	0	1.64921
30.7458	31.163	30.8867	30.1722	30.8101	30.849	30.4187	30.6505	30.1211	30.3934	30.5797	30.3671	30.7409	30.4203	30.9344	31.0977	31.2289	30.8083	30.7697	30.5015	30.3641	Uncharacterized protein CG4951	CG4951	535					28	28	59.4	50.753	0	323.31	19016000000	356	1.26482	0.156975	0.497469	0.226001	1.35716	0.49985	0.0628394	0.0275033	0.312237	-0.148333	0.497469	0.226001	0.626135	-0.273849
32.7884	32.8478	33.1678	32.2551	32.2323	32.7542	32.281	32.1572	32.3308	32.503	32.685	32.4646	32.0496	32.1596	31.9382	32.8981	32.5755	32.3566	32.4057	32.3427	32.2959		Nup75	536		positive regulation of transcription, DNA-templated [GO:0045893];protein import into nucleus [GO:0006606];regulation of terminal button organization [GO:2000331]";"mRNA export from nucleus [GO:0006406]	nuclear pore outer ring [GO:0031080]";"nuclear membrane [GO:0031965]	structural constituent of nuclear pore [GO:0017056]	47	47	69	76.871	0	323.31	69588000000	853	0.881844	0.273369	0.745624	0.32618	0.750005	0.262	0.100696	-0.0480919	0.688526	-0.0917142	0.745624	0.32618	0.0982147	0.0641797
NaN	28.5645	27.5707	NaN	NaN	NaN	27.1157	NaN	29.205	27.6478	27.5802	28.1348	28.3525	NaN	27.7519	28.0484	27.4964	NaN	NaN	NaN	NaN			537		chromatin remodeling [GO:0006338]	Ino80 complex [GO:0031011]		5	5	26.7	32.216	0	9.6068	2499400000	12	0.0298904	0.94809	0	NaN	0	NaN	0	NaN	0	NaN	0	NaN	0.183531	0.295137
26.278	27.1596	25.75	28.2827	27.9336	26.1725	25.8092	25.8763	NaN	25.6949	25.3971	25.3537	25.8241	24.8785	26.5566	24.5349	NaN	NaN	24.8306	24.7722	24.5684		laccase2	538	+	chitin-based cuticle development [GO:0040003]	extracellular space [GO:0005615]	hydroquinone:oxygen oxidoreductase activity [GO:0052716];hydroquinone:oxygen oxidoreductase activity [GO:0052716]";oxidoreductase activity, oxidizing metal ions [GO:0016722]";"copper ion binding [GO:0005507]	11	11	16.4	82.68	0	43.552	755790000	32	2.28579	0.0218622	2.04597	2.20565	0	-0.188882	1.46153	0.893753	2.74536	1.119	2.04597	2.20565	0	2.39453
NaN	26.3543	NaN	26.7613	26.5776	25.8754	23.171	25.5609	26.1057	NaN	26.7546	26.9793	26.5873	26.4361	25.5831	NaN	26.1113	25.8574	24.5978	26.263	26.963		CG17508-RA	539			integral component of membrane [GO:0016021]		3	3	11.5	35.184	0	10.049	691450000	14	0.624816	0.314168	0.296196	0.45086	0.0153485	0.0430314	0.380793	0.526797	0.363892	-0.995431	0.296196	0.45086	0.616163	0.407828
29.2741	29.4067	27.4251	29.0027	28.9697	28.6427	28.9473	29.5443	28.777	29.3254	29.6814	28.4449	29.2533	28.9621	29.1093	27.6771	28.745	28.8394	28.942	29.1232	27.3601			540		phosphorylation [GO:0016310]	cytoplasm [GO:0005737]		22	22	35.6	77.85	0	179.27	5754600000	127	0.364503	0.530738	0.223398	0.311712	0.0272482	-0.0546163	0.738878	0.65431	0.433882	0.614424	0.223398	0.311712	0.316868	0.366329
24.7816	26.9044	26.339	24.3926	27.4958	25.4418	26.3748	NaN	27.1037	27.2348	25.7483	25.1672	25.1814	26.3559	26.6544	27.4826	25.6724	NaN	25.2253	25.8637	26.0243		kune	541		regulation of tube length, open tracheal system [GO:0035159];septate junction assembly [GO:0019991]";"establishment of glial blood-brain barrier [GO:0060857]	pleated septate junction [GO:0005919];septate junction [GO:0005918]";"integral component of membrane [GO:0016021]		3	3	10.6	29.78	0	17.531	886000000	12	0.144986	0.761246	0.0921904	0.188091	0.487334	0.87307	0.281766	0.35255	1.05231	1.03481	0.0921904	0.188091	0.282683	-0.684979
31.3491	31.2328	31.1862	31.006	31.0452	31.0707	30.8561	30.8743	30.9445	30.8182	30.929	30.9306	30.8853	31.1564	31.0046	31.2559	31.2164	31.5112	30.7679	30.8473	30.8673			542	+	protein processing [GO:0016485];protein processing involved in protein targeting to mitochondrion [GO:0006627];proteolysis [GO:0006508]";"peptide metabolic process [GO:0006518]	mitochondrion [GO:0005739]";"mitochondrial matrix [GO:0005759]	metalloendopeptidase activity [GO:0004222]";"metal ion binding [GO:0046872]	44	44	70	80.235	0	323.31	24151000000	531	3.64555	0.0148395	2.26932	0.320808	2.16965	0.500307	0.90617	0.126477	0.722696	0.0641015	2.26932	0.320808	0.948962	-0.179499
33.965	34.0364	34.2262	34.0721	33.941	34.1082	33.6041	33.3705	33.5101	34.3667	34.2753	34.4513	34.0895	34.1595	34.2407	33.9987	33.8908	34.2643	34.0777	33.8502	33.9442		Gp210	543	+	protein import into nucleus [GO:0006606]";"nuclear pore organization [GO:0006999]	integral component of membrane [GO:0016021];nuclear pore [GO:0005643];nuclear pore inner ring [GO:0044611];nuclear pore nuclear basket [GO:0044615];nuclear pore transmembrane ring [GO:0070762]";"cytoplasm [GO:0005737]		95	95	55.8	209.79	0	323.31	204730000000	2019	5.0364	0.00219108	0.649794	0.100787	0.294749	0.0939064	1.94131	0.306469	2.09023	-0.462482	0.649794	0.100787	0.0247631	0.00688108
32.8957	32.9148	33.1117	32.7907	32.6888	32.7027	32.7688	32.8676	32.9698	32.9206	33.0576	33.0024	32.8445	33.0071	33.0961	33.1042	33.0909	33.2858	32.8474	32.7161	32.6247		BubR1	544		male meiosis sister chromatid cohesion [GO:0007065];male meiotic nuclear division [GO:0007140];meiotic sister chromatid cohesion, centromeric [GO:0051754];mitotic spindle assembly checkpoint [GO:0007094];positive regulation of chromatin silencing [GO:0031937];protein phosphorylation [GO:0006468];regulation of exit from mitosis [GO:0007096];regulation of mitotic sister chromatid separation [GO:001…	condensed nuclear chromosome kinetochore [GO:0000778];cytoplasm [GO:0005737];kinetochore [GO:0000776]";"condensed chromosome outer kinetochore [GO:0000940]	protein kinase activity [GO:0004672]";"ATP binding [GO:0005524]	81	81	54.6	165.06	0	323.31	90263000000	1217	2.37006	0.0681272	0.551497	0.121377	2.05667	0.430957	2.13397	0.25868	0.735536	0.139364	0.551497	0.121377	1.69631	-0.30958
24.884	25.9198	NaN	NaN	NaN	NaN	24.0386	25.2119	25.3548	NaN	NaN	24.5127	27.7025	25.0606	NaN	NaN	26.0181	25.895	24.1019	NaN	NaN		SCAP	546		protein processing [GO:0016485];sterol regulatory element binding protein cleavage [GO:0035103]";"cholesterol metabolic process [GO:0008203]	Golgi membrane [GO:0000139];integral component of membrane [GO:0016021]";"endoplasmic reticulum membrane [GO:0005789]	cholesterol binding [GO:0015485]	5	5	4.9	142.49	0.0059337	1.5676	228880000	10	0.154	0.742998	0	1.30004	0	1.85466	0	1.65672	0	0.766524	0	1.30004	0.399039	-0.554626
28.9001	28.9526	28.482	29.0227	28.4669	27.9483	29.0312	29.1503	28.8091	29.2491	29.2177	28.5756	28.9918	28.1248	28.3183	27.3602	28.8942	28.873	29.1984	28.871	28.3388		Tbce	547		nervous system development [GO:0007399];neuromuscular synaptic transmission [GO:0007274];regulation of synaptic growth at neuromuscular junction [GO:0008582]";"microtubule polymerization [GO:0046785]	cytoplasm [GO:0005737]		22	22	47.2	59.423	0	154.54	4512700000	127	0.201877	0.714369	0.240886	-0.173987	0.307324	-0.426952	0.0613903	-0.0565465	0.291183	0.194115	0.240886	-0.173987	0.2519	0.252965
34.0384	34.2049	34.1715	34.0695	34.2842	33.9483	34.1884	34.1802	34.0869	34.2543	34.2183	34.1161	33.9117	33.7066	34.0851	34.3228	34.0357	34.1819	34.5266	34.4084	34.1215		Trap1	548		mitochondrial unfolded protein response [GO:0034514];positive regulation of response to oxidative stress [GO:1902884];protein folding [GO:0006457];response to heat [GO:0009408];response to oxidative stress [GO:0006979]";"cellular response to heat [GO:0034605]	mitochondrial inner membrane [GO:0005743];mitochondrial matrix [GO:0005759];mitochondrion [GO:0005739];nucleus [GO:0005634]";"extracellular exosome [GO:0070062]	ATP binding [GO:0005524];protein kinase binding [GO:0019901];RNA binding [GO:0003723];unfolded protein binding [GO:0051082]";"ATPase activity [GO:0016887]	56	56	71.8	77.962	0	323.31	208670000000	1391	0.758083	0.416073	1.17058	-0.232698	0.516749	-0.172024	1.11516	-0.303465	0.737004	-0.200319	1.17058	-0.232698	0.277616	-0.0606747
31.395	31.469	30.9907	30.5445	30.898	30.8672	30.9195	31.3246	30.9775	31.0432	31.0068	30.7614	31.0704	30.9863	31.1828	31.7359	31.3324	31.2386	30.7681	30.9315	30.8824		Bap170	549		imaginal disc-derived wing margin morphogenesis [GO:0008587];imaginal disc-derived wing vein morphogenesis [GO:0008586];negative regulation of chromatin silencing [GO:0031936];negative regulation of epidermal growth factor receptor signaling pathway [GO:0042059];positive regulation of transcription, DNA-templated [GO:0045893];protein stabilization [GO:0050821]";"imaginal disc-derived leg morphoge…	polytene chromosome [GO:0005700];RSC-type complex [GO:0016586]";"brahma complex [GO:0035060]	DNA binding [GO:0003677]	46	46	31.6	183.03	0	323.31	24635000000	529	1.0173	0.236886	0.34239	0.166738	1.63989	0.574962	0.851178	0.147799	0.720156	0.213235	0.34239	0.166738	0.919162	-0.408224
30.5543	30.4826	30.3361	30.7793	30.698	30.6075	30.4863	30.8834	30.4528	31.226	31.0826	31.0039	30.808	30.7671	30.6946	31.475	31.1458	30.4971	30.9482	30.7263	30.8916		Dpit47	550			nucleus [GO:0005634]		26	26	48	46.906	0	256.15	23127000000	350	1.22839	0.171448	1.50832	-0.279085	0.246772	0.183963	0.233168	0.0749922	0.74082	-0.247885	1.50832	-0.279085	1.19691	-0.463048
29.4693	28.806	29.5341	27.8212	29.1952	27.9115	29.4903	30.0496	29.0857	29.0228	28.193	28.1023	28.5897	27.1665	28.665	28.0297	28.8681	NaN	30.4714	29.0857	28.859		koi	551		nuclear migration [GO:0007097];nucleus localization [GO:0051647]";"double-strand break repair via homologous recombination [GO:0000724]	nuclear periphery [GO:0034399];perinuclear region of cytoplasm [GO:0048471]";"integral component of membrane [GO:0016021]		21	8	47.9	51.754	0	70.35	4800800000	62	1.04673	0.154727	0.579081	-0.682474	0.599753	-1.02311	1.28004	-1.18212	0.0412526	0.0698363	0.579081	-0.682474	0.228494	0.340641
32.6121	32.5971	32.7427	32.3807	32.2609	32.4162	32.1212	32.0324	32.5715	32.727	32.3332	32.8289	31.8984	32.2478	32.1059	32.204	31.8041	32.1919	32.404	31.6312	32.0339		vimar	552		positive regulation of GTPase activity [GO:0043547];positive regulation of neuron death [GO:1901216];rhabdomere development [GO:0042052]";"muscle cell cellular homeostasis [GO:0046716]	plasma membrane [GO:0005886]";"cytosol [GO:0005829]		36	1	60.6	70.253	0	323.31	62973000000	606	0.815093	0.300992	1.47951	0.478578	0.0582915	0.0436198	0.620632	0.333833	0.321889	0.21863	1.47951	0.478578	1.80667	0.434958
NaN	NaN	NaN	NaN	24.0163	NaN	NaN	NaN	NaN	NaN	NaN	NaN	NaN	NaN	NaN	NaN	NaN	NaN	NaN	NaN	NaN		vimar	553		positive regulation of GTPase activity [GO:0043547];positive regulation of neuron death [GO:1901216];rhabdomere development [GO:0042052]";"muscle cell cellular homeostasis [GO:0046716]	plasma membrane [GO:0005886]";"cytosol [GO:0005829]		36	1	60.6	70.324	0.0041542	1.8307	5792300	1	NaN	NaN	0	NaN	-4.34294e-08	0	-4.34294e-08	0	-4.34294e-08	0	0	NaN	0	NaN
30.5974	31.0883	29.5499	30.5103	30.2966	30.2416	30.3106	30.2116	30.2615	30.1804	29.9568	29.9809	30.6336	30.7638	30.8126	30.7115	30.9593	30.7995	30.2325	30.6039	30.6574		Spn43Ab	554		negative regulation of endopeptidase activity [GO:0010951]";"multicellular organism reproduction [GO:0032504]	extracellular space [GO:0005615]	serine-type endopeptidase inhibitor activity [GO:0004867]	20	20	64.1	43.378	0	251.53	16783000000	237	0.389525	0.547889	0.142227	-0.117217	1.00453	0.325525	0.170699	-0.109892	0.800604	-0.236672	0.142227	-0.117217	0.717922	-0.442742
32.6733	32.2949	32.9615	32.8048	32.44	32.9201	33.1343	32.5111	33.335	32.8889	32.345	33.0804	33.0252	33.196	33.3116	33.0126	31.9994	33.0843	33.3292	32.645	33.3248			555				metal ion binding [GO:0046872]";"lactoylglutathione lyase activity [GO:0004462]	17	17	94.9	20.045	0	323.31	103370000000	659	0.343966	0.585274	1.00947	-0.417258	0.40737	-0.400904	0.197277	-0.125142	0.114601	-0.106201	1.00947	-0.417258	0.0199987	-0.0163536
27.8948	28.6633	28.2513	27.5871	28.3365	27.804	28.4827	28.7963	28.5931	28.3528	27.3467	28.0551	28.6053	28.7153	28.0039	28.6795	28.5367	29.3024	27.7273	28.115	27.543			556		negative regulation of transcription by RNA polymerase II [GO:0000122]";"histone deacetylation [GO:0016575]	nucleus [GO:0005634]";"nucleoplasm [GO:0005654]	histone deacetylase binding [GO:0042826];RNA polymerase II repressing transcription factor binding [GO:0001103];transcription corepressor activity [GO:0003714]";"DNA binding [GO:0003677]	8	2	25.3	63.981	0	320.2	4343700000	95	1.51488	0.0868914	0.526246	0.294396	1.64691	1.04443	0.577535	0.384728	1.90432	0.828906	0.526246	0.294396	1.48347	-0.75003
31.472	31.3977	31.2944	30.7341	30.7315	30.5836	30.3066	30.4109	30.5565	30.9498	30.9997	30.9559	31.2003	30.5733	30.7065	30.274	30.5589	29.9442	30.6772	30.3892	30.4812		didum	557	+	anterior/posterior axis specification, embryo [GO:0008595];intracellular protein transport [GO:0006886];mitochondrion transport along microtubule [GO:0047497];positive regulation of pole plasm oskar mRNA localization [GO:0045856];rhabdomere development [GO:0042052];sperm individualization [GO:0007291]";"actin filament-based movement [GO:0030048]	myosin V complex [GO:0031475];neuronal cell body [GO:0043025];rhabdomere [GO:0016028]";"myosin complex [GO:0016459]	actin filament binding [GO:0051015];actin-dependent ATPase activity [GO:0030898];ATP binding [GO:0005524];ATPase activity, coupled [GO:0042623];calcium-dependent ATPase activity [GO:0030899];calmodulin binding [GO:0005516];motor activity [GO:0003774];myosin light chain binding [GO:0032027]";"actin binding [GO:0003779]	74	74	45.2	207.26	0	323.31	20528000000	505	2.29285	0.033115	1.16238	0.519727	0.581534	-0.256795	1.47506	0.381789	0.337231	-0.0911554	1.16238	0.519727	1.67369	0.776522
26.4956	26.0684	23.9121	25.9695	25.2371	NaN	NaN	NaN	24.2933	25.3084	24.6049	25.0163	25.5758	NaN	24.5389	24.1204	25.6687	25.0446	24.7802	NaN	24.5701		CG2144-RA	558		GPI anchor biosynthetic process [GO:0006506]	integral component of endoplasmic reticulum membrane [GO:0030176]	CP2 mannose-ethanolamine phosphotransferase activity [GO:0051267]	5	5	5	104.59	0	18.979	403630000	12	0.303069	0.582818	0.509742	0.861393	0.16946	0.269393	0.432777	0.333713	0	-0.3818	0.509742	0.861393	0.373805	0.592
31.6839	31.8548	31.5151	31.4714	31.5622	31.2862	31.8347	31.6526	31.569	31.5746	31.5006	31.8031	31.5482	31.7321	31.4275	31.576	31.6952	31.0136	31.3599	31.1385	30.9841		Vps13	559		protein retention in Golgi apparatus [GO:0045053];protein targeting to vacuole [GO:0006623]";"protein metabolic process [GO:0019538]	late endosome membrane [GO:0031902]";"extrinsic component of membrane [GO:0019898]		124	124	41.1	374.54	0	323.31	34952000000	959	1.41117	0.148932	1.67213	0.401399	0.49224	0.267373	2.24576	0.436801	1.75782	0.524581	1.67213	0.401399	0.318707	0.134026
29.7273	29.5621	29.7466	28.3933	28.8524	28.8464	28.7616	28.3644	28.3296	29.4862	29.4376	29.741	29.7582	29.3779	29.2488	28.5415	26.9637	28.052	28.0713	27.2333	27.781			560	+		endomembrane system [GO:0012505]	oxidoreductase activity [GO:0016491]	16	14	50.9	36.581	0	135.01	6058800000	122	3.91904	0.00242945	2.27585	1.49281	0.107684	0.157166	4.36896	1.81307	1.31179	0.789975	2.27585	1.49281	1.6574	1.33564
30.1293	30.5455	30.7889	29.939	29.9012	30.2431	29.872	29.6463	29.7174	29.9078	30.128	29.9239	30.0254	29.6074	29.3532	30.0689	30.4432	28.8363	30.0495	30.0355	29.3251			561		immune response [GO:0006955];negative regulation of immune response [GO:0050777];negative regulation of NIK/NF-kappaB signaling [GO:1901223];response to insecticide [GO:0017085]";"cilium assembly [GO:0060271]	muscle tendon junction [GO:0005927]		40	40	34.3	141.24	0	154.29	11575000000	289	0.515309	0.436906	0.902585	0.45445	0.0125512	-0.0205606	0.0310383	0.0209277	0.082825	-0.0581264	0.902585	0.45445	0.599055	0.475011
28.7629	29.1226	28.6944	29.0992	29.1098	29.0711	29.3911	28.8926	29.2575	29.0453	28.8356	28.6373	29.2576	28.8391	28.7997	29.8435	29.5644	29.1733	29.3881	28.6165	28.925		CG1383	562			nucleoplasm [GO:0005654]";"cytosol [GO:0005829]	RNA adenylyltransferase activity [GO:1990817]	22	22	34	96.542	0	323.31	6664100000	184	1.44668	0.120659	0.000269435	0.000150681	0.86286	0.550552	0.144731	-0.0740811	0.308906	0.203878	0.000269435	0.000150681	1.82021	-0.550402
28.4323	28.2678	27.8555	28.3142	27.9242	27.3623	26.7856	26.2737	25.1406	28.4027	28.4276	27.4647	27.0245	26.1318	27.1253	25.4844	26.9498	25.9997	NaN	26.0586	24.5021		phr	563	+	photoreactive repair [GO:0000719]		deoxyribodipyrimidine photo-lyase activity [GO:0003904]	17	15	34	61.352	0	160.65	1938200000	62	2.95924	0.007225	2.94945	2.74568	0.443452	0.864304	1.53823	2.14908	0.371254	0.786279	2.94945	2.74568	2.86278	1.88138
26.7872	27.37	26.3536	27.073	27.1045	26.8964	27.103	26.529	26.5585	26.5127	27.2548	26.7243	26.9958	26.5909	27.3319	25.8474	26.2125	27.0729	27.1889	26.4336	26.5879			564				tRNA (adenine-N6-)-methyltransferase activity [GO:0016430]	9	6	25.4	43.984	0	13.617	1360100000	39	0.43285	0.506723	0.324983	0.193976	0.346159	-0.359211	0.267857	0.164928	0.00736058	-0.00664393	0.324983	0.193976	0.911541	0.553187
28.5046	28.1671	29.3876	28.1033	27.5548	28.6933	28.9475	28.5145	29.6399	29.6695	28.986	30.6052	28.7085	30.178	29.7505	29.6457	29.0456	29.7889	28.9957	28.9272	29.3134			565			integral component of membrane [GO:0016021]		7	7	44.2	20.984	0	76.47	9443700000	92	1.6282	0.0635618	0.930117	-0.67696	0.74038	0.414626	0.642071	0.570866	0.0438156	-0.0447655	0.930117	-0.67696	1.53189	-1.09159
28.9047	29.7551	29.0586	29.8131	30.882	29.7255	29.1448	30.3581	29.0687	29.5688	29.9762	29.1309	30.6394	28.6485	28.857	28.8176	30.1506	29.3444	28.5953	30.1115	28.8145		rnh1	566		RNA phosphodiester bond hydrolysis, endonucleolytic [GO:0090502]";"DNA replication, removal of RNA primer [GO:0043137]		nucleic acid binding [GO:0003676];RNA-DNA hybrid ribonuclease activity [GO:0004523]";"magnesium ion binding [GO:0000287]	14	14	46.8	35.191	0	123.41	8238900000	193	0.0458122	0.92324	0.449904	0.516064	0.16211	0.263788	0.219873	0.296391	0.215662	0.350128	0.449904	0.516064	0.205963	0.252275
24.3	24.8242	25.6199	25.3432	25.2696	25.3331	24.3878	25.2474	25.118	26.8688	25.3599	25.3353	25.228	NaN	24.8468	26.6475	25.3764	24.6369	NaN	24.364	24.5076		CG8726-RB	567		negative regulation of ion transport [GO:0043271];protein phosphorylation [GO:0006468];regulation of membrane potential [GO:0042391]";"negative regulation of ATPase activity [GO:0032780]	plasma membrane [GO:0005886]";"cytoplasm [GO:0005737]	ATP binding [GO:0005524];phosphatidylinositol binding [GO:0035091]";"actin binding [GO:0003779];"ATP binding [GO:0005524]	8	8	18	71.721	0	22.451	486230000	25	0.529286	0.391525	0.98026	0.6792	0.624046	1.11777	0.921017	1.09193	0.582049	0.481943	0.98026	0.6792	0.409861	-0.438571
33.1418	32.91	33.2223	33.1166	32.7001	32.8949	32.8829	32.661	32.8211	33.1739	32.8342	33.2689	33.0796	33.2099	33.118	32.729	32.6176	32.972	32.9333	32.5304	32.4202		ACC	568		cellular response to sucrose stimulus [GO:0071329];fatty acid biosynthetic process [GO:0006633];glycogen metabolic process [GO:0005977];response to sucrose [GO:0009744];triglyceride biosynthetic process [GO:0019432]";"cell morphogenesis [GO:0000902]	cytoplasm [GO:0005737]	ATP binding [GO:0005524];biotin carboxylase activity [GO:0004075];metal ion binding [GO:0046872]";"acetyl-CoA carboxylase activity [GO:0003989]	121	121	54.4	278.59	0	323.31	99474000000	1587	1.95426	0.0753795	1.30997	0.369642	0.315698	0.1449	2.0307	0.486104	0.400688	0.160328	1.30997	0.369642	0.848658	0.224742
NaN	24.439	NaN	24.7704	25.2579	24.6614	25.7361	26.1588	25.3992	25.9576	24.804	26.8614	25.0461	NaN	25.405	25.7764	25.903	26.0126	27.2291	24.7267	NaN		udd	569		positive regulation of transcription of nucleolar large rRNA by RNA polymerase I [GO:1901838]	RNA polymerase transcription factor SL1 complex [GO:0005668]";"nucleolus [GO:0005730]		3	3	20.1	18.223	0.00085383	2.7064	515950000	10	0.577607	0.352288	0.670757	-1.19574	0.0283301	-0.0806052	0.152247	-0.363098	0.0752635	-0.213229	0.670757	-1.19574	2.47815	-1.11513
[truncated: 5,569 more rows]
[truncated: 41 more columns]

## Sheet: parameter
Parameter	Value
Version	1.5.3.8
User name	hnolte1
Machine name	MAXQUANT-SRV
Date of writing	2018-01-11 06:10:15
Fixed modifications	Carbamidomethyl (C)
Decoy mode	revert
Special AAs	KR
Include contaminants	TRUE
MS/MS tol. (FTMS)	20 ppm
Top MS/MS peaks per 100 Da. (FTMS)	12
MS/MS deisotoping (FTMS)	TRUE
MS/MS tol. (ITMS)	0.5 Da
Top MS/MS peaks per 100 Da. (ITMS)	8
MS/MS deisotoping (ITMS)	FALSE
MS/MS tol. (TOF)	40 ppm
Top MS/MS peaks per 100 Da. (TOF)	10
MS/MS deisotoping (TOF)	TRUE
MS/MS tol. (Unknown)	0.5 Da
Top MS/MS peaks per 100 Da. (Unknown)	8
MS/MS deisotoping (Unknown)	FALSE
PSM FDR	0.01
Protein FDR	0.01
Site FDR	0.01
Use Normalized Ratios For Occupancy	TRUE
Min. peptide Length	7
[truncated: 35 more rows]
