# Supplementary material for: Differential regulation of the proteome and phosphoproteome along the dorso-ventral axis of the early Drosophila embryo
Source: eLife. 2024 Sep 2;13:e99263. doi: 10.7554/eLife.99263 (PMC11466282; doi:10.7554/eLife.99263)
Supplement: Supplementary file 4. — p values are presented as -log10(p-value). Empty cell in gene and protein name indicate the detected phosphosite is hosted by a protein that had not been given a gene and/or a protein name in the Uniprot database version used in this study. NaN indicates a phosphosite that was not detected in a particular replicate. [file elife-99263-supp4.xlsx]

## Sheet: Description
Title	PhosphoSite (STY) Table
Groups	WT, GD, SP, TL, RM
Tests	1W ANOVA and pairwise t-tests
Software	MaxQuant
Fasta	Uniprot reference proteome
Column Name	Description
gd9/gd9_01	log2 transformed L/H SILAC ratios
gd9/gd9_02
gd9/gd9_03
Tlrm9/Tlrm10_01
Tlrm9/Tlrm10_02
Tlrm9/Tlrm10_03
spn27Aex/def_01
spn27Aex/def_02
spn27Aex/def_03
Tl10B/def_01
Tl10B/def_02
Tl10B/def_03
w1118_01
w1118_02
w1118_03
Amino acid	The modified amino acid
Charge	The charge of the detected peptide
ANOVA Significant_
Motifs	Known Kinase Motifs based on the Sequence window
Gene ontology (biological process)	Uniprot Gene Ontology Annotations
Gene ontology (cellular component)
Gene ontology (molecular function)
Localization prob	The probability for the localization at the specific site within the peptide
PEP	Posterior error probability
Score	The Andromeda Search Score
Delta score	The difference to the second best Andromeda score
Score for localization	The Andromeda Score for the MS2 that was used for localization
Mass error [ppm]
Intensity
Intensity L
Intensity H
Position
-log10 ANOVA p value	ANOVA test result
ANOVA q-value
-log10 p-value TL_WT	Pairwise comparison tests (two-sided t-test unpaired)
log2 FC TL_WT
-log10 p-value RM_WT
log2 FC RM_WT
-log10 p-value SP_WT
log2 FC SP_WT
-log10 p-value GD_WT
log2 FC GD_WT
-log10 combined score
-log10 p-value TL_GD
log2 FC TL_GD
-log10 p-value RM_GD
log2 FC RM_GD
-log10 p-value SP_GD
log2 FC SP_GD
-log10 p-value WT_GD
log2 FC WT_GD
-log10 p-value TL_SP
log2 FC TL_SP
-log10 p-value RM_SP
log2 FC RM_SP
-log10 p-value GD_SP
log2 FC GD_SP
-log10 p-value WT_SP
log2 FC WT_SP
q-value
-log10 p-value WT_RM
log2 FC WT_RM
-log10 p-value TL_RM
log2 FC TL_RM
-log10 p-value SP_RM
log2 FC SP_RM
-log10 p-value GD_RM
log2 FC GD_RM
-log10 p-value RM_TL
log2 FC RM_TL
-log10 p-value SP_TL
log2 FC SP_TL
-log10 p-value GD_TL
log2 FC GD_TL
-log10 p-value WT_TL
log2 FC WT_TL
Proteins
Positions within proteins	P-sites matching the uniprot entries in the column "Proteins"
Leading proteins
Protein
Protein names
Gene names
Sequence window	Flanking amino acids of the phosphorylation site
id
Positions
Best localization MS/MS ID	Evidence files and ids for the particular phoshosite.
Best localization raw file
Best PEP MS/MS ID
Best PEP raw file
Number of Phospho (STY)
Protein group IDs

## Sheet: Parameter
Parameter	Value
Version	1.5.3.8
User name	hnolte1
Machine name	MAXQUANT-SRV
Date of writing	06/25/2019 14:21:39
Fixed modifications	Carbamidomethyl (C)
Decoy mode	revert
Special AAs	KR
Include contaminants	TRUE
MS/MS tol. (FTMS)	20 ppm
Top MS/MS peaks per 100 Da. (FTMS)	12
MS/MS deisotoping (FTMS)	TRUE
MS/MS tol. (ITMS)	0.5 Da
Top MS/MS peaks per 100 Da. (ITMS)	8
MS/MS deisotoping (ITMS)	FALSE
MS/MS tol. (TOF)	40 ppm
Top MS/MS peaks per 100 Da. (TOF)	10
MS/MS deisotoping (TOF)	TRUE
MS/MS tol. (Unknown)	0.5 Da
Top MS/MS peaks per 100 Da. (Unknown)	8
MS/MS deisotoping (Unknown)	FALSE
PSM FDR	0.01
Protein FDR	0.01
Site FDR	0.01
Use Normalized Ratios For Occupancy	TRUE
Min. peptide Length	7
Min. score for unmodified peptides	0
Min. score for modified peptides	20
Min. delta score for unmodified peptides	0
Min. delta score for modified peptides	6
Min. unique peptides	0
Min. razor peptides	1
Min. peptides	1
Use only unmodified peptides and	TRUE
Modifications included in protein quantification	Oxidation (M);Acetyl (Protein N-term)
Peptides used for protein quantification	Razor
Discard unmodified counterpart peptides	TRUE
Min. ratio count	2
Use delta score	FALSE
iBAQ	FALSE
iBAQ log fit	FALSE
Match between runs	TRUE
Matching time window [min]	0.7
Alignment time window [min]	20
Find dependent peptides	FALSE
Fasta file	C:\Database\Uniprot_DONT_TOUCH_AND_CHANGE_Recent\DROME.fasta
Labeled amino acid filtering	TRUE
Site tables	Oxidation (M)Sites.txt;Phospho (STY)Sites.txt
Decoy mode	revert
Special AAs	KR
Include contaminants	TRUE
RT shift	FALSE
Advanced ratios	TRUE
AIF correlation	0
First pass AIF correlation	0
AIF topx	0
AIF min mass	0
AIF SIL weight	0
AIF ISO weight	0
AIF iterative	FALSE
AIF threshold FDR	0

## Sheet: data
gd9/gd9_01	gd9/gd9_02	gd9/gd9_03	Tlrm9/Tlrm10_01	Tlrm9/Tlrm10_02	Tlrm9/Tlrm10_03	spn27Aex/def_01	spn27Aex/def_02	spn27Aex/def_03	Tl10B/def_01	Tl10B/def_02	Tl10B/def_03	w1118_01	w1118_02	w1118_03	Amino acid	Charge	ANOVA Significant	Motifs	Gene ontology (biological process)	Gene ontology (cellular component)	Gene ontology (molecular function)	Localization prob	PEP	Score	Delta score	Score for localization	Mass error [ppm]	Intensity	Intensity L	Intensity H	Position	-log10 ANOVA p value	ANOVA q-value	-log10 p-value Tl10B/def_w1118	log2 FC Tl10B/def_w1118	-log10 p-value Tlrm9/Tlrm10_w1118	log2 FC Tlrm9/Tlrm10_w1118	-log10 p-value spn27Aex/def_w1118	log2 FC spn27Aex/def_w1118	-log10 p-value gd9_w1118	log2 FC gd9_w1118	-log10 combined score	-log10 p-value Tl10B/def_gd9	log2 FC Tl10B/def_gd9	-log10 p-value Tlrm9/Tlrm10_gd9	log2 FC Tlrm9/Tlrm10_gd9	-log10 p-value spn27Aex/def_gd9	log2 FC spn27Aex/def_gd9	-log10 p-value w1118_gd9
-0.0811394	-0.204868	-0.187697	1.26421	1.37882	1.367	-0.0362011	-0.386096	-0.431146	-0.0489096	-0.122758	-0.14224	0.122349	0.210761	0.176281	S	2	+	DNA dependent Protein kinase substrate motif;ERK1,2 kinase substrate motif;GSK-3, ERK1, ERK2, CDK5 substrate motif;WW domain binding motif	cell division [GO:0051301];DNA replication checkpoint [GO:0000076];intra-S DNA damage checkpoint [GO:0031573];positive regulation of cell proliferation [GO:0008284];replication fork arrest [GO:0043111];replication fork protection [GO:0048478]";"cell cycle phase transition [GO:0044770]	nuclear chromatin [GO:0000790];nucleus [GO:0005634];replication fork protection complex [GO:0031298]";"cytoplasm [GO:0005737]	DNA binding [GO:0003677]	1	0.000132929	128.33	85.031	83.137	-0.34462	2276500000	1646300000	630180000	195	7.49544	0	2.69552	-0.274433	4.89806	1.16688	1.62912	-0.454278	2.6711	-0.327698	11.8938	0.482148	0.0532656	5.02242	1.49458	0.41163	-0.12658	2.6711
-0.215471	-0.457998	-0.406176	-0.303004	-0.180157	-0.163569	0.728775	0.917073	0.893233	-0.290783	-0.126256	-0.120421	-0.408215	-0.528655	-0.418916	S	3	+	ERK1,2 kinase substrate motif;G protein-coupled receptor kinase 1 substrate motif;Growth associated histone HI kinase substrate motif;GSK-3, ERK1, ERK2, CDK5 substrate motif;PKA kinase substrate motif;PKC kinase substrate motif;WW domain binding motif	tRNA wobble uridine modification [GO:0002098]	Elongator holoenzyme complex [GO:0033588]		1	2.68147e-103	279.74	271.69	227.14	0.37158	52222000000	39824000000	12398000000	192	7.051	0.002	1.80033	0.272775	1.80835	0.236352	4.28848	1.29829	0.480789	0.0920469	8.37796	0.912189	0.180729	0.77443	0.144305	3.66237	1.20624	0.480789
-0.270847	-0.269248	-0.392989	0.247566	0.313256	0.234233	-0.168697	-0.145795	-0.142707	-0.0744111	-0.0713162	-0.0381563	-0.166261	-0.206101	-0.137943	S	2	+	Casein kinase II substrate motif	anterograde axonal transport of mitochondrion [GO:0098957];anterograde dendritic transport [GO:0098937];anterograde dendritic transport of neurotransmitter receptor complex [GO:0098971];axo-dendritic transport [GO:0008088];axon guidance [GO:0007411];axonogenesis [GO:0007409];centrosome separation [GO:0051299];cytoplasmic transport, nurse cell to oocyte [GO:0007303];dendrite morphogenesis [GO:0048…	axon cytoplasm [GO:1904115];cytoplasm [GO:0005737];cytosol [GO:0005829];dendrite cytoplasm [GO:0032839];kinesin complex [GO:0005871];microtubule [GO:0005874];microtubule plus-end [GO:0035371];synapse [GO:0045202]";"actin cap [GO:0030478]	ATP binding [GO:0005524];ATP-dependent microtubule motor activity, plus-end-directed [GO:0008574];microtubule binding [GO:0008017];microtubule motor activity [GO:0003777];motor activity [GO:0003774];tropomyosin binding [GO:0005523]";"ATPase activity [GO:0016887]	1	4.09378e-20	178.51	159.68	177.64	0.57242	42598000000	31783000000	10814000000	2	6.85208	0.002	2.04609	0.108807	3.8023	0.43512	0.342334	0.0177021	1.43984	-0.140926	7.63056	2.37422	0.249733	3.56888	0.576046	1.71717	0.158628	1.43984
-0.0195755	-0.0641086	-0.045506	0.485391	0.484119	0.566905	0.0267259	0.00992846	-0.0446826	-0.16927	-0.0754917	-0.113953	0.079683	-0.0237484	0.123169	S	2	+	Casein kinase II substrate motif;MDC1 BRCT domain binding motif;Plk1 PBD domain binding motif	mRNA transport [GO:0051028];positive regulation of GTPase activity [GO:0043547];positive regulation of transcription by RNA polymerase II [GO:0045944];protein import into nucleus [GO:0006606]";"heat shock-mediated polytene chromosome puffing [GO:0035080]	chromatin [GO:0000785];cytoplasm [GO:0005737];nuclear membrane [GO:0031965];nuclear pore [GO:0005643];nucleoplasm [GO:0005654];nucleus [GO:0005634];polytene chromosome band [GO:0005704]";"centrosome [GO:0005813]	Ran GTPase binding [GO:0008536]";"chromatin DNA binding [GO:0031490]	0.991715	4.40392e-19	180.05	169.91	134.52	-1.8784	6291100000	4541100000	1750100000	53	6.75631	0.0015	1.59975	-0.179273	3.03463	0.452437	0.570669	-0.0623773	1.06269	-0.102765	6.26774	1.1938	-0.0765082	4.28372	0.555201	0.736903	0.0403873	1.06269
1.28354	1.29531	1.34659	1.70867	1.69964	1.35865	0.215869	-0.0684664	-0.13566	0.398265	0.221546	0.162334	0.361591	0.0372298	0.096298	S	3	+	b-Adrenergic Receptor kinase substrate motif;BARD1 BRCT domain binding motif;Casein kinase I substrate motif;Casein kinase II substrate motif	maturation of SSU-rRNA from tricistronic rRNA transcript (SSU-rRNA, 5.8S rRNA, LSU-rRNA) [GO:0000462]	small-subunit processome [GO:0032040]";"Pwp2p-containing subcomplex of 90S preribosome [GO:0034388]	snoRNA binding [GO:0030515]	1	4.49406e-183	395.96	371.42	339.39	-0.61212	23797000000	15875000000	7921500000	915	6.41857	0.0016	0.320624	0.0956758	3.13657	1.42395	0.476148	-0.161125	3.44957	1.14344	7.38292	3.85273	-1.04776	1.12932	0.280507	3.54676	-1.30456	3.44957
-0.152149	-0.39706	-0.684622	1.58894	1.80375	1.60791	1.28597	1.36951	0.928058	0.102468	-0.00199992	-0.120153	0.0354011	-0.392279	-0.150946	S	2	+	Casein kinase II substrate motif;G protein-coupled receptor kinase 1 substrate motif;PKA kinase substrate motif				1	2.5762e-38	219.01	184.58	200.09	0.071802	137680000000	92769000000	44912000000	851	6.34781	0.00133333	0.511071	0.162713	3.69066	1.83614	2.75733	1.36379	0.541126	-0.242002	7.50019	1.14126	0.404715	3.60495	2.07814	2.84368	1.60579	0.541126
-0.0821621	-0.276183	-0.00846291	NaN	-0.133881	-0.0622822	1.57575	1.47853	1.34142	0.100843	0.152329	0.395886	NaN	0.160193	0.091662	S	2	+	Cdc2 kinase substrate motif;CDK kinase substrate motif;CDK1,2,4,6 kinase substrate motif;ERK1,2 kinase substrate motif;GSK-3, ERK1, ERK2, CDK5 substrate motif;PKA kinase substrate motif;PKC kinase substrate motif;WW domain binding motif	protein transport [GO:0015031]";"Golgi to endosome transport [GO:0006895]	endosome [GO:0005768];Golgi membrane [GO:0000139];trans-Golgi network [GO:0005802]";"cytosol [GO:0005829]		1	1.67417e-86	300.85	235.6	208.86	-0.5121	8008200000	5598300000	2409900000	604	5.80597	0.00342857	0.295371	0.0904251	1.34088	-0.224009	3.16169	1.3393	0.993617	-0.248197	5.79156	1.31028	0.338622	0.0783685	0.0241876	3.95484	1.5875	0.993617
1.29266	1.59746	1.42293	0.914123	0.906911	0.608834	1.68875	1.40466	1.12919	0.355306	0.165944	0.147215	0.00331442	-0.3693	-0.399351	S	2	+	ERK1,2 kinase substrate motif;GSK-3, ERK1, ERK2, CDK5 substrate motif;MDC1 BRCT domain binding motif;Plk1 PBD domain binding motif;WW domain binding motif	endosome to lysosome transport [GO:0008333];intracellular signal transduction [GO:0035556];phosphatidylinositol phosphorylation [GO:0046854];phosphorylation [GO:0016310]";"autophagosome maturation [GO:0097352]	endosome membrane [GO:0010008];vesicle membrane [GO:0012506]";"endosome [GO:0005768]	1-phosphatidylinositol-4-phosphate 5-kinase activity [GO:0016308];ATP binding [GO:0005524];zinc ion binding [GO:0008270]";"1-phosphatidylinositol-3-phosphate 5-kinase activity [GO:0000285]	0.974071	8.30088e-118	340	309.66	310.44	1.4233	12391000000	7559500000	4831200000	1407	5.49775	0.005	1.51706	0.477933	2.53793	1.06507	2.88445	1.66265	3.37997	1.69279	10.3194	3.40987	-1.21486	2.02795	-0.627727	0.0565748	-0.0301474	3.37997
-0.551086	-0.504263	-0.738057	-0.0151141	0.117266	0.321794	0.366406	0.550846	0.439939	0.164564	0.251007	0.286044	0.183709	0.110821	0.0830401	S	3	+	b-Adrenergic Receptor kinase substrate motif;Casein kinase II substrate motif;Pyruvate dehydrogenase kinase substrate motif	negative regulation of histone H3-K27 methylation [GO:0061086];negative regulation of histone H4-K16 acetylation [GO:2000619];negative regulation of transcription by RNA polymerase II [GO:0000122];negative regulation of transcription, DNA-templated [GO:0045892];positive regulation of methylation-dependent chromatin silencing [GO:0090309];positive regulation of Notch signaling pathway [GO:0045747]…	transcription factor complex [GO:0005667]";transcriptional repressor complex [GO:0017053];"nucleus [GO:0005634];nucleus [GO:0005634]	DNA-binding transcription factor activity [GO:0003700];transcription corepressor activity [GO:0003714];transcription factor binding [GO:0008134];transcription regulatory region DNA binding [GO:0044212]";"chromatin binding [GO:0003682];DNA binding [GO:0003677]	0.999844	9.70818e-28	172.77	162.82	120.93	0.73034	4113800000	2953100000	1160700000	68	5.37737	0.00555556	1.08156	0.108015	0.0518752	0.0154587	2.21996	0.32654	3.13593	-0.723659	6.48932	3.31513	0.831674	2.436	0.739118	3.52421	1.0502	3.13593
-0.0688957	-0.136895	-0.110395	-0.0241779	-0.0649471	-0.127885	0.446945	0.55031	0.382316	-0.127086	-0.091276	-0.199301	-0.115161	0.0315363	0.065848	S	2	+		transcription, DNA-templated [GO:0006351]";"regulation of alternative mRNA splicing, via spliceosome [GO:0000381]	small nuclear ribonucleoprotein complex [GO:0030532]	metal ion binding [GO:0046872]";"hydrolase activity, acting on acid anhydrides [GO:0016817]	0.846295	1.26009e-08	155.06	133.79	148.18	-0.56164	8442800000	6199600000	2243200000	1803	5.34947	0.0052	0.976639	-0.133295	0.452878	-0.0664113	2.4876	0.465782	0.778067	-0.0994696	4.69519	0.379625	-0.0338257	0.385806	0.0330584	3.36597	0.565252	0.778067
0.89739	1.43148	1.54005	0.0804837	0.108004	0.170839	1.27951	1.47051	1.01243	0.0821131	-0.0580926	0.0429462	-0.240407	-0.0209198	-0.0990232	S	2	+	b-Adrenergic Receptor kinase substrate motif;ERK1,2 kinase substrate motif;G protein-coupled receptor kinase 1 substrate motif;GSK3 kinase substrate motif;GSK-3, ERK1, ERK2, CDK5 substrate motif;WW domain binding motif	axon extension [GO:0048675];cell fate determination [GO:0001709];cellularization [GO:0007349];centrosome localization [GO:0051642];centrosome separation [GO:0051299];compound eye photoreceptor cell differentiation [GO:0001751];compound eye photoreceptor development [GO:0042051];establishment of epithelial cell apical/basal polarity [GO:0045198];evoked neurotransmitter secretion [GO:0061670];eye p…	axon cytoplasm [GO:1904115];centrosome [GO:0005813];cytoplasm [GO:0005737];dynactin complex [GO:0005869];dynein complex [GO:0030286];kinetochore [GO:0000776];kinetochore microtubule [GO:0005828];midbody [GO:0030496];spindle microtubule [GO:0005876];spindle pole centrosome [GO:0031616];type Ib terminal bouton [GO:0061176]";"aster [GO:0005818]	dynein intermediate chain binding [GO:0045505];microtubule binding [GO:0008017];motor activity [GO:0003774]";"dynein complex binding [GO:0070840]	0.999998	8.36241e-116	304.86	296.51	304.86	0.20301	17164000000	11063000000	6101500000	375	5.30569	0.00472727	0.864726	0.142439	1.5833	0.239892	3.13097	1.37427	2.60094	1.40976	8.17993	2.4746	-1.26732	2.36728	-1.16986	0.051037	-0.0354859	2.60094
0.162335	0.0185773	-0.10787	0.360982	0.368995	0.257577	0.559133	0.559686	0.447454	0.0186217	-0.00177164	-0.0353487	-0.0954713	-0.0512944	-0.0698985	S	2	+	Cdc2 kinase substrate motif;CDK kinase substrate motif;CDK1,2,4,6 kinase substrate motif;ERK1,2 kinase substrate motif;GSK-3, ERK1, ERK2, CDK5 substrate motif;PKA kinase substrate motif;PKC kinase substrate motif;WW domain binding motif	nuclear pore distribution [GO:0031081];protein import into nucleus [GO:0006606]";"mRNA export from nucleus [GO:0006406]	nuclear pore outer ring [GO:0031080]";"membrane [GO:0016020]	structural constituent of nuclear pore [GO:0017056]	0.999958	0.000815195	97.138	63.181	97.138	-0.19674	20113000000	14248000000	5864800000	137	5.14666	0.00566667	1.50591	0.0660552	3.33833	0.401406	3.94616	0.594313	0.538838	0.0965688	9.32925	0.142033	-0.0305136	1.62287	0.304837	2.34424	0.497744	0.538838
-0.370083	-0.568263	-0.648715	0.415237	0.431644	0.398526	-0.13704	-0.00599482	-0.0325098	-0.293961	0.0275211	-0.131938	-0.324862	-0.268263	-0.404375	S	2	+	Casein kinase II substrate motif;ERK1,2 kinase substrate motif;GSK-3, ERK1, ERK2, CDK5 substrate motif;WW domain binding motif	'de novo' UMP biosynthetic process [GO:0044205]";"'de novo' pyrimidine nucleobase biosynthetic process [GO:0006207]		orotidine-5'-phosphate decarboxylase activity [GO:0004590]";"orotate phosphoribosyltransferase activity [GO:0004588]	1	1.28085e-64	270.77	249.2	211.23	-0.77439	10358000000	7709400000	2648200000	447	5.04296	0.00569231	0.925276	0.199707	4.29022	0.747636	2.08674	0.273985	1.00522	-0.19652	8.30745	1.47696	0.396227	3.46078	0.944156	2.16111	0.470505	1.00522
-1.05813	-1.65108	-1.77177	0.409406	0.0827421	0.051448	0.759079	0.635801	0.28998	0.0585892	0.0775824	0.0773667	0.100342	-0.247731	-0.254731	S	2	+	Casein kinase I substrate motif;Casein kinase II substrate motif;G protein-coupled receptor kinase 1 substrate motif;MDC1 BRCT domain binding motif;Plk1 PBD domain binding motif	gastrulation [GO:0007369]	integral component of membrane [GO:0016021];vesicle [GO:0031982]";"cell surface [GO:0009986]		1	7.15081e-130	325.24	317.37	138.23	-2.4002	15545000000	11467000000	4078200000	479	4.97426	0.00628571	0.808797	0.205219	0.89738	0.315239	1.72021	0.69566	2.25739	-1.35962	5.68378	2.68057	1.56484	2.59784	1.67486	2.84931	2.05528	2.25739
-0.324239	-0.464779	-0.45626	-0.322309	-0.262328	-0.407523	-0.119201	-0.142133	-0.088489	0.234249	0.098456	0.0448212	-0.271364	-0.218869	-0.228099	T	3	+		embryonic development via the syncytial blastoderm [GO:0001700];G1/S transition of mitotic cell cycle [GO:0000082];G2/M transition of mitotic cell cycle [GO:0000086];germarium-derived cystoblast division [GO:0048142];male meiotic nuclear division [GO:0007140];mitotic cell cycle phase transition [GO:0044772];mitotic G2 DNA damage checkpoint [GO:0007095];mitotic G2/M transition checkpoint [GO:00448…	mitotic spindle [GO:0072686];nucleus [GO:0005634]";"cytoplasm [GO:0005737]	cyclin-dependent protein serine/threonine kinase activity [GO:0004693];protein kinase activity [GO:0004672];protein serine/threonine kinase activity [GO:0004674];RNA polymerase II CTD heptapeptide repeat kinase activity [GO:0008353]";"ATP binding [GO:0005524]	1	4.9357e-22	184.65	169.71	115.1	0.043493	209520000000	161010000000	48507000000	14	4.79076	0.0105333	2.47055	0.365286	0.946362	-0.0912765	2.26637	0.122836	1.6574	-0.175648	7.34068	2.76476	0.540935	0.610483	0.0843719	2.46549	0.298485	1.6574
-0.0455314	-0.144857	-0.0295972	-0.25744	-0.120729	-0.186097	0.465704	0.460338	0.305152	-0.0492887	0.109632	0.118921	0.0596904	0.0881526	0.0321199	S	2	+	DNA dependent Protein kinase substrate motif	compound eye development [GO:0048749];compound eye morphogenesis [GO:0001745];dendrite morphogenesis [GO:0048813];DNA endoreduplication [GO:0042023];DNA replication [GO:0006260];mitochondrial DNA replication [GO:0006264];positive regulation of gene expression [GO:0010628];positive regulation of transcription, DNA-templated [GO:0045893];protein autophosphorylation [GO:0046777];protein phosphorylat…	nucleus [GO:0005634];polytene chromosome [GO:0005700];transcription factor complex [GO:0005667]";"mitochondrion [GO:0005739]	DNA binding [GO:0003677];DNA-binding transcription factor activity [GO:0003700];transcription regulatory region sequence-specific DNA binding [GO:0000976]";"calcium ion binding [GO:0005509]	1	3.5835e-15	167.14	157.01	145.48	-0.43369	10466000000	7430200000	3035900000	45	4.71558	0.010375	0.00133562	-0.000233099	2.3611	-0.248076	2.50469	0.35041	1.55349	-0.133316	6.42061	0.952045	0.133083	1.00708	-0.11476	2.78945	0.483727	1.55349
-0.389881	-0.475388	-0.559367	0.221903	0.380508	NaN	-0.260958	-0.193882	-0.286691	-0.129928	0.0159256	-0.0449162	-0.266376	-0.140125	-0.134986	S	2	+	Casein kinase I substrate motif;Casein kinase II substrate motif;ERK1,2 kinase substrate motif;GSK-3, ERK1, ERK2, CDK5 substrate motif;MAPKAPK2 kinase substrate motif;WW domain binding motif	defense response to Gram-negative bacterium [GO:0050829];ER to Golgi vesicle-mediated transport [GO:0006888];intracellular protein transport [GO:0006886];intra-Golgi vesicle-mediated transport [GO:0006891];positive regulation of innate immune response [GO:0045089];regulation of lipid storage [GO:0010883]";"cell morphogenesis [GO:0000902]	Golgi apparatus [GO:0005794];Golgi membrane [GO:0000139]";"COPI vesicle coat [GO:0030126]	structural molecule activity [GO:0005198]	0.999868	1.06881e-37	213.01	189.08	200.71	-0.15581	18063000000	13889000000	4174200000	721	4.65775	0.0112941	0.991813	0.127523	2.02104	0.481701	0.581805	-0.0666816	1.97264	-0.294383	5.5673	2.54491	0.421906	2.53418	0.776084	1.81077	0.227701	1.97264
-0.0872707	-0.93127	-0.726086	0.222285	-0.151795	-0.0597976	1.02701	2.00341	1.82329	1.56635	1.38738	1.82843	-0.00676297	-0.581037	-0.466998	S	2	+	Cdc2 kinase substrate motif;CDK kinase substrate motif;CDK1,2,4,6 kinase substrate motif;ERK1,2 kinase substrate motif;GSK-3, ERK1, ERK2, CDK5 substrate motif;WW domain binding motif	positive regulation of Ras protein signal transduction [GO:0046579]";"negative regulation of hippo signaling [GO:0035331]	integral component of membrane [GO:0016021]";"FAR/SIN/STRIPAK complex [GO:0090443]	protein kinase binding [GO:0019901]	1	6.718e-80	294.01	265.22	294.01	0.034225	100890000000	19145000000	81742000000	606	4.59028	0.0117778	3.06524	1.94565	0.785914	0.355163	2.32031	1.9695	0.30282	-0.229943	6.47428	2.80331	2.17559	0.986951	0.585106	2.3001	2.19945	0.30282
0.184217	0.47415	0.259728	0.545299	0.855392	0.698574	-0.150198	-0.0630625	-0.209679	-0.343586	-0.342762	-0.373171	NaN	0.176323	0.477884	S	3	+	Casein kinase II substrate motif;Phosphorylase kinase substrate motif;PKA kinase substrate motif;PKC kinase substrate motif;Pyruvate dehydrogenase kinase substrate motif	7-methylguanosine mRNA capping [GO:0006370]	nucleus [GO:0005634]	RNA binding [GO:0003723]";"mRNA (guanine-N7-)-methyltransferase activity [GO:0004482]	1	1.49569e-43	193.84	192.91	193.84	0.1202	7849100000	6215600000	1633500000	22	4.53456	0.0121053	2.03554	-0.680277	0.98351	0.372651	1.47742	-0.468083	0.0444086	-0.021072	4.54088	2.78088	-0.659205	1.46488	0.393723	2.00583	-0.447011	0.0444086
-0.627911	-0.747886	-0.735406	-0.598897	-0.509899	-0.667384	-0.277447	-0.339648	-0.32311	-0.0565493	-0.0394005	-0.0420149	-0.364827	-0.623592	-0.68156	S	2	+	14-3-3 domain binding motif;Aurora-A kinase substrate motif;Calmodulin-dependent protein kinase II substrate motif;MAPKAPK2 kinase substrate motif;PAK2 kinase substrate motif;Phosphorylase kinase substrate motif;PKA kinase substrate motif;PKC epsilon kinase substrate motif;PKC kinase substrate motif	behavioral response to cocaine [GO:0048148];behavioral response to ethanol [GO:0048149];cellular response to ethanol [GO:0071361];cGMP-mediated signaling [GO:0019934];circadian rhythm [GO:0007623];locomotor rhythm [GO:0045475];rhythmic behavior [GO:0007622]";"axon guidance [GO:0007411]	cytoplasm [GO:0005737];cytosol [GO:0005829];plasma membrane [GO:0005886]";"cAMP-dependent protein kinase complex [GO:0005952]	cAMP binding [GO:0030552];cAMP-dependent protein kinase regulator activity [GO:0008603]";"3',5'-cyclic-GMP phosphodiesterase activity [GO:0047555]	1	4.47736e-72	250.48	240.76	147.23	1.0909	27623000000	21786000000	5837600000	84	4.53346	0.0115	2.19702	0.510672	0.120062	-0.0354002	1.15403	0.243258	0.634071	-0.147074	4.10518	4.16414	0.657746	0.875197	0.111674	3.11224	0.390333	0.634071
-0.495592	-0.602318	-0.48385	0.158098	0.402572	0.263745	-0.82705	-0.958524	-0.783902	-0.498264	-0.0932583	-0.184919	-0.539285	-0.24539	-0.259232	S	3	+	Casein kinase I substrate motif;Casein kinase II substrate motif;ERK1,2 kinase substrate motif;GSK-3, ERK1, ERK2, CDK5 substrate motif;WW domain binding motif	cuticle development [GO:0042335];IRES-dependent viral translational initiation [GO:0075522];locomotory behavior [GO:0007626];mRNA splicing, via spliceosome [GO:0000398];muscle cell cellular homeostasis [GO:0046716];negative regulation of protein phosphorylation [GO:0001933];oogenesis [GO:0048477];oviposition [GO:0018991];positive regulation by host of viral genome replication [GO:0044829];positiv…	catalytic step 2 spliceosome [GO:0071013];cytoplasm [GO:0005737];cytosol [GO:0005829];cytosolic small ribosomal subunit [GO:0022627];nucleus [GO:0005634];precatalytic spliceosome [GO:0071011]";"autophagosome [GO:0005776]	protein kinase C binding [GO:0005080];ribosome binding [GO:0043022]";"enzyme binding [GO:0019899];kinase activity [GO:0016301]	0.99928	3.64159e-65	281.53	263.64	125.04	0.29817	10237000000	8121500000	2115500000	277	4.5165	0.0119048	0.22384	0.089155	2.19502	0.622773	2.01719	-0.508523	0.8058	-0.179284	5.24186	0.98083	0.268439	3.25047	0.802058	2.15406	-0.329239	0.8058
0.586997	0.353644	0.401974	0.541422	0.321147	0.382803	-0.0927195	-0.243251	-0.358291	-0.127944	-0.0149807	-0.129468	0.276383	0.382662	0.231801	S	2	+	Casein kinase II substrate motif;ERK1,2 kinase substrate motif;GSK-3, ERK1, ERK2, CDK5 substrate motif;MAPKAPK2 kinase substrate motif;WW domain binding motif	distributive segregation [GO:0032837];female meiosis chromosome segregation [GO:0016321];homologous chromosome segregation [GO:0045143];regulation of meiotic cell cycle [GO:0051445]";"cell cycle arrest [GO:0007050]	nucleus [GO:0005634]";"chromosome [GO:0005694]	DNA binding [GO:0003677]	1	1.01846e-37	224.32	210.55	169.21	0.50575	2186500000	1555000000	631470000	52	4.50457	0.0117273	2.56652	-0.387746	0.675807	0.118176	2.39466	-0.528369	0.831064	0.15059	6.46806	2.58328	-0.538336	0.122372	-0.0324141	2.53481	-0.678959	0.831064
-0.140482	-0.0720227	-0.0481156	0.375037	0.641984	0.634543	-0.0051903	-0.0664674	0.0700253	0.0175483	0.100655	0.0904238	-0.0640021	-0.208328	-0.0126705	S	2	+	ERK1,2 kinase substrate motif;G protein-coupled receptor kinase 1 substrate motif;GSK-3, ERK1, ERK2, CDK5 substrate motif;WW domain binding motif	methionyl-tRNA aminoacylation [GO:0006431]	cytoplasm [GO:0005737];cytosol [GO:0005829]";"aminoacyl-tRNA synthetase multienzyme complex [GO:0017101]	methionine-tRNA ligase activity [GO:0004825]";"ATP binding [GO:0005524]	0.99904	1.7678e-36	203.33	189.16	134.03	1.6226	5742700000	4026700000	1716100000	953	4.48576	0.0114783	1.20549	0.164543	2.44187	0.645522	0.598459	0.0944559	0.042767	0.00812675	4.28858	1.83058	0.156416	2.64184	0.637395	0.83027	0.0863292	0.042767
0.77098	1.46006	1.67342	-0.182605	0.0898351	0.185062	1.0437	1.54362	1.28914	0.0231374	-0.0823049	-0.0229697	-0.155807	-0.105476	-0.26334	S	2	+		axon extension [GO:0048675];cell fate determination [GO:0001709];cellularization [GO:0007349];centrosome localization [GO:0051642];centrosome separation [GO:0051299];compound eye photoreceptor cell differentiation [GO:0001751];compound eye photoreceptor development [GO:0042051];establishment of epithelial cell apical/basal polarity [GO:0045198];evoked neurotransmitter secretion [GO:0061670];eye p…	axon cytoplasm [GO:1904115];centrosome [GO:0005813];cytoplasm [GO:0005737];dynactin complex [GO:0005869];dynein complex [GO:0030286];kinetochore [GO:0000776];kinetochore microtubule [GO:0005828];midbody [GO:0030496];spindle microtubule [GO:0005876];spindle pole centrosome [GO:0031616];type Ib terminal bouton [GO:0061176]";"aster [GO:0005818]	dynein intermediate chain binding [GO:0045505];microtubule binding [GO:0008017];motor activity [GO:0003774]";"dynein complex binding [GO:0070840]	1	2.10667e-73	257.71	229.55	202.61	-1.377	18220000000	11879000000	6341300000	370	4.4789	0.0115	1.24404	0.147495	0.794054	0.205639	3.19462	1.46703	2.22847	1.47636	7.46119	2.07874	-1.32887	1.90692	-1.27072	0.00997856	-0.00933568	2.22847
-0.174441	-0.772262	-0.535309	2.06185	1.69036	1.50826	-0.275745	-0.746905	-0.714423	0.939173	0.647744	0.596193	0.847243	-0.0711236	-0.0574311	S	2	+	Casein kinase II substrate motif;ERK1,2 kinase substrate motif;GSK-3, ERK1, ERK2, CDK5 substrate motif;PKA kinase substrate motif;PKC kinase substrate motif;Pyruvate dehydrogenase kinase substrate motif;WW domain binding motif	negative regulation of innate immune response [GO:0045824];negative regulation of Toll signaling pathway [GO:0045751];positive regulation of cell growth [GO:0030307];post-translational protein modification [GO:0043687];protein deubiquitination [GO:0016579];regulation of antimicrobial peptide production [GO:0002784];regulation of gene silencing [GO:0060968];regulation of protein stability [GO:0031…	nucleus [GO:0005634]	thiol-dependent ubiquitin-specific protease activity [GO:0004843]";"cysteine-type endopeptidase activity [GO:0004197];thiol-dependent ubiquitin-specific protease activity [GO:0004843]	1	6.18077e-06	143.43	129.2	46.068	-3.5476	3322400000	2449200000	873180000	588	4.47713	0.01112	0.689933	0.48814	1.92912	1.51393	1.13316	-0.818587	0.982227	-0.733567	4.73444	2.40801	1.22171	3.15266	2.24749	0.135895	-0.0850206	0.982227
0.0484055	-0.382035	-0.14908	0.882198	0.798559	0.890084	0.0850849	-0.232141	0.105276	0.0337294	0.0241777	0.149389	0.0342769	-0.130022	0.0468402	S	2	+	Cdc2 kinase substrate motif;CDK kinase substrate motif;CDK1,2,4,6 kinase substrate motif;ERK1,2 kinase substrate motif;G protein-coupled receptor kinase 1 substrate motif;GSK3 kinase substrate motif;GSK-3, ERK1, ERK2, CDK5 substrate motif;WW domain binding motif	morphogenesis of a polarized epithelium [GO:0001738];olfactory behavior [GO:0042048];regulation of cell proliferation [GO:0042127]";"imaginal disc morphogenesis [GO:0007560]	cytoplasm [GO:0005737]		1	3.57497e-08	138.25	120.43	112.95	0.39796	4833400000	3477800000	1355700000	353	4.44756	0.0113846	0.540599	0.0854006	3.77547	0.873249	0.00632328	0.00237506	0.455698	-0.144601	4.77809	0.814274	0.230002	2.87081	1.01785	0.371759	0.146976	0.455698
-0.223623	0.226121	0.425537	2.24132	1.99806	1.82783	0.177187	0.509848	0.957145	-0.424746	0.247478	0.292892	-0.147066	-0.18573	-0.0992469	S	2	+	ERK1,2 kinase substrate motif;G protein-coupled receptor kinase 1 substrate motif;Growth associated histone HI kinase substrate motif;GSK3 kinase substrate motif;GSK-3, ERK1, ERK2, CDK5 substrate motif;PKA kinase substrate motif;PKC kinase substrate motif;WW domain binding motif	regulation of alternative mRNA splicing, via spliceosome [GO:0000381];RNA catabolic process [GO:0006401]";"nuclear-transcribed mRNA catabolic process, 3'-5' exonucleolytic nonsense-mediated decay [GO:0070478]	Ski complex [GO:0055087]";"nucleus [GO:0005634]	ATP-dependent RNA helicase activity [GO:0004004];helicase activity [GO:0004386];RNA binding [GO:0003723]";"ATP binding [GO:0005524]	0.999998	2.39374e-51	264.01	233.05	211.67	0.72504	5709100000	3831500000	1877600000	193	4.42408	0.0112593	0.320792	0.182556	4.22058	2.16642	1.41742	0.692074	0.672082	0.286693	6.63088	0.12673	-0.104137	2.93964	1.87972	0.61375	0.405381	0.672082
-0.0986366	-0.261867	-0.196668	0.674162	0.575135	0.502642	0.166242	0.120564	0.109419	0.398759	0.231138	0.273337	-0.0337517	-0.463301	-0.44848	S	2	+	b-Adrenergic Receptor kinase substrate motif;Casein kinase II substrate motif;MAPKAPK2 kinase substrate motif;PKA kinase substrate motif;PKC kinase substrate motif	immune response [GO:0006955]";"cytoplasmic translation [GO:0002181];translation [GO:0006412]	cytosolic small ribosomal subunit [GO:0022627]";"cytosolic ribosome [GO:0022626];ribosome [GO:0005840]	structural constituent of ribosome [GO:0003735]	1	4.9383e-09	168.46	97.911	78.541	-0.29632	202890000000	151170000000	51726000000	239	4.39874	0.0115	1.83596	0.616256	2.41687	0.899157	1.46328	0.447253	0.363807	0.129454	6.07992	2.66797	0.486802	3.44172	0.769704	2.48638	0.317799	0.363807
0.384975	0.274943	0.282558	1.24136	1.19087	0.976341	0.295138	0.219584	0.122538	0.0747309	0.200705	0.10745	0.0677764	0.589506	0.336158	S	2	+	Casein kinase II substrate motif;ERK1,2 kinase substrate motif;GSK-3, ERK1, ERK2, CDK5 substrate motif;MDC1 BRCT domain binding motif;Plk1 PBD domain binding motif;WW domain binding motif	rRNA processing [GO:0006364]";"cleavage in ITS2 between 5.8S rRNA and LSU-rRNA of tricistronic rRNA transcript (SSU-rRNA, 5.8S rRNA, LSU-rRNA) [GO:0000448]	nucleolus [GO:0005730]	polynucleotide 5'-hydroxyl-kinase activity [GO:0051731]";"ATP binding [GO:0005524]	0.997208	3.29566e-46	235.68	207.51	195.1	0.24183	6389600000	4229600000	2160000000	92	4.38016	0.0115172	0.584728	-0.203518	2.03238	0.805045	0.304544	-0.118727	0.0372174	-0.0169883	2.95887	1.64334	-0.18653	3.1236	0.822033	0.764091	-0.101738	0.0372174
-1.46186	-1.11367	-1.17273	-1.30706	-0.944354	-0.989683	-0.630952	-0.390702	-0.524319	-0.556168	-0.520366	-0.563945	-0.368305	-0.0701572	0.00280436	S	2	+	14-3-3 domain binding motif;Calmodulin-dependent protein kinase II substrate motif;G protein-coupled receptor kinase 1 substrate motif;Phosphorylase kinase substrate motif;PKA kinase substrate motif;PKC epsilon kinase substrate motif;PKC kinase substrate motif	mitotic cell cycle [GO:0000278];negative regulation of catalytic activity [GO:0043086];negative regulation of phosphoprotein phosphatase activity [GO:0032515];negative regulation of protein dephosphorylation [GO:0035308];oogenesis [GO:0048477];regulation of meiotic cell cycle [GO:0051445];regulation of mitotic nuclear division [GO:0007088];response to nutrient [GO:0007584];water homeostasis [GO:0…	cytoplasm [GO:0005737]	protein phosphatase inhibitor activity [GO:0004864]	0.999603	3.02319e-31	219.89	183.47	170.95	0.73163	12918000000	11193000000	1724600000	107	4.37403	0.0112	1.60917	-0.401607	2.35986	-0.935148	1.3029	-0.370105	2.67311	-1.1042	7.94504	2.53427	0.702592	0.466341	0.169051	2.33832	0.734094	2.67311
-0.275516	-0.728354	-0.924575	0.547367	0.689075	0.437476	0.441057	0.33235	0.388639	0.350543	0.311559	0.311623	0.0542616	-0.223983	-0.1274	S	2	+		protein folding [GO:0006457]	cytosol [GO:0005829];nucleus [GO:0005634]";"cytoplasm [GO:0005737]	unfolded protein binding [GO:0051082]";"peptidyl-prolyl cis-trans isomerase activity [GO:0003755]	0.999999	1.01938e-21	209.43	186.28	184.43	-0.81231	1942500000	1394100000	548390000	226	4.32914	0.0120645	2.16476	0.423615	2.41319	0.657013	2.29197	0.486389	1.22358	-0.543775	8.0935	2.13229	0.96739	2.36867	1.20079	2.21269	1.03016	1.22358
-0.611438	-0.572328	-0.610012	0.00494741	0.237165	-0.0944911	-0.0301173	-0.222414	-0.18234	0.0955231	0.0346236	0.233373	-0.427832	-0.407112	-0.268942	S	3	+	b-Adrenergic Receptor kinase substrate motif;Casein kinase I substrate motif;Casein kinase II substrate motif;G protein-coupled receptor kinase 1 substrate motif;GSK3 kinase substrate motif;Plk1 kinase substrate motif	chromosome condensation [GO:0030261];DNA replication [GO:0006260];DNA replication initiation [GO:0006270];DNA-dependent DNA replication [GO:0006261];eggshell chorion gene amplification [GO:0007307];mitotic chromosome condensation [GO:0007076];mitotic spindle organization [GO:0007052]";"cell proliferation [GO:0008283]	heterochromatin [GO:0000792];nuclear origin of replication recognition complex [GO:0005664];nucleus [GO:0005634]";"alpha-heterochromatin [GO:0005723]	DNA replication origin binding [GO:0003688]";"chromatin binding [GO:0003682]	1	5.38904e-183	353.59	344.84	269.45	-0.48015	17417000000	12913000000	4503800000	102	4.30709	0.0121875	2.50022	0.489135	1.71354	0.417169	1.35489	0.223005	1.95445	-0.229964	7.5231	3.55153	0.719099	2.54661	0.647133	2.78385	0.452969	1.95445
-0.660746	-0.738999	-0.797055	1.63172	1.21121	1.05876	-0.77959	-0.578156	-0.625486	0.677262	0.462884	0.502321	0.214658	-0.794107	-0.992274	S	2	+	Casein kinase II substrate motif;Plk1 kinase substrate motif	cysteinyl-tRNA aminoacylation [GO:0006423]	cytoplasm [GO:0005737]	cysteine-tRNA ligase activity [GO:0004817];metal ion binding [GO:0046872];tRNA binding [GO:0000049]";"ATP binding [GO:0005524]	1	2.93148e-113	321.6	277.44	315.06	-0.042335	14112000000	11036000000	3076400000	297	4.2735	0.0131515	1.32188	1.0714	1.94499	1.82447	0.133443	-0.137169	0.215536	-0.208359	3.61585	4.11908	1.27976	3.49533	2.03283	0.418179	0.0711899	0.215536
NaN	0.320993	0.494756	NaN	0.162983	0.0491016	NaN	-0.0866524	-0.103891	NaN	0.0911847	0.155749	NaN	1.18764	1.14222	S	3	+	Casein kinase II substrate motif;ERK1,2 kinase substrate motif;GSK-3, ERK1, ERK2, CDK5 substrate motif;MAPKAPK2 kinase substrate motif;MDC1 BRCT domain binding motif;Plk1 PBD domain binding motif;WW domain binding motif	cell morphogenesis [GO:0000902];chaeta morphogenesis [GO:0008407];dendrite self-avoidance [GO:0070593];imaginal disc-derived wing hair organization [GO:0035317];imaginal disc-derived wing morphogenesis [GO:0007476];neuron projection development [GO:0031175];non-sensory hair organization [GO:0035316];oocyte morphogenesis [GO:0048601];positive regulation of protein kinase activity [GO:0045860];posi…	axon [GO:0030424];cell body [GO:0044297];cell cortex [GO:0005938];cytoplasm [GO:0005737];dendrite [GO:0030425]";"apical part of cell [GO:0045177]		0.96688	6.98772e-30	184	179.07	182.95	-0.23644	645850000	420740000	225110000	1268	4.21185	0.0140588	2.84366	-1.04146	2.47691	-1.05889	3.43018	-1.2602	1.86074	-0.757055	10.6115	1.0371	-0.284408	0.996343	-0.301832	1.54037	-0.503146	1.86074
0.363091	0.242072	0.210056	0.749377	0.740746	0.606531	0.619952	0.537785	0.445704	0.309452	0.278413	0.264044	0.329773	0.188734	0.16265	S	2	+	Cdc2 kinase substrate motif;CDK kinase substrate motif;CDK1,2,4,6 kinase substrate motif;ERK1,2 kinase substrate motif;G protein-coupled receptor kinase 1 substrate motif;Growth associated histone HI kinase substrate motif;GSK-3, ERK1, ERK2, CDK5 substrate motif;MDC1 BRCT domain binding motif;Plk1 PBD domain binding motif;WW domain binding motif	endocytosis [GO:0006897];exocytosis [GO:0006887];eye pigment biosynthetic process [GO:0006726];intracellular protein transport [GO:0006886];intracellular transport [GO:0046907];lysosome organization [GO:0007040];negative regulation of gene silencing by RNA [GO:0060967];Notch receptor processing [GO:0007220];ommochrome biosynthetic process [GO:0006727];regulation of lipid storage [GO:0010883];regu…	AP-3 adaptor complex [GO:0030123]	protein transporter activity [GO:0008565]	0.999963	5.95598e-128	338.67	315.84	236.48	0.38781	30064000000	20092000000	9971900000	796	4.17325	0.0146286	0.458132	0.0569172	2.60893	0.471832	1.88151	0.307428	0.254425	0.044687	5.20299	0.0897509	0.0122302	2.54064	0.427145	1.73029	0.262741	0.254425
NaN	0.674536	0.600686	0.258455	0.38392	0.436055	0.284036	-0.0170907	0.301915	-0.642774	-0.251941	-0.382641	NaN	1.26223	0.963492	S	2	+	G protein-coupled receptor kinase 1 substrate motif;GSK3 kinase substrate motif	mRNA transport [GO:0051028];NLS-bearing protein import into nucleus [GO:0006607];positive regulation of cell proliferation [GO:0008284];positive regulation of gene expression [GO:0010628];positive regulation of GTPase activity [GO:0043547];positive regulation of protein localization to nucleus [GO:1900182];positive regulation of RNA export from nucleus [GO:0046833];protein import into nucleus [GO…	cytoplasm [GO:0005737];nuclear pore [GO:0005643];nucleus [GO:0005634]";"centrosome [GO:0005813]	Ran GTPase binding [GO:0008536];transferase activity [GO:0016740]";"metal ion binding [GO:0046872]	0.995714	8.19055e-12	149.9	142.48	149.9	-0.96684	3518000000	2344300000	1173700000	2218	4.17317	0.0142222	2.43562	-1.53865	1.98596	-0.753386	1.88439	-0.923242	1.04204	-0.475252	7.34802	2.23178	-1.0634	1.49166	-0.278134	1.33465	-0.447991	1.04204
-0.0667531	-0.360714	-0.224455	0.29115	0.296845	0.255322	-0.0848069	-0.0863485	-0.0734762	-0.086382	-0.0920643	-0.0325633	-0.174186	-0.17397	-0.0837442	S	2	+	ERK1,2 kinase substrate motif;GSK-3, ERK1, ERK2, CDK5 substrate motif;MDC1 BRCT domain binding motif;PKA kinase substrate motif;PKC kinase substrate motif;Plk1 PBD domain binding motif;WW domain binding motif	regulation of chromatin silencing [GO:0031935]	cytosol [GO:0005829]	catalytic activity [GO:0003824]	0.999955	7.16989e-05	112.71	27.459	112.71	0.020241	7188300000	5249600000	1938700000	309	4.15661	0.0143784	0.969341	0.0736303	3.68944	0.425072	0.962047	0.0624229	0.335926	-0.0733406	5.95675	0.778538	0.146971	2.35726	0.498413	0.731457	0.135764	0.335926
NaN	1.48974	1.54367	0.736215	0.675034	0.445314	0.284452	-0.0285875	-0.0992235	0.486796	0.260929	0.254904	0.651316	0.250214	0.329153	S	3	+	Casein kinase II substrate motif;Plk1 kinase substrate motif;Pyruvate dehydrogenase kinase substrate motif	border follicle cell migration [GO:0007298];chemical synaptic transmission [GO:0007268];exocytosis [GO:0006887];Golgi to plasma membrane transport [GO:0006893];meiosis I cytokinesis [GO:0007110];meiosis II cytokinesis [GO:0007111];meiotic spindle organization [GO:0000212];neurotransmitter secretion [GO:0007269];plasma membrane organization [GO:0007009];positive regulation of synaptic growth at ne…	basal plasma membrane [GO:0009925];cytoplasm [GO:0005737];exocyst [GO:0000145];growth cone membrane [GO:0032584];membrane [GO:0016020];plasma membrane [GO:0005886];presynapse [GO:0098793];rhabdomere [GO:0016028];synapse [GO:0045202]";"apical plasma membrane [GO:0016324]		1	8.77989e-54	235.9	228.79	79.209	-0.02774	2390400000	1557700000	832730000	459	4.1365	0.0143684	0.203008	-0.0760178	0.61977	0.208627	0.986456	-0.358014	2.21049	1.10648	4.01973	2.879	-1.1825	2.34751	-0.897851	2.61198	-1.46449	2.21049
-0.286876	-0.232026	-0.298524	-0.00368644	0.0923315	0.0436462	-0.236261	-0.142045	-0.170508	-0.146761	-0.0147257	0.00583521	-0.266671	-0.227824	-0.263661	S	3	+	b-Adrenergic Receptor kinase substrate motif;Casein kinase II substrate motif;G protein-coupled receptor kinase 1 substrate motif;GSK3 kinase substrate motif	microtubule-based movement [GO:0007018];mitotic cell cycle [GO:0000278];retrograde axonal transport [GO:0008090];spermatid development [GO:0007286]";"determination of adult lifespan [GO:0008340]	cytoplasmic dynein complex [GO:0005868];dynein complex [GO:0030286];microtubule [GO:0005874];protein-containing complex [GO:0032991]";"axon cytoplasm [GO:1904115]	disordered domain specific binding [GO:0097718];dynein intermediate chain binding [GO:0045505];dynein light intermediate chain binding [GO:0051959];motor activity [GO:0003774];protein homodimerization activity [GO:0042803]";"ATPase activity, coupled [GO:0042623]	1	7.48486e-97	302.94	294.72	84.166	-4.2086	204480000000	149840000000	54636000000	4	4.11864	0.0144615	1.8156	0.200835	3.2102	0.296816	1.07323	0.0697806	0.34041	-0.0197567	6.43944	1.87754	0.220592	3.10719	0.316572	1.21516	0.0895374	0.34041
0.845342	1.36418	NaN	-0.13322	-0.344996	-0.415092	0.0448591	-0.132598	-0.151592	-0.058257	-0.215595	-0.380202	-0.131894	0.0419759	-0.0648542	S	3	+	Casein kinase II substrate motif;ERK1,2 kinase substrate motif;GSK-3, ERK1, ERK2, CDK5 substrate motif;WW domain binding motif		cytoplasm [GO:0005737]		0.999908	1.25294e-103	281.68	274.19	240	0.25357	11435000000	8291500000	3144000000	355	4.09799	0.0144	0.719079	-0.166427	1.17275	-0.246178	0.128526	-0.0281861	1.96291	1.15635	3.98326	1.99411	-1.32278	2.0952	-1.40253	1.96021	-1.18454	1.96291
-0.238535	-0.514987	-0.647019	0.651615	1.14935	0.700341	0.0945947	0.210003	0.124038	0.0388869	0.0160734	0.248125	-0.0350575	-0.225032	-0.418697	S	2	+	b-Adrenergic Receptor kinase substrate motif;Casein kinase I substrate motif;Casein kinase II substrate motif;Pyruvate dehydrogenase kinase substrate motif	DNA repair [GO:0006281];DNA replication checkpoint [GO:0000076];entrainment of circadian clock [GO:0009649];replication fork arrest [GO:0043111];replication fork protection [GO:0048478]";"DNA damage checkpoint [GO:0000077]	nuclear chromosome [GO:0000228];nucleus [GO:0005634];replication fork protection complex [GO:0031298]";"nuclear chromatin [GO:0000790]	DNA binding [GO:0003677]	1	1.24439e-137	346.66	342.09	114.92	0.1408	45457000000	32753000000	12704000000	1312	4.09388	0.0141951	1.15627	0.32729	2.26891	1.06003	1.47504	0.369141	0.667048	-0.240585	5.56726	1.80023	0.567876	2.54838	1.30061	2.08477	0.609726	0.667048
0.377517	0.207346	0.254312	0.535828	0.791254	0.629832	-0.0473599	-0.0992774	-0.0240453	-0.0449749	-0.149668	-0.213921	0.0150631	-0.478679	-0.421987	S	2	+	ERK1,2 kinase substrate motif;GSK-3, ERK1, ERK2, CDK5 substrate motif;WW domain binding motif	extracellular matrix organization [GO:0030198];liquid clearance, open tracheal system [GO:0035002];regulation of tube length, open tracheal system [GO:0035159]";"endocytosis [GO:0006897]	early endosome [GO:0005769];integral component of membrane [GO:0016021];plasma membrane [GO:0005886]";"cytoplasmic vesicle [GO:0031410]		0.999954	1.32631e-14	169.98	151.65	109.1	0.46566	9320900000	6874400000	2446400000	8	4.05869	0.0145714	0.413357	0.159013	2.26767	0.947506	0.688294	0.238307	1.60577	0.574926	4.9751	2.37951	-0.415913	1.83887	0.37258	2.43102	-0.336619	1.60577
-0.120915	-0.12955	0.00828138	0.320059	0.320253	0.312614	-0.0516345	-0.0654303	-0.196727	-0.131457	-0.0508566	-0.0884048	-0.193739	-0.0435333	0.00313425	S	3	+	Casein kinase II substrate motif;G protein-coupled receptor kinase 1 substrate motif	microtubule-based process [GO:0007017];nuclear axial expansion [GO:0035191];positive regulation of chromatin silencing [GO:0031937];regulation of cytoskeleton organization [GO:0051493];regulation of gene expression [GO:0010468]";"gene looping [GO:0090202]	condensed chromosome [GO:0000793];microtubule associated complex [GO:0005875];nucleus [GO:0005634];pericentriolar material [GO:0000242];polytene chromosome [GO:0005700];polytene chromosome band [GO:0005704];spindle microtubule [GO:0005876]";"centrosome [GO:0005813]	chromatin insulator sequence binding [GO:0043035];DNA binding [GO:0003677];metal ion binding [GO:0046872];microtubule binding [GO:0008017];POZ domain binding [GO:0031208];protein homodimerization activity [GO:0042803]";"chromatin binding [GO:0003682]	1	9.79405e-157	359.58	347.36	58.858	0.59261	22618000000	16675000000	5943100000	938	4.05126	0.0145581	0.0666481	-0.0121934	2.5774	0.395688	0.129548	-0.026551	0.0119208	-0.00268156	2.78551	0.0659094	-0.00951183	3.05941	0.39837	0.137275	-0.0238695	0.0119208
1.21731	2.31754	2.34216	0.245097	-0.281626	-0.398646	0.0692243	-0.369974	-0.36943	0.157497	-0.0561814	0.115553	0.183082	0.053528	0.184211	S	2	+	Casein kinase II substrate motif;Pyruvate dehydrogenase kinase substrate motif	regulation of exit from mitosis [GO:0007096]	nucleus [GO:0005634]		1	1.66118e-45	252.55	233.84	207.76	-0.92261	8587100000	6258000000	2329200000	248	4.04332	0.0143636	0.361464	-0.0679839	0.634614	-0.285332	1.12071	-0.363667	2.0852	1.81873	4.20199	2.1284	-1.88671	2.12684	-2.10406	2.26583	-2.18239	2.0852
-0.143864	-0.278511	-0.245543	0.273091	0.381143	0.322544	-0.100675	0.132116	-0.0927457	0.0158218	0.0308212	0.114315	-0.0869727	-0.00332501	-0.0649365	S	2	+	Casein kinase II substrate motif;Cdc2 kinase substrate motif;CDK kinase substrate motif;CDK1,2,4,6 kinase substrate motif;ERK1,2 kinase substrate motif;GSK-3, ERK1, ERK2, CDK5 substrate motif;WW domain binding motif	spliceosomal snRNP assembly [GO:0000387]";"mRNA splicing, via spliceosome [GO:0000398]	nucleus [GO:0005634];precatalytic spliceosome [GO:0071011];small nuclear ribonucleoprotein complex [GO:0030532];spliceosomal complex [GO:0005681];U1 snRNP [GO:0005685];U2 snRNP [GO:0005686];U4 snRNP [GO:0005687];U4/U6 x U5 tri-snRNP complex [GO:0046540];U5 snRNP [GO:0005682]";"catalytic step 2 spliceosome [GO:0071013]	RNA binding [GO:0003723]	0.991669	6.94088e-39	227.27	222.6	213.91	0.30994	7422200000	5498600000	1923500000	90	4.03568	0.0144	1.25059	0.105397	3.15142	0.377337	0.144779	0.03131	1.63823	-0.170894	6.18502	2.2559	0.276292	3.36683	0.548232	1.10044	0.202205	1.63823
0.391686	0.467555	0.315968	-0.0211931	-0.188032	-0.182699	0.0955886	-0.0235459	-0.0236393	0.0254776	0.0143485	-0.16124	0.00089297	0.0229908	-0.0225262	S	2	+	Casein kinase II substrate motif;ERK1,2 kinase substrate motif;GSK-3, ERK1, ERK2, CDK5 substrate motif;PKA kinase substrate motif;Pyruvate dehydrogenase kinase substrate motif;WW domain binding motif	mitochondrion inheritance [GO:0000001];spindle assembly involved in male meiosis [GO:0007053];syncytial blastoderm mitotic cell cycle [GO:0035186]";"male meiotic nuclear division [GO:0007140]	cytosol [GO:0005829];mitochondrion [GO:0005739]";"cytoplasm [GO:0005737]	RNA binding [GO:0003723]	0.999936	7.03312e-11	148.76	120.11	141.91	0.19342	25720000000	18568000000	7151200000	284	3.98963	0.0149565	0.26396	-0.0409239	1.09481	-0.131094	0.138552	0.0156819	2.99101	0.391284	4.48833	2.35445	-0.432208	2.76167	-0.522378	2.50282	-0.375602	2.99101
NaN	NaN	0.450802	NaN	0.0223323	-0.167849	NaN	-0.143028	-0.17327	NaN	-0.387372	-0.288523	NaN	1.26556	1.34948	S	2	+	Aurora-A kinase substrate motif;MAPKAPK2 kinase substrate motif;PAK2 kinase substrate motif;Phosphorylase kinase substrate motif;PKA kinase substrate motif;PKC kinase substrate motif	regulation of mitotic cell cycle [GO:0007346]";"mitotic spindle organization [GO:0007052]	mitotic spindle [GO:0072686];spindle pole [GO:0000922]";"interphase microtubule organizing center [GO:0031021]		1	0.00320671	87.485	53.398	62.166	-0.96874	1198100000	830780000	367270000	1256	3.9458	0.0168511	2.80998	-1.64546	2.25006	-1.38028	3.03396	-1.46567	-4.34294e-08	0	8.094	0	-0.788749	0	-0.523561	0	-0.608951	0
0.932441	0.790766	0.783327	0.872014	0.789664	0.68996	0.408962	0.234602	0.185606	0.279572	0.320465	0.327219	0.239898	-0.286974	-0.284807	T	2	+	Casein kinase II substrate motif;G protein-coupled receptor kinase 1 substrate motif;PAK2 kinase substrate motif;PKA kinase substrate motif;PKC kinase substrate motif	protein folding [GO:0006457]	chaperonin-containing T-complex [GO:0005832]	hydrolase activity [GO:0016787];unfolded protein binding [GO:0051082]";"ATP binding [GO:0005524]	0.999999	4.29599e-13	200.19	140.54	200.19	0.071352	13643000000	9212200000	4431100000	30	3.94335	0.0165	1.12216	0.419713	2.09081	0.894507	0.964543	0.387018	2.18683	0.946139	6.36434	3.31208	-0.526426	0.291899	-0.0516322	2.58999	-0.559122	2.18683
0.0810582	-0.361439	-0.43818	0.244706	-0.717669	-0.601215	1.51882	1.39594	1.22543	0.0474137	0.139011	0.063389	0.110365	0.0402188	0.112364	S	2	+	ERK1,2 kinase substrate motif;Growth associated histone HI kinase substrate motif;GSK-3, ERK1, ERK2, CDK5 substrate motif;PKA kinase substrate motif;PKC kinase substrate motif;WW domain binding motif	chromosome condensation [GO:0030261];female germ-line stem cell population maintenance [GO:0036099];female meiotic nuclear division [GO:0007143];flight [GO:0060361];histone phosphorylation [GO:0016572];male germ-line stem cell population maintenance [GO:0036098];meiotic cell cycle [GO:0051321];mitotic sister chromatid segregation [GO:0000070];mitotic spindle organization [GO:0007052];neuronal ste…	M band [GO:0031430];nucleolus [GO:0005730];nucleus [GO:0005634];sarcomere [GO:0030017];Z disc [GO:0030018]";"chromatin [GO:0000785]	histone threonine kinase activity [GO:0035184];metal ion binding [GO:0046872];protein kinase activity [GO:0004672];protein kinase activity [GO:0004672]";protein kinase binding [GO:0019901]";"ATP binding [GO:0005524]	1	1.12226e-06	119.45	106.95	111	-0.48813	13669000000	9602800000	4066200000	462	3.93519	0.0171429	0.0403675	-0.00437843	0.66412	-0.445709	3.89679	1.29241	0.935363	-0.32717	5.53665	0.917779	0.322791	0.126352	-0.118539	3.04748	1.61958	0.935363
0.821109	NaN	1.39808	-0.0432371	-0.250311	-0.220887	0.532552	0.522292	0.445632	-0.119022	-0.0833466	-0.353988	0.413248	0.620173	0.811608	S	2	+	BARD1 BRCT domain binding motif;Casein kinase II substrate motif			mRNA binding [GO:0003729]	1	9.12151e-157	350.59	340.65	281.13	-0.86325	10576000000	7189700000	3385900000	544	3.92933	0.01692	2.30147	-0.800462	2.40021	-0.786488	0.412944	-0.114851	0.810376	0.494583	5.925	1.89728	-1.29505	1.93879	-1.28107	1.16721	-0.609435	0.810376
0.31565	0.308695	0.370238	0.667684	0.846371	0.580705	0.0971632	-0.118723	-0.180694	-0.00942908	-0.199651	-0.18073	-0.171719	0.203355	0.158538	S	3	+	Casein kinase II substrate motif	apical protein localization [GO:0045176];asymmetric neuroblast division [GO:0055059];asymmetric protein localization involved in cell fate determination [GO:0045167];basal protein localization [GO:0045175];cell competition in a multicellular organism [GO:0035212];cell proliferation [GO:0008283];chitin-based larval cuticle pattern formation [GO:0035293];cortical actin cytoskeleton organization [GO…	basolateral plasma membrane [GO:0016323];cell cortex [GO:0005938];cortical actin cytoskeleton [GO:0030864];cortical cytoskeleton [GO:0030863];cytoplasm [GO:0005737];cytoskeleton [GO:0005856];cytosol [GO:0005829];extracellular matrix [GO:0031012];plasma membrane [GO:0005886];septate junction [GO:0005918];smooth septate junction [GO:0005920];synaptic vesicle [GO:0008021]";"apicolateral plasma membr…	myosin binding [GO:0017022];myosin II binding [GO:0045159];protein kinase inhibitor activity [GO:0004860];Rab GTPase binding [GO:0017137];SNARE binding [GO:0000149];syntaxin binding [GO:0019905]";"GTPase activator activity [GO:0005096]	1	1.16187e-210	382.2	372.97	169.84	0.21315	18090000000	13373000000	4716700000	484	3.88933	0.0176863	0.659007	-0.193329	1.95826	0.634861	0.378267	-0.13081	1.0511	0.268136	4.04664	2.71886	-0.461465	1.98251	0.366725	2.0038	-0.398946	1.0511
-0.226865	-0.155855	-0.436842	0.205393	-0.0535854	-0.107851	-0.502008	-0.342901	-0.337039	0.0739573	0.123335	0.103765	-0.53026	-0.867992	-0.756348	S	2	+	b-Adrenergic Receptor kinase substrate motif	mRNA transport [GO:0051028];NLS-bearing protein import into nucleus [GO:0006607];positive regulation of cell proliferation [GO:0008284];positive regulation of gene expression [GO:0010628];positive regulation of GTPase activity [GO:0043547];positive regulation of protein localization to nucleus [GO:1900182];positive regulation of RNA export from nucleus [GO:0046833];protein import into nucleus [GO…	cytoplasm [GO:0005737];nuclear pore [GO:0005643];nucleus [GO:0005634]";"centrosome [GO:0005813]	Ran GTPase binding [GO:0008536];transferase activity [GO:0016740]";"metal ion binding [GO:0046872]	1	5.05336e-05	143.03	67.296	114.5	-0.27532	673310000	483660000	189650000	2055	3.87696	0.0177308	2.90986	0.818553	2.21192	0.732852	1.34093	0.324217	1.57003	0.445013	8.03275	1.9204	0.37354	1.05427	0.287839	0.531137	-0.120796	1.57003
-0.31773	-0.487591	-0.634569	-0.27399	-0.161479	-0.285694	-0.0893925	0.00349475	-0.0680529	0.0871178	0.101966	0.111369	-0.147405	-0.3164	-0.275533	S	2	+	14-3-3 domain binding motif;Akt kinase substrate motif;Calmodulin-dependent protein kinase II substrate motif;Casein kinase II substrate motif;DNA dependent Protein kinase substrate motif;ERK1,2 kinase substrate motif;GSK-3, ERK1, ERK2, CDK5 substrate motif;MAPKAPK1 kinase substrate motif;PKA kinase substrate motif;PKC kinase substrate motif;WW domain binding motif	protein dephosphorylation [GO:0006470]	cytoplasm [GO:0005737]	protein serine/threonine phosphatase activity [GO:0004722]";"metal ion binding [GO:0046872]	0.999976	1.40652e-153	361.46	343.43	340.53	0.15222	211490000000	168740000000	42748000000	639	3.84102	0.0184151	2.59863	0.346597	0.0316703	0.00605883	1.54656	0.195129	1.04734	-0.233517	5.22419	2.49351	0.580114	1.12962	0.239576	1.95782	0.428647	1.04734
0.128819	0.452188	0.287719	-0.297491	-0.384204	-0.539534	0.19836	0.163359	0.0755952	0.0615342	0.0818516	0.261953	0.0747245	0.120448	0.020325	S	2	+	AMP-activated protein kinase substrate motif;b-Adrenergic Receptor kinase substrate motif;Calmodulin-dependent protein kinase II substrate motif;Casein kinase II substrate motif;Chk1 kinase substrate motif;HMGCoA Reductase kinase substrate motif;PKA kinase substrate motif;PKC kinase substrate motif	reciprocal meiotic recombination [GO:0007131]";"meiotic recombination checkpoint [GO:0051598]	nucleus [GO:0005634]";"chromosome [GO:0005694]	ATP binding [GO:0005524]	1	2.98917e-16	162.65	132.09	149.69	-0.67742	15477000000	10935000000	4541200000	417	3.81014	0.018963	0.380019	0.0632805	2.47897	-0.478909	0.726517	0.0739389	1.04661	0.217743	4.63212	0.613554	-0.154462	2.39647	-0.696652	0.648359	-0.143804	1.04661
-0.349041	-0.173431	-0.637166	0.651615	0.871127	0.481639	0.0583274	0.0337031	-0.017537	0.346742	0.0796811	0.112231	-0.267389	-0.092643	-0.0176998	S	2	+	b-Adrenergic Receptor kinase substrate motif;Casein kinase II substrate motif;Pyruvate dehydrogenase kinase substrate motif	DNA repair [GO:0006281];DNA replication checkpoint [GO:0000076];entrainment of circadian clock [GO:0009649];replication fork arrest [GO:0043111];replication fork protection [GO:0048478]";"DNA damage checkpoint [GO:0000077]	nuclear chromosome [GO:0000228];nucleus [GO:0005634];replication fork protection complex [GO:0031298]";"nuclear chromatin [GO:0000790]	DNA binding [GO:0003677]	1	1.24439e-137	346.66	342.09	114.92	0.1408	45387000000	32661000000	12726000000	1310	3.79159	0.0193455	1.2789	0.305462	2.38113	0.794038	0.910609	0.150742	0.779848	-0.260635	5.35049	1.62562	0.566097	2.40872	1.05467	1.39965	0.411377	0.779848
0.181296	0.180212	0.0406514	0.572667	0.465203	0.385357	0.0254632	-0.122661	-0.11765	0.382945	0.193385	0.212777	0.219738	0.203574	0.183645	S	2	+	Cdc2 kinase substrate motif;CDK kinase substrate motif;CDK1,2,4,6 kinase substrate motif;ERK1,2 kinase substrate motif;G protein-coupled receptor kinase 1 substrate motif;GSK-3, ERK1, ERK2, CDK5 substrate motif;WW domain binding motif	regulation of locomotor rhythm [GO:1904059]";"negative regulation of motor neuron apoptotic process [GO:2000672]	cytoplasm [GO:0005737]	Hsp90 protein binding [GO:0051879]";"Hsp70 protein binding [GO:0030544]	1	6.3476e-23	202.15	189.26	133.05	-0.03209	32153000000	22605000000	9548800000	374	3.78904	0.0191429	0.42401	0.0607168	2.10189	0.27209	2.27771	-0.273935	0.644225	-0.0682659	5.44784	0.780457	0.128983	2.04839	0.340356	1.42102	-0.205669	0.644225
-0.145848	-0.389697	-0.213755	0.0415688	-0.432065	0.0600474	0.697061	1.34903	1.53351	-0.240149	0.0405417	-0.105243	-0.112131	-0.359379	-0.193354	S	3	+	Casein kinase II substrate motif;ERK1,2 kinase substrate motif;GSK-3, ERK1, ERK2, CDK5 substrate motif;PKA kinase substrate motif;PKC kinase substrate motif;WW domain binding motif				0.999998	6.07008e-08	128.76	107.41	99.927	0.067645	1953200000	1396300000	556960000	77	3.78669	0.0189474	0.478354	0.120005	0.249933	0.111472	2.23318	1.41482	0.0980745	-0.0281452	3.05954	0.610602	0.14815	0.324585	0.139617	2.26412	1.44297	0.0980745
NaN	2.12302	1.50034	NaN	-0.0931721	-0.469736	0.604071	0.694406	0.301621	-0.182852	-0.289367	-0.389207	NaN	0.155057	0.0173926	S	4	+	Casein kinase I substrate motif;ERK1,2 kinase substrate motif;Growth associated histone HI kinase substrate motif;GSK-3, ERK1, ERK2, CDK5 substrate motif;WW domain binding motif	central nervous system projection neuron axonogenesis [GO:0021952];dendritic spine morphogenesis [GO:0060997];negative regulation of inflammatory response [GO:0050728];negative regulation of lamellocyte differentiation [GO:0035204];negative regulation of Toll signaling pathway [GO:0045751];protein desumoylation [GO:0016926];proteolysis [GO:0006508]";"cellular response to hypoxia [GO:0071456]	nuclear inner membrane [GO:0005637];nuclear pore [GO:0005643];nucleus [GO:0005634]";"cytoplasm [GO:0005737]	SUMO-specific isopeptidase activity [GO:0070140]	1	1.21337e-24	176.34	170.63	72.271	0.43849	2125500000	1421600000	703830000	1115	3.77275	0.0195862	1.56354	-0.373366	0.681768	-0.367679	1.15594	0.447142	1.4882	1.72546	4.88945	2.47858	-2.09882	1.53893	-2.09314	1.71313	-1.27831	1.4882
-0.0746667	-0.179519	-0.285071	0.186081	0.291422	0.11553	0.191071	0.245838	0.0939339	-0.0619121	-0.0188195	-0.0102133	-0.131259	-0.199964	-0.124634	S	3	+	Casein kinase I substrate motif;Casein kinase II substrate motif;ERK1,2 kinase substrate motif;Growth associated histone HI kinase substrate motif;GSK-3, ERK1, ERK2, CDK5 substrate motif;WW domain binding motif	mRNA splicing, via spliceosome [GO:0000398]	precatalytic spliceosome [GO:0071011];spliceosomal complex [GO:0005681]";"nucleus [GO:0005634]	RNA binding [GO:0003723];zinc ion binding [GO:0008270]";"pre-mRNA branch point binding [GO:0045131]	1	2.38417e-219	405.95	393.88	262.07	0.18736	126160000000	91390000000	34768000000	335	3.77255	0.0192542	1.86609	0.121638	2.46028	0.34963	2.54152	0.3289	0.159652	-0.0277996	7.02754	1.11889	0.149437	2.0487	0.37743	2.04411	0.3567	0.159652
0.994647	1.64997	2.13595	0.0642594	-0.224608	-0.30487	-0.0870041	-0.0265782	0.59436	0.0659535	0.0262799	0.0115	-0.341328	-0.477866	-0.268741	S	2	+	b-Adrenergic Receptor kinase substrate motif;Casein kinase I substrate motif;ERK1,2 kinase substrate motif;GSK-3, ERK1, ERK2, CDK5 substrate motif;MAPKAPK2 kinase substrate motif;WW domain binding motif	ribosome biogenesis [GO:0042254]";"positive regulation of telomerase activity [GO:0051973]	nucleus [GO:0005634]	ATP binding [GO:0005524];preribosome binding [GO:1990275]";"ATPase activity [GO:0016887]	1	6.95129e-51	262.59	241.74	215.15	0.61778	20521000000	14570000000	5950800000	510	3.76356	0.0191333	2.47944	0.397223	0.745839	0.207572	1.08675	0.522904	2.3616	1.95617	6.67364	2.03395	-1.55894	2.12798	-1.74859	1.65058	-1.43326	2.3616
0.044311	0.0921628	0.0688467	-0.122003	-0.273579	-0.307269	0.0614905	0.0705062	-0.030848	0.0374212	-0.00765345	-0.0131588	0.0923443	0.215426	0.23268	S	3	+	Casein kinase II substrate motif;G protein-coupled receptor kinase 1 substrate motif;GSK3 kinase substrate motif	nucleolus organization [GO:0007000]";"multicellular organism development [GO:0007275]	nucleus [GO:0005634];spindle [GO:0005819]";"nucleolus [GO:0005730]		1	5.04132e-127	338.71	319.04	179.85	-0.019612	66572000000	49376000000	17196000000	789	3.76299	0.0188197	1.68697	-0.174614	2.34282	-0.414434	1.25466	-0.146434	1.13483	-0.11171	6.41928	1.38717	-0.0629038	2.17511	-0.302724	0.420362	-0.0347239	1.13483
0.131474	1.34699	1.47747	-1.04258	-1.08634	-0.917052	-1.05467	-1.06171	-1.0707	-0.718986	-0.433748	-0.427705	-0.691242	-0.416716	-0.506853	S	3	+	14-3-3 domain binding motif;b-Adrenergic Receptor kinase substrate motif;BARD1 BRCT domain binding motif;Calmodulin-dependent protein kinase II substrate motif;Casein kinase II substrate motif;PKA kinase substrate motif;PKA, PKG kinase substrate motif;PKC epsilon kinase substrate motif;PKC kinase substrate motif;PKG kinase substrate motif	proteasome assembly [GO:0043248]	nucleus [GO:0005634];proteasome complex [GO:0000502]";"cytoplasm [GO:0005737]	protein-containing complex scaffold activity [GO:0032947]	1	0	495.26	480.9	299.23	-0.72676	78167000000	65038000000	13129000000	1683	3.74412	0.0190968	0.0307356	0.0114574	2.12568	-0.477054	2.53323	-0.524089	1.60129	1.52358	6.29093	1.58124	-1.51212	2.01032	-2.00063	2.05595	-2.04767	1.60129
-0.946578	-0.740381	-0.997066	-0.355439	-0.394992	-0.0407427	-0.303992	-0.075824	-0.265225	-0.239685	-0.137505	-0.142035	-0.309195	-0.148049	-0.252786	S	3	+	b-Adrenergic Receptor kinase substrate motif;Casein kinase II substrate motif;G protein-coupled receptor kinase 1 substrate motif	mRNA splicing, via spliceosome [GO:0000398];negative regulation of transposition, DNA-mediated [GO:0000335];regulation of autophagy [GO:0010506];RNA splicing [GO:0008380]";"apoptotic process [GO:0006915]	cytoplasm [GO:0005737];nucleus [GO:0005634];precatalytic spliceosome [GO:0071011]";"catalytic step 2 spliceosome [GO:0071013]	nucleic acid binding [GO:0003676]	0.998037	6.58743e-37	213.13	188.71	172.83	0.22117	20338000000	16047000000	4291100000	135	3.72439	0.0193651	0.477722	0.0636018	0.078371	-0.0270478	0.0909536	0.0216632	2.70106	-0.657998	3.3481	2.97077	0.7216	2.00223	0.630951	2.52456	0.679662	2.70106
NaN	0.0456315	-0.0721794	NaN	0.320742	0.336967	NaN	-0.0966532	-0.057692	NaN	-0.243265	-0.236109	NaN	0.222086	0.191563	S	2	+	14-3-3 domain binding motif;Aurora-A kinase substrate motif;Calmodulin-dependent protein kinase II substrate motif;Casein kinase II substrate motif;G protein-coupled receptor kinase 1 substrate motif;GSK3 kinase substrate motif;MDC1 BRCT domain binding motif;PAK2 kinase substrate motif;PKA kinase substrate motif;PKC epsilon kinase substrate motif;PKC kinase substrate motif;Plk1 PBD domain binding…				0.996134	3.89545e-05	139.61	96.896	132.06	-0.48591	2305600000	1582300000	723270000	766	3.72081	0.019125	2.91002	-0.446512	1.71048	0.12203	2.12449	-0.283997	1.16332	-0.220098	7.9083	1.20961	-0.226413	1.53906	0.342128	0.385831	-0.0638986	1.16332
1.37231	1.23632	1.68816	0.694924	0.82156	0.463614	1.02101	0.678326	0.574396	0.536904	0.240624	0.227078	0.35872	0.176822	0.392852	T	2	+	14-3-3 domain binding motif;Akt kinase substrate motif;Calmodulin-dependent protein kinase II substrate motif;G protein-coupled receptor kinase 1 substrate motif;GSK-3, ERK1, ERK2, CDK5 substrate motif;PKC kinase substrate motif;WW domain binding motif	regulation of transcription by RNA polymerase II [GO:0006357]	PcG protein complex [GO:0031519]";"nucleus [GO:0005634]	zinc ion binding [GO:0008270]";"DNA-binding transcription factor activity [GO:0003700]	1	5.46214e-09	162.37	145.13	137.39	-0.051553	23075000000	12675000000	10400000000	301	3.70111	0.0195077	0.0734748	0.0254039	1.3194	0.350568	1.38843	0.448447	2.77206	1.1228	5.55336	2.54969	-1.09739	1.97994	-0.77223	1.62281	-0.674351	2.77206
0.202708	0.282894	0.294637	0.100562	0.0831893	-0.0157842	0.029197	0.0326129	0.000202304	-0.0118421	0.0227315	-0.0547598	-0.0338099	0.00314624	0.0704525	S	2	+	Casein kinase II substrate motif;ERK1,2 kinase substrate motif;GSK-3, ERK1, ERK2, CDK5 substrate motif;PKA kinase substrate motif;PKC kinase substrate motif;WW domain binding motif	negative regulation of apoptotic process [GO:0043066]";"apoptotic process [GO:0006915]	nucleus [GO:0005634]		0.999976	0.000323225	107.55	86.816	99.568	-0.13125	9255000000	6584600000	2670400000	493	3.69256	0.0196667	0.299027	-0.0278864	0.378689	0.042726	0.0812559	0.00740781	2.37703	0.246817	3.136	2.77485	-0.274703	1.93357	-0.204091	2.83813	-0.239409	2.37703
-0.422059	-0.553139	-0.611051	0.00174496	0.054332	0.0563373	-0.217587	-0.231236	-0.284589	-0.184738	-0.166687	-0.143083	-0.184387	0.113542	-0.178634	S	2	+	ERK1,2 kinase substrate motif;GSK-3, ERK1, ERK2, CDK5 substrate motif;WW domain binding motif	cysteine biosynthetic process via cystathionine [GO:0019343];glutathione biosynthetic process [GO:0006750];sulfur amino acid metabolic process [GO:0000096];transsulfuration [GO:0019346]";"'de novo' L-methionine biosynthetic process [GO:0071266]	cytoplasm [GO:0005737]	cystathionine gamma-synthase activity [GO:0003962];L-cysteine desulfhydrase activity [GO:0080146];L-cystine L-cysteine-lyase (deaminating) [GO:0044540];pyridoxal phosphate binding [GO:0030170]";"cystathionine gamma-lyase activity [GO:0004123]	1	2.93933e-108	303.55	290.33	244	-0.15793	68282000000	52513000000	15770000000	20	3.68305	0.0195224	0.340891	-0.0816761	0.531562	0.120631	0.736056	-0.161311	1.76998	-0.44559	3.37849	2.5049	0.363914	3.18999	0.566221	2.05542	0.284279	1.76998
1.13197	1.70962	1.69452	-0.0421943	-0.167338	-0.112856	0.477648	-0.0567029	-0.2208	0.488269	0.16262	0.184941	0.284163	0.68921	0.0984193	S	2	+	b-Adrenergic Receptor kinase substrate motif;BARD1 BRCT domain binding motif;Casein kinase II substrate motif;G protein-coupled receptor kinase 1 substrate motif				0.99998	4.60345e-22	154.86	150.56	149.99	-0.92341	5645200000	3769700000	1875500000	7	3.66637	0.0202647	0.143313	-0.0786541	1.2255	-0.464727	0.458178	-0.290549	1.95775	1.15477	3.78474	2.32394	-1.23343	2.95286	-1.6195	2.15332	-1.44532	1.95775
-0.676094	-1.07976	-0.977357	0.0216136	0.926531	NaN	0.260733	0.0650208	-0.0740739	0.6432	0.531169	1.06977	-0.720279	-0.735877	-1.05093	S	2	+	b-Adrenergic Receptor kinase substrate motif;G protein-coupled receptor kinase 1 substrate motif;GSK3 kinase substrate motif	endocytosis [GO:0006897];exocytosis [GO:0006887];eye pigment biosynthetic process [GO:0006726];intracellular protein transport [GO:0006886];intracellular transport [GO:0046907];lysosome organization [GO:0007040];negative regulation of gene silencing by RNA [GO:0060967];Notch receptor processing [GO:0007220];ommochrome biosynthetic process [GO:0006727];regulation of lipid storage [GO:0010883];regu…	AP-3 adaptor complex [GO:0030123]	protein transporter activity [GO:0008565]	1	2.16535e-07	150.51	134.87	77.899	0.24693	1197200000	926850000	270340000	730	3.65433	0.0205217	2.89233	1.58374	1.43168	1.30977	2.49924	0.919589	0.176431	-0.0753732	6.99968	2.90571	1.65912	1.4728	1.38514	2.51618	0.994962	0.176431
0.450513	0.549154	0.634578	0.0336399	-0.138607	-0.198698	0.288337	0.0254139	-0.0883165	-0.147292	-0.188047	-0.0352689	0.071719	0.0664258	0.0845846	S	2	+	Casein kinase II substrate motif;G protein-coupled receptor kinase 1 substrate motif;PKA kinase substrate motif;PKC kinase substrate motif	temperature compensation of the circadian clock [GO:0010378]";"entrainment of circadian clock [GO:0009649]			0.999974	4.87461e-59	266.72	244.67	264.03	-0.043958	26139000000	18554000000	7585200000	1241	3.65046	0.0203429	1.89816	-0.197779	1.18127	-0.175465	0.00263812	0.000901703	3.03669	0.470505	6.11876	3.16997	-0.668284	2.7439	-0.64597	1.71903	-0.469603	3.03669
-0.268157	-0.464283	-0.597813	-0.00405192	0.106805	0.0860283	0.143289	0.380365	0.192143	-0.143803	0.0542214	-0.0763648	-0.144344	-0.0614624	-0.126623	T	2	+	Cdc2 kinase substrate motif;CDK1,2,4,6 kinase substrate motif;CDK5 kinase substrate motif;GSK-3, ERK1, ERK2, CDK5 substrate motif;RAF1 kinase substrate motif;WW domain binding motif	fatty acid beta-oxidation [GO:0006635]	mitochondrion [GO:0005739]	acetyl-CoA C-acyltransferase activity [GO:0003988]	1	5.40727e-20	201.3	175.77	54.511	-2.1514	11675000000	8615400000	3059900000	206	3.64543	0.020169	0.366022	0.0554942	1.82946	0.173737	1.9872	0.349409	1.54809	-0.332608	5.73077	1.59017	0.388102	2.12049	0.506345	2.32566	0.682017	1.54809
0.302152	1.11971	0.560465	-0.363048	-0.288255	-0.00851688	-0.0205647	0.394586	0.261961	-0.256107	-0.141745	-0.108866	1.00403	0.988164	1.33181	S	3	+	Casein kinase I substrate motif;Casein kinase II substrate motif;ERK1,2 kinase substrate motif;GSK-3, ERK1, ERK2, CDK5 substrate motif;PKA kinase substrate motif;PKC kinase substrate motif;WW domain binding motif	neurotransmitter secretion [GO:0007269];oogenesis [GO:0048477];synaptic vesicle endocytosis [GO:0048488]";"cell proliferation [GO:0008283]	early endosome [GO:0005769];Golgi apparatus [GO:0005794];nucleus [GO:0005634];presynapse [GO:0098793];trans-Golgi network [GO:0005802]";"cytoplasm [GO:0005737]		1	1.96414e-19	199.86	177.04	151.58	0.32122	4550200000	2888000000	1662300000	251	3.63032	0.0204167	3.34708	-1.27691	2.9862	-1.32794	2.24478	-0.896007	0.774685	-0.447227	9.35274	1.55673	-0.82968	1.53692	-0.880714	0.763183	-0.44878	0.774685
0.41393	0.854424	0.92389	0.103943	0.262072	0.514505	0.127599	0.219569	0.0981081	0.00958139	-0.0228181	0.0862427	NaN	1.16137	1.12327	S	3	+		histone H3-K9 methylation [GO:0051567];regulation of chromatin silencing [GO:0031935]";"heterochromatin organization [GO:0070828]	nucleus [GO:0005634];polytene chromosome [GO:0005700];polytene chromosome chromocenter [GO:0005701];polytene chromosome puff [GO:0005703]";"cytoplasm [GO:0005737]		1	3.63577e-34	176.95	175.61	176.95	-3.1443	5163700000	3695100000	1468700000	4	3.62995	0.0201644	3.8711	-1.11799	1.92181	-0.848815	3.57361	-0.993896	0.852547	-0.411574	10.2191	1.91042	-0.706413	1.02926	-0.437241	1.62535	-0.582323	0.852547
-0.638636	-0.810221	-0.727704	NaN	-0.165281	-0.0934226	-0.586823	-0.375349	-0.266714	-0.263525	-0.246591	-0.217642	NaN	-0.903978	-1.20684	S	2	+	Casein kinase II substrate motif;ERK1,2 kinase substrate motif;GSK-3, ERK1, ERK2, CDK5 substrate motif;MAPKAPK2 kinase substrate motif;WW domain binding motif		integral component of membrane [GO:0016021]	transmembrane transporter activity [GO:0022857]";"calcium ion binding [GO:0005509]	0.999999	1.26759e-07	158.25	135.11	158.25	0.0017439	444850000	316770000	128080000	10	3.62068	0.0201351	2.2437	0.812821	1.56701	0.926055	1.52314	0.645779	1.0733	0.329887	6.40716	3.14815	0.482935	2.48042	0.596169	1.38711	0.315892	1.0733
-0.278417	0.070389	-0.123	-0.301704	-0.195021	-0.180257	-0.545972	-0.527065	-0.510276	-0.587075	-0.336814	-0.432221	-0.653754	-0.766406	-0.859612	S	2	+	G protein-coupled receptor kinase 1 substrate motif	mRNA export from nucleus [GO:0006406];negative regulation of protein export from nucleus [GO:0046826];protein export from nucleus [GO:0006611];protein import into nucleus [GO:0006606];ribosomal large subunit export from nucleus [GO:0000055];ribosomal small subunit export from nucleus [GO:0000056]";"antimicrobial humoral response [GO:0019730]	nuclear envelope [GO:0005635];nuclear membrane [GO:0031965];nuclear pore [GO:0005643];nucleoplasm [GO:0005654]";"chromatin [GO:0000785]	structural constituent of nuclear pore [GO:0017056]";"chromatin binding [GO:0003682]	1	7.27712e-05	106.03	93.266	78.814	0.028354	1675700000	1316500000	359160000	503	3.60556	0.0204267	1.51204	0.307887	2.78307	0.534263	1.73509	0.232153	2.28636	0.649582	8.31656	1.28697	-0.341694	0.461687	-0.115319	1.83386	-0.417428	2.28636
NaN	0.299379	0.325847	NaN	-0.168046	-0.251985	NaN	0.0540844	0.0327517	NaN	-0.25135	-0.218587	NaN	NaN	0.686702	S	3	+	ERK1,2 kinase substrate motif;GSK-3, ERK1, ERK2, CDK5 substrate motif;MAPKAPK2 kinase substrate motif;PKA kinase substrate motif;PKC kinase substrate motif;WW domain binding motif				0.905719	0.00163569	65.231	46.606	59.728	-0.27425	530160000	359360000	170800000	332	3.59708	0.0203684	-4.34294e-08	0	-4.34294e-08	0	-4.34294e-08	0	-4.34294e-08	0	0	2.83099	-0.547582	2.15394	-0.522629	2.40196	-0.269195	0
-0.00996002	-0.302486	-0.184288	-0.0514531	-0.0861439	-0.146537	0.28858	0.310045	0.291555	-0.138663	0.135867	0.127799	0.28503	0.404509	0.431032	S	3	+		detection of light stimulus involved in visual perception [GO:0050908];protein peptidyl-prolyl isomerization [GO:0000413];regulation of calcium ion transport [GO:0051924]";"chaperone-mediated protein folding [GO:0061077]	inaD signaling complex [GO:0016027]";"cytoplasm [GO:0005737]	heat shock protein binding [GO:0031072];peptidyl-prolyl cis-trans isomerase activity [GO:0003755]";"FK506 binding [GO:0005528]	1	1.04202e-97	303.63	278.8	245.26	0.85227	74746000000	53546000000	21199000000	310	3.5569	0.0216364	1.52127	-0.331856	3.04901	-0.468235	0.779847	-0.0767967	2.30449	-0.539101	7.65462	0.770235	0.207246	0.325813	0.0708665	2.25177	0.462305	2.30449
0.795958	0.751689	0.486399	0.146044	0.473856	0.453694	0.145595	0.158452	0.158942	-0.0922078	0.085137	-0.138394	NaN	0.969363	0.728751	S	4	+	Casein kinase II substrate motif	egg activation [GO:0007343];eggshell chorion assembly [GO:0007306];maternal specification of dorsal/ventral axis, oocyte, soma encoded [GO:0007313];oocyte dorsal/ventral axis specification [GO:0007310];protein processing [GO:0016485];proteolysis [GO:0006508];Toll signaling pathway [GO:0008063]";"dorsal/ventral axis specification [GO:0009950]	extracellular region [GO:0005576]	serine-type endopeptidase activity [GO:0004252];serine-type peptidase activity [GO:0008236]";"peptidase activity [GO:0008233]	0.997113	3.29051e-135	305.56	294.54	305.56	-0.39372	5185500000	3435400000	1750100000	574	3.55349	0.0215128	2.24847	-0.897545	1.23936	-0.491193	2.347	-0.694727	0.459892	-0.171042	6.29472	2.44859	-0.726504	1.0481	-0.320151	2.24832	-0.523686	0.459892
-0.381838	-0.36844	-0.478824	-0.0691438	0.0206789	-0.0744583	-0.164014	-0.0498553	-0.126941	0.0231003	0.096615	0.179791	-0.214125	-0.08867	0.0539795	S	3	+	14-3-3 domain binding motif;Calmodulin-dependent protein kinase II substrate motif;Calmodulin-dependent protein kinase IV substrate motif;Chk1 kinase substrate motif;DNA dependent Protein kinase substrate motif;ERK1,2 kinase substrate motif;G protein-coupled receptor kinase 1 substrate motif;GSK-3, ERK1, ERK2, CDK5 substrate motif;MAPKAPK2 kinase substrate motif;PKA kinase substrate motif;PKC kin…	mRNA splicing, via spliceosome [GO:0000398]	precatalytic spliceosome [GO:0071011]		1	1.03403e-111	310.5	305.81	180.23	0.34366	392730000000	285050000000	107680000000	69	3.5457	0.0216709	0.953675	0.182774	0.193019	0.0419639	0.133808	-0.0306652	1.73707	-0.326762	3.01757	3.06012	0.509536	2.8636	0.368726	2.44274	0.296097	1.73707
-0.0959869	-0.0121117	-0.0035764	-0.53788	-0.584933	-0.743824	-0.771317	-0.47669	-0.609574	-0.288888	-0.563067	-0.538891	-0.109305	-0.293037	-0.183169	S	3	+	ERK1,2 kinase substrate motif;GSK-3, ERK1, ERK2, CDK5 substrate motif;MDC1 BRCT domain binding motif;PKA kinase substrate motif;PKC kinase substrate motif;Plk1 PBD domain binding motif;WW domain binding motif		integral component of membrane [GO:0016021]";"endomembrane system [GO:0012505]		0.5596	1.62681e-20	168.69	161.52	136.88	0.15256	11337000000	9036000000	2301000000	1250	3.52761	0.0218	1.2288	-0.268445	2.18753	-0.427042	1.86967	-0.424024	1.217	0.157945	6.503	2.00232	-0.42639	2.976	-0.584987	2.52813	-0.581969	1.217
0.0678054	0.140168	0.197864	-0.138398	-0.0883658	-0.120953	-0.043716	-0.106699	-0.0883119	-0.0730371	-0.0398908	0.0156277	-0.027424	0.0317362	-0.0316994	S	3	+	b-Adrenergic Receptor kinase substrate motif;Casein kinase II substrate motif	ecdysone receptor-mediated signaling pathway [GO:0035076];negative regulation of JAK-STAT cascade [GO:0046426];positive regulation of mitotic cell cycle [GO:0045931];positive regulation of Notch signaling pathway [GO:0045747];regulation of gene expression [GO:0010468]";"chromosome organization [GO:0051276]	polytene chromosome [GO:0005700];polytene chromosome interband [GO:0005705]";"nucleus [GO:0005634]	nucleic acid binding [GO:0003676]";"chromatin binding [GO:0003682]	1	2.75684e-156	359.9	349.13	193.93	0.13749	34891000000	25562000000	9329400000	552	3.51768	0.0219012	0.284954	-0.0233044	1.87758	-0.106777	1.19437	-0.0704466	1.55276	0.144408	4.90967	1.67102	-0.167712	2.4685	-0.251185	2.16015	-0.214855	1.55276
0.795958	0.751689	0.486399	0.146044	0.473856	0.453694	0.213492	0.158452	0.158942	-0.112976	0.085137	-0.138394	NaN	0.969363	0.728751	S	4	+	b-Adrenergic Receptor kinase substrate motif;Casein kinase II substrate motif	egg activation [GO:0007343];eggshell chorion assembly [GO:0007306];maternal specification of dorsal/ventral axis, oocyte, soma encoded [GO:0007313];oocyte dorsal/ventral axis specification [GO:0007310];protein processing [GO:0016485];proteolysis [GO:0006508];Toll signaling pathway [GO:0008063]";"dorsal/ventral axis specification [GO:0009950]	extracellular region [GO:0005576]	serine-type endopeptidase activity [GO:0004252];serine-type peptidase activity [GO:0008236]";"peptidase activity [GO:0008233]	1	3.29051e-135	305.56	294.54	95.205	0.52995	5185500000	3435400000	1750100000	581	3.50449	0.0222439	2.2354	-0.904468	1.23936	-0.491193	2.26629	-0.672095	0.459892	-0.171042	6.20095	2.44396	-0.733426	1.0481	-0.320151	2.15407	-0.501053	0.459892
0.31457	NaN	0.436482	0.00592426	NaN	0.00768455	0.473594	0.220454	0.245288	0.0968912	0.0574155	0.0320034	NaN	0.718263	0.865345	S	3	+	Casein kinase II substrate motif;Pyruvate dehydrogenase kinase substrate motif	ecdysone-mediated induction of salivary gland cell autophagic cell death [GO:0035072];larval midgut cell programmed cell death [GO:0035096];negative regulation of chromatin binding [GO:0035562];positive regulation of JAK-STAT cascade [GO:0046427];regulation of cell shape [GO:0008360];regulation of gene expression [GO:0010468];regulation of photoreceptor cell differentiation [GO:0046532];regulatio…	nucleus [GO:0005634]		1	1.39226e-96	284.98	259.74	264.59	-0.043798	10399000000	5863900000	4535000000	1881	3.49539	0.0222892	2.92224	-0.729701	2.06229	-0.785	1.57296	-0.478692	1.31133	-0.416278	7.86883	2.04881	-0.313422	1.58065	-0.368721	0.207144	-0.0624139	1.31133
NaN	-0.312044	-0.307394	NaN	3.54101	3.68145	NaN	NaN	NaN	NaN	NaN	NaN	NaN	NaN	1.25036	S	2	+	Casein kinase I substrate motif;PKA kinase substrate motif;PKC kinase substrate motif	cytoskeleton organization [GO:0007010];heart development [GO:0007507];histone acetylation [GO:0016573];histone exchange [GO:0043486]";maintenance of protein location in cell [GO:0032507];mitotic cytokinesis [GO:0000281];mitotic cytokinesis [GO:0000281]";muscle thin filament assembly [GO:0071689];neuromuscular junction development, skeletal muscle fiber [GO:0098529];regulation of synapse organizat…	brahma complex [GO:0035060];cytoplasm [GO:0005737];cytoplasm [GO:0005737]";Ino80 complex [GO:0031011]";NuA4 histone acetyltransferase complex [GO:0035267]";plasma membrane [GO:0005886]";"actin filament [GO:0005884]	structural constituent of cytoskeleton [GO:0005200]";"ATP binding [GO:0005524];ATP binding [GO:0005524]	1	0.000310627	103.32	93.521	92.661	0.74369	516970000	142460000	374510000	61	3.49362	0.0220714	-4.34294e-08	0	-4.34294e-08	0	-4.34294e-08	0	-4.34294e-08	0	0	0	NaN	3.49362	3.92095	0	NaN	0
0.178285	0.135167	0.0797024	0.0103009	0.0766	0.0621097	0.00184569	-0.0570399	-0.132088	-0.268123	-0.136347	-0.155007	-0.121593	-0.0336964	-0.101468	S	2	+	14-3-3 domain binding motif;Calmodulin-dependent protein kinase II substrate motif;Calmodulin-dependent protein kinase IV substrate motif;Chk1 kinase substrate motif;ERK1,2 kinase substrate motif;GSK-3, ERK1, ERK2, CDK5 substrate motif;PKA kinase substrate motif;PKC kinase substrate motif;WW domain binding motif	cellular response to heat [GO:0034605];germ-line stem cell population maintenance [GO:0030718];heat shock-mediated polytene chromosome puffing [GO:0035080];larval lymph gland hemopoiesis [GO:0035167];male germ-line stem cell population maintenance [GO:0036098];mRNA transport [GO:0051028];negative regulation by host of viral transcription [GO:0043922];positive regulation of actin filament polymeri…	cytoplasm [GO:0005737];nuclear membrane [GO:0031965];nuclear pore [GO:0005643];nuclear pore central transport channel [GO:0044613];nuclear pore cytoplasmic filaments [GO:0044614];nucleoplasm [GO:0005654];nucleus [GO:0005634];polytene chromosome [GO:0005700];polytene chromosome band [GO:0005704];polytene chromosome puff [GO:0005703]";"chromatin [GO:0000785]	nuclear localization sequence binding [GO:0008139];promoter-specific chromatin binding [GO:1990841];RNA binding [GO:0003723];serine-type peptidase activity [GO:0008236];structural constituent of nuclear pore [GO:0017056]";"chromatin DNA binding [GO:0031490]	0.999988	7.82521e-05	111.12	93.1	110.44	0.16207	2173900000	1594200000	579710000	604	3.48575	0.0220706	0.964261	-0.100907	1.81261	0.135256	0.188407	0.0231582	2.28899	0.216637	5.25426	2.49887	-0.317544	1.09593	-0.0813811	1.79963	-0.193479	2.28899
-1.08344	-0.671632	-0.900904	-0.407769	-0.383168	-1.35089	0.13241	0.156914	0.148405	0.518914	0.276318	0.30729	0.44572	0.363339	0.266397	S	2	+	14-3-3 domain binding motif;Calmodulin-dependent protein kinase II alpha substrate motif;Calmodulin-dependent protein kinase II substrate motif;Calmodulin-dependent protein kinase IV substrate motif;Casein kinase II substrate motif;Chk1 kinase substrate motif;G protein-coupled receptor kinase 1 substrate motif;Phosphorylase kinase substrate motif;PKA kinase substrate motif;PKC epsilon kinase subs…	phosphatidylinositol biosynthetic process [GO:0006661]	extrinsic component of vacuolar membrane [GO:0000306];PAS complex [GO:0070772]";"endosome membrane [GO:0010008]		1	1.52246e-15	191.84	186.06	89.911	3.4169	3977000000	3023000000	953950000	680	3.48036	0.021907	0.0330428	0.00902199	1.53314	-1.07243	1.81504	-0.212576	3.17714	-1.24381	6.55836	3.04722	1.25283	0.193272	0.171383	3.0058	1.03124	3.17714
0.35208	0.814099	0.90766	NaN	-0.762209	-0.634666	NaN	-0.361268	-0.423952	NaN	-0.720731	-0.586098	-0.278076	-0.589615	-0.582687	S	2	+	Calmodulin-dependent protein kinase II substrate motif;Cdc2 kinase substrate motif;CDK kinase substrate motif;CDK1,2,4,6 kinase substrate motif;Chk1 kinase substrate motif;ERK1,2 kinase substrate motif;GSK-3, ERK1, ERK2, CDK5 substrate motif;PKA kinase substrate motif;PKC kinase substrate motif;WW domain binding motif				1	0.00435413	82.912	65.516	63.944	-0.36473	3020300000	2444100000	576140000	72	3.46941	0.021908	0.499384	-0.169955	0.648984	-0.214978	0.261076	0.0908494	2.37623	1.17474	3.78567	2.01547	-1.34469	2.0588	-1.38972	1.77941	-1.08389	2.37623
0.487357	0.597392	0.52095	0.552859	0.567707	0.488867	0.415689	0.164288	0.240646	0.104474	0.142522	0.143302	-0.0120547	0.207666	0.247394	S	2	+	Casein kinase I substrate motif;ERK1,2 kinase substrate motif;Growth associated histone HI kinase substrate motif;GSK-3, ERK1, ERK2, CDK5 substrate motif;PKA kinase substrate motif;PKC kinase substrate motif;WW domain binding motif	prostaglandin biosynthetic process [GO:0001516]";"oxidation-reduction process [GO:0055114]	intracellular membrane-bounded organelle [GO:0043231];mitochondrial outer membrane [GO:0005741]";"integral component of membrane [GO:0016021]	prostaglandin-E synthase activity [GO:0050220]";"glutathione transferase activity [GO:0004364]	1	6.73144e-16	174.39	161.21	130.47	1.6506	2962400000	2018300000	944130000	54	3.4442	0.0224318	0.0755972	-0.0175689	2.00393	0.388809	0.501151	0.125873	1.95053	0.387565	4.53121	3.49784	-0.405133	0.0101114	0.00124478	1.49182	-0.261692	1.95053
0.802075	2.3284	2.39824	-0.432948	-0.555513	-0.597896	-0.272264	-0.676857	-0.753191	-0.348522	0.329306	0.309945	-0.200726	-0.258384	-0.309466	S	2	+	b-Adrenergic Receptor kinase substrate motif;BARD1 BRCT domain binding motif;Casein kinase II substrate motif;PKA kinase substrate motif	translational initiation [GO:0006413]	cytosol [GO:0005829]";"cytoplasm [GO:0005737]	GTP binding [GO:0005525];GTPase activity [GO:0003924];translation initiation factor activity [GO:0003743]";"DEAD/H-box RNA helicase binding [GO:0017151]	1	1.77752e-91	298.45	285.03	212.35	-0.5934	219420000000	172610000000	46811000000	76	3.43385	0.0227865	0.717527	0.353102	2.01586	-0.272594	0.955417	-0.311245	1.80072	2.0991	5.48952	1.43358	-1.746	1.97678	-2.37169	1.94866	-2.41034	1.80072
0.265927	0.395203	0.283776	0.465994	0.339593	0.262409	0.20259	0.0907731	0.0352994	0.123985	0.0867896	0.0852446	0.0356974	-0.0463042	-0.0104462	S	2	+	Casein kinase II substrate motif;ERK1,2 kinase substrate motif;G protein-coupled receptor kinase 1 substrate motif;Growth associated histone HI kinase substrate motif;GSK-3, ERK1, ERK2, CDK5 substrate motif;MAPKAPK2 kinase substrate motif;PKA kinase substrate motif;PKC kinase substrate motif;WW domain binding motif		integral component of membrane [GO:0016021]		0.99999	7.00466e-15	180.68	172.61	91.694	-0.34906	35168000000	24975000000	10192000000	153	3.42798	0.0227333	1.76651	0.105691	2.32408	0.363016	1.00111	0.116572	2.62772	0.321986	7.71943	2.15701	-0.216296	0.223054	0.0410299	1.49324	-0.205415	2.62772
-0.437135	-0.86551	-0.611434	0.296978	0.362446	-0.0143106	0.00985069	-0.0732926	-0.225589	0.0635322	0.0265818	0.00686967	-0.270771	-0.145558	-0.302104	S	2	+	b-Adrenergic Receptor kinase substrate motif;Casein kinase I substrate motif;Casein kinase II substrate motif;G protein-coupled receptor kinase 1 substrate motif	behavioral response to ethanol [GO:0048149];long-term memory [GO:0007616];negative regulation of translation [GO:0017148];oogenesis [GO:0048477];ovarian follicle cell development [GO:0030707];positive regulation of filopodium assembly [GO:0051491]";"axon midline choice point recognition [GO:0016199]	axonal growth cone [GO:0044295];cytoplasm [GO:0005737];filopodium [GO:0030175];neuronal cell body [GO:0043025]";"axon [GO:0030424]	ribosome binding [GO:0043022];translation initiation factor binding [GO:0031369]";"ribosomal small subunit binding [GO:0043024]	1	3.15637e-207	425.36	404.35	277.72	-2.8847	42103000000	32005000000	10098000000	412	3.41736	0.0229231	2.23575	0.271805	1.64926	0.454515	0.787278	0.143134	1.3947	-0.398549	6.06699	2.228	0.670354	2.129	0.853064	1.72235	0.541683	1.3947
1.23341	1.98805	1.48367	0.465547	0.038811	0.50853	0.295977	0.343919	0.723672	0.534231	0.23773	0.267828	0.330051	-0.200349	-0.0154034	S	3	+	Cdc2 kinase substrate motif;CDK kinase substrate motif;CDK1,2,4,6 kinase substrate motif;ERK1,2 kinase substrate motif;GSK-3, ERK1, ERK2, CDK5 substrate motif;WW domain binding motif	female germ-line stem cell population maintenance [GO:0036099];histone acetylation [GO:0016573];histone H3 acetylation [GO:0043966];mushroom body development [GO:0016319];negative regulation of stem cell differentiation [GO:2000737];negative regulation of transcription, DNA-templated [GO:0045892];neuroblast proliferation [GO:0007405];nucleosome assembly [GO:0006334];positive regulation of transcr…	MOZ/MORF histone acetyltransferase complex [GO:0070776];nuclear chromatin [GO:0000790];nucleosome [GO:0000786];nucleus [GO:0005634]";"histone acetyltransferase complex [GO:0000123]	H4 histone acetyltransferase activity [GO:0010485];histone acetyltransferase activity (H3-K23 specific) [GO:0043994];histone acetyltransferase activity [GO:0004402];histone binding [GO:0042393];metal ion binding [GO:0046872]";"DNA binding [GO:0003677]	0.988849	3.34961e-17	143.01	139.39	115.35	0.91671	1725700000	1072800000	652940000	1230	3.39935	0.0232609	0.782833	0.308497	0.623926	0.29953	0.945445	0.416423	2.31514	1.53028	4.66735	2.14616	-1.22178	1.99717	-1.23075	1.8931	-1.11385	2.31514
0.0140932	-0.0442815	-0.128211	-0.186659	-0.19632	-0.321694	0.058899	0.0268322	0.0396193	0.063829	0.0384373	0.0442147	-0.0537275	0.0567197	0.042899	S	2	+	14-3-3 domain binding motif;Calmodulin-dependent protein kinase II substrate motif;Casein kinase II substrate motif;DNA dependent Protein kinase substrate motif;ERK1,2 kinase substrate motif;GSK-3, ERK1, ERK2, CDK5 substrate motif;PKA kinase substrate motif;PKC kinase substrate motif;WW domain binding motif		nucleoplasm [GO:0005654]	zinc ion binding [GO:0008270]";"nucleic acid binding [GO:0003676]	0.999974	4.80972e-11	156.52	156.52	123.75	-0.40452	4182500000	3068200000	1114400000	423	3.38706	0.0235269	0.398617	0.03353	1.96387	-0.250188	0.298972	0.0264865	0.559729	-0.068097	3.22119	1.13771	0.101627	1.41396	-0.182091	1.04956	0.0945834	0.559729
-0.14712	-0.647563	-0.383315	-0.282725	-0.517913	-0.514604	0.328061	0.553725	0.351972	-0.422923	-0.188169	-0.122473	-0.151063	-0.130565	-0.244894	S	2	+	b-Adrenergic Receptor kinase substrate motif;Casein kinase II substrate motif;G protein-coupled receptor kinase 1 substrate motif	regulation of transcription, DNA-templated [GO:0006355]	nucleus [GO:0005634]	DNA-binding transcription factor activity [GO:0003700];transcription regulatory region sequence-specific DNA binding [GO:0000976];zinc ion binding [GO:0008270]";"DNA binding [GO:0003677]	1	2.05152e-73	295.15	249.87	197.07	0.25791	17868000000	13425000000	4442600000	393	3.37352	0.0238723	0.284731	-0.0690142	1.43143	-0.262906	2.74034	0.58676	0.661278	-0.217159	5.11778	0.361569	0.148145	0.100003	-0.0457477	2.12067	0.803919	0.661278
NaN	0.97263	0.905644	NaN	1.34841	1.09689	NaN	0.567109	0.437281	NaN	0.630148	0.576746	NaN	0.0678892	0.0585889	S	2	+	Casein kinase II substrate motif;PKA kinase substrate motif;PKC kinase substrate motif	regulation of alternative mRNA splicing, via spliceosome [GO:0000381]	nucleus [GO:0005634]	zinc ion binding [GO:0008270]	1	0.00220513	99.752	93.161	78.116	-0.27063	6218600000	4005700000	2212900000	1173	3.37235	0.0237053	2.60072	0.540208	1.93637	1.15941	1.67198	0.438956	2.82767	0.875898	9.03674	1.79875	-0.33569	0.792503	0.28351	1.57142	-0.436942	2.82767
NaN	0.97263	0.905644	NaN	1.34841	1.09689	NaN	0.567109	0.437281	NaN	0.630148	0.576746	NaN	0.0678892	0.0585889	S	2	+	14-3-3 domain binding motif;Akt kinase substrate motif;Calmodulin-dependent protein kinase II substrate motif;ERK1,2 kinase substrate motif;G protein-coupled receptor kinase 1 substrate motif;Growth associated histone HI kinase substrate motif;GSK3 kinase substrate motif;GSK-3, ERK1, ERK2, CDK5 substrate motif;MAPKAPK1 kinase substrate motif;PKA kinase substrate motif;PKC kinase substrate motif;W…	regulation of alternative mRNA splicing, via spliceosome [GO:0000381]	nucleus [GO:0005634]	zinc ion binding [GO:0008270]	1	0.00220513	99.752	93.161	78.116	-0.27063	6218600000	4005700000	2212900000	1175	3.37235	0.0234583	2.60072	0.540208	1.93637	1.15941	1.67198	0.438956	2.82767	0.875898	9.03674	1.79875	-0.33569	0.792503	0.28351	1.57142	-0.436942	2.82767
NaN	0.409038	0.576377	NaN	0.165687	0.190299	NaN	NaN	0.559051	NaN	-0.153527	-0.0705119	NaN	1.14568	1.03083	S	2	+	14-3-3 domain binding motif;Calmodulin-dependent protein kinase II substrate motif;Casein kinase II substrate motif;DNA dependent Protein kinase substrate motif;G protein-coupled receptor kinase 1 substrate motif;GSK3 kinase substrate motif;PKA kinase substrate motif;PKC kinase substrate motif	epidermal growth factor receptor signaling pathway [GO:0007173];fibroblast growth factor receptor signaling pathway [GO:0008543];negative regulation of canonical Wnt signaling pathway [GO:0090090];negative regulation of smoothened signaling pathway [GO:0045879];negative regulation of transcription by RNA polymerase II [GO:0000122];negative regulation of transcription, DNA-templated [GO:0045892];n…	nucleus [GO:0005634];protein-containing complex [GO:0032991];transcription factor complex [GO:0005667]";"nucleoplasm [GO:0005654];nucleus [GO:0005634]	HMG box domain binding [GO:0071837];repressing transcription factor binding [GO:0070491];transcription corepressor activity [GO:0003714];transcription factor binding [GO:0008134]";"CRD domain binding [GO:0071906]	1	2.52002e-05	126.49	68.059	74.267	1.0717	381310000	237560000	143750000	283	3.37043	0.023299	2.46009	-1.20027	2.38335	-0.910261	-4.34294e-08	0	1.55551	-0.595547	6.39895	1.63764	-0.604727	1.18559	-0.314715	0	0.0663438	1.55551
-0.364877	-0.232197	-0.425481	0.0778957	0.137306	0.129462	-0.0766589	-0.0810432	-0.0713351	-0.0491464	-0.0382278	-0.125834	-0.330331	-0.167768	-0.500512	S	2	+	Casein kinase II substrate motif	border follicle cell migration [GO:0007298];cellularization [GO:0007349];centrosome cycle [GO:0007098];centrosome localization [GO:0051642];chitin-based cuticle development [GO:0040003];cystoblast division [GO:0007282];cytoplasmic microtubule organization [GO:0031122];dendrite morphogenesis [GO:0048813];establishment of epithelial cell apical/basal polarity [GO:0045198];establishment of Golgi loc…	cell cortex [GO:0005938];cytoplasm [GO:0005737];cytoplasmic dynein complex [GO:0005868];dynein complex [GO:0030286];fusome [GO:0045169];Golgi apparatus [GO:0005794];kinetochore [GO:0000776];microtubule [GO:0005874];microtubule associated complex [GO:0005875];ribonucleoprotein complex [GO:1990904]";"axon cytoplasm [GO:1904115];dynein complex [GO:0030286]	ATP binding [GO:0005524];ATP-dependent microtubule motor activity, minus-end-directed [GO:0008569];ATP-dependent microtubule motor activity, minus-end-directed [GO:0008569]";dynein intermediate chain binding [GO:0045505];dynein light chain binding [GO:0045503];dynein light intermediate chain binding [GO:0051959];microtubule motor activity [GO:0003777]";"ATP binding [GO:0005524];"ATPase activity, …	0.999021	2.90886e-38	222.19	205.6	175.77	-0.95446	36934000000	27448000000	9486700000	930	3.36615	0.0233265	1.23044	0.261801	1.99072	0.447758	1.25297	0.256525	0.0238856	-0.00798124	4.49802	1.88305	0.269782	2.79162	0.455739	2.00806	0.264506	0.0238856
-0.194711	-0.398102	-0.357443	-0.418728	-0.43775	-0.384429	-0.157966	-0.131453	-0.232968	-0.134111	-0.121417	-0.123679	-0.150914	-0.196839	-0.146658	S	5	+	b-Adrenergic Receptor kinase substrate motif;Casein kinase II substrate motif;Plk1 kinase substrate motif;Pyruvate dehydrogenase kinase substrate motif	nucleolus organization [GO:0007000]";"multicellular organism development [GO:0007275]	nucleus [GO:0005634];spindle [GO:0005819]";"nucleolus [GO:0005730]		1	1.1968e-76	278.19	265.22	155.98	-0.53045	118880000000	90792000000	28087000000	462	3.3646	0.0231111	1.09201	0.038401	3.42805	-0.248832	0.0971074	-0.00932562	1.11332	-0.151948	5.73049	1.42296	0.190349	0.688203	-0.096884	0.965611	0.142623	1.11332
-0.0159814	-0.346182	-0.193446	0.293028	0.303365	0.238258	-0.163253	-0.509547	-0.387474	-0.111249	-0.165048	-0.175567	-0.186859	-0.207201	-0.236403	T	1	+	Cdc2 kinase substrate motif;CDK1,2,4,6 kinase substrate motif;CDK5 kinase substrate motif;GSK-3, ERK1, ERK2, CDK5 substrate motif;WW domain binding motif		nucleus [GO:0005634]		1	4.11153e-06	126.71	120.52	97.741	-0.16428	23086000000	17401000000	5684800000	5	3.36118	0.02294	1.13967	0.059533	4.40679	0.488372	0.630007	-0.14327	0.0922084	0.0249513	6.26867	0.130386	0.0345817	2.04775	0.46342	0.532369	-0.168222	0.0922084
0.388904	0.296962	0.472229	-0.0562628	0.0123367	-0.127065	0.276026	0.0188693	0.0551403	-0.0638831	-0.0566703	-0.0447171	-0.0468501	-0.285026	-0.0938938	S	3	+	Casein kinase II substrate motif;G protein-coupled receptor kinase 1 substrate motif;GSK3 kinase substrate motif;MDC1 BRCT domain binding motif;PKA kinase substrate motif;Plk1 PBD domain binding motif;Pyruvate dehydrogenase kinase substrate motif	axon ensheathment [GO:0008366];protein autophosphorylation [GO:0046777];protein localization to cell cortex [GO:0072697];protein phosphorylation [GO:0006468];signal transduction by protein phosphorylation [GO:0023014];stress-activated protein kinase signaling cascade [GO:0031098];wing disc development [GO:0035220]";"activation of protein kinase activity [GO:0032147]	cytoplasm [GO:0005737]	protein kinase C activity [GO:0004697];protein serine/threonine kinase activity [GO:0004674]";"ATP binding [GO:0005524]	1	5.09288e-25	219.61	183.33	137.28	-0.088272	77787000000	53647000000	24140000000	384	3.35585	0.0229901	0.522487	0.086833	0.437558	0.0849263	1.12138	0.258602	2.39832	0.527955	4.47974	3.01005	-0.441122	2.62421	-0.443029	1.32744	-0.269353	2.39832
-0.429617	-0.609885	-0.655678	-0.417994	-0.398613	-0.368072	-0.0373402	-0.161364	-0.265718	0.489299	0.128606	0.129058	-0.410385	-0.13584	-0.491439	S	2	+	b-Adrenergic Receptor kinase substrate motif;Cdc2 kinase substrate motif;CDK kinase substrate motif;CDK1,2,4,6 kinase substrate motif;ERK1,2 kinase substrate motif;G protein-coupled receptor kinase 1 substrate motif;GSK-3, ERK1, ERK2, CDK5 substrate motif;MAPKAPK2 kinase substrate motif;WW domain binding motif	cellular response to starvation [GO:0009267];glutamine metabolic process [GO:0006541];mitochondrion organization [GO:0007005];pole plasm oskar mRNA localization [GO:0045451];positive regulation of oxidative phosphorylation [GO:1903862];positive regulation of transcription by RNA polymerase II [GO:0045944];regulation of transcription by RNA polymerase II [GO:0006357]";"cell differentiation [GO:003…	nucleus [GO:0005634]	sequence-specific DNA binding [GO:0043565]";"DNA-binding transcription factor activity [GO:0003700];"DNA-binding transcription factor activity, RNA polymerase II-specific [GO:0000981]	0.999572	6.4747e-39	245.1	223.65	96.067	-1.177	3784700000	2631200000	1153500000	153	3.33875	0.023549	1.67671	0.594875	0.170614	-0.0490054	0.688974	0.19108	0.791679	-0.219172	3.32797	2.37747	0.814048	1.13493	0.170167	1.89681	0.410253	0.791679
0.245548	0.321432	0.519178	0.761669	0.979441	0.470796	0.02041	-0.0970757	-0.0669421	-0.0331131	-0.154323	-0.104529	-0.0487791	0.327274	0.143171	S	3	+	BARD1 BRCT domain binding motif;Casein kinase II substrate motif	7-methylguanosine mRNA capping [GO:0006370]	nucleus [GO:0005634]	RNA binding [GO:0003723]";"mRNA (guanine-N7-)-methyltransferase activity [GO:0004482]	1	4.03591e-231	398.65	394.85	193.84	0.1202	102090000000	72698000000	29388000000	24	3.33707	0.0235728	0.976773	-0.237877	1.50777	0.596747	0.759164	-0.188424	0.749136	0.221498	3.99284	2.17762	-0.459374	1.04679	0.375249	2.00324	-0.409922	0.749136
-0.303913	-0.289349	-0.126538	0.871825	0.790857	0.534734	0.401905	0.46539	0.191369	-0.302876	0.152061	0.208214	-0.10702	0.00134945	0.151616	S	2	+	Casein kinase II substrate motif;G protein-coupled receptor kinase 1 substrate motif;GSK3 kinase substrate motif;MDC1 BRCT domain binding motif;Plk1 PBD domain binding motif	oocyte karyosome formation [GO:0030717];peptidyl-serine phosphorylation [GO:0018105];regulation of gene expression [GO:0010468];regulation of mRNA processing [GO:0050684];spindle assembly involved in female meiosis [GO:0007056];spindle assembly involved in female meiosis [GO:0007056]";spliceosomal complex assembly [GO:0000245]";"intracellular signal transduction [GO:0035556];"oocyte karyosome for…	nucleus [GO:0005634]";"cytoplasm [GO:0005737]	protein serine/threonine kinase activity [GO:0004674]";"ATP binding [GO:0005524]	0.996416	2.1642e-29	197.32	184.87	153.27	0.56225	14439000000	10401000000	4037800000	486	3.3146	0.0240962	0.0070283	0.00381775	2.3239	0.717157	1.40782	0.337573	1.27243	-0.255248	5.01118	0.6873	0.259066	2.94953	0.972405	2.38461	0.592821	1.27243
0.242638	0.36075	0.177216	-0.140979	-0.435688	-0.4393	0.399842	0.399532	0.0853631	0.284284	0.163002	0.272286	0.20194	0.249587	0.146648	S	3	+	Casein kinase II substrate motif	sex differentiation [GO:0007548]	extracellular region [GO:0005576]	carboxylic ester hydrolase activity [GO:0052689]	1	3.50317e-163	383.39	369.44	59.539	-0.49246	1404900000000	989710000000	415150000000	175	3.3121	0.0239238	0.344011	0.0404657	2.18974	-0.538047	0.366541	0.0955207	0.422523	0.0608095	3.32281	0.111424	-0.0203438	2.22249	-0.598857	0.106349	0.0347111	0.422523
-0.151805	-0.260149	-0.278681	0.0844706	0.164066	0.226634	-0.262426	-0.105338	-0.309431	-0.0648109	0.0433819	0.0650336	-0.17191	-0.0351024	-0.130706	S	2	+	ERK1,2 kinase substrate motif;G protein-coupled receptor kinase 1 substrate motif;GSK-3, ERK1, ERK2, CDK5 substrate motif;WW domain binding motif	protein polyubiquitination [GO:0000209];protein ubiquitination [GO:0016567];ubiquitin-dependent protein catabolic process [GO:0006511]";"dsRNA transport [GO:0033227]	nucleus [GO:0005634]";"cytoplasm [GO:0005737]	ubiquitin-protein transferase activity [GO:0004842]";"ubiquitin protein ligase activity [GO:0061630]	0.999205	7.50078e-05	109.07	87.298	87.363	0.42981	18768000000	14088000000	4680400000	1936	3.29997	0.0240189	1.04664	0.127108	2.02875	0.270963	0.698797	-0.113159	0.973216	-0.117639	4.74741	1.91215	0.244747	2.61404	0.388602	0.0203604	0.00447981	0.973216
NaN	NaN	-0.493114	NaN	-0.151458	-0.320131	NaN	-0.000404044	0.0935602	NaN	0.734395	0.722553	NaN	-0.129221	-0.116083	S	2	+	Casein kinase II substrate motif;G protein-coupled receptor kinase 1 substrate motif;PKA kinase substrate motif;PKC kinase substrate motif	asymmetric neuroblast division [GO:0055059];central nervous system development [GO:0007417];centriole replication [GO:0007099];centrosome cycle [GO:0007098];embryonic cleavage [GO:0040016];female meiosis chromosome segregation [GO:0016321];microtubule-based process [GO:0007017];midgut development [GO:0007494];peripheral nervous system development [GO:0007422];photoreceptor cell morphogenesis [GO:…	centrosome [GO:0005813];microtubule associated complex [GO:0005875];motile cilium [GO:0031514];pericentriolar material [GO:0000242];spindle pole [GO:0000922]";"centriole [GO:0005814];microtubule organizing center [GO:0005815]	microtubule binding [GO:0008017]	0.998332	6.30056e-13	179.78	170.81	155.97	0.319	845410000	638530000	206880000	1292	3.2943	0.024	3.9668	0.851126	0.504637	-0.113143	1.15251	0.16923	-4.34294e-08	0	5.62395	0	1.22159	0	0.257319	0	0.539692	0
NaN	-0.368115	-0.54141	NaN	0.225552	0.137798	NaN	-0.0729112	-0.145185	0.127633	0.0220818	-0.00757931	NaN	-0.38772	-0.499706	S	2	+	14-3-3 domain binding motif;Calmodulin-dependent protein kinase II substrate motif;Cdc2 kinase substrate motif;CDK kinase substrate motif;CDK1,2,4,6 kinase substrate motif;CLK1 kinase substrate motif;ERK1,2 kinase substrate motif;GSK-3, ERK1, ERK2, CDK5 substrate motif;PKA kinase substrate motif;PKC kinase substrate motif;WW domain binding motif;ZIP kinase substrate motif	protein refolding [GO:0042026]";"mRNA splicing, via spliceosome [GO:0000398]	cytosol [GO:0005829];nucleoplasm [GO:0005654];nucleus [GO:0005634];precatalytic spliceosome [GO:0071011]";"catalytic step 2 spliceosome [GO:0071013]	unfolded protein binding [GO:0051082]";"peptidyl-prolyl cis-trans isomerase activity [GO:0003755]	1	0.000720041	95.822	59.486	40.714	0.31829	2552200000	1852900000	699250000	642	3.27902	0.024537	2.27206	0.491091	1.89644	0.625388	1.42666	0.334665	0.0341024	-0.0110497	5.62926	2.03517	0.502141	1.64772	0.636438	1.17734	0.345714	0.0341024
0.138183	0.324895	0.140161	0.0515593	0.259778	0.054024	0.344116	0.466736	0.437509	0.132561	0.0488894	0.0223821	-0.0274575	-0.130595	-0.0430841	S	3	+	b-Adrenergic Receptor kinase substrate motif;Casein kinase II substrate motif;G protein-coupled receptor kinase 1 substrate motif;PKA kinase substrate motif;PKC kinase substrate motif	translational elongation [GO:0006414]";"cytoplasmic translation [GO:0002181]	cytosolic ribosome [GO:0022626]";"cytosolic large ribosomal subunit [GO:0022625]	structural constituent of ribosome [GO:0003735]	1	5.1205e-92	284.88	284.88	121.33	-0.28454	284280000000	195440000000	88837000000	100	3.27818	0.0243486	1.3655	0.13499	1.16682	0.188832	3.22795	0.483166	1.73562	0.268125	7.49589	0.882817	-0.133135	0.355986	-0.0792925	1.39086	0.215041	1.73562
-0.795217	-1.94485	-1.82157	-0.00865107	-0.279898	-0.288076	-0.0164607	-0.345863	-0.235067	0.0879751	0.0196142	0.0540464	-0.787955	-1.0992	-1.27482	S	2	+	Casein kinase I substrate motif;Cdc2 kinase substrate motif;CDK kinase substrate motif;CDK1,2,4,6 kinase substrate motif;ERK1,2 kinase substrate motif;GSK-3, ERK1, ERK2, CDK5 substrate motif;WW domain binding motif	mitotic DNA replication checkpoint [GO:0033314]	nucleus [GO:0005634]		1	1.88745e-109	321.9	282.96	253.23	1.9314	23738000000	17050000000	6687700000	444	3.27174	0.0244	2.81704	1.10787	2.15222	0.861781	2.11513	0.854859	0.524402	-0.466557	7.60879	1.90293	1.57442	1.6175	1.32834	1.60573	1.32142	0.524402
-0.551086	-1.11326	-1.07845	-0.0169511	0.117266	0.321794	1.05413	0.550846	0.463026	NaN	0.233326	0.126587	NaN	-0.275747	-0.0941704	S	3	+	Casein kinase II substrate motif;MDC1 BRCT domain binding motif;Plk1 PBD domain binding motif;Pyruvate dehydrogenase kinase substrate motif	negative regulation of histone H3-K27 methylation [GO:0061086];negative regulation of histone H4-K16 acetylation [GO:2000619];negative regulation of transcription by RNA polymerase II [GO:0000122];negative regulation of transcription, DNA-templated [GO:0045892];positive regulation of methylation-dependent chromatin silencing [GO:0090309];positive regulation of Notch signaling pathway [GO:0045747]…	transcription factor complex [GO:0005667]";transcriptional repressor complex [GO:0017053];"nucleus [GO:0005634];nucleus [GO:0005634]	DNA-binding transcription factor activity [GO:0003700];transcription corepressor activity [GO:0003714];transcription factor binding [GO:0008134];transcription regulatory region DNA binding [GO:0044212]";"chromatin binding [GO:0003682];DNA binding [GO:0003677]	0.999022	9.28602e-15	145.19	135.24	120.93	0.73034	4052900000	2979900000	1073000000	69	3.25783	0.0248288	1.12993	0.364915	0.963283	0.325662	1.41516	0.874294	1.23376	-0.729308	4.74213	1.71287	1.09422	2.15624	1.05497	2.46213	1.6036	1.23376
-0.426065	-0.499782	-0.656592	-0.0559982	-0.122191	-0.0551541	-0.129284	-0.492927	-0.464486	-0.162899	0.174316	0.0624642	-0.612256	-0.606913	-0.578199	S	2	+	Casein kinase II substrate motif;ERK1, ERK2, SAPK, CDK5 and GSK3 kinase substrate motif;ERK1,2 kinase substrate motif;Growth associated histone HI kinase substrate motif;GSK-3, ERK1, ERK2, CDK5 substrate motif;WW domain binding motif	axonogenesis [GO:0007409];dendrite morphogenesis [GO:0048813];lumen formation, open tracheal system [GO:0035149];microtubule cytoskeleton organization [GO:0000226];microtubule-based movement [GO:0007018];mitotic cell cycle [GO:0000278];mRNA transport [GO:0051028];oogenesis [GO:0048477];regulation of dendrite morphogenesis [GO:0048814]";"axo-dendritic transport [GO:0008088]	cytoplasmic dynein complex [GO:0005868];dynein complex [GO:0030286];neuron projection [GO:0043005]";"cytoplasm [GO:0005737]	microtubule motor activity [GO:0003777]";"dynein heavy chain binding [GO:0045504]	0.998483	4.27436e-18	198.6	183.71	139.16	0.049629	8719400000	6629300000	2090100000	337	3.25298	0.0248214	2.47721	0.62375	4.53331	0.521342	0.945278	0.23689	0.447976	0.0716425	8.40378	1.99611	0.552107	2.48598	0.449699	0.539965	0.165248	0.447976
-0.000558491	0.158725	NaN	0.454082	0.468647	0.345964	0.186074	NaN	0.105276	-0.191883	-0.0894209	-0.0956971	-0.140709	NaN	NaN	S	3	+	Casein kinase II substrate motif;MDC1 BRCT domain binding motif;Plk1 PBD domain binding motif	microtubule-based process [GO:0007017];mitotic cell cycle [GO:0000278]";"centrosome cycle [GO:0007098]	microtubule [GO:0005874];microtubule associated complex [GO:0005875];midbody [GO:0030496];spindle [GO:0005819]";"cytoplasm [GO:0005737]	microtubule binding [GO:0008017]	0.779299	1.50057e-51	218.19	218.19	209.4	0.044447	6129200000	4193800000	1935500000	710	3.24652	0.024885	-4.34294e-08	0	-4.34294e-08	0	-4.34294e-08	0	-4.34294e-08	0	0	1.1676	-0.20475	1.67056	0.343815	0.272798	0.0665919	0
NaN	0.58325	0.47868	NaN	0.0626104	0.0781298	0.0621218	0.126421	0.0272349	NaN	-0.143466	0.129613	NaN	1.46438	1.05333	S	2	+	ERK1,2 kinase substrate motif;Growth associated histone HI kinase substrate motif;GSK-3, ERK1, ERK2, CDK5 substrate motif;MDC1 BRCT domain binding motif;PKA kinase substrate motif;PKC kinase substrate motif;Plk1 PBD domain binding motif;WW domain binding motif				0.999426	6.99269e-83	308.03	226.5	293.28	0.68935	4730400000	3075600000	1654900000	2135	3.23972	0.025193	1.44414	-1.26578	1.54263	-1.18848	2.31313	-1.18693	1.12257	-0.727887	6.42247	1.1766	-0.537892	1.8889	-0.460595	2.46415	-0.459039	1.12257
-0.866861	-1.0627	-0.754942	0.105678	0.150787	-0.0766194	-0.425367	NaN	NaN	-0.187001	-0.17377	NaN	NaN	-0.354087	NaN	S	3	+	Cdc2 kinase substrate motif;CDK kinase substrate motif;CDK1,2,4,6 kinase substrate motif;ERK1,2 kinase substrate motif;G protein-coupled receptor kinase 1 substrate motif;GSK-3, ERK1, ERK2, CDK5 substrate motif;MAPKAPK2 kinase substrate motif;WW domain binding motif		nucleoplasm [GO:0005654]";"cytosol [GO:0005829]	alditol:NADP+ 1-oxidoreductase activity [GO:0004032];indanol dehydrogenase activity [GO:0047718];oxidoreductase activity [GO:0016491]";"alcohol dehydrogenase (NADP+) activity [GO:0008106]	0.999998	9.37573e-70	269.85	255.12	131.82	0.84574	1094800000	820410000	274370000	214	3.23641	0.0252348	-4.34294e-08	0	-4.34294e-08	0	-4.34294e-08	0	-4.34294e-08	0	0	2.06258	0.71445	2.95884	0.954784	0	0.469468	0
0.0718217	0.0125915	-0.0172389	0.451291	0.802292	0.456942	0.363458	0.176944	0.198302	0.0664761	0.120706	0.0528337	0.313799	0.34722	0.408713	S	2	+	G protein-coupled receptor kinase 1 substrate motif	germ cell development [GO:0007281];monocarboxylic acid transport [GO:0015718]";"ectopic germ cell programmed cell death [GO:0035234]	integral component of membrane [GO:0016021]	monocarboxylic acid transmembrane transporter activity [GO:0008028]	1	2.09013e-233	424.24	375.1	379.32	-0.22014	5475000000	3838100000	1637000000	431	3.23383	0.0251724	2.87327	-0.276572	0.829705	0.213598	0.780854	-0.110343	3.0274	-0.334186	7.51123	0.797275	0.0576138	1.99992	0.547784	1.59253	0.223843	3.0274
0.402321	0.498671	0.503336	0.0498072	-0.268145	-0.0938473	0.178166	-0.266689	-0.347291	-0.619105	-0.514118	-0.681027	-0.282622	0.167821	0.0526245	S	3	+	Casein kinase II substrate motif;G protein-coupled receptor kinase 1 substrate motif;Pyruvate dehydrogenase kinase substrate motif	mRNA splicing, via spliceosome [GO:0000398];pole cell development [GO:0007277];pole plasm mRNA localization [GO:0019094];pole plasm oskar mRNA localization [GO:0045451]";"anterior/posterior pattern specification [GO:0009952]	cytoplasm [GO:0005737];cytosol [GO:0005829];precatalytic spliceosome [GO:0071011];ribonucleoprotein complex [GO:1990904]";"catalytic step 2 spliceosome [GO:0071013]		1	3.4556e-108	320.9	300.65	221.51	0.13456	290770000000	218170000000	72600000000	347	3.22501	0.0252991	1.81625	-0.584025	0.195914	-0.0833364	0.230284	-0.124546	1.60989	0.488835	3.85234	4.27529	-1.07286	2.37331	-0.572171	1.67368	-0.61338	1.60989
-0.33962	NaN	NaN	0.218718	0.214561	-0.00955338	-0.268766	-0.356716	-0.255209	-0.366648	-0.37035	-0.452862	-0.114798	NaN	NaN	S	2	+	ERK1,2 kinase substrate motif;GSK-3, ERK1, ERK2, CDK5 substrate motif;PKA kinase substrate motif;WW domain binding motif	regulation of transcription, DNA-templated [GO:0006355]	Sin3-type complex [GO:0070822]";"nucleus [GO:0005634]		1	4.60938e-24	204.33	189.89	129.22	1.6087	1799700000	1364500000	435190000	438	3.22442	0.0251017	-4.34294e-08	0	-4.34294e-08	0	-4.34294e-08	0	-4.34294e-08	0	0	0	-0.0570003	0	0.480862	0	0.046056	0
-0.0414105	0.202851	-0.103978	-0.628064	-0.534786	-0.582135	-0.59618	-0.522459	-0.223008	-0.597175	-0.572051	-0.521111	NaN	-0.0976965	0.0227241	S	3	+	Casein kinase I substrate motif;Casein kinase II substrate motif;Cdc2 kinase substrate motif;CDK kinase substrate motif;CDK1,2,4,6 kinase substrate motif;ERK1,2 kinase substrate motif;G protein-coupled receptor kinase 1 substrate motif;Growth associated histone HI kinase substrate motif;GSK3 kinase substrate motif;GSK-3, ERK1, ERK2, CDK5 substrate motif;WW domain binding motif	positive regulation of GTPase activity [GO:0043547];receptor-mediated endocytosis [GO:0006898];regulation of Ras protein signal transduction [GO:0046578];small GTPase mediated signal transduction [GO:0007264]";"multicellular organism development [GO:0007275]	membrane [GO:0016020]";"intracellular [GO:0005622]	Ral GTPase binding [GO:0017160]";"GTPase activator activity [GO:0005096]	0.996007	1.76452e-51	232.68	224.54	224.39	-0.083229	7194200000	5905100000	1289100000	78	3.22113	0.025042	2.65334	-0.525959	2.6182	-0.544175	1.11751	-0.409729	0.16108	0.0566402	6.55012	2.42498	-0.5826	2.45502	-0.600816	1.46614	-0.46637	0.16108
NaN	-1.02868	-0.783295	-0.915038	-0.775057	-0.829372	-0.418632	-0.517711	-0.508495	0.158238	-0.145864	-0.203367	-0.332602	-0.491987	-0.713811	S	2	+	Calmodulin-dependent protein kinase II substrate motif;Chk1 kinase substrate motif;PKA kinase substrate motif;PKC kinase substrate motif	protein ubiquitination [GO:0016567];ubiquitin-dependent protein catabolic process [GO:0006511]";"protein linear polyubiquitination [GO:0097039]	ubiquitin ligase complex [GO:0000151]	ligase activity [GO:0016874];ubiquitin conjugating enzyme activity [GO:0061631];ubiquitin protein ligase binding [GO:0031625]";"ATP binding [GO:0005524]	1	0.000306875	101.39	73.183	55.467	0.28705	863260000	650420000	212840000	12	3.19986	0.0256667	1.33431	0.449136	1.3008	-0.327022	0.0971261	0.0311875	0.986739	-0.393185	3.71897	1.79294	0.842321	0.240297	0.0661627	1.61886	0.424372	0.986739
0.389636	0.75575	0.835737	0.352515	0.4289	0.834125	0.733071	0.800666	0.612789	-0.186388	-0.238603	-0.21732	NaN	0.310663	0.372536	S	2	+	MAPKAPK2 kinase substrate motif;PKA kinase substrate motif;PKC kinase substrate motif	regulation of embryonic development [GO:0045995];response to bacterium [GO:0009617];sex differentiation [GO:0007548]";"embryo development ending in birth or egg hatching [GO:0009792]	P granule [GO:0043186]";"extracellular region [GO:0005576];extracellular region [GO:0005576]	carboxylic ester hydrolase activity [GO:0052689]	1	3.58934e-13	192.54	144.42	169.98	0.36185	32962000000	23228000000	9733800000	24	3.1996	0.0254545	3.45377	-0.555703	0.413998	0.196914	1.81585	0.373909	0.763	0.318775	6.44662	2.49636	-0.874478	0.236139	-0.121861	0.137728	0.0551344	0.763
-0.0979585	-0.360834	-0.306908	0.376424	0.21506	0.136867	-0.171497	-0.0902379	-0.219377	-0.00642973	-0.0545531	-0.0506541	-0.0462407	-0.152881	-0.138307	S	2	+	Casein kinase II substrate motif;DNA dependent Protein kinase substrate motif;ERK1,2 kinase substrate motif;GSK-3, ERK1, ERK2, CDK5 substrate motif;WW domain binding motif		nucleus [GO:0005634]	metal ion binding [GO:0046872]	0.98721	6.00122e-47	242.5	230.84	138.15	-0.029816	20951000000	15754000000	5197100000	335	3.19355	0.0254918	0.958067	0.075264	1.98314	0.35526	0.403008	-0.0478943	0.755652	-0.142757	4.09987	1.25362	0.218021	2.01957	0.498017	0.462771	0.0948627	0.755652
-0.251983	-0.707866	-0.342004	-0.258622	-0.316811	-0.293268	-0.816796	-0.978127	-0.838861	-0.315214	-0.280374	-0.290626	-0.390481	-0.439368	-0.322969	S	2	+	b-Adrenergic Receptor kinase substrate motif;ERK1,2 kinase substrate motif;Growth associated histone HI kinase substrate motif;GSK-3, ERK1, ERK2, CDK5 substrate motif;PKA kinase substrate motif;PKC kinase substrate motif;WW domain binding motif	intracellular mRNA localization involved in pattern specification process [GO:0060810];maternal specification of dorsal/ventral axis, oocyte, germ-line encoded [GO:0007311];pole plasm oskar mRNA localization [GO:0045451];regulation of translation [GO:0006417];wound healing [GO:0042060]";"chromosome organization [GO:0051276]	protein-containing complex [GO:0032991]	mRNA binding [GO:0003729]	1	1.32439e-14	166.7	139.61	110.6	0.64081	13769000000	11195000000	2574300000	47	3.1924	0.0253333	1.1838	0.0888679	1.17981	0.0947057	2.90428	-0.493656	0.126959	-0.0496786	5.39485	0.422831	0.138546	0.441343	0.144384	1.39619	-0.443977	0.126959
-0.841532	-0.940684	-0.8259	0.0194329	0.356718	-0.0545011	-0.496149	-0.112268	-0.184065	-0.339008	0.0853912	-0.00340989	-0.848531	-0.428246	-0.59616	S	2	+	b-Adrenergic Receptor kinase substrate motif;BARD1 BRCT domain binding motif;Casein kinase I substrate motif;Casein kinase II substrate motif;G protein-coupled receptor kinase 1 substrate motif	behavioral response to ethanol [GO:0048149];long-term memory [GO:0007616];negative regulation of translation [GO:0017148];oogenesis [GO:0048477];ovarian follicle cell development [GO:0030707];positive regulation of filopodium assembly [GO:0051491]";"axon midline choice point recognition [GO:0016199]	axonal growth cone [GO:0044295];cytoplasm [GO:0005737];filopodium [GO:0030175];neuronal cell body [GO:0043025]";"axon [GO:0030424]	ribosome binding [GO:0043022];translation initiation factor binding [GO:0031369]";"ribosomal small subunit binding [GO:0043024]	1	6.34158e-123	347.59	332.43	277.72	-2.8847	44781000000	34029000000	10752000000	414	3.18618	0.0253065	1.41102	0.538637	1.84907	0.731529	0.995251	0.360152	0.897662	-0.245059	5.153	2.36862	0.783696	2.75491	0.976588	2.09852	0.605211	0.897662
NaN	-0.994854	-1.09834	NaN	-0.20933	-0.471675	NaN	-0.0244163	0.131832	NaN	0.066537	0.00654828	NaN	-0.609221	-0.522033	S	2	+	Casein kinase I substrate motif;MDC1 BRCT domain binding motif;Plk1 PBD domain binding motif	chromosome condensation [GO:0030261];DNA topological change [GO:0006265];male meiosis chromosome segregation [GO:0007060];meiotic cell cycle [GO:0051321];metaphase plate congression [GO:0051310];mitotic cell cycle [GO:0000278];mitotic chromosome condensation [GO:0007076];mitotic sister chromatid segregation [GO:0000070];sister chromatid segregation [GO:0000819]";"chromatin silencing [GO:0006342]	chromosome [GO:0005694];cytoplasm [GO:0005737];nucleus [GO:0005634]";"CHRAC [GO:0008623]	chromatin binding [GO:0003682];DNA binding [GO:0003677];DNA topoisomerase type II (ATP-hydrolyzing) activity [GO:0003918];four-way junction DNA binding [GO:0000400];metal ion binding [GO:0046872];mRNA binding [GO:0003729];rDNA binding [GO:0000182];satellite DNA binding [GO:0003696]";"ATP binding [GO:0005524]	1	7.75017e-09	157.7	143.07	115.83	-0.2044	4428300000	3328900000	1099400000	1410	3.16772	0.025808	2.11726	0.602169	0.610952	0.225124	1.69389	0.619335	1.71625	-0.48097	6.13835	2.51784	1.08314	1.42431	0.706094	2.14419	1.1003	1.71625
-0.613068	-0.472844	-0.614651	-0.760599	-0.674504	-0.557117	-0.44705	-0.130606	-0.0628641	-0.0736791	0.47932	0.320136	-0.316232	-0.446014	-0.22327	S	2	+	ERK1,2 kinase substrate motif;G protein-coupled receptor kinase 1 substrate motif;GSK-3, ERK1, ERK2, CDK5 substrate motif;MDC1 BRCT domain binding motif;PKA kinase substrate motif;PKC kinase substrate motif;Plk1 PBD domain binding motif;WW domain binding motif	axon guidance [GO:0007411];blastoderm segmentation [GO:0007350];chromatin remodeling [GO:0006338];determination of adult lifespan [GO:0008340];DNA repair [GO:0006281];imaginal disc-derived wing morphogenesis [GO:0007476];locomotion [GO:0040011];negative regulation of transcription by RNA polymerase II [GO:0000122];negative regulation of transcription, DNA-templated [GO:0045892];neuron remodeling …	nucleus [GO:0005634]";"nucleoplasm [GO:0005654]	DNA-dependent ATPase activity [GO:0008094]";"ATP binding [GO:0005524];"ATP-dependent DNA helicase activity [GO:0004003]	0.999997	9.03086e-30	208.89	208.89	181.98	0.58047	25271000000	21808000000	3462800000	3801	3.16594	0.0256667	1.49526	0.570431	1.73254	-0.335568	0.354679	0.114999	1.39153	-0.238349	4.97401	2.04114	0.80878	0.573733	-0.0972189	1.29985	0.353348	1.39153
-0.791944	-1.02991	-0.985125	-0.518523	0.287414	0.020529	-0.00339342	-0.0872895	0.00980546	-0.0979481	0.116483	0.157979	-0.565308	-0.477438	-0.424481	S	2	+	Casein kinase II substrate motif;ERK1,2 kinase substrate motif;GSK-3, ERK1, ERK2, CDK5 substrate motif;MAPKAPK2 kinase substrate motif;MDC1 BRCT domain binding motif;Plk1 PBD domain binding motif;WW domain binding motif	regulation of locomotor rhythm [GO:1904059]";"negative regulation of motor neuron apoptotic process [GO:2000672]	cytoplasm [GO:0005737]	Hsp90 protein binding [GO:0051879]";"Hsp70 protein binding [GO:0030544]	0.998823	2.32594e-42	246.27	222.84	246.27	-0.90047	39235000000	31904000000	7331500000	77	3.15631	0.0260157	2.44644	0.547914	0.805175	0.418882	3.08184	0.462116	2.22471	-0.446583	8.55816	3.11516	0.994496	1.59971	0.865465	3.48469	0.908699	2.22471
-0.856515	-0.766094	-1.71049	0.612855	0.287511	0.11336	0.860332	0.304044	0.334063	0.316251	0.139369	-0.0666677	0.0614251	0.476584	0.410027	S	2	+	b-Adrenergic Receptor kinase substrate motif;Casein kinase I substrate motif;Casein kinase II substrate motif	gastrulation [GO:0007369]	integral component of membrane [GO:0016021];vesicle [GO:0031982]";"cell surface [GO:0009986]		1	3.15804e-66	261.74	256.62	138.23	-2.4002	18151000000	13136000000	5015400000	478	3.15207	0.026	0.476364	-0.186362	0.0381162	0.0218963	0.342318	0.183467	1.91883	-1.42704	2.77563	1.74501	1.24068	1.90855	1.44894	1.99518	1.61051	1.91883
0.943203	0.925854	0.755064	0.62919	0.398795	0.413735	0.705932	0.545057	0.443314	0.401292	0.286999	0.288296	0.508543	0.412499	0.420645	S	2	+	ATM kinase substrate motif;b-Adrenergic Receptor kinase substrate motif;Casein kinase II substrate motif;DNA dependent Protein kinase substrate motif;G protein-coupled receptor kinase 1 substrate motif	regulation of transcription, DNA-templated [GO:0006355]";"imaginal disc-derived wing morphogenesis [GO:0007476]	nucleus [GO:0005634]	DNA-binding transcription factor activity [GO:0003700]";"DNA binding [GO:0003677]	1	6.2848e-128	329.43	304.64	247.92	-0.15127	11556000000	7469100000	4086700000	96	3.14788	0.0258915	1.17281	-0.1217	0.154849	0.0333441	0.644166	0.117539	2.4985	0.427478	4.47033	2.82293	-0.549178	1.83587	-0.394134	1.47808	-0.309939	2.4985
NaN	0.836632	0.535655	NaN	0.530147	0.840443	NaN	0.313284	0.192285	NaN	0.187799	0.171562	NaN	1.6979	1.86683	S	2	+	Casein kinase II substrate motif;ERK1,2 kinase substrate motif;GSK-3, ERK1, ERK2, CDK5 substrate motif;Pyruvate dehydrogenase kinase substrate motif;WW domain binding motif			zinc ion binding [GO:0008270]";"transferase activity [GO:0016740]	0.999888	9.14814e-48	250.86	220.51	208.27	-0.52889	1865200000	1137000000	728220000	490	3.14125	0.0260462	2.55417	-1.60268	1.60274	-1.09707	2.33893	-1.52958	1.62164	-1.09622	8.11748	1.1063	-0.506463	0.00120687	-0.000848264	0.9349	-0.433358	1.62164
0.093278	0.593975	0.791304	0.538006	0.465653	0.455994	-0.282515	0.351215	-0.210046	-0.0374542	0.0366536	-0.116668	NaN	1.43378	1.3293	S	4	+		gene silencing by miRNA [GO:0035195];habituation [GO:0046959];ovarian follicle cell development [GO:0030707];pole cell formation [GO:0007279];regulation of defense response to virus [GO:0050688];regulation of olfactory learning [GO:0090328]";"cytoplasmic mRNA processing body assembly [GO:0033962]	P granule [GO:0043186]";P-body [GO:0000932];"cytoplasm [GO:0005737]	helicase activity [GO:0004386];RNA binding [GO:0003723]";"ATP binding [GO:0005524]	1	1.26041e-61	205.18	203.15	94.776	0.37056	21590000000	14955000000	6635300000	458	3.13045	0.0268702	3.59824	-1.4207	3.38655	-0.894988	1.91917	-1.42865	1.33295	-0.888687	10.2369	1.17757	-0.532009	0.00991412	-0.00630124	0.870853	-0.539968	1.33295
-0.158104	-0.0930932	-0.153645	-0.215595	-0.298928	-0.344166	-0.084105	-0.0852606	-0.195278	-0.0510737	-0.04635	-0.0271077	-0.0488376	0.0662791	0.158983	S	3	+	ERK1,2 kinase substrate motif;GSK-3, ERK1, ERK2, CDK5 substrate motif;WW domain binding motif	mRNA splicing, via spliceosome [GO:0000398]	precatalytic spliceosome [GO:0071011]";"catalytic step 2 spliceosome [GO:0071013]	metal ion binding [GO:0046872]	1	7.94595e-209	382.65	375.26	257.71	0.49858	73864000000	54118000000	19747000000	129	3.07454	0.0292727	0.762142	-0.100319	2.08343	-0.345038	1.20212	-0.180356	1.41716	-0.193755	5.46486	1.8658	0.0934366	1.60787	-0.151283	0.114723	0.0133993	1.41716
0.36275	0.296962	0.472229	-0.0869831	0.0334066	-0.206642	0.284299	0.0188693	0.00270795	-0.099962	-0.00315659	0.0331445	-0.201151	-0.285026	-0.0938938	S	3	+	b-Adrenergic Receptor kinase substrate motif;Casein kinase II substrate motif	axon ensheathment [GO:0008366];protein autophosphorylation [GO:0046777];protein localization to cell cortex [GO:0072697];protein phosphorylation [GO:0006468];signal transduction by protein phosphorylation [GO:0023014];stress-activated protein kinase signaling cascade [GO:0031098];wing disc development [GO:0035220]";"activation of protein kinase activity [GO:0032147]	cytoplasm [GO:0005737]	protein kinase C activity [GO:0004697];protein serine/threonine kinase activity [GO:0004674]";"ATP binding [GO:0005524]	0.999914	5.09288e-25	219.61	183.33	168.46	0.031451	79720000000	55807000000	23913000000	386	3.07348	0.0291429	1.17396	0.170032	0.529455	0.106617	1.2967	0.295316	2.78868	0.570671	5.78879	2.46027	-0.400639	2.24156	-0.464054	1.236	-0.275355	2.78868
NaN	1.05093	1.29778	NaN	-0.163904	0.0806967	NaN	0.28111	0.402368	NaN	0.220638	0.247553	NaN	0.800745	0.753605	S	2	+	Casein kinase II substrate motif			zinc ion binding [GO:0008270]";"nucleic acid binding [GO:0003676]	0.885124	0.00914766	71.425	63.764	71.425	-0.035067	1173100000	779610000	393540000	142	3.06977	0.0291493	2.60409	-0.543079	1.6504	-0.818778	1.66561	-0.435436	1.05949	0.397177	6.9796	1.76973	-0.940257	1.70301	-1.21596	1.58154	-0.832613	1.05949
-0.393383	-0.852849	-0.804676	NaN	-0.155361	-0.267018	-0.00851701	-0.268495	-0.189358	0.286795	0.244147	0.116069	-0.352321	-0.551347	-0.729085	S	3	+	Casein kinase II substrate motif	translational elongation [GO:0006414]	eukaryotic translation elongation factor 1 complex [GO:0005853]	translation elongation factor activity [GO:0003746]	1	0	537.5	517.62	194.82	1.7316	29413000000	18556000000	10857000000	137	3.0679	0.0290519	2.49306	0.759921	0.96814	0.333062	1.3629	0.388794	0.313102	-0.139385	5.13721	2.36218	0.899306	1.0381	0.472447	1.48447	0.528179	0.313102
-0.110964	-0.275572	-0.373667	0.290535	0.368713	0.12499	-0.6975	-0.852296	-1.15725	-0.386396	0.0365479	-0.256852	-0.204072	-0.500223	0.0868833	S	2	+	14-3-3 domain binding motif;Aurora-A kinase substrate motif;Calmodulin-dependent protein kinase II substrate motif;Casein kinase II substrate motif;MAPKAPK2 kinase substrate motif;PAK2 kinase substrate motif;Phosphorylase kinase substrate motif;PKA kinase substrate motif;PKC epsilon kinase substrate motif;PKC kinase substrate motif				1	1.01837e-13	193.14	128.35	146.43	0.62687	3104700000	2386200000	718450000	208	3.06599	0.0289559	0.00555632	0.00357088	1.19305	0.467216	1.48862	-0.696545	0.0911616	-0.047597	2.77839	0.127924	0.0511679	2.09469	0.514813	1.85605	-0.648948	0.0911616
0.498584	1.04333	1.10501	NaN	0.643856	0.179256	0.270252	0.0223095	0.220952	-0.317818	-0.343148	-0.604367	0.0197915	-0.437021	-0.117707	S	2	+	Casein kinase II substrate motif;G protein-coupled receptor kinase 1 substrate motif;Pyruvate dehydrogenase kinase substrate motif	cellular response to ethanol [GO:0071361];circadian rhythm [GO:0007623];germ cell development [GO:0007281];negative regulation of Ras protein signal transduction [GO:0046580];positive regulation of Notch signaling pathway [GO:0045747];positive regulation of protein localization to membrane [GO:1905477];regulation of actin cytoskeleton organization [GO:0032956];regulation of actin cytoskeleton reo…	cytoskeleton [GO:0005856];cytosol [GO:0005829];plasma membrane [GO:0005886]";"cytoplasm [GO:0005737]	kinase activity [GO:0016301];Notch binding [GO:0005112];protein kinase A regulatory subunit binding [GO:0034237]";"actin filament binding [GO:0051015];kinase activity [GO:0016301]	0.999925	6.57354e-13	155.24	122.5	153.04	0.012731	1966200000	1331600000	634670000	435	3.0636	0.0288467	0.676853	-0.243466	1.01763	0.589868	1.05897	0.349483	1.96723	1.06062	4.72068	2.44051	-1.30409	0.661159	-0.470752	1.57799	-0.711137	1.96723
0.330916	-0.0887294	0.00898703	1.02157	0.842188	0.702616	0.493622	0.461775	0.333243	0.233774	0.204513	0.214682	0.100978	0.457756	0.286151	S	2	+	Casein kinase II substrate motif	basal protein localization [GO:0045175];central nervous system development [GO:0007417];chromosome organization [GO:0051276];cytoplasmic mRNA processing body assembly [GO:0033962];cytoplasmic U snRNP body assembly [GO:1990194];embryo development ending in birth or egg hatching [GO:0009792];excitatory postsynaptic potential [GO:0060079];larval development [GO:0002164];larval locomotory behavior [G…	cytoplasm [GO:0005737];cytoplasmic U snRNP body [GO:0071254];Gemini of coiled bodies [GO:0097504];I band [GO:0031674];neuromuscular junction [GO:0031594];nucleus [GO:0005634];plasma membrane [GO:0005886];postsynapse [GO:0098794];SmD-containing SMN-Sm protein complex [GO:0034730];SMN complex [GO:0032797];SMN-Gemin2 complex [GO:0034718];spliceosomal complex [GO:0005681];Z disc [GO:0030018]";"Cajal …	identical protein binding [GO:0042802];RNA binding [GO:0003723]";"alpha-actinin binding [GO:0051393]	0.999858	2.11493e-29	208.37	200.86	198.77	0.28749	22178000000	14734000000	7444200000	2	3.05961	0.0288406	0.244487	-0.0639719	1.84529	0.573831	0.577528	0.147918	0.534059	-0.197904	3.20136	0.454301	0.133932	2.10109	0.771735	1.19592	0.345822	0.534059
0.0539524	-0.0855314	0.0532849	0.360029	0.539419	0.380972	-0.077476	-0.143363	-0.261715	0.29331	0.224586	0.233971	0.325393	-0.0280682	-0.00508564	S	3	+	b-Adrenergic Receptor kinase substrate motif;Casein kinase I substrate motif;Cdc2 kinase substrate motif;CDK kinase substrate motif;CDK1,2,4,6 kinase substrate motif;ERK1,2 kinase substrate motif;G protein-coupled receptor kinase 1 substrate motif;GSK-3, ERK1, ERK2, CDK5 substrate motif;WW domain binding motif	base-excision repair [GO:0006284];DNA repair [GO:0006281]	intracellular [GO:0005622];nucleus [GO:0005634]	class I DNA-(apurinic or apyrimidinic site) endonuclease activity [GO:0140078];class II DNA-(apurinic or apyrimidinic site) endonuclease activity [GO:0052720];DNA binding [GO:0003677];DNA-(apurinic or apyrimidinic site) endonuclease activity [GO:0003906];double-stranded DNA 3'-5' exodeoxyribonuclease activity [GO:0008311];endonuclease activity [GO:0004519];metal ion binding [GO:0046872];metal ion…	1	2.29048e-165	362.52	355.02	178.46	0.8918	53949000000	38361000000	15588000000	274	3.0582	0.0286763	0.588824	0.15321	1.21436	0.329394	0.957571	-0.258264	0.296784	-0.0901777	3.05754	2.05039	0.243387	2.33837	0.419571	1.11157	-0.168087	0.296784
NaN	0.171613	0.0436597	NaN	-0.00160456	0.100668	NaN	-0.488353	-0.421668	NaN	-0.0980555	-0.218999	NaN	0.285971	0.376324	S	2	+	14-3-3 domain binding motif;Akt kinase substrate motif;Calmodulin-dependent protein kinase II substrate motif;MAPKAPK1 kinase substrate motif;PAK2 kinase substrate motif;PKA kinase substrate motif;PKC epsilon kinase substrate motif;PKC kinase substrate motif	endocytosis [GO:0006897];endosome transport via multivesicular body sorting pathway [GO:0032509];ovarian follicle cell development [GO:0030707];plasma membrane organization [GO:0007009];regulation of multivesicular body size involved in endosome transport [GO:0010797];wound healing [GO:0042060];zonula adherens assembly [GO:0045186]";"actin cytoskeleton organization [GO:0030036]	apical plasma membrane [GO:0016324];apicolateral plasma membrane [GO:0016327];filamentous actin [GO:0031941];microtubule organizing center [GO:0005815];plasma membrane [GO:0005886];spectrin [GO:0008091]";"adherens junction [GO:0005912]	cytoskeletal protein binding [GO:0008092];microtubule binding [GO:0008017];phospholipid binding [GO:0005543]";"actin binding [GO:0003779]	1	0.000594131	88.275	52.927	62.035	0.078533	1625100000	1158600000	466440000	3752	3.04973	0.0288714	1.63926	-0.489675	1.26764	-0.281616	2.29565	-0.786158	0.983039	-0.223511	6.18559	1.02598	-0.266163	0.25837	-0.0581045	1.79462	-0.562647	0.983039
0.231064	0.295168	0.408419	0.290772	0.531341	0.28823	0.0591008	-0.00170682	-0.147335	-0.312187	-0.0864318	0.0240102	-0.164294	-0.0315025	-0.217572	S	4	+	Casein kinase II substrate motif;G protein-coupled receptor kinase 1 substrate motif;GSK3 kinase substrate motif;MDC1 BRCT domain binding motif;Plk1 PBD domain binding motif	protein dephosphorylation [GO:0006470];sleep [GO:0030431]";"calcineurin-mediated signaling [GO:0097720]	cytoplasm [GO:0005737]";"calcineurin complex [GO:0005955]	calmodulin-dependent protein phosphatase activity [GO:0033192];metal ion binding [GO:0046872];protein serine/threonine phosphatase activity [GO:0004722]";"calmodulin binding [GO:0005516];phosphoprotein phosphatase activity [GO:0004721]	0.792403	3.6459e-73	231.36	224.72	158.68	-0.14934	12691000000	8840500000	3850100000	73	3.0473	0.0287943	0.0386993	0.01292	2.18442	0.507904	0.582493	0.107809	2.3912	0.44934	5.19681	1.75854	-0.43642	0.240923	0.0585644	1.8829	-0.34153	2.3912
1.39558	1.52065	1.68549	0.0428853	0.404793	-1.018	0.0611341	-0.361024	-0.428071	-0.00347935	-0.0695745	-0.064541	0.370213	-0.15634	-0.00316805	S	3	+	BARD1 BRCT domain binding motif;Casein kinase II substrate motif	protein transmembrane transport [GO:0071806]";"protein targeting to mitochondrion [GO:0006626]	mitochondrion [GO:0005739]		1	2.35254e-201	409.57	409.57	125.54	-0.41202	50104000000	36682000000	13422000000	7	3.04459	0.0286901	0.298675	-0.1161	0.223618	-0.260342	0.645822	-0.312888	2.92842	1.46367	4.09654	4.27485	-1.57977	1.77871	-1.72401	3.2792	-1.77656	2.92842
NaN	0.320993	0.494756	NaN	-0.0511002	0.0491016	NaN	0.244413	0.0564447	NaN	-0.154816	0.11451	NaN	1.18764	1.14222	S	2	+	14-3-3 domain binding motif;Calmodulin-dependent protein kinase II substrate motif;ERK1,2 kinase substrate motif;G protein-coupled receptor kinase 1 substrate motif;GSK3 kinase substrate motif;GSK-3, ERK1, ERK2, CDK5 substrate motif;PKA kinase substrate motif;PKC kinase substrate motif;WW domain binding motif	cell morphogenesis [GO:0000902];chaeta morphogenesis [GO:0008407];dendrite self-avoidance [GO:0070593];imaginal disc-derived wing hair organization [GO:0035317];imaginal disc-derived wing morphogenesis [GO:0007476];neuron projection development [GO:0031175];non-sensory hair organization [GO:0035316];oocyte morphogenesis [GO:0048601];positive regulation of protein kinase activity [GO:0045860];posi…	axon [GO:0030424];cell body [GO:0044297];cell cortex [GO:0005938];cytoplasm [GO:0005737];dendrite [GO:0030425]";"apical part of cell [GO:0045177]		1	6.98772e-30	194.68	186.97	155.39	0.22125	1045600000	684120000	361480000	1260	3.03637	0.0288811	1.88536	-1.18508	2.65393	-1.16593	2.04761	-1.0145	1.86074	-0.757055	8.44765	0.934633	-0.428028	1.25783	-0.408874	0.740038	-0.257446	1.86074
NaN	0.639727	0.672973	NaN	0.65213	0.398787	-0.28379	0.26748	0.317536	NaN	0.0343834	0.0676664	NaN	1.68342	1.75864	S	3	+	14-3-3 domain binding motif;b-Adrenergic Receptor kinase substrate motif;Calmodulin-dependent protein kinase II substrate motif;Cdc2 kinase substrate motif;CDK kinase substrate motif;CDK1,2,4,6 kinase substrate motif;CLK1 kinase substrate motif;ERK1,2 kinase substrate motif;G protein-coupled receptor kinase 1 substrate motif;GSK3 kinase substrate motif;GSK-3, ERK1, ERK2, CDK5 substrate motif;PKA …	axonogenesis [GO:0007409];dendrite morphogenesis [GO:0048813];lumen formation, open tracheal system [GO:0035149];microtubule cytoskeleton organization [GO:0000226];microtubule-based movement [GO:0007018];mitotic cell cycle [GO:0000278];mRNA transport [GO:0051028];oogenesis [GO:0048477];regulation of dendrite morphogenesis [GO:0048814]";"axo-dendritic transport [GO:0008088]	cytoplasmic dynein complex [GO:0005868];dynein complex [GO:0030286];neuron projection [GO:0043005]";"cytoplasm [GO:0005737]	microtubule motor activity [GO:0003777]";"dynein heavy chain binding [GO:0045504]	1	1.36998e-45	234.29	215.97	178.95	-0.40809	3621000000	2290900000	1330100000	377	3.02747	0.0290139	3.21764	-1.67	1.92098	-1.19557	2.12641	-1.62062	2.82738	-1.06468	10.0924	2.82202	-0.605325	0.383709	-0.130891	0.951853	-0.555941	2.82738
1.74828	0.97874	0.819686	-1.11135	-0.802566	-0.869882	2.3435	1.24752	1.01828	1.14975	0.605667	0.374763	0.950579	-0.00488222	0.169704	S	2	+	14-3-3 domain binding motif;b-Adrenergic Receptor kinase substrate motif;Calmodulin-dependent protein kinase II alpha substrate motif;Calmodulin-dependent protein kinase II substrate motif;Calmodulin-dependent protein kinase IV substrate motif;Chk1 kinase substrate motif;Phosphorylase kinase substrate motif;PKA kinase substrate motif;PKC kinase substrate motif	positive regulation of intrinsic apoptotic signaling pathway in response to DNA damage by p53 class mediator [GO:1902167];protein export from nucleus [GO:0006611];rescue of stalled ribosome [GO:0072344];ribosome-associated ubiquitin-dependent protein catabolic process [GO:1990116]";"positive regulation of intrinsic apoptotic signaling pathway in response to DNA damage [GO:1902231]	RQC complex [GO:1990112]";"nucleus [GO:0005634]	tRNA binding [GO:0000049]";"ribosomal large subunit binding [GO:0043023]	0.999861	1.26972e-24	184.66	176.74	121.39	-0.16891	4971700000	3359000000	1612700000	738	3.01216	0.0296966	0.381255	0.33826	1.86873	-1.29973	1.08749	1.16463	0.922367	0.810434	4.25985	0.571704	-0.472174	2.65803	-2.11017	0.286219	0.354198	0.922367
-0.0370104	0.0219615	-0.0129297	-0.0671989	-0.470829	-0.305871	-0.364194	-0.39898	-0.415728	-0.110553	-0.101373	-0.0961596	-0.000136114	0.286413	0.25753	S	2	+	ERK1,2 kinase substrate motif;Growth associated histone HI kinase substrate motif;GSK-3, ERK1, ERK2, CDK5 substrate motif;WW domain binding motif	imaginal disc fusion, thorax closure [GO:0046529];imaginal disc-derived wing morphogenesis [GO:0007476];mRNA catabolic process [GO:0006402];negative regulation of apoptotic process [GO:0043066];negative regulation of gene expression [GO:0010629];nuclear-transcribed mRNA catabolic process, exonucleolytic, 5'-3' [GO:0034428];nuclear-transcribed mRNA catabolic process, nonsense-mediated decay [GO:00…	P-body [GO:0000932]";"cytoplasm [GO:0005737]	RNA binding [GO:0003723]";"5'-3' exonuclease activity [GO:0008409]	1	1.09893e-217	416.34	393.68	118.96	-0.12824	35378000000	26324000000	9053900000	1519	3.00134	0.029863	1.44703	-0.283964	1.44816	-0.462569	2.46803	-0.574236	0.963033	-0.190595	6.32626	2.21457	-0.0933689	1.07977	-0.271973	4.13009	-0.383641	0.963033
0.0322275	0.750656	0.735782	0.088422	0.0426443	0.0794411	-0.312623	-0.0149607	0.0225772	-0.15589	-0.0779871	-0.248316	NaN	0.958906	1.14789	S	3	+	Casein kinase II substrate motif	DNA duplex unwinding [GO:0032508];double-strand break repair via homologous recombination [GO:0000724];double-strand break repair via synthesis-dependent strand annealing [GO:0045003];intrinsic apoptotic signaling pathway in response to DNA damage [GO:0008630];meiotic cell cycle [GO:0051321];mitotic G2 DNA damage checkpoint [GO:0007095];response to caffeine [GO:0031000];signal transduction in res…	nuclear chromosome, telomeric region [GO:0000784]";"Mre11 complex [GO:0030870]	hydrolase activity [GO:0016787]";"damaged DNA binding [GO:0003684]	0.999994	3.60855e-66	257.7	249.94	228.41	0.12211	2970500000	2021100000	949400000	546	3.001	0.0296599	2.98744	-1.21413	3.05811	-0.98323	2.30936	-1.15507	0.74527	-0.547178	9.10019	1.29145	-0.666953	0.853307	-0.436053	1.10078	-0.607891	0.74527
0.0322275	0.750656	0.735782	0.088422	0.0426443	0.0794411	-0.312623	-0.0149607	0.0225772	-0.15589	-0.0779871	-0.248316	NaN	0.958906	1.14789	S	3	+	BARD1 BRCT domain binding motif;Casein kinase II substrate motif;MAPKAPK2 kinase substrate motif;MDC1 BRCT domain binding motif;Plk1 PBD domain binding motif	DNA duplex unwinding [GO:0032508];double-strand break repair via homologous recombination [GO:0000724];double-strand break repair via synthesis-dependent strand annealing [GO:0045003];intrinsic apoptotic signaling pathway in response to DNA damage [GO:0008630];meiotic cell cycle [GO:0051321];mitotic G2 DNA damage checkpoint [GO:0007095];response to caffeine [GO:0031000];signal transduction in res…	nuclear chromosome, telomeric region [GO:0000784]";"Mre11 complex [GO:0030870]	hydrolase activity [GO:0016787]";"damaged DNA binding [GO:0003684]	1	3.60855e-66	257.7	249.94	237.71	0.30552	2970500000	2021100000	949400000	547	3.001	0.0294595	2.98744	-1.21413	3.05811	-0.98323	2.30936	-1.15507	0.74527	-0.547178	9.10019	1.29145	-0.666953	0.853307	-0.436053	1.10078	-0.607891	0.74527
-0.0305834	-0.221615	-0.179793	0.129646	0.0989575	0.0846962	0.032593	-0.0252797	-0.0886218	-0.0246125	0.03039	0.0205654	-0.193484	-0.121045	-0.208365	S	2	+	AMP-activated protein kinase substrate motif;Casein kinase I substrate motif;Casein kinase II substrate motif			helicase activity [GO:0004386];nucleic acid binding [GO:0003676]";"ATP binding [GO:0005524]	1	5.98421e-187	367.59	353.96	290.7	-0.97226	108090000000	77103000000	30988000000	192	2.99699	0.0294631	2.34301	0.183079	3.12386	0.278731	1.53644	0.147195	0.180259	0.0303011	7.18357	1.18906	0.152778	1.85538	0.24843	0.797446	0.116894	0.180259
0.0073601	-0.305747	-0.181346	0.671295	0.547647	0.223865	0.446999	0.347696	0.266369	0.0067299	-0.0100977	-0.216912	0.0295793	-0.00259369	0.062039	S	2	+	Cdc2 kinase substrate motif;CDK kinase substrate motif;CDK1,2,4,6 kinase substrate motif;ERK1,2 kinase substrate motif;Growth associated histone HI kinase substrate motif;GSK-3, ERK1, ERK2, CDK5 substrate motif;MDC1 BRCT domain binding motif;Plk1 PBD domain binding motif;WW domain binding motif	cilium-dependent cell motility [GO:0060285];microtubule nucleation [GO:0007020];sensory perception of sound [GO:0007605]";"centrosome cycle [GO:0007098]	centriole [GO:0005814]		0.985097	1.6878e-07	165.78	94.869	153.34	0.29571	3082200000	2182500000	899740000	1409	2.99322	0.0294133	0.624363	-0.103102	1.54417	0.451261	2.36852	0.324013	0.955138	-0.189586	5.4922	0.303337	0.0864844	1.78087	0.640847	2.09272	0.513599	0.955138
0.334184	0.58894	0.887815	0.56538	0.542852	0.474835	-0.213352	0.0784637	0.111724	0.302813	0.291008	-0.00552438	NaN	1.27495	0.975042	S	2	+	b-Adrenergic Receptor kinase substrate motif;G protein-coupled receptor kinase 1 substrate motif	activation of protein kinase activity [GO:0032147];MAPK cascade [GO:0000165];mucosal immune response [GO:0002385];negative regulation of canonical Wnt signaling pathway [GO:0090090];oocyte anterior/posterior axis specification [GO:0007314];oocyte axis specification [GO:0007309];p38MAPK cascade [GO:0038066];positive regulation of cell size [GO:0045793];positive regulation of multicellular organism…	cytoplasm [GO:0005737]	MAP kinase kinase activity [GO:0004708];mitogen-activated protein kinase kinase kinase binding [GO:0031435];protein kinase activity [GO:0004672];protein kinase C activity [GO:0004697];protein serine/threonine kinase activity [GO:0004674]";"ATP binding [GO:0005524]	1	1.85783e-24	194.7	182.26	177.87	0.48552	3030400000	1982400000	1048100000	200	2.99154	0.0293377	1.90775	-0.928896	1.83588	-0.597306	2.1332	-1.13272	0.94674	-0.521349	6.82358	1.01121	-0.407547	0.177754	-0.075957	1.48719	-0.611367	0.94674
-0.201711	-0.00348108	0.16402	-0.305936	-0.277149	-0.404286	-0.237967	-0.50391	NaN	-0.816372	-0.724746	-0.731313	-0.242703	-0.105085	NaN	T	2	+	G protein-coupled receptor kinase 1 substrate motif;Growth associated histone HI kinase substrate motif;GSK-3, ERK1, ERK2, CDK5 substrate motif;PKA kinase substrate motif;PKC kinase substrate motif;WW domain binding motif	centripetally migrating follicle cell migration [GO:0060269];chromosome organization [GO:0051276];dorsal appendage formation [GO:0046843];dorsal/ventral axis specification, ovarian follicular epithelium [GO:0008069];intracellular mRNA localization [GO:0008298];long-term memory [GO:0007616];maternal determination of dorsal/ventral axis, ovarian follicular epithelium, germ-line encoded [GO:0008070]…	integral component of membrane [GO:0016021];mitochondrial outer membrane [GO:0005741];mitochondrion [GO:0005739]";"Golgi apparatus [GO:0005794]	RNA binding [GO:0003723]";"protein kinase A regulatory subunit binding [GO:0034237]	1	1.27951e-100	336.02	313.45	123.65	0.97611	6349500000	5023400000	1326200000	190	2.98862	0.0291974	2.55702	-0.583583	0.927988	-0.15523	0.496555	-0.197044	0.453255	0.16017	4.43482	2.6066	-0.743753	1.31315	-0.3154	0.905125	-0.357215	0.453255
-0.12558	0.626046	0.741157	0.306022	0.626212	0.29144	0.548417	0.525426	0.422175	-0.725379	-0.555985	-0.661034	-0.636251	-0.10484	-0.140154	S	2	+	Casein kinase II substrate motif;G protein-coupled receptor kinase 1 substrate motif;GSK3 kinase substrate motif;Pyruvate dehydrogenase kinase substrate motif				1	5.01087e-126	328.19	274.99	258.94	0.38874	66623000000	51548000000	15075000000	89	2.97993	0.0293595	0.925889	-0.353718	1.58406	0.701639	1.96739	0.792421	1.03401	0.707623	5.51134	1.73469	-1.06134	0.00670464	-0.00598328	0.111919	0.0847981	1.03401
-0.155936	-0.0121117	NaN	-0.675993	-0.903549	-0.743824	-0.790268	-0.47669	-0.609574	-0.471472	-0.683205	NaN	-0.109348	-0.293037	-0.183169	S	3	+	MAPKAPK2 kinase substrate motif		integral component of membrane [GO:0016021]";"endomembrane system [GO:0012505]		0.595829	1.40704e-20	168.69	161.52	143.07	-0.086363	7672200000	6274400000	1397800000	1249	2.97799	0.0292208	1.44931	-0.382154	2.59647	-0.579271	1.82229	-0.430326	0.533777	0.111161	6.40185	1.21331	-0.493315	2.17812	-0.690432	1.60801	-0.541487	0.533777
0.226812	0.138305	0.525108	0.07104	0.0764826	0.243891	0.285114	0.118889	0.157899	-0.150213	-0.0781277	-0.0789239	0.421223	0.725184	0.825673	T	3	+	b-Adrenergic Receptor kinase substrate motif;Cdc2 kinase substrate motif;CDK1,2,4,6 kinase substrate motif;GSK-3, ERK1, ERK2, CDK5 substrate motif;MAPKAPK2 kinase substrate motif;PKA kinase substrate motif;PKC kinase substrate motif;WW domain binding motif	intracellular protein transport [GO:0006886]	mitochondrion [GO:0005739]";"mitochondrial outer membrane translocase complex [GO:0005742]	P-P-bond-hydrolysis-driven protein transmembrane transporter activity [GO:0015450]	1	2.11e-77	265.7	258.19	178.79	-1.1346	22483000000	15958000000	6525100000	26	2.97426	0.0295484	2.44556	-0.759782	1.7659	-0.526889	1.6327	-0.47006	1.00259	-0.360618	6.84675	1.54106	-0.399164	0.568373	-0.166271	0.358058	-0.109442	1.00259
0.184022	0.805674	0.80523	-0.187723	-0.32284	-0.323701	-0.0187011	-0.109092	-0.0825242	-0.292451	-0.270181	-0.0267386	-0.0604811	0.0561331	0.0122623	S	2	+	Casein kinase II substrate motif;ERK1,2 kinase substrate motif;Growth associated histone HI kinase substrate motif;GSK-3, ERK1, ERK2, CDK5 substrate motif;PKA kinase substrate motif;PKC kinase substrate motif;WW domain binding motif	negative regulation of mRNA polyadenylation [GO:1900364];regulation of mRNA stability [GO:0043488]";"negative regulation of gene expression [GO:0010629]	neuron projection [GO:0043005];nucleus [GO:0005634];plasma membrane bounded cell projection cytoplasm [GO:0032838]";"cytoplasm [GO:0005737]	poly(A) binding [GO:0008143];sequence-specific mRNA binding [GO:1990825]";"metal ion binding [GO:0046872]	1	5.89344e-15	176.85	158.28	111.66	2.931	17827000000	12977000000	4849200000	389	2.96516	0.0300769	1.01978	-0.199095	2.11446	-0.280726	0.773817	-0.0727439	1.3281	0.595671	5.23616	1.62304	-0.794765	1.84011	-0.876397	1.48284	-0.668415	1.3281
1.06335	NaN	1.50645	-0.75301	-1.10405	-0.425404	-0.909537	-0.34694	-0.61105	0.565179	0.0116388	-0.175012	0.868529	NaN	NaN	T	3	+	Cdc2 kinase substrate motif;CDK1,2,4,6 kinase substrate motif;CDK5 kinase substrate motif;Growth associated histone HI kinase substrate motif;GSK-3, ERK1, ERK2, CDK5 substrate motif;MAPKAPK2 kinase substrate motif;MDC1 BRCT domain binding motif;Plk1 PBD domain binding motif;WW domain binding motif	cleavage furrow formation [GO:0036089];cleavage furrow ingression [GO:0036090];germ cell migration [GO:0008354];membrane organization [GO:0061024];protein localization [GO:0008104]";"cellularization [GO:0007349]	cleavage furrow [GO:0032154]";"cellularization cleavage furrow invagination front [GO:0110071]		0.800256	4.00241e-11	142.93	126.62	128.38	2.5841	2430100000	1713300000	716780000	754	2.96277	0.0299745	-4.34294e-08	0	-4.34294e-08	0	-4.34294e-08	0	-4.34294e-08	0	0	1.3963	-1.15096	2.18173	-2.04572	2.24818	-1.90741	0
0.120826	-0.155962	0.0110167	0.58981	0.745545	0.582007	0.469534	0.299541	0.0945642	0.248577	0.288248	0.191792	0.0566385	0.189259	-0.116777	S	2	+	AMP-activated protein kinase substrate motif;Casein kinase II substrate motif;HMGCoA Reductase kinase substrate motif	potassium ion transmembrane transport [GO:0071805];regulation of heart rate [GO:0002027]";"locomotor rhythm [GO:0045475]	integral component of plasma membrane [GO:0005887];plasma membrane [GO:0005886];potassium channel complex [GO:0034705]";"integral component of membrane [GO:0016021];integral component of membrane [GO:0016021]	protein homodimerization activity [GO:0042803]";"potassium ion leak channel activity [GO:0022841];potassium channel activity [GO:0005267]	0.999998	1.51183e-107	322.22	300.02	278.21	-0.36162	30637000000	21035000000	9601700000	373	2.96037	0.0298861	1.00912	0.199832	2.34773	0.596081	0.808999	0.24484	0.160194	-0.0510796	4.32604	1.37494	0.250912	2.58962	0.64716	1.02924	0.295919	0.160194
-0.423772	-0.842163	-0.400291	0.0543554	0.320512	0.242114	-0.329692	-0.461397	-0.475792	-0.345501	-0.00535662	-0.130849	-0.294438	-0.359231	-0.345052	S	2	+	Cdc2 kinase substrate motif;CDK kinase substrate motif;CDK1,2,4,6 kinase substrate motif;ERK1,2 kinase substrate motif;GSK-3, ERK1, ERK2, CDK5 substrate motif;WW domain binding motif	sphingolipid biosynthetic process [GO:0030148];very long-chain fatty acid biosynthetic process [GO:0042761]";"fatty acid elongation [GO:0030497]	endoplasmic reticulum membrane [GO:0005789];integral component of membrane [GO:0016021]";"endoplasmic reticulum [GO:0005783]	3-hydroxy-arachidoyl-CoA dehydratase activity [GO:0102343];3-hydroxy-behenoyl-CoA dehydratase activity [GO:0102344];3-hydroxy-lignoceroyl-CoA dehydratase activity [GO:0102345];enzyme binding [GO:0019899];very-long-chain 3-hydroxyacyl-CoA dehydratase activity [GO:0102158]";"3-hydroxyacyl-CoA dehydratase activity [GO:0018812]	0.999996	3.44868e-42	190.34	125.5	151.03	0.57739	75424000000	60782000000	14641000000	239	2.95672	0.0298616	0.785394	0.172338	2.56818	0.538567	0.820214	-0.0893865	0.700292	-0.222502	4.87408	1.0631	0.39484	2.01354	0.761069	0.369105	0.133115	0.700292
-0.140832	0.303924	0.13255	0.706733	0.697843	0.920819	0.12009	-0.142861	-0.0113355	-0.051813	0.0457299	-0.202078	-0.344908	0.0498678	0.173281	S	3	+	Casein kinase I substrate motif;Casein kinase II substrate motif;G protein-coupled receptor kinase 1 substrate motif;Pyruvate dehydrogenase kinase substrate motif				0.999067	2.90359e-119	300.79	293.69	222.98	1.9524	15151000000	11832000000	3319200000	69	2.95067	0.0299375	0.0578866	-0.0288007	2.04092	0.815718	0.0581864	0.0292176	0.275158	0.139134	2.43215	0.494165	-0.167934	1.98311	0.676584	0.297023	-0.109916	0.275158
0.198714	0.465139	0.50776	0.0611292	0.123052	-0.0766845	-0.19268	-0.262643	-0.268755	0.0259119	0.0748108	-0.225268	-0.107787	-0.0399225	-0.272397	S	2	+	b-Adrenergic Receptor kinase substrate motif;Casein kinase II substrate motif	microtubule cytoskeleton organization [GO:0000226];microtubule-based process [GO:0007017];mitotic cell cycle [GO:0000278];mitotic cytokinesis [GO:0000281]";mitotic spindle assembly checkpoint [GO:0007094]";"antimicrobial humoral response [GO:0019730];"microtubule-based process [GO:0007017]	centrosome [GO:0005813];cytoplasm [GO:0005737];microtubule [GO:0005874];nucleus [GO:0005634];perinuclear region of cytoplasm [GO:0048471];perinuclear region of cytoplasm [GO:0048471]";spindle [GO:0005819]";"astral microtubule [GO:0000235];"cytoplasm [GO:0005737]	GTP binding [GO:0005525];myosin binding [GO:0017022];structural constituent of cytoskeleton [GO:0005200]";"GTPase activity [GO:0003924]	1	2.0558e-95	297.99	289.96	244.68	0.08006	37066000000	26794000000	10273000000	48	2.93662	0.0303106	0.353853	0.0985205	0.903485	0.175868	0.622424	-0.101324	1.95433	0.530574	3.83409	1.49153	-0.432053	1.45402	-0.354706	2.49802	-0.631898	1.95433
-0.0671349	-0.233277	-0.207541	0.265195	0.113722	0.117504	-0.0936032	-0.15964	-0.177856	-0.032226	-0.0281394	0.0134128	-0.0571674	0.0884678	0.116067	S	2	+	ERK1,2 kinase substrate motif;GSK-3, ERK1, ERK2, CDK5 substrate motif;WW domain binding motif	Cajal body organization [GO:0030576]	chromosome, centromeric region [GO:0000775];cytoplasm [GO:0005737];histone locus body [GO:0035363];nuclear body [GO:0016604];nucleoplasm [GO:0005654];spindle [GO:0005819]";"Cajal body [GO:0015030]		0.999833	1.95605e-20	183.58	169.15	158.91	-0.70238	18626000000	13874000000	4752500000	238	2.9207	0.0309136	0.50951	-0.0647733	0.726529	0.116351	1.49909	-0.192822	1.36896	-0.21844	4.10408	1.33982	0.153667	2.01948	0.334791	0.167728	0.0256178	1.36896
0.277163	-0.375471	-0.150994	0.260348	-0.14596	-0.0353077	1.46965	1.51235	1.26805	0.375314	0.235556	-0.651707	0.413829	-0.0961751	-0.0551434	T	3	+	ERK1,2 kinase substrate motif;G protein-coupled receptor kinase 1 substrate motif;GSK3, Erk1, Erk2 and CDK5 kinase motif;GSK-3, ERK1, ERK2, CDK5 substrate motif;PKA kinase substrate motif;PKC kinase substrate motif;WW domain binding motif	chromosome condensation [GO:0030261];female germ-line stem cell population maintenance [GO:0036099];female meiotic nuclear division [GO:0007143];flight [GO:0060361];histone phosphorylation [GO:0016572];male germ-line stem cell population maintenance [GO:0036098];meiotic cell cycle [GO:0051321];mitotic sister chromatid segregation [GO:0000070];mitotic spindle organization [GO:0007052];neuronal ste…	M band [GO:0031430];nucleolus [GO:0005730];nucleus [GO:0005634];sarcomere [GO:0030017];Z disc [GO:0030018]";"chromatin [GO:0000785]	histone threonine kinase activity [GO:0035184];metal ion binding [GO:0046872];protein kinase activity [GO:0004672];protein kinase activity [GO:0004672]";protein kinase binding [GO:0019901]";"ATP binding [GO:0005524]	0.998452	9.26139e-05	113.56	91.009	106.3	0.38381	4719300000	3252700000	1466600000	467	2.91884	0.0307975	0.100627	-0.101116	0.108493	-0.0611435	2.74547	1.32918	0.271446	-0.170604	3.22604	0.0646254	0.0694886	0.184206	0.109461	2.72545	1.49979	0.271446
0.590397	0.843582	0.596458	0.309817	0.31709	0.28889	-0.0330463	0.0968527	0.181531	-0.338597	0.0393345	0.0769406	NaN	0.431038	NaN	S	2	+	PKA kinase substrate motif;PKC kinase substrate motif	rhabdomere development [GO:0042052]";"regulated exocytosis [GO:0045055]	intracellular membrane-bounded organelle [GO:0043231]	Rab GTPase binding [GO:0017137]	0.99898	4.29732e-10	166.64	129.46	148.57	-2.5784	591700000	404870000	186830000	411	2.91077	0.0311341	-4.34294e-08	0	-4.34294e-08	0	-4.34294e-08	0	-4.34294e-08	0	0	2.06033	-0.75092	1.94297	-0.371547	2.33306	-0.595033	0
0.498297	0.4337	0.473992	0.0829473	-0.122413	0.147	0.136552	0.178861	0.179202	-0.142676	-0.039019	0.166619	0.144334	0.0618002	0.155127	S	2	+	ATM kinase substrate motif;Casein kinase I substrate motif;Casein kinase II substrate motif;DNA dependent Protein kinase substrate motif;G protein-coupled receptor kinase 1 substrate motif;MDC1 BRCT domain binding motif;Plk1 PBD domain binding motif	axon guidance [GO:0007411];blastoderm segmentation [GO:0007350];determination of adult lifespan [GO:0008340];imaginal disc-derived wing morphogenesis [GO:0007476];locomotion [GO:0040011];negative regulation of transcription by RNA polymerase II [GO:0000122];negative regulation of transcription, DNA-templated [GO:0045892];neuron remodeling [GO:0016322];positive regulation of border follicle cell m…	nucleus [GO:0005634]";"nucleoplasm [GO:0005654]	DNA-dependent ATPase activity [GO:0008094]";"ATP binding [GO:0005524]	0.998583	7.43523e-43	211.17	193.31	201.51	1.9509	3994400000	2709500000	1284900000	1601	2.91007	0.0310061	0.585904	-0.125446	0.416501	-0.0845757	0.60974	0.0444514	3.24275	0.348243	4.85489	2.15697	-0.473688	2.18265	-0.432818	3.68026	-0.303791	3.24275
NaN	-0.0129953	-0.061812	NaN	0.580391	0.684718	NaN	-0.402783	-0.342684	NaN	-0.186131	-0.393648	NaN	0.10044	0.340128	S	2	+	b-Adrenergic Receptor kinase substrate motif;Casein kinase II substrate motif;G protein-coupled receptor kinase 1 substrate motif;GSK3 kinase substrate motif;PKA kinase substrate motif	cuticle development [GO:0042335];dorsal closure [GO:0007391];ecdysone biosynthetic process [GO:0006697];embryonic development via the syncytial blastoderm [GO:0001700];embryonic digestive tract development [GO:0048566];head involution [GO:0008258];midgut development [GO:0007494];oogenesis [GO:0048477]";"central nervous system development [GO:0007417]	endoplasmic reticulum membrane [GO:0005789];organelle membrane [GO:0031090]";"endoplasmic reticulum [GO:0005783];integral component of membrane [GO:0016021]	iron ion binding [GO:0005506];monooxygenase activity [GO:0004497];oxidoreductase activity [GO:0016491];oxidoreductase activity, acting on paired donors, with incorporation or reduction of molecular oxygen [GO:0016705]";"heme binding [GO:0020037]	0.999985	1.12473e-12	178.68	166.81	178.68	-0.81915	544750000	346940000	197810000	457	2.90939	0.0308675	1.0732	-0.510173	1.0579	0.412271	1.38963	-0.593017	0.770322	-0.257688	4.29105	0.849596	-0.252485	2.13616	0.669958	1.88379	-0.33533	0.770322
NaN	-0.0746297	-0.0870783	NaN	-0.293248	-0.204613	NaN	-0.358663	-0.235968	NaN	-0.289952	-0.353262	NaN	0.143358	0.19127	S	2	+	14-3-3 domain binding motif;Calmodulin-dependent protein kinase II substrate motif;Calmodulin-dependent protein kinase IV substrate motif;Casein kinase II substrate motif;Chk1 kinase substrate motif;ERK1,2 kinase substrate motif;GSK-3, ERK1, ERK2, CDK5 substrate motif;PKA kinase substrate motif;PKC kinase substrate motif;WW domain binding motif				0.999996	5.41955e-29	236.26	170.31	161.25	-0.19965	5765500000	4093100000	1672400000	229	2.90326	0.0311018	2.18521	-0.488921	1.84363	-0.416245	1.70983	-0.464629	2.0087	-0.248168	7.74737	1.75729	-0.240753	1.19281	-0.168077	1.14001	-0.216461	2.0087
-0.258855	-0.818949	-0.808092	-0.118491	-0.278813	-0.26299	-0.795943	-0.589282	-0.358592	0.662811	0.248626	0.50865	-0.0381148	-0.544351	-0.476605	S	3	+	b-Adrenergic Receptor kinase substrate motif;Casein kinase I substrate motif;Casein kinase II substrate motif;G protein-coupled receptor kinase 1 substrate motif	translational initiation [GO:0006413]";"formation of cytoplasmic translation initiation complex [GO:0001732];formation of cytoplasmic translation initiation complex [GO:0001732]	eukaryotic 43S preinitiation complex [GO:0016282];eukaryotic 48S preinitiation complex [GO:0033290];eukaryotic translation initiation factor 3 complex [GO:0005852]";"cytosol [GO:0005829];"eukaryotic 43S preinitiation complex [GO:0016282]	translation initiation factor binding [GO:0031369]";"translation initiation factor activity [GO:0003743]	1	3.5929e-215	388.65	384.9	156.7	-0.85723	127690000000	104140000000	23545000000	165	2.89906	0.0310595	1.8435	0.826386	0.328103	0.132926	0.490321	-0.228249	0.4932	-0.275608	3.15512	2.12195	1.10199	0.998983	0.408534	0.0742502	0.0473594	0.4932
-0.109733	-0.0155078	-0.0590142	0.0642239	0.138517	0.0810503	0.488815	0.404522	0.296602	0.309287	0.275754	0.260383	0.14445	-0.249558	-0.283094	T	4	+	b-Adrenergic Receptor kinase substrate motif;Casein kinase I substrate motif;Casein kinase II substrate motif;PKA kinase substrate motif	mRNA splicing, via spliceosome [GO:0000398];pole cell development [GO:0007277];pole plasm mRNA localization [GO:0019094];pole plasm oskar mRNA localization [GO:0045451]";"anterior/posterior pattern specification [GO:0009952]	cytoplasm [GO:0005737];cytosol [GO:0005829];precatalytic spliceosome [GO:0071011];ribonucleoprotein complex [GO:1990904]";"catalytic step 2 spliceosome [GO:0071013]		1	1.92896e-244	428.5	418.75	180.23	-0.27387	593630000000	423740000000	169890000000	285	2.89411	0.0311243	1.38967	0.411209	0.738486	0.223998	1.62412	0.526047	0.185403	0.0679823	3.93768	3.43192	0.343226	1.93816	0.156015	2.74904	0.458065	0.185403
NaN	-0.683784	-0.781733	NaN	-0.0634092	0.409418	NaN	0.0230872	0.195298	NaN	0.748538	0.695045	NaN	-0.899803	-1.2378	S	2	+	b-Adrenergic Receptor kinase substrate motif;G protein-coupled receptor kinase 1 substrate motif;PKA kinase substrate motif;PKC kinase substrate motif	axo-dendritic transport [GO:0008088];cellular response to starvation [GO:0009267];establishment of Golgi localization [GO:0051683];intracellular distribution of mitochondria [GO:0048312];locomotion [GO:0040011];lysosome localization [GO:0032418];negative regulation of dendrite morphogenesis [GO:0050774];negative regulation of neuron death [GO:1901215];neuromuscular junction development [GO:000752…	cytoplasm [GO:0005737];cytosol [GO:0005829];dendritic branch point [GO:1990033];dendritic shaft [GO:0043198];Golgi stack [GO:0005795];late endosome membrane [GO:0031902];lysosomal membrane [GO:0005765];lysosomal membrane [GO:0005765]";neuromuscular junction [GO:0031594];plasmodesma [GO:0009506];subsynaptic reticulum [GO:0071212];terminal bouton [GO:0043195]";type I terminal bouton [GO:0061174]";"…	protein kinase activity [GO:0004672];protein serine/threonine kinase activity [GO:0004674];Rab GTPase binding [GO:0017137]";"ATP binding [GO:0005524]	1	2.30414e-05	143.64	98.278	143.64	-0.20425	358160000	237690000	120470000	1752	2.8863	0.0312824	2.04538	1.79059	1.2955	1.24181	1.60278	1.178	0.706983	0.336044	5.65064	2.83312	1.45455	1.19195	0.905763	1.86769	0.841951	0.706983
-0.26959	-0.314704	-0.499196	0.173109	0.0783629	0.00856813	0.204428	0.17064	0.135868	-0.231968	-0.0290825	0.0234053	-0.0548067	0.196707	-0.0348482	S	2	+	Casein kinase I substrate motif;Casein kinase II substrate motif;MDC1 BRCT domain binding motif;Plk1 PBD domain binding motif	chemical synaptic transmission [GO:0007268];courtship behavior [GO:0007619];learning or memory [GO:0007611];long-term memory [GO:0007616];male courtship behavior [GO:0008049];negative regulation of cytokine secretion [GO:0050710];negative regulation of lipid storage [GO:0010888];neuromuscular junction development [GO:0007528];peptidyl-threonine autophosphorylation [GO:1990443];protein phosphoryla…	calcium- and calmodulin-dependent protein kinase complex [GO:0005954];cytoplasm [GO:0005737];dendrite [GO:0030425];neuron projection [GO:0043005];postsynaptic membrane [GO:0045211];presynaptic active zone [GO:0048786]";"axon [GO:0030424]	calmodulin binding [GO:0005516];calmodulin-dependent protein kinase activity [GO:0004683];calmodulin-dependent protein kinase activity [GO:0004683]";protein serine/threonine kinase activity [GO:0004674]";"ATP binding [GO:0005524]	0.970331	2.49913e-43	210.26	199.61	149.95	-0.59404	12502000000	10016000000	2485500000	337	2.88431	0.0312281	0.439477	-0.114899	0.210866	0.0509957	0.743361	0.134628	1.68461	-0.396848	3.07832	1.2618	0.281948	2.20841	0.447843	2.72391	0.531476	1.68461
-0.0517791	-0.0977655	-0.0849373	0.170009	0.388618	0.481611	0.0668051	0.0919649	0.0681001	0.00943815	0.142389	0.0411823	-0.0562466	0.0861429	-0.0324699	S	2	+	14-3-3 domain binding motif;b-Adrenergic Receptor kinase substrate motif;Calmodulin-dependent protein kinase II substrate motif;Casein kinase II substrate motif;G protein-coupled receptor kinase 1 substrate motif;PAK2 kinase substrate motif;PKA kinase substrate motif;PKC epsilon kinase substrate motif;PKC kinase substrate motif	regulation of transcription by RNA polymerase II [GO:0006357]	nucleus [GO:0005634]	RNA polymerase II proximal promoter sequence-specific DNA binding [GO:0000978]";"DNA-binding transcription factor activity, RNA polymerase II-specific [GO:0000981]	0.999999	2.54181e-05	106.31	102.09	84.166	0.66594	3029900000	2173600000	856280000	125	2.86762	0.0318953	0.474796	0.0651943	1.56311	0.347604	0.788027	0.0764812	0.772047	-0.0773028	3.59798	1.54959	0.142497	1.98255	0.424907	3.18828	0.153784	0.772047
0.216421	-0.0540676	0.139876	0.247228	0.346647	0.256793	-0.397641	-0.407095	-0.498676	0.0794793	0.119444	0.151638	0.123919	0.724268	0.185925	S	2	+	Casein kinase II substrate motif	positive regulation of innate immune response [GO:0045089]";"defense response to Gram-negative bacterium [GO:0050829]	integral component of membrane [GO:0016021]		0.862765	5.95496e-87	247.64	243.09	170.09	0.056663	11599000000	8824500000	2774500000	359	2.86651	0.0317688	0.522175	-0.22785	0.114925	-0.0611479	1.80329	-0.779175	0.517495	-0.243961	2.95789	0.0676156	0.0161108	0.990982	0.182813	2.45617	-0.535214	0.517495
0.342153	0.87523	1.9105	-0.408408	-0.489	-0.564379	-0.875378	-0.796574	-0.958023	-1.05703	-0.590044	-0.695618	-0.584913	0.197364	0.0660474	S	3	+	b-Adrenergic Receptor kinase substrate motif;Casein kinase I substrate motif		heterochromatin [GO:0000792];nucleosome [GO:0000786];nucleus [GO:0005634];polytene chromosome [GO:0005700]";"cytoplasm [GO:0005737]	satellite DNA binding [GO:0003696]";"AT DNA binding [GO:0003680];DNA binding [GO:0003677]	1	4.99734e-233	447.93	436.01	206.94	-0.047799	40667000000	34267000000	6400000000	299	2.841	0.0331954	1.13095	-0.67373	0.705009	-0.380096	1.45114	-0.769491	1.03838	1.1498	4.32548	1.71369	-1.82353	1.52672	-1.52989	1.84496	-1.91929	1.03838
-0.0642732	-0.0601173	-0.229242	0.333698	0.466838	0.395984	-0.118123	-0.0433911	-0.300688	-0.357828	-0.0365058	-0.0589872	-0.379116	-0.115989	-0.0780073	S	2	+	Casein kinase II substrate motif;Cdc2 kinase substrate motif;CDK kinase substrate motif;CDK1,2,4,6 kinase substrate motif;ERK1,2 kinase substrate motif;GSK-3, ERK1, ERK2, CDK5 substrate motif;WW domain binding motif	cell proliferation [GO:0008283]	nucleolus [GO:0005730];nucleus [GO:0005634];protein-containing complex [GO:0032991]";"cytoplasm [GO:0005737]	mRNA binding [GO:0003729];sequence-specific DNA binding [GO:0043565]";"DNA binding [GO:0003677];RNA binding [GO:0003723]	0.996767	1.30949e-56	269.99	237.98	269.99	0.096864	282620000000	217360000000	65264000000	42	2.83626	0.0333143	0.102319	0.0399303	2.34952	0.589877	0.109921	0.0369698	0.266135	0.0731598	2.82789	0.101542	-0.0332294	2.80102	0.516717	0.141825	-0.03619	0.266135
-0.140331	0.281547	0.144186	0.42904	0.279886	0.189104	-0.175356	0.37876	0.318686	-0.861474	-0.474849	-0.667497	-0.9192	-0.492082	-0.28333	S	2	+	b-Adrenergic Receptor kinase substrate motif;Casein kinase II substrate motif;G protein-coupled receptor kinase 1 substrate motif;MAPKAPK2 kinase substrate motif;Pyruvate dehydrogenase kinase substrate motif				1	3.94759e-81	294.63	291.39	132.31	-0.55513	46493000000	36488000000	10005000000	93	2.83143	0.0334659	0.1799	-0.103069	1.90694	0.864214	1.34654	0.738901	1.37204	0.660005	4.80542	1.98857	-0.763074	0.64722	0.204209	0.135304	0.078896	1.37204
-0.063457	-0.0157313	0.112207	-0.156926	-0.179439	-0.264523	0.0975837	0.176199	0.0413829	-0.182734	-0.083112	-0.0591321	-0.17056	-0.101626	-0.111862	S	2	+	Casein kinase II substrate motif;ERK1,2 kinase substrate motif;G protein-coupled receptor kinase 1 substrate motif;GSK-3, ERK1, ERK2, CDK5 substrate motif;MAPKAPK2 kinase substrate motif;WW domain binding motif		polytene chromosome interband [GO:0005705]	NADP binding [GO:0050661];oxidoreductase activity [GO:0016491]";phosphogluconate dehydrogenase (decarboxylating) activity [GO:0004616]";"NAD binding [GO:0051287]	1	2.76628e-47	248.36	248.36	248.36	-0.33748	32251000000	23227000000	9023500000	228	2.82106	0.0337288	0.171112	0.0196898	0.857647	-0.0722799	2.19344	0.233071	1.15365	0.139022	4.37585	0.857757	-0.119332	1.57104	-0.211302	0.65	0.0940489	1.15365
-0.134781	-0.467708	-0.302506	0.180638	0.133805	0.17855	0.00737364	-0.167695	-0.161961	0.0040729	0.0507125	0.0131486	0.0199341	-0.119387	-0.0454553	S	2	+	Cdc2 kinase substrate motif;CDK kinase substrate motif;CDK1,2,4,6 kinase substrate motif;ERK1,2 kinase substrate motif;GSK-3, ERK1, ERK2, CDK5 substrate motif;WW domain binding motif	Cajal body organization [GO:0030576]	chromosome, centromeric region [GO:0000775];cytoplasm [GO:0005737];histone locus body [GO:0035363];nuclear body [GO:0016604];nucleoplasm [GO:0005654];spindle [GO:0005819]";"Cajal body [GO:0015030]		1	1.54671e-06	140.96	100.61	103.67	1.0638	18171000000	13082000000	5089000000	467	2.81067	0.0340787	0.764598	0.0709474	2.10691	0.212634	0.350078	-0.0591248	1.14355	-0.253362	4.36513	1.53917	0.32431	2.05944	0.465996	0.801971	0.194238	1.14355
-1.18463	-1.81986	-0.955319	-0.0451729	-0.947528	-0.76657	-1.50378	-2.09392	-1.69432	-1.14999	-0.884461	-0.745829	-0.0176893	-0.00599712	-0.352381	S	2	+	ERK1,2 kinase substrate motif;GSK-3, ERK1, ERK2, CDK5 substrate motif;MDC1 BRCT domain binding motif;Plk1 PBD domain binding motif;WW domain binding motif	regulation of transcription by RNA polymerase II [GO:0006357]";"regulation of transcription, DNA-templated [GO:0006355]	protein-containing complex [GO:0032991]";"nucleus [GO:0005634]	nucleic acid binding [GO:0003676]	0.997951	8.23994e-25	208.72	172.27	93.851	-0.35091	8442300000	7441200000	1001100000	168	2.80825	0.0339777	2.08865	-0.801403	0.705882	-0.461068	2.85532	-1.63865	1.87381	-1.19458	7.52366	0.621434	0.393179	0.905697	0.733514	0.643482	-0.444069	1.87381
-0.0624755	-0.0944973	-0.0663649	0.428629	0.240807	0.330032	0.357637	0.171131	0.0752103	0.123671	0.0680883	0.00676766	0.0650485	-0.141405	-0.0732972	S	2	+	14-3-3 domain binding motif;Calmodulin-dependent protein kinase II alpha substrate motif;Calmodulin-dependent protein kinase II substrate motif;Calmodulin-dependent protein kinase IV substrate motif;Chk1 kinase substrate motif;Phosphorylase kinase substrate motif;PKA kinase substrate motif;PKC kinase substrate motif	negative regulation of transposition, DNA-mediated [GO:0000335];regulation of alternative mRNA splicing, via spliceosome [GO:0000381];RNA splicing [GO:0008380]";"mRNA splicing, via spliceosome [GO:0000398]	cytoplasm [GO:0005737];nucleoplasm [GO:0005654]";"ASAP complex [GO:0061574]	mRNA binding [GO:0003729]	1	3.34478e-23	184.04	149.27	122.29	0.97296	24188000000	17184000000	7004400000	6	2.804	0.0341444	0.769034	0.11606	2.03235	0.383041	1.1494	0.251211	0.148539	-0.0245612	4.09933	1.78907	0.140622	2.74718	0.407602	1.52449	0.275772	0.148539
-0.157911	-0.208236	-0.0369568	-0.02543	0.0502062	0.00302572	0.209036	0.292991	0.117584	-0.0627196	0.140469	0.0453418	-0.117902	-0.0893975	-0.105327	S	3	+	14-3-3 domain binding motif;Akt kinase substrate motif;Calmodulin-dependent protein kinase II substrate motif;Casein kinase II substrate motif;MAPKAPK1 kinase substrate motif;PAK2 kinase substrate motif;Pim1 kinase substrate sequence;PKA kinase substrate motif;PKC epsilon kinase substrate motif;PKC kinase substrate motif	eggshell chorion gene amplification [GO:0007307];G1/S transition of mitotic cell cycle [GO:0000082];mitotic cell cycle [GO:0000278];negative regulation of ubiquitin protein ligase activity [GO:1904667];neuroblast fate determination [GO:0007400];neuron fate specification [GO:0048665];peripheral nervous system development [GO:0007422];pole cell development [GO:0007277];positive regulation of apopto…	cyclin-dependent protein kinase holoenzyme complex [GO:0000307];cytoplasm [GO:0005737];nucleus [GO:0005634]";"centrosome [GO:0005813];nucleus [GO:0005634]	protein kinase binding [GO:0019901]";"cyclin-dependent protein serine/threonine kinase regulator activity [GO:0016538];transferase activity [GO:0016740]	0.998697	1.52093e-53	252.18	239.73	120.64	0.046336	12759000000	9371600000	3387000000	114	2.79787	0.0343315	1.15233	0.145239	2.06909	0.113476	2.4255	0.310746	0.229504	-0.0301594	5.87642	1.06162	0.175399	1.21804	0.143636	2.04746	0.340905	0.229504
-0.849076	-0.637174	-0.922647	-0.216066	0.110135	-0.177687	0.186392	0.126138	0.378853	0.270706	0.311666	0.641195	0.652754	0.197236	-0.301764	T	3	+	AMP-activated protein kinase substrate motif;b-Adrenergic Receptor kinase substrate motif;Calmodulin-dependent protein kinase I substrate motif;Calmodulin-dependent protein kinase II alpha substrate motif;Calmodulin-dependent protein kinase II substrate motif;Calmodulin-dependent protein kinase IV substrate motif;Chk1 kinase substrate motif;PKC kinase substrate motif	chemical synaptic transmission [GO:0007268];courtship behavior [GO:0007619];learning or memory [GO:0007611];long-term memory [GO:0007616];male courtship behavior [GO:0008049];negative regulation of cytokine secretion [GO:0050710];negative regulation of lipid storage [GO:0010888];neuromuscular junction development [GO:0007528];peptidyl-threonine autophosphorylation [GO:1990443];protein phosphoryla…	calcium- and calmodulin-dependent protein kinase complex [GO:0005954];cytoplasm [GO:0005737];dendrite [GO:0030425];neuron projection [GO:0043005];postsynaptic membrane [GO:0045211];presynaptic active zone [GO:0048786]";"axon [GO:0030424]	calmodulin binding [GO:0005516];calmodulin-dependent protein kinase activity [GO:0004683];calmodulin-dependent protein kinase activity [GO:0004683]";protein serine/threonine kinase activity [GO:0004674]";"ATP binding [GO:0005524]	1	4.05257e-10	137.85	121.86	97.69	-1.0594	1747300000	1231500000	515730000	287	2.79171	0.0344286	0.306145	0.225114	0.398641	-0.277281	0.0577063	0.0477189	1.5703	-0.985708	2.33279	2.94717	1.21082	2.21332	0.708427	3.0772	1.03343	1.5703
0.0912335	0.549033	0.558967	-0.000966952	0.778716	0.222605	0.0701969	0.170603	0.163558	-0.302813	-0.0780246	-0.0443474	NaN	1.25994	1.23672	S	2	+	DNA dependent Protein kinase substrate motif;ERK1,2 kinase substrate motif;GSK-3, ERK1, ERK2, CDK5 substrate motif;WW domain binding motif	temperature compensation of the circadian clock [GO:0010378]";"entrainment of circadian clock [GO:0009649]			1	4.44091e-25	212.03	201.96	212.03	0.37185	9563200000	6235800000	3327400000	2096	2.77944	0.0348962	3.02979	-1.39006	1.25831	-0.914877	3.90881	-1.11354	1.62387	-0.848584	9.82077	1.44371	-0.541473	0.084327	-0.0662929	0.774436	-0.264958	1.62387
0.281734	0.390323	0.452959	0.0200491	0.0325422	0.0284091	0.0570116	0.106884	0.118801	0.0512059	0.0889091	0.0652584	-0.00301301	0.242798	0.236527	S	3	+	Cdc2 kinase substrate motif;CDK kinase substrate motif;CDK1,2,4,6 kinase substrate motif;ERK1,2 kinase substrate motif;GSK-3, ERK1, ERK2, CDK5 substrate motif;WW domain binding motif	DNA replication initiation [GO:0006270];mitotic cell cycle [GO:0000278];mitotic DNA replication checkpoint [GO:0033314]";"cell division [GO:0051301]	nucleus [GO:0005634]	DNA replication origin binding [GO:0003688]	1	7.82284e-128	326.78	316.43	232.19	0.74475	50556000000	35630000000	14925000000	142	2.7766	0.034837	0.480483	-0.0903129	0.74693	-0.131771	0.318108	-0.0645384	1.06841	0.216235	2.61393	2.40708	-0.306548	2.64487	-0.348005	2.2009	-0.280773	1.06841
-1.13635	-0.515569	-0.556393	NaN	0.29678	0.120485	-1.06676	-0.965515	-0.790907	-0.325561	-0.252167	-0.131062	-1.14915	NaN	-0.784408	S	2	+	Casein kinase II substrate motif;PKA kinase substrate motif;PKC kinase substrate motif	mitotic cell cycle [GO:0000278];protein folding [GO:0006457]";"centriole replication [GO:0007099]	chaperonin-containing T-complex [GO:0005832]	unfolded protein binding [GO:0051082]";"ATP binding [GO:0005524]	0.944213	2.94813e-06	151.07	114.11	138.01	-0.19787	513280000	399900000	113380000	155	2.77582	0.0346595	1.74731	0.730517	1.54612	1.17541	0.0505671	0.0257197	0.311873	0.230676	3.65588	1.12831	0.499841	1.4155	0.944737	0.401735	-0.204957	0.311873
NaN	-0.0230224	-0.0187619	NaN	-0.293248	-0.317228	NaN	-0.426223	-0.235968	NaN	-0.350966	-0.361907	NaN	0.113823	0.163046	S	2	+	Casein kinase II substrate motif;G protein-coupled receptor kinase 1 substrate motif;GSK3 kinase substrate motif;PKA kinase substrate motif;PKC kinase substrate motif				1	3.75537e-15	180.9	165.7	174.21	-0.68764	5810500000	4138800000	1671700000	227	2.7743	0.0346022	2.58746	-0.494871	2.42184	-0.443672	1.38602	-0.46953	1.63439	-0.159326	8.02971	3.51435	-0.335544	2.73777	-0.284346	1.08303	-0.310203	1.63439
0.0265017	-0.268194	-0.0970666	0.381653	0.411522	0.221811	0.185026	-0.0227127	-0.100726	0.0943826	0.0555301	0.104336	-0.34257	-0.142619	-0.150879	S	2	+	Casein kinase II substrate motif	protein import into nucleus [GO:0006606]";"nuclear pore organization [GO:0006999];nuclear pore organization [GO:0006999]	nuclear pore inner ring [GO:0044611]	structural constituent of nuclear pore [GO:0017056]	0.994765	1.35447e-76	276.47	251.65	225.8	-0.21865	24175000000	17681000000	6494100000	1233	2.76542	0.0348877	1.94223	0.296772	2.47806	0.550351	1.01614	0.232552	0.388337	0.0991032	5.82476	1.07129	0.197669	1.91466	0.451248	0.480222	0.133449	0.388337
0.166511	0.295957	0.319797	-0.0393149	-0.248871	-0.354117	0.0523022	-0.185755	-0.258831	-0.473494	-0.430695	-0.254319	-0.0633836	0.255742	0.280879	S	2	+	BARD1 BRCT domain binding motif;Casein kinase I substrate motif;Casein kinase II substrate motif;G protein-coupled receptor kinase 1 substrate motif;PKA kinase substrate motif	histone H3-K9 methylation [GO:0051567];regulation of chromatin silencing [GO:0031935]";"heterochromatin organization [GO:0070828]	nucleus [GO:0005634];polytene chromosome [GO:0005700];polytene chromosome chromocenter [GO:0005701];polytene chromosome puff [GO:0005703]";"cytoplasm [GO:0005737]		1	0	516.4	503.59	319.2	-0.28623	371400000000	293230000000	78169000000	264	2.7612	0.0349468	1.8632	-0.543915	1.21049	-0.371847	0.928234	-0.288507	0.355391	0.103009	4.35732	2.84994	-0.646924	1.98662	-0.474856	1.68789	-0.391516	0.355391
0.0922818	0.109543	0.380272	0.997401	-0.145101	0.0447909	-0.207273	-0.47456	-0.396216	-0.274351	-0.00866064	-0.0143478	NaN	1.35541	1.53054	S	2	+	b-Adrenergic Receptor kinase substrate motif;Casein kinase I substrate motif;Casein kinase II substrate motif;G protein-coupled receptor kinase 1 substrate motif;Pyruvate dehydrogenase kinase substrate motif	imaginal disc fusion, thorax closure [GO:0046529];imaginal disc-derived wing morphogenesis [GO:0007476];mRNA catabolic process [GO:0006402];negative regulation of apoptotic process [GO:0043066];negative regulation of gene expression [GO:0010629];nuclear-transcribed mRNA catabolic process, exonucleolytic, 5'-3' [GO:0034428];nuclear-transcribed mRNA catabolic process, nonsense-mediated decay [GO:00…	P-body [GO:0000932]";"cytoplasm [GO:0005737]	RNA binding [GO:0003723]";"5'-3' exonuclease activity [GO:0008409]	1	2.79616e-55	239.02	228.04	208.12	-1.9963	4041300000	2928200000	1113100000	396	2.76088	0.0347937	2.88406	-1.5421	1.04993	-1.14395	3.17795	-1.80233	2.55502	-1.24894	9.66696	1.07687	-0.293152	0.103362	0.104998	1.97229	-0.553382	2.55502
0.490138	0.42365	0.53944	0.0677764	-0.189996	-0.195232	0.0746053	0.0773357	0.0347371	-0.0905846	-0.0865262	-0.06046	-0.0532867	0.419379	0.354371	S	2	+	Casein kinase I substrate motif;Casein kinase I substrate motif;Casein kinase II substrate motif;Casein kinase II substrate motif;PKA kinase substrate motif;PKA kinase substrate motif;PKC kinase substrate motif;PKC kinase substrate motif;Pyruvate dehydrogenase kinase substrate motif;Pyruvate dehydrogenase kinase substrate motif	histone H3-K9 methylation [GO:0051567];regulation of chromatin silencing [GO:0031935]";RNA interference [GO:0016246]";"heterochromatin organization [GO:0070828]	cytosol [GO:0005829];nucleus [GO:0005634];polytene chromosome [GO:0005700];polytene chromosome chromocenter [GO:0005701];polytene chromosome puff [GO:0005703];polytene chromosome puff [GO:0005703]";RISC complex [GO:0016442]";"cytoplasm [GO:0005737]	mRNA binding [GO:0003729]	1	1.67224e-30	226.54	191.85	211.77	-0.053135	7881000000	5575300000	2305700000	152	2.75963	0.0346526	1.01109	-0.319345	0.943643	-0.345972	0.527035	-0.177928	0.738506	0.244255	3.22027	4.06788	-0.563599	2.49951	-0.590226	3.50705	-0.422183	0.738506
-0.261873	-0.766796	-0.693138	-0.168473	-0.125775	-0.228841	-0.0102186	-0.152165	-0.102422	0.22947	0.101131	0.00188081	-0.277023	-0.259132	-0.399817	S	2	+	Casein kinase I substrate motif;Casein kinase II substrate motif;G protein-coupled receptor kinase 1 substrate motif;MDC1 BRCT domain binding motif;Plk1 PBD domain binding motif;Pyruvate dehydrogenase kinase substrate motif	mRNA splicing, via spliceosome [GO:0000398];regulation of alternative mRNA splicing, via spliceosome [GO:0000381];spermatogenesis [GO:0007283]";"mitotic cell cycle [GO:0000278]	nucleus [GO:0005634];precatalytic spliceosome [GO:0071011];U2 snRNP [GO:0005686];U2-type prespliceosome [GO:0071004]";"catalytic step 2 spliceosome [GO:0071013]	RNA binding [GO:0003723]	0.999999	5.48533e-172	362.03	351.4	214.91	0.53787	58023000000	41180000000	16843000000	372	2.74657	0.0352251	2.22412	0.422818	1.21165	0.137628	1.67581	0.223722	0.733946	-0.261945	5.84553	1.79653	0.684763	1.17213	0.399573	1.39081	0.485667	0.733946
-0.226295	0.481018	0.155465	-0.00249635	-0.292265	-0.0361031	-0.748927	-0.460106	-0.223851	0.280997	-0.024789	0.477801	0.537592	1.50478	1.42245	S	3	+	Cdc2 kinase substrate motif;CDK kinase substrate motif;CDK1,2,4,6 kinase substrate motif;ERK1,2 kinase substrate motif;GSK-3, ERK1, ERK2, CDK5 substrate motif;WW domain binding motif	DNA replication-dependent nucleosome assembly [GO:0006335]";"CENP-A containing nucleosome assembly [GO:0034080]	nucleus [GO:0005634]";"nucleoplasm [GO:0005654]	histone binding [GO:0042393]	1	5.10981e-74	285.43	274.74	150.28	0.45471	106910000000	89851000000	17054000000	485	2.73979	0.0355312	1.24818	-0.910272	1.76298	-1.26523	2.04225	-1.63257	1.28688	-1.01821	6.34029	0.161353	0.107941	0.478974	-0.247017	1.13473	-0.614357	1.28688
-0.546141	-0.575169	-0.594487	-0.477882	-0.402892	-0.658716	0.220302	-0.129785	-0.140065	-0.170767	-0.0908221	-0.0953311	-0.447127	-0.298722	-0.110335	S	3	+	AMP-activated protein kinase substrate motif;b-Adrenergic Receptor kinase substrate motif;BARD1 BRCT domain binding motif;Casein kinase I substrate motif;Casein kinase II substrate motif;G protein-coupled receptor kinase 1 substrate motif;PKA kinase substrate motif	adaptation of rhodopsin mediated signaling [GO:0016062];calcium-mediated signaling [GO:0019722];cellular response to ethanol [GO:0071361];centriole replication [GO:0007099];deactivation of rhodopsin mediated signaling [GO:0016059];kinetochore organization [GO:0051383];metarhodopsin inactivation [GO:0016060];muscle cell cellular homeostasis [GO:0046716];photoreceptor cell axon guidance [GO:0072499…	centriole [GO:0005814];centrosome [GO:0005813];cytoplasm [GO:0005737];cytosol [GO:0005829];midbody [GO:0030496];mitotic spindle [GO:0072686];mitotic spindle pole [GO:0097431];myosin V complex [GO:0031475];myosin VI complex [GO:0031476];nucleoplasm [GO:0005654];nucleus [GO:0005634];rhabdomere [GO:0016028];spindle [GO:0005819]";"cell cortex [GO:0005938]	enzyme regulator activity [GO:0030234];myosin heavy chain binding [GO:0032036];myosin V binding [GO:0031489];myosin VI head/neck binding [GO:0070855]";"calcium ion binding [GO:0005509];calcium ion binding [GO:0005509]	1	8.66306e-52	259.96	235.47	68.42	-0.048164	8722300000	6431900000	2290500000	82	2.73588	0.0355959	0.758892	0.166421	0.856983	-0.227769	0.81114	0.268879	1.35983	-0.286538	3.78685	3.97948	0.452959	0.310691	0.058769	2.01708	0.555417	1.35983
NaN	0.417272	0.308477	NaN	-0.440224	-0.36325	NaN	0.545338	0.353549	NaN	0.253227	0.323786	NaN	0.282714	NaN	S	3	+	Casein kinase II substrate motif	negative regulation of neuron death [GO:1901215];pyruvate metabolic process [GO:0006090];response to ethanol [GO:0045471]";"acetaldehyde metabolic process [GO:0006117]	mitochondrial matrix [GO:0005759];mitochondrion [GO:0005739]";"cytoplasm [GO:0005737]	aldehyde dehydrogenase (NAD) activity [GO:0004029];glyceraldehyde-3-phosphate dehydrogenase (NAD+) (non-phosphorylating) activity [GO:0043878]";"acetaldehyde dehydrogenase (acetylating) activity [GO:0008774]	1	0.00202627	57.045	32.252	45.069	-1.154	17634000000	12058000000	5576000000	124	2.73243	0.0356701	-4.34294e-08	0	-4.34294e-08	0	-4.34294e-08	0	-4.34294e-08	0	0	0.431703	-0.0743677	2.12438	-0.764612	0.288551	0.0865686	0
NaN	0.417272	0.308477	NaN	-0.440224	-0.36325	NaN	0.545338	0.353549	NaN	0.253227	0.323786	NaN	0.282714	NaN	T	3	+	b-Adrenergic Receptor kinase substrate motif	negative regulation of neuron death [GO:1901215];pyruvate metabolic process [GO:0006090];response to ethanol [GO:0045471]";"acetaldehyde metabolic process [GO:0006117]	mitochondrial matrix [GO:0005759];mitochondrion [GO:0005739]";"cytoplasm [GO:0005737]	aldehyde dehydrogenase (NAD) activity [GO:0004029];glyceraldehyde-3-phosphate dehydrogenase (NAD+) (non-phosphorylating) activity [GO:0043878]";"acetaldehyde dehydrogenase (acetylating) activity [GO:0008774]	1	0.00202627	57.045	32.252	45.069	-1.154	17634000000	12058000000	5576000000	127	2.73243	0.0354872	-4.34294e-08	0	-4.34294e-08	0	-4.34294e-08	0	-4.34294e-08	0	0	0.431703	-0.0743677	2.12438	-0.764612	0.288551	0.0865686	0
NaN	0.417272	0.308477	NaN	-0.440224	-0.36325	NaN	0.545338	0.353549	NaN	0.253227	0.323786	NaN	0.282714	NaN	Y	3	+	ALK kinase substrate motif	negative regulation of neuron death [GO:1901215];pyruvate metabolic process [GO:0006090];response to ethanol [GO:0045471]";"acetaldehyde metabolic process [GO:0006117]	mitochondrial matrix [GO:0005759];mitochondrion [GO:0005739]";"cytoplasm [GO:0005737]	aldehyde dehydrogenase (NAD) activity [GO:0004029];glyceraldehyde-3-phosphate dehydrogenase (NAD+) (non-phosphorylating) activity [GO:0043878]";"acetaldehyde dehydrogenase (acetylating) activity [GO:0008774]	1	0.00202627	57.045	32.252	45.069	-1.154	17634000000	12058000000	5576000000	121	2.73243	0.0353061	-4.34294e-08	0	-4.34294e-08	0	-4.34294e-08	0	-4.34294e-08	0	0	0.431703	-0.0743677	2.12438	-0.764612	0.288551	0.0865686	0
0.124144	0.331934	0.102498	0.554103	0.303576	0.41577	0.142378	0.077189	NaN	-0.0971177	-0.0681657	-0.0340658	-0.126145	0.0616261	0.0724295	S	2	+	Casein kinase II substrate motif				0.979259	3.26647e-09	157.74	123.3	124.46	-0.73834	6657700000	4747400000	1910300000	636	2.72605	0.0357563	0.442867	-0.0690865	1.9151	0.421846	0.516465	0.107147	0.876598	0.183555	3.75103	1.54485	-0.252642	1.08823	0.238291	0.309453	-0.0764084	0.876598
1.83303	1.83182	1.75224	1.98269	1.76952	0.948576	2.01635	1.73795	1.38488	1.05347	0.72373	0.609218	0.845112	0.00460753	-0.00795834	S	2	+		signal transduction [GO:0007165]	cytoplasm [GO:0005737]	phosphatidylinositol transporter activity [GO:0008526]";"phosphatidylinositol binding [GO:0035091]	0.999228	4.75565e-38	225.18	212.39	185.13	0.11142	23457000000	11771000000	11686000000	255	2.72366	0.0357172	0.758551	0.514887	1.41559	1.28634	1.88428	1.43247	2.23853	1.52511	6.29695	2.75821	-1.01022	0.307657	-0.238765	0.192279	-0.0926326	2.23853
NaN	NaN	NaN	NaN	NaN	-0.0739702	NaN	-0.222667	-0.232972	NaN	0.219711	0.183201	NaN	NaN	NaN	S	2	+	b-Adrenergic Receptor kinase substrate motif;Casein kinase II substrate motif;Cdc2 kinase substrate motif;CDK kinase substrate motif;CDK1,2,4,6 kinase substrate motif;ERK1,2 kinase substrate motif;GSK-3, ERK1, ERK2, CDK5 substrate motif;PKA kinase substrate motif;PKC kinase substrate motif;WW domain binding motif	protein refolding [GO:0042026]";"mRNA splicing, via spliceosome [GO:0000398]	cytosol [GO:0005829];nucleoplasm [GO:0005654];nucleus [GO:0005634];precatalytic spliceosome [GO:0071011]";"catalytic step 2 spliceosome [GO:0071013]	unfolded protein binding [GO:0051082]";"peptidyl-prolyl cis-trans isomerase activity [GO:0003755]	1	1.01527e-05	150.21	124.73	120.54	0.14336	83943000	53184000	30758000	666	2.71068	0.036191	-4.34294e-08	0	-4.34294e-08	0	-4.34294e-08	0	-4.34294e-08	0	0	0	NaN	0	NaN	0	NaN	-4.34294e-08
-0.222243	1.55642	1.72757	-0.270916	0.19903	0.232913	-1.68919	-1.84508	-1.79052	-1.02217	-0.844863	-0.995972	-0.97333	0.241697	0.277218	S	2	+	Cdc2 kinase substrate motif;CDK kinase substrate motif;CDK1,2,4,6 kinase substrate motif;ERK1,2 kinase substrate motif;Growth associated histone HI kinase substrate motif;GSK-3, ERK1, ERK2, CDK5 substrate motif;PKA kinase substrate motif;PKC kinase substrate motif;WW domain binding motif	embryonic development via the syncytial blastoderm [GO:0001700];regulation of cell cycle phase transition [GO:1901987];regulation of DNA-dependent DNA replication initiation [GO:0030174];telomere maintenance [GO:0000723]";"cell cycle [GO:0007049]	heterochromatin [GO:0000792];nuclear heterochromatin [GO:0005720];nucleus [GO:0005634];polytene chromosome band [GO:0005704];polytene chromosome chromocenter [GO:0005701]";polytene chromosome, telomeric region [GO:0035012];"chromosome [GO:0005694]		1	6.41142e-42	214.16	214.16	198.83	0.13001	14022000000	11747000000	2274100000	847	2.71029	0.03604	0.90314	-0.802863	0.176058	0.205147	1.76521	-1.62346	0.717642	1.17205	3.56205	1.4644	-1.97492	0.682386	-0.966906	1.9565	-2.79551	0.717642
-0.174436	-0.324788	-0.207794	0.131589	0.704065	0.552644	-0.266235	-0.442593	-0.622976	-0.833259	-0.167004	-0.652532	-0.623621	-0.668523	-0.308802	T	2	+	Cdc2 kinase substrate motif;CDK1,2,4,6 kinase substrate motif;CDK5 kinase substrate motif;G protein-coupled receptor kinase 1 substrate motif;Growth associated histone HI kinase substrate motif;GSK-3, ERK1, ERK2, CDK5 substrate motif;WW domain binding motif	regulation of mRNA splicing, via spliceosome [GO:0048024]";"mRNA splicing, via spliceosome [GO:0000398]	chromosome [GO:0005694];precatalytic spliceosome [GO:0071011]";"catalytic step 2 spliceosome [GO:0071013]	metal ion binding [GO:0046872];nucleic acid binding [GO:0003676]";single-stranded DNA binding [GO:0003697];single-stranded RNA binding [GO:0003727]";"DNA binding [GO:0003677];"metal ion binding [GO:0046872]	0.999994	1.281e-21	224.09	151.51	224.09	0.24041	15399000000	11727000000	3672300000	638	2.70846	0.03601	0.02529	-0.0172828	2.08015	0.996415	0.229773	0.0897141	1.14856	0.297976	3.48377	0.70489	-0.315259	1.77094	0.698439	0.859749	-0.208262	1.14856
1.88779	1.6102	NaN	2.28684	1.81852	1.65233	2.09952	1.68567	1.35202	1.0547	0.219958	0.603949	0.848874	-0.113458	0.120441	T	3	+	G protein-coupled receptor kinase 1 substrate motif;PKA kinase substrate motif	signal transduction [GO:0007165]	cytoplasm [GO:0005737]	phosphatidylinositol transporter activity [GO:0008526]";"phosphatidylinositol binding [GO:0035091]	0.601813	0.000119468	84.071	73.522	76.586	0.43799	5890400000	2945900000	2944500000	254	2.7061	0.0359802	0.37984	0.340917	2.03619	1.63394	1.77327	1.42712	1.48625	1.46371	5.67555	1.37886	-1.12279	0.245703	0.170238	0.0409843	-0.0365874	1.48625
0.184022	0.805674	0.80523	-0.187723	-0.32284	-0.323701	-0.0187011	-0.109092	-0.0825242	-0.292451	-0.270181	-0.0267386	-0.0604811	-0.35848	0.0122623	S	3	+	14-3-3 domain binding motif;Calmodulin-dependent protein kinase II substrate motif;Casein kinase II substrate motif;DNA dependent Protein kinase substrate motif;ERK1,2 kinase substrate motif;G protein-coupled receptor kinase 1 substrate motif;GSK-3, ERK1, ERK2, CDK5 substrate motif;PKA kinase substrate motif;PKC kinase substrate motif;WW domain binding motif;ZIP kinase substrate motif	negative regulation of mRNA polyadenylation [GO:1900364];regulation of mRNA stability [GO:0043488]";"negative regulation of gene expression [GO:0010629]	neuron projection [GO:0043005];nucleus [GO:0005634];plasma membrane bounded cell projection cytoplasm [GO:0032838]";"cytoplasm [GO:0005737]	poly(A) binding [GO:0008143];sequence-specific mRNA binding [GO:1990825]";"metal ion binding [GO:0046872]	1	5.89344e-15	176.85	158.28	150.61	-0.40217	17876000000	13018000000	4857400000	391	2.69752	0.0365517	0.161318	-0.0608904	0.511592	-0.142522	0.218733	0.0654605	1.4442	0.733875	2.33585	1.62304	-0.794765	1.84011	-0.876397	1.48284	-0.668415	1.4442
NaN	-0.0798171	-0.0692169	NaN	1.30417	1.0125	NaN	-0.0239017	0.225978	NaN	0.0180514	-0.0773355	NaN	-0.0946762	0.179855	S	2	+	Casein kinase II substrate motif;ERK1,2 kinase substrate motif;Growth associated histone HI kinase substrate motif;GSK-3, ERK1, ERK2, CDK5 substrate motif;WW domain binding motif	inositol phosphorylation [GO:0052746]";"inositol phosphate biosynthetic process [GO:0032958]	nucleus [GO:0005634]	inositol pentakisphosphate 2-kinase activity [GO:0035299]";"ATP binding [GO:0005524]	0.999604	1.05533e-07	161.2	130.51	72.031	-0.25028	2180800000	1513700000	667070000	9	2.69705	0.036402	0.174959	-0.0722313	1.51226	1.11575	0.106429	0.0584486	0.315392	-0.117106	2.10904	0.348303	0.0448749	1.86251	1.23285	0.529447	0.175555	0.315392
0.386933	0.467801	0.818851	0.0156021	-0.287794	0.0526941	0.274665	0.0486547	0.273456	0.104055	-0.02869	-0.0740765	-0.168072	-0.293428	-0.0260434	S	3	+	Casein kinase II substrate motif;G protein-coupled receptor kinase 1 substrate motif;MAPKAPK2 kinase substrate motif	temperature compensation of the circadian clock [GO:0010378]";"entrainment of circadian clock [GO:0009649]			0.998676	1.44633e-19	168.69	162.86	90.946	-0.50424	8387700000	6352900000	2034800000	983	2.69213	0.0364488	0.801929	0.162944	0.269615	0.0893489	1.54584	0.36144	2.02961	0.720376	4.64699	1.75591	-0.557432	1.67835	-0.631027	1.10768	-0.358936	2.02961
-0.568898	-0.430419	-0.181162	-0.493235	-0.443791	0.0209612	0.154324	0.0761915	0.221866	0.0713235	0.0838882	0.178769	NaN	-0.745493	-0.582568	S	2	+	b-Adrenergic Receptor kinase substrate motif;Casein kinase II substrate motif;Pyruvate dehydrogenase kinase substrate motif		endoplasmic reticulum [GO:0005783];endoplasmic reticulum membrane [GO:0005789];fusome [GO:0045169];integral component of membrane [GO:0016021]";"endomembrane system [GO:0012505]		0.971173	3.92959e-214	414.38	396.98	391.06	-0.11269	4181800000	3168300000	1013500000	245	2.69146	0.0363301	2.71669	0.775357	0.695721	0.358676	2.67195	0.814824	0.729389	0.270538	6.81375	1.8855	0.50482	0.166804	0.088138	1.9651	0.544287	0.729389
0.0532884	-0.0703887	0.0690329	0.14008	0.285829	0.265255	-0.0771481	-0.107118	-0.0957521	-0.124342	-0.168566	0.00550314	-0.253174	-0.0210287	-0.285415	S	2	+	Cdc2 kinase substrate motif;CDK kinase substrate motif;CDK1,2,4,6 kinase substrate motif;ERK1,2 kinase substrate motif;Growth associated histone HI kinase substrate motif;GSK-3, ERK1, ERK2, CDK5 substrate motif;MDC1 BRCT domain binding motif;Plk1 PBD domain binding motif;WW domain binding motif	chromatin remodeling [GO:0006338];germ-line stem-cell niche homeostasis [GO:0060250];male germ-line stem cell asymmetric division [GO:0048133];mitotic spindle assembly checkpoint [GO:0007094];mitotic spindle elongation [GO:0000022];mRNA transport [GO:0051028];positive regulation of cell division [GO:0051781];positive regulation of intracellular protein transport [GO:0090316];positive regulation o…	cytoplasm [GO:0005737];metaphase plate [GO:0070090];midbody [GO:0030496];mitotic spindle [GO:0072686];nuclear envelope [GO:0005635];nuclear euchromatin [GO:0005719];nuclear inclusion body [GO:0042405];nuclear lamina [GO:0005652];nuclear matrix [GO:0016363];nuclear membrane [GO:0031965];nuclear periphery [GO:0034399];nuclear pore [GO:0005643];nucleolus [GO:0005730];nucleoplasm [GO:0005654];nucleus…	ribonucleoprotein complex binding [GO:0043021];structural constituent of nuclear pore [GO:0017056]";"chromatin DNA binding [GO:0031490]	0.98768	6.19996e-222	392.74	384.82	392.74	0.85203	29711000000	21706000000	8004400000	2148	2.68284	0.036686	0.389095	0.0907376	1.92962	0.416927	0.484042	0.0932	1.01539	0.20385	3.81815	0.761199	-0.113112	1.5488	0.213077	1.15779	-0.11065	1.01539
-0.70776	-0.783492	-1.11632	-0.306872	-0.0209632	-0.0349912	-0.148876	-0.1458	-0.176613	0.236558	0.359632	0.109535	-0.504772	0.249924	-0.412089	S	3	+	Casein kinase II substrate motif;MAPKAPK2 kinase substrate motif;PKA kinase substrate motif;PKC kinase substrate motif	regulation of alternative mRNA splicing, via spliceosome [GO:0000381]";"mRNA processing [GO:0006397]	nucleus [GO:0005634];small-subunit processome [GO:0032040]";"nucleolus [GO:0005730]	nucleic acid binding [GO:0003676]	1	6.44729e-246	425.16	401.28	416.13	0.61691	24294000000	17725000000	6569500000	1112	2.67858	0.0368942	0.856296	0.457554	0.147832	0.10137	0.0982684	0.0652157	1.13207	-0.64688	2.23447	2.79983	1.10443	2.05979	0.74825	2.3178	0.712096	1.13207
-0.375783	-0.499578	-0.568273	-0.0611161	0.0652116	0.0487701	-0.250846	-0.137295	0.0533175	-0.0958855	0.197959	-0.10199	-0.291282	-0.399589	-0.59774	S	2	+	14-3-3 domain binding motif;Calmodulin-dependent protein kinase II substrate motif;Casein kinase II substrate motif;PKA kinase substrate motif;PKC kinase substrate motif	actin filament-based process [GO:0030029];anterior/posterior pattern specification [GO:0009952];branching involved in open tracheal system development [GO:0060446];cortical actin cytoskeleton organization [GO:0030866];cortical microtubule organization [GO:0043622];cytoskeleton organization [GO:0007010];determination of left/right symmetry [GO:0007368];establishment or maintenance of apical/basal …	apical plasma membrane [GO:0016324];cell cortex [GO:0005938];cleavage furrow [GO:0032154];cytoplasm [GO:0005737];cytosol [GO:0005829];mitotic spindle midzone [GO:1990023];nucleoplasm [GO:0005654];nucleus [GO:0005634];plasma membrane [GO:0005886];polytene chromosome puff [GO:0005703];subapical complex [GO:0035003];transcriptionally active chromatin [GO:0035327]";"adherens junction [GO:0005912];cyt…	cytoskeletal protein binding [GO:0008092];microtubule binding [GO:0008017];phosphatidylinositol-4,5-bisphosphate binding [GO:0005546]";"actin binding [GO:0003779];actin binding [GO:0003779]	0.999745	0.000530861	116.73	60.071	116.73	0.44002	1783600000	1333000000	450640000	259	2.67789	0.0367368	1.48916	0.429565	1.98498	0.447159	1.18441	0.317929	0.186265	-0.0516744	4.84482	1.87238	0.481239	2.71457	0.498833	1.61038	0.369604	0.186265
0.0242517	0.206571	0.236514	0.0226832	-0.0362941	-0.0444982	-0.316788	-0.541386	-0.471883	-0.315272	-0.198306	-0.201592	-0.170017	0.305416	0.30894	S	2	+	14-3-3 domain binding motif;Aurora-A kinase substrate motif;Calmodulin-dependent protein kinase II substrate motif;Casein kinase II substrate motif;PAK2 kinase substrate motif;Phosphorylase kinase substrate motif;PKA kinase substrate motif;PKC epsilon kinase substrate motif;PKC kinase substrate motif	border follicle cell migration [GO:0007298];germ cell migration [GO:0008354];microtubule depolymerization [GO:0007019];microtubule-based process [GO:0007017];nervous system development [GO:0007399];neuron projection development [GO:0031175];regulation of cytoskeleton organization [GO:0051493];regulation of microtubule polymerization or depolymerization [GO:0031110];synaptic growth at neuromuscula…	cytosol [GO:0005829];microtubule associated complex [GO:0005875];neuromuscular junction [GO:0031594];neuron projection [GO:0043005]";"cytoplasm [GO:0005737]	tubulin binding [GO:0015631]";"microtubule binding [GO:0008017]	1	1.10242e-07	138.36	52.617	77.541	-0.35523	20247000000	15418000000	4828400000	67	2.6778	0.0365714	1.11062	-0.386503	0.449105	-0.167483	1.57675	-0.591466	0.0147295	0.00766606	3.15121	2.1684	-0.394169	1.18271	-0.175149	2.5102	-0.599132	0.0147295
0.443839	0.450227	0.490705	0.93188	0.785425	0.348972	0.234452	-0.198393	-0.149231	0.00501524	-0.519375	-0.623905	NaN	1.64359	0.806695	S	3	+	b-Adrenergic Receptor kinase substrate motif;Casein kinase I substrate motif;Casein kinase II substrate motif;ERK1,2 kinase substrate motif;GSK-3, ERK1, ERK2, CDK5 substrate motif;WW domain binding motif	defense response to fungus [GO:0050832];gene silencing by miRNA [GO:0035195];mRNA catabolic process [GO:0006402];pole plasm oskar mRNA localization [GO:0045451]";"cytoplasmic mRNA processing body assembly [GO:0033962]	P-body [GO:0000932]		0.999991	1.8013e-222	409.89	403.63	409.89	3.6004	3492700000	2584000000	908740000	576	2.66868	0.036872	1.55462	-1.60456	0.588352	-0.536382	1.41087	-1.26286	1.03526	-0.763551	4.58911	1.90153	-0.841012	0.575723	0.227169	1.65384	-0.499314	1.03526
0.676924	0.794695	0.773277	0.445287	NaN	0.331925	0.110319	0.287242	-0.0455644	0.459514	0.190332	0.226322	0.520347	0.830093	0.972252	S	3	+	ERK1,2 kinase substrate motif;GSK-3, ERK1, ERK2, CDK5 substrate motif;WW domain binding motif	axonogenesis [GO:0007409];bicellular tight junction assembly [GO:0070830];dendrite morphogenesis [GO:0048813];establishment or maintenance of neuroblast polarity [GO:0045196];microtubule cytoskeleton organization [GO:0000226];microtubule cytoskeleton organization involved in mitosis [GO:1902850];negative regulation of microtubule polymerization [GO:0031115];positive regulation of GTPase activity …	bicellular tight junction [GO:0005923];lateral plasma membrane [GO:0016328]";"adherens junction [GO:0005912]	GTPase activator activity [GO:0005096]";"beta-tubulin binding [GO:0048487]	0.999999	2.81093e-73	248.92	242.63	199.27	0.30592	6543000000	4455300000	2087700000	174	2.66861	0.0366981	1.42186	-0.482175	0.928287	-0.385624	1.79047	-0.656898	0.0653341	-0.0259319	4.20595	2.11596	-0.456243	1.97196	-0.359693	2.44813	-0.630966	0.0653341
0.109431	0.764397	0.565001	0.591972	0.750119	0.525341	0.170577	0.222875	0.35656	NaN	-0.00201459	-0.0338404	NaN	1.51379	1.09221	S	2	+	Casein kinase I substrate motif;Casein kinase II substrate motif;G protein-coupled receptor kinase 1 substrate motif;GSK3 kinase substrate motif	meiotic chromosome segregation [GO:0045132];mitotic sister chromatid cohesion [GO:0007064];post-translational protein acetylation [GO:0034421];regulation of DNA replication [GO:0006275];sister chromatid cohesion [GO:0007062]";"histone acetylation [GO:0016573]	nuclear chromatin [GO:0000790]	metal ion binding [GO:0046872]";"acetyltransferase activity [GO:0016407]	0.999992	1.43371e-44	228.33	217.4	228.33	1.7774	2195800000	1427500000	768280000	176	2.66572	0.0367606	1.60788	-1.32093	1.49445	-0.680523	2.05306	-1.053	1.16363	-0.823391	6.31903	0.850082	-0.497538	0.280514	0.142867	0.497177	-0.229606	1.16363
0.109431	0.764397	0.565001	0.591972	0.750119	0.525341	0.170577	0.222875	0.35656	NaN	-0.00201459	-0.0338404	NaN	1.51379	1.09221	S	2	+	Casein kinase II substrate motif;ERK1,2 kinase substrate motif;GSK-3, ERK1, ERK2, CDK5 substrate motif;MDC1 BRCT domain binding motif;Plk1 PBD domain binding motif;WW domain binding motif	meiotic chromosome segregation [GO:0045132];mitotic sister chromatid cohesion [GO:0007064];post-translational protein acetylation [GO:0034421];regulation of DNA replication [GO:0006275];sister chromatid cohesion [GO:0007062]";"histone acetylation [GO:0016573]	nuclear chromatin [GO:0000790]	metal ion binding [GO:0046872]";"acetyltransferase activity [GO:0016407]	0.999982	1.43371e-44	228.33	217.4	228.33	1.7774	2195800000	1427500000	768280000	177	2.66572	0.0365888	1.60788	-1.32093	1.49445	-0.680523	2.05306	-1.053	1.16363	-0.823391	6.31903	0.850082	-0.497538	0.280514	0.142867	0.497177	-0.229606	1.16363
-0.0535505	-0.339832	-0.167948	0.842684	0.532602	0.604029	0.093281	-0.377631	-0.235782	-0.0235297	0.108562	-0.00713788	0.132654	-0.532525	-0.279491	S	2	+	ERK1,2 kinase substrate motif;G protein-coupled receptor kinase 1 substrate motif;GSK-3, ERK1, ERK2, CDK5 substrate motif;PKA kinase substrate motif;PKC kinase substrate motif;WW domain binding motif	exocytosis [GO:0006887];Golgi organization [GO:0007030];macroautophagy [GO:0016236];protein secretion [GO:0009306]";"endoplasmic reticulum organization [GO:0007029]	integral component of membrane [GO:0016021];phagophore assembly site [GO:0000407]";"endoplasmic reticulum [GO:0005783]		1	1.40562e-14	176.36	167.53	147.31	0.2042	20816000000	15611000000	5205700000	504	2.66506	0.0364744	0.565595	0.252419	1.83378	0.886226	0.0783135	0.0530767	0.0649378	0.0393443	2.54263	1.07697	0.213075	2.60164	0.846882	0.0284104	0.0137324	0.0649378
-0.0382024	0.374891	0.339	0.476159	0.68168	0.556241	0.48994	0.238101	0.209511	-0.171039	0.154255	0.2093	0.6717	0.906687	1.07057	S	2	+	Casein kinase II substrate motif;ERK1,2 kinase substrate motif;GSK-3, ERK1, ERK2, CDK5 substrate motif;PKA kinase substrate motif;PKC kinase substrate motif;WW domain binding motif	flight behavior [GO:0007629];molting cycle, chitin-based cuticle [GO:0007591];multicellular organism development [GO:0007275];response to ecdysone [GO:0035075];spliceosomal snRNP assembly [GO:0000387]";"adult locomotory behavior [GO:0008344]	cytoplasmic U snRNP body [GO:0071254];nucleus [GO:0005634];SMN complex [GO:0032797]";"cytoplasm [GO:0005737]		1	2.28525e-28	219.53	206.52	151.66	-0.65954	10030000000	6697400000	3332300000	980	2.64834	0.0372315	2.10674	-0.818813	1.12481	-0.311625	1.75794	-0.570468	1.69808	-0.657756	6.68757	0.381156	-0.161057	1.12238	0.346131	0.212545	0.0872876	1.69808
-0.496435	-0.554708	-0.662285	-0.300896	-0.00998836	-0.111684	-0.411371	-0.474271	-0.288878	0.168893	-0.116854	-0.150725	-0.296091	-0.147203	-0.226579	S	2	+	Cdc2 kinase substrate motif;CDK kinase substrate motif;CDK1,2,4,6 kinase substrate motif;ERK1,2 kinase substrate motif;Growth associated histone HI kinase substrate motif;GSK-3, ERK1, ERK2, CDK5 substrate motif;WW domain binding motif	protein transport [GO:0015031]";"Golgi to endosome transport [GO:0006895]	endosome [GO:0005768];Golgi membrane [GO:0000139];trans-Golgi network [GO:0005802]";"cytosol [GO:0005829]		0.98931	0.000595809	110.8	82.887	98.368	-0.58871	1959000000	1441300000	517640000	523	2.64585	0.0371889	0.798996	0.190395	0.359922	0.0824349	1.14031	-0.168215	2.23349	-0.347852	4.53271	2.05941	0.538247	1.92739	0.430287	1.15787	0.179636	2.23349
1.31682	1.19063	1.68816	0.694924	0.480266	0.351801	0.873324	1.12127	0.376564	0.580087	0.318997	0.273431	0.34793	-0.806872	-0.346134	S	2	+	14-3-3 domain binding motif;Aurora-A kinase substrate motif;Calmodulin-dependent protein kinase II alpha substrate motif;Calmodulin-dependent protein kinase II substrate motif;Calmodulin-dependent protein kinase IV substrate motif;Casein kinase II substrate motif;Chk1 kinase substrate motif;G protein-coupled receptor kinase 1 substrate motif;PAK2 kinase substrate motif;Phosphorylase kinase substr…	regulation of transcription by RNA polymerase II [GO:0006357]	PcG protein complex [GO:0031519]";"nucleus [GO:0005634]	zinc ion binding [GO:0008270]";"DNA-binding transcription factor activity [GO:0003700]	1	5.46214e-09	162.37	145.13	107.11	0.23012	22280000000	12186000000	10094000000	299	2.64355	0.0371376	0.879776	0.659197	1.0426	0.777356	1.24068	1.05874	1.97818	1.66689	5.14123	2.32532	-1.0077	2.10957	-0.889539	1.07875	-0.608151	1.97818
-0.342339	-0.847664	-0.946861	0.295777	-0.0561312	-0.0317839	0.00153653	0.0610024	0.0114482	0.550945	0.238697	0.217976	-0.341811	-0.392117	0.108625	S	2	+	b-Adrenergic Receptor kinase substrate motif;Casein kinase I substrate motif;Casein kinase II substrate motif;G protein-coupled receptor kinase 1 substrate motif;Pyruvate dehydrogenase kinase substrate motif	positive regulation of transcription elongation from RNA polymerase II promoter [GO:0032968];regulation of hemocyte proliferation [GO:0035206];transcription elongation from RNA polymerase II promoter [GO:0006368]";"histone modification [GO:0016570]	nucleus [GO:0005634]";"Cdc73/Paf1 complex [GO:0016593]	RNA polymerase II C-terminal domain phosphoserine binding [GO:1990269]	1	1.96078e-40	229.35	214.72	94.776	0.28033	6825700000	5032500000	1793200000	666	2.64209	0.0371233	1.32557	0.544307	0.641198	0.277722	0.658612	0.233097	0.960089	-0.503853	3.58547	2.08002	1.04816	1.63153	0.781575	1.76264	0.73695	0.960089
-0.208773	-0.22216	-0.0940936	-0.258716	-0.542722	-0.475066	-0.227059	-0.559826	-0.508314	-0.197307	-0.0460777	-0.0226772	0.0167097	0.685694	0.724683	S	3	+	AMP-activated protein kinase substrate motif;Cdc2 kinase substrate motif;CDK kinase substrate motif;CDK1,2,4,6 kinase substrate motif;ERK1,2 kinase substrate motif;Growth associated histone HI kinase substrate motif;GSK-3, ERK1, ERK2, CDK5 substrate motif;MAPKAPK2 kinase substrate motif;PKA kinase substrate motif;PKC kinase substrate motif;WW domain binding motif	cell division [GO:0051301];chromosome condensation [GO:0030261];DNA damage checkpoint [GO:0000077];histone H4-K20 monomethylation [GO:0034771];histone methylation [GO:0016571];negative regulation of histone acetylation [GO:0035067]";"cell cycle [GO:0007049]	polytene chromosome [GO:0005700]";"nucleus [GO:0005634]	histone methyltransferase activity (H4-K20 specific) [GO:0042799];histone-lysine N-methyltransferase activity [GO:0018024]	1	7.04386e-20	178.71	178.71	130.02	0.55832	10280000000	7595100000	2685400000	392	2.63903	0.0372	1.12371	-0.564383	1.67174	-0.901197	1.64339	-0.907429	1.30647	-0.650705	5.74532	0.562048	0.0863218	1.24075	-0.250492	1.08626	-0.256724	1.30647
0.155667	0.235297	0.272511	-0.55	-0.292104	-0.119552	-0.521504	-0.113208	NaN	-0.447519	-0.452313	-0.394693	0.0677949	0.618709	0.618516	T	2	+	Casein kinase I substrate motif;GSK-3, ERK1, ERK2, CDK5 substrate motif;RAF1 kinase substrate motif;WW domain binding motif	cellular response to ethanol [GO:0071361];circadian rhythm [GO:0007623];germ cell development [GO:0007281];negative regulation of Ras protein signal transduction [GO:0046580];positive regulation of Notch signaling pathway [GO:0045747];positive regulation of protein localization to membrane [GO:1905477];regulation of actin cytoskeleton organization [GO:0032956];regulation of actin cytoskeleton reo…	cytoskeleton [GO:0005856];cytosol [GO:0005829];plasma membrane [GO:0005886]";"cytoplasm [GO:0005737]	kinase activity [GO:0016301];Notch binding [GO:0005112];protein kinase A regulatory subunit binding [GO:0034237]";"actin filament binding [GO:0051015];kinase activity [GO:0016301]	1	1.21702e-68	275.21	266.38	150.14	0.88922	2279100000	1754600000	524490000	111	2.63737	0.0371493	2.02976	-0.866515	1.5646	-0.755559	1.12135	-0.752363	0.500086	-0.213848	5.2158	4.12243	-0.652667	1.85487	-0.541711	1.371	-0.538514	0.500086
0.615773	0.399554	0.246712	NaN	0.0483406	0.165301	-0.139378	0.0223365	-0.0613543	NaN	-0.343222	-0.353966	-0.952238	NaN	NaN	S	2	+	G protein-coupled receptor kinase 1 substrate motif;MAPKAPK2 kinase substrate motif;PKA kinase substrate motif;PKC kinase substrate motif	chromatin assembly or disassembly [GO:0006333];histone acetylation [GO:0016573];negative regulation of transcription, DNA-templated [GO:0045892];nervous system development [GO:0007399];nucleosome assembly [GO:0006334];nucleosome mobilization [GO:0042766];nucleosome positioning [GO:0016584];regulation of ATPase activity [GO:0043462];regulation of heterochromatin assembly [GO:0031445];regulation of…	CHRAC [GO:0008623];nucleus [GO:0005634]";"ACF complex [GO:0016590]	metal ion binding [GO:0046872];nucleosome-dependent ATPase activity [GO:0070615];transferase activity, transferring acyl groups [GO:0016746]";"DNA binding [GO:0003677]	1	2.11081e-13	189.51	164.92	37.886	0.27287	511730000	339450000	172280000	1321	2.63672	0.037027	-4.34294e-08	0	-4.34294e-08	0	-4.34294e-08	0	-4.34294e-08	0	0	1.9409	-0.769274	0.924668	-0.313859	1.83203	-0.480145	0
0.305869	0.691802	0.389373	0.100466	-0.110978	-0.158679	-0.0422717	-0.319552	-0.236522	0.0479639	-0.410547	-0.410742	NaN	0.406289	0.686575	S	3	+	BARD1 BRCT domain binding motif;Casein kinase II substrate motif;G protein-coupled receptor kinase 1 substrate motif	rhabdomere development [GO:0042052]";"regulated exocytosis [GO:0045055]	intracellular membrane-bounded organelle [GO:0043231]	Rab GTPase binding [GO:0017137]	1	7.3439e-63	237.98	223.18	196.06	-0.42412	4288800000	3169500000	1119300000	244	2.63236	0.0372018	1.43508	-0.804207	1.58454	-0.602829	1.81514	-0.74588	0.168401	-0.0840836	5.00317	1.69562	-0.720123	1.66608	-0.518745	2.00613	-0.661797	0.168401
0.322159	0.32945	0.527371	NaN	-0.013723	-0.476311	0.0984196	-0.100166	-0.148734	NaN	-0.435163	-0.515204	NaN	0.353031	0.328951	S	2	+	Casein kinase II substrate motif;Cdc2 kinase substrate motif;CDK kinase substrate motif;CDK1,2,4,6 kinase substrate motif;ERK1,2 kinase substrate motif;Growth associated histone HI kinase substrate motif;GSK-3, ERK1, ERK2, CDK5 substrate motif;PKA kinase substrate motif;PKC kinase substrate motif;WW domain binding motif	negative regulation of chromatin silencing [GO:0031936];negative regulation of transcription, DNA-templated [GO:0045892];response to ecdysone [GO:0035075];transcription, DNA-templated [GO:0006351]";"chromatin organization [GO:0006325]	nucleus [GO:0005634];polytene chromosome [GO:0005700]";"chromatin [GO:0000785]	DNA binding [GO:0003677];metal ion binding [GO:0046872];sequence-specific DNA binding [GO:0043565]";"chromatin insulator sequence binding [GO:0043035];nucleic acid binding [GO:0003676]	0.996436	5.551e-05	144.79	66.644	144.79	-0.25554	5932600000	4490100000	1442500000	124	2.62091	0.0379911	2.58308	-0.816175	0.895859	-0.586008	1.5501	-0.391151	0.226855	0.052002	5.25589	2.6015	-0.868177	1.3416	-0.63801	1.92554	-0.443154	0.226855
0.277246	0.388949	0.335645	0.209636	0.33182	0.447413	0.316904	0.248163	0.158039	-0.154473	-0.194934	0.0513185	-0.184847	0.149931	-0.0241826	S	2	+	14-3-3 domain binding motif;Calmodulin-dependent protein kinase II substrate motif;Casein kinase II substrate motif;G protein-coupled receptor kinase 1 substrate motif;Phosphorylase kinase substrate motif;PKA kinase substrate motif;PKC epsilon kinase substrate motif;PKC kinase substrate motif				1	1.9924e-11	160.02	150.88	151.63	0.38576	2871600000	1924300000	947290000	114	2.61581	0.0383733	0.257392	-0.0796635	1.37546	0.349322	1.14538	0.260735	1.59214	0.353646	4.37036	2.19618	-0.43331	0.0189645	-0.00432411	0.760658	-0.0929116	1.59214
0.277246	0.388949	0.335645	0.209636	0.33182	0.447413	0.316904	0.248163	0.158039	-0.154473	-0.194934	0.0513185	-0.184847	0.149931	-0.0241826	S	2	+	ERK1,2 kinase substrate motif;G protein-coupled receptor kinase 1 substrate motif;GSK3 kinase substrate motif;GSK-3, ERK1, ERK2, CDK5 substrate motif;WW domain binding motif				0.999997	1.9924e-11	160.02	150.88	160.02	0.022064	2871600000	1924300000	947290000	116	2.61581	0.0382035	0.257392	-0.0796635	1.37546	0.349322	1.14538	0.260735	1.59214	0.353646	4.37036	2.19618	-0.43331	0.0189645	-0.00432411	0.760658	-0.0929116	1.59214
-0.766555	-0.614163	-0.587729	NaN	-0.318002	-0.201136	-0.388446	-0.428939	-0.434257	-0.345949	-0.035211	-0.215093	-0.363364	-0.302868	-0.422484	S	2	+	Casein kinase II substrate motif;DNA dependent Protein kinase substrate motif;PKA kinase substrate motif;PKC kinase substrate motif	actin cytoskeleton reorganization [GO:0031532];apical constriction involved in gastrulation [GO:0003384];assembly of apicomedial cortex actomyosin [GO:0106036];cortical protein anchoring [GO:0032065];dorsal closure [GO:0007391];epidermis development [GO:0008544];establishment of imaginal disc-derived wing hair orientation [GO:0001737];establishment of ommatidial planar polarity [GO:0042067];estab…	cell cortex [GO:0005938];cell cortex [GO:0005938]";cell-cell contact zone [GO:0044291];cytoskeleton [GO:0005856]";"apicomedial cortex [GO:0106037];"cell-cell contact zone [GO:0044291]	GTPase binding [GO:0051020];metal ion binding [GO:0046872];protein serine/threonine kinase activity [GO:0004674];Rho GTPase binding [GO:0017048]";"ATP binding [GO:0005524]	0.998089	4.09198e-05	134.14	93.913	123.71	0.11996	5268800000	4007100000	1261700000	443	2.61563	0.0380529	0.785073	0.164154	0.708003	0.103337	0.656581	-0.0543087	1.95666	-0.293243	4.10632	1.90436	0.457398	1.74332	0.39658	1.84587	0.238935	1.95666
NaN	0.826274	0.64441	NaN	0.237931	0.187388	NaN	0.133437	0.259466	NaN	-0.160171	-0.31068	NaN	0.734829	0.481816	T	2	+	G protein-coupled receptor kinase 1 substrate motif;GSK-3, ERK1, ERK2, CDK5 substrate motif;MAPKAPK2 kinase substrate motif;MDC1 BRCT domain binding motif;Plk1 PBD domain binding motif;WW domain binding motif	spliceosomal complex assembly [GO:0000245]";"mRNA splicing, via spliceosome [GO:0000398]	precatalytic spliceosome [GO:0071011];U12-type spliceosomal complex [GO:0005689];U2 snRNP [GO:0005686];U2-type prespliceosome [GO:0071004]";"catalytic step 2 spliceosome [GO:0071013]	RNA binding [GO:0003723]";"mRNA binding [GO:0003729]	0.877587	2.64855e-19	161.41	153.74	126.6	0.25727	630470000	404970000	225500000	336	2.61562	0.037886	1.53592	-0.843747	1.03673	-0.395663	0.99853	-0.411871	0.30055	0.12702	3.87172	1.83972	-0.970767	1.50736	-0.522683	1.40169	-0.538891	0.30055
-0.429032	-0.574302	-0.619639	NaN	-0.124213	-0.152488	-0.562984	-0.138615	-0.214205	0.0411028	-0.0259638	0.0550975	-0.704818	-0.470063	-0.460971	S	2	+	14-3-3 domain binding motif;Calmodulin-dependent protein kinase II substrate motif;Cdc2 kinase substrate motif;CDK kinase substrate motif;CDK1,2,4,6 kinase substrate motif;ERK1,2 kinase substrate motif;GSK-3, ERK1, ERK2, CDK5 substrate motif;PKA kinase substrate motif;PKC kinase substrate motif;WW domain binding motif	border follicle cell migration [GO:0007298];cell dedifferentiation [GO:0043697];cellular response to lipopolysaccharide [GO:0071222];cellular response to X-ray [GO:0071481];compound eye development [GO:0048749];defense response [GO:0006952];eye-antennal disc morphogenesis [GO:0007455];germ-line stem cell division [GO:0042078];germ-line stem cell population maintenance [GO:0030718];hemocyte prolif…	cytoplasmic side of apical plasma membrane [GO:0098592];cytosol [GO:0005829];nucleoplasm [GO:0005654];nucleus [GO:0005634]";"cytoplasm [GO:0005737]	DNA binding [GO:0003677];DNA-binding transcription factor activity [GO:0003700]";histone binding [GO:0042393];proximal promoter DNA-binding transcription activator activity, RNA polymerase II-specific [GO:0001077]";"cytokine receptor binding [GO:0005126];"DNA binding [GO:0003677]	1	0.00215883	91.265	67.293	81.972	0.35537	2868600000	2133800000	734790000	682	2.61384	0.0378253	2.61191	0.568696	1.5324	0.406934	0.716472	0.240016	0.0144483	0.00429296	4.87523	3.07415	0.564403	1.89845	0.402641	0.759233	0.235723	0.0144483
0.692437	NaN	NaN	-0.498475	NaN	-0.365983	0.451887	NaN	NaN	0.296545	0.319502	0.18409	NaN	NaN	0.520246	S	2	+	Calmodulin-dependent protein kinase II substrate motif;Casein kinase II substrate motif;Chk1 kinase substrate motif;G protein-coupled receptor kinase 1 substrate motif;Phosphorylase kinase substrate motif;PKA kinase substrate motif;PKC kinase substrate motif	tRNA methylation [GO:0030488]	tRNA (m1A) methyltransferase complex [GO:0031515]";"nucleus [GO:0005634]		0.999502	0.000137825	105.58	98.424	105.58	0.99049	132390000	82258000	50129000	31	2.61352	0.0376783	-4.34294e-08	0	-4.34294e-08	0	-4.34294e-08	0	-4.34294e-08	0	0	0	-0.425725	0	-1.12467	0	-0.24055	0
0.0931304	NaN	NaN	-0.293401	-0.467693	-0.31614	0.159405	NaN	-0.019536	0.223421	0.0860311	0.22556	0.313645	NaN	NaN	S	3	+	ERK1, ERK2, SAPK, CDK5 and GSK3 kinase substrate motif;ERK1,2 kinase substrate motif;G protein-coupled receptor kinase 1 substrate motif;Growth associated histone HI kinase substrate motif;GSK3 kinase substrate motif;GSK-3, ERK1, ERK2, CDK5 substrate motif;WW domain binding motif	positive regulation of apoptotic process [GO:0043065]";"mitochondrial outer membrane permeabilization [GO:0097345]	mitochondrial outer membrane [GO:0005741];nucleus [GO:0005634]";"integral component of membrane [GO:0016021]		0.999976	3.09392e-36	197	186.75	150.24	-0.5789	3731200000	2785900000	945270000	55	2.61251	0.0376623	-4.34294e-08	0	-4.34294e-08	0	-4.34294e-08	0	-4.34294e-08	0	0	0	0.085207	0	-0.452208	0	-0.0231957	0
0.0362476	0.0736296	0.0372193	0.220993	0.34019	0.136508	0.0337965	0.0513176	-0.022711	-0.0505683	0.000972766	-0.0170006	-0.0932579	-0.0310817	0.0563697	S	2	+	Casein kinase II substrate motif;ERK1,2 kinase substrate motif;Growth associated histone HI kinase substrate motif;GSK-3, ERK1, ERK2, CDK5 substrate motif;MAPKAPK2 kinase substrate motif;PKA kinase substrate motif;PKC kinase substrate motif;WW domain binding motif	regulation of DNA replication [GO:0006275]";"maintenance of mitotic sister chromatid cohesion [GO:0034088]	chromosome, centromeric region [GO:0000775];Ctf18 RFC-like complex [GO:0031390];nucleoplasm [GO:0005654]";"chromatin [GO:0000785]		0.999917	1.40861e-38	226.19	215.58	131.98	0.62123	90351000000	66991000000	23360000000	122	2.60961	0.0380603	0.00325822	0.000457951	1.59657	0.25522	0.373056	0.0434577	0.727682	0.0716888	2.70056	1.66466	-0.0712309	1.41614	0.183532	0.481039	-0.0282312	0.727682
-0.856206	-1.36889	-1.18216	-0.252084	-0.309033	-0.190761	-0.843789	-0.628659	-0.533806	NaN	-0.550275	NaN	-0.646225	-1.01861	-1.01244	S	2	+	14-3-3 domain binding motif;ATM kinase substrate motif;Calmodulin-dependent protein kinase II substrate motif;Casein kinase II substrate motif;DNA dependent Protein kinase substrate motif;PKA kinase substrate motif;PKC epsilon kinase substrate motif;PKC kinase substrate motif	negative regulation of autophagy [GO:0010507];negative regulation of macroautophagy [GO:0016242]";"juvenile hormone mediated signaling pathway [GO:0035626]	nucleus [GO:0005634]";"heterochromatin [GO:0000792]	juvenile hormone response element binding [GO:0070594];peptidyl-prolyl cis-trans isomerase activity [GO:0003755]";"FK506 binding [GO:0005528]	0.999987	3.6831e-10	177.04	128.44	166.11	0.44809	1626400000	1359800000	266560000	16	2.60391	0.0382232	-4.34294e-08	0	2.13267	0.641801	0.659887	0.223675	0.556204	-0.243327	3.34876	0	0.585478	2.34631	0.885128	1.24824	0.467002	0.556204
NaN	-0.676394	-0.774501	NaN	-0.556018	-0.43231	NaN	-0.192619	-0.115388	NaN	0.286837	0.128849	NaN	-0.28726	-0.542299	S	2	+	Casein kinase II substrate motif;G protein-coupled receptor kinase 1 substrate motif;GSK3 kinase substrate motif;PKA kinase substrate motif;PKC kinase substrate motif	negative regulation of proteasomal ubiquitin-dependent protein catabolic process [GO:0032435];positive regulation of canonical Wnt signaling pathway [GO:0090263];protein deubiquitination [GO:0016579];protein stabilization [GO:0050821];regulation of chromatin silencing [GO:0031935];regulation of protein stability [GO:0031647];ubiquitin-dependent protein catabolic process [GO:0006511]";"compound ey…	cytosol [GO:0005829];nucleus [GO:0005634]";"cytoplasm [GO:0005737]	thiol-dependent ubiquitin-specific protease activity [GO:0004843]";"cysteine-type endopeptidase activity [GO:0004197]	0.994828	3.3678e-16	162.81	150.07	162.81	0.81184	8718200000	7683900000	1034200000	147	2.60379	0.0380598	1.27218	0.622622	0.199442	-0.0793845	0.7225	0.260776	0.821475	-0.310668	3.0156	2.00961	0.933291	1.00248	0.231284	1.93087	0.571444	0.821475
-0.136115	-0.71635	-0.500742	0.945065	0.304044	1.22351	0.168121	0.23131	0.127039	0.428638	0.351078	0.144669	NaN	-0.247877	-0.30894	S	3	+	Casein kinase II substrate motif;PKA kinase substrate motif;PKC kinase substrate motif	antimicrobial humoral response [GO:0019730];cell adhesion [GO:0007155];defense response [GO:0006952];defense response to fungus [GO:0050832];defense response to Gram-positive bacterium [GO:0050830];defense response to oomycetes [GO:0002229];dorsal/ventral axis specification [GO:0009950];embryonic pattern specification [GO:0009880];heart development [GO:0007507];hemocyte proliferation [GO:0035172]…	cleavage furrow [GO:0032154];cytoplasm [GO:0005737];early endosome [GO:0005769];external side of plasma membrane [GO:0009897];integral component of plasma membrane [GO:0005887];plasma membrane [GO:0005886];protein-containing complex [GO:0032991]";"cell surface [GO:0009986];integral component of membrane [GO:0016021]	identical protein binding [GO:0042802];TIR domain binding [GO:0070976];transmembrane signaling receptor activity [GO:0004888]";"cytokine binding [GO:0019955]	1	1.86282e-24	169.51	165.98	150.95	0.38951	1018200000	709750000	308500000	871	2.60353	0.0379234	1.87079	0.586537	1.28376	1.10261	2.67495	0.453898	0.310298	-0.172661	6.1398	1.79578	0.759197	1.78438	1.27527	1.65914	0.626559	0.310298
0.00156073	-0.105814	-0.251991	0.518813	0.518587	0.401681	0.261721	0.117551	0.0270964	0.182014	0.111061	0.141362	0.18315	-0.213609	-0.288206	S	2	+	Casein kinase II substrate motif;CLK1,2 kinase substrate motif;G protein-coupled receptor kinase 1 substrate motif;PKA kinase substrate motif;PKC kinase substrate motif	negative regulation of transposition, DNA-mediated [GO:0000335];regulation of alternative mRNA splicing, via spliceosome [GO:0000381];RNA splicing [GO:0008380]";"mRNA splicing, via spliceosome [GO:0000398]	cytoplasm [GO:0005737];nucleoplasm [GO:0005654]";"ASAP complex [GO:0061574]	mRNA binding [GO:0003729]	1	2.68049e-06	136.62	133.7	113.05	0.30944	66688000000	47955000000	18733000000	194	2.60226	0.0379237	0.783927	0.251034	1.74497	0.585915	0.680369	0.241678	0.0256366	-0.0125265	3.2349	1.58581	0.26356	2.70361	0.598442	1.191	0.254204	0.0256366
0.00156073	-0.105814	-0.251991	0.518813	0.518587	0.401681	0.261721	0.117551	0.0270964	0.182014	0.111061	0.141362	0.18315	-0.213609	-0.288206	T	2	+	Growth associated histone HI kinase substrate motif;GSK-3, ERK1, ERK2, CDK5 substrate motif;MAPKAPK2 kinase substrate motif;WW domain binding motif	negative regulation of transposition, DNA-mediated [GO:0000335];regulation of alternative mRNA splicing, via spliceosome [GO:0000381];RNA splicing [GO:0008380]";"mRNA splicing, via spliceosome [GO:0000398]	cytoplasm [GO:0005737];nucleoplasm [GO:0005654]";"ASAP complex [GO:0061574]	mRNA binding [GO:0003729]	1	2.68049e-06	136.62	133.7	113.05	0.30944	66688000000	47955000000	18733000000	198	2.60226	0.0377637	0.783927	0.251034	1.74497	0.585915	0.680369	0.241678	0.0256366	-0.0125265	3.2349	1.58581	0.26356	2.70361	0.598442	1.191	0.254204	0.0256366
-0.603916	-0.959276	-0.902382	-0.215261	-0.255607	-0.21372	-0.306543	-0.138604	-0.282062	-0.541362	-0.263528	-0.303949	-0.484848	-0.199025	-0.113011	S	2	+	Calmodulin-dependent protein kinase II substrate motif;Casein kinase II substrate motif;Chk1 kinase substrate motif;ERK1,2 kinase substrate motif;GSK-3, ERK1, ERK2, CDK5 substrate motif;PKA kinase substrate motif;PKC kinase substrate motif;WW domain binding motif	SRP-dependent cotranslational protein targeting to membrane, translocation [GO:0006616]";"SRP-dependent cotranslational protein targeting to membrane, signal sequence recognition [GO:0006617]	signal recognition particle, endoplasmic reticulum targeting [GO:0005786]	7S RNA binding [GO:0008312]	0.999963	1.77359e-05	130.66	130.66	128.28	-0.40882	45878000000	35363000000	10515000000	12	2.60111	0.0376555	0.297255	-0.103985	0.120599	0.0374318	0.06523	0.0232247	1.61713	-0.55623	2.10022	1.49345	0.452245	2.22899	0.593662	2.04685	0.579455	1.61713
-0.357553	NaN	-0.345326	NaN	-0.171558	-0.170329	-0.331655	-0.0550966	-0.098406	NaN	0.034285	-0.241526	-0.650197	-0.787543	-0.689474	S	2	+	b-Adrenergic Receptor kinase substrate motif;Cdc2 kinase substrate motif;CDK kinase substrate motif;CDK1,2,4,6 kinase substrate motif;ERK1,2 kinase substrate motif;GSK-3, ERK1, ERK2, CDK5 substrate motif;PKA kinase substrate motif;PKC kinase substrate motif;WW domain binding motif	SRP-dependent cotranslational protein targeting to membrane [GO:0006614]	signal recognition particle, endoplasmic reticulum targeting [GO:0005786]	endoplasmic reticulum signal peptide binding [GO:0030942];signal recognition particle binding [GO:0005047]";"7S RNA binding [GO:0008312]	1	5.94386e-05	143.04	8.986	123.5	0.72973	4979500000	3725700000	1253800000	580	2.59656	0.0378996	1.86894	0.605451	2.69788	0.538128	2.34492	0.547352	2.17914	0.357631	9.09088	0.668655	0.247819	2.93674	0.180496	0.730832	0.189721	2.17914
0.102001	NaN	NaN	-0.293401	-0.467693	-0.31614	0.165117	NaN	-0.019536	0.223421	0.0860311	0.22556	0.339613	NaN	NaN	S	3	+	Casein kinase II substrate motif;ERK1,2 kinase substrate motif;GSK-3, ERK1, ERK2, CDK5 substrate motif;MAPKAPK2 kinase substrate motif;WW domain binding motif	positive regulation of apoptotic process [GO:0043065]";"mitochondrial outer membrane permeabilization [GO:0097345]	mitochondrial outer membrane [GO:0005741];nucleus [GO:0005634]";"integral component of membrane [GO:0016021]		1	3.09392e-36	197	186.75	197	0.65128	3792500000	2824400000	968100000	59	2.59372	0.0379083	-4.34294e-08	0	-4.34294e-08	0	-4.34294e-08	0	-4.34294e-08	0	0	0	0.0763369	0	-0.461078	0	-0.0292101	0
0.0697086	0.0223942	0.0661156	0.299001	0.283228	0.194581	0.0475012	0.0739826	0.0515106	-0.0847465	-0.043518	-0.0172422	0.0258963	0.264331	0.276971	T	3	+	b-Adrenergic Receptor kinase substrate motif	mRNA splicing, via spliceosome [GO:0000398];pole cell development [GO:0007277];pole plasm mRNA localization [GO:0019094];pole plasm oskar mRNA localization [GO:0045451]";"anterior/posterior pattern specification [GO:0009952]	cytoplasm [GO:0005737];cytosol [GO:0005829];precatalytic spliceosome [GO:0071011];ribonucleoprotein complex [GO:1990904]";"catalytic step 2 spliceosome [GO:0071013]		0.974495	1.40115e-54	244.21	232.21	215.28	0.13776	110020000000	77354000000	32668000000	325	2.58717	0.0382573	1.32399	-0.237568	0.326834	0.0698703	0.733628	-0.131401	0.754188	-0.136327	3.13864	1.81931	-0.101242	2.34248	0.206197	0.102389	0.00492533	0.754188
NaN	1.11849	1.36709	0.131194	NaN	0.328032	0.517427	0.642739	0.61711	NaN	0.455951	0.188528	NaN	NaN	1.48743	S	3	+	14-3-3 domain binding motif;Akt kinase substrate motif;Calmodulin-dependent protein kinase II substrate motif;Casein kinase II substrate motif;DNA dependent Protein kinase substrate motif;G protein-coupled receptor kinase 1 substrate motif;MAPKAPK1 kinase substrate motif;PKA kinase substrate motif;PKC kinase substrate motif;Pyruvate dehydrogenase kinase substrate motif	protein ubiquitination [GO:0016567];regulation of cell cycle [GO:0051726];SCF-dependent proteasomal ubiquitin-dependent protein catabolic process [GO:0031146]";"G2/M transition of mitotic cell cycle [GO:0000086]	nucleus [GO:0005634];SCF ubiquitin ligase complex [GO:0019005]";"cytosol [GO:0005829]		1	5.94619e-110	291.68	288.3	291.68	-1.3939	954150000	566360000	387790000	400	2.58592	0.0381736	-4.34294e-08	0	-4.34294e-08	0	-4.34294e-08	0	-4.34294e-08	0	0	1.43002	-0.920553	1.62667	-1.01318	2.07213	-0.650367	0
-0.246936	-0.53933	-0.612668	-0.0664709	-0.207115	-0.207517	-0.176625	-0.113654	-0.197262	-0.0745581	-0.0116658	-0.0649835	-0.103418	-0.0355333	0.0210226	S	2	+		mitochondrial transport [GO:0006839];mitochondrion organization [GO:0007005];phototransduction [GO:0007602];sperm individualization [GO:0007291];sperm mitochondrion organization [GO:0030382]";"ion transport [GO:0006811]	mitochondrion [GO:0005739];Nebenkern [GO:0016006];pore complex [GO:0046930]";"mitochondrial outer membrane [GO:0005741];mitochondrial outer membrane [GO:0005741]	voltage-gated anion channel activity [GO:0008308]";"porin activity [GO:0015288];voltage-gated anion channel activity [GO:0008308]	1	1.37728e-31	225.81	210.52	171.25	0.71437	5256700000	4021500000	1235200000	106	2.57977	0.0383868	0.096978	-0.0110929	0.958246	-0.121058	1.31463	-0.123204	1.65765	-0.427002	4.02749	1.66871	0.415909	1.18692	0.305944	1.24566	0.303798	1.65765
NaN	0.675394	0.6759	NaN	0.427664	0.399317	NaN	0.149199	0.215617	0.038998	-0.136048	0.0188387	NaN	0.422826	0.129506	T	2	+	Cdc2 kinase substrate motif;CDK1,2,4,6 kinase substrate motif;Growth associated histone HI kinase substrate motif;GSK-3, ERK1, ERK2, CDK5 substrate motif;MDC1 BRCT domain binding motif;PKA kinase substrate motif;PKC kinase substrate motif;Plk1 PBD domain binding motif;WW domain binding motif	DNA amplification [GO:0006277];DNA replication initiation [GO:0006270];mitotic cell cycle [GO:0000278];mitotic DNA replication checkpoint [GO:0033314]";"cell proliferation [GO:0008283]	nuclear origin of replication recognition complex [GO:0005664]";"nuclear chromosome, telomeric region [GO:0000784]	chromatin binding [GO:0003682];DNA replication origin binding [GO:0003688];metal ion binding [GO:0046872]";"ATP binding [GO:0005524]	0.950552	2.57181e-07	161.08	146.81	123.4	0.42564	946970000	598680000	348290000	463	2.56851	0.038959	0.984804	-0.302237	0.347054	0.137324	0.22433	-0.0937582	0.948883	0.399481	2.50507	2.65011	-0.701718	2.53595	-0.262157	2.34653	-0.493239	0.948883
-0.259245	-0.58588	-0.613516	0.0854849	-0.0637307	0.00619029	0.0753702	-0.0847819	-0.1634	-0.0790589	-0.0348313	-0.151332	-0.187634	-0.254136	-0.344762	S	2	+	Calmodulin-dependent protein kinase II substrate motif;Chk1 kinase substrate motif;ERK1,2 kinase substrate motif;GSK-3, ERK1, ERK2, CDK5 substrate motif;PKA kinase substrate motif;PKC kinase substrate motif;WW domain binding motif	cellular aldehyde metabolic process [GO:0006081]	integral component of membrane [GO:0016021]	aldehyde dehydrogenase [NAD(P)+] activity [GO:0004030]";"3-chloroallyl aldehyde dehydrogenase activity [GO:0004028];aldehyde dehydrogenase [NAD(P)+] activity [GO:0004030];oxidoreductase activity, acting on the aldehyde or oxo group of donors, NAD or NADP as acceptor [GO:0016620]	1	3.55985e-06	161.51	96.355	118.23	-0.10959	2274100000	1709500000	564630000	434	2.56629	0.0389306	1.42381	0.17377	1.90832	0.271493	1.14912	0.204574	0.849209	-0.224036	5.33045	1.54439	0.397806	1.81864	0.495528	1.48509	0.42861	0.849209
NaN	0.0277203	0.402505	NaN	-0.0423093	-0.0554263	-0.180397	0.0690962	0.0753091	NaN	-0.174071	-0.163348	NaN	0.955911	0.74977	S	3	+	14-3-3 domain binding motif;Calmodulin-dependent protein kinase II substrate motif;Calmodulin-dependent protein kinase IV substrate motif;ERK1,2 kinase substrate motif;GSK-3, ERK1, ERK2, CDK5 substrate motif;MAPKAPK2 kinase substrate motif;PKA kinase substrate motif;PKC kinase substrate motif;WW domain binding motif	transcription by RNA polymerase II [GO:0006366];transcription initiation from RNA polymerase II promoter [GO:0006367]";"regulation of transcription by RNA polymerase II [GO:0006357];regulation of transcription by RNA polymerase II [GO:0006357]	nucleus [GO:0005634]";"mediator complex [GO:0016592];mediator complex [GO:0016592]	transcription coregulator activity [GO:0003712]	1	1.2833e-70	277.76	270.72	229.59	-0.19644	2016400000	1347100000	669330000	811	2.56616	0.0387805	1.99766	-1.02155	1.89055	-0.901708	2.13037	-0.864838	1.01562	-0.637728	7.03421	0.751525	-0.383822	0.530927	-0.263981	0.538195	-0.22711	1.01562
-0.219389	-0.486555	-0.425986	-0.102434	-0.658289	-0.282152	-0.186716	-0.105294	-0.291371	-0.271356	-0.243935	-0.252251	0.104605	0.70349	0.636272	S	2	+	Casein kinase II substrate motif;ERK1,2 kinase substrate motif;G protein-coupled receptor kinase 1 substrate motif;GSK-3, ERK1, ERK2, CDK5 substrate motif;PKA kinase substrate motif;PKC kinase substrate motif;WW domain binding motif	compound eye development [GO:0048749];wing disc development [GO:0035220]";"chaeta development [GO:0022416]	nucleus [GO:0005634]		1	8.92433e-72	262.57	247.16	146.9	0.88381	19069000000	15123000000	3946100000	395	2.56586	0.0387368	1.75182	-0.737303	1.52833	-0.82908	1.57708	-0.675916	1.85273	-0.858765	6.70996	0.679051	0.121463	0.0561241	0.0296851	0.876164	0.18285	1.85273
NaN	1.41878	0.922087	NaN	1.27799	1.08187	NaN	1.18365	0.908352	NaN	0.519051	0.399733	NaN	-0.278371	-0.590214	S	2	+	DNA dependent Protein kinase substrate motif;ERK1,2 kinase substrate motif;Growth associated histone HI kinase substrate motif;GSK-3, ERK1, ERK2, CDK5 substrate motif;PKA kinase substrate motif;PKC kinase substrate motif;WW domain binding motif	learning [GO:0007612];mushroom body development [GO:0016319];olfactory learning [GO:0008355];ribosomal small subunit biogenesis [GO:0042274];visual behavior [GO:0007632]";"adult walking behavior [GO:0007628]	nucleolus [GO:0005730];nucleus [GO:0005634]";"cytoplasm [GO:0005737]	zinc ion binding [GO:0008270]";"nucleic acid binding [GO:0003676]	1	0.00243927	89.171	75.523	81.017	0.33108	302110000	171130000	130970000	258	2.56383	0.0386855	1.47926	0.893685	1.89376	1.61422	1.71726	1.48029	1.49748	1.60473	6.58776	0.964795	-0.711043	0.0110568	0.0094952	0.152426	-0.124436	1.49748
0.112929	0.238701	0.257002	-0.631195	-0.31487	-0.331504	-0.700303	-0.775949	-0.489663	-0.516978	-0.213714	-0.401812	-0.561053	-0.00851521	-0.0583014	S	4	+	Casein kinase II substrate motif;G protein-coupled receptor kinase 1 substrate motif	nucleolus organization [GO:0007000]";"multicellular organism development [GO:0007275]	nucleus [GO:0005634];spindle [GO:0005819]";"nucleolus [GO:0005730]		0.999977	5.23324e-234	423.67	400.37	315.49	-1.0129	149740000000	118640000000	31095000000	233	2.56365	0.0385301	0.354502	-0.168212	0.457525	-0.216566	1.06869	-0.446015	1.06321	0.412168	2.94393	2.36908	-0.580379	2.30114	-0.628734	3.04716	-0.858183	1.06321
-0.34672	-0.459851	-0.435832	NaN	-0.303152	-0.258939	-0.0726278	-0.340982	-0.2218	NaN	-0.0219362	-0.0340865	-0.722206	-0.540681	-0.4591	S	2	+	Cdc2 kinase substrate motif;CDK kinase substrate motif;CDK1,2,4,6 kinase substrate motif;ERK1,2 kinase substrate motif;G protein-coupled receptor kinase 1 substrate motif;GSK3 kinase substrate motif;GSK-3, ERK1, ERK2, CDK5 substrate motif;PKA kinase substrate motif;WW domain binding motif	mesodermal cell fate commitment [GO:0001710];positive regulation of fibroblast growth factor receptor signaling pathway [GO:0045743];trachea development [GO:0060438];UDP-N-acetylglucosamine biosynthetic process [GO:0006048]";"carbohydrate metabolic process [GO:0005975]		phosphoacetylglucosamine mutase activity [GO:0004610]";"magnesium ion binding [GO:0000287]	1	1.71272e-06	149.82	116.92	149.57	0.058313	603560000	444180000	159370000	264	2.56199	0.038512	1.91233	0.545984	1.19694	0.29295	1.52239	0.362192	0.875234	0.159861	5.50689	2.48756	0.386123	1.17157	0.13309	1.12056	0.202331	0.875234
NaN	-0.290057	-0.545929	NaN	-0.182148	-0.322722	-0.0187757	0.18574	0.216734	-0.335983	-0.340112	-0.38879	NaN	-0.362021	-0.396745	S	2	+	Casein kinase I substrate motif;Casein kinase II substrate motif;ERK1,2 kinase substrate motif;GSK-3, ERK1, ERK2, CDK5 substrate motif;PKA kinase substrate motif;WW domain binding motif	larval lymph gland hemopoiesis [GO:0035167]";"dosage compensation [GO:0007549]	nucleus [GO:0005634]	DNA-binding transcription factor activity [GO:0003700]	0.999792	6.22133e-05	132.62	100.01	128.33	0.56666	993790000	685060000	308730000	905	2.5604	0.038494	0.389641	0.0244215	0.654392	0.126948	1.87563	0.507282	0.100664	-0.0386099	3.02032	0.247729	0.0630314	0.426707	0.165558	1.56614	0.545892	0.100664
-0.381576	-0.445306	-0.48474	0.177568	-0.163797	-0.250554	0.114127	0.282539	-0.159813	0.327586	0.201993	0.398029	0.0341297	-0.213762	-0.155402	S	2	+	Casein kinase I substrate motif;Casein kinase II substrate motif	mRNA splicing, via spliceosome [GO:0000398];regulation of alternative mRNA splicing, via spliceosome [GO:0000381];spermatogenesis [GO:0007283]";"mitotic cell cycle [GO:0000278]	nucleus [GO:0005634];precatalytic spliceosome [GO:0071011];U2 snRNP [GO:0005686];U2-type prespliceosome [GO:0071004]";"catalytic step 2 spliceosome [GO:0071013]	RNA binding [GO:0003723]	1	7.63459e-116	315.06	289.58	288.19	0.31759	42438000000	29131000000	13307000000	371	2.55475	0.0387778	1.95396	0.420881	0.0765162	0.0327506	0.568547	0.190629	1.8057	-0.325529	4.40472	3.49074	0.74641	1.25426	0.35828	1.75582	0.516158	1.8057
0.214816	0.66939	NaN	0.308204	0.529871	0.641685	0.374733	0.426354	0.369855	-0.0891957	-0.0390782	0.00561536	NaN	0.738119	0.840765	S	3	+	b-Adrenergic Receptor kinase substrate motif;Casein kinase II substrate motif;G protein-coupled receptor kinase 1 substrate motif	imaginal disc development [GO:0007444];larval development [GO:0002164];oogenesis [GO:0048477];ribosomal large subunit assembly [GO:0000027]";"female gamete generation [GO:0007292]	preribosome, large subunit precursor [GO:0030687]	rRNA binding [GO:0019843]	1	2.86237e-72	268.27	254.66	170.29	3.0725	3454700000	2472900000	981850000	239	2.55417	0.0386482	3.27017	-0.830328	0.955246	-0.296189	2.52512	-0.399128	0.561404	-0.347339	7.31195	1.16515	-0.482989	0.0838433	0.0511502	0.106907	-0.0517887	0.561404
0.0102069	-0.161009	-0.367918	-0.676957	-0.356643	-0.170938	-0.874276	-0.956391	-0.87177	-1.22379	-0.763815	-0.870478	NaN	-0.764162	-0.771421	S	2	+	PKA kinase substrate motif			ATP binding [GO:0005524]";"ATPase activity [GO:0016887]	1	5.2681e-37	200.06	193.19	200.06	0.11478	3911400000	3302400000	609010000	102	2.5513	0.038748	0.421736	-0.184902	0.821885	0.366279	1.4638	-0.133021	1.61245	0.594885	4.31987	1.9354	-0.779787	0.550445	-0.228606	2.52748	-0.727905	1.61245
-0.18622	0.0852344	-0.00980778	0.283728	0.57918	0.530049	-0.154015	-0.0361655	-0.177714	-0.514294	-0.0646214	-0.121094	-0.438099	-0.149926	-0.0866414	S	2	+	Casein kinase I substrate motif	mRNA transport [GO:0051028];NLS-bearing protein import into nucleus [GO:0006607];positive regulation of cell proliferation [GO:0008284];positive regulation of gene expression [GO:0010628];positive regulation of GTPase activity [GO:0043547];positive regulation of protein localization to nucleus [GO:1900182];positive regulation of RNA export from nucleus [GO:0046833];protein import into nucleus [GO…	cytoplasm [GO:0005737];nuclear pore [GO:0005643];nucleus [GO:0005634]";"centrosome [GO:0005813]	Ran GTPase binding [GO:0008536];transferase activity [GO:0016740]";"metal ion binding [GO:0046872]	1	5.85061e-150	344.58	336.72	111.5	3.5299	49418000000	36219000000	13199000000	2694	2.54927	0.0387216	0.0157287	-0.00844753	2.08421	0.689208	0.366233	0.102257	0.630629	0.187958	3.0968	0.533555	-0.196405	1.84136	0.50125	0.399476	-0.0857	0.630629
0.0116222	-0.228465	-0.25269	0.270155	0.182832	0.202831	0.183801	0.162954	0.116962	-0.0946135	-0.10697	-0.0304077	-0.0448396	0.127861	0.21701	S	2	+	ERK1,2 kinase substrate motif;G protein-coupled receptor kinase 1 substrate motif;GSK3 kinase substrate motif;GSK-3, ERK1, ERK2, CDK5 substrate motif;PKA kinase substrate motif;PKC kinase substrate motif;WW domain binding motif		nucleus [GO:0005634]		1	4.10495e-07	116.06	81.288	116.06	-0.017215	10148000000	7351300000	2797100000	760	2.54493	0.0389219	1.03537	-0.177341	0.661007	0.118596	0.276113	0.0545622	1.05621	-0.256521	3.02869	0.379528	0.0791805	1.8786	0.375117	1.63925	0.311083	1.05621
NaN	0.48442	0.734107	NaN	-0.00309374	0.106151	0.237854	0.091994	0.176265	NaN	-0.218851	-0.132749	NaN	1.09842	NaN	S	2	+	14-3-3 domain binding motif;Calmodulin-dependent protein kinase II substrate motif;Calmodulin-dependent protein kinase IV substrate motif;Chk1 kinase substrate motif;G protein-coupled receptor kinase 1 substrate motif;GSK3 kinase substrate motif;MAPKAPK2 kinase substrate motif;MDC1 BRCT domain binding motif;PKA kinase substrate motif;PKC kinase substrate motif;Plk1 PBD domain binding motif	axon guidance [GO:0007411];blastoderm segmentation [GO:0007350];chromatin remodeling [GO:0006338];determination of adult lifespan [GO:0008340];DNA repair [GO:0006281];imaginal disc-derived wing morphogenesis [GO:0007476];locomotion [GO:0040011];negative regulation of transcription by RNA polymerase II [GO:0000122];negative regulation of transcription, DNA-templated [GO:0045892];neuron remodeling …	nucleus [GO:0005634]";"nucleoplasm [GO:0005654]	DNA-dependent ATPase activity [GO:0008094]";"ATP binding [GO:0005524];"ATP-dependent DNA helicase activity [GO:0004003]	0.998573	0.00037425	110.46	90.68	110.46	-0.48135	1197600000	780070000	417500000	4213	2.5412	0.0391984	-4.34294e-08	0	-4.34294e-08	0	-4.34294e-08	0	-4.34294e-08	0	0	1.56625	-0.785063	1.26096	-0.557735	1.57636	-0.440559	0
NaN	0.133873	0.0451026	NaN	-0.29297	-0.125263	NaN	-0.230949	-0.180446	NaN	-0.150306	-0.146634	NaN	0.212854	0.249363	S	2	+	ERK1,2 kinase substrate motif;GSK-3, ERK1, ERK2, CDK5 substrate motif;WW domain binding motif	negative regulation of innate immune response [GO:0045824];negative regulation of Toll signaling pathway [GO:0045751];positive regulation of cell growth [GO:0030307];post-translational protein modification [GO:0043687];protein deubiquitination [GO:0016579];regulation of antimicrobial peptide production [GO:0002784];regulation of gene silencing [GO:0060968];regulation of protein stability [GO:0031…	nucleus [GO:0005634]	thiol-dependent ubiquitin-specific protease activity [GO:0004843]";"cysteine-type endopeptidase activity [GO:0004197];thiol-dependent ubiquitin-specific protease activity [GO:0004843]	0.999935	3.55177e-37	211.64	202.16	211.64	-0.9042	2623300000	1847900000	775400000	3333	2.53876	0.0392946	2.63301	-0.379579	1.44413	-0.440225	2.29672	-0.436806	1.00784	-0.141621	7.3817	1.47979	-0.237958	1.05624	-0.298604	1.54292	-0.295185	1.00784
NaN	NaN	NaN	NaN	0.927466	0.910272	0.495593	0.365649	0.641176	NaN	0.0524158	0.241416	NaN	1.24513	1.70057	S	2	+	Casein kinase II substrate motif;DNA dependent Protein kinase substrate motif;Pyruvate dehydrogenase kinase substrate motif	regulation of GTPase activity [GO:0043087]";"border follicle cell migration [GO:0007298]		GTPase activator activity [GO:0005096]	0.85459	0.000142613	105.14	88.224	86.497	-0.80616	457420000	281640000	175780000	472	2.53658	0.0392741	1.48307	-1.32594	0.867665	-0.553983	1.78851	-0.972046	-4.34294e-08	0	4.13925	0	NaN	0	NaN	0	NaN	0
0.376597	0.896099	0.647361	0.277591	0.161797	0.119714	0.235053	-0.0210569	-0.0294705	0.0241982	-0.00958194	0.0368486	NaN	1.47674	0.707907	S	2	+	b-Adrenergic Receptor kinase substrate motif;Casein kinase I substrate motif;Cdc2 kinase substrate motif;CDK kinase substrate motif;CDK1,2,4,6 kinase substrate motif;ERK1,2 kinase substrate motif;GSK-3, ERK1, ERK2, CDK5 substrate motif;WW domain binding motif				1	9.44006e-89	299.94	287.89	166.05	-0.33322	6273500000	4395700000	1877800000	128	2.52452	0.04	1.4785	-1.07517	1.27082	-0.905958	1.35611	-1.03082	0.549572	-0.452307	4.65501	1.8404	-0.622864	1.3487	-0.453651	1.5392	-0.57851	0.549572
0.0702919	0.607836	0.78977	0.450772	0.724271	0.621722	0.419404	0.426693	0.408002	0.4209	0.262235	0.331856	NaN	1.5514	1.22198	S	2	+	Casein kinase II substrate motif	centripetally migrating follicle cell migration [GO:0060269];chromosome organization [GO:0051276];dorsal appendage formation [GO:0046843];dorsal/ventral axis specification, ovarian follicular epithelium [GO:0008069];intracellular mRNA localization [GO:0008298];long-term memory [GO:0007616];maternal determination of dorsal/ventral axis, ovarian follicular epithelium, germ-line encoded [GO:0008070]…	integral component of membrane [GO:0016021];mitochondrial outer membrane [GO:0005741];mitochondrion [GO:0005739]";"Golgi apparatus [GO:0005794]	RNA binding [GO:0003723]";"protein kinase A regulatory subunit binding [GO:0034237]	1	3.73784e-121	320.66	294.24	203.96	-1.288	4070100000	2587600000	1482500000	269	2.51916	0.0403755	2.34013	-1.04836	1.79259	-0.78777	2.37032	-0.968659	1.22009	-0.897393	7.72314	0.274319	-0.150969	0.181222	0.109622	0.120296	-0.0712666	1.22009
0.0901956	0.484623	0.17912	-0.0394238	-0.155383	-0.20389	-0.158583	-0.236016	-0.264028	-0.112149	-0.0256815	-0.0767998	-0.0849745	-0.00906745	-0.0336738	S	3	+	b-Adrenergic Receptor kinase substrate motif;Casein kinase II substrate motif;PKA kinase substrate motif;PKC kinase substrate motif	cellular response to ethanol [GO:0071361];circadian rhythm [GO:0007623];germ cell development [GO:0007281];negative regulation of Ras protein signal transduction [GO:0046580];positive regulation of Notch signaling pathway [GO:0045747];positive regulation of protein localization to membrane [GO:1905477];regulation of actin cytoskeleton organization [GO:0032956];regulation of actin cytoskeleton reo…	cytoskeleton [GO:0005856];cytosol [GO:0005829];plasma membrane [GO:0005886]";"cytoplasm [GO:0005737]	kinase activity [GO:0016301];Notch binding [GO:0005112];protein kinase A regulatory subunit binding [GO:0034237]";"actin filament binding [GO:0051015];kinase activity [GO:0016301]	1	2.68988e-236	404.26	399.82	294.81	0.052552	312290000000	243710000000	68588000000	117	2.51816	0.0402748	0.359165	-0.0289715	0.775571	-0.0903269	1.99144	-0.17697	1.13733	0.293885	4.26351	1.24208	-0.322856	1.38904	-0.384212	1.72314	-0.470855	1.13733
0.107516	0.227495	0.102053	-0.0698638	-0.0967457	-0.409412	-0.0362966	-0.247812	-0.315038	-0.048142	-0.13451	-0.121003	NaN	0.34301	0.307662	S	2	+	Casein kinase II substrate motif;PKA kinase substrate motif;Pyruvate dehydrogenase kinase substrate motif	positive regulation of cell adhesion [GO:0045785]	WASH complex [GO:0071203]		1	3.16458e-150	350.15	344.57	261.28	-0.14921	3846500000	2817400000	1029100000	1408	2.51475	0.0403422	2.85177	-0.426554	1.45325	-0.517343	1.76608	-0.525051	1.3393	-0.179648	7.41039	2.13932	-0.246906	1.35575	-0.337695	1.68007	-0.345404	1.3393
-0.654662	-0.841627	-0.657536	-0.437999	-0.25865	-0.289889	-0.705951	-0.355432	-0.115913	-0.017915	0.138432	0.460891	-0.418256	-0.944203	-0.651689	S	3	+	Casein kinase II substrate motif;DNA dependent Protein kinase substrate motif;ERK1,2 kinase substrate motif;G protein-coupled receptor kinase 1 substrate motif;Growth associated histone HI kinase substrate motif;GSK-3, ERK1, ERK2, CDK5 substrate motif;PKA kinase substrate motif;PKC kinase substrate motif;WW domain binding motif	histone H2B conserved C-terminal lysine deubiquitination [GO:0035616];negative regulation of defense response to bacterium [GO:1900425];negative regulation of innate immune response [GO:0045824];negative regulation of macroautophagy [GO:0016242];positive regulation of chromatin silencing [GO:0031937];positive regulation of stem cell population maintenance [GO:1902459];protein deubiquitination [GO…	nucleolus [GO:0005730];nucleoplasm [GO:0005654];nucleus [GO:0005634]";"cytoplasm [GO:0005737]	thiol-dependent ubiquitin-specific protease activity [GO:0004843];thiol-dependent ubiquitinyl hydrolase activity [GO:0036459]";"cysteine-type endopeptidase activity [GO:0004197]	1	1.30016e-14	170.27	148.33	83.059	-0.045975	21041000000	15616000000	5425700000	779	2.50676	0.0409015	1.85337	0.865185	0.99218	0.342537	0.537067	0.27895	0.101895	-0.0465592	3.48452	2.39032	0.911744	2.02765	0.389096	0.828375	0.32551	0.101895
-0.271779	NaN	-0.201029	-0.0432241	-0.214106	-0.0328314	-0.478999	-0.331368	-0.342899	-0.611032	-0.266683	-0.299563	-0.00490226	0.388883	0.313362	S	2	+	Casein kinase II substrate motif;Pyruvate dehydrogenase kinase substrate motif	regulation of mRNA export from nucleus [GO:0010793];regulation of mRNA processing [GO:0050684]";"regulation of histone H3-K36 trimethylation [GO:2001253]	nucleus [GO:0005634]		1	8.28563e-34	204.13	195.38	111.63	-1.9559	1440100000	1057700000	382420000	739	2.50534	0.0408151	1.73066	-0.624873	1.15336	-0.329168	2.04983	-0.616869	1.22782	-0.468851	6.16168	0.445981	-0.156022	0.743736	0.139683	0.947246	-0.148018	1.22782
-0.0344099	0.540056	0.462592	0.825241	0.335688	0.110399	0.66879	-0.276913	0.144613	0.00737636	-0.0311702	0.208725	NaN	1.81386	1.61237	S	3	+	b-Adrenergic Receptor kinase substrate motif;Casein kinase I substrate motif;Casein kinase II substrate motif;Pyruvate dehydrogenase kinase substrate motif	cilium assembly [GO:0060271];mitotic cytokinesis [GO:0000281];positive regulation of apoptotic process [GO:0043065];septin ring assembly [GO:0000921]";"cellularization [GO:0007349]	septin complex [GO:0031105];septin filament array [GO:0032160];septin ring [GO:0005940]";"microtubule cytoskeleton [GO:0015630]	GTP binding [GO:0005525];protein homodimerization activity [GO:0042803];protein-containing complex scaffold activity [GO:0032947];ubiquitin protein ligase binding [GO:0031625]";"GTPase activity [GO:0003924]	1	2.17665e-21	164.69	161.97	140.59	0.94687	6754600000	4756200000	1998400000	216	2.50515	0.0406617	3.06063	-1.65147	1.70469	-1.28934	1.62206	-1.53428	1.96904	-1.39037	8.35641	0.600214	-0.261102	0.134256	0.10103	0.165591	-0.143916	1.96904
NaN	1.09065	1.16281	NaN	NaN	1.15995	NaN	1.82906	1.41092	NaN	0.537643	0.504773	NaN	1.8805	1.8506	S	2	+	14-3-3 domain binding motif;Calmodulin-dependent protein kinase II substrate motif;Casein kinase II substrate motif;G protein-coupled receptor kinase 1 substrate motif;PKA kinase substrate motif;PKC kinase substrate motif	eggshell chorion assembly [GO:0007306]";"chorion-containing eggshell formation [GO:0007304];chorion-containing eggshell formation [GO:0007304]	extracellular region [GO:0005576]";"chorion [GO:0042600]	structural constituent of chorion [GO:0005213]	1	0.00024314	119.53	102.06	58.955	3.3544	1211000000	585790000	625240000	487	2.5022	0.040794	3.56378	-1.34434	-4.34294e-08	0	0.441214	-0.24556	2.55558	-0.738822	6.56057	2.37065	-0.60552	0	0.0332236	0.836701	0.493262	2.55558
0.579094	1.8195	1.66214	-0.588226	-0.949055	-0.5462	0.202189	-0.223947	0.90047	-0.500533	0.101465	-0.676273	-0.302742	0.347684	-0.182896	T	3	+	b-Adrenergic Receptor kinase substrate motif;Cdc2 kinase substrate motif;CDK1,2,4,6 kinase substrate motif;CDK5 kinase substrate motif;G protein-coupled receptor kinase 1 substrate motif;Growth associated histone HI kinase substrate motif;GSK-3, ERK1, ERK2, CDK5 substrate motif;PKA kinase substrate motif;PKC kinase substrate motif;WW domain binding motif	ribosome biogenesis [GO:0042254]";"positive regulation of telomerase activity [GO:0051973]	nucleus [GO:0005634]	ATP binding [GO:0005524];preribosome binding [GO:1990275]";"ATPase activity [GO:0016887]	1	6.95129e-51	262.59	241.74	122.96	-0.65999	6205900000	4275400000	1930400000	515	2.4964	0.0411194	0.433066	-0.312462	1.28185	-0.648509	0.369371	0.338889	1.48046	1.39956	3.56475	1.70337	-1.71203	2.12283	-2.04807	0.975785	-1.06068	1.48046
0.342768	0.686182	0.87699	-0.0141306	0.114994	0.233864	-0.0885774	-0.409676	-0.0462986	-0.0412239	-0.875889	-0.958807	0.1167	0.481316	0.419371	S	2	+	Casein kinase II substrate motif;ERK1,2 kinase substrate motif;GSK-3, ERK1, ERK2, CDK5 substrate motif;WW domain binding motif	cleavage furrow formation [GO:0036089];cleavage furrow ingression [GO:0036090];germ cell migration [GO:0008354];membrane organization [GO:0061024];protein localization [GO:0008104]";"cellularization [GO:0007349]	cleavage furrow [GO:0032154]";"cellularization cleavage furrow invagination front [GO:0110071]		1	4.32796e-101	324.45	298.63	184.68	-1.6013	13665000000	9841100000	3823700000	228	2.49473	0.0410855	1.42929	-0.964436	0.786657	-0.227553	1.49855	-0.520646	0.701088	0.296184	4.41558	1.71735	-1.26062	1.41834	-0.523737	1.86791	-0.81683	0.701088
-0.219668	-0.627106	-0.906103	0.318902	0.246446	0.147132	0.10213	-0.0974189	-0.205625	0.00138007	-0.0459679	-0.067105	-0.111211	-0.263471	-0.101772	S	2	+	ERK1,2 kinase substrate motif;Growth associated histone HI kinase substrate motif;GSK-3, ERK1, ERK2, CDK5 substrate motif;PKA kinase substrate motif;PKC kinase substrate motif;WW domain binding motif	positive regulation of malate dehydrogenase (decarboxylating) (NADP+) activity [GO:1903220];RNA 3'-end processing [GO:0031123]";"mRNA processing [GO:0006397]	nucleus [GO:0005634]";"mRNA cleavage stimulating factor complex [GO:0005848]	mRNA binding [GO:0003729]	1	2.94102e-24	192.28	161.42	192.01	-1.5256	31048000000	23190000000	7857500000	695	2.48961	0.041437	1.01592	0.121587	2.26859	0.396311	0.368456	0.0918467	0.967018	-0.425474	4.61999	1.28064	0.547061	1.79245	0.821785	1.11214	0.517321	0.967018
0.098646	0.123886	0.0572426	0.10665	0.393242	-0.00196048	-0.0965877	-0.0789181	-0.209097	0.37718	0.187045	0.353984	-0.245317	-0.0435215	-0.339274	S	3	+	Cdc2 kinase substrate motif;CDK kinase substrate motif;CDK1,2,4,6 kinase substrate motif;ERK1,2 kinase substrate motif;Growth associated histone HI kinase substrate motif;GSK-3, ERK1, ERK2, CDK5 substrate motif;PKA kinase substrate motif;PKC kinase substrate motif;WW domain binding motif	proteolysis [GO:0006508]";"protein homooligomerization [GO:0051260]	mitochondrion [GO:0005739]";"cytoplasm [GO:0005737]	exopeptidase activity [GO:0008238];identical protein binding [GO:0042802];serine-type endopeptidase activity [GO:0004252];tripeptidyl-peptidase activity [GO:0008240]";"aminopeptidase activity [GO:0004177];"serine-type endopeptidase activity [GO:0004252];serine-type endopeptidase activity [GO:0004252]	0.997347	7.1698e-161	326.31	326.31	189.72	-0.12109	143040000000	117090000000	25949000000	1182	2.48931	0.0413432	2.08538	0.51544	1.20289	0.375348	0.349928	0.0811696	1.55847	0.302629	5.19667	1.55623	0.212811	0.239876	0.0727188	2.09573	-0.221459	1.55847
-0.0917769	-0.117817	-0.18681	0.695271	0.210263	0.217056	0.0670692	-0.419666	-0.6015	-0.408041	-0.90261	-0.8881	-0.312	-0.250364	-0.119029	S	2	+	Casein kinase II substrate motif;G protein-coupled receptor kinase 1 substrate motif;MAPKAPK2 kinase substrate motif;PAK2 kinase substrate motif;PKA kinase substrate motif;PKC kinase substrate motif	chromatin silencing at centromere [GO:0030702];chromosome organization [GO:0051276];establishment of chromatin silencing [GO:0006343];gene silencing [GO:0016458];heterochromatin assembly [GO:0031507];histone H4-K20 trimethylation [GO:0034773];mitotic cell cycle [GO:0000278];negative regulation of transcription, DNA-templated [GO:0045892];positive regulation of extent of heterochromatin assembly […	chromosome, centromeric region [GO:0000775];chromosome, telomeric region [GO:0000781];condensed chromosome [GO:0000793];condensed nuclear chromosome, centromeric region [GO:0000780];euchromatin [GO:0000791];heterochromatin [GO:0000792];nuclear heterochromatin [GO:0005720];nucleoplasm [GO:0005654];nucleus [GO:0005634];pericentric heterochromatin [GO:0005721];polytene chromosome [GO:0005700];polyte…	histone binding [GO:0042393];Hsp70 protein binding [GO:0030544];methylated histone binding [GO:0035064];mRNA binding [GO:0003729];protein binding, bridging [GO:0030674];protein-containing complex binding [GO:0044877];rDNA binding [GO:0000182];RNA binding [GO:0003723];RNA polymerase binding [GO:0070063];RNA polymerase II C-terminal domain binding [GO:0099122];satellite DNA binding [GO:0003696]";"c…	1	1.81224e-64	300.35	244.82	166.62	-0.099809	71976000000	56688000000	15288000000	113	2.47966	0.041875	1.37177	-0.505786	1.61574	0.601328	0.164949	-0.0909011	0.678969	0.0949966	3.83143	1.65915	-0.600782	1.44343	0.506331	0.388686	-0.185898	0.678969
-0.700917	-0.943513	-1.04949	-0.172465	-0.635015	-0.426687	-0.326135	-0.456004	-0.392204	0.0619294	-0.198931	-0.272845	-0.42016	-0.448993	-0.179295	S	3	+	b-Adrenergic Receptor kinase substrate motif;Casein kinase I substrate motif;Casein kinase II substrate motif;G protein-coupled receptor kinase 1 substrate motif;MAPKAPK2 kinase substrate motif	mitotic DNA replication checkpoint [GO:0033314]	nucleus [GO:0005634]		1	2.02271e-76	278.27	262.61	102.49	0.11911	11373000000	8991100000	2381700000	354	2.47888	0.0417802	0.735031	0.212867	0.144831	-0.0619063	0.169827	-0.0419648	1.82586	-0.548489	2.87555	2.20371	0.761356	1.34696	0.486583	2.00339	0.506524	1.82586
NaN	-0.656655	-0.682236	NaN	0.411558	0.0232725	NaN	-0.196401	-0.223845	NaN	-0.0231045	0.118124	NaN	-0.662257	-0.805085	S	2	+	14-3-3 domain binding motif;Akt kinase substrate motif;AMP-activated protein kinase 2 substrate motif;b-Adrenergic Receptor kinase substrate motif;Calmodulin-dependent protein kinase II substrate motif;Casein kinase II substrate motif;Cdc2 kinase substrate motif;CDK kinase substrate motif;CDK1,2,4,6 kinase substrate motif;CLK1 kinase substrate motif;ERK1,2 kinase substrate motif;GSK-3, ERK1, ERK2…	protein refolding [GO:0042026]";"mRNA splicing, via spliceosome [GO:0000398]	cytosol [GO:0005829];nucleoplasm [GO:0005654];nucleus [GO:0005634];precatalytic spliceosome [GO:0071011]";"catalytic step 2 spliceosome [GO:0071013]	unfolded protein binding [GO:0051082]";"peptidyl-prolyl cis-trans isomerase activity [GO:0003755]	1	0.00012713	130.09	83.039	36.954	-0.22971	4849400000	3448400000	1401000000	758	2.47853	0.0416423	1.79238	0.781181	1.35464	0.951087	1.72695	0.523548	0.328448	0.0642255	5.20242	2.00565	0.716956	1.34764	0.886861	2.77891	0.459323	0.328448
-0.388655	-0.400858	-0.280842	-0.0599531	-0.193001	-0.218278	-0.389468	-0.485795	-0.319542	-0.227202	-0.0197341	0.00704905	-0.158262	-0.17336	-0.147905	S	2	+	b-Adrenergic Receptor kinase substrate motif;Casein kinase II substrate motif;ERK1,2 kinase substrate motif;GSK-3, ERK1, ERK2, CDK5 substrate motif;MAPKAPK2 kinase substrate motif;WW domain binding motif	compound eye development [GO:0048749];eye-antennal disc morphogenesis [GO:0007455];female gonad development [GO:0008585];imaginal disc development [GO:0007444];imaginal disc growth [GO:0007446];male meiosis cytokinesis [GO:0007112];negative regulation of histone H2A K63-linked ubiquitination [GO:1901315];negative regulation of smoothened signaling pathway [GO:0045879];positive regulation of canon…	nucleus [GO:0005634]";"cytoplasm [GO:0005737]	ubiquitin binding [GO:0043130];ubiquitin protein ligase activity [GO:0061630];ubiquitin-protein transferase activity [GO:0004842];ubiquitin-ubiquitin ligase activity [GO:0034450];zinc ion binding [GO:0008270]";"RNA binding [GO:0003723]	0.999508	2.42154e-11	170.47	138.85	163.41	1.3093	31933000000	24421000000	7511500000	971	2.47801	0.0415418	0.464213	0.0798799	0.0185125	0.00276494	2.0914	-0.238426	2.14692	-0.196943	4.72105	1.53376	0.276823	1.48776	0.199708	0.270283	-0.0414834	2.14692
-0.140602	-0.172921	-0.32607	-0.201797	-0.380935	-0.335286	-0.142375	-0.102	-0.165763	0.0201513	0.0103726	0.100149	-0.377751	-0.279685	-0.149934	T	2	+	Cdc2 kinase substrate motif;CDK1,2,4,6 kinase substrate motif;CDK5 kinase substrate motif;GSK-3, ERK1, ERK2, CDK5 substrate motif;WW domain binding motif	nucleosome assembly [GO:0006334]";"chromatin organization [GO:0006325]	cytoplasm [GO:0005737];nucleus [GO:0005634]";"chromatin [GO:0000785]	histone binding [GO:0042393]	1	8.71571e-83	294.15	244.58	272.88	0.27203	966940000000	748600000000	218340000000	156	2.47636	0.041471	1.91593	0.312681	0.163003	-0.0368822	0.900993	0.132411	0.254362	0.0559258	3.23428	1.79933	0.256755	0.519243	-0.092808	0.564666	0.0764851	0.254362
0.199123	0.174424	NaN	NaN	-0.442712	-0.592398	NaN	NaN	-1.26247	-0.0628665	-0.0339535	0.132906	NaN	NaN	NaN	S	3	+	14-3-3 domain binding motif;Calmodulin-dependent protein kinase II substrate motif;ERK1,2 kinase substrate motif;Growth associated histone HI kinase substrate motif;GSK-3, ERK1, ERK2, CDK5 substrate motif;PKA kinase substrate motif;PKC kinase substrate motif;WW domain binding motif	defense response to Gram-negative bacterium [GO:0050829];positive regulation of stem cell proliferation [GO:2000648]";"activation of innate immune response [GO:0002218]	nucleus [GO:0005634]";"cytoplasm [GO:0005737]		1	8.06121e-13	138.09	123.21	88.829	1.7797	281050000	196770000	84278000	421	2.47372	0.0416101	-4.34294e-08	0	-4.34294e-08	0	-4.34294e-08	0	-4.34294e-08	0	0	0.940083	-0.174745	1.94306	-0.704329	0	-1.44924	0
-0.0719796	-0.0773997	-0.155599	0.113181	0.0338493	0.092618	0.0284037	-0.031553	-0.0755024	-0.179537	-0.0903244	-0.0967441	-0.161394	-0.0962325	-0.0415385	Y	2	+	ALK kinase substrate motif;JAK2 kinase substrate motif;Src kinase substrate motif	embryonic development via the syncytial blastoderm [GO:0001700];G1/S transition of mitotic cell cycle [GO:0000082];G2/M transition of mitotic cell cycle [GO:0000086];germarium-derived cystoblast division [GO:0048142];male meiotic nuclear division [GO:0007140];mitotic cell cycle phase transition [GO:0044772];mitotic G2 DNA damage checkpoint [GO:0007095];mitotic G2/M transition checkpoint [GO:00448…	mitotic spindle [GO:0072686];nucleus [GO:0005634]";"cytoplasm [GO:0005737]	cyclin-dependent protein serine/threonine kinase activity [GO:0004693];protein kinase activity [GO:0004672];protein serine/threonine kinase activity [GO:0004674];RNA polymerase II CTD heptapeptide repeat kinase activity [GO:0008353]";"ATP binding [GO:0005524]	1	4.9357e-22	184.65	169.71	176.4	0.56373	479150000000	359570000000	119570000000	15	2.47199	0.0416906	0.191353	-0.0224802	1.88941	0.179604	0.733867	0.0735044	0.0146045	-0.00193781	2.82924	0.20071	-0.0205424	2.13931	0.181542	0.867608	0.0754422	0.0146045
-0.942543	-0.623887	-1.05254	-0.257235	0.09815	-0.331354	-0.645711	NaN	-0.535269	-1.0686	-1.05681	NaN	NaN	-0.950648	-1.07709	S	2	+	Casein kinase II substrate motif;ERK1,2 kinase substrate motif;GSK-3, ERK1, ERK2, CDK5 substrate motif;WW domain binding motif	glutathione biosynthetic process [GO:0006750];glutathione metabolic process [GO:0006749];imaginal disc-derived wing morphogenesis [GO:0007476];response to copper ion [GO:0046688]";"axonogenesis [GO:0007409];glutathione biosynthetic process [GO:0006750]	nucleus [GO:0005634];perinuclear region of cytoplasm [GO:0048471]";"glutamate-cysteine ligase complex [GO:0017109]	glutamate-cysteine ligase activity [GO:0004357]";"ATP binding [GO:0005524];glutamate-cysteine ligase activity [GO:0004357]	0.999999	7.06613e-63	263.15	253.23	208.49	0.47553	384710000	313000000	71710000	8	2.47104	0.0415771	0.282186	-0.0488421	1.76207	0.850387	1.43024	0.423377	0.324292	0.140878	3.79878	0.47364	-0.18972	1.73478	0.709509	0.705472	0.282499	0.324292
-0.287383	-0.46851	-0.518959	-0.0538179	-0.0915922	-0.0796696	-0.114901	0.00830849	0.0189838	-0.201654	-0.00887148	0.198168	-0.365753	-0.258074	-0.286942	S	2	+	ERK1,2 kinase substrate motif;G protein-coupled receptor kinase 1 substrate motif;GSK3 kinase substrate motif;GSK-3, ERK1, ERK2, CDK5 substrate motif;PKA kinase substrate motif;PKC kinase substrate motif;WW domain binding motif	negative regulation of autophagy [GO:0010507];negative regulation of macroautophagy [GO:0016242]";"juvenile hormone mediated signaling pathway [GO:0035626]	nucleus [GO:0005634]";"heterochromatin [GO:0000792]	juvenile hormone response element binding [GO:0070594];peptidyl-prolyl cis-trans isomerase activity [GO:0003755]";"FK506 binding [GO:0005528]	1	1.79337e-21	201.72	165.94	117.49	-0.42871	283530000000	229100000000	54424000000	193	2.4686	0.0416571	1.1749	0.29947	2.59078	0.228563	2.1596	0.274387	0.717592	-0.121362	6.64287	1.44667	0.420832	2.09938	0.349924	2.06406	0.395748	0.717592
NaN	0.81395	0.799791	0.328377	0.381704	0.184846	0.843984	0.271087	0.423629	0.0109586	0.0972062	-0.00969855	NaN	0.699191	0.844905	S	3	+	Casein kinase II substrate motif;G protein-coupled receptor kinase 1 substrate motif	mRNA 3'-end processing by stem-loop binding and cleavage [GO:0006398];mRNA transport [GO:0051028];multicellular organism development [GO:0007275]";"mitotic chromosome condensation [GO:0007076]	histone pre-mRNA 3'end processing complex [GO:0071204];nucleus [GO:0005634]";"cytoplasm [GO:0005737]	mRNA binding [GO:0003729];RNA stem-loop binding [GO:0035613];sequence-specific mRNA binding [GO:1990825]";"histone pre-mRNA stem-loop binding [GO:0071207]	0.999724	2.28661e-15	162.32	156.68	116.6	-0.35996	826060000	517290000	308770000	9	2.46728	0.0416014	2.7632	-0.739225	1.83083	-0.473739	0.471384	-0.259148	0.166747	0.0348233	5.23216	3.43947	-0.774049	2.16581	-0.508562	0.559242	-0.293971	0.166747
0.12488	0.181756	0.11814	-0.0489595	0.0490104	0.125687	-0.0820046	-0.0260462	0.0796753	-0.225266	-0.175186	-0.110773	-0.00218108	-0.0673598	0.0662967	S	2	+	Casein kinase I substrate motif;ERK1,2 kinase substrate motif;GSK-3, ERK1, ERK2, CDK5 substrate motif;WW domain binding motif			RNA binding [GO:0003723]	1	8.57093e-09	138.76	112.01	95.822	-0.17524	2676700000	1920600000	756070000	7	2.46672	0.0415035	1.53565	-0.169327	0.270812	0.042994	0.0469113	-0.00837708	1.51429	0.142673	3.36766	2.8868	-0.312001	0.850935	-0.0996794	1.36925	-0.151051	1.51429
0.161168	0.132678	0.123581	-0.224769	-0.253105	-0.245882	0.0663896	-0.0952145	-0.245606	-0.153974	-0.0755931	-0.0594348	-0.144323	0.0185963	-0.0732111	S	2	+	14-3-3 domain binding motif;Akt kinase substrate motif;Calmodulin-dependent protein kinase II substrate motif;G protein-coupled receptor kinase 1 substrate motif;MAPKAPK1 kinase substrate motif;PKA kinase substrate motif;PKC kinase substrate motif	apoptotic process [GO:0006915];behavioral response to ethanol [GO:0048149];Golgi organization [GO:0007030];JNK cascade [GO:0007254];negative regulation of epidermal growth factor receptor signaling pathway [GO:0042059];positive regulation of apoptotic process [GO:0043065];positive regulation of cell size [GO:0045793];positive regulation of hippo signaling [GO:0035332];positive regulation of JNK c…	cytosol [GO:0005829]";"cytoplasm [GO:0005737];cytoplasm [GO:0005737]	MAP kinase kinase kinase kinase activity [GO:0008349];protein kinase activity [GO:0004672];protein kinase C activity [GO:0004697];protein serine/threonine kinase activity [GO:0004674]";"ATP binding [GO:0005524]	0.999999	6.13687e-76	276.4	265.17	232.37	-0.079585	10402000000	7534100000	2868000000	523	2.46244	0.0416466	0.20968	-0.0300214	1.66244	-0.174939	0.0879269	-0.0251642	1.8761	0.205455	3.83615	2.77625	-0.235476	4.94276	-0.380394	1.19397	-0.230619	1.8761
-0.103196	-0.673335	-0.842823	-0.160491	-0.310115	-0.251066	0.603243	0.631259	0.327725	-0.593506	-0.290203	-0.0359	-0.5078	-0.377678	-0.0998191	S	2	+	Casein kinase II substrate motif	mismatch repair [GO:0006298]";"DNA replication, removal of RNA primer [GO:0043137]	ribonuclease H2 complex [GO:0032299]	RNA binding [GO:0003723];RNA-DNA hybrid ribonuclease activity [GO:0004523]";"metal ion binding [GO:0046872]	1	2.09421e-22	204.85	189.22	179.67	0.19656	133800000000	105030000000	28767000000	2	2.46017	0.0416549	0.0368953	0.0218958	0.275767	0.0878747	2.27282	0.849174	0.344698	-0.211353	2.93018	0.351427	0.233248	0.585941	0.299227	1.91533	1.06053	0.344698
0.40815	0.635297	0.491767	0.202633	0.0970222	0.0459259	0.819502	0.880553	0.655873	0.34573	0.323925	0.297803	0.134649	0.673447	0.540341	T	2	+	Casein kinase II substrate motif	mRNA splicing, via spliceosome [GO:0000398];pole cell development [GO:0007277];pole plasm mRNA localization [GO:0019094];pole plasm oskar mRNA localization [GO:0045451]";"anterior/posterior pattern specification [GO:0009952]	cytoplasm [GO:0005737];cytosol [GO:0005829];precatalytic spliceosome [GO:0071011];ribonucleoprotein complex [GO:1990904]";"catalytic step 2 spliceosome [GO:0071013]		1	7.94708e-30	189.57	183.78	174.22	0.62162	35235000000	22991000000	12245000000	316	2.45952	0.0415439	0.320114	-0.126993	0.927236	-0.334285	0.892754	0.335831	0.130706	0.0622593	2.27081	1.30838	-0.189252	2.09698	-0.396544	1.35543	0.273571	0.130706
0.171751	NaN	0.032242	0.0954519	0.0836844	-0.168658	-0.333589	-0.39191	-0.189569	-0.643586	NaN	-0.394923	-0.203336	-0.145605	-0.214642	S	2	+	G protein-coupled receptor kinase 1 substrate motif	protein neddylation [GO:0045116]	protein-containing complex [GO:0032991]";"cytoplasm [GO:0005737]	NEDD8 activating enzyme activity [GO:0019781];protein heterodimerization activity [GO:0046982]";"amyloid-beta binding [GO:0001540];NEDD8 activating enzyme activity [GO:0019781]	1	4.04227e-16	204.51	176.99	119.5	-0.43402	13894000000	11535000000	2359100000	2	2.44806	0.0423217	1.38068	-0.331393	1.01176	0.191354	0.853027	-0.117162	1.79454	0.289858	5.04001	1.31128	-0.621251	0.31785	-0.0985038	1.6507	-0.407019	1.79454
0.796528	1.92075	1.6118	-0.37845	-0.513206	0.123085	-0.292249	-1.18111	-0.297421	-0.227298	0.0520713	-0.607403	-0.506972	0.56511	-0.488512	S	3	+	ERK1,2 kinase substrate motif;GSK-3, ERK1, ERK2, CDK5 substrate motif;MDC1 BRCT domain binding motif;Plk1 PBD domain binding motif;WW domain binding motif	imaginal disc-derived leg morphogenesis [GO:0007480];negative regulation of chromatin silencing [GO:0031936];negative regulation of transcription, DNA-templated [GO:0045892];nervous system development [GO:0007399];positive regulation of transcription by RNA polymerase II [GO:0045944];positive regulation of transcription, DNA-templated [GO:0045893];transcription, DNA-templated [GO:0006351]";"gene …	euchromatin [GO:0000791];heterochromatin [GO:0000792];histone acetyltransferase complex [GO:0000123];nBAF complex [GO:0071565];nuclear chromatin [GO:0000790];nucleus [GO:0005634];polytene chromosome [GO:0005700];polytene chromosome chromocenter [GO:0005701];RSC-type complex [GO:0016586]";"cytoplasm [GO:0005737]	histone acetyltransferase activity [GO:0004402];histone binding [GO:0042393];metal ion binding [GO:0046872]";"chromatin binding [GO:0003682];metal ion binding [GO:0046872]	0.99929	5.00653e-119	307	302.7	148.33	0.71826	9053200000	7230800000	1822500000	890	2.44782	0.0421742	0.105107	-0.117419	0.100219	-0.112732	0.41158	-0.446804	1.50425	1.58648	2.12115	1.93709	-1.7039	1.92826	-1.69922	1.98214	-2.03329	1.50425
NaN	-0.466078	-0.303778	NaN	0.191199	0.177722	NaN	-0.299469	-0.194064	NaN	0.0185686	-0.00362573	NaN	-0.168074	-0.308509	S	3	+	14-3-3 domain binding motif;AMP-activated protein kinase 2 substrate motif;b-Adrenergic Receptor kinase substrate motif;Calmodulin-dependent protein kinase II substrate motif;Cdc2 kinase substrate motif;CDK kinase substrate motif;CDK1,2,4,6 kinase substrate motif;ERK1,2 kinase substrate motif;GSK-3, ERK1, ERK2, CDK5 substrate motif;MAPKAPK1 kinase substrate motif;PKA kinase substrate motif;PKC ki…	protein refolding [GO:0042026]";"mRNA splicing, via spliceosome [GO:0000398]	cytosol [GO:0005829];nucleoplasm [GO:0005654];nucleus [GO:0005634];precatalytic spliceosome [GO:0071011]";"catalytic step 2 spliceosome [GO:0071013]	unfolded protein binding [GO:0051082]";"peptidyl-prolyl cis-trans isomerase activity [GO:0003755]	1	0.000618421	112.59	66.201	39.785	0.11107	5330300000	3856800000	1473500000	743	2.44404	0.0423264	1.12815	0.245763	1.57299	0.422752	0.0306292	-0.00847472	0.515499	-0.146636	3.24727	1.38814	0.392399	1.70234	0.569388	0.538338	0.138162	0.515499
0.0384427	0.663687	0.840082	-0.561206	-0.656816	-0.418315	-0.0511381	0.0183493	0.406357	-0.255278	-0.44896	-0.396224	-0.285422	-0.344278	-0.960834	S	3	+	ERK1,2 kinase substrate motif;Growth associated histone HI kinase substrate motif;GSK-3, ERK1, ERK2, CDK5 substrate motif;PKA kinase substrate motif;PKC kinase substrate motif;WW domain binding motif				1	2.98943e-64	251.52	246.19	183.49	0.033605	5054900000	3728700000	1326200000	92	2.44285	0.0423253	0.296256	0.163357	0.0224741	-0.0152679	1.18977	0.6547	1.48708	1.04425	2.99558	1.61322	-0.880891	1.85982	-1.05952	0.621552	-0.389548	1.48708
-0.112576	0.46067	0.365617	-0.549345	-0.45059	-0.469668	-0.168662	-0.111099	-0.366526	-0.261981	-0.515337	-0.280573	-0.221245	-0.409352	-0.294672	S	2	+	14-3-3 domain binding motif;Aurora-A kinase substrate motif;Calmodulin-dependent protein kinase II substrate motif;DMPK1 kinase substrate motif;G protein-coupled receptor kinase 1 substrate motif;MAPKAPK1 kinase substrate motif;MAPKAPK2 kinase substrate motif;p70 Ribosomal S6 kinase substrate motif;PAK2 kinase substrate motif;Phosphorylase kinase substrate motif;PKA kinase substrate motif;PKC eps…	nucleolus organization [GO:0007000]";"multicellular organism development [GO:0007275]	nucleus [GO:0005634];spindle [GO:0005819]";"nucleolus [GO:0005730]		1	1.86697e-06	120.32	110.79	92.913	-0.67475	3910900000	2821500000	1089400000	999	2.43696	0.042731	0.170117	-0.0442074	1.35603	-0.181445	0.417957	0.0929939	1.37409	0.546326	3.3182	1.40927	-0.590534	1.80842	-0.727771	1.10158	-0.453333	1.37409
NaN	0.29506	0.345232	NaN	0.150573	0.00165764	NaN	-0.254272	0.0902498	NaN	-0.325471	-0.422124	NaN	0.624631	0.571862	S	3	+	14-3-3 domain binding motif;AMP-activated protein kinase substrate motif;Calmodulin-dependent protein kinase I substrate motif;Calmodulin-dependent protein kinase II alpha substrate motif;Calmodulin-dependent protein kinase II substrate motif;Calmodulin-dependent protein kinase IV substrate motif;Chk1 kinase substrate motif;DNA dependent Protein kinase substrate motif;PAK2 kinase substrate motif;…	learning or memory [GO:0007611];locomotor rhythm [GO:0045475];long-term memory [GO:0007616];medium-term memory [GO:0072375];neuromuscular junction development [GO:0007528];positive regulation of feeding behavior [GO:2000253];positive regulation of transcription by RNA polymerase II [GO:0045944];regulation of circadian sleep/wake cycle, sleep [GO:0045187];regulation of transcription, DNA-templated…	transcription factor complex [GO:0005667]";"nucleus [GO:0005634];nucleus [GO:0005634]	DNA-binding transcription factor activity [GO:0003700];DNA-binding transcription factor activity [GO:0003700]";sequence-specific DNA binding [GO:0043565]";"DNA binding [GO:0003677]	0.983198	0.000432212	85.163	49.436	71.933	-0.061132	741100000	491480000	249630000	198	2.43597	0.0426735	2.49578	-0.972044	1.65497	-0.522131	1.22328	-0.680258	1.77703	-0.2781	7.15107	2.21464	-0.693944	1.04623	-0.244031	0.832343	-0.402158	1.77703
0.455409	0.467532	0.624257	0.287271	-0.0213475	-0.0776346	0.723993	0.560355	0.43176	0.235017	0.121551	0.143355	0.219952	0.482132	0.326699	S	2	+	ATM kinase substrate motif;Casein kinase II substrate motif;DNA dependent Protein kinase substrate motif;PKA kinase substrate motif;PKC kinase substrate motif;Pyruvate dehydrogenase kinase substrate motif				1	1.37566e-89	283.05	267.39	187.54	-1.1885	16756000000	11167000000	5589800000	717	2.42994	0.0430137	0.98768	-0.176287	0.960333	-0.280165	0.94189	0.229108	0.858795	0.172805	3.7487	2.24736	-0.349092	1.64332	-0.45297	0.218002	0.0563029	0.858795
-0.419985	-1.03705	-0.838828	-0.175367	-0.328606	-0.269877	-0.298517	-0.384646	-0.383197	-0.123748	0.133822	-0.159152	-0.247132	-0.236741	-0.233227	S	4	+	b-Adrenergic Receptor kinase substrate motif;Casein kinase II substrate motif;Plk1 kinase substrate motif;Pyruvate dehydrogenase kinase substrate motif	learning or memory [GO:0007611];locomotor rhythm [GO:0045475];long-term memory [GO:0007616];medium-term memory [GO:0072375];neuromuscular junction development [GO:0007528];positive regulation of feeding behavior [GO:2000253];positive regulation of transcription by RNA polymerase II [GO:0045944];regulation of circadian sleep/wake cycle, sleep [GO:0045187];regulation of transcription, DNA-templated…	transcription factor complex [GO:0005667]";"nucleus [GO:0005634];nucleus [GO:0005634]	DNA-binding transcription factor activity [GO:0003700];DNA-binding transcription factor activity [GO:0003700]";sequence-specific DNA binding [GO:0043565]";"DNA binding [GO:0003677]	0.999878	2.55812e-25	159.54	154.64	151.67	-0.88959	6957800000	5510700000	1447100000	180	2.42176	0.0436041	0.959198	0.18934	0.158174	-0.018917	1.80883	-0.11642	1.35214	-0.526255	4.27834	1.60709	0.715595	1.27086	0.507338	1.04577	0.409835	1.35214
0.374656	0.474566	NaN	-0.035594	-0.0393144	0.033561	NaN	NaN	NaN	-0.0195739	-0.164968	-0.316528	NaN	-0.142099	NaN	S	2	+	Casein kinase II substrate motif;Cdc2 kinase substrate motif;CDK kinase substrate motif;CDK1,2,4,6 kinase substrate motif;ERK1,2 kinase substrate motif;GSK-3, ERK1, ERK2, CDK5 substrate motif;WW domain binding motif	DNA replication initiation [GO:0006270];mitotic cell cycle [GO:0000278];mitotic DNA replication checkpoint [GO:0033314]";"cell division [GO:0051301]	nucleus [GO:0005634]	DNA replication origin binding [GO:0003688]	0.978463	2.87481e-11	151.03	143.99	118.96	-1.0554	453530000	298640000	154900000	158	2.41605	0.0439184	-4.34294e-08	0	-4.34294e-08	0	-4.34294e-08	0	-4.34294e-08	0	0	1.82846	-0.591634	2.55184	-0.438393	0	NaN	0
0.0372407	-0.292546	-0.322995	0.739796	0.545617	0.513912	0.546597	0.61106	0.222207	0.214549	0.633166	0.110586	0.102206	-0.250862	0.0519985	S	2	+	Cdc2 kinase substrate motif;CDK kinase substrate motif;CDK1,2,4,6 kinase substrate motif;DNA dependent Protein kinase substrate motif;ERK1,2 kinase substrate motif;Growth associated histone HI kinase substrate motif;GSK-3, ERK1, ERK2, CDK5 substrate motif;PKA kinase substrate motif;PKC kinase substrate motif;WW domain binding motif			metal ion binding [GO:0046872]	1	6.62888e-49	241.51	227.34	213.69	0.1757	9337500000	6588400000	2749200000	917	2.41423	0.0439051	0.840925	0.351653	2.07144	0.631995	1.40521	0.492174	0.430281	-0.160547	4.74786	1.22147	0.5122	2.37351	0.792542	1.76186	0.652721	0.430281
-0.154652	-0.384458	-0.462763	-0.016258	-0.0357155	-0.0460921	-0.262056	-0.330476	-0.393905	-0.0365135	0.0504493	0.0538039	-0.248649	0.0351957	-0.0844101	S	3	+	14-3-3 domain binding motif;Calmodulin-dependent protein kinase II substrate motif;Casein kinase II substrate motif;G protein-coupled receptor kinase 1 substrate motif;MAPKAPK1 kinase substrate motif;PAK2 kinase substrate motif;Pim1 kinase substrate sequence;PKA kinase substrate motif;PKA, PKG kinase substrate motif;PKC epsilon kinase substrate motif;PKC kinase substrate motif;PKG kinase substrat…	negative regulation of innate immune response [GO:0045824];negative regulation of Toll signaling pathway [GO:0045751];positive regulation of cell growth [GO:0030307];post-translational protein modification [GO:0043687];protein deubiquitination [GO:0016579];regulation of antimicrobial peptide production [GO:0002784];regulation of gene silencing [GO:0060968];regulation of protein stability [GO:0031…	nucleus [GO:0005634]	thiol-dependent ubiquitin-specific protease activity [GO:0004843]";"cysteine-type endopeptidase activity [GO:0004197];thiol-dependent ubiquitin-specific protease activity [GO:0004843]	1	5.48364e-15	164.18	127	119.38	-0.28696	20068000000	15142000000	4926600000	1522	2.4124	0.0439122	0.627494	0.121868	0.331631	0.0665994	1.19016	-0.229524	0.883295	-0.23467	3.03258	1.67091	0.356537	1.50092	0.301269	0.0170831	0.00514521	0.883295
0.130576	0.339634	0.302438	0.000240568	-0.0105374	-0.0343658	0.0432244	0.0492739	-0.0461657	-0.154941	-0.13699	-0.19068	-0.0261723	0.28962	0.330826	S	2	+	Cdc2 kinase substrate motif;CDK kinase substrate motif;CDK1,2,4,6 kinase substrate motif;ERK1,2 kinase substrate motif;G protein-coupled receptor kinase 1 substrate motif;Growth associated histone HI kinase substrate motif;GSK-3, ERK1, ERK2, CDK5 substrate motif;PKA kinase substrate motif;PKC kinase substrate motif;WW domain binding motif	regulation of alternative mRNA splicing, via spliceosome [GO:0000381]	nucleus [GO:0005634]	zinc ion binding [GO:0008270]	1	1.84071e-62	257.35	225.74	238.83	0.63285	30948000000	22280000000	8668600000	1013	2.4097	0.0440135	1.46312	-0.358962	0.875757	-0.212979	0.713902	-0.182647	0.173411	0.0594583	3.22619	2.49181	-0.41842	1.85599	-0.272437	1.56054	-0.242105	0.173411
-0.535153	-1.18996	-1.25329	-0.205086	-0.513607	-0.380987	-0.131117	-0.39413	-0.576987	-0.360085	-0.376894	-0.439892	-0.0864984	0.0370074	0.0114398	S	2	+	Cdc2 kinase substrate motif;CDK kinase substrate motif;CDK1,2,4,6 kinase substrate motif;ERK1,2 kinase substrate motif;G protein-coupled receptor kinase 1 substrate motif;Growth associated histone HI kinase substrate motif;GSK-3, ERK1, ERK2, CDK5 substrate motif;WW domain binding motif	fatty acid biosynthetic process [GO:0006633]		fatty acid ligase activity [GO:0015645]";"CoA-ligase activity [GO:0016405]	1	5.17403e-41	232.26	215.34	156.72	0.039986	13731000000	11346000000	2384900000	9	2.40875	0.043953	2.97352	-0.379606	1.66204	-0.353876	1.23617	-0.354728	1.86809	-0.980117	7.73983	1.22217	0.600511	1.195	0.626241	1.11606	0.62539	1.86809
NaN	-0.066182	-0.00781286	NaN	-0.441536	-0.359974	NaN	-0.784681	-0.778581	NaN	-0.366412	-0.712268	NaN	-0.011937	0.0636125	S	2	+	14-3-3 domain binding motif;Calmodulin-dependent protein kinase I substrate motif;Calmodulin-dependent protein kinase II substrate motif;Calmodulin-dependent protein kinase IV substrate motif;Casein kinase II substrate motif;Chk1 kinase substrate motif;G protein-coupled receptor kinase 1 substrate motif;PKA kinase substrate motif;PKC kinase substrate motif	cell morphogenesis [GO:0000902];compound eye development [GO:0048749];inactivation of MAPK activity [GO:0000188];mitotic cell cycle [GO:0000278];mushroom body development [GO:0016319];negative regulation of actin filament polymerization [GO:0030837];nuclear migration [GO:0007097];protein dephosphorylation [GO:0006470];regulation of actin filament polymerization [GO:0030833];regulation of actin po…	cytoplasm [GO:0005737];cytoskeleton [GO:0005856]";"apical part of cell [GO:0045177]	phosphoprotein phosphatase activity [GO:0004721];protein tyrosine phosphatase activity [GO:0004725]";protein tyrosine/serine/threonine phosphatase activity [GO:0008138];"actin binding [GO:0003779];"protein tyrosine/serine/threonine phosphatase activity [GO:0008138]	0.999979	1.3971e-14	187.76	84.07	187.76	-0.0074859	2937400000	2294000000	643450000	536	2.39604	0.0450502	1.06718	-0.565178	1.78096	-0.426593	2.65846	-0.807469	0.496643	-0.0628352	6.00324	0.985771	-0.502343	1.73329	-0.363758	2.80987	-0.744634	0.496643
-0.103697	-0.383394	-0.34672	0.0955196	0.355467	0.16403	-0.0731952	-0.0838265	-0.0984481	0.30381	0.393687	0.0752872	NaN	-0.0888345	0.0856059	S	2	+	Casein kinase II substrate motif	response to toxic substance [GO:0009636];transmembrane transport [GO:0055085]";"renal tubular secretion [GO:0097254]	membrane [GO:0016020];plasma membrane [GO:0005886];vacuolar membrane [GO:0005774]";"integral component of membrane [GO:0016021]	ATP binding [GO:0005524]";"ATPase activity, coupled to transmembrane movement of substances [GO:0042626]	1	3.56552e-13	146.91	142.43	99.722	1.1189	8973700000	6985000000	1988700000	949	2.39363	0.04502	0.801011	0.259209	0.738527	0.20662	0.532963	-0.0835423	0.904037	-0.276322	2.97654	1.84447	0.535531	1.83461	0.482942	1.02784	0.19278	0.904037
0.46186	0.0841346	0.0983217	-0.326717	0.00371474	-0.0913562	0.0284048	0.180401	-0.159729	-0.0822551	-0.0580037	-0.262851	0.367483	0.47602	0.508587	S	2	+	14-3-3 domain binding motif;BARD1 BRCT domain binding motif;Calmodulin-dependent protein kinase II substrate motif;Calmodulin-dependent protein kinase IV substrate motif;Casein kinase II substrate motif;G protein-coupled receptor kinase 1 substrate motif;PKA kinase substrate motif;PKC kinase substrate motif				1	0.000227171	123.11	104.94	96.034	0.22944	3684500000	2610000000	1074500000	246	2.39332	0.0449169	2.78412	-0.585067	2.27317	-0.588816	1.81065	-0.434338	0.837056	-0.235924	7.705	1.17688	-0.349142	1.05016	-0.352892	0.556758	-0.198413	0.837056
0.135837	0.190177	0.133738	-0.157028	-0.148358	-0.24994	-0.139292	-0.151239	-0.243393	-0.282957	-0.170828	-0.130971	-0.12497	0.242659	0.268773	S	2	+	14-3-3 domain binding motif;Calmodulin-dependent protein kinase II substrate motif;Casein kinase II substrate motif;G protein-coupled receptor kinase 1 substrate motif;PKA kinase substrate motif;PKC kinase substrate motif	cellular response to hydroxyurea [GO:0072711];cellular response to ionizing radiation [GO:0071479];DNA duplex unwinding [GO:0032508];DNA recombination [GO:0006310];DNA repair [GO:0006281];DNA strand renaturation [GO:0000733];DNA synthesis involved in DNA repair [GO:0000731];double-strand break repair [GO:0006302];double-strand break repair involved in meiotic recombination [GO:1990918];double-str…	cytoplasm [GO:0005737];cytosol [GO:0005829];lateral element [GO:0000800];nuclear chromosome [GO:0000228];nuclear matrix [GO:0016363];nucleolus [GO:0005730];nucleus [GO:0005634];pronucleus [GO:0045120];replication fork [GO:0005657]";"chromosome [GO:0005694]	annealing helicase activity [GO:0036310];ATP binding [GO:0005524];ATP-dependent 3'-5' DNA helicase activity [GO:0043140];ATP-dependent DNA helicase activity [GO:0004003];bubble DNA binding [GO:0000405];DNA binding [GO:0003677];DNA helicase activity [GO:0003678];DNA-dependent ATPase activity [GO:0008094];forked DNA-dependent helicase activity [GO:0061749];four-way junction DNA binding [GO:0000400]…	1	2.55912e-31	190.81	178.2	122.45	1.1149	8102200000	6063600000	2038600000	151	2.38915	0.0451722	1.12764	-0.323739	1.12517	-0.313929	1.09864	-0.306795	0.0662971	0.02443	3.41774	2.68001	-0.348169	3.08272	-0.338359	3.03255	-0.331225	0.0662971
NaN	-0.634419	-0.404821	NaN	NaN	-0.268695	NaN	0.276794	0.306003	NaN	0.425243	0.398648	NaN	NaN	-0.712031	S	2	+	PKA kinase substrate motif;PKC kinase substrate motif	neuromuscular junction development [GO:0007528];positive regulation of GTPase activity [GO:0043547]";"endosome to lysosome transport via multivesicular body sorting pathway [GO:0032510]	Mon1-Ccz1 complex [GO:0035658];synaptic cleft [GO:0043083]";"cytosol [GO:0005829]		0.5	0.00538398	66.663	41.968	53.08	-0.20219	1318300000	802140000	516140000	463	2.38382	0.0456106	-4.34294e-08	0	-4.34294e-08	0	-4.34294e-08	0	-4.34294e-08	0	0	1.82265	0.931566	0	0.250925	1.70423	0.811019	0
NaN	-0.634419	-0.404821	NaN	NaN	-0.268695	NaN	0.276794	0.306003	NaN	0.425243	0.398648	NaN	NaN	-0.712031	S	2	+	MDC1 BRCT domain binding motif;Plk1 PBD domain binding motif	neuromuscular junction development [GO:0007528];positive regulation of GTPase activity [GO:0043547]";"endosome to lysosome transport via multivesicular body sorting pathway [GO:0032510]	Mon1-Ccz1 complex [GO:0035658];synaptic cleft [GO:0043083]";"cytosol [GO:0005829]		0.5	0.00538398	66.663	41.968	53.08	-0.20219	1318300000	802140000	516140000	464	2.38382	0.0454605	-4.34294e-08	0	-4.34294e-08	0	-4.34294e-08	0	-4.34294e-08	0	0	1.82265	0.931566	0	0.250925	1.70423	0.811019	0
0.597375	0.443274	0.0713322	0.180826	0.428335	0.299763	-0.0366436	-0.0419179	-0.3119	0.179687	0.036142	0.0641834	-0.2469	-0.1138	-0.419256	S	2	+	14-3-3 domain binding motif;Calmodulin-dependent protein kinase II substrate motif;Casein kinase II substrate motif;PAK2 kinase substrate motif;Pim1 kinase substrate sequence;PKA kinase substrate motif;PKC epsilon kinase substrate motif;PKC kinase substrate motif;ZIP kinase substrate motif	immune response [GO:0006955]";"cytoplasmic translation [GO:0002181];translation [GO:0006412]	cytosolic small ribosomal subunit [GO:0022627]";"cytosolic ribosome [GO:0022626];ribosome [GO:0005840]	structural constituent of ribosome [GO:0003735]	1	1.1193e-05	150.22	91.973	78.541	-0.29632	51504000000	38051000000	13452000000	233	2.38214	0.0454295	1.6346	0.353323	2.11058	0.56296	0.439185	0.129832	1.60962	0.630646	5.79399	0.789199	-0.277323	0.146568	-0.067686	1.29911	-0.500815	1.60962
NaN	NaN	NaN	0.336949	0.32239	0.239333	0.0833962	-0.0657326	-0.0220562	0.0408724	0.143714	0.214801	NaN	0.0236102	0.0100493	S	3	+	b-Adrenergic Receptor kinase substrate motif;Casein kinase I substrate motif;Casein kinase II substrate motif;G protein-coupled receptor kinase 1 substrate motif;GSK3 kinase substrate motif;PKA kinase substrate motif;PKC kinase substrate motif	MAPK cascade [GO:0000165];positive regulation of JNK cascade [GO:0046330];positive regulation of stress-activated MAPK cascade [GO:0032874];protein phosphorylation [GO:0006468];regulation of adult chitin-containing cuticle pigmentation [GO:0048082]";"activation of MAPKK activity [GO:0000186]	protein kinase complex [GO:1902911]";"intracellular [GO:0005622]	MAP kinase kinase kinase activity [GO:0004709];protein kinase activity [GO:0004672];protein kinase C activity [GO:0004697]";"ATP binding [GO:0005524]	0.993117	1.04559e-11	139.28	129.9	139.28	-0.88189	628190000	418380000	209820000	929	2.38174	0.0453464	0.761215	0.1163	2.24818	0.282727	0.113102	-0.018294	-4.34294e-08	0	3.1225	0	NaN	0	NaN	0	NaN	0
-0.277796	-1.28563	-1.28015	-0.573652	-0.221304	-0.262326	-1.13749	-0.330967	-0.320218	0.657091	0.301588	0.320883	NaN	-1.27155	-1.47637	S	2	+	ATM kinase substrate motif;DNA dependent Protein kinase substrate motif	translational elongation [GO:0006414]	cytosol [GO:0005829]	GTP binding [GO:0005525];translation elongation factor activity [GO:0003746]";"GTPase activity [GO:0003924]	1	3.97324e-05	108.66	108.66	108.66	-0.041441	611810000	490020000	121790000	838	2.37629	0.0458046	2.76463	1.80048	2.08888	1.02154	0.928309	0.777738	0.39413	0.426107	6.17595	1.74802	1.37438	0.777433	0.59543	0.337158	0.351631	0.39413
NaN	0.708496	0.816231	NaN	-0.0446277	-0.209712	-0.562782	0.0353423	-0.176984	NaN	-0.275577	-0.195253	NaN	0.637286	0.435735	S	2	+	b-Adrenergic Receptor kinase substrate motif;Casein kinase II substrate motif;G protein-coupled receptor kinase 1 substrate motif	mRNA transcription by RNA polymerase II [GO:0042789];nucleosome organization [GO:0034728];ovarian follicle cell development [GO:0030707];positive regulation of transcription elongation from RNA polymerase II promoter [GO:0032968];positive regulation of transcription elongation from RNA polymerase II promoter [GO:0032968]";regulation of antimicrobial peptide biosynthetic process [GO:0002805];regul…	nucleus [GO:0005634];polytene chromosome interband [GO:0005705];polytene chromosome puff [GO:0005703];transcription elongation factor complex [GO:0008023]";transcriptionally active chromatin [GO:0035327];"histone locus body [GO:0035363];nucleus [GO:0005634]	DNA binding [GO:0003677];histone binding [GO:0042393];nucleosome binding [GO:0031491];RNA polymerase II complex binding [GO:0000993]";"chromatin binding [GO:0003682];DNA binding [GO:0003677]	1	1.68136e-186	386.14	356.81	386.14	-1.3062	3308200000	2263700000	1044500000	7	2.36349	0.0466688	1.71706	-0.771925	1.43852	-0.66368	1.31964	-0.771318	0.728767	0.225853	5.20399	2.34638	-0.997778	1.9188	-0.889533	1.64742	-0.997172	0.728767
-0.154385	-0.658518	-0.37649	0.0105446	-0.0239601	0.0394992	-0.455714	-0.486713	-0.80472	-0.16706	0.108152	0.200661	-0.174809	0.0585448	0.0883955	S	3	+	b-Adrenergic Receptor kinase substrate motif;Casein kinase II substrate motif;Pyruvate dehydrogenase kinase substrate motif	mitotic DNA replication checkpoint [GO:0033314]	nucleus [GO:0005634]		1	5.98179e-127	337.83	320.97	235.98	-0.74239	34040000000	26602000000	7437900000	114	2.36202	0.0468803	0.152705	0.0565408	0.0740955	0.0179843	1.83478	-0.573093	1.08386	-0.387175	3.14544	1.14053	0.443715	1.29183	0.405159	0.433481	-0.185918	1.08386
-0.490959	-0.866711	-0.816725	-0.530674	-0.587987	-0.367886	-0.445575	-0.615754	-0.68359	-0.0156235	-0.184101	-0.168696	-0.328186	-0.541838	-0.585033	S	2	+	14-3-3 domain binding motif;Calmodulin-dependent protein kinase II substrate motif;MAPKAPK2 kinase substrate motif;PKA kinase substrate motif;PKC kinase substrate motif	protein import into nucleus [GO:0006606]	nuclear pore nuclear basket [GO:0044615]";"nuclear pore central transport channel [GO:0044613]	structural constituent of nuclear pore [GO:0017056]";"nuclear localization sequence binding [GO:0008139]	1	2.91484e-10	152.54	112.96	119.39	0.49028	1898400000	1484400000	414030000	392	2.36113	0.0468258	1.71029	0.362212	0.0343847	-0.010497	0.381837	-0.0966209	0.778	-0.239779	2.90451	2.0145	0.601992	0.783409	0.229282	0.448045	0.143158	0.778
0.288237	-0.172806	-0.0389785	1.27228	0.722052	0.692219	0.426468	-0.113955	0.0371185	-0.0856659	0.291997	-0.0404098	0.0739876	-0.321295	-0.168121	S	2	+	b-Adrenergic Receptor kinase substrate motif;Cdc2 kinase substrate motif;CDK kinase substrate motif;CDK1,2,4,6 kinase substrate motif;ERK1,2 kinase substrate motif;GSK-3, ERK1, ERK2, CDK5 substrate motif;MAPKAPK2 kinase substrate motif;WW domain binding motif	piRNA metabolic process [GO:0034587]";"mature miRNA 3'-end processing [GO:0044747]	ribonucleoprotein complex [GO:1990904]	3'-5'-exoribonuclease activity involved in mature miRNA 3'-end processing [GO:0044748];metal ion binding [GO:0046872];nucleic acid binding [GO:0003676]";"3'-5' exonuclease activity [GO:0008408]	1	7.48663e-08	158.06	82.863	151.07	0.90623	4734400000	3288000000	1446400000	386	2.35825	0.0469904	0.513093	0.193783	2.02485	1.03399	0.57355	0.25502	0.385967	0.16396	3.49746	0.0567882	0.0298227	1.69377	0.870034	0.161921	0.0910592	0.385967
-0.528096	-0.522456	-0.675246	-0.141483	0.434151	0.345398	-0.156391	0.124725	0.0319695	-0.0745666	0.147331	0.277214	-0.472036	-0.0581233	-0.229701	S	2	+	Casein kinase II substrate motif;Cdc2 kinase substrate motif;CDK kinase substrate motif;CDK1,2,4,6 kinase substrate motif;DNA dependent Protein kinase substrate motif;ERK1,2 kinase substrate motif;GSK-3, ERK1, ERK2, CDK5 substrate motif;WW domain binding motif	negative regulation of mitotic recombination [GO:0045950];replication fork protection [GO:0048478]";"DNA catabolic process, exonucleolytic [GO:0000738]	nucleus [GO:0005634]	double-stranded DNA 3'-5' exodeoxyribonuclease activity [GO:0008311];metal ion binding [GO:0046872];nucleic acid binding [GO:0003676];nucleic acid binding [GO:0003676]";single-stranded DNA 3'-5' exodeoxyribonuclease activity [GO:0008310]";"3'-5' exonuclease activity [GO:0008408]	1	5.85154e-46	245.18	236.88	119.76	-0.13375	77376000000	56697000000	20679000000	111	2.35747	0.0468718	1.10098	0.369946	1.01494	0.465976	0.803536	0.253388	1.16403	-0.321979	4.08349	2.42598	0.691925	1.87773	0.787955	2.39842	0.575367	1.16403
-0.147056	0.059754	0.0926725	0.131775	0.801897	0.655498	-0.615059	-0.295701	-0.383043	-0.0573136	-0.0347952	-0.00709811	-0.36509	0.0318651	0.10674	S	3	+	b-Adrenergic Receptor kinase substrate motif;Casein kinase II substrate motif;Pyruvate dehydrogenase kinase substrate motif	cell proliferation [GO:0008283]	nucleolus [GO:0005730];nucleus [GO:0005634];protein-containing complex [GO:0032991]";"cytoplasm [GO:0005737]	mRNA binding [GO:0003729];sequence-specific DNA binding [GO:0043565]";"DNA binding [GO:0003677];RNA binding [GO:0003723]	1	9.53257e-267	461.59	443.68	279.78	0.98832	292190000000	234710000000	57477000000	129	2.35663	0.0467604	0.103813	0.042426	1.13569	0.605218	0.953258	-0.355773	0.178509	0.0772853	2.37127	0.172665	-0.0348592	1.14514	0.527933	1.63148	-0.433058	0.178509
NaN	-0.568451	-0.566532	NaN	0.248338	0.454224	NaN	-0.0897235	0.23344	NaN	0.207232	0.345452	NaN	-0.253089	-0.415122	S	3	+	b-Adrenergic Receptor kinase substrate motif;Casein kinase II substrate motif;MAPKAPK2 kinase substrate motif	signal peptide processing [GO:0006465]";"protein targeting to ER [GO:0045047]	organelle membrane [GO:0031090];signal peptidase complex [GO:0005787]";"integral component of endoplasmic reticulum membrane [GO:0030176]	peptidase activity [GO:0008233]	0.996773	8.2646e-54	227.74	224.86	195.35	-0.31279	2384300000	1875000000	509370000	88	2.35315	0.0468981	1.53598	0.610447	1.46037	0.685386	0.813085	0.405963	0.989914	-0.233386	4.79934	2.1777	0.843834	1.90927	0.918773	1.23403	0.63935	0.989914
-0.698449	-0.802799	-0.586235	-0.973956	-0.436257	-0.493822	-1.67418	-0.911552	-0.688573	0.472072	-0.0594725	0.135586	-1.23654	-0.964751	-0.758004	S	2	+	Casein kinase II substrate motif;Plk1 kinase substrate motif	sex differentiation [GO:0007548]	extracellular region [GO:0005576]	carboxylic ester hydrolase activity [GO:0052689]	1	4.88931e-81	308.81	273.88	290.44	0.58055	5764700000	4707200000	1057500000	67	2.35199	0.0468889	2.30692	1.16916	0.733845	0.351753	0.116013	-0.105006	0.891067	0.290603	4.04784	2.20067	0.878556	0.123092	0.0611492	0.578063	-0.395609	0.891067
-0.192226	-0.335452	-0.245785	0.0359248	0.0192198	-0.0975369	-0.218382	-0.418077	-0.412224	-0.265063	-0.237013	-0.141806	-0.196268	-0.190123	-0.098584	S	2	+	ERK1,2 kinase substrate motif;GSK-3, ERK1, ERK2, CDK5 substrate motif;WW domain binding motif	DNA endoreduplication [GO:0042023];eggshell chorion gene amplification [GO:0007307];endomitotic cell cycle [GO:0007113];intrinsic apoptotic signaling pathway in response to DNA damage [GO:0008630];maintenance of mitotic sister chromatid cohesion [GO:0034088];negative regulation of apoptotic process [GO:0043066];negative regulation of DNA replication [GO:0008156];negative regulation of G1/S transi…	Myb complex [GO:0031523];nucleoplasm [GO:0005654];nucleus [GO:0005634];Rb-E2F complex [GO:0035189];transcription factor complex [GO:0005667]";"chromatin [GO:0000785]	RNA polymerase II regulatory region DNA binding [GO:0001012];transcription factor binding [GO:0008134];transcription regulatory region DNA binding [GO:0044212]";"RNA polymerase II activating transcription factor binding [GO:0001102]	1	1.09394e-40	226.1	214.18	195.1	0.15587	22105000000	16217000000	5888100000	728	2.35194	0.0467405	0.469218	-0.0529686	1.31505	0.147528	1.21254	-0.187903	0.853076	-0.0961626	3.84988	0.315499	0.043194	1.83328	0.24369	0.517708	-0.0917403	0.853076
NaN	-0.227923	-0.221316	NaN	0.352188	0.390764	NaN	-0.0371055	-0.0184906	NaN	0.160228	-0.0354167	NaN	-0.376631	-0.172493	S	3	+	Casein kinase II substrate motif;ERK1,2 kinase substrate motif;G protein-coupled receptor kinase 1 substrate motif;Growth associated histone HI kinase substrate motif;GSK-3, ERK1, ERK2, CDK5 substrate motif;PKA kinase substrate motif;PKC kinase substrate motif;WW domain binding motif	ribosomal large subunit assembly [GO:0000027]";"cytoplasmic translation [GO:0002181]	cytosolic ribosome [GO:0022626]";"cytosolic large ribosomal subunit [GO:0022625]	structural constituent of ribosome [GO:0003735]	1	3.87251e-05	135.08	115.33	132.86	-0.085295	1564300000	1085400000	478890000	178	2.34706	0.0470347	0.853901	0.336968	1.60394	0.646038	0.860918	0.246764	0.171869	0.049943	3.49063	1.00317	0.287025	2.9682	0.596095	2.6006	0.196821	0.171869
NaN	0.13014	0.193743	0.19131	0.282252	0.180494	-0.00918071	NaN	-0.0287636	NaN	-0.0107737	-0.0241204	-0.129734	NaN	0.00633396	T	2	+	MDC1 BRCT domain binding motif;Plk1 PBD domain binding motif	regulation of DNA replication [GO:0006275]";"maintenance of mitotic sister chromatid cohesion [GO:0034088]	chromosome, centromeric region [GO:0000775];Ctf18 RFC-like complex [GO:0031390];nucleoplasm [GO:0005654]";"chromatin [GO:0000785]		0.969034	1.40959e-27	210.71	195.98	150.49	0.038502	41995000000	30954000000	11041000000	117	2.34472	0.0471635	0.233744	0.0442529	1.62546	0.279718	0.22359	0.0427278	1.01463	0.223641	3.09743	1.50474	-0.179388	0.486122	0.056077	1.4921	-0.180914	1.01463
-0.341106	-0.462933	-0.644719	-0.116357	-0.132622	-0.25022	-0.0148892	-0.122358	-0.0819651	0.00273846	-0.10085	0.101473	-0.190158	-0.441016	-0.123066	S	2	+	Casein kinase II substrate motif;G protein-coupled receptor kinase 1 substrate motif	border follicle cell migration [GO:0007298];cellular response to mechanical stimulus [GO:0071260];compartment boundary maintenance [GO:0060289];cuticle pattern formation [GO:0035017];dorsal closure [GO:0007391];dorsal closure, amnioserosa morphology change [GO:0046664];dorsal closure, leading edge cell differentiation [GO:0046663];dorsal closure, spreading of leading edge cells [GO:0007395];estab…	apical cortex [GO:0045179];cell cortex [GO:0005938];cell leading edge [GO:0031252];cell-cell contact zone [GO:0044291];cilium [GO:0005929];cleavage furrow [GO:0032154];cytoskeleton [GO:0005856];cytosol [GO:0005829];myosin complex [GO:0016459];myosin II complex [GO:0016460];unconventional myosin complex [GO:0016461];Z disc [GO:0030018]";"actomyosin contractile ring [GO:0005826];myosin complex [GO:…	ATP binding [GO:0005524];ATPase activity [GO:0016887];ATPase activity, coupled [GO:0042623];calmodulin binding [GO:0005516];identical protein binding [GO:0042802];motor activity [GO:0003774];motor activity [GO:0003774]";myosin light chain binding [GO:0032027]";"actin binding [GO:0003779];"actin filament binding [GO:0051015]	1	8.43566e-11	157.58	132.65	131.4	-0.33803	2292400000	1704000000	588410000	2	2.33721	0.0477931	1.04974	0.252534	0.331872	0.0850137	0.811381	0.178343	0.818797	-0.231506	3.01179	1.99049	0.48404	1.49815	0.31652	1.92469	0.409848	0.818797
0.337504	0.531879	0.544713	0.219303	0.503997	0.40984	0.30696	0.459319	0.368788	-0.0469632	0.0722397	0.049282	0.272318	0.463733	0.537395	S	2	+	ERK1,2 kinase substrate motif;Growth associated histone HI kinase substrate motif;GSK-3, ERK1, ERK2, CDK5 substrate motif;WW domain binding motif	regulation of embryonic development [GO:0045995];response to bacterium [GO:0009617];sex differentiation [GO:0007548]";"embryo development ending in birth or egg hatching [GO:0009792]	P granule [GO:0043186]";"extracellular region [GO:0005576];extracellular region [GO:0005576]	carboxylic ester hydrolase activity [GO:0052689]	1	2.29853e-11	170.92	141.57	134.51	1.0599	48852000000	33498000000	15354000000	404	2.33697	0.0476562	1.99602	-0.399629	0.151596	-0.0467688	0.195684	-0.0461264	0.171112	0.0468832	2.51441	2.37054	-0.446512	0.364625	-0.093652	0.506843	-0.0930096	0.171112
-0.12038	-0.47121	-0.36615	0.154288	0.391768	-0.143272	0.393368	0.500225	0.233888	0.209099	0.125726	0.0961465	0.0540844	0.100561	0.121811	S	2	+	Casein kinase II substrate motif;G protein-coupled receptor kinase 1 substrate motif;MDC1 BRCT domain binding motif;PKA kinase substrate motif;PKC kinase substrate motif;Plk1 PBD domain binding motif	positive regulation of lipid transport [GO:0032370];sterol transport [GO:0015918]";"acylglycerol transport [GO:0034196]	extracellular space [GO:0005615];plasma membrane [GO:0005886]";"basal part of cell [GO:0045178]	lipoprotein particle receptor binding [GO:0070325]";"lipid transporter activity [GO:0005319]	0.700791	2.54288e-103	313.65	300.04	272.84	1.3036	6130400000	4420500000	1709900000	114	2.3345	0.0477882	0.584925	0.0515047	0.0965584	0.0421088	1.62315	0.283675	1.75086	-0.411399	4.05549	1.87543	0.462904	1.14389	0.453508	2.23411	0.695074	1.75086
NaN	-0.173577	-0.198257	NaN	-0.09353	-0.105641	0.0451514	-0.0370965	-0.0205986	NaN	0.0324821	-0.0171778	NaN	-0.0626035	-0.0141768	S	2	+	b-Adrenergic Receptor kinase substrate motif;BARD1 BRCT domain binding motif;Casein kinase I substrate motif;Casein kinase II substrate motif		cytosol [GO:0005829]		1	5.00287e-06	122.33	109.91	105.03	0.98065	14684000000	10687000000	3997200000	6	2.33423	0.047677	0.500891	0.0460423	0.873646	-0.0611953	0.371951	0.034209	1.4908	-0.147527	3.23729	1.70098	0.193569	1.61216	0.0863315	1.90287	0.181736	1.4908
0.356561	1.49963	1.48754	1.35498	1.30077	1.3065	0.20996	0.351612	0.387407	-0.489931	-0.365419	-0.294236	-0.292584	0.898402	0.887369	S	3	+	Cdc2 kinase substrate motif;CDK kinase substrate motif;CDK1,2,4,6 kinase substrate motif;ERK1,2 kinase substrate motif;G protein-coupled receptor kinase 1 substrate motif;GSK3 kinase substrate motif;GSK-3, ERK1, ERK2, CDK5 substrate motif;WW domain binding motif	cell aging [GO:0007569];cellularization [GO:0007349];morphogenesis of embryonic epithelium [GO:0016331];nucleus organization [GO:0006997]";"adult locomotory behavior [GO:0008344]	nuclear inner membrane [GO:0005637]		1	2.31137e-85	253.87	249.29	90.593	0.65095	9706700000	6888000000	2818700000	296	2.33392	0.0475728	1.03617	-0.880924	0.974957	0.823017	0.172085	-0.181403	0.490872	0.616847	2.67408	1.75866	-1.49777	0.210613	0.20617	0.976996	-0.798249	0.490872
NaN	-0.568451	-0.566532	NaN	0.248338	0.467071	NaN	-0.0897235	0.23344	NaN	0.207232	0.345452	NaN	-0.253089	-0.415122	S	3	+	Casein kinase I substrate motif;Casein kinase II substrate motif	signal peptide processing [GO:0006465]";"protein targeting to ER [GO:0045047]	organelle membrane [GO:0031090];signal peptidase complex [GO:0005787]";"integral component of endoplasmic reticulum membrane [GO:0030176]	peptidase activity [GO:0008233]	0.926343	8.2646e-54	227.74	224.86	200.85	-0.26601	2290900000	1800100000	490780000	83	2.33344	0.0474691	1.53598	0.610447	1.43658	0.691809	0.813085	0.405963	0.989914	-0.233386	4.77556	2.1777	0.843834	1.86365	0.925196	1.23403	0.63935	0.989914
0.34177	0.282463	0.279648	0.0183951	0.00533179	0.0377041	0.242148	0.198193	0.101691	0.0311026	-0.0861618	-0.00155837	0.159546	0.0928164	-0.144035	S	2	+	b-Adrenergic Receptor kinase substrate motif;Casein kinase II substrate motif;G protein-coupled receptor kinase 1 substrate motif;PKA kinase substrate motif	RNA interference [GO:0016246]";"heterochromatin organization [GO:0070828]	cytosol [GO:0005829];nucleus [GO:0005634];polytene chromosome [GO:0005700];polytene chromosome puff [GO:0005703];RISC complex [GO:0016442]";"cytoplasm [GO:0005737]	mRNA binding [GO:0003729]	0.999995	6.70606e-287	449.6	427.81	342.46	0.44276	28043000000	19877000000	8166100000	277	2.33234	0.0474031	0.217147	-0.0549814	0.0584283	-0.0156319	0.646568	0.144568	1.31672	0.265185	2.23886	2.86311	-0.320166	3.63803	-0.280817	1.22738	-0.120617	1.31672
0.897812	1.54092	1.19306	0.397915	-0.392552	-0.55959	-0.144595	0.190552	0.0571383	-0.0521135	0.437955	0.040992	0.475619	NaN	0.9883	S	2	+	BARD1 BRCT domain binding motif;Casein kinase I substrate motif;Casein kinase II substrate motif;G protein-coupled receptor kinase 1 substrate motif;GSK3 kinase substrate motif	meiotic chromosome condensation [GO:0010032];mitotic chromosome condensation [GO:0007076];regulation of histone H3-K4 methylation [GO:0051569];regulation of histone H3-K9 acetylation [GO:2000615];regulation of histone H3-K9 methylation [GO:0051570]";"chromosome organization [GO:0051276]	polytene chromosome [GO:0005700]";"nucleus [GO:0005634]	kinesin binding [GO:0019894]	1	3.29434e-136	361.22	333.51	247.02	2.3028	13267000000	9879800000	3387100000	77	2.32801	0.0476074	0.924691	-0.589682	0.918164	-0.916702	1.25617	-0.697594	0.664439	0.478638	3.76347	1.95565	-1.06832	1.79204	-1.39534	2.30323	-1.17623	0.664439
-0.332274	0.0848507	NaN	-0.195155	-0.314589	-0.521168	-0.410177	-0.594617	-0.679572	-0.216219	0.125585	0.17621	NaN	0.406351	0.312781	S	3	+	Casein kinase I substrate motif;Cdc2 kinase substrate motif;CDK kinase substrate motif;CDK1,2,4,6 kinase substrate motif;ERK1,2 kinase substrate motif;G protein-coupled receptor kinase 1 substrate motif;GSK-3, ERK1, ERK2, CDK5 substrate motif;WW domain binding motif	cleavage furrow formation [GO:0036089];cleavage furrow ingression [GO:0036090];germ cell migration [GO:0008354];membrane organization [GO:0061024];protein localization [GO:0008104]";"cellularization [GO:0007349]	cleavage furrow [GO:0032154]";"cellularization cleavage furrow invagination front [GO:0110071]		1	2.75336e-09	104.38	101.17	92.147	0.37826	1370500000	1007300000	363170000	327	2.32693	0.0477676	0.869569	-0.331041	1.92768	-0.703204	2.46531	-0.921022	0.817627	-0.483278	6.08019	0.265314	0.152237	0.458308	-0.219926	0.998598	-0.437744	0.817627
-0.288139	-0.452528	-0.390784	-0.366708	-0.176981	-0.180219	0.0909753	-0.0834477	-0.151476	0.131058	0.0149663	0.0770008	0.182191	0.258256	-0.149507	S	2	+	b-Adrenergic Receptor kinase substrate motif;Casein kinase II substrate motif	negative regulation of BMP signaling pathway [GO:0030514];nuclear envelope organization [GO:0006998]";"multicellular organism development [GO:0007275]	endomembrane system [GO:0012505];integral component of nuclear inner membrane [GO:0005639];nucleoplasm [GO:0005654];spindle pole [GO:0000922]";"cytoplasm [GO:0005737]	nucleic acid binding [GO:0003676]	0.999998	1.37209e-15	173.06	155.39	164.06	1.0312	4906000000	3504200000	1401800000	5	2.32664	0.0476463	0.0605721	-0.0226383	1.13625	-0.338283	0.428793	-0.144963	1.61835	-0.47413	3.24396	2.81868	0.451492	0.794886	0.135848	1.71814	0.329168	1.61835
-0.516411	-0.733168	-0.597484	-0.169025	-0.153749	-0.266567	-0.439068	-0.479478	-0.316334	-0.330107	-0.18602	-0.22253	-0.420344	-0.211331	-0.526099	S	2	+	Casein kinase II substrate motif;ERK1,2 kinase substrate motif;G protein-coupled receptor kinase 1 substrate motif;GSK3 kinase substrate motif;GSK-3, ERK1, ERK2, CDK5 substrate motif;PKA kinase substrate motif;PKC kinase substrate motif;WW domain binding motif	ecdysone receptor-mediated signaling pathway [GO:0035076];nucleosome mobilization [GO:0042766];phosphate-containing compound metabolic process [GO:0006796];positive regulation of Notch signaling pathway [GO:0045747];regulation of hemocyte proliferation [GO:0035206];transcription, DNA-templated [GO:0006351]";"chromatin remodeling [GO:0006338];phosphate-containing compound metabolic process [GO:000…	neuron projection [GO:0043005];nucleus [GO:0005634];NURF complex [GO:0016589];vacuole [GO:0005773]";"cytoplasm [GO:0005737];cytoplasm [GO:0005737]	magnesium ion binding [GO:0000287]";"inorganic diphosphatase activity [GO:0004427]	0.999775	2.82515e-05	117.77	106.2	90.689	-0.6737	6033600000	4763900000	1269800000	14	2.32401	0.0477021	0.614378	0.139706	0.892206	0.189478	0.0871734	-0.0257021	0.960273	-0.229763	2.55403	2.07034	0.369469	2.35375	0.419241	1.19851	0.204061	0.960273
-0.332274	0.191184	NaN	-0.195155	-0.487965	-0.150395	-0.388693	-0.4591	-0.648022	0.214622	0.080236	0.17621	NaN	0.32008	0.312781	S	3	+	Cdc2 kinase substrate motif;CDK kinase substrate motif;CDK1,2,4,6 kinase substrate motif;ERK1,2 kinase substrate motif;G protein-coupled receptor kinase 1 substrate motif;GSK-3, ERK1, ERK2, CDK5 substrate motif;WW domain binding motif	cleavage furrow formation [GO:0036089];cleavage furrow ingression [GO:0036090];germ cell migration [GO:0008354];membrane organization [GO:0061024];protein localization [GO:0008104]";"cellularization [GO:0007349]	cleavage furrow [GO:0032154]";"cellularization cleavage furrow invagination front [GO:0110071]		1	2.75336e-09	102.51	78.977	92.147	0.37826	1096000000	817130000	278920000	335	2.32322	0.0477333	1.26839	-0.159408	1.64841	-0.594269	2.41323	-0.815036	0.556922	-0.386976	5.88695	0.466646	0.227568	0.348551	-0.207293	0.836044	-0.42806	0.556922
NaN	-0.219757	-0.184638	NaN	-0.0341997	0.081476	NaN	-1.01467	-0.795283	NaN	NaN	-0.621977	NaN	-0.465022	-0.270417	S	2	+	14-3-3 domain binding motif;Akt kinase substrate motif;AMP-activated protein kinase 2 substrate motif;Calmodulin-dependent protein kinase II substrate motif;Casein kinase II substrate motif;MAPKAPK1 kinase substrate motif;p70 Ribosomal S6 kinase substrate motif;Phosphorylase kinase substrate motif;PKA kinase substrate motif;PKC kinase substrate motif;ZIP kinase substrate motif	mitotic chromosome condensation [GO:0007076];mitotic cytokinesis [GO:0000281]";"establishment of mitotic spindle localization [GO:0040001]	mitotic spindle [GO:0072686];nucleolus [GO:0005730];nucleus [GO:0005634]";"microtubule [GO:0005874]	microtubule binding [GO:0008017]	0.999975	0.000673305	122.77	31.107	103.18	-0.93758	1280100000	1036700000	243360000	540	2.32119	0.0477704	-4.34294e-08	0	1.12821	0.391358	1.17341	-0.537259	0.626911	0.165522	2.92853	0	-0.419779	1.18872	0.225836	1.61819	-0.702781	0.626911
NaN	NaN	0.422448	NaN	0.168847	-0.365119	NaN	-0.654259	-0.633143	NaN	-0.383955	-0.594884	NaN	-2.02968	-1.77705	S	2	+	Casein kinase II substrate motif;Cdc2 kinase substrate motif;CDK kinase substrate motif;CDK1,2,4,6 kinase substrate motif;ERK1,2 kinase substrate motif;G protein-coupled receptor kinase 1 substrate motif;GSK-3, ERK1, ERK2, CDK5 substrate motif;PKA kinase substrate motif;PKC kinase substrate motif;WW domain binding motif	extracellular matrix organization [GO:0030198];liquid clearance, open tracheal system [GO:0035002];regulation of tube length, open tracheal system [GO:0035159]";"endocytosis [GO:0006897]	early endosome [GO:0005769];integral component of membrane [GO:0016021];plasma membrane [GO:0005886]";"cytoplasmic vesicle [GO:0031410]		0.999759	8.23554e-39	254.38	178.59	241.41	-0.022953	831270000	615700000	215570000	23	2.31828	0.0479036	1.87696	1.41394	1.5894	1.80523	2.00111	1.25966	-4.34294e-08	0	5.46747	0	-0.911868	0	-0.520584	0	-1.06615	0
-0.185423	-0.232785	-0.367538	-0.102726	-0.238178	-0.0686765	-0.0508972	-0.116157	-0.175243	0.01397	0.0707552	0.0255706	-0.132642	-0.150105	-0.0867716	S	2	+	Casein kinase II substrate motif;MAPKAPK2 kinase substrate motif;PKA kinase substrate motif;PKC kinase substrate motif;Pyruvate dehydrogenase kinase substrate motif	DNA repair [GO:0006281];DNA replication [GO:0006260]";"dendrite morphogenesis [GO:0048813]	nucleus [GO:0005634]";"DNA replication factor C complex [GO:0005663]	DNA binding [GO:0003677];DNA clamp loader activity [GO:0003689]";"ATP binding [GO:0005524]	0.999999	7.73196e-109	304.29	299.98	152.38	3.0344	193530000000	143920000000	49609000000	62	2.31392	0.0482102	2.4738	0.159938	0.0859561	-0.0133541	0.0788349	0.00907372	1.13025	-0.138742	3.76884	2.19147	0.29868	0.767548	0.125388	1.06365	0.147816	1.13025
0.0594738	0.233652	0.160637	-0.12987	-0.116585	-0.071669	-0.170084	-0.00621894	-0.103587	-0.153821	-0.0722417	-0.102509	-0.131707	0.0137478	0.0241091	S	2	+	ERK1,2 kinase substrate motif;GSK-3, ERK1, ERK2, CDK5 substrate motif;WW domain binding motif	temperature compensation of the circadian clock [GO:0010378]";"entrainment of circadian clock [GO:0009649]			1	1.91197e-16	170.23	148.49	146.17	0.57799	34697000000	25649000000	9048300000	1016	2.31275	0.0481796	0.633626	-0.0782403	0.632006	-0.0747579	0.37563	-0.0620131	1.20361	0.182538	2.84487	2.02172	-0.260778	2.06654	-0.257296	1.6135	-0.244551	1.20361
-0.215621	0.0881504	-0.236929	-0.468017	-0.557442	-0.477282	-0.316413	-0.145041	-0.0693741	-0.0653393	-0.163134	-0.0202537	-0.257744	-0.306408	-0.32209	S	2	+	b-Adrenergic Receptor kinase substrate motif;Casein kinase II substrate motif;PKA kinase substrate motif;PKC kinase substrate motif	cell proliferation involved in compound eye morphogenesis [GO:0035736];ubiquitin-dependent protein catabolic process [GO:0006511]";"apoptotic process [GO:0006915]	nucleus [GO:0005634]	ubiquitin-protein transferase activity [GO:0004842];zinc ion binding [GO:0008270]";"nucleic acid binding [GO:0003676]	1	3.84106e-68	293.98	253.51	163.8	-2.9779	14736000000	11793000000	2942900000	362	2.30435	0.0488239	1.99181	0.212505	2.40534	-0.2055	0.716332	0.118471	0.748172	0.173948	5.86165	0.124702	0.0385574	1.59948	-0.379447	0.163119	-0.0554761	0.748172
-0.106996	0.13373	0.123979	-0.237635	-0.392328	-0.365874	-0.225401	-0.414492	-0.445431	-0.862158	-0.584194	-0.631398	-0.532448	-0.0760267	0.0216874	S	2	+	Casein kinase II substrate motif;ERK1,2 kinase substrate motif;Growth associated histone HI kinase substrate motif;GSK-3, ERK1, ERK2, CDK5 substrate motif;MAPKAPK2 kinase substrate motif;WW domain binding motif	cell aging [GO:0007569];cellularization [GO:0007349];morphogenesis of embryonic epithelium [GO:0016331];nucleus organization [GO:0006997]";"adult locomotory behavior [GO:0008344]	nuclear inner membrane [GO:0005637]		1	4.02524e-63	284.26	265.28	268.38	-0.19004	155820000000	125200000000	30616000000	253	2.30185	0.0489881	1.22151	-0.496988	0.314412	-0.13635	0.379087	-0.166179	0.583134	0.245833	2.49814	2.50868	-0.742821	1.84678	-0.382183	1.77173	-0.412012	0.583134
-0.0437168	-0.458437	-0.261782	0.434253	0.215744	0.188527	-0.0956725	-0.47397	-0.599558	-0.484448	-0.381522	-0.296264	-0.270822	-0.0885418	-0.00368956	S	3	+	Casein kinase II substrate motif;ERK1,2 kinase substrate motif;GSK-3, ERK1, ERK2, CDK5 substrate motif;WW domain binding motif	germ cell development [GO:0007281];mRNA pseudouridine synthesis [GO:1990481];pseudouridine synthesis [GO:0001522];ribosome biogenesis [GO:0042254];rRNA processing [GO:0006364];rRNA pseudouridine synthesis [GO:0031118];snRNA pseudouridine synthesis [GO:0031120];wing disc development [GO:0035220]";"box H/ACA snoRNA 3'-end processing [GO:0000495];RNA processing [GO:0006396]	nucleolus [GO:0005730]";"box H/ACA snoRNP complex [GO:0031429]	RNA binding [GO:0003723];RNA binding [GO:0003723]";tRNA pseudouridine synthase activity [GO:0106029]";"pseudouridine synthase activity [GO:0009982];"pseudouridylate synthase activity [GO:0004730]	0.999999	1.96342e-135	360.53	303.71	214.05	0.072392	64248000000	52065000000	12183000000	428	2.2945	0.0495727	1.30344	-0.266394	1.64963	0.400526	0.719918	-0.268716	0.393528	-0.133627	4.06651	0.43186	-0.132766	1.6965	0.534154	0.281759	-0.135088	0.393528
-0.482049	-0.705806	-0.843228	-0.282822	-0.587255	-0.219034	-0.460461	-0.444708	-0.371568	-0.0996654	-0.202595	-0.0778778	-0.174128	-0.296902	-0.335601	S	3	+	ERK1,2 kinase substrate motif;Growth associated histone HI kinase substrate motif;GSK-3, ERK1, ERK2, CDK5 substrate motif;PAK2 kinase substrate motif;PKA kinase substrate motif;PKC kinase substrate motif;WW domain binding motif	glutathione metabolic process [GO:0006749];negative regulation of innate immune response [GO:0045824];oxidation-reduction process [GO:0055114]";"defense response to Gram-negative bacterium [GO:0050829]	mitochondrion [GO:0005739]";"cytoplasm [GO:0005737]	glutathione dehydrogenase (ascorbate) activity [GO:0045174];glutathione transferase activity [GO:0004364];protein homodimerization activity [GO:0042803];transferase activity, transferring sulfur-containing groups [GO:0016782]";"glutathione binding [GO:0043295]	1	1.21194e-14	161.3	142.88	85.61	0.32636	14428000000	10956000000	3472000000	12	2.29083	0.0497396	1.07728	0.142164	0.311038	-0.09416	1.31405	-0.156702	1.61161	-0.408151	4.31397	2.09795	0.550315	0.948683	0.313991	1.08699	0.251449	1.61161
-0.373535	-0.716252	-0.547742	0.213937	0.287078	-0.0508856	0.0357665	0.305221	-0.340569	0.17076	0.13209	0.00787722	-0.204323	-0.401988	-0.343175	S	2	+	Casein kinase II substrate motif;Pyruvate dehydrogenase kinase substrate motif	defense response to Gram-negative bacterium [GO:0050829];DNA repair [GO:0006281];positive regulation of innate immune response [GO:0045089]";"chromatin organization [GO:0006325]	nucleus [GO:0005634]	DNA binding [GO:0003677];helicase activity [GO:0004386]";"ATP binding [GO:0005524]	1	0	474.41	455.87	284.74	-1.4378	11640000000	8799700000	2840400000	154	2.29036	0.0496283	2.27145	0.420071	1.77306	0.466539	0.740147	0.316635	0.932377	-0.229348	5.71704	2.37847	0.649419	2.08854	0.695886	1.21134	0.545983	0.932377
-0.182824	-0.426948	-0.37345	0.217059	0.313909	0.0952286	-0.0864143	-0.228037	-0.244502	-0.166548	-0.0191279	-0.0977411	-0.343787	0.0313253	-0.0582964	S	3	+	b-Adrenergic Receptor kinase substrate motif;Casein kinase II substrate motif;ERK1,2 kinase substrate motif;G protein-coupled receptor kinase 1 substrate motif;GSK3 kinase substrate motif;GSK-3, ERK1, ERK2, CDK5 substrate motif;WW domain binding motif	GPI anchor biosynthetic process [GO:0006506];rhabdomere membrane biogenesis [GO:0045313]";"attachment of GPI anchor to protein [GO:0016255]	GPI-anchor transamidase complex [GO:0042765]";"endomembrane system [GO:0012505]		0.999956	3.13769e-172	368.77	364.07	351.77	0.34646	20226000000	15052000000	5174700000	660	2.28895	0.0496059	0.0854068	0.0291139	1.20516	0.332318	0.194616	-0.0627312	0.687051	-0.204154	2.17224	1.2802	0.233268	2.27532	0.536473	0.723212	0.141423	0.687051
-0.671273	-0.999917	-1.18144	-0.463869	-0.593401	-0.883876	-0.565447	-0.537836	-0.332759	-0.110431	-0.0738626	-0.30591	-0.400045	-0.641472	-0.332491	S	2	+	BARD1 BRCT domain binding motif;Casein kinase II substrate motif;G protein-coupled receptor kinase 1 substrate motif;MDC1 BRCT domain binding motif;Plk1 PBD domain binding motif	chromosome organization [GO:0051276];DNA repair [GO:0006281];DNA replication-independent nucleosome assembly [GO:0006336];glial cell migration [GO:0008347];heterochromatin organization involved in chromatin silencing [GO:0070868];intrinsic apoptotic signaling pathway [GO:0097193];nervous system development [GO:0007399];regulation of JNK cascade [GO:0046328]";"axon guidance [GO:0007411]	chromosome, centromeric region [GO:0000775];germinal vesicle [GO:0042585];heterochromatin [GO:0000792];nucleus [GO:0005634];polytene chromosome [GO:0005700]";"beta-heterochromatin [GO:0005722]	ATP binding [GO:0005524];DNA binding [GO:0003677];helicase activity [GO:0004386]";"ATPase activity [GO:0016887]	1	2.07337e-38	224.89	216.79	173.98	-0.28439	11231000000	8631500000	2599600000	127	2.28855	0.049566	1.17138	0.294601	0.53576	-0.189046	0.060188	-0.0206779	1.30947	-0.492873	3.07679	2.04732	0.787474	0.715048	0.303827	1.32839	0.472195	1.30947
0.232906	NaN	0.250719	NaN	NaN	0.273098	-0.167312	NaN	-0.125652	-0.226578	-0.0797372	-0.075292	NaN	NaN	NaN	T	2	+	G protein-coupled receptor kinase 1 substrate motif;PKA kinase substrate motif;PKC kinase substrate motif	DNA amplification [GO:0006277];DNA replication initiation [GO:0006270];mitotic cell cycle [GO:0000278];mitotic DNA replication checkpoint [GO:0033314]";"cell proliferation [GO:0008283]	nuclear origin of replication recognition complex [GO:0005664]";"nuclear chromosome, telomeric region [GO:0000784]	chromatin binding [GO:0003682];DNA replication origin binding [GO:0003688];metal ion binding [GO:0046872]";"ATP binding [GO:0005524]	0.826482	7.46565e-148	357.1	346.12	174.76	0.082776	2029300000	1295600000	733630000	296	2.28103	0.0501988	-4.34294e-08	0	-4.34294e-08	0	-4.34294e-08	0	-4.34294e-08	0	0	1.9746	-0.369015	0	0.0312854	2.47022	-0.388295	0
-0.18037	-0.190598	-0.223164	0.0934022	0.288997	0.11536	-0.32202	-0.159475	-0.241019	-0.243623	-0.0155479	-0.0784329	-0.219352	0.0608646	-0.065253	S	2	+	b-Adrenergic Receptor kinase substrate motif;Casein kinase II substrate motif;ERK1,2 kinase substrate motif;G protein-coupled receptor kinase 1 substrate motif;GSK3 kinase substrate motif;GSK-3, ERK1, ERK2, CDK5 substrate motif;WW domain binding motif	positive regulation of Wnt signaling pathway [GO:0030177]";"negative regulation of transcription by RNA polymerase II [GO:0000122];negative regulation of transcription by RNA polymerase II [GO:0000122]	nucleus [GO:0005634]	DNA-binding transcription factor activity [GO:0003700]	0.982082	1.16099e-10	155.26	142.91	136.26	0.043656	4917800000	3586300000	1331400000	218	2.27863	0.0502741	0.132007	-0.0379545	1.10939	0.2405	0.822623	-0.166258	0.684402	-0.123464	2.74842	0.546175	0.0855096	2.34595	0.363964	0.367683	-0.0427936	0.684402
0.0754272	-0.143448	-0.00765897	0.137033	0.0678845	0.169703	-0.0805081	-0.194768	-0.109307	-0.0972998	-0.111803	-0.146621	-0.113665	-0.01715	-0.0408515	S	2	+	Cdc2 kinase substrate motif;CDK kinase substrate motif;CDK1,2,4,6 kinase substrate motif;ERK1,2 kinase substrate motif;Growth associated histone HI kinase substrate motif;GSK-3, ERK1, ERK2, CDK5 substrate motif;MDC1 BRCT domain binding motif;PKA kinase substrate motif;Plk1 PBD domain binding motif;WW domain binding motif	proteolysis [GO:0006508]";"protein homooligomerization [GO:0051260]	mitochondrion [GO:0005739]";"cytoplasm [GO:0005737]	exopeptidase activity [GO:0008238];identical protein binding [GO:0042802];serine-type endopeptidase activity [GO:0004252];tripeptidyl-peptidase activity [GO:0008240]";"aminopeptidase activity [GO:0004177];"serine-type endopeptidase activity [GO:0004252];serine-type endopeptidase activity [GO:0004252]	0.999904	5.79368e-13	171.63	120.18	171.63	0.55948	6049400000	4468600000	1580800000	1054	2.2764	0.0503837	0.878598	-0.0613525	1.91865	0.182095	0.722417	-0.0709722	0.172809	0.0319955	3.69248	0.644091	-0.093348	0.99865	0.1501	0.641672	-0.102968	0.172809
-0.0432342	-0.132036	-0.0278002	0.438148	0.162472	0.360376	0.0691453	-0.0883082	-0.139423	0.198228	0.287991	0.245452	0.0956486	-0.304526	-0.0455464	S	2	+	b-Adrenergic Receptor kinase substrate motif;Casein kinase II substrate motif	mRNA splicing, via spliceosome [GO:0000398]	nuclear speck [GO:0016607];spliceosomal complex [GO:0005681];U2-type catalytic step 1 spliceosome [GO:0071006]";"catalytic step 2 spliceosome [GO:0071013]	RNA binding [GO:0003723]	1	4.22814e-168	370.13	363.82	289.7	-0.32096	24485000000	16688000000	7797800000	1111	2.27501	0.0503536	1.28431	0.328698	1.32564	0.40514	0.0851855	0.0319458	0.0482491	0.0171177	2.74338	2.77136	0.311581	1.93099	0.388022	0.0736276	0.0148281	0.0482491
-0.0973471	-0.44082	-0.137645	-0.120822	0.184088	0.178834	0.073519	0.210268	0.163246	0.162121	0.15493	0.174906	-0.129397	-0.19447	-0.260158	S	2	+	b-Adrenergic Receptor kinase substrate motif;BARD1 BRCT domain binding motif;Casein kinase II substrate motif;G protein-coupled receptor kinase 1 substrate motif	female meiotic nuclear division [GO:0007143];microtubule anchoring at centrosome [GO:0034454];spermatogenesis [GO:0007283]";"DNA-templated transcription, termination [GO:0006353]	nucleus [GO:0005634]";"cytoplasm [GO:0005737]	DNA binding [GO:0003677];DNA-dependent ATPase activity [GO:0008094];helicase activity [GO:0004386]";"ATP binding [GO:0005524]	1	5.81056e-104	302.36	302.36	287.68	-0.05869	226720000000	159030000000	67690000000	110	2.27383	0.0503873	3.14463	0.358661	1.2027	0.275375	2.47343	0.343686	0.0952885	-0.0305959	6.91605	1.63733	0.389257	0.968347	0.305971	1.49854	0.374282	0.0952885
0.199811	0.430927	0.434185	-0.170884	-0.364772	-0.331333	0.0399279	0.168959	0.372381	0.165344	-0.0751788	-0.0272822	0.464635	0.383621	-0.00926291	S	4	+	14-3-3 domain binding motif;Calmodulin-dependent protein kinase II substrate motif;Casein kinase II substrate motif;DNA dependent Protein kinase substrate motif;ERK1,2 kinase substrate motif;GSK-3, ERK1, ERK2, CDK5 substrate motif;PKA kinase substrate motif;PKC kinase substrate motif;Pyruvate dehydrogenase kinase substrate motif;WW domain binding motif				1	4.80764e-55	212.21	210.36	180.75	-0.47779	4797500000	3386500000	1411000000	71	2.2664	0.0510605	0.722799	-0.258704	1.64159	-0.568661	0.187077	-0.0859082	0.172028	0.0753101	2.72349	1.45164	-0.334014	2.55694	-0.643971	0.579203	-0.161218	0.172028
NaN	-0.428682	-0.506018	NaN	-0.378071	-0.145857	NaN	-0.641857	-0.696289	NaN	0.129247	0.329221	NaN	-0.326622	NaN	S	2	+	Casein kinase II substrate motif;ERK1,2 kinase substrate motif;Growth associated histone HI kinase substrate motif;GSK-3, ERK1, ERK2, CDK5 substrate motif;PKA kinase substrate motif;PKC kinase substrate motif;WW domain binding motif	negative regulation of proteasomal ubiquitin-dependent protein catabolic process [GO:0032435];positive regulation of canonical Wnt signaling pathway [GO:0090263];protein deubiquitination [GO:0016579];protein stabilization [GO:0050821];regulation of chromatin silencing [GO:0031935];regulation of protein stability [GO:0031647];ubiquitin-dependent protein catabolic process [GO:0006511]";"compound ey…	cytosol [GO:0005829];nucleus [GO:0005634]";"cytoplasm [GO:0005737]	thiol-dependent ubiquitin-specific protease activity [GO:0004843]";"cysteine-type endopeptidase activity [GO:0004197]	0.999861	0.000753602	112.44	45.324	112.44	0.048207	1404100000	1062200000	341910000	126	2.26118	0.0515517	-4.34294e-08	0	-4.34294e-08	0	-4.34294e-08	0	-4.34294e-08	0	0	1.64063	0.696584	0.628397	0.205386	1.29416	-0.201723	0
NaN	1.2837	1.4509	-2.30493	-0.779898	-0.802999	-0.650499	-0.368313	-0.468333	-0.685802	0.273056	-0.0729111	NaN	-0.499747	-0.48808	S	2	+	Casein kinase I substrate motif;Cdc2 kinase substrate motif;CDK kinase substrate motif;CDK1,2,4,6 kinase substrate motif;DNA dependent Protein kinase substrate motif;ERK1,2 kinase substrate motif;G protein-coupled receptor kinase 1 substrate motif;GSK-3, ERK1, ERK2, CDK5 substrate motif;PKA kinase substrate motif;PKC kinase substrate motif;WW domain binding motif	gene silencing [GO:0016458];heterochromatin assembly [GO:0031507];mitotic chromosome condensation [GO:0007076]";"chromosome organization [GO:0051276]	condensed chromosome [GO:0000793];heterochromatin [GO:0000792];nuclear heterochromatin [GO:0005720];polytene chromosome [GO:0005700]";"chromosome, centromeric region [GO:0000775]	DNA binding [GO:0003677]	1	1.28181e-17	181.87	162.26	136.1	0.54921	1878300000	1425100000	453220000	792	2.26117	0.051404	0.369954	0.332028	0.514369	-0.802029	0.0054211	-0.00180116	2.69436	1.86121	3.58411	1.59856	-1.52919	1.57252	-2.66324	3.19889	-1.86302	2.69436
0.475006	0.954605	0.974551	0.525521	0.779925	0.593507	0.601929	0.742282	0.621905	-0.22465	-0.107005	-0.17109	-0.151927	0.642659	0.607195	S	2	+	ERK1,2 kinase substrate motif;G protein-coupled receptor kinase 1 substrate motif;GSK3 kinase substrate motif;GSK-3, ERK1, ERK2, CDK5 substrate motif;WW domain binding motif	translational elongation [GO:0006414]	eukaryotic translation elongation factor 1 complex [GO:0005853]	translation elongation factor activity [GO:0003746]	1	2.26339e-67	285.87	248.88	190.44	-0.10241	23149000000	15468000000	7681200000	37	2.26027	0.0513429	0.955561	-0.533557	0.421575	0.267008	0.47798	0.289396	0.641626	0.435412	2.49674	2.35962	-0.968969	0.394942	-0.168403	0.360009	-0.146015	0.641626
NaN	-0.085504	0.324977	NaN	0.316355	0.186648	-0.523442	-0.557416	-0.674965	NaN	0.338071	0.266528	NaN	0.00887633	-0.365623	S	3	+	Casein kinase II substrate motif;Cdc2 kinase substrate motif;CDK kinase substrate motif;CDK1,2,4,6 kinase substrate motif;ERK1,2 kinase substrate motif;Growth associated histone HI kinase substrate motif;GSK-3, ERK1, ERK2, CDK5 substrate motif;WW domain binding motif				0.990352	4.40368e-19	201.61	188.94	140.27	1.0523	1250900000	903340000	347590000	76	2.26008	0.0512251	0.893396	0.480673	0.789702	0.429875	1.12596	-0.406901	0.402794	0.29811	3.21185	0.324878	0.182563	0.219861	0.131765	1.63493	-0.705011	0.402794
NaN	0.292586	0.206593	NaN	-0.24231	-0.103916	NaN	0.329397	0.182819	NaN	-0.112873	-0.19096	NaN	0.51167	0.848237	S	2	+	Casein kinase II substrate motif;G protein-coupled receptor kinase 1 substrate motif;GSK3 kinase substrate motif	negative regulation of oskar mRNA translation [GO:0007319];pole plasm oskar mRNA localization [GO:0045451];positive regulation of border follicle cell migration [GO:1903688];positive regulation of mRNA splicing, via spliceosome [GO:0048026];positive regulation of translation [GO:0045727];regulation of mRNA splicing, via spliceosome [GO:0048024];spermatogenesis [GO:0007283]";"axon guidance [GO:000…	nucleoplasm [GO:0005654];nucleus [GO:0005634];P granule [GO:0043186];protein-containing complex [GO:0032991];ribonucleoprotein complex [GO:1990904]";"cytoplasm [GO:0005737]	mRNA 5'-UTR binding [GO:0048027];mRNA binding [GO:0003729];poly(G) binding [GO:0034046];poly(U) RNA binding [GO:0008266];RNA binding [GO:0003723];single-stranded DNA binding [GO:0003697]";"mRNA 3'-UTR binding [GO:0003730];RNA binding [GO:0003723]	0.999906	9.47253e-17	155.61	128.32	155.61	0.080915	1788800000	1218500000	570340000	366	2.25143	0.0520341	1.3923	-0.83187	1.37051	-0.853067	0.832028	-0.423846	0.881054	-0.430364	4.47589	1.69273	-0.401506	1.45352	-0.422702	0.024186	0.00651871	0.881054
0.788141	0.246558	0.0540793	0.990538	0.457939	0.318316	-0.16182	0.0673309	-0.0398482	-0.323551	-0.188455	-0.191759	-0.237859	-0.464166	-0.176833	S	2	+	Casein kinase II substrate motif	cytoplasmic translation [GO:0002181]	cytosolic large ribosomal subunit [GO:0022625]	structural constituent of ribosome [GO:0003735]	1	1.29544e-07	158.01	133	124.38	0.030352	2572500000	1793400000	779100000	91	2.25114	0.051915	0.233735	0.0583646	1.778	0.881884	1.06378	0.248174	1.29967	0.655879	4.37518	1.25106	-0.597515	0.30655	0.226005	0.823041	-0.407705	1.29967
-0.408933	-0.594291	NaN	NaN	0.628727	0.464041	NaN	-0.0757431	-0.00581129	-0.267983	-0.0845479	0.145351	NaN	-0.123198	NaN	S	3	+	b-Adrenergic Receptor kinase substrate motif;Casein kinase II substrate motif	negative regulation of transcription by RNA polymerase II [GO:0000122];ribosomal large subunit biogenesis [GO:0042273]";"negative regulation of histone acetylation [GO:0035067]	Noc2p-Noc3p complex [GO:0030691];nucleolus [GO:0005730];nucleoplasm [GO:0005654]";"Noc1p-Noc2p complex [GO:0030690]	repressing transcription factor binding [GO:0070491];transcription corepressor activity [GO:0003714]";"histone binding [GO:0042393]	1	1.88244e-52	216.19	197.87	108.99	-0.2003	1532200000	874090000	658140000	146	2.2449	0.0524294	-4.34294e-08	0	-4.34294e-08	0	-4.34294e-08	0	-4.34294e-08	0	0	1.07894	0.432552	1.86305	1.048	1.36423	0.460835	0
-0.126729	-0.447342	-0.449195	0.200653	0.0609519	0.0612261	-0.0418786	-0.231413	-0.29642	0.00269991	-0.0656743	-0.0399343	-0.0721381	-0.112867	-0.0919094	S	2	+	Casein kinase II substrate motif;PKA kinase substrate motif;PKC kinase substrate motif;Pyruvate dehydrogenase kinase substrate motif	posttranslational protein targeting to membrane, translocation [GO:0031204];SRP-dependent cotranslational protein targeting to membrane [GO:0006614]";"posttranslational protein targeting to endoplasmic reticulum membrane [GO:0006620]	fusome [GO:0045169];integral component of endoplasmic reticulum membrane [GO:0030176];Sec62/Sec63 complex [GO:0031207]";"endoplasmic reticulum [GO:0005783]	protein transporter activity [GO:0008565]	1	1.39822e-273	435.52	435.52	136.37	-0.52948	79523000000	60487000000	19035000000	599	2.24283	0.0524451	1.17813	0.058002	1.85159	0.199915	0.560533	-0.0975991	1.08473	-0.248784	4.67498	1.31768	0.306786	1.73386	0.448699	0.502176	0.151185	1.08473
0.266926	0.706892	0.551638	0.519295	0.207771	0.0629223	0.369529	0.0576069	0.00412722	0.0930998	0.0865787	0.119035	0.585347	0.925717	1.14607	S	2	+	Casein kinase I substrate motif;Casein kinase II substrate motif;G protein-coupled receptor kinase 1 substrate motif;GSK3 kinase substrate motif;Pyruvate dehydrogenase kinase substrate motif	translational initiation [GO:0006413]	cytosol [GO:0005829]";"cytoplasm [GO:0005737]	GTP binding [GO:0005525];GTPase activity [GO:0003924];translation initiation factor activity [GO:0003743]";"DEAD/H-box RNA helicase binding [GO:0017151]	1	1.88087e-190	397.62	372.6	350.57	0.68394	12804000000	8468300000	4335700000	25	2.24146	0.0523989	2.06661	-0.786141	1.37396	-0.622382	1.6923	-0.741958	0.842508	-0.377227	5.97538	1.46817	-0.408914	0.587293	-0.245155	0.994569	-0.364731	0.842508
-0.418141	-0.180723	-0.624505	1.23158	0.528155	0.480671	-0.0955999	-0.00183014	-0.432505	0.0632269	0.213129	0.301608	-0.103689	0.606537	0.310508	S	3	+	Cdc2 kinase substrate motif;CDK kinase substrate motif;CDK1,2,4,6 kinase substrate motif;DNA dependent Protein kinase substrate motif;ERK1,2 kinase substrate motif;GSK-3, ERK1, ERK2, CDK5 substrate motif;WW domain binding motif	eggshell chorion gene amplification [GO:0007307];G1/S transition of mitotic cell cycle [GO:0000082];mitotic cell cycle [GO:0000278];negative regulation of ubiquitin protein ligase activity [GO:1904667];neuroblast fate determination [GO:0007400];neuron fate specification [GO:0048665];peripheral nervous system development [GO:0007422];pole cell development [GO:0007277];positive regulation of apopto…	cyclin-dependent protein kinase holoenzyme complex [GO:0000307];cytoplasm [GO:0005737];nucleus [GO:0005634]";"centrosome [GO:0005813];nucleus [GO:0005634]	protein kinase binding [GO:0019901]";"cyclin-dependent protein serine/threonine kinase regulator activity [GO:0016538];transferase activity [GO:0016740]	0.999894	1.17946e-71	243.05	238.85	165.61	1.2469	3821100000	3055200000	765870000	198	2.23766	0.0526275	0.132877	-0.0784638	0.678905	0.475684	0.852759	-0.447764	1.31073	-0.678908	2.97527	1.83394	0.600445	1.86528	1.15459	0.559936	0.231145	1.31073
NaN	-0.0073142	0.113536	NaN	0.55284	0.40311	0.132645	-0.0170188	-0.0719267	0.493442	0.185059	0.274072	NaN	-0.080275	-0.122869	S	2	+	Casein kinase II substrate motif;Cdc2 kinase substrate motif;CDK kinase substrate motif;CDK1,2,4,6 kinase substrate motif;DNA dependent Protein kinase substrate motif;ERK1,2 kinase substrate motif;GSK-3, ERK1, ERK2, CDK5 substrate motif;WW domain binding motif	DNA replication initiation [GO:0006270];mitotic cell cycle [GO:0000278];mitotic DNA replication checkpoint [GO:0033314]";"cell division [GO:0051301]	nucleus [GO:0005634]	DNA replication origin binding [GO:0003688]	0.999962	7.31614e-279	459.42	449.16	427.47	-0.036978	17382000000	12680000000	4702900000	246	2.22827	0.0534525	1.4071	0.419097	1.75539	0.579547	0.611208	0.116139	0.862861	0.154683	4.63656	0.893065	0.264414	1.32201	0.424864	0.154897	-0.0385444	0.862861
-0.419985	-0.932141	-0.945971	-0.175367	-0.312855	-0.269877	-0.493513	-0.384646	NaN	-0.0696414	0.133822	-0.0875341	-0.247132	-0.184818	NaN	S	4	+	Casein kinase I substrate motif;Casein kinase II substrate motif;G protein-coupled receptor kinase 1 substrate motif;GSK3 kinase substrate motif;Pyruvate dehydrogenase kinase substrate motif	learning or memory [GO:0007611];locomotor rhythm [GO:0045475];long-term memory [GO:0007616];medium-term memory [GO:0072375];neuromuscular junction development [GO:0007528];positive regulation of feeding behavior [GO:2000253];positive regulation of transcription by RNA polymerase II [GO:0045944];regulation of circadian sleep/wake cycle, sleep [GO:0045187];regulation of transcription, DNA-templated…	transcription factor complex [GO:0005667]";"nucleus [GO:0005634];nucleus [GO:0005634]	DNA-binding transcription factor activity [GO:0003700];DNA-binding transcription factor activity [GO:0003700]";sequence-specific DNA binding [GO:0043565]";"DNA binding [GO:0003677]	0.999122	3.15859e-25	157.26	153.69	151.67	-0.88959	5766600000	4506800000	1259700000	182	2.22689	0.0534373	0.939466	0.20819	0.2461	-0.0367251	1.1503	-0.223105	1.03721	-0.550058	3.37308	1.81157	0.758248	1.34999	0.513333	0.609864	0.326953	1.03721
NaN	NaN	NaN	NaN	NaN	NaN	-0.66518	0.177089	NaN	-2.47208	-2.88161	-2.78846	NaN	NaN	NaN	S	3	+		phosphatidylserine biosynthetic process [GO:0006659]	integral component of membrane [GO:0016021]";"endomembrane system [GO:0012505]		0.976132	1.45352e-28	153.66	146.77	130.79	-0.46022	837040000	814800000	22241000	24	2.22474	0.0535556	-4.34294e-08	0	-4.34294e-08	0	-4.34294e-08	0	-4.34294e-08	0	0	0	NaN	-4.34294e-08	0	0	NaN	-4.34294e-08
0.278992	0.205292	0.234189	NaN	0.686797	0.456779	0.247273	0.193979	-0.0269287	0.162983	0.178758	-0.118544	NaN	-0.0782686	-0.249745	S	3	+	Casein kinase II substrate motif;Cdc2 kinase substrate motif;CDK kinase substrate motif;CDK1,2,4,6 kinase substrate motif;ERK1,2 kinase substrate motif;Growth associated histone HI kinase substrate motif;GSK-3, ERK1, ERK2, CDK5 substrate motif;MAPKAPK2 kinase substrate motif;MDC1 BRCT domain binding motif;Plk1 PBD domain binding motif;WW domain binding motif	protein dephosphorylation [GO:0006470];sleep [GO:0030431]";"calcineurin-mediated signaling [GO:0097720]	cytoplasm [GO:0005737]";"calcineurin complex [GO:0005955]	calmodulin-dependent protein phosphatase activity [GO:0033192];metal ion binding [GO:0046872];protein serine/threonine phosphatase activity [GO:0004722]";"calmodulin binding [GO:0005516];phosphoprotein phosphatase activity [GO:0004721]	0.754663	1.11521e-46	196.7	193.38	67.865	-0.4555	11511000000	8025500000	3485400000	77	2.22359	0.0535125	0.727268	0.238406	1.44404	0.735795	1.01886	0.302115	1.99015	0.403498	5.18032	0.76831	-0.165092	1.46164	0.332297	0.513041	-0.101383	1.99015
NaN	0.617487	NaN	NaN	0.452068	0.393416	0.568851	NaN	NaN	NaN	-0.0190534	-0.0619476	NaN	NaN	NaN	S	2	+	b-Adrenergic Receptor kinase substrate motif;Casein kinase II substrate motif;G protein-coupled receptor kinase 1 substrate motif;GSK3 kinase substrate motif	histone H3-K4 demethylation [GO:0034720];negative regulation of transcription, DNA-templated [GO:0045892]";"histone H3-K36 demethylation [GO:0070544]	nucleus [GO:0005634]";"nucleolus [GO:0005730]	histone demethylase activity (H3-K4 specific) [GO:0032453];iron ion binding [GO:0005506];oxidoreductase activity, acting on paired donors, with incorporation or reduction of molecular oxygen, 2-oxoglutarate as one donor, and incorporation of one atom each of oxygen into both donors [GO:0016706]";"histone demethylase activity (H3-K36 specific) [GO:0051864];histone demethylase activity (H3-K36 spec…	0.915448	2.39004e-07	123.19	110.04	123.19	-0.20151	263190000	171280000	91908000	42	2.21503	0.0543149	-4.34294e-08	0	-4.34294e-08	0	-4.34294e-08	0	-4.34294e-08	0	0	0	-0.657987	0	-0.194744	0	-0.0486357	0
-0.126574	-0.794406	-0.921587	0.103073	0.0827697	0.183913	0.10984	0.0130211	-0.0654265	0.551557	0.275833	0.378782	0.0284758	-0.720537	-0.58438	S	3	+	b-Adrenergic Receptor kinase substrate motif;Casein kinase I substrate motif;Casein kinase II substrate motif;Plk1 kinase substrate motif	cellular response to sucrose stimulus [GO:0071329];glycogen biosynthetic process [GO:0005978];glycogen metabolic process [GO:0005977];glycophagy [GO:0061723];positive regulation of glycogen catabolic process [GO:0045819];response to glucose [GO:0009749];response to sucrose [GO:0009744]";"cellular response to starvation [GO:0009267];glycogen biosynthetic process [GO:0005978]	cytoplasm [GO:0005737];cytoplasmic vesicle [GO:0031410]";"autophagosome [GO:0005776]	glycogen (starch) synthase activity [GO:0004373];glycogen synthase activity, transferring glucose-1-phosphate [GO:0061547];protein kinase binding [GO:0019901]";"glucose binding [GO:0005536];glycogen (starch) synthase activity [GO:0004373]	1	0	463.72	453.76	403.06	-0.043613	202150000000	139670000000	62473000000	676	2.21271	0.0543802	1.56083	0.827538	1.11025	0.548732	0.877774	0.444625	0.217661	-0.188708	3.76651	1.76271	1.01625	1.38473	0.737441	1.1829	0.633334	0.217661
-0.142927	-0.518615	-0.44223	NaN	0.46011	0.386557	-0.296226	0.033789	0.0502019	NaN	0.129055	0.33319	NaN	-0.187523	-0.241963	S	3	+	Casein kinase II substrate motif;Cdc2 kinase substrate motif;CDK kinase substrate motif;CDK1,2,4,6 kinase substrate motif;ERK1,2 kinase substrate motif;GSK-3, ERK1, ERK2, CDK5 substrate motif;WW domain binding motif	RNA splicing [GO:0008380]";"mRNA splicing, via spliceosome [GO:0000398]	precatalytic spliceosome [GO:0071011]";"catalytic step 2 spliceosome [GO:0071013]		1	2.95142e-05	134.08	120.17	25.883	-0.40119	16913000000	12427000000	4485700000	239	2.21103	0.0544341	1.2856	0.445865	2.29222	0.638077	0.398198	0.143998	0.419506	-0.153181	4.39552	1.43456	0.599046	1.8726	0.791258	0.858881	0.297179	0.419506
0.293146	0.378016	0.355401	0.223074	0.179635	0.163803	0.0881258	-0.0907409	-0.146818	-0.00878937	-0.228905	-0.0347089	-0.271312	0.101255	0.0727996	S	3	+	Casein kinase II substrate motif;DNA dependent Protein kinase substrate motif;ERK1,2 kinase substrate motif;G protein-coupled receptor kinase 1 substrate motif;GSK-3, ERK1, ERK2, CDK5 substrate motif;WW domain binding motif	positive regulation of response to oxidative stress [GO:1902884];triglyceride homeostasis [GO:0070328]";"lipid catabolic process [GO:0016042]		hydrolase activity [GO:0016787]	0.994669	3.54758e-45	206.39	201.62	176.87	-0.15621	12999000000	9231000000	3768100000	534	2.20821	0.0546356	0.158101	-0.0583819	0.849112	0.221257	0.0426115	-0.0173917	1.42448	0.374607	2.47431	2.37214	-0.432989	2.11161	-0.15335	2.18877	-0.391998	1.42448
-0.157361	-0.443171	-0.388339	-0.0700854	-0.0646657	-0.0909301	-0.291074	-0.258946	-0.395816	-0.0664445	-0.0774379	0.129511	-0.154246	-0.04592	0.0479479	S	2	+	14-3-3 domain binding motif;ATM kinase substrate motif;Calmodulin-dependent protein kinase II substrate motif;Casein kinase II substrate motif;DNA dependent Protein kinase substrate motif;MAPKAPK2 kinase substrate motif;PKA kinase substrate motif;PKC kinase substrate motif	locomotor rhythm [GO:0045475];positive regulation of translation [GO:0045727]";"defense response to bacterium [GO:0042742]			0.999981	1.73417e-108	318.94	318.94	215.15	0.47936	20539000000	15691000000	4848500000	1798	2.20788	0.0545355	0.198517	0.045949	0.155377	-0.0244876	1.68004	-0.264539	1.24391	-0.278884	3.27784	1.37374	0.324833	1.35228	0.254397	0.0509026	0.0143449	1.24391
-0.160907	-0.785368	-0.768629	-0.400522	-0.120558	-0.192847	-0.213744	-0.201403	-0.136698	0.221718	0.187075	0.126647	-0.287901	-0.690615	-0.73671	S	2	+	b-Adrenergic Receptor kinase substrate motif;Casein kinase II substrate motif	positive regulation of stem cell differentiation [GO:2000738]";"germarium-derived female germ-line cyst formation [GO:0030727]	nucleus [GO:0005634]";"cytosol [GO:0005829]		0.999967	3.06269e-30	211.82	199.51	94.128	-0.90198	51979000000	40901000000	11077000000	23	2.20645	0.0546703	2.17583	0.750222	0.943953	0.333767	1.25924	0.387794	0.000140462	0.000107805	4.37917	1.65007	0.750114	0.683816	0.333659	0.872541	0.387686	0.000140462
NaN	0.685267	0.867659	NaN	NaN	0.659468	NaN	NaN	NaN	0.147176	-0.0662008	-0.0432337	NaN	0.771801	NaN	S	2	+	Cdc2 kinase substrate motif;CDK kinase substrate motif;CDK1,2,4,6 kinase substrate motif;ERK1,2 kinase substrate motif;Growth associated histone HI kinase substrate motif;GSK-3, ERK1, ERK2, CDK5 substrate motif;MDC1 BRCT domain binding motif;Plk1 PBD domain binding motif;WW domain binding motif	mitotic DNA replication checkpoint [GO:0033314]			0.854194	1.65816e-56	243.94	221.94	218.48	-1.2231	459240000	274520000	184720000	363	2.2057	0.0545815	-4.34294e-08	0	-4.34294e-08	0	-4.34294e-08	0	-4.34294e-08	0	0	2.2057	-0.763883	0	-0.116995	0	NaN	0
NaN	-1.18181	-1.30379	NaN	-0.777324	-0.415572	NaN	-0.398391	-0.714507	NaN	-0.0694218	0.16727	NaN	-0.86173	-1.0482	S	2	+	Cdc2 kinase substrate motif;CDK kinase substrate motif;CDK1,2,4,6 kinase substrate motif;ERK1,2 kinase substrate motif;GSK-3, ERK1, ERK2, CDK5 substrate motif;MAPKAPK2 kinase substrate motif;WW domain binding motif	synaptic growth at neuromuscular junction [GO:0051124]";"nonassociative learning [GO:0046958]			0.991627	3.84799e-08	132.4	107.9	117.3	-3.7129	1240900000	935180000	305730000	1073	2.19998	0.0550949	1.66176	1.00389	0.657263	0.358515	0.790426	0.398514	0.910747	-0.287838	4.02019	1.9806	1.29173	1.11213	0.646353	1.25282	0.686352	0.910747
0.190073	0.14945	0.352021	0.224667	0.193474	0.220661	0.225339	0.208803	0.273486	0.340148	0.603248	0.661622	NaN	0.109705	0.11402	S	4	+	Casein kinase II substrate motif;DNA dependent Protein kinase substrate motif;PKA kinase substrate motif;PKC kinase substrate motif	kinetochore assembly [GO:0051382]";"attachment of spindle microtubules to kinetochore [GO:0008608]	condensed chromosome outer kinetochore [GO:0000940]		0.521284	0.00501592	47.195	37.318	47.195	1.6688	43990000000	33566000000	10424000000	491	2.19855	0.0552432	1.34454	0.423144	2.37806	0.101072	1.79859	0.124014	0.630423	0.118652	6.15161	1.22631	0.304491	0.100778	-0.0175807	0.0277606	0.00536131	0.630423
-0.142927	-0.502495	-0.412028	NaN	0.46011	0.372051	-0.296226	0.033789	0.0694272	NaN	0.129055	0.0576962	NaN	-0.264062	-0.246057	S	3	+	14-3-3 domain binding motif;Akt kinase substrate motif;Calmodulin-dependent protein kinase II substrate motif;Casein kinase II substrate motif;MAPKAPK1 kinase substrate motif;MDC1 BRCT domain binding motif;PKA kinase substrate motif;PKC epsilon kinase substrate motif;PKC kinase substrate motif;Plk1 PBD domain binding motif	RNA splicing [GO:0008380]";"mRNA splicing, via spliceosome [GO:0000398]	precatalytic spliceosome [GO:0071011]";"catalytic step 2 spliceosome [GO:0071013]		1	2.95142e-05	134.08	120.17	25.883	-0.40119	14607000000	10584000000	4023400000	237	2.19662	0.0553046	1.9598	0.348435	2.35126	0.67114	0.531225	0.190723	0.271327	-0.0974238	5.11361	1.28736	0.445859	1.89737	0.768564	0.842419	0.288147	0.271327
0.0315262	-0.279741	-0.341287	0.380272	0.304517	0.296456	0.135447	0.0576083	-0.0335595	0.4281	0.0576527	0.10084	-0.0359402	-0.131625	-0.0266753	S	2	+	Casein kinase II substrate motif;MAPKAPK2 kinase substrate motif;MDC1 BRCT domain binding motif;Plk1 PBD domain binding motif		integral component of membrane [GO:0016021]		0.986335	8.03079e-34	184.32	172.12	159.37	-0.99131	12481000000	8758600000	3722100000	227	2.19568	0.0552634	1.00362	0.260278	3.09942	0.391829	0.930188	0.117912	0.475642	-0.131754	5.50887	1.12216	0.392032	1.93914	0.523583	0.931413	0.249666	0.475642
NaN	0.408277	1.17694	0.0615688	NaN	NaN	-0.982167	NaN	-0.540783	NaN	0.0352017	-0.00817948	NaN	1.92208	1.61259	S	2	+	G protein-coupled receptor kinase 1 substrate motif	positive regulation of chromatin silencing [GO:0031937]";"embryonic development via the syncytial blastoderm [GO:0001700]	nucleus [GO:0005634]";"chromatin silencing complex [GO:0005677]	sequence-specific DNA binding [GO:0043565]";"chromatin insulator sequence binding [GO:0043035]	0.976711	1.72936e-06	148.18	135.44	133.91	0.53784	2136800000	1614100000	522760000	191	2.19144	0.0557319	2.10541	-1.75382	-4.34294e-08	0	1.95191	-2.52881	0.844866	-0.974725	4.90219	0.744037	-0.779099	0	-0.731042	1.13917	-1.55409	0.844866
0.283685	0.121078	-0.0952037	0.350217	-0.279337	-0.0603243	0.262001	-0.180479	-0.545073	0.72718	0.663044	0.815389	NaN	-0.387771	-0.516099	S	2	+	Casein kinase I substrate motif;Casein kinase II substrate motif;ERK1,2 kinase substrate motif;G protein-coupled receptor kinase 1 substrate motif;GSK3 kinase substrate motif;GSK-3, ERK1, ERK2, CDK5 substrate motif;PKA kinase substrate motif;WW domain binding motif	retrograde vesicle-mediated transport, Golgi to ER [GO:0006890]";"protein retention in ER lumen [GO:0006621]	integral component of Golgi membrane [GO:0030173]";"endoplasmic reticulum [GO:0005783]		0.992902	3.1799e-19	145.19	139.37	125.19	1.1128	1628800000	1221400000	407400000	248	2.18899	0.0557754	3.27117	1.18714	0.802606	0.455454	0.396386	0.297418	1.46873	0.555122	5.9389	2.22811	0.632018	0.176127	-0.0996678	0.426939	-0.257704	1.46873
0.566638	0.181544	0.350679	0.768723	0.516508	0.550845	0.0598998	-0.0351473	-0.0729855	0.239921	0.224082	0.0882424	0.165866	-0.119627	0.369905	S	3	+	14-3-3 domain binding motif;Calmodulin-dependent protein kinase II substrate motif;Calmodulin-dependent protein kinase IV substrate motif;Casein kinase II substrate motif;Chk1 kinase substrate motif;DNA dependent Protein kinase substrate motif;PKA kinase substrate motif;PKC kinase substrate motif	mitotic cell cycle [GO:0000278];regulation of cell cycle [GO:0051726];spindle assembly involved in female meiosis I [GO:0007057]";"centrosome cycle [GO:0007098]	gamma-tubulin ring complex [GO:0008274]";"cytoplasm [GO:0005737]	gamma-tubulin binding [GO:0043015]	1	1.8587e-08	156.57	84.53	25.83	0.42145	8857400000	6103200000	2754300000	335	2.18235	0.0564747	0.109439	0.0453673	1.36126	0.473311	0.452461	-0.154792	0.559296	0.227573	2.48246	0.682428	-0.182205	0.834506	0.245738	1.49671	-0.382365	0.559296
NaN	0.897321	0.640872	0.226385	0.616172	0.292506	0.765441	0.235722	0.329522	0.0136763	0.115566	0.0304114	NaN	0.905102	0.961988	S	2	+	G protein-coupled receptor kinase 1 substrate motif;GSK3 kinase substrate motif		spindle [GO:0005819]		1	2.24379e-37	215.86	198.24	176.25	0.62351	2339000000	1486100000	852940000	288	2.18112	0.0564681	3.50887	-0.880327	1.41551	-0.555191	0.984388	-0.489984	0.472217	-0.164448	6.38099	2.20333	-0.715879	0.914587	-0.390742	0.594975	-0.325535	0.472217
-0.0194813	0.215997	0.271088	0.361351	0.460072	0.411852	-0.032824	-0.175665	-0.148401	-0.0657583	0.0458975	0.0256439	-0.0121873	0.470314	0.281625	S	2	+	ERK1,2 kinase substrate motif;GSK-3, ERK1, ERK2, CDK5 substrate motif;WW domain binding motif	nucleosome mobilization [GO:0042766]";"chromatin assembly or disassembly [GO:0006333]	transcriptionally active chromatin [GO:0035327]";"nucleus [GO:0005634]	DNA binding [GO:0003677];helicase activity [GO:0004386];metal ion binding [GO:0046872];nucleosome binding [GO:0031491];nucleosome-dependent ATPase activity [GO:0070615]";"ATP binding [GO:0005524]	1	0.000191624	131.09	105.56	108.47	-1.0206	1086300000	728210000	358120000	63	2.18088	0.0563554	0.780574	-0.244656	0.50196	0.164508	1.16885	-0.365547	0.211581	-0.0907159	2.66297	0.739333	-0.15394	1.27948	0.255224	1.29737	-0.274831	0.211581
-0.510991	-0.611138	-0.438288	NaN	-0.0509059	-0.222885	0.120753	-0.00850808	NaN	NaN	NaN	NaN	NaN	NaN	-0.193024	S	2	+	Casein kinase II substrate motif;G protein-coupled receptor kinase 1 substrate motif;GSK3 kinase substrate motif	chromatin assembly or disassembly [GO:0006333];chromatin organization [GO:0006325];chromatin remodeling [GO:0006338];ecdysone receptor-mediated signaling pathway [GO:0035076];negative regulation of transcription, DNA-templated [GO:0045892];nuclear speck organization [GO:0035063];nucleosome assembly [GO:0006334];nucleosome mobilization [GO:0042766];nucleosome positioning [GO:0016584];positive regu…	CHRAC [GO:0008623];ISWI-type complex [GO:0031010];nucleus [GO:0005634];NURF complex [GO:0016589];polytene chromosome [GO:0005700];RSF complex [GO:0031213];transcription factor complex [GO:0005667]";"ACF complex [GO:0016590]	DNA binding [GO:0003677];DNA helicase activity [GO:0003678];DNA-dependent ATPase activity [GO:0008094];nucleosome binding [GO:0031491];nucleosome-dependent ATPase activity [GO:0070615];nucleotide binding [GO:0000166];transcription factor binding [GO:0008134]";"ATP binding [GO:0005524]	0.998108	9.39153e-38	220.83	206.97	186.44	0.33253	434930000	341920000	93012000	991	2.17996	0.0563439	-4.34294e-08	0	-4.34294e-08	0	-4.34294e-08	0	-4.34294e-08	0	0	0	NaN	1.61084	0.383243	2.24832	0.576261	0
0.287213	0.291957	0.470927	-0.233952	-0.110791	NaN	-0.180894	NaN	-0.225734	-0.189271	0.109497	0.091666	-0.330178	NaN	NaN	S	2	+	Cdc2 kinase substrate motif;CDK kinase substrate motif;CDK1,2,4,6 kinase substrate motif;ERK1,2 kinase substrate motif;G protein-coupled receptor kinase 1 substrate motif;GSK3 kinase substrate motif;GSK-3, ERK1, ERK2, CDK5 substrate motif;WW domain binding motif	autophagosome assembly [GO:0000045];autophagy [GO:0006914];autophagy of mitochondrion [GO:0000422];intestinal epithelial structure maintenance [GO:0060729];larval midgut cell programmed cell death [GO:0035096];macroautophagy [GO:0016236];mitophagy [GO:0000423];piecemeal microautophagy of the nucleus [GO:0034727];positive regulation of nurse cell apoptotic process [GO:0045850];protein localization…	cytosol [GO:0005829];extrinsic component of membrane [GO:0019898];phagophore assembly site [GO:0000407]";"Atg1/ULK1 kinase complex [GO:1990316]	protein kinase regulator activity [GO:0019887]";"protein kinase binding [GO:0019901]	0.999992	4.55775e-12	187.11	168.15	187.11	1.1527	2066400000	1546500000	519930000	368	2.17704	0.056628	-4.34294e-08	0	-4.34294e-08	0	-4.34294e-08	0	-4.34294e-08	0	0	1.41276	-0.346068	1.98494	-0.522404	2.2107	-0.553346	0
NaN	0.112481	NaN	NaN	NaN	0.127103	NaN	0.0223323	0.0428343	NaN	0.232043	0.255501	0.0831112	-0.0176069	0.0394191	S	3	+	ATM kinase substrate motif;Casein kinase II substrate motif;DNA dependent Protein kinase substrate motif	imaginal disc-derived leg morphogenesis [GO:0007480];imaginal disc-derived wing margin morphogenesis [GO:0008587];imaginal disc-derived wing vein morphogenesis [GO:0008586];imaginal disc-derived wing vein specification [GO:0007474];negative regulation of G1/S transition of mitotic cell cycle [GO:2000134];negative regulation of neuroblast proliferation [GO:0007406];positive regulation of transcrip…	nBAF complex [GO:0071565];npBAF complex [GO:0071564];nucleus [GO:0005634];RSC-type complex [GO:0016586];SWI/SNF complex [GO:0016514]";"brahma complex [GO:0035060]	DNA binding [GO:0003677]	0.99533	6.66774e-151	351.25	340.98	209.48	-0.69195	4079500000	2395500000	1684000000	417	2.17634	0.0565579	1.9055	0.208798	-4.34294e-08	0	0.0203244	-0.00239115	-4.34294e-08	0	1.92582	0	0.131291	0	0.0146219	0	-0.079898	0
-0.95858	-1.44726	-1.44746	-1.6825	-0.599206	-0.16915	-0.65878	0.0502895	0.00858879	0.285332	0.478305	0.340545	-0.640341	-1.57952	-1.39306	S	3	+	Casein kinase I substrate motif;Casein kinase II substrate motif;MAPKAPK2 kinase substrate motif;MDC1 BRCT domain binding motif;Plk1 PBD domain binding motif	rRNA 2'-O-methylation [GO:0000451]";"ribosome biogenesis [GO:0042254]	nucleolus [GO:0005730]		0.999924	3.80271e-78	291.64	276.83	120.61	0.19753	38810000000	34500000000	4310300000	171	2.16491	0.0576378	2.23631	1.57237	0.293831	0.387352	1.28103	1.00434	0.0861134	-0.0801289	3.89729	3.17587	1.6525	0.415473	0.467481	1.73772	1.08447	0.0861134
-0.405451	-0.512578	-0.471696	-0.290673	0.0310765	-0.0571795	-0.111274	0.0588788	-0.013288	-0.329411	-0.106226	-0.0959986	-0.353774	-0.164581	-0.279224	T	2	+	GSK-3, ERK1, ERK2, CDK5 substrate motif;WW domain binding motif	glutamate biosynthetic process [GO:0006537]";"ammonia assimilation cycle [GO:0019676]		flavin adenine dinucleotide binding [GO:0050660];FMN binding [GO:0010181];glutamate synthase (NADH) activity [GO:0016040];iron ion binding [GO:0005506];oxidoreductase activity [GO:0016491]";"3 iron, 4 sulfur cluster binding [GO:0051538];"glutamate synthase (NADH) activity [GO:0016040]	1	3.03799e-36	223.06	197.08	154.52	0.1234	10645000000	7888900000	2756300000	522	2.15755	0.0584188	0.399204	0.0886478	0.655555	0.160268	1.52468	0.243966	1.44954	-0.197382	4.02898	1.59411	0.28603	1.62092	0.35765	2.78563	0.441347	1.44954
0.327808	0.574984	0.356418	0.161681	-0.0370087	-0.153478	0.19991	-0.000661502	0.00471119	-0.177384	-0.0385761	-0.0795927	0.103263	0.412801	0.575368	S	4	+	BARD1 BRCT domain binding motif;Casein kinase II substrate motif	translational elongation [GO:0006414]	eukaryotic translation elongation factor 1 complex [GO:0005853]	translation elongation factor activity [GO:0003746]	1	4.87422e-281	434.84	424.4	142.24	-1.2056	132070000000	93248000000	38827000000	104	2.157	0.0583342	1.48295	-0.462328	1.0554	-0.373412	0.899585	-0.295824	0.129177	0.0559261	3.56711	2.3767	-0.518254	1.62668	-0.429338	1.58072	-0.35175	0.129177
0.207076	0.323399	0.255135	0.0277926	0.0371702	-0.0510834	0.0619102	0.0335034	-0.0170288	-0.0869606	-0.0359667	-0.0391767	0.00635531	0.317058	0.360563	S	2	+	Casein kinase II substrate motif;ERK1,2 kinase substrate motif;GSK-3, ERK1, ERK2, CDK5 substrate motif;WW domain binding motif	female meiosis chromosome segregation [GO:0016321];male meiotic nuclear division [GO:0007140];meiosis I cytokinesis [GO:0007110];microtubule-based movement [GO:0007018];mitotic cell cycle [GO:0000278];mitotic spindle organization [GO:0007052];reciprocal meiotic recombination [GO:0007131];regulation of mitotic nuclear division [GO:0007088];single fertilization [GO:0007338];spindle elongation [GO:0…	cytoplasm [GO:0005737];kinesin complex [GO:0005871];microtubule [GO:0005874];microtubule associated complex [GO:0005875];midbody [GO:0030496];nucleus [GO:0005634];spindle [GO:0005819];spindle midzone [GO:0051233]";"aster [GO:0005818]	ATP binding [GO:0005524];ATP-dependent microtubule motor activity, plus-end-directed [GO:0008574];microtubule binding [GO:0008017];microtubule motor activity [GO:0003777]";"ATPase activity [GO:0016887]	1	0.00216734	90.149	78.509	79.311	0.094085	11451000000	8273500000	3177300000	1043	2.15073	0.0587812	1.17617	-0.282027	0.906533	-0.223366	0.820986	-0.201864	0.104743	0.0338778	3.00843	2.96099	-0.315905	2.37539	-0.257244	2.34766	-0.235742	0.104743
NaN	-0.490092	-0.528113	NaN	-0.608095	-0.385166	NaN	-0.456527	-0.238641	NaN	-1.2222	-1.56747	-0.412789	-0.821666	-0.521369	S	3	+	b-Adrenergic Receptor kinase substrate motif;Casein kinase II substrate motif;ERK1,2 kinase substrate motif;G protein-coupled receptor kinase 1 substrate motif;Growth associated histone HI kinase substrate motif;GSK-3, ERK1, ERK2, CDK5 substrate motif;PKA kinase substrate motif;PKC kinase substrate motif;Pyruvate dehydrogenase kinase substrate motif;WW domain binding motif	female meiosis chromosome segregation [GO:0016321];female meiotic nuclear division [GO:0007143];homologous chromosome segregation [GO:0045143];meiotic spindle organization [GO:0000212];microtubule bundle formation [GO:0001578];mitotic spindle organization [GO:0007052];reciprocal meiotic recombination [GO:0007131]";"distributive segregation [GO:0032837]	polar microtubule [GO:0005827];spindle [GO:0005819]";"kinetochore microtubule [GO:0005828]	microtubule binding [GO:0008017]	1	6.92489e-34	236.82	183.93	182.7	0.12715	11548000000	10452000000	1095400000	81	2.15029	0.058639	1.54559	-0.809558	0.18483	0.0886441	0.563821	0.23769	0.178041	0.0761721	2.47228	1.43931	-0.88573	0.0351546	0.0124719	0.550376	0.161518	0.178041
-0.0340438	0.103128	-0.297307	-0.169667	1.17797	0.951429	0.0212119	0.0521249	0.125324	-0.133958	-0.0519645	-0.127748	NaN	1.72117	1.17503	S	2	+	14-3-3 domain binding motif;Calmodulin-dependent protein kinase II substrate motif;Casein kinase II substrate motif;G protein-coupled receptor kinase 1 substrate motif;MDC1 BRCT domain binding motif;PKA kinase substrate motif;PKC kinase substrate motif;Plk1 PBD domain binding motif	negative regulation of neuron death [GO:1901215];nucleic acid phosphodiester bond hydrolysis [GO:0090305]";"apoptotic process [GO:0006915]	postsynaptic membrane [GO:0045211];synaptic membrane [GO:0097060]";"intracellular [GO:0005622]	hydrolase activity [GO:0016787]	0.999929	2.50082e-200	389.68	379.18	389.68	-1.2727	8675800000	6422700000	2253100000	360	2.15024	0.058487	2.31284	-1.55266	0.583612	-0.794859	2.16166	-1.38188	2.03372	-1.52418	7.09183	0.0837414	-0.0284826	0.7765	0.729318	0.513613	0.142294	2.03372
0.062786	-0.55718	-0.409848	0.659733	0.508424	0.337081	0.624562	0.488874	0.37873	0.571458	0.294061	0.255124	0.364182	0.553059	0.0111542	S	2	+		heme transport [GO:0015886];response to cadmium ion [GO:0046686]";"cadmium ion transmembrane transport [GO:0070574]	mitochondrial inner membrane [GO:0005743];vacuolar membrane [GO:0005774]";"integral component of membrane [GO:0016021]	ATP binding [GO:0005524];heme transporter activity [GO:0015232]";"ATPase activity, coupled to transmembrane movement of substances [GO:0042626]	1	7.08688e-186	377.38	365.49	358.45	-1.8778	12653000000	8815200000	3837400000	824	2.1446	0.0590129	0.125134	0.0640823	0.449365	0.192281	0.467381	0.187924	1.17078	-0.610879	2.21266	1.4769	0.674961	1.73526	0.80316	1.78977	0.798803	1.17078
NaN	2.56879	2.06956	NaN	0.158208	-0.407287	NaN	2.7499	2.39998	NaN	NaN	0.0565835	NaN	0.263275	NaN	S	2	+	14-3-3 domain binding motif;ATM kinase substrate motif;Calmodulin-dependent protein kinase II substrate motif;Calmodulin-dependent protein kinase IV substrate motif;Casein kinase II substrate motif;Chk1 kinase substrate motif;DNA dependent Protein kinase substrate motif;PKA kinase substrate motif;PKC kinase substrate motif	RNA phosphodiester bond hydrolysis, endonucleolytic [GO:0090502]";"DNA replication, removal of RNA primer [GO:0043137]		nucleic acid binding [GO:0003676];RNA-DNA hybrid ribonuclease activity [GO:0004523]";"magnesium ion binding [GO:0000287]	1	1.87512e-14	193.27	162.93	193.27	1.3271	956700000	444760000	511940000	139	2.1396	0.0595	-4.34294e-08	0	-4.34294e-08	0	-4.34294e-08	0	-4.34294e-08	0	0	0	-2.26259	1.63823	-2.44372	0.310029	0.255765	0
-0.370442	-0.938984	-0.719279	-0.274352	-0.291841	-0.00167129	-0.890936	-0.587294	-0.912782	-0.196168	-0.23577	0.0666406	NaN	-0.332384	-0.323722	S	4	+	b-Adrenergic Receptor kinase substrate motif;BARD1 BRCT domain binding motif;Casein kinase I substrate motif;Casein kinase II substrate motif;G protein-coupled receptor kinase 1 substrate motif	negative regulation of gene expression [GO:0010629];negative regulation of transcription by RNA polymerase II [GO:0000122];neuroblast proliferation [GO:0007405];regulation of preblastoderm mitotic cell cycle [GO:0007347];syncytial nuclear migration [GO:0035190]";"negative regulation of cell proliferation [GO:0008285]	Myb complex [GO:0031523];nucleus [GO:0005634];polytene chromosome [GO:0005700]";"cytoplasm [GO:0005737]	DNA-binding transcription factor activity [GO:0003700];sequence-specific DNA binding [GO:0043565];zinc ion binding [GO:0008270]";"chromatin insulator sequence binding [GO:0043035]	1	2.67884e-200	378.2	372.6	282.51	0.67522	6769800000	5786600000	983210000	480	2.13896	0.0594499	0.719172	0.206287	0.474024	0.138766	1.39012	-0.468951	0.695138	-0.348182	3.27845	1.358	0.554469	1.20244	0.486947	0.243206	-0.120769	0.695138
0.348842	0.388121	0.350839	0.705032	0.495388	0.28048	0.337625	-0.054403	-0.00603037	0.161294	0.0765993	0.0467369	0.568421	0.439828	0.564139	S	3	+	Casein kinase II substrate motif;G protein-coupled receptor kinase 1 substrate motif;GSK3 kinase substrate motif	genitalia development [GO:0048806];mRNA splicing, via spliceosome [GO:0000398];positive regulation of programmed cell death [GO:0043068];regulation of alternative mRNA splicing, via spliceosome [GO:0000381];regulation of circadian rhythm [GO:0042752];somatic sex determination [GO:0018993]";"compound eye development [GO:0048749]	exon-exon junction complex [GO:0035145];nucleus [GO:0005634];precatalytic spliceosome [GO:0071011]";"catalytic step 2 spliceosome [GO:0071013]		1	5.99359e-31	193.5	190.7	170.68	0.022508	18446000000	12742000000	5704600000	667	2.13791	0.0593692	2.85655	-0.429253	0.0832613	-0.030496	1.52812	-0.431732	1.66825	-0.161529	6.13619	2.73049	-0.267724	0.458983	0.131033	1.02243	-0.270203	1.66825
NaN	-0.0332004	0.0543624	NaN	-0.444164	-0.397018	NaN	-0.0846398	-0.214843	NaN	-0.34806	NaN	NaN	-0.267705	-0.288311	S	3	+	14-3-3 domain binding motif;AMP-activated protein kinase substrate motif;Calmodulin-dependent protein kinase II substrate motif;Casein kinase II substrate motif;G protein-coupled receptor kinase 1 substrate motif;HMGCoA Reductase kinase substrate motif;MAPKAPK2 kinase substrate motif;PKA kinase substrate motif;PKC kinase substrate motif;Pyruvate dehydrogenase kinase substrate motif	protein folding [GO:0006457];protein targeting to membrane [GO:0006612];Wnt signaling pathway [GO:0016055]";"ER to Golgi vesicle-mediated transport [GO:0006888]	cytoplasm [GO:0005737];endomembrane system [GO:0012505];endoplasmic reticulum [GO:0005783];endoplasmic reticulum lumen [GO:0005788]";"apical part of cell [GO:0045177]	identical protein binding [GO:0042802]	1	9.34502e-15	198.44	154.68	139.49	0.088321	269800000	191600000	78200000	38	2.13663	0.0593811	-4.34294e-08	0	1.50798	-0.142583	0.718854	0.128267	1.63005	0.288589	3.85688	0	-0.358641	1.88472	-0.431172	0.750294	-0.160322	1.63005
0.0249664	-0.486176	-0.513371	-0.0822327	0.199625	0.269207	0.279204	0.351176	0.983249	-0.0493076	-0.164679	0.038227	-0.221399	-0.50105	-0.852452	S	2	+	Casein kinase II substrate motif;ERK1,2 kinase substrate motif;GSK-3, ERK1, ERK2, CDK5 substrate motif;WW domain binding motif		peroxisome [GO:0005777]		1	5.07453e-20	186.77	132.43	169.98	-0.25728	1149200000	845520000	303720000	316	2.13517	0.0593622	1.14363	0.466381	1.43537	0.653834	1.67413	1.06284	0.324994	0.200107	4.57813	0.652044	0.266274	1.03735	0.453727	1.41454	0.862736	0.324994
-0.11484	-0.0388208	-0.132183	-0.21359	-0.506285	-0.110203	0.164764	0.306934	0.0617125	0.36717	0.359738	0.63815	0.325492	-0.0370107	-0.276959	S	3	+	G protein-coupled receptor kinase 1 substrate motif	negative regulation of transcription by RNA polymerase II [GO:0000122]	nucleus [GO:0005634];NuRD complex [GO:0016581];polytene chromosome [GO:0005700]";"nucleoplasm [GO:0005654]	nucleic acid binding [GO:0003676]";"chromatin binding [GO:0003682]	1	2.24433e-46	243.28	237.32	123.99	0.86469	6973600000	4945700000	2027900000	197	2.13454	0.0592875	1.07317	0.451179	0.592834	-0.280533	0.387849	0.173963	0.217376	-0.0991219	2.27123	2.33895	0.5503	0.675078	-0.181411	1.62836	0.273085	0.217376
-0.268611	-0.404924	-0.447195	-0.169044	-0.140382	-0.14643	-0.0996976	-0.111547	-0.214303	-0.139512	-0.0282642	-0.100523	-0.193059	0.0872575	0.0930889	S	2	+	AMP-activated protein kinase substrate motif;Casein kinase II substrate motif;ERK1,2 kinase substrate motif;GSK-3, ERK1, ERK2, CDK5 substrate motif;HMGCoA Reductase kinase substrate motif;PKA kinase substrate motif;PKC kinase substrate motif;WW domain binding motif	regulation of stem cell differentiation [GO:2000736]	nuclear body [GO:0016604]	identical protein binding [GO:0042802]	1	7.875e-15	158.05	100.85	109.51	-0.032353	17708000000	13656000000	4052200000	329	2.1312	0.0597259	0.354789	-0.0851954	0.711531	-0.147714	0.610001	-0.137612	1.56309	-0.369339	3.23941	1.96974	0.284143	1.81401	0.221625	1.6289	0.231727	1.56309
NaN	NaN	NaN	NaN	1.61476	NaN	NaN	2.16372	1.42798	NaN	-0.204034	-0.114379	NaN	2.44464	2.32268	S	2	+	Casein kinase I substrate motif;G protein-coupled receptor kinase 1 substrate motif;GSK3 kinase substrate motif;PKA kinase substrate motif;PKC kinase substrate motif	mitotic spindle organization [GO:0007052];regulation of mitotic nuclear division [GO:0007088];spindle assembly [GO:0051225]";"cell division [GO:0051301]	cytoplasm [GO:0005737];HAUS complex [GO:0070652];microtubule [GO:0005874];microtubule organizing center [GO:0005815];spindle [GO:0005819];spindle pole [GO:0000922]";"condensed chromosome kinetochore [GO:0000777]		1	1.47836e-15	159.35	123.91	159.35	0.90679	1068500000	346310000	722230000	364	2.12569	0.0602987	3.0532	-2.54287	-4.34294e-08	0	0.592354	-0.587806	-4.34294e-08	0	3.64556	0	NaN	0	NaN	0	NaN	0
-0.153135	-0.261819	-0.288673	-0.153433	-0.265645	-0.217046	-0.0393511	-0.0140045	-0.144112	0.0212009	0.00410747	0.031298	-0.0714182	-0.311418	-0.221487	S	3	+	BARD1 BRCT domain binding motif;Casein kinase II substrate motif;DNA dependent Protein kinase substrate motif	nucleolus organization [GO:0007000]";"multicellular organism development [GO:0007275]	nucleus [GO:0005634];spindle [GO:0005819]";"nucleolus [GO:0005730]		1	2.93094e-150	372.31	357.23	103.41	0.96099	257820000000	206350000000	51471000000	744	2.12278	0.0605	1.45243	0.22031	0.0470215	-0.0106006	0.776025	0.135618	0.151872	-0.0331015	2.42735	2.41266	0.253411	0.160438	0.0225009	1.37093	0.16872	0.151872
NaN	-0.0778362	-0.156681	NaN	0.00424418	0.206992	0.226385	0.530142	0.248336	NaN	-0.39632	-0.146328	NaN	-0.320313	-0.413998	S	2	+	b-Adrenergic Receptor kinase substrate motif;Casein kinase II substrate motif;PKA kinase substrate motif	tRNA methylation [GO:0030488]	tRNA (m1A) methyltransferase complex [GO:0031515]";"nucleus [GO:0005634]		0.999998	1.85358e-12	174.48	143.57	174.48	0.4627	10483000000	7696700000	2786300000	325	2.12066	0.0605844	0.261743	0.0958317	1.28802	0.472774	1.89588	0.70211	1.25878	0.249897	4.70442	0.442748	-0.154065	0.752061	0.222877	1.39999	0.452213	1.25878
NaN	-1.22762	-1.17748	NaN	-0.608237	-0.516706	NaN	-0.897226	-0.343843	NaN	0.337167	0.441674	NaN	-1.49462	-0.916949	S	2	+	Calmodulin-dependent protein kinase II substrate motif;Casein kinase II substrate motif;Chk1 kinase substrate motif;ERK1, ERK2, SAPK, CDK5 and GSK3 kinase substrate motif;ERK1,2 kinase substrate motif;G protein-coupled receptor kinase 1 substrate motif;Growth associated histone HI kinase substrate motif;GSK-3, ERK1, ERK2, CDK5 substrate motif;PKA kinase substrate motif;PKC kinase substrate motif;…	DNA synthesis involved in double-strand break repair via homologous recombination [GO:0043150]";"DNA repair [GO:0006281]		DNA polymerase binding [GO:0070182]	1	5.81349e-05	135.26	78.098	47.606	0.5322	4897200000	4164800000	732430000	405	2.11623	0.0609799	1.49174	1.59521	0.799068	0.643314	0.551355	0.585251	0.00344227	0.00323707	2.84561	2.87855	1.59197	2.18175	0.640077	0.766546	0.582014	0.00344227
-0.153903	0.00144204	0.075247	0.284586	0.928503	0.551787	0.156546	0.229152	0.231945	0.184636	-0.0472868	-0.0962366	NaN	-0.0916569	-0.181501	S	3	+	ATM kinase substrate motif;Casein kinase II substrate motif;DNA dependent Protein kinase substrate motif	mRNA transport [GO:0051028];nuclear pore organization [GO:0006999];protein import into nucleus [GO:0006606]";"gravitaxis [GO:0042332]	nuclear pore inner ring [GO:0044611]	structural constituent of nuclear pore [GO:0017056]	1	2.21412e-47	182.74	175.51	147.25	-0.74519	5251700000	3652000000	1599600000	2002	2.11561	0.0609123	0.540155	0.150283	1.23129	0.724871	2.29363	0.34246	0.493891	0.110841	4.55897	0.132131	0.0394419	1.43751	0.61403	1.49164	0.231619	0.493891
0.680731	1.26508	1.2784	0.151211	0.093425	-0.163446	0.444531	0.761796	-0.236487	0.0971244	-0.0996844	-0.462137	-0.0263226	0.222054	0.339531	S	2	+	Casein kinase II substrate motif;G protein-coupled receptor kinase 1 substrate motif;Pyruvate dehydrogenase kinase substrate motif	microtubule-based process [GO:0007017];nuclear axial expansion [GO:0035191];positive regulation of chromatin silencing [GO:0031937];regulation of cytoskeleton organization [GO:0051493];regulation of gene expression [GO:0010468]";"gene looping [GO:0090202]	condensed chromosome [GO:0000793];microtubule associated complex [GO:0005875];nucleus [GO:0005634];pericentriolar material [GO:0000242];polytene chromosome [GO:0005700];polytene chromosome band [GO:0005704];spindle microtubule [GO:0005876]";"centrosome [GO:0005813]	chromatin insulator sequence binding [GO:0043035];DNA binding [GO:0003677];metal ion binding [GO:0046872];microtubule binding [GO:0008017];POZ domain binding [GO:0031208];protein homodimerization activity [GO:0042803]";"chromatin binding [GO:0003682]	0.985157	8.75539e-21	149.48	145.05	92.01	-1.7047	3444000000	2457200000	986840000	866	2.1095	0.061555	0.78407	-0.33332	0.449714	-0.151357	0.175124	0.14486	1.78887	0.896316	3.19778	2.06277	-1.22964	2.05456	-1.04767	0.9946	-0.751456	1.78887
0.0574896	-0.0461675	-0.0482524	-0.217772	-0.233286	-0.150355	0.0283467	0.177053	0.221233	0.0776598	-0.199609	-0.218466	0.022159	0.212379	0.184351	S	2	+	Casein kinase II substrate motif;DNA dependent Protein kinase substrate motif;ERK1,2 kinase substrate motif;G protein-coupled receptor kinase 1 substrate motif;GSK-3, ERK1, ERK2, CDK5 substrate motif;WW domain binding motif	nucleolus organization [GO:0007000]";"multicellular organism development [GO:0007275]	nucleus [GO:0005634];spindle [GO:0005819]";"nucleolus [GO:0005730]		1	3.07182e-15	185.14	173.7	92.913	-0.67475	4858900000	3463900000	1395000000	1004	2.10523	0.0619002	1.05625	-0.253101	2.20704	-0.340101	0.010225	0.00258126	1.03719	-0.15194	4.31072	0.423698	-0.101161	1.91703	-0.188161	1.06822	0.154521	1.03719
0.311154	0.15301	0.427774	NaN	0.622556	0.486851	-0.110308	-0.0896852	-0.235137	NaN	-0.0392722	0.35252	NaN	-0.0358602	0.0688064	T	2	+	b-Adrenergic Receptor kinase substrate motif;GSK-3, ERK1, ERK2, CDK5 substrate motif;WW domain binding motif	detoxification of zinc ion [GO:0010312];regulation of sequestering of zinc ion [GO:0061088];response to zinc ion [GO:0010043];zinc ion transmembrane transport [GO:0071577]";"cellular zinc ion homeostasis [GO:0006882]	integral component of membrane [GO:0016021];plasma membrane [GO:0005886]";"apical plasma membrane [GO:0016324]	zinc ion transmembrane transporter activity [GO:0005385]";"zinc efflux transmembrane transporter activity [GO:0022883]	1	0.000441874	109.65	93.708	72.29	-0.92604	1716700000	1195900000	520770000	7	2.09467	0.0631343	0.251121	0.140151	1.61222	0.53823	0.975981	-0.161517	1.07771	0.28084	3.91703	0.311334	-0.140689	0.957587	0.257391	2.07111	-0.442356	1.07771
0.00868475	-0.104442	-0.384471	-0.381079	-0.522131	-0.308272	0.0377125	-0.042822	0.000409383	-0.0620498	-0.126778	-0.0976425	-0.317345	-0.34109	-0.219242	T	2	+	Cdc2 kinase substrate motif;CDK1,2,4,6 kinase substrate motif;CDK5 kinase substrate motif;GSK-3, ERK1, ERK2, CDK5 substrate motif;WW domain binding motif		heterochromatin [GO:0000792];nucleosome [GO:0000786];nucleus [GO:0005634];polytene chromosome [GO:0005700]";"cytoplasm [GO:0005737]	satellite DNA binding [GO:0003696]";"AT DNA binding [GO:0003680];DNA binding [GO:0003677]	0.99997	1.66391e-112	318.85	318.85	202.15	0.69553	89355000000	71752000000	17603000000	321	2.09199	0.0633648	2.03846	0.197069	0.694181	-0.111269	2.56857	0.290992	0.467397	0.132483	5.76861	0.211657	0.0645857	0.853904	-0.243752	0.594859	0.158509	0.467397
-0.262255	-0.207922	NaN	NaN	0.162541	0.0309717	-0.110635	-0.0704129	-0.112568	-0.186448	NaN	NaN	-0.26029	NaN	NaN	S	3	+	Casein kinase II substrate motif;PKA kinase substrate motif;PKC kinase substrate motif	ecdysone-mediated induction of salivary gland cell autophagic cell death [GO:0035072];positive regulation of programmed cell death [GO:0043068];pupal development [GO:0035209];regulation of programmed cell death [GO:0043067];regulation of transcription by RNA polymerase II [GO:0006357];salivary gland histolysis [GO:0035070];transcription initiation from RNA polymerase II promoter [GO:0006367]";"ac…	nucleus [GO:0005634]";"mediator complex [GO:0016592]	transcription coregulator activity [GO:0003712]	0.681844	8.45898e-38	220.17	206.66	218.42	0.016704	6378400000	4637400000	1740900000	827	2.07498	0.0656881	-4.34294e-08	0	-4.34294e-08	0	-4.34294e-08	0	-4.34294e-08	0	0	0	0.048641	1.36601	0.331845	1.83564	0.137217	0
0.198508	0.00308423	-0.0269497	0.438754	0.449135	0.353717	-0.154648	-0.13233	-0.206867	0.147703	0.126489	0.19734	0.169405	-0.530441	-0.166916	T	2	+	Cdc2 kinase substrate motif;CDK1,2,4,6 kinase substrate motif;Growth associated histone HI kinase substrate motif;GSK-3, ERK1, ERK2, CDK5 substrate motif;WW domain binding motif	exocytosis [GO:0006887];Golgi organization [GO:0007030];macroautophagy [GO:0016236];protein secretion [GO:0009306]";"endoplasmic reticulum organization [GO:0007029]	integral component of membrane [GO:0016021];phagophore assembly site [GO:0000407]";"endoplasmic reticulum [GO:0005783]		0.996085	1.40562e-14	184.99	184.99	184.99	0.5427	27296000000	20149000000	7147100000	510	2.07497	0.0655457	0.753547	0.333161	1.34963	0.589852	0.0185968	0.0113687	0.474395	0.234198	2.59617	0.600925	0.0989631	2.00734	0.355654	1.40247	-0.222829	0.474395
0.192592	0.400429	0.418136	NaN	0.0549179	NaN	NaN	-0.256218	-0.39591	NaN	-0.162573	NaN	NaN	NaN	0.659649	S	3	+	Casein kinase II substrate motif;Cdc2 kinase substrate motif;CDK kinase substrate motif;CDK1,2,4,6 kinase substrate motif;ERK1,2 kinase substrate motif;Growth associated histone HI kinase substrate motif;GSK-3, ERK1, ERK2, CDK5 substrate motif;MDC1 BRCT domain binding motif;Plk1 PBD domain binding motif;WW domain binding motif	ubiquitin-dependent protein catabolic process [GO:0006511]";"protein monoubiquitination [GO:0006513]	ubiquitin ligase complex [GO:0000151]";"cytoplasm [GO:0005737]	ubiquitin protein ligase binding [GO:0031625];ubiquitin-protein transferase activity [GO:0004842]";"ubiquitin conjugating enzyme activity [GO:0061631]	0.705466	7.17329e-56	223.53	210.7	170.95	0.17308	1585300000	1267800000	317520000	845	2.07242	0.0659606	-4.34294e-08	0	-4.34294e-08	0	-4.34294e-08	0	-4.34294e-08	0	0	0	-0.499626	0	-0.282134	2.07242	-0.663116	0
-0.0522155	-0.224367	-0.00704309	-0.254431	-0.15588	-0.209512	0.0530816	0.208268	0.23813	-0.0751036	-0.115363	-0.0848409	-0.00658981	-0.240942	-0.326299	S	2	+	Cdc2 kinase substrate motif;CDK kinase substrate motif;CDK1,2,4,6 kinase substrate motif;ERK1,2 kinase substrate motif;Growth associated histone HI kinase substrate motif;GSK-3, ERK1, ERK2, CDK5 substrate motif;PKA kinase substrate motif;PKC kinase substrate motif;WW domain binding motif	attachment of mitotic spindle microtubules to kinetochore [GO:0051315];centrosome duplication [GO:0051298];chorion-containing eggshell formation [GO:0007304];DNA endoreduplication [GO:0042023];DNA replication [GO:0006260];DNA replication checkpoint [GO:0000076];DNA replication preinitiation complex assembly [GO:0071163];eggshell chorion gene amplification [GO:0007307];glial cell development [GO:0…	nucleus [GO:0005634];replication fork [GO:0005657]";"cytoplasm [GO:0005737]	DNA polymerase binding [GO:0070182]";"DNA binding [GO:0003677]	0.999378	0.000725309	106.88	80.091	55.908	1.2884	2209400000	1594500000	614870000	111	2.0705	0.0660639	0.443674	0.0995076	0.0529234	-0.0153307	1.48681	0.35777	0.344674	0.0967348	2.32809	0.0136245	0.00277281	0.710035	-0.112065	1.38994	0.261035	0.344674
-0.362805	-0.0509507	-0.950946	0.240131	-0.615073	-0.120551	-0.495623	-0.487265	0.0241362	0.385376	0.517778	0.344273	NaN	-1.07763	-1.13302	S	3	+	14-3-3 domain binding motif;Calmodulin-dependent protein kinase II substrate motif;Casein kinase II substrate motif;G protein-coupled receptor kinase 1 substrate motif;Pim1 kinase substrate sequence;PKA kinase substrate motif;PKC epsilon kinase substrate motif;PKC kinase substrate motif;ZIP kinase substrate motif	positive regulation of transcription by RNA polymerase II [GO:0045944];regulation of chromatin organization [GO:1902275];regulation of chromatin silencing at centromere [GO:0090052]";"double-strand break repair [GO:0006302]	nuclear euchromatin [GO:0005719]";"chromosome, centromeric region [GO:0000775]	transcription coactivator activity [GO:0003713]	0.999708	4.75003e-18	170.98	165.27	156.05	0.35486	2118000000	1708700000	409310000	878	2.07045	0.065902	3.65884	1.52114	1.21529	0.940163	1.41169	0.785743	0.816066	0.650426	7.10189	1.49801	0.87071	0.329415	0.289737	0.161441	0.135317	0.816066
-0.58576	-0.529858	-0.489136	-0.219652	0.237306	0.0828859	-0.24012	-0.0719128	-0.0673109	-0.129181	0.021258	-0.0813821	-0.474158	-0.109	-0.130536	S	2	+	ERK1,2 kinase substrate motif;GSK-3, ERK1, ERK2, CDK5 substrate motif;PKA kinase substrate motif;PKC kinase substrate motif;WW domain binding motif	threonyl-tRNA aminoacylation [GO:0006435]	mitochondrion [GO:0005739]";"cytoplasm [GO:0005737]	threonine-tRNA ligase activity [GO:0004829]";"ATP binding [GO:0005524]	1	1.30201e-07	149	80.214	126.71	-0.15804	8808000000	6791600000	2016400000	20	2.07041	0.0657408	0.622121	0.174796	0.690734	0.271411	0.352989	0.11145	1.14902	-0.29702	2.81487	3.07202	0.471816	1.84456	0.568431	2.52547	0.40847	1.14902
-0.128406	-0.269288	-0.136076	0.473436	1.06973	0.415858	0.0415689	-0.33901	-0.303201	-0.0578158	0.11045	0.0766316	-0.0299549	0.535305	0.017015	S	3	+	Casein kinase II substrate motif;Cdc2 kinase substrate motif;CDK kinase substrate motif;CDK1,2,4,6 kinase substrate motif;ERK1,2 kinase substrate motif;G protein-coupled receptor kinase 1 substrate motif;GSK3 kinase substrate motif;GSK-3, ERK1, ERK2, CDK5 substrate motif;WW domain binding motif	phospholipid translocation [GO:0045332];retrograde vesicle-mediated transport, Golgi to ER [GO:0006890]";"endocytosis [GO:0006897]	integral component of membrane [GO:0016021];plasma membrane [GO:0005886];trans-Golgi network [GO:0005802]";"endosome [GO:0005768]	magnesium ion binding [GO:0000287];phospholipid-translocating ATPase activity [GO:0004012]";"ATP binding [GO:0005524]	0.996002	0	491.13	453.3	479.82	-0.55983	13679000000	10199000000	3479900000	680	2.06694	0.0660195	0.280075	-0.131033	0.800261	0.478886	0.792981	-0.374336	0.877616	-0.352045	2.75093	1.48805	0.221012	1.74984	0.830932	0.0595539	-0.0222903	0.877616
0.0345268	0.106332	0.207393	0.13353	0.176296	0.385094	-0.113615	0.0522543	0.0111745	-0.0823867	0.0232141	-0.0490696	-0.0552087	-0.490505	-0.689737	S	2	+	ERK1,2 kinase substrate motif;GSK-3, ERK1, ERK2, CDK5 substrate motif;MDC1 BRCT domain binding motif;Plk1 PBD domain binding motif;WW domain binding motif	nuclear migration [GO:0007097]";"microtubule-based movement [GO:0007018]	dynactin complex [GO:0005869]		0.977907	3.63747e-06	145.81	128.9	130.19	0.16046	940930000	655790000	285150000	381	2.06036	0.0665596	0.924351	0.375736	1.47134	0.643457	0.953836	0.395088	1.2767	0.527901	4.62623	1.21116	-0.152165	0.553433	0.115556	0.874227	-0.132813	1.2767
0.0277455	NaN	-0.0867849	0.613719	0.514905	NaN	-0.125132	NaN	-0.297981	-0.161447	0.120219	-0.0637559	-0.0467394	-0.603628	-0.350524	S	2	+	Casein kinase II substrate motif;ERK1,2 kinase substrate motif;GSK-3, ERK1, ERK2, CDK5 substrate motif;WW domain binding motif	cellular amino acid biosynthetic process [GO:0008652];histidine biosynthetic process [GO:0000105];methionine biosynthetic process [GO:0009086];purine nucleobase biosynthetic process [GO:0009113];purine nucleotide biosynthetic process [GO:0006164];tetrahydrofolate interconversion [GO:0035999]";"10-formyltetrahydrofolate biosynthetic process [GO:0009257]	cytoplasm [GO:0005737]	formate-tetrahydrofolate ligase activity [GO:0004329];methenyltetrahydrofolate cyclohydrolase activity [GO:0004477];methylenetetrahydrofolate dehydrogenase (NADP+) activity [GO:0004488]";"ATP binding [GO:0005524]	0.987259	2.23866e-08	163.09	131.1	163.09	0.81726	976600000	711620000	264980000	579	2.05733	0.0668738	0.75905	0.298636	1.62331	0.897943	0.211874	0.122074	0.606953	0.304111	3.20119	0.0154871	-0.00547495	1.80032	0.593832	0.655215	-0.182037	0.606953
0.258338	-0.0259407	0.243383	NaN	0.67248	0.603976	NaN	-0.161627	-0.552126	NaN	-0.117509	NaN	NaN	0.180823	0.173295	T	3	+	Casein kinase II substrate motif;GSK-3, ERK1, ERK2, CDK5 substrate motif;RAF1 kinase substrate motif;WW domain binding motif	translation [GO:0006412];translational termination [GO:0006415]";"cytoplasmic translational termination [GO:0002184]	translation release factor complex [GO:0018444]";"cytosol [GO:0005829]	GTP binding [GO:0005525];translation release factor activity [GO:0003747];translation termination factor activity [GO:0008079]";"GTPase activity [GO:0003924]	1	4.03696e-39	182.47	171.4	178.92	2.6691	1680400000	1288000000	392410000	158	2.05133	0.0675932	-4.34294e-08	0	2.25676	0.461169	0.951621	-0.533936	0.0521746	-0.0184658	3.26056	0	-0.276103	1.53357	0.479635	1.14658	-0.51547	0.0521746
-0.854137	-0.131847	-0.226393	-0.932066	-0.58509	-0.631641	-0.616903	-0.399365	-0.485981	-0.254438	-0.217993	-0.171934	-0.157273	0.667914	0.636397	S	2	+	14-3-3 domain binding motif;Calmodulin-dependent protein kinase II substrate motif;Casein kinase II substrate motif;MAPKAPK2 kinase substrate motif;PAK2 kinase substrate motif;PKA kinase substrate motif;PKC epsilon kinase substrate motif;PKC kinase substrate motif	proteasome-mediated ubiquitin-dependent protein catabolic process [GO:0043161];ubiquitin-dependent protein catabolic process [GO:0006511]";"cellular response to virus [GO:0098586]	nucleoplasm [GO:0005654];nucleus [GO:0005634]";"cytosol [GO:0005829]	ubiquitin binding [GO:0043130];ubiquitin protein ligase binding [GO:0031625]";"metal ion binding [GO:0046872]	0.989688	1.21912e-49	257.06	229.37	195.74	0.44999	10830000000	8401300000	2428200000	115	2.04707	0.0680097	1.03475	-0.597134	1.70945	-1.09861	1.47657	-0.883095	1.0482	-0.786471	5.26896	0.344074	0.189337	0.549455	-0.31214	0.153421	-0.0966241	1.0482
-0.472706	-0.63784	-0.552554	NaN	0.216597	-0.375033	-0.493926	0.301957	-0.134623	0.492715	0.778103	0.644825	-0.342122	-0.334678	0.220596	S	4	+	BARD1 BRCT domain binding motif;Casein kinase II substrate motif;MDC1 BRCT domain binding motif;Plk1 PBD domain binding motif	histone H3-K9 methylation [GO:0051567];multicellular organism development [GO:0007275];negative regulation of transcription involved in meiotic cell cycle [GO:0051038];oogenesis [GO:0048477];positive regulation of methylation-dependent chromatin silencing [GO:0090309];regulation of gene expression, epigenetic [GO:0040029];regulation of gene silencing [GO:0060968]";"female germ-line stem cell asym…	nucleus [GO:0005634];polytene chromosome [GO:0005700]";"cytoplasm [GO:0005737]	histone methyltransferase activity (H3-K9 specific) [GO:0046974];histone-lysine N-methyltransferase activity [GO:0018024];zinc ion binding [GO:0008270]";"DNA binding [GO:0003677]	1	1.51337e-109	293.98	288.79	142.01	-0.68882	16965000000	12640000000	4325600000	343	2.04519	0.0681012	1.74857	0.790616	0.0769202	0.0728501	0.0500979	0.0432042	0.980258	-0.402298	2.85584	3.63127	1.19291	0.887587	0.475149	0.883133	0.445503	0.980258
0.187654	-0.0815931	0.184668	NaN	0.381491	1.14579	NaN	1.5531	1.01447	-0.039948	0.166749	0.0842192	NaN	0.256696	0.420312	S	3	+	Casein kinase II substrate motif;ERK1,2 kinase substrate motif;G protein-coupled receptor kinase 1 substrate motif;Growth associated histone HI kinase substrate motif;GSK-3, ERK1, ERK2, CDK5 substrate motif;PKA kinase substrate motif;PKC kinase substrate motif;Pyruvate dehydrogenase kinase substrate motif;WW domain binding motif	bulk synaptic vesicle endocytosis [GO:0150008];clathrin-dependent synaptic vesicle endocytosis [GO:0150007];cytoskeleton organization [GO:0007010];endosome organization [GO:0007032];gamma-aminobutyric acid transport [GO:0015812];Golgi vesicle uncoating [GO:0048212];inositol phosphate dephosphorylation [GO:0046855];maintenance of presynaptic active zone structure [GO:0048790];muscle contraction [G…	autophagosome [GO:0005776];cytoplasm [GO:0005737];synapse [GO:0045202];terminal bouton [GO:0043195];type I terminal bouton [GO:0061174];vesicle membrane [GO:0012506]";"autolysosome [GO:0044754]	inositol-1,4,5-trisphosphate 5-phosphatase activity [GO:0052658];inositol-polyphosphate 5-phosphatase activity [GO:0004445];nucleic acid binding [GO:0003676];phosphatidylinositol phosphate 5-phosphatase activity [GO:0034595]";phosphatidylinositol-3-phosphatase activity [GO:0004438];phosphatidylinositol-4,5-bisphosphate 5-phosphatase activity [GO:0004439];phosphatidylinositol-4-phosphate phosphata…	1	4.10811e-57	210.28	208.17	210.28	-0.58647	3495300000	2303600000	1191700000	1142	2.04291	0.0682885	1.13874	-0.268164	0.408607	0.425136	1.10581	0.945282	0.793402	-0.241594	3.44656	0.0877262	-0.0265696	0.926406	0.666731	1.84282	1.18688	0.793402
NaN	-0.958713	-1.14075	NaN	-0.749684	-0.546522	NaN	-0.445727	-0.364755	NaN	0.227392	0.157225	NaN	-1.13842	-0.58664	S	3	+	Casein kinase II substrate motif;G protein-coupled receptor kinase 1 substrate motif				1	2.82004e-41	240.21	240.21	49.662	-0.32604	4966300000	4455800000	510490000	400	2.04137	0.0682974	1.20057	1.05484	0.26629	0.214425	0.614935	0.457287	0.232574	-0.187204	2.31437	2.21384	1.24204	1.00625	0.401629	1.63699	0.644491	0.232574
0.293146	0.310486	0.355401	0.310238	0.170091	0.0160576	0.0163217	-0.11172	-0.164199	0.0111775	0.00633235	-0.0347089	-0.265691	0.00870662	0.114223	S	3	+	ERK1,2 kinase substrate motif;G protein-coupled receptor kinase 1 substrate motif;GSK-3, ERK1, ERK2, CDK5 substrate motif;WW domain binding motif	positive regulation of response to oxidative stress [GO:1902884];triglyceride homeostasis [GO:0070328]";"lipid catabolic process [GO:0016042]		hydrolase activity [GO:0016787]	0.998784	3.54758e-45	206.39	201.62	158.99	-0.23712	9591800000	6784500000	2807300000	537	2.03755	0.0686651	0.135215	0.0418543	0.684545	0.213049	0.112706	-0.0389451	1.48319	0.367265	2.41566	3.79655	-0.32541	0.821531	-0.154215	2.69605	-0.40621	1.48319
-0.166518	-0.975361	-0.889727	0.122268	0.156282	-0.103419	0.0334053	-0.175747	-0.291313	0.0788179	0.111721	-0.0549085	-0.430438	-0.75965	-0.464354	S	2	+	Casein kinase I substrate motif;Casein kinase II substrate motif;ERK1,2 kinase substrate motif;G protein-coupled receptor kinase 1 substrate motif;GSK-3, ERK1, ERK2, CDK5 substrate motif;WW domain binding motif	DNA repair [GO:0006281];DNA replication [GO:0006260]";"dendrite morphogenesis [GO:0048813]	nucleus [GO:0005634]";"DNA replication factor C complex [GO:0005663]	DNA binding [GO:0003677];DNA clamp loader activity [GO:0003689]";"ATP binding [GO:0005524]	0.99999	1.58286e-50	242.71	233.68	216.58	-0.42379	31114000000	22186000000	8927600000	48	2.03456	0.0688449	2.16523	0.596691	1.99894	0.609858	1.34681	0.406929	0.171674	-0.125721	5.68265	1.29464	0.722412	1.28156	0.735579	0.908766	0.53265	0.171674
0.649504	0.614422	0.45575	0.15112	-0.0973618	0.0950259	0.354054	-0.0377867	-0.0850678	-0.119254	-0.202361	-0.105396	0.012333	0.457162	0.661454	S	2	+	ERK1,2 kinase substrate motif;GSK-3, ERK1, ERK2, CDK5 substrate motif;MAPKAPK2 kinase substrate motif;WW domain binding motif	compound eye photoreceptor cell differentiation [GO:0001751];flight [GO:0060361];mitochondrion organization [GO:0007005];negative regulation of apoptotic process [GO:0043066];negative regulation of autophagy of mitochondrion [GO:1903147];sarcomere organization [GO:0045214];transmembrane receptor protein tyrosine kinase signaling pathway [GO:0007169]";"antimicrobial humoral response [GO:0019730]	cytosol [GO:0005829];M band [GO:0031430];Z disc [GO:0030018]";"cytoplasm [GO:0005737];integral component of membrane [GO:0016021]	RNA binding [GO:0003723]";"protein kinase binding [GO:0019901];RNA binding [GO:0003723]	0.999888	2.07332e-62	247.9	218.06	184.44	-0.35461	7555300000	5005900000	2549400000	3274	2.03201	0.0690952	1.25642	-0.51932	0.728211	-0.327389	0.562095	-0.299917	0.41623	0.196242	2.96296	3.3648	-0.715562	2.26059	-0.523631	1.51459	-0.496159	0.41623
-0.52455	-0.902991	-0.681505	-0.231074	0.253975	-0.207759	-0.22986	-0.504334	-0.446055	0.140199	0.232781	0.522496	0.108892	-0.648079	0.0183419	S	3	+	b-Adrenergic Receptor kinase substrate motif	translational initiation [GO:0006413]";"formation of cytoplasmic translation initiation complex [GO:0001732];formation of cytoplasmic translation initiation complex [GO:0001732]	eukaryotic 43S preinitiation complex [GO:0016282];eukaryotic 48S preinitiation complex [GO:0033290];eukaryotic translation initiation factor 3 complex [GO:0005852]";"cytosol [GO:0005829];"eukaryotic 43S preinitiation complex [GO:0016282]	translation initiation factor binding [GO:0031369]";"translation initiation factor activity [GO:0003743]	1	2.20447e-237	412.27	405.7	412.27	0.26898	182560000000	154050000000	28505000000	185	2.02852	0.0695724	0.825626	0.472107	0.145386	0.111996	0.362774	-0.219801	0.942641	-0.529401	2.27643	2.48765	1.00151	1.53791	0.641396	1.05478	0.309599	0.942641
0.167099	0.236211	0.35808	-0.241473	0.118747	0.0575263	0.314029	0.564715	0.663361	0.212423	0.205441	0.196615	0.0600502	-0.0696381	0.233145	S	3	+	b-Adrenergic Receptor kinase substrate motif;Casein kinase I substrate motif;Casein kinase II substrate motif;G protein-coupled receptor kinase 1 substrate motif;Pyruvate dehydrogenase kinase substrate motif	translational elongation [GO:0006414]";"cytoplasmic translation [GO:0002181]	cytosolic ribosome [GO:0022626]";"cytosolic large ribosomal subunit [GO:0022625]	structural constituent of ribosome [GO:0003735]	1	5.02081e-77	275.86	269.65	121.33	-0.28454	58030000000	39848000000	18181000000	102	2.0275	0.0695024	0.673589	0.130307	0.272285	-0.096252	1.49562	0.439516	0.79662	0.179278	3.23812	0.36518	-0.0489704	1.03946	-0.27553	1.0356	0.260238	0.79662
0.454597	0.80249	0.662214	0.211431	0.359684	0.0708614	0.700719	0.539481	0.749987	0.149144	0.292684	0.20975	0.292664	0.694687	0.717396	S	2	+	Casein kinase II substrate motif;ERK1,2 kinase substrate motif;G protein-coupled receptor kinase 1 substrate motif;GSK-3, ERK1, ERK2, CDK5 substrate motif;PKA kinase substrate motif;PKC kinase substrate motif;WW domain binding motif	SRP-dependent cotranslational protein targeting to membrane, translocation [GO:0006616]";"dsRNA transport [GO:0033227]	signal recognition particle, endoplasmic reticulum targeting [GO:0005786]	7S RNA binding [GO:0008312]	1	1.22931e-53	234.68	230.41	135.76	0.59895	6218300000	4050800000	2167500000	620	2.02569	0.0696879	1.14581	-0.351056	1.03204	-0.354257	0.24794	0.0951465	0.156608	0.0715181	2.5824	1.74371	-0.422574	1.50333	-0.425775	0.0691729	0.0236284	0.156608
[truncated: 5,836 more rows]
[truncated: 40 more columns]
