# Supplementary material for: Differential regulation of the proteome and phosphoproteome along the dorso-ventral axis of the early Drosophila embryo
Source: eLife. 2024 Sep 2;13:e99263. doi: 10.7554/eLife.99263 (PMC11466282; doi:10.7554/eLife.99263)
Supplement: Supplementary file 5. [file elife-99263-supp5.xlsx]

## Sheet: Sheet1
	proportion along DV axis			interquartile range of deviation distribution
Code_DV	dorsal	lateral	ventral	using Toll10B	using spn27A
1	0	0	1	0.71225	0.572458
2	0	0.05	0.95	0.684574	0.561834
3	0	0.1	0.9	0.660293	0.552784
4	0	0.15	0.85	0.642291	0.543275
5	0	0.2	0.8	0.618063	0.530372
6	0	0.25	0.75	0.603592	0.525309
7	0	0.3	0.7	0.58865	0.521291
8	0	0.35	0.65	0.572385	0.520554
9	0	0.4	0.6	0.555551	0.516357
10	0	0.45	0.55	0.544885	0.515391
11	0	0.5	0.5	0.539876	0.514655
12	0	0.55	0.45	0.538663	0.516142
13	0	0.6	0.4	0.539564	0.51506
14	0	0.65	0.35	0.546137	0.524463
15	0	0.7	0.3	0.552358	0.532677
16	0	0.75	0.25	0.556129	0.541183
17	0	0.8	0.2	0.564289	0.555188
18	0	0.85	0.15	0.571167	0.565187
19	0	0.9	0.1	0.579254	0.580398
20	0	0.95	0.05	0.591526	0.595246
21	0	1	0	0.608167	0.614125
122	0.05	0	0.95	0.686698	0.565142
301	0.05	0.05	0.9	0.659487	0.55648
132	0.05	0.1	0.85	0.639579	0.546107
299	0.05	0.15	0.8	0.621509	0.535877
146	0.05	0.2	0.75	0.600844	0.523687
295	0.05	0.25	0.7	0.584157	0.517004
161	0.05	0.3	0.65	0.564852	0.510176
289	0.05	0.35	0.6	0.546195	0.507461
174	0.05	0.4	0.55	0.538383	0.507268
282	0.05	0.45	0.5	0.530749	0.506913
182	0.05	0.5	0.45	0.524707	0.509167
274	0.05	0.55	0.4	0.526707	0.507917
189	0.05	0.6	0.35	0.528031	0.512767
264	0.05	0.65	0.3	0.5371	0.52405
195	0.05	0.7	0.25	0.539265	0.527765
252	0.05	0.75	0.2	0.548203	0.537762
201	0.05	0.8	0.15	0.560389	0.551136
237	0.05	0.85	0.1	0.563573	0.564271
205	0.05	0.9	0.05	0.575679	0.580304
219	0.05	0.95	0	0.590284	0.596975
22	0.1	0	0.9	0.660099	0.557027
23	0.1	0.05	0.85	0.638536	0.548203
24	0.1	0.1	0.8	0.61843	0.536527
25	0.1	0.15	0.75	0.602682	0.526651
26	0.1	0.2	0.7	0.5794	0.517147
27	0.1	0.25	0.65	0.561706	0.511777
28	0.1	0.3	0.6	0.54407	0.503305
29	0.1	0.35	0.55	0.530074	0.497467
30	0.1	0.4	0.5	0.523666	0.497241
31	0.1	0.45	0.45	0.518844	0.497518
32	0.1	0.5	0.4	0.515968	0.497951
33	0.1	0.55	0.35	0.519664	0.501784
34	0.1	0.6	0.3	0.521845	0.511811
35	0.1	0.65	0.25	0.527678	0.519015
36	0.1	0.7	0.2	0.533748	0.526732
37	0.1	0.75	0.15	0.543615	0.537014
38	0.1	0.8	0.1	0.550721	0.549723
39	0.1	0.85	0.05	0.561014	0.566709
40	0.1	0.9	0	0.572718	0.577912
123	0.15	0	0.85	0.640817	0.550287
297	0.15	0.05	0.8	0.619088	0.538867
133	0.15	0.1	0.75	0.594366	0.527684
293	0.15	0.15	0.7	0.577212	0.519732
148	0.15	0.2	0.65	0.55897	0.508763
287	0.15	0.25	0.6	0.543554	0.502536
163	0.15	0.3	0.55	0.526678	0.496451
280	0.15	0.35	0.5	0.516141	0.493255
175	0.15	0.4	0.45	0.509337	0.493341
272	0.15	0.45	0.4	0.502721	0.494189
183	0.15	0.5	0.35	0.506441	0.49284
262	0.15	0.55	0.3	0.511197	0.502925
190	0.15	0.6	0.25	0.515418	0.505788
250	0.15	0.65	0.2	0.523156	0.516406
197	0.15	0.7	0.15	0.530132	0.526313
235	0.15	0.75	0.1	0.538051	0.539622
203	0.15	0.8	0.05	0.547794	0.553146
217	0.15	0.85	0	0.556496	0.5638
41	0.2	0	0.8	0.620663	0.544137
42	0.2	0.05	0.75	0.598485	0.528094
43	0.2	0.1	0.7	0.569609	0.517621
44	0.2	0.15	0.65	0.551916	0.508979
45	0.2	0.2	0.6	0.536597	0.50011
46	0.2	0.25	0.55	0.52652	0.496116
47	0.2	0.3	0.5	0.516901	0.493537
48	0.2	0.35	0.45	0.504259	0.488873
49	0.2	0.4	0.4	0.496909	0.491138
50	0.2	0.45	0.35	0.497696	0.490651
51	0.2	0.5	0.3	0.501907	0.493159
52	0.2	0.55	0.25	0.503046	0.493789
53	0.2	0.6	0.2	0.506889	0.504501
54	0.2	0.65	0.15	0.514757	0.51418
55	0.2	0.7	0.1	0.523435	0.529466
56	0.2	0.75	0.05	0.53563	0.539541
57	0.2	0.8	0	0.545574	0.554558
124	0.25	0	0.75	0.596909	0.535646
291	0.25	0.05	0.7	0.573344	0.523967
135	0.25	0.1	0.65	0.552472	0.511615
285	0.25	0.15	0.6	0.536292	0.50374
149	0.25	0.2	0.55	0.524003	0.499093
278	0.25	0.25	0.5	0.517403	0.496182
165	0.25	0.3	0.45	0.507756	0.493117
270	0.25	0.35	0.4	0.498422	0.491223
177	0.25	0.4	0.35	0.492952	0.486343
261	0.25	0.45	0.3	0.494211	0.487565
185	0.25	0.5	0.25	0.492336	0.486932
249	0.25	0.55	0.2	0.495631	0.496415
192	0.25	0.6	0.15	0.505011	0.505246
233	0.25	0.65	0.1	0.512647	0.516244
199	0.25	0.7	0.05	0.522126	0.528334
215	0.25	0.75	0	0.532067	0.539588
58	0.3	0	0.7	0.58164	0.53334
59	0.3	0.05	0.65	0.560174	0.516522
60	0.3	0.1	0.6	0.538497	0.506518
61	0.3	0.15	0.55	0.525603	0.497529
62	0.3	0.2	0.5	0.516135	0.497222
63	0.3	0.25	0.45	0.503825	0.493037
64	0.3	0.3	0.4	0.498104	0.490579
65	0.3	0.35	0.35	0.496477	0.486982
66	0.3	0.4	0.3	0.488989	0.481892
67	0.3	0.45	0.25	0.486989	0.484906
68	0.3	0.5	0.2	0.492145	0.489371
69	0.3	0.55	0.15	0.494546	0.495861
70	0.3	0.6	0.1	0.500024	0.504003
71	0.3	0.65	0.05	0.512528	0.518891
200	0.3	0.7	0	0.521483	0.528952
125	0.35	0	0.65	0.567964	0.526377
283	0.35	0.05	0.6	0.55021	0.5161
137	0.35	0.1	0.55	0.532719	0.505341
276	0.35	0.15	0.5	0.519206	0.499226
151	0.35	0.2	0.45	0.506593	0.496352
268	0.35	0.25	0.4	0.496709	0.492268
166	0.35	0.3	0.35	0.492248	0.485551
260	0.35	0.35	0.3	0.490371	0.479551
179	0.35	0.4	0.25	0.481732	0.483521
248	0.35	0.45	0.2	0.486133	0.486406
187	0.35	0.5	0.15	0.490887	0.493304
231	0.35	0.55	0.1	0.49215	0.500538
194	0.35	0.6	0.05	0.504876	0.507424
213	0.35	0.65	0	0.517412	0.525472
73	0.4	0	0.6	0.557735	0.522995
74	0.4	0.05	0.55	0.541508	0.509718
75	0.4	0.1	0.5	0.524509	0.503852
76	0.4	0.15	0.45	0.512124	0.494859
77	0.4	0.2	0.4	0.50012	0.490914
152	0.4	0.2	0.4	0.50012	0.490914
78	0.4	0.25	0.35	0.492383	0.485413
79	0.4	0.3	0.3	0.488219	0.479775
80	0.4	0.35	0.25	0.487091	0.478309
81	0.4	0.4	0.2	0.483841	0.483417
82	0.4	0.45	0.15	0.487248	0.488462
83	0.4	0.5	0.1	0.493235	0.493128
84	0.4	0.55	0.05	0.502071	0.502449
85	0.4	0.6	0	0.508327	0.516004
126	0.45	0	0.55	0.546295	0.52048
275	0.45	0.05	0.5	0.528065	0.508157
138	0.45	0.1	0.45	0.514109	0.498352
267	0.45	0.15	0.4	0.501378	0.494924
153	0.45	0.2	0.35	0.493844	0.48744
258	0.45	0.25	0.3	0.486021	0.481334
168	0.45	0.3	0.25	0.485787	0.478603
246	0.45	0.35	0.2	0.485176	0.480879
180	0.45	0.4	0.15	0.485866	0.488212
229	0.45	0.45	0.1	0.49088	0.492138
188	0.45	0.5	0.05	0.49843	0.496377
212	0.45	0.55	0	0.499361	0.507225
86	0.5	0	0.5	0.537493	0.517702
87	0.5	0.05	0.45	0.519069	0.507058
88	0.5	0.1	0.4	0.506981	0.495019
89	0.5	0.15	0.35	0.495116	0.489512
90	0.5	0.2	0.3	0.486909	0.483271
154	0.5	0.2	0.3	0.486909	0.483271
91	0.5	0.25	0.25	0.482846	0.478629
92	0.5	0.3	0.2	0.484935	0.483624
93	0.5	0.35	0.15	0.490488	0.487467
94	0.5	0.4	0.1	0.493029	0.490672
95	0.5	0.45	0.05	0.491843	0.496
96	0.5	0.5	0	0.49634	0.502458
127	0.55	0	0.45	0.526004	0.515108
266	0.55	0.05	0.4	0.514655	0.50017
139	0.55	0.1	0.35	0.501291	0.492558
257	0.55	0.15	0.3	0.494625	0.489639
155	0.55	0.2	0.25	0.486311	0.488364
244	0.55	0.25	0.2	0.484834	0.484391
170	0.55	0.3	0.15	0.489969	0.485427
227	0.55	0.35	0.1	0.491491	0.496785
181	0.55	0.4	0.05	0.49278	0.495259
211	0.55	0.45	0	0.495129	0.500583
97	0.6	0	0.4	0.523008	0.51181
98	0.6	0.05	0.35	0.509275	0.501026
99	0.6	0.1	0.3	0.499574	0.494409
100	0.6	0.15	0.25	0.489892	0.48911
156	0.6	0.2	0.2	0.485951	0.4895
102	0.6	0.25	0.15	0.48805	0.490028
103	0.6	0.3	0.1	0.49289	0.495278
104	0.6	0.35	0.05	0.496604	0.501778
105	0.6	0.4	0	0.495836	0.500952
128	0.65	0	0.35	0.51884	0.506822
255	0.65	0.05	0.3	0.506431	0.499102
140	0.65	0.1	0.25	0.499941	0.496192
242	0.65	0.15	0.2	0.491722	0.494761
157	0.65	0.2	0.15	0.492811	0.494797
225	0.65	0.25	0.1	0.493411	0.496123
172	0.65	0.3	0.05	0.498166	0.50337
210	0.65	0.35	0	0.501657	0.507349
106	0.7	0	0.3	0.520034	0.510901
107	0.7	0.05	0.25	0.507844	0.503734
108	0.7	0.1	0.2	0.500113	0.501262
109	0.7	0.15	0.15	0.493722	0.498361
110	0.7	0.2	0.1	0.495588	0.501488
111	0.7	0.25	0.05	0.495358	0.502618
112	0.7	0.3	0	0.504641	0.50896
129	0.75	0	0.25	0.513971	0.515463
240	0.75	0.05	0.2	0.506624	0.511451
142	0.75	0.1	0.15	0.501076	0.507955
223	0.75	0.15	0.1	0.496922	0.505803
159	0.75	0.2	0.05	0.500239	0.505822
209	0.75	0.25	0	0.502819	0.507591
113	0.8	0	0.2	0.516058	0.522179
114	0.8	0.05	0.15	0.510086	0.52023
115	0.8	0.1	0.1	0.508721	0.515381
116	0.8	0.15	0.05	0.508764	0.511282
160	0.8	0.2	0	0.505615	0.510662
130	0.85	0	0.15	0.524874	0.532359
221	0.85	0.05	0.1	0.515582	0.522819
144	0.85	0.1	0.05	0.515581	0.519022
208	0.85	0.15	0	0.513658	0.519291
118	0.9	0	0.1	0.532286	0.5376
119	0.9	0.05	0.05	0.524934	0.527985
145	0.9	0.1	0	0.522237	0.525714
131	0.95	0	0.05	0.539768	0.542095
207	0.95	0.05	0	0.53397	0.540672
121	1	0	0	0.545871	0.549242
