# Supplementary material for: Differential regulation of the proteome and phosphoproteome along the dorso-ventral axis of the early Drosophila embryo
Source: eLife. 2024 Sep 2;13:e99263. doi: 10.7554/eLife.99263 (PMC11466282; doi:10.7554/eLife.99263)
Supplement: Supplementary file 6. — For each experiment (LFQ/Proteomics, SILAC-phosphoproteomics), there is a list of the deviation values of the complete (ANOVA positive and negative) and regulated (ANOVA positive) proteins or phosphosites. [file elife-99263-supp6.xlsx]

## Sheet: LFQ_Deviation_Anova+&-
LFQ_ID	Uniprot ID	Majority protein IDs	Log2 Deviation DLVtl	Log2 Deviation DLVsp
0	A0A023GPN3;Q9VS48;Q7YTZ1	A0A023GPN3;Q9VS48;Q7YTZ1	0.889939	0.963641
1	A0A023GQ99;Q9VJ62	A0A023GQ99;Q9VJ62	0.752134	0.757196
2	A0A023GQA5;P24156	A0A023GQA5;P24156	-0.434737	-0.455122
5	A8DY50;A0A0B4K7H4;A0A0B4JCQ4;A1Z6S0;A0A0B4KEK0;A0A0B4KEE8;A0A0B4K7T1;A0A0B4JCZ8;E1JGY9;A0A0B4JD47;A0A0B4K822;A0A0B4KEU9;A0A0B4KE... <Preview truncated at 128 characters>	A8DY50;A0A0B4K7H4;A0A0B4JCQ4;A1Z6S0;A0A0B4KEK0;A0A0B4KEE8;A0A0B4K7T1;A0A0B4JCZ8;E1JGY9;A0A0B4JD47;A0A0B4K822	0.585544	0.674936
6	A0A0B4JD24;A0A0B4JCR9;Q7JQT8	A0A0B4JD24;A0A0B4JCR9;Q7JQT8	0.39783	0.276024
7	A0A0B4JCT8;Q9V780	A0A0B4JCT8;Q9V780	0.402279	0.321737
8	A0A0B4JCU5;Q9W1W9	A0A0B4JCU5;Q9W1W9	-1.01181	-1.08843
9	A0A0B4JCU8;Q9V8M5	A0A0B4JCU8;Q9V8M5	-0.285332	-0.304042
11	A0A0B4JCW4;Q9VHJ8;A0A126GUR6;Q95U38	A0A0B4JCW4;Q9VHJ8;A0A126GUR6;Q95U38	0.189784	0.242316
12	Q8IN56;Q9I7I8;A0A0B4JDD8;A0A0B4JDG2;B7Z0M9;Q7KSB3;A0A0B4JCZ0	Q8IN56;Q9I7I8;A0A0B4JDD8;A0A0B4JDG2;B7Z0M9;Q7KSB3;A0A0B4JCZ0	0.631789	0.540904
13	A0A0B4JCZ1	A0A0B4JCZ1	-1.08585	-1.1006
15	A0A0B4JCZ3	A0A0B4JCZ3	-0.771382	-0.784745
16	A0A126GV04;A0A0B4JCZ4;Q24547	A0A126GV04;A0A0B4JCZ4;Q24547	0.237356	0.321493
17	A0A0B4JD00;A8DY69;E5DK16;A0A0B4JD31;A0A0B4JCQ5;Q8SXP0;A0A0B4JCS1;A0A0B4JD27;I0E2I4	A0A0B4JD00;A8DY69;E5DK16;A0A0B4JD31;A0A0B4JCQ5;Q8SXP0;A0A0B4JCS1;A0A0B4JD27;I0E2I4	0.229711	0.221944
18	A0A0B4LHP1;A0A0B4JD02;A0A0B4JDF1;P16371;A0A0B4KH09;A0A0B4K6L6	A0A0B4LHP1;A0A0B4JD02;A0A0B4JDF1;P16371;A0A0B4KH09;A0A0B4K6L6	-0.117257	-0.0353996
19	A0A0B4JD11;Q9NJH0	A0A0B4JD11;Q9NJH0	-0.180098	-0.1668
21	A0A0B4JD23;Q8IMI0;A0A0B4JDE3;Q9VA53;A0A0B4KHJ3;A0A0B4KHF5	A0A0B4JD23;Q8IMI0;A0A0B4JDE3;Q9VA53;A0A0B4KHJ3;A0A0B4KHF5	-0.41389	-0.565429
22	A0A0B4JD33;A0A0B4JD03	A0A0B4JD33;A0A0B4JD03	-0.177411	-0.191151
23	A0A0B4JD46;Q8T8R1	A0A0B4JD46;Q8T8R1	-0.126865	-0.0684071
24	A0A0B4JD58;A1Z7Q6;A1Z7Q5;A0A0B4JD05;A0A0B4K840;C8VV76	A0A0B4JD58;A1Z7Q6;A1Z7Q5;A0A0B4JD05;A0A0B4K840;C8VV76	0.870961	0.789081
25	A0A0B4LGR2;A0A0B4JDA1;Q9VN58;A0A0B4LHQ4;A0A0B4JD62;A0A0B4JDB5;A0A0B4LGQ5;A0A0B4JCW5;A0A0B4JCV6	A0A0B4LGR2;A0A0B4JDA1;Q9VN58;A0A0B4LHQ4;A0A0B4JD62;A0A0B4JDB5;A0A0B4LGQ5;A0A0B4JCW5;A0A0B4JCV6	0.252735	0.242785
26	Q8T3K5;A0A0B4JDB9;C1C3I0;E1JIV5	Q8T3K5;A0A0B4JDB9;C1C3I0;E1JIV5	-0.31023	-0.206289
27	A0A0B4JDC3;Q9VGU5	A0A0B4JDC3;Q9VGU5	0.0156033	0.0580258
28	A0A0B4JDC8;Q9VFD3	A0A0B4JDC8;Q9VFD3	0.961705	1.42989
29	A0A0B4JDE8;Q9VF71	A0A0B4JDE8;Q9VF71	0.687007	0.553463
30	A0A0B4JDF4;Q9VAL5;P35832	A0A0B4JDF4;Q9VAL5;P35832	0.795562	0.938994
31	A0A126GUZ1;A0A0B4JDG4	A0A126GUZ1;A0A0B4JDG4	-0.16229	-0.0424358
32	A0A0B4K5Z5;P25153	A0A0B4K5Z5;P25153	-0.356409	-0.215087
33	E1JJ72;A0A0B4LGU9;A0A0B4K602;P51123	E1JJ72;A0A0B4LGU9;A0A0B4K602;P51123	0.27246	0.294632
35	A0A0B4K618	A0A0B4K618	-0.635402	-0.531764
37	A0A0B4K652;P36958	A0A0B4K652;P36958	0.293078	0.23748
38	A0A0B4K657;Q6XK20;B7Z0K1	A0A0B4K657	0.195141	-0.149406
39	A0A0B4K661;A0A0B4KG68	A0A0B4K661;A0A0B4KG68	-0.181657	-0.26885
40	Q0KI68;E1JIM0;A4V2Z1;A0A0B4K690;A0A0B4K663;E2QD16;E1JIM1;A0A0B4K6Z4;A0A0B4K6I8	Q0KI68;E1JIM0;A4V2Z1;A0A0B4K690;A0A0B4K663;E2QD16;E1JIM1;A0A0B4K6Z4;A0A0B4K6I8	1.04398	1.04793
41	A0A0B4K664;Q9VEZ3;A0A0B4K700;E1JIM4;REV__Q7JX87;REV__A1Z893;REV__A1Z892	A0A0B4K664;Q9VEZ3;A0A0B4K700;E1JIM4	0.0952272	0.142886
42	A0A0B4K680;Q9VFK6	A0A0B4K680;Q9VFK6	-0.646917	-0.869614
43	A0A0B4K682;A0A0B4K6H8;Q9VFG3;A0A0B4K6X6;Q6NNB4;Q7KSJ6	A0A0B4K682;A0A0B4K6H8;Q9VFG3;A0A0B4K6X6;Q6NNB4;Q7KSJ6	0.828481	0.922124
44	Q9XZ01;A0A0B4K692	Q9XZ01;A0A0B4K692	1.08402	1.03196
45	Q86BR9;Q86NK8;A0A0B4K7C4;A0A0B4K697;A0A0B4KHL4;Q4AB31;Q8IHB0;Q8INB6;Q9VYN5	Q86BR9;Q86NK8;A0A0B4K7C4;A0A0B4K697;A0A0B4KHL4;Q4AB31;Q8IHB0;Q8INB6	0.0220478	-0.0119318
49	A0A0B4KHM3;A0A0B4K6C1;Q0KI30;Q8SZS0;A0A0B4KHV7;A0A0B4KH49	A0A0B4KHM3;A0A0B4K6C1;Q0KI30;Q8SZS0;A0A0B4KHV7	1.08022	0.896049
50	A0A0B4K6C3;Q9VHS2	A0A0B4K6C3;Q9VHS2	-0.443554	-0.441264
51	A0A0B4K6D2;Q9VH95	A0A0B4K6D2;Q9VH95	0.154694	0.198924
53	Q9VG78;A0A0B4K6G3	Q9VG78;A0A0B4K6G3	0.14143	0.255362
54	A0A0B4K6G6;Q9VG05;A0A0B4K6U2;E1JIJ7;Q8INH9	A0A0B4K6G6;Q9VG05;A0A0B4K6U2;E1JIJ7;Q8INH9	0.488261	0.516422
56	A0A0B4K6I5;Q9VN45	A0A0B4K6I5;Q9VN45	0.0445257	-0.15647
59	A0A0B4K6K7;Q9VI55	A0A0B4K6K7;Q9VI55	-0.23204	-0.0998413
60	A0A0B4K6L4;Q27601;Q9VRZ1	A0A0B4K6L4;Q27601	0.157786	0.141536
61	E1JIZ2;A0A0B4K6M4;A0A0B4K7W1;A0A0B4K784;E1JIZ1;E1JIZ0	E1JIZ2;A0A0B4K6M4;A0A0B4K7W1;A0A0B4K784;E1JIZ1;E1JIZ0	0.0742158	0.0641185
62	A0A0B4K6M7;Q9VHA0	A0A0B4K6M7;Q9VHA0	-0.247244	-0.270351
63	A0A0B4K6M9;Q9VB70;A0A0B4LHZ6	A0A0B4K6M9;Q9VB70;A0A0B4LHZ6	0.844757	0.733825
64	A0A0B4K6N1;Q8MLY8	A0A0B4K6N1;Q8MLY8	-0.277834	-0.321215
65	A8JRH3;A0A0B4K6N4;O46231;E1JJ21;Q9VA56;Q9VA58;C7LAH8;A0A0B4KHF2;Q9VA59;A0A0B4K7R6;A0A0B4KHW6	A8JRH3;A0A0B4K6N4;O46231;E1JJ21;Q9VA56;Q9VA58;C7LAH8;A0A0B4KHF2;Q9VA59;A0A0B4K7R6;A0A0B4KHW6	-0.14147	-0.118869
66	A0A0B4K6N5;A0A0B4K6V6;P48456	A0A0B4K6N5;A0A0B4K6V6;P48456	1.28812	1.1916
67	A0A0B4K6N7;Q9VE34	A0A0B4K6N7;Q9VE34	0.142109	0.174179
68	A0A0B4K6R3;Q8IH24	A0A0B4K6R3;Q8IH24	0.602619	0.238239
69	A0A0B4K6R7;Q9VDG5;A0A0B4LHD7;A0A0B4K6A6;A0A0B4K790;A0A0B4K6E2;A0A0B4LHD9	A0A0B4K6R7;Q9VDG5;A0A0B4LHD7;A0A0B4K6A6;A0A0B4K790;A0A0B4K6E2;A0A0B4LHD9	1.60691	1.4665
71	A0A0B4K6V1;Q9VA73	A0A0B4K6V1;Q9VA73	1.26395	1.19354
73	A0A0B4K6W1;P08970	A0A0B4K6W1;P08970	0.0948293	-0.036922
75	A0A0B4K6X3;A1Z6E0	A0A0B4K6X3;A1Z6E0	0.410082	0.257999
76	A0A0B4K6X7;A1Z8J0;E8NH71	A0A0B4K6X7;A1Z8J0;E8NH71	-0.0879615	-0.11259
77	A0A0B4K6Y4;Q86B79	A0A0B4K6Y4;Q86B79	0.251027	0.318466
78	A0A0B4K6Y7;Q9VHK3;Q8INQ0;A8JQV7	A0A0B4K6Y7;Q9VHK3;Q8INQ0;A8JQV7	0.10025	0.0231939
80	Q0E9B2;A1Z904;A1Z906;E2QCB7;A1Z907;A0A0B4K6Z2;A8DYB7	Q0E9B2;A1Z904;A1Z906;E2QCB7;A1Z907;A0A0B4K6Z2;A8DYB7	1.6007	1.70159
82	A0A0B4K726;Q960E8	A0A0B4K726;Q960E8	0.429845	0.360854
83	A0A0B4K730;E2QC90;Q7JUY7;E0R983	A0A0B4K730;E2QC90;Q7JUY7;E0R983	0.185038	0.156271
84	A0A0B4K739	A0A0B4K739	0.152507	0.549985
85	A0A0B4LF82;Q5U0Y0;A0A0B4K765;A0A0B4LF93;A1Z928;A1Z927;A0A126GUN9	A0A0B4LF82;Q5U0Y0;A0A0B4K765;A0A0B4LF93;A1Z928;A1Z927;A0A126GUN9	0.262159	0.228396
86	A0A0B4KH51;Q9Y0S9;A0A0B4K774	A0A0B4KH51;Q9Y0S9;A0A0B4K774	0.403593	0.536878
87	A0A0B4K876;A0A0B4K7Z6;A0A0B4K7A3;Q7YU81;A0A0B4K7Q9	A0A0B4K876;A0A0B4K7Z6;A0A0B4K7A3;Q7YU81	-0.609447	-0.484318
88	A0A0B4K7B6	A0A0B4K7B6	0.951616	0.131402
92	A0A0B4K7D8;Q7K161	A0A0B4K7D8;Q7K161	-0.374889	-0.350641
93	A0A0B4K7G1;A1ZB80;A1ZB77;A0A0B4LGX1;A0A0B4K897;E1JGL5;A1ZB83	A0A0B4K7G1;A1ZB80;A1ZB77;A0A0B4LGX1;A0A0B4K897;E1JGL5;A1ZB83	0.0149846	-0.0519755
94	A0A0B4K7G4;P13469	A0A0B4K7G4;P13469	-0.856468	-0.818424
96	A0A0B4K7H0;Q7KN74	A0A0B4K7H0;Q7KN74	0.431037	0.581805
97	Q9VBU7;A0A0B4K7J2	Q9VBU7;A0A0B4K7J2	0.0876328	0.083564
98	Q95U21;Q7JQ36;A0A0B4K7J3	Q95U21;Q7JQ36;A0A0B4K7J3	0.217759	0.243243
99	A0A0B4K7K6;Q9VBG6	A0A0B4K7K6;Q9VBG6	-0.100396	-0.110665
100	A0A0B4K7K7;Q9V576	A0A0B4K7K7;Q9V576	0.146016	0.18557
101	A0A0B4K7L0	A0A0B4K7L0	-0.0395606	0.0127639
102	A0A0B4K7P1;Q9N6D8;Q8IMZ4	A0A0B4K7P1;Q9N6D8;Q8IMZ4	0.0524252	-0.133888
103	A0A0B4K7Q6;Q9VCH4	A0A0B4K7Q6;Q9VCH4	-1.44126	-1.46411
104	A0A0B4K7R1;Q9VCA9	A0A0B4K7R1;Q9VCA9	-0.366793	-0.325003
105	A0A0B4K7R5;E1JH79;Q9NKV0	A0A0B4K7R5;E1JH79;Q9NKV0	0.22681	-0.0186591
106	A0A0B4KHS1;A0A0B4K7R8;P10040	A0A0B4KHS1;A0A0B4K7R8;P10040	-0.0882954	-0.0974374
107	A0A0B4K7S0;P55824;A0A0B4K6W2	A0A0B4K7S0;P55824;A0A0B4K6W2	0.0795099	0.116238
108	A0A0B4K7S5;P83098	A0A0B4K7S5;P83098	0.858443	0.941755
109	A0A0B4K7T7;A1ZAN6;A0A0B4LFF8;A1ZAN7	A0A0B4K7T7;A1ZAN6;A0A0B4LFF8;A1ZAN7	-0.0316569	0.0960875
110	A0A0B4K7V5;P91622;A0A0B4KFG2;A8DY78	A0A0B4K7V5;P91622;A0A0B4KFG2;A8DY78	0.163085	0.143766
111	A0A0B4K7X5;A0A0B4LFW5;Q9W2J6;A0A0B4LG72;A0A0B4LG29;E1JGQ3	A0A0B4K7X5;A0A0B4LFW5;Q9W2J6;A0A0B4LG72;A0A0B4LG29;E1JGQ3	0.683177	0.456464
112	A0A0B4KFL2;A1Z9E0;A1Z9D9;A0A0B4K7Y4	A0A0B4KFL2;A1Z9E0;A1Z9D9;A0A0B4K7Y4	-0.261023	-0.220606
113	A0A0B4K7Y7;Q9VAW5;A0A0B4K6K9	A0A0B4K7Y7;Q9VAW5;A0A0B4K6K9	0.400134	0.356511
114	A0A0B4K7Z5;Q7KLV9	A0A0B4K7Z5;Q7KLV9	0.258343	0.33874
117	A0A0B4K812;Q7KNS3	A0A0B4K812;Q7KNS3	-0.117297	-0.0558557
118	A0A0B4K833;Q24214;M9NFW6;P48451	A0A0B4K833;Q24214;M9NFW6;P48451	0.169047	0.233719
119	A0A0B4K859;A1Z945	A0A0B4K859;A1Z945	-0.0289491	-0.0250126
120	A0A0B4K863;A1Z9D4;A0A0B4K7N9;A1Z9D3;P54623;A0A0B4K773;A0A0B4K705;E1JH56;Q9V9R6;Q7KRS6	A0A0B4K863;A1Z9D4;A0A0B4K7N9;A1Z9D3;P54623	0.056881	0.057011
121	A0A0B4K882;Q7K2Y9	A0A0B4K882;Q7K2Y9	0.3777	0.370967
122	A0A0B4K883;Q9W123	A0A0B4K883;Q9W123	-0.141123	-0.0923205
123	A0A0B4K885	A0A0B4K885	-0.191439	-0.246555
124	A0A0B4K891;Q7K581	A0A0B4K891;Q7K581	0.091033	0.0883168
125	A0A0B4K8A5;Q9W2F2	A0A0B4K8A5;Q9W2F2	0.167173	0.212557
127	A0A0B4KEH8;A0A0B4KEC2;Q9W5H8;Q5LJQ4	A0A0B4KEH8;A0A0B4KEC2;Q9W5H8;Q5LJQ4	0.0552631	0.171414
128	A1Z6E6;A0A0B4KEC3;Q7K3G5;Q0E9P4	A1Z6E6;A0A0B4KEC3;Q7K3G5;Q0E9P4	0.184865	0.182379
129	A0A0B4KED0;Q9W5N2	A0A0B4KED0;Q9W5N2	-1.0126	-0.989689
130	A0A0B4KED9;O16844	A0A0B4KED9;O16844	-0.121904	-0.0139263
131	A1Z6Z3;A0A0B4KEE1;Q7JR61;A0A0B4KEL0;A0A0B4KF99;A4UZ69;A1Z6Z4;A0A0C4FEI5;A0A0C4DHC8	A1Z6Z3;A0A0B4KEE1;Q7JR61;A0A0B4KEL0;A0A0B4KF99;A4UZ69;A1Z6Z4;A0A0C4FEI5;A0A0C4DHC8	0.289988	0.321788
132	A0A0B4KEE4;A1Z6Q1	A0A0B4KEE4;A1Z6Q1	0.138384	0.0889198
133	A0A0B4KEN1;A1Z7N4;A0A0B4KEF7;A0A0B4LEX2	A0A0B4KEN1;A1Z7N4;A0A0B4KEF7;A0A0B4LEX2	-0.297225	-0.0766404
134	A0A0B4KF27;A0A0B4KFF1;A0A0B4KEH3;Q7JW73;A0A0B4KEG0	A0A0B4KF27;A0A0B4KFF1;A0A0B4KEH3;Q7JW73;A0A0B4KEG0	-0.150615	-0.223209
135	A0A0B4KEG9;A1Z7G7;E1JH11;A0A0B4K6T3;A0A0B4KEF5;A0A0B4K7U8	A0A0B4KEG9;A1Z7G7;E1JH11;A0A0B4K6T3;A0A0B4KEF5;A0A0B4K7U8	0.782364	0.762288
136	A0A0B4KEH0;P29310	A0A0B4KEH0;P29310	-0.42677	-0.377337
140	A0A0B4KEK1;Q0E9C2;A0A0B4KET9;A0A0B4KFP2	A0A0B4KEK1;Q0E9C2;A0A0B4KET9;A0A0B4KFP2	-0.600281	-0.635166
142	A0A0B4KEK7;Q9V637	A0A0B4KEK7;Q9V637	0.188165	0.0627305
143	A1Z742;A0A0B4KEL9;A1Z741;D1Z396;A0A0B4KFB9;Q7JUR6	A1Z742;A0A0B4KEL9;A1Z741;D1Z396;A0A0B4KFB9;Q7JUR6	0.453068	0.586977
145	Q7K014;A0A0B4KEP6	Q7K014;A0A0B4KEP6	0.919432	1.06826
146	Q5U156;A0A0B4KER0;Q95RL2	Q5U156;A0A0B4KER0;Q95RL2	0.0147301	0.0517551
147	A0A0B4KER9;Q9V730;D5SHU8	A0A0B4KER9;Q9V730	0.228272	0.0103636
148	A0A0B4KES0;P24014	A0A0B4KES0;P24014	-0.0764731	-0.172012
150	A0A0B4KG58;B7YZJ2;E1JH90;A0A0B4KET5;A0A0B4KFA4;E1JH91;A0A0B4KEY4;A0A0B4KFU3;B7YZJ1;A1ZAU8;A0A0B4KEY6	A0A0B4KG58;B7YZJ2;E1JH90;A0A0B4KET5;A0A0B4KFA4;E1JH91;A0A0B4KEY4;A0A0B4KFU3;B7YZJ1;A1ZAU8;A0A0B4KEY6	0.347932	0.24709
151	Q9N693;E1JGL0;A0A0B4KEU2;Q9NBW0;A1ZB51	Q9N693;E1JGL0;A0A0B4KEU2	0.223778	0.195303
152	Q7JVY0;A0A0B4KEU5	Q7JVY0;A0A0B4KEU5	-0.0602017	-0.0670081
153	A0A0B4KEV9;A8DYK1;Q9W2Q7;A0A0B4LH15	A0A0B4KEV9;A8DYK1;Q9W2Q7;A0A0B4LH15	-0.0817638	-0.339127
154	A0A0B4KEX6;Q9W205;A0A0B4KFF9;E1JGS7	A0A0B4KEX6;Q9W205;A0A0B4KFF9;E1JGS7	-0.108777	-0.346777
156	A1ZAZ9;A0A0B4KEY8	A1ZAZ9;A0A0B4KEY8	0.014208	0.0501751
159	Q7JZN2;A1ZBD6;A0A126GUP9;A0A0C4DHG8;A0A0B4KEZ6	Q7JZN2;A1ZBD6;A0A126GUP9;A0A0C4DHG8;A0A0B4KEZ6	-0.57359	-0.68537
160	A0A0B4KEZ9;Q9V8P9	A0A0B4KEZ9;Q9V8P9	0.591736	0.447976
161	A0A0B4KF05;Q9V359	A0A0B4KF05;Q9V359	0.426603	0.370134
162	Q9W214;A0A0B4KF28	Q9W214;A0A0B4KF28	0.767199	0.861062
163	A0A0B4KF31;Q9W1X9	A0A0B4KF31;Q9W1X9	0.676068	0.561943
164	Q9VNC4;A0A0B4KF34;Q8T3H9;A0A126GUQ9	Q9VNC4;A0A0B4KF34	0.866606	0.941156
165	A0A0B4KF46	A0A0B4KF46	-0.418749	-0.369343
166	A0A0B4KF57;Q9VMY8;A0A0B4KG14	A0A0B4KF57;Q9VMY8;A0A0B4KG14	0.116537	0.0726386
167	Q9VI61;A0A0B4KF76;Q8INT1;A0A0B4KFQ4;E1JJ75;E1JJ76;A8JQU7;Q7KSZ0;A0A0B4KFD2;Q9VI63;A0A0B4KGB4;A8JQU6;A0A0B4KGP1	Q9VI61;A0A0B4KF76;Q8INT1;A0A0B4KFQ4;E1JJ75;E1JJ76;A8JQU7;Q7KSZ0;A0A0B4KFD2;Q9VI63;A0A0B4KGB4;A8JQU6;A0A0B4KGP1	0.631602	0.695677
168	Q7JQL5;A0A0B4KF86	Q7JQL5;A0A0B4KF86	0.0388278	0.258226
170	Q8T0M2;Q0E9C6;A0A0B4KFA3;A8DY98;A8DY97	Q8T0M2;Q0E9C6;A0A0B4KFA3;A8DY98;A8DY97	0.538534	0.741478
171	Q9VHX9;A0A0B4KFA6	Q9VHX9;A0A0B4KFA6	0.0669727	0.0889221
172	A0A0B4KFB8;A0A0B4LGR1;Q9VI14;Q6NN86	A0A0B4KFB8	-0.0632754	-0.0778638
173	Q0E9C5;A1Z8F4;A0A0B4KFC0	Q0E9C5;A1Z8F4;A0A0B4KFC0	1.00853	0.731159
174	Q7KF43;A0A0B4KFC4	Q7KF43;A0A0B4KFC4	0.00321251	0.195285
175	A1Z7C4;A0A0B4KFD1	A1Z7C4;A0A0B4KFD1	0.346904	0.440817
176	A0A0B4KFD5	A0A0B4KFD5	-0.180758	-0.0879783
177	Q9W2N8;A0A0B4KFE1;Q86BG2	Q9W2N8;A0A0B4KFE1;Q86BG2	-0.484362	-0.445024
178	B7Z0U7;A0A0B4KFE2;E1JJ78;A0A0B4KF90;A0A0B4KGC6;A0A0B4K6V2;A0A0B4K631;A0A0B4K603;Q9VI75	B7Z0U7;A0A0B4KFE2;E1JJ78;A0A0B4KF90;A0A0B4KGC6;A0A0B4K6V2;A0A0B4K631;A0A0B4K603;Q9VI75	0.0789719	0.0366256
179	A1Z7H3;Q8T3L1;A1Z7H2;A0A0B4KFE4	A1Z7H3;Q8T3L1;A1Z7H2;A0A0B4KFE4	-0.0845828	-0.0843866
180	A0A0B4KFE5;Q04448	A0A0B4KFE5;Q04448	-0.295045	-0.348806
181	Q0E901;A0A0B4KFE6;A0A0B4KEW2	Q0E901;A0A0B4KFE6;A0A0B4KEW2	0.735557	0.897674
183	A0A0B4KFE9;A1Z8P9	A0A0B4KFE9;A1Z8P9	-0.0071401	-0.00786142
184	A0A0B4KFF0;P25822;A0A0B4KFX7;A0A0B4K612	A0A0B4KFF0;P25822;A0A0B4KFX7;A0A0B4K612	0.1202	0.128015
185	Q7K304;A0A0B4KFF6;A8DY77	Q7K304;A0A0B4KFF6;A8DY77	0.0548207	0.0382811
186	A0A0B4KFG0;Q24451	A0A0B4KFG0;Q24451	1.12404	1.24024
187	Q9W1W8;A0A0B4KFG3	Q9W1W8;A0A0B4KFG3	0.908242	0.806409
188	A0A0B4KGE6;A0A0B4KFH4;P26270	A0A0B4KGE6;A0A0B4KFH4;P26270	0.0195377	-0.00196225
189	A0A0B4KFH5;Q8MKL1	A0A0B4KFH5;Q8MKL1	0.1523	0.0682938
191	A0A0B4KFI0;Q9VHN3	A0A0B4KFI0;Q9VHN3	0.589061	0.291198
192	A0A0B4KFJ2;O15945	A0A0B4KFJ2;O15945	0.184093	0.16094
193	A0A0B4KFJ7;Q9VHH9	A0A0B4KFJ7;Q9VHH9	-0.187409	-0.305528
194	A0A0B4KFJ8;E1JH52;Q9V6L0	A0A0B4KFJ8;E1JH52;Q9V6L0	0.0102027	0.0570806
195	A0A0B4KFL0	A0A0B4KFL0	0.517921	0.393005
196	Q9VN89;A0A0B4KFL3;Q961H1;E1JJ62;Q9VNI0;Q4QPP5	Q9VN89;A0A0B4KFL3	-0.217723	-0.110709
197	A0A0B4KFN0;P49905	A0A0B4KFN0;P49905	0.0287592	0.00717297
200	A0A0B4KFP4;Q8INR6	A0A0B4KFP4;Q8INR6	0.738356	0.838501
202	Q6NR36;A0A0B4KFQ3	Q6NR36;A0A0B4KFQ3	-0.136788	-0.330038
204	A0A0B4KFR1;Q9VGR7	A0A0B4KFR1;Q9VGR7	0.0588843	0.0238399
205	A4UZI0;A0A0B4LGK5;A1ZA18;A0A0B4KFR5;A0A0B4KG24	A4UZI0;A0A0B4LGK5;A1ZA18;A0A0B4KFR5;A0A0B4KG24	-0.679668	-0.667713
206	A0A0B4KGU0;A0A0B4KFR6;Q9VGK7	A0A0B4KGU0;A0A0B4KFR6;Q9VGK7	0.0939766	0.100032
207	A0A0B4KFS3;Q8T4A5	A0A0B4KFS3;Q8T4A5	0.649882	0.855415
208	A0A0B4KFT0;Q94514	A0A0B4KFT0;Q94514	-0.434281	-0.556221
211	Q7KNS5;A0A0B4KFT9	Q7KNS5;A0A0B4KFT9	0.738796	0.83854
213	A0A0B4KFU5;Q9V853	A0A0B4KFU5;Q9V853	-0.211738	-0.223057
214	A0A126GUN5;A0A0B4KFU8;Q6AWG9	A0A126GUN5;A0A0B4KFU8;Q6AWG9	0.28662	0.331412
216	Q7JW01;A0A0B4KFV4	Q7JW01;A0A0B4KFV4	-0.0273536	-0.126932
217	A0A0B4KFW0;Q8T0S6	A0A0B4KFW0;Q8T0S6	-0.0292334	-0.0270146
218	Q7KSK8;Q9V3X1;A0A0B4KFW1;A0A0B4KG03;A8JQZ7;A0A0B4KGK9;A8JQZ8;Q6NLJ7	Q7KSK8;Q9V3X1;A0A0B4KFW1;A0A0B4KG03;A8JQZ7;A0A0B4KGK9	0.406236	0.535585
219	A0A0B4KFX0	A0A0B4KFX0	0.312659	0.31652
220	A0A0B4KFX5	A0A0B4KFX5	1.06088	0.913464
221	Q9W1Y0;A0A0B4KFY4;F3YDF1	Q9W1Y0;A0A0B4KFY4;F3YDF1	0.175131	0.201771
222	A0A0B4KFZ0;P81928	A0A0B4KFZ0;P81928	0.267037	0.418312
223	A0A0B4KFZ9;P84040	A0A0B4KFZ9;P84040	-0.0546377	-0.00515953
224	A0A0B4KG16;Q9VF36	A0A0B4KG16;Q9VF36	0.790877	0.79379
225	A0A0B4KG41;Q9VES1	A0A0B4KG41;Q9VES1	-0.927766	-0.793434
226	A0A0B4KG52;Q9VFJ3	A0A0B4KG52;Q9VFJ3	-0.0338235	-0.0558791
227	Q24468;A0A0B4KG59	Q24468;A0A0B4KG59	-0.241901	-0.23657
228	Q9VF92;A0A0B4KG69	Q9VF92;A0A0B4KG69	0.333279	0.376968
229	A0A0B4KG76;Q9VNG9;Q8IPP5;A0A0B4KGK7;E1JJ52	A0A0B4KG76;Q9VNG9;Q8IPP5;A0A0B4KGK7;E1JJ52	0.281821	0.479011
231	A0A0B4KG83;Q9VEC3	A0A0B4KG83;Q9VEC3	-0.315869	-0.45294
232	A0A0B4KG85	A0A0B4KG85	-0.0886108	-0.295128
233	A0A0B4KG87;Q6NQZ7	A0A0B4KG87;Q6NQZ7	0.326632	0.310677
234	Q9N6D7;A0A0B4KG96	Q9N6D7;A0A0B4KG96	-0.0402611	-0.0631562
235	E0R905;Q7KSP5;A0A0B4KGA3;A0A0B4K6S1;A0A0B4K6F4;Q8SZN9	E0R905;Q7KSP5;A0A0B4KGA3;A0A0B4K6S1;A0A0B4K6F4;Q8SZN9	-0.494857	-0.726659
236	Q8IN65;Q9VDT8;A0A0B4KGC9;A0A0B4KHF1;E1JIQ4;A0A0B4KGH7	Q8IN65;Q9VDT8;A0A0B4KGC9;A0A0B4KHF1;E1JIQ4;A0A0B4KGH7	0.204621	0.208295
237	O61602;Q9W1M6;A0A0B4KGD0;Q8MLR4	O61602;Q9W1M6;A0A0B4KGD0;Q8MLR4	0.237461	0.152091
238	A0A0B4KGD7;A0A0B4K6D6;A0A0B4K778;A0A0B4K698;Q9U1H0	A0A0B4KGD7;A0A0B4K6D6;A0A0B4K778;A0A0B4K698;Q9U1H0	0.369658	0.264711
239	A0A0B4KHS7;A0A0B4KGE1;Q24151;A0A0B4KHS6;A0A0B4KH10	A0A0B4KHS7;A0A0B4KGE1;Q24151;A0A0B4KHS6;A0A0B4KH10	-0.332779	-0.312809
240	A0A0B4KH12;A8WHL4;A0A0B4KHT0;Q9VDK5;A0A0B4KGE5;A0A0B4KHG7	A0A0B4KH12;A8WHL4;A0A0B4KHT0;Q9VDK5;A0A0B4KGE5;A0A0B4KHG7	0.111055	0.153505
241	A0A0B4KGF7;Q9VMY5;Q0KIE6	A0A0B4KGF7;Q9VMY5;Q0KIE6	-0.43902	-0.235854
242	A0A0B4KGG9	A0A0B4KGG9	-0.0287189	-0.0745681
243	A0A0B4KGH0;A0A0B4KHR4	A0A0B4KGH0;A0A0B4KHR4	0.0681661	0.0388707
244	A0A0B4LIF3;A0A0B4KGH5;Q86NP2	A0A0B4LIF3;A0A0B4KGH5;Q86NP2	0.0796127	0.0302489
247	A0A0B4KGK3;Q95RA8	A0A0B4KGK3;Q95RA8	0.55494	0.423777
248	A4V370;A0A0B4KGL5;P49283;A0A0B4K7L4	A4V370;A0A0B4KGL5;P49283;A0A0B4K7L4	0.229757	0.192047
249	A8JR03;A8JR02;A0A0B4KGM4;A0A0B4KH30;A8JR00;A0A0C4DHA9	A8JR03;A8JR02;A0A0B4KGM4;A0A0B4KH30;A8JR00;A0A0C4DHA9	-0.297072	-0.346147
252	A0A0B4KGP8;Q24208	A0A0B4KGP8;Q24208	-0.237358	-0.192036
253	A0A0B4KGQ0;Q9VCI7	A0A0B4KGQ0;Q9VCI7	0.143835	-0.00689847
255	Q9VEV1;A0A0B4KGS4	Q9VEV1;A0A0B4KGS4	-0.249131	-0.288693
256	Q9VEL0;A0A0B4KGU2;C7LAF3	Q9VEL0;A0A0B4KGU2;C7LAF3	0.491161	0.365826
257	A0A0B4KGU4;Q9VHP0	A0A0B4KGU4;Q9VHP0	0.0766328	0.0245317
258	A0A0B4KGV7;Q9VCG3	A0A0B4KGV7;Q9VCG3	0.0627966	0.00372589
260	A0A0B4KH76;A0A0B4KGW7;Q9VGC3	A0A0B4KH76;A0A0B4KGW7;Q9VGC3	0.12312	0.105251
261	H1UUJ8;A0A0B4KGX1;Q01989;A0A0B4LHV4	H1UUJ8;A0A0B4KGX1;Q01989;A0A0B4LHV4	0.097897	0.0840596
262	A0A0B4KGX7;Q95TN8	A0A0B4KGX7;Q95TN8	0.288397	0.35793
263	Q9VC89;A0A0B4KGY2;Q8IMW9	Q9VC89;A0A0B4KGY2;Q8IMW9	0.222276	0.176957
265	Q9VHB7;A0A0B4KGZ0;Q9V424	Q9VHB7;A0A0B4KGZ0;Q9V424	-0.253247	-0.188188
266	Q9V3X2;A0A0B4KH03	Q9V3X2;A0A0B4KH03	-0.875554	-0.995668
267	A0A0B4KH16;Q9VDJ9;A0A0B4KHT3	A0A0B4KH16;Q9VDJ9;A0A0B4KHT3	0.687104	1.03869
268	A0A0B4KH25;P08985	A0A0B4KH25;P08985	-0.344436	-0.39367
269	A0A0B4KH26;Q9VH20;A0A0B4KG32	A0A0B4KH26;Q9VH20;A0A0B4KG32	0.386958	0.475986
271	A0A0B4KH34;P22464	A0A0B4KH34;P22464	-0.424778	-0.433249
272	A0A0B4KH36	A0A0B4KH36	-0.030963	-0.0186312
273	A0A0B4KH39;Q24210;E1JIS7;A8JR72;A8JR71	A0A0B4KH39;Q24210;E1JIS7	0.449781	0.357507
274	A0A0B4KH54;Q9VFL5	A0A0B4KH54;Q9VFL5	-0.499314	-0.434295
275	Q8IMR0;Q8IMR1;B7Z0Q8;A0A0B4KH68	Q8IMR0;Q8IMR1;B7Z0Q8;A0A0B4KH68	0.61715	0.611967
277	A0A0B4KH85;Q9VEW2	A0A0B4KH85;Q9VEW2	-0.280886	0.0256053
278	A0A0B4KH87;Q9VAT1	A0A0B4KH87;Q9VAT1	0.257927	0.169153
280	B7Z0L1;B7Z0L0;Q9VES3;Q8INA9;A0A0B4KH94;A8JR25;P10674	B7Z0L1;B7Z0L0;Q9VES3;Q8INA9;A0A0B4KH94;A8JR25;P10674	0.0965073	0.0687809
281	A0A0B4KHA0;Q9I7J2	A0A0B4KHA0;Q9I7J2	0.220813	0.214185
282	A0A0B4KHN4;A0A0B4KHA2;Q9VEK6	A0A0B4KHN4;A0A0B4KHA2;Q9VEK6	0.133587	0.25239
283	A0A0B4KHB2	A0A0B4KHB2	0.486004	0.26901
284	B7Z0L6;A0A0B4KHB9;Q8IN89	B7Z0L6;A0A0B4KHB9;Q8IN89	0.600599	0.542344
285	A0A0B4KHC7;Q9VE71	A0A0B4KHC7;Q9VE71	-0.241727	-0.121191
286	A0A0B4KHD3;Q7KSC4	A0A0B4KHD3;Q7KSC4	0.321215	0.236796
287	A0A0B4KHD9;A0A0B4KHS5;Q9VC90;A0A0B4KI02;Q8IGI0	A0A0B4KHD9;A0A0B4KHS5;Q9VC90;A0A0B4KI02;Q8IGI0	2.00234	1.85597
288	A0A0B4KHE1;Q9VAF2	A0A0B4KHE1;Q9VAF2	0.289995	0.262683
289	A0A0B4KHE9;Q9V3P6;A0A0B4KI10	A0A0B4KHE9;Q9V3P6;A0A0B4KI10	-0.022052	0.0442624
290	Q9VA83;A0A0B4KHF0	Q9VA83;A0A0B4KHF0	-0.161758	-0.194657
291	Q7KS07;E1JIV8;A0A0B4KHG2;Q9VC27	Q7KS07;E1JIV8;A0A0B4KHG2;Q9VC27	-0.0118639	-0.0131513
292	A0A0B4KHH2;Q95SP2	A0A0B4KHH2;Q95SP2	-0.271365	-0.32463
293	A0A0B4KHH6;Q9VAF4;A0A0B4LHU7	A0A0B4KHH6;Q9VAF4;A0A0B4LHU7	0.228648	0.203875
294	A0A0B4KHH7;Q9VC03;Q7KS06	A0A0B4KHH7;Q9VC03;Q7KS06	1.05911	1.11607
295	A0A0B4KHJ1;P25867	A0A0B4KHJ1;P25867	-0.0489972	-0.0651753
296	A0A0B4KHJ5;Q9VFC8	A0A0B4KHJ5;Q9VFC8	-0.0792675	-0.0858467
297	A0A0B4KHJ7;Q9Y0I1	A0A0B4KHJ7;Q9Y0I1	0.237592	0.255827
298	Q9VBQ6;A0A0B4KHK0	Q9VBQ6;A0A0B4KHK0	1.62631	1.52642
299	A0A0B4KHL7;P91928;A0A0B4KGN2	A0A0B4KHL7;P91928;A0A0B4KGN2	-0.123828	-0.0978939
303	A0A0B4KHP8;E1JIU3;A0A0B4KHY5;H0RNC3;Q9VCP1	A0A0B4KHP8;E1JIU3;A0A0B4KHY5;H0RNC3;Q9VCP1	0.0259808	0.0810232
304	A0A0B4KHQ0;Q05652	A0A0B4KHQ0;Q05652	0.434188	0.317687
306	A0A0B4KHR8;Q9VCA8;A0A0B4K725;A0A0B4LHK4;A0A0B4KHZ8	A0A0B4KHR8;Q9VCA8;A0A0B4K725;A0A0B4LHK4;A0A0B4KHZ8	0.168136	0.172158
308	A0A0B4KHS9;P48461;A8QI94	A0A0B4KHS9;P48461	0.196986	0.0102488
309	A0A0B4KHT9;Q9I7I0	A0A0B4KHT9;Q9I7I0	-0.0737721	-0.223222
310	A0A0B4KHU1;Q9VDG2	A0A0B4KHU1;Q9VDG2	-0.721312	-0.513534
311	A0A0B4KHU6;A0A0B4KI14;Q9VBW6	A0A0B4KHU6;A0A0B4KI14;Q9VBW6	0.175427	-0.0982522
312	A0A0B4KHV0;P30430;P26016;A0A0B4KI15;F0JAG0	A0A0B4KHV0;P30430;P26016;A0A0B4KI15	0.08932	0.15841
313	A0A0B4KHW0;B7Z0S0;Q8IMJ7;A4V3M5;Q9V407;E1JJ18	A0A0B4KHW0;B7Z0S0;Q8IMJ7;A4V3M5;Q9V407	2.4163	2.23429
314	A0A0B4KHW1;Q9VD28	A0A0B4KHW1;Q9VD28	0.373666	0.400183
315	A0A0B4KHW3	A0A0B4KHW3	-0.106532	-0.061562
317	A0A0B4KHX3;O76324	A0A0B4KHX3;O76324	0.324064	0.266074
319	A0A0B4KHY4;P08953	A0A0B4KHY4;P08953	-0.545987	-0.584999
321	A0A0B4KHY8;Q9XZ32	A0A0B4KHY8;Q9XZ32	-0.278607	-0.247089
322	A0A0B4KHZ0;A8JRE3;A0A0B4KI43;Q9VB55;A0A0B4K7W6	A0A0B4KHZ0;A8JRE3;A0A0B4KI43;Q9VB55	0.0184382	-0.0221296
324	Q8IMM6;A0A0B4KHZ9;Q9VAY4	Q8IMM6;A0A0B4KHZ9;Q9VAY4	-0.270801	0.0383613
325	Q9VC56;Q8IMW2;A0A0B4KI06;A0A0B4LIK5;A0A0B4KHF3;Q7KS15	Q9VC56;Q8IMW2;A0A0B4KI06;A0A0B4LIK5;A0A0B4KHF3;Q7KS15	0.156425	0.210774
326	A0A0B4KI07;Q9VAP9;A0A0B4KI51	A0A0B4KI07;Q9VAP9;A0A0B4KI51	0.409054	0.361769
327	A0A0B4KI19;Q9VBP3	A0A0B4KI19;Q9VBP3	0.491779	0.541762
328	A0A0B4KI24;Q27415	A0A0B4KI24;Q27415	-0.287975	-0.241743
331	Q59DT9;A0A0B4KI28;Q9VBJ2;A0A0B4KHX4;Q8IMS2	Q59DT9;A0A0B4KI28;Q9VBJ2;A0A0B4KHX4;Q8IMS2	-0.0209977	0.113484
332	A0A0B4KI32;Q9VA36;A0A0B4KI34;Q86PF3;A0A0B4KHJ8;A0A0B4KHG1;Q9Y154;Q9VA35	A0A0B4KI32;Q9VA36;A0A0B4KI34;Q86PF3;A0A0B4KHJ8;A0A0B4KHG1;Q9Y154;Q9VA35	0.227845	0.0414454
333	A0A0B4KI38;Q9V9X4	A0A0B4KI38;Q9V9X4	-0.131022	-0.137778
334	Q8IMK5;C6TP98;A0A0B4KI57;A0A0B4K7R2;Q9VAI0	Q8IMK5;C6TP98;A0A0B4KI57;A0A0B4K7R2;Q9VAI0	-0.467322	-0.295404
335	Q9V9Y9;A0A0B4KI68	Q9V9Y9;A0A0B4KI68	0.114251	0.154263
336	A0A0B4KI69;P32866	A0A0B4KI69;P32866	0.0554283	0.0393843
337	A0A0B4KI71	A0A0B4KI71	0.0307227	0.223021
338	A0A0B4LEK8;A1Z813	A0A0B4LEK8;A1Z813	-0.116121	-0.116385
339	A0A0B4LF00;A1Z833;A0A0B4LEL6;A0A0B4LF16;Q7K2V5;A0A0B4KF56;E2QCN5	A0A0B4LF00;A1Z833;A0A0B4LEL6;A0A0B4LF16;Q7K2V5;A0A0B4KF56;E2QCN5	-0.839305	-0.683742
341	A0A0B4LES3;Q9V9E3	A0A0B4LES3;Q9V9E3	0.0595941	0.128342
342	A8DY62;A0A0B4LES9	A8DY62;A0A0B4LES9	0.667696	0.417075
343	Q7K4C2;A0A0B4LET0	Q7K4C2;A0A0B4LET0	-1.00962	-1.0098
344	A0A0B4LET2;Q9V979	A0A0B4LET2;Q9V979	0.249525	0.201144
345	A0A0B4LEV2;Q26454	A0A0B4LEV2;Q26454	-0.087616	-0.139628
346	A0A0B4LEV3;Q7JWR9	A0A0B4LEV3;Q7JWR9	-0.05639	-0.0067876
347	A0A0B4LEV8;A1Z7A8	A0A0B4LEV8;A1Z7A8	-0.0176862	-0.0458627
349	A0A0B4LEX6;A1Z920;A1Z921	A0A0B4LEX6;A1Z920;A1Z921	-0.996856	-0.94191
350	A0A0B4LEY4;A1Z7K9	A0A0B4LEY4;A1Z7K9	-0.0465775	-0.0284427
351	A0A0B4LEY6;Q94518	A0A0B4LEY6;Q94518	-0.322565	-0.353629
352	A0A0B4LEY9;Q9V411	A0A0B4LEY9;Q9V411	0.0921408	0.0721019
354	A0A0B4LF26;Q7K550	A0A0B4LF26;Q7K550	0.224634	0.295107
355	A0A0B4LF45;P82712	A0A0B4LF45;P82712	-1.29814	-1.30226
356	Q8T085;A1Z8S4;A0A0B4LG64;A0A0B4LF50	Q8T085;A1Z8S4;A0A0B4LG64;A0A0B4LF50	0.401117	0.15251
357	A0A0B4LF54;Q9V770;P33270	A0A0B4LF54;Q9V770	0.396747	1.35313
358	A0A0B4LF57;P62152	A0A0B4LF57;P62152	-0.558042	-0.511939
359	A0A0B4LF59;Q7KN79	A0A0B4LF59;Q7KN79	0.278923	0.318277
360	A0A0B4LF89;A0A0B4LG91;Q8WSF3	A0A0B4LF89;A0A0B4LG91;Q8WSF3	-0.280522	-0.105255
361	A0A0B4LF92;A1Z9A2	A0A0B4LF92;A1Z9A2	-0.485013	-0.466025
362	A1Z942;A1Z943;Q0E9A1;E1JH47;Q7JQK6;A0A0B4LGA3;Q961I1;A0A0B4LF95;A1Z944;Q1RL13	A1Z942;A1Z943;Q0E9A1;E1JH47;Q7JQK6;A0A0B4LGA3;Q961I1;A0A0B4LF95;A1Z944;Q1RL13	2.54969	2.66334
365	A0A0B4LFA6	A0A0B4LFA6	-0.096547	-0.0237344
366	A0A0B4LFB3;Q7JVI3	A0A0B4LFB3;Q7JVI3	0.17764	0.154066
367	A8DYD3;A1Z9M3;B7YZE6;A0A0B4LFC7;A8DYD2;A8DYD1;A0A0B4LF29;A0A126GUP1	A8DYD3;A1Z9M3;B7YZE6;A0A0B4LFC7;A8DYD2;A8DYD1;A0A0B4LF29;A0A126GUP1	0.417216	0.284188
368	A0A0B4LFD2;P29845	A0A0B4LFD2;P29845	-0.0550774	-0.0196415
369	A0A0B4LFD7;Q7JQG5;A0A0B4LF60	A0A0B4LFD7;Q7JQG5	1.6348	1.5975
370	A0A0B4LFD9;Q8T3U2	A0A0B4LFD9;Q8T3U2	-0.3276	-0.425244
371	A0A0B4LFE2;A1Z9Z1;Q7K0W0;A0A0B4LFF7;D3DMX8	A0A0B4LFE2;A1Z9Z1;Q7K0W0	-0.0770241	-0.00580108
372	A0A0B4LFF6;Q7K3C2	A0A0B4LFF6;Q7K3C2	0.0649873	0.687817
373	A0A0B4LFF9;A0A0B4LF47;A0A0B4LFE6;A1Z9W4;E1JH68;C0P8M6	A0A0B4LFF9;A0A0B4LF47;A0A0B4LFE6;A1Z9W4	0.21495	0.250467
374	A0A0B4LFH0;Q9V813;A0A0B4KG54	A0A0B4LFH0;Q9V813;A0A0B4KG54	0.0656773	0.020143
375	A0A0B4LFH2;Q7JUP3	A0A0B4LFH2;Q7JUP3	-0.179159	-0.108459
376	A0A0B4LFJ1;Q23997	A0A0B4LFJ1;Q23997	0.208527	0.152149
377	A0A0B4LFJ4;Q9V7H4	A0A0B4LFJ4;Q9V7H4	-0.00961422	-0.0183303
379	A0A0B4LFL2;A1ZAX1	A0A0B4LFL2;A1ZAX1	-0.185749	-0.16025
380	A0A0B4LFL3;O96827	A0A0B4LFL3;O96827	-0.459642	-0.381138
382	A0A0B4LFP4;A8DYH2	A0A0B4LFP4;A8DYH2	-0.0355468	0.105788
383	A0A0B4LFP9;Q4V6M7	A0A0B4LFP9;Q4V6M7	0.164625	-0.20981
384	A0A0B4LFQ3;A1ZBH8;A0A0B4LGY8;A0A0B4LFV0;A1ZBH7	A0A0B4LFQ3;A1ZBH8;A0A0B4LGY8;A0A0B4LFV0;A1ZBH7	0.136029	0.104644
386	A0A0B4LFS3;Q8SX68	A0A0B4LFS3;Q8SX68	-0.416901	-0.45997
387	A0A0B4LFT2;Q27606;Q9V4T5	A0A0B4LFT2;Q27606	1.00604	1.31134
389	A0A0B4LFU5;Q8IGJ0	A0A0B4LFU5;Q8IGJ0	0.626095	0.806578
390	A0A0B4LFU9	A0A0B4LFU9	0.0492303	-0.237774
391	A0A0B4LGV3;A0A0B4LFV9;A1ZAV3	A0A0B4LGV3;A0A0B4LFV9;A1ZAV3	0.580689	0.636474
392	A0A0B4LFW6;A1Z7S0	A0A0B4LFW6;A1Z7S0	0.189518	0.238691
393	A0A0B4LFX0;Q8T4F7	A0A0B4LFX0;Q8T4F7	0.17821	0.117699
394	A0A0B4LFX2;A0A0B4K6U3;A1Z7T1;A0A0B4LF03;A0A0B4LEI8;A1Z7T0;A0A0B4K727;A0A0B4JD07;A1Z7T3;A8DY76;A0A0B4LEY5;A1Z7T2;E1JH15;A1Z7T4	A0A0B4LFX2;A0A0B4K6U3;A1Z7T1;A0A0B4LF03;A0A0B4LEI8;A1Z7T0;A0A0B4K727;A0A0B4JD07;A1Z7T3;A8DY76;A0A0B4LEY5;A1Z7T2;E1JH15	0.307807	0.29873
395	A0A0B4LFY0	A0A0B4LFY0	-0.591038	-0.7194
396	A0A0B4LFY2;Q7JW12	A0A0B4LFY2;Q7JW12	0.554032	0.609295
397	A0A0B4LFY9	A0A0B4LFY9	-0.219043	0.034429
399	A0A0B4LG04;Q9V968;A0A0B4LH12	A0A0B4LG04;Q9V968;A0A0B4LH12	-0.271444	-0.318862
400	A8DYJ3;A0A0B4LG26;Q11002;Q9VFV0	A8DYJ3;A0A0B4LG26;Q11002	-0.0741691	0.00108997
401	A0A0B4LG36;Q06943	A0A0B4LG36;Q06943	-0.652672	-0.572616
402	A0A0B4LG47;Q24141	A0A0B4LG47;Q24141	-0.0129953	-0.059224
403	A0A0B4LG52;Q9W237	A0A0B4LG52;Q9W237	-0.601028	-0.607488
404	A0A0B4LG79;B7YZM9;B7YZN0;E1JGQ9;P49415;A0A0B4K862	A0A0B4LG79;B7YZM9;B7YZN0;E1JGQ9;P49415	0.156933	0.190032
405	A0A0B4LG95;Q7K274;A0A0B4LGC6;Q8MLS7	A0A0B4LG95;Q7K274;A0A0B4LGC6;Q8MLS7	-0.296491	-0.452279
406	A0A0B4LGA1;Q9W1K0	A0A0B4LGA1;Q9W1K0	-0.242198	-0.40858
407	A0A0B4LGA2	A0A0B4LGA2	-0.773825	-0.513536
408	A0A0B4LGA7;P27091	A0A0B4LGA7;P27091	0.263682	0.393458
409	A0A0B4LGB0;Q24007;Q8MLT4	A0A0B4LGB0;Q24007;Q8MLT4	0.235959	0.223949
410	A0A0B4LGC0;Q9V6K1;A0A0B4LF88	A0A0B4LGC0;Q9V6K1;A0A0B4LF88	-0.12163	-0.0709046
412	A0A0B4LGC8;O77475	A0A0B4LGC8;O77475	0.293052	0.237542
414	A0A0B4LGF5;A1Z9N0;A0A0B4LFB8;Q95U20;A0A0B4LF33	A0A0B4LGF5;A1Z9N0;A0A0B4LFB8;Q95U20;A0A0B4LF33	-0.0950655	-0.129199
415	A0A0B4LGF9;Q24573;A0A0B4LGB3	A0A0B4LGF9;Q24573;A0A0B4LGB3	-0.0500356	-0.152031
416	A0A0B4LGG4;Q9W1K5	A0A0B4LGG4;Q9W1K5	0.0538143	0.237608
417	A0A0B4LGG6;Q9W1H0	A0A0B4LGG6;Q9W1H0	-0.24498	-0.226639
418	A0A0B4LGH5;Q9V769	A0A0B4LGH5;Q9V769	-0.124291	-0.253795
419	Q9W1D9;A0A0B4LGH8	Q9W1D9;A0A0B4LGH8	0.961914	1.00136
420	A0A0B4LGI1;P20354	A0A0B4LGI1;P20354	0.34649	0.268698
422	A0A0B4LHH1;Q960R0;Q9W1B5;A0A0B4LGJ9	A0A0B4LHH1;Q960R0;Q9W1B5;A0A0B4LGJ9	-0.0388717	0.0545737
424	A0A0B4LGL0;A1ZA47;A0A126GUN6;A0A0B4KEW3;C1C3E7;G3JX29;G3JX30;G3JX27;G3JX28;A0A0B4KFR8;A0A0B4KER6;G3JX25;G3JX31;G3JX32;G3JX33	A0A0B4LGL0;A1ZA47;A0A126GUN6;A0A0B4KEW3;C1C3E7;G3JX29;G3JX30;G3JX27;G3JX28;A0A0B4KFR8;A0A0B4KER6;G3JX25;G3JX31;G3JX32	0.697701	0.998071
425	Q8MLP3;A0A0B4LGL2;Q9W188;D6W4U0	Q8MLP3;A0A0B4LGL2;Q9W188;D6W4U0	-0.344416	-0.0066917
426	A0A0B4LGL5;Q8MSU3	A0A0B4LGL5;Q8MSU3	0.327747	0.35048
427	A0A0B4LGL6;P10379	A0A0B4LGL6;P10379	0.0438145	0.133593
428	A0A0B4LGL8;Q24535;B7YZQ0	A0A0B4LGL8;Q24535;B7YZQ0	-0.26097	-0.332005
429	Q9VNC3;A0A0B4LGM5;A0A0B4KF92;A0A0B4LGS6	Q9VNC3;A0A0B4LGM5;A0A0B4KF92;A0A0B4LGS6	0.164257	0.441653
430	A0A0B4LGQ1;Q00637	A0A0B4LGQ1;Q00637	-0.207026	-0.1744
431	A0A0B4LGQ8;Q9VN19	A0A0B4LGQ8;Q9VN19	0.809596	0.771248
432	A0A0B4LGR6;P41046	A0A0B4LGR6;P41046	0.451604	0.386
433	A0A0B4LGS0;P81641;P08144	A0A0B4LGS0;P81641;P08144	1.82122	0.560969
434	A0A0B4LGS4;P54611	A0A0B4LGS4;P54611	-0.196918	-0.210427
435	A0A0B4LGS5;Q8MRA9	A0A0B4LGS5;Q8MRA9	0.999969	0.902643
436	A0A0B4LGT4;Q9VHV5	A0A0B4LGT4;Q9VHV5	-0.374807	-0.305772
437	A0A0B4LGT7;Q9VNH1	A0A0B4LGT7;Q9VNH1	0.0361339	0.00775102
438	A0A0B4LGV1	A0A0B4LGV1	0.676859	0.722306
439	A0A0B4LGW1;Q9V877	A0A0B4LGW1;Q9V877	-0.151332	-0.136876
440	A0A0B4LGW2;A1ZB14	A0A0B4LGW2;A1ZB14	0.664653	0.790001
441	A0A0B4LGX0;Q9VHP9	A0A0B4LGX0;Q9VHP9	0.184567	0.173208
443	A0A0B4LGZ3;P36872	A0A0B4LGZ3;P36872	0.148846	0.158398
444	A0A0B4LGZ4;Q8INQ7	A0A0B4LGZ4;Q8INQ7	1.62783	1.77143
445	A0A0B4LGZ5;P46222	A0A0B4LGZ5;P46222	-0.439797	-0.439387
446	A0A0B4LGZ6;P51592	A0A0B4LGZ6;P51592	0.194473	0.255279
447	A0A0B4LGZ8;Q8SY61	A0A0B4LGZ8;Q8SY61	1.72065	1.63863
448	A0A0B4LH34;Q8T913	A0A0B4LH34;Q8T913	0.513884	0.673671
449	Q8SX98;E1JGR9;Q0E8Y8;Q7KVL6;A0A0B4LH48;E1JGR7;A8DYL3	Q8SX98;E1JGR9;Q0E8Y8;Q7KVL6;A0A0B4LH48;E1JGR7;A8DYL3	0.725021	0.700695
451	A0A0B4LH53;P54351	A0A0B4LH53;P54351	-0.10545	-0.0723417
452	A0A0B4LH59;Q9VFG8	A0A0B4LH59;Q9VFG8	0.49884	0.534234
453	A0A0B4LH72;Q9VF08	A0A0B4LH72;Q9VF08	0.118772	0.0930538
454	A0A0B4LH99;Q9VED0	A0A0B4LH99;Q9VED0	0.238703	0.242726
455	A0A0B4LHA6;Q9VE61	A0A0B4LHA6;Q9VE61	0.0561423	-0.0769188
458	A0A0B4LHC1;B5RIZ2;Q9VDS5;A0A0B4LHN0;A0A0B4LHC3	A0A0B4LHC1;B5RIZ2;Q9VDS5;A0A0B4LHN0;A0A0B4LHC3	0.252864	0.310555
459	A0A0B4LHE7;Q9XZH6	A0A0B4LHE7;Q9XZH6	0.0563369	0.0604134
461	A0A0B4LHF7;Q9VD51	A0A0B4LHF7;Q9VD51	-0.101361	-0.245309
463	A0A0B4LHG2;Q0KI28	A0A0B4LHG2;Q0KI28	-0.495207	-0.454904
464	A0A0B4LHI3;Q9XZL8	A0A0B4LHI3;Q9XZL8	0.0391038	-0.107476
465	Q9VCV1;A0A0B4LHK8	Q9VCV1;A0A0B4LHK8	-0.779177	-0.811323
466	A0A0B4LHL7;Q24251	A0A0B4LHL7;Q24251	-0.136964	-0.109318
468	A0A0B4LHQ9	A0A0B4LHQ9	-0.157993	-0.380309
469	A0A0B4LIP5;A0A0B4LHS0;Q7K137;A0A0B4LHY5	A0A0B4LIP5;A0A0B4LHS0;Q7K137;A0A0B4LHY5	0.586474	0.696995
470	A0A0B4LHS9;Q94547	A0A0B4LHS9;Q94547	0.187955	0.0457852
471	A0A0B4LHT3;Q9VAS7	A0A0B4LHT3;Q9VAS7	-0.48473	-0.518934
472	A0A0B4LHT4;Q8I0J6;Q9VNJ0	A0A0B4LHT4;Q8I0J6;Q9VNJ0	1.39581	1.24997
473	A0A0B4LHV8;Q9VC57	A0A0B4LHV8;Q9VC57	0.171388	0.22953
474	A0A0B4LHX1;O76206	A0A0B4LHX1;O76206	0.148694	0.192171
475	A0A0B4LJ12;A0A0B4LHX6;P08879	A0A0B4LJ12;A0A0B4LHX6;P08879	-0.365353	-0.368605
476	A0A0B4LI25;P20480	A0A0B4LI25;P20480	-0.247392	-0.242061
477	A0A0B4LI86;P08266	A0A0B4LI86;P08266	-0.0377519	-0.108801
478	A0A0B4LIA3	A0A0B4LIA3	0.066311	0.112985
479	Q9VDS7;A0A0B4LID7	Q9VDS7;A0A0B4LID7	0.138577	0.120279
480	A0A0B4LIE8;Q9VDL7;Q8IN53	A0A0B4LIE8;Q9VDL7;Q8IN53	0.508814	0.0808325
481	A0A0B4LIG1	A0A0B4LIG1	-0.121942	-0.192138
482	A0A0B4LIJ0;P48601	A0A0B4LIJ0;P48601	-0.145862	-0.0880907
483	A0A0B7P9G0	A0A0B7P9G0	0.0691296	0.153604
484	A0A0C4DHA5;Q9VN84;Q8IPP2	A0A0C4DHA5;Q9VN84;Q8IPP2	-0.210238	-0.108773
485	Q3ZAP4;A0A0C4DHA6;A0A0B4KH43;C0PPK5;Q8MTZ6;A8JQX3	Q3ZAP4;A0A0C4DHA6;A0A0B4KH43;C0PPK5;Q8MTZ6;A8JQX3	-0.278109	-0.245042
487	Q0KHZ4;A0A0C4DHB8;Q8IMK1	Q0KHZ4;A0A0C4DHB8;Q8IMK1	-0.187906	-0.22161
488	A0A0C4DHC2;E2QC63;A8DY48;Q7KHG2	A0A0C4DHC2;E2QC63;A8DY48;Q7KHG2	0.6148	0.637095
489	A0A0C4DHD1;Q7KVH9	A0A0C4DHD1;Q7KVH9	0.745655	0.872787
490	A0A0C4DHD4;Q45VV3	A0A0C4DHD4;Q45VV3	1.34245	1.07937
491	A0A0C4DHE6;Q9VFS5	A0A0C4DHE6;Q9VFS5	0.279093	0.27186
492	A0A0C4DHE7	A0A0C4DHE7	-0.366302	-0.44709
493	A0A0C4DHE8;Q9VH69	A0A0C4DHE8;Q9VH69	-0.165177	-0.218805
494	Q8WR08;A0A0C4DHF6;A1ZA89;Q8STB9	Q8WR08;A0A0C4DHF6;A1ZA89;Q8STB9	-0.126493	-0.0299345
495	A0A0C4DHG1;Q9VNE3;A0A0B4KF37	A0A0C4DHG1;Q9VNE3	-0.414945	-0.4569
496	A0A0C4DHG2;Q07171;A0A0C4DHG6	A0A0C4DHG2;Q07171;A0A0C4DHG6	-0.34194	-0.365542
497	A0A0C4DHG5;P26686	A0A0C4DHG5;P26686	-0.0658615	-0.0954986
498	A0A0C4DHH3;Q7JUY8	A0A0C4DHH3;Q7JUY8	-3.72796	-3.49875
499	A0A0C4DHM7;A0A0C4DHN6;A0A0C4DHN1;A0A0C4DHN2	A0A0C4DHM7;A0A0C4DHN6;A0A0C4DHN1;A0A0C4DHN2	0.568937	0.600562
501	Q9V3D8;A0A0C4FEI8	Q9V3D8;A0A0C4FEI8	0.142091	0.201167
502	Q95SZ9;M9PIK1;P91632;A0A0S0WH03;M9NGB9	Q95SZ9;M9PIK1;P91632;A0A0S0WH03;M9NGB9	-0.139912	-0.140695
503	X2JB24;A0A0S0WH10;Q9VU58	X2JB24;A0A0S0WH10;Q9VU58	0.578372	0.74917
505	A0A0S0WNN6;Q9TVM2	A0A0S0WNN6;Q9TVM2	-0.0203466	0.0987471
506	A0A0S0WNT6;Q9VNS0	A0A0S0WNT6;Q9VNS0	-0.2958	-0.044772
508	A0A0S0X7W8;A0A0S0X0Z7;M9PGE0;M9NEN6;Q9W5A5	A0A0S0X7W8;A0A0S0X0Z7;M9PGE0;M9NEN6;Q9W5A5	1.91423	1.99488
509	A0A0S0X8K7;Q9W4V8;Q9V9P3;Q9W0S3	A0A0S0X8K7;Q9W4V8	-0.166967	-0.17418
510	X2JES1;Q9VIS3;A0A0U1RVK6	X2JES1;Q9VIS3;A0A0U1RVK6	0.409762	0.43207
511	A0A126BEE6;Q9I7K6	A0A126BEE6;Q9I7K6	-0.00742541	-0.00657012
512	A0A126GUM8;E1JH02;A0A0B4K6T1;A0A0B4K7U5;A0A0B4KFC5;Q86S05;D0Z768	A0A126GUM8;E1JH02;A0A0B4K6T1;A0A0B4K7U5;A0A0B4KFC5;Q86S05;D0Z768	0.202648	0.110204
513	A0A126GUP4;Q9VN27	A0A126GUP4;Q9VN27	-0.0915431	-0.100745
514	A0A126GUP6	A0A126GUP6	-0.582562	-0.755062
515	A0A126GUQ3;Q9VNA8	A0A126GUQ3;Q9VNA8	0.0831625	-0.153539
516	A0A126GUQ4;Q0KIA8;Q9VI16	A0A126GUQ4;Q0KIA8;Q9VI16	0.0996924	0.157204
517	A0A126GUQ5;Q9Y0Y6	A0A126GUQ5;Q9Y0Y6	0.050511	0.0301743
518	A0A126GUS4;Q86BA1;A0A0B4K703;A0A0B4K6D5;A0A126GUS6;A0A0B4K6N6	A0A126GUS4;Q86BA1;A0A0B4K703;A0A0B4K6D5;A0A126GUS6;A0A0B4K6N6	0.192011	0.218184
519	A0A126GUS7;A0A0B4KFN9	A0A126GUS7;A0A0B4KFN9	-0.0880807	-0.0887941
520	A0A126GUT1;Q9VGS2	A0A126GUT1;Q9VGS2	-0.337192	-0.287551
521	A0A126GUU0;Q9V3G6	A0A126GUU0;Q9V3G6	-0.33834	-0.326212
522	A0A126GUU7;Q9VEX9	A0A126GUU7;Q9VEX9	0.153099	0.0222709
523	Q9VEZ6;A0A126GUV0	Q9VEZ6;A0A126GUV0	0.745799	0.467025
524	A0A126GUW2;Q9VEJ2	A0A126GUW2;Q9VEJ2	0.136804	0.0543082
525	A0A126GUX4	A0A126GUX4	0.219429	0.225729
527	A0A126GV10;A0A126GV13	A0A126GV10;A0A126GV13	-0.274488	-0.157801
528	A0A126GV23;P07666	A0A126GV23;P07666	0.0343643	-0.00738234
529	A0A126GV25;P07665	A0A126GV25;P07665	0.0476277	0.182658
530	A0A140SRF8	A0A140SRF8	-0.097323	-0.0944819
531	A0A1L4AAD6	A0A1L4AAD6	0.0762501	0.316853
532	A0AQH0	A0AQH0	0.139236	0.12686
534	A1A6X2	A1A6X2	0.4159	0.515512
535	A1A708	A1A708	0.152611	0.0463043
536	A1YK02	A1YK02	0.159168	0.0979642
538	A1Z6F6;Q7JQF6;A1Z6F4;B7YZT1;A0A0B4KF30	A1Z6F6;Q7JQF6;A1Z6F4;B7YZT1;A0A0B4KF30	1.53077	1.62553
539	A1Z6G4	A1Z6G4	-0.0687675	0.0503807
540	A1Z6G6	A1Z6G6	0.380102	0.509577
541	A1Z6H0	A1Z6H0	0.715065	0.614109
542	A1Z6H6	A1Z6H6	0.26389	0.184133
543	A1Z6H7	A1Z6H7	-0.10053	-0.0490464
544	A1Z6I7	A1Z6I7	0.195687	0.156948
546	A1Z6J2	A1Z6J2	1.25623	1.19911
547	A1Z6J5	A1Z6J5	-0.057476	0.0064663
548	A1Z6L9	A1Z6L9	-0.207437	-0.233422
549	A1Z6M0	A1Z6M0	0.275766	0.181785
550	A1Z6M6	A1Z6M6	-0.162135	-0.189058
551	A1Z6Q0;A4UZ58	A1Z6Q0;A4UZ58	-0.381791	-0.401227
552	A1Z6S6	A1Z6S6	0.297431	0.350367
554	A1Z6V5	A1Z6V5	-0.0605916	-0.162332
555	A1Z6X6	A1Z6X6	-0.281678	-0.226783
556	A1Z6Z7	A1Z6Z7	0.690292	0.548166
557	A1Z6Z9;A1Z6Z8;A1Z700	A1Z6Z9;A1Z6Z8;A1Z700	0.158773	0.274448
558	A1Z705	A1Z705	0.350226	0.362606
559	A1Z713	A1Z713	0.427042	0.458876
560	A1Z729;Q7JYX2	A1Z729	1.02886	1.33352
561	E1JGZ7;E1JGZ8;A1Z734;A0A0B4KEE7;Q8IGL5;Q6NND6	E1JGZ7;E1JGZ8;A1Z734;A0A0B4KEE7	0.175661	0.182989
562	A1Z743;A1Z745;Q8SXN9	A1Z743;A1Z745;Q8SXN9	0.206237	0.0714007
563	A1Z757;Q7JY97	A1Z757;Q7JY97	1.9018	2.09079
564	Q8MR50;A1Z759	Q8MR50;A1Z759	0.0167124	0.110971
565	Q8MSH0;A1Z765	Q8MSH0;A1Z765	-0.144727	-0.096903
566	A1Z768;Q7JY33	A1Z768;Q7JY33	0.402724	0.408701
567	A1Z782;A1Z783;Q8MQL4	A1Z782;A1Z783;Q8MQL4	0.707682	0.70086
568	A1Z784;Q7JV23;A8DY67	A1Z784;Q7JV23;A8DY67	0.244857	0.314961
569	A1Z7A5	A1Z7A5	-0.496524	-0.566664
570	A1Z7A6;E1JH06;A0A0B4LEF8	A1Z7A6;E1JH06;A0A0B4LEF8	-0.0220778	0.117067
571	A1Z7B8	A1Z7B8	0.124473	0.0286265
572	A1Z7C1;A0A0B4KEM3	A1Z7C1;A0A0B4KEM3	-0.674097	-0.414951
573	A1Z7G9	A1Z7G9	-0.479877	-0.537009
574	A1Z7H7	A1Z7H7	-0.726571	-0.967153
575	A1Z7J6	A1Z7J6	0.639498	0.874091
576	A1Z7J7;A0A0B4LEY1;A0A0B4LEZ1	A1Z7J7;A0A0B4LEY1;A0A0B4LEZ1	0.00164782	0.0794365
577	A1Z7K2	A1Z7K2	0.220207	0.0972479
578	A1Z7K6	A1Z7K6	-0.146906	-0.296838
579	A1Z7K8	A1Z7K8	0.101058	0.139837
580	A1Z7L1	A1Z7L1	0.355134	0.286944
582	A1Z7P1	A1Z7P1	0.0117499	0.059254
583	A1Z7P3;Q6NL95	A1Z7P3;Q6NL95	0.490012	0.447599
585	E2QCN3;A1Z7Q7	E2QCN3;A1Z7Q7	0.438585	0.144068
586	A1Z7Q8;Q95SG9	A1Z7Q8;Q95SG9	-0.0446121	-0.0482441
589	Q95T49;A1Z7S4;C9QPE2	Q95T49;A1Z7S4;C9QPE2	0.254586	-0.244761
591	Q7K3S2;A1Z7V8;A1Z7V9	Q7K3S2;A1Z7V8;A1Z7V9	0.775291	0.584773
592	A1Z7W1	A1Z7W1	0.221065	0.211614
594	A1Z7X7	A1Z7X7	-0.799277	-0.4671
595	A1Z7Z8	A1Z7Z8	-1.02422	-1.14348
596	A1Z802	A1Z802	0.0606372	0.06207
597	A1Z803	A1Z803	0.0914357	0.0766082
598	A1Z814;A0A0B4KEI3;E1JH23	A1Z814;A0A0B4KEI3	-0.164454	-0.152853
599	A1Z818;E1JH25;E1JH24	A1Z818;E1JH25;E1JH24	-0.913754	-0.52285
601	A1Z830;A1Z831	A1Z830;A1Z831	-0.409186	-0.452633
602	A1Z840	A1Z840	-0.065319	-0.201279
603	A1Z843	A1Z843	-0.140875	-0.0895444
605	A1Z893	A1Z893	0.827388	0.839658
606	A1Z898	A1Z898	-0.144492	-0.0451782
607	Q8T008;A1Z8A7;A8DY95	Q8T008;A1Z8A7;A8DY95	-1.02132	-0.919301
608	Q8T972;A1Z8B5	Q8T972;A1Z8B5	0.364318	0.658526
609	A1Z8C0	A1Z8C0	-0.975946	-0.920953
610	A1Z8C4	A1Z8C4	0.670495	0.70234
611	A1Z8D0	A1Z8D0	0.313045	0.446756
612	Q9V5R2;A1Z8D1	Q9V5R2;A1Z8D1	0.81228	0.908543
613	A1Z8D4	A1Z8D4	0.467162	0.297496
614	A1Z8I0	A1Z8I0	1.14722	0.754755
616	J7K3P9;A1Z8L8;Q95TS2;D3DMU9	J7K3P9;A1Z8L8;Q95TS2;D3DMU9	0.74216	0.668355
617	A1Z8M2;A8DYA3;A0A0B4KFE3;A0A0B4KEM1;Q95T46	A1Z8M2;A8DYA3;A0A0B4KFE3;A0A0B4KEM1	0.0288903	-0.0822406
618	A1Z8R2	A1Z8R2	0.235342	0.212066
619	A1Z8R6;Q7JZU2	A1Z8R6;Q7JZU2	-0.134479	-0.0571403
620	A1Z8R8	A1Z8R8	-0.485227	-0.272729
621	A1Z8S6	A1Z8S6	0.143938	0.179653
622	A1Z8T3	A1Z8T3	0.181872	0.195198
623	A1Z8U0	A1Z8U0	-0.0278608	-0.0299403
624	A1Z8U7	A1Z8U7	0.0993077	0.0398318
625	A1Z8V0;Q9V3H7	A1Z8V0	-0.977152	-1.27552
626	A1Z8W8;A1Z8W9;A0A0B4K7N0	A1Z8W8;A1Z8W9;A0A0B4K7N0	0.563551	0.615451
628	A1Z8X3	A1Z8X3	-0.363341	-0.640142
629	A1Z909	A1Z909	-0.0483484	0.0121738
630	A1Z933	A1Z933	0.505239	0.543455
631	A1Z934	A1Z934	-0.184953	-0.116567
632	A1Z936;A1Z935	A1Z936;A1Z935	0.0394469	0.103756
633	A1Z968;Q0E996	A1Z968;Q0E996	0.41756	0.423004
635	A1Z987;B3DN53	A1Z987;B3DN53	0.144295	0.203119
636	A1Z992	A1Z992	0.0831506	-0.0667836
637	A1Z9A8	A1Z9A8	0.046017	0.103453
639	A1Z9D7	A1Z9D7	-0.154395	-0.133517
640	E1JH59;A1Z9E2	E1JH59;A1Z9E2	1.1744	0.930496
641	A1Z9E3	A1Z9E3	-0.120569	-0.0990569
643	A8DYC9;Q86NK6;Q7JRK7;A1Z9F4;Q8IGA7	A8DYC9;Q86NK6;Q7JRK7;A1Z9F4;Q8IGA7	0.00966788	0.0201429
644	A1Z9G2	A1Z9G2	0.227701	0.12442
645	A1Z9I0	A1Z9I0	0.83515	0.907573
646	A1Z9I5	A1Z9I5	0.316242	0.243317
647	A1Z9I6	A1Z9I6	0.476336	0.581941
648	A1Z9J3	A1Z9J3	0.68983	0.642515
649	A1Z9J6	A1Z9J6	0.254224	0.226798
650	A1Z9K0	A1Z9K0	0.187742	0.150147
651	A1Z9K4;Q7KQC4;A0A0B4JD18;Q95RE0;A0A0B4KEQ5	A1Z9K4;Q7KQC4;A0A0B4JD18;Q95RE0;A0A0B4KEQ5	-0.607654	-0.29925
652	A1Z9K8;A0A0B4LFA9;A0A0B4K7Z0;A0A0B4LF25	A1Z9K8;A0A0B4LFA9;A0A0B4K7Z0;A0A0B4LF25	-0.168451	-0.00695418
653	A1Z9L3	A1Z9L3	-0.0253478	-0.013639
654	A1Z9L5	A1Z9L5	-0.0736616	-0.0127113
655	A1Z9M2;A0A0B4JD51;F2FB55	A1Z9M2;A0A0B4JD51;F2FB55	-0.408134	-0.0897427
657	A1Z9P1	A1Z9P1	0.0993004	0.140587
658	A1Z9S1	A1Z9S1	1.28416	1.33805
660	A1Z9S6	A1Z9S6	0.0931103	0.120854
662	A1Z9W2	A1Z9W2	0.207422	0.147228
663	A1Z9X0;A0A0B4KFQ6;A0A0B4KEQ8;A0A0B4KEV2;A0A0B4JD78;A0A0B4KG15;A0A0B4JD26	A1Z9X0;A0A0B4KFQ6;A0A0B4KEQ8;A0A0B4KEV2;A0A0B4JD78;A0A0B4KG15;A0A0B4JD26	-0.36466	-0.43187
664	A1ZA03	A1ZA03	-0.35541	-0.291117
665	A1ZA22	A1ZA22	0.06491	0.0756295
666	A1ZA27;A0A0B4LFG2	A1ZA27;A0A0B4LFG2	0.671812	0.461748
667	A1ZA28	A1ZA28	-0.182556	-0.41372
668	A1ZA77	A1ZA77	2.0692	2.03415
669	A1ZA83	A1ZA83	0.181773	0.241975
670	A1ZA92	A1ZA92	-0.114696	-0.0247818
671	A1ZAA9	A1ZAA9	0.295623	0.367166
672	A1ZAB5;A0A0B4KEX0	A1ZAB5;A0A0B4KEX0	0.178278	0.10324
673	A1ZAC4	A1ZAC4	1.11495	1.18849
674	A1ZAC7	A1ZAC7	-0.446312	-0.506522
675	A1ZAD7	A1ZAD7	1.72641	1.33955
676	A1ZAE2	A1ZAE2	0.199906	0.217795
677	A1ZAG1	A1ZAG1	-2.71642	-2.4816
678	A1ZAK1	A1ZAK1	1.19654	1.10679
679	A1ZAK4;A1ZAK3;Q8T0D3;Q8IFW6	A1ZAK4;A1ZAK3;Q8T0D3;Q8IFW6	0.159387	0.162921
680	A1ZAK7;A1ZAK8;A1ZAK9	A1ZAK7;A1ZAK8;A1ZAK9	0.114994	0.0473396
681	A1ZAM0	A1ZAM0	1.06828	1.1399
682	A1ZAN2;A4UZL2;B7YZI1;A4UZL3	A1ZAN2;A4UZL2;B7YZI1;A4UZL3	-0.670982	-0.414317
685	Q9NDR1;A1ZAS8	Q9NDR1;A1ZAS8	0.185	0.25543
686	A1ZAT5	A1ZAT5	-0.19697	-0.199837
687	Q7K5N8;A1ZAU4	Q7K5N8;A1ZAU4	0.302869	0.24921
688	A1ZAW0;A0A0B4LFK8	A1ZAW0;A0A0B4LFK8	0.0803847	0.118121
689	A1ZAW3	A1ZAW3	0.771814	0.602537
690	A1ZAW5	A1ZAW5	0.574864	0.555815
691	A1ZAW6	A1ZAW6	0.127239	0.149513
692	A1ZAW9	A1ZAW9	0.560506	0.731378
695	A1ZAY5	A1ZAY5	-0.55377	-0.566467
696	A1ZAY8	A1ZAY8	0.481177	0.74007
697	A1ZB29	A1ZB29	0.381473	0.212088
698	A1ZB42	A1ZB42	-0.34726	-0.30176
699	A1ZB61	A1ZB61	1.49558	0.488845
700	A1ZB68	A1ZB68	-0.66855	0.232548
701	A1ZB71	A1ZB71	-0.0898023	-0.111248
702	A1ZB72	A1ZB72	-0.314443	-0.310856
703	A1ZB73	A1ZB73	2.34931	2.35561
704	A1ZB84;REV__A1ZB84	A1ZB84	0.60095	0.677918
705	A1ZB86	A1ZB86	0.993585	1.02299
706	A1ZBA5	A1ZBA5	-0.410472	-0.440381
707	A1ZBB1	A1ZBB1	-0.985134	-0.947853
708	A8E6M1;A1ZBB4;E1JGL8	A8E6M1;A1ZBB4;E1JGL8	0.227469	0.258501
709	A1ZBE8	A1ZBE8	0.482914	0.50222
710	A1ZBE9	A1ZBE9	0.060676	0.0727266
711	A1ZBF1	A1ZBF1	-0.0780069	-0.0554266
713	A1ZBH2;A1ZBH3	A1ZBH2;A1ZBH3	-0.359392	-0.329672
714	A1ZBJ2	A1ZBJ2	-0.0626227	-0.0610243
715	A1ZBK6	A1ZBK6	0.231539	0.215796
716	A1ZBK7	A1ZBK7	0.191002	0.236456
717	A1ZBL2	A1ZBL2	0.628565	0.685742
718	A1ZBL9;Q9V8V8;Q6NPA6	A1ZBL9;Q9V8V8;Q6NPA6	1.72402	1.46692
719	A1ZBM2	A1ZBM2	0.0756198	0.0228946
720	A1ZBR2	A1ZBR2	0.597058	0.700488
722	A1ZBT5	A1ZBT5	-0.223387	-0.235208
723	A1ZBU5	A1ZBU5	2.24552	1.27809
724	A1ZBU8	A1ZBU8	0.780249	0.616871
725	A1ZBV0	A1ZBV0	-0.112526	-0.371509
726	A1ZBV5	A1ZBV5	0.30609	0.183873
727	A1ZBW1;A1ZBW0;A1ZBW3	A1ZBW1;A1ZBW0;A1ZBW3	-0.0380129	-0.0534007
728	A1ZBW6;A0A0B4LG45	A1ZBW6;A0A0B4LG45	1.34934	0.412672
729	A1ZBW7	A1ZBW7	0.460097	0.71939
730	A1ZBX4	A1ZBX4	-0.225621	-0.221989
733	Q9W061;A2VEF9;Q95RC8	Q9W061;A2VEF9;Q95RC8	-0.318288	-0.259626
734	A2VEG3;M9PDX3;M9PDK6;Q9VID5;Q8SZ43;M9PDD2	A2VEG3;M9PDX3;M9PDK6;Q9VID5;Q8SZ43;M9PDD2	0.594723	0.625529
735	A2VEI2	A2VEI2	-0.289694	-0.126466
736	A2VEK1	A2VEK1	0.389876	0.598918
737	A2VEY9;Q9VTV6	A2VEY9;Q9VTV6	-0.806412	-0.990542
738	A4UZ51;E1JGY2;P34021	A4UZ51;E1JGY2;P34021	-0.630026	-0.637317
739	A4UZL5;P41043	A4UZL5;P41043	-0.0870621	0.0278499
740	A4UZR3;Q9W2M2	A4UZR3;Q9W2M2	-0.208783	-0.372445
742	A4UZX7;Q27367	A4UZX7;Q27367	-0.204449	-0.23912
743	A4UZY2;P42519	A4UZY2;P42519	-0.395596	-0.649811
744	A4UZZ4;Q9XTL9	A4UZZ4;Q9XTL9	-0.0477451	-0.032583
745	A4V013;Q9NLA6	A4V013;Q9NLA6	1.55651	1.59719
746	A4V0N4;Q27331	A4V0N4;Q27331	-0.0246979	-0.0422999
747	A4V0R4;M9NDQ2;P54733	A4V0R4;M9NDQ2;P54733	0.441005	0.373902
748	A4V0S1;Q24509	A4V0S1;Q24509	0.384238	0.361511
749	A4V0U4	A4V0U4	-0.25013	-0.148438
750	A4V0X0;O61267;D3DMK7	A4V0X0;O61267;D3DMK7	0.117334	0.122398
752	A4V164;H5V8B9;Q9W0V1;A4V166	A4V164;H5V8B9;Q9W0V1;A4V166	0.202121	0.0374751
753	A4V1B2;Q9NB04	A4V1B2;Q9NB04	0.399053	0.412446
754	A4V1Q1;A4V1Q0;M9PF25;Q24207;Q6NN06	A4V1Q1;A4V1Q0;M9PF25;Q24207;Q6NN06	0.0530327	0.16721
755	A4V1Y7;Q2PDY2;A4V1Y6;Q2PDY1;M9PFM7;Q08605	A4V1Y7;Q2PDY2;A4V1Y6;Q2PDY1;M9PFM7;Q08605	0.511902	-0.0183184
756	Q7JQ32;A4V243	Q7JQ32;A4V243	-0.573397	-0.693955
758	A4V287;M9PG42;P39413	A4V287;M9PG42;P39413	-0.453035	-0.59769
759	A4V2A4	A4V2A4	-0.545076	-0.200523
760	A4V2B8;P08181	A4V2B8;P08181	0.142889	0.195333
761	A4V2I0;Q7KSX2;P15364	A4V2I0;Q7KSX2;P15364	-0.185263	-0.303778
762	A4V2K7;P22058	A4V2K7;P22058	-0.0409836	0.0225203
763	A4V2S3	A4V2S3	0.0175347	0.202387
764	A4V303;P48605	A4V303;P48605	-0.300581	-0.260622
765	A4V346;P10041	A4V346;P10041	0.119509	0.0573927
767	A4V383;P91929	A4V383;P91929	-0.0667847	-0.0399377
768	A4V391;P12613	A4V391;P12613	-0.316928	-0.344616
769	A4V392;Q9VCY8	A4V392;Q9VCY8	0.39568	0.584628
771	A4V3G8;Q7KRY6	A4V3G8;Q7KRY6	0.232438	0.309042
772	A4V3G9;A4V3H1;Q02926;Q59DT6	A4V3G9;A4V3H1;Q02926;Q59DT6	0.0567766	0.0886024
773	A4V3J6;A4V3J5;P07909	A4V3J6;A4V3J5;P07909	-0.09457	-0.113256
774	B7Z0R6;A4V3J9;Q0KI03;Q8IML9;A0A0B4K7Z3;A8JRF7;Q86B72;A0A0C4DHG9;P49762	B7Z0R6;A4V3J9;Q0KI03;Q8IML9;A0A0B4K7Z3;A8JRF7;Q86B72;A0A0C4DHG9;P49762	0.11564	-0.0224016
775	A4V3L3;Q7KRW1	A4V3L3;Q7KRW1	1.27263	1.26738
776	A4V3L8;Q9VAF0	A4V3L8;Q9VAF0	1.43981	1.10978
778	A4V3W0;O01346	A4V3W0;O01346	-0.0506298	0.00805023
779	A4V3W2;A4V3W1;P18431;Q0KHW6;M9PGC4;M9PGV7;A8JUV9;Q7KVY5;C0PUX5	A4V3W2;A4V3W1;P18431;Q0KHW6;M9PGC4;M9PGV7;A8JUV9;Q7KVY5;C0PUX5	0.166901	0.0873911
780	A4V3W7;Q8IRV6;Q9W4W3;Q9VM89	A4V3W7;Q8IRV6;Q9W4W3	-0.113546	0.0527919
781	A4V3W8;Q9U1M2	A4V3W8;Q9U1M2	-0.353058	-0.0509077
782	A4V402;P49071	A4V402;P49071	-0.343324	-0.244805
783	A4V408;Q9W429	A4V408;Q9W429	1.05092	1.34341
784	A4V441;Q24524	A4V441;Q24524	0.138738	0.0142194
785	A4V448;Q9W3K5	A4V448;Q9W3K5	-0.0298509	-0.0601915
786	A4V449;Q94511	A4V449;Q94511	-0.352336	-0.343711
787	A4V488;Q07152	A4V488;Q07152	-0.0412511	-0.109669
788	A4V4A1;Q960Z0	A4V4A1;Q960Z0	-0.131767	-0.137534
789	A4V4A5;Q9VZ23	A4V4A5;Q9VZ23	-0.399237	-0.343706
790	A4V4C1;M9NGA3;M9NDU6;M9PHA6;P08182	A4V4C1;M9NGA3;M9NDU6;M9PHA6;P08182	0.284955	0.304706
791	A4V4F2;M9PJN2;M9PHT0;F2FB46;M9PHL7;O61492;C9QP31	A4V4F2;M9PJN2;M9PHT0;F2FB46;M9PHL7;O61492;C9QP31	-0.311896	-0.295046
792	A4V4I0;P26308	A4V4I0;P26308	-0.109858	-0.186328
793	A4V4I8;X2JE15;E1JJA4;M9PHQ0;P27619;A4V4J0;M9PJN9;E1JJA5	A4V4I8;X2JE15;E1JJA4;M9PHQ0;P27619;A4V4J0;M9PJN9;E1JJA5	0.0126499	-0.0694749
794	A4V4Q7;Q94981;Q9VT94	A4V4Q7;Q94981	-0.0271546	0.0938341
795	A4V4S5;Q9Y1I2;M9PF72	A4V4S5;Q9Y1I2;M9PF72	0.0968691	0.0938308
796	E8NH77;X2JLF7;A4V4T4;Q24246	E8NH77;X2JLF7;A4V4T4;Q24246	-0.144977	-0.13618
797	A4V4U5;M9NHG9;M9NFJ2;Q04499	A4V4U5;M9NHG9;M9NFJ2;Q04499	-0.243867	-0.287859
798	Q8MRC7;Q9W5S7;Q9U4F5;A4V4V2;Q9TW27;Q9TW12	Q8MRC7;Q9W5S7;Q9U4F5;A4V4V2;Q9TW27;Q9TW12	0.589395	0.592463
800	A5XCL5;Q9VSW2;E1JI91;Q9VSW1	A5XCL5;Q9VSW2;E1JI91;Q9VSW1	0.202241	0.11833
801	A8DQW8	A8DQW8	-0.181564	-0.150129
804	A8DY81;E2QCN4;A0A0B4LEZ3;A8DY82;REV__Q9VYI7	A8DY81;E2QCN4;A0A0B4LEZ3;A8DY82	0.288392	0.266968
805	A8DYB0	A8DYB0	0.29565	0.37487
806	A8DYC5;A8DYC4	A8DYC5;A8DYC4	0.69504	0.66885
808	A8DYI6;Q0E924;A8DYI7	A8DYI6;Q0E924;A8DYI7	0.247325	0.262029
809	A8DYJ2;A0A0B4K849;A0A0B4K7A5;Q02645	A8DYJ2;A0A0B4K849;A0A0B4K7A5;Q02645	0.435116	0.382756
811	A8DYT3;M9PE16;A8DYT2;Q9VQ67	A8DYT3;M9PE16;A8DYT2;Q9VQ67	-0.245578	-0.205995
812	A8DYT6	A8DYT6	-0.178183	-0.223974
813	A8DYU2;A8DYU1;A8DYU3;R9PY62;R9PY34;M9NE71	A8DYU2;A8DYU1;A8DYU3;R9PY62;R9PY34	0.366009	0.361473
814	A8DYU9;Q9XYR0	A8DYU9;Q9XYR0	-1.01597	-1.00568
815	A8DYV8;X2J753	A8DYV8;X2J753	1.00067	0.708839
816	A8DYW1;Q9VMC7	A8DYW1;Q9VMC7	0.123172	0.160621
818	D5SHT8;B7Z029;M9PB53;Q9VM99;A8DYW5;Q8IPJ4	D5SHT8;B7Z029;M9PB53;Q9VM99;A8DYW5;Q8IPJ4	0.12144	-0.0339225
819	A8DYY5	A8DYY5	-0.583049	-0.645945
820	A8DYZ8;X2JDY7;P31368;X2J9L4;P31369;Q9VK71	A8DYZ8;X2JDY7;P31368	-0.307247	-0.150721
821	Q59DZ3;A8DZ03;A8DZ02;Q9VJW9	Q59DZ3;A8DZ03;A8DZ02;Q9VJW9	0.187205	0.213285
822	A8DZ18;M9PD76;P16621;M9NCY3;M9PDF7;M9PDR3;M9PG93	A8DZ18;M9PD76;P16621;M9NCY3;M9PDF7;M9PDR3;M9PG93	0.0197895	0.0668582
825	L0MLL1;Q8IMA6;Q7KQN3;A8DZ26;Q8IMA3;Q8IMA5;Q8IMA7;Q8SXV3	L0MLL1;Q8IMA6;Q7KQN3;A8DZ26	-0.403618	-0.417058
826	A8E6L6;Q9V6X7	A8E6L6;Q9V6X7	-0.0864699	-0.0449207
827	A8E6W0	A8E6W0	0.21054	0.283317
828	A8E702;Q9VMX0	A8E702;Q9VMX0	0.182785	0.195193
830	M9PBL6;A8JNJ6;Q7KV70;Q9VZQ3;Q7KV69	M9PBL6;A8JNJ6;Q7KV70;Q9VZQ3;Q7KV69	0.0657272	0.0766925
832	M9PBM2;M9PE05;A8JNJ9;M9PH77;Q8MSX1	M9PBM2;M9PE05;A8JNJ9;M9PH77;Q8MSX1	0.133245	0.153545
833	F2FB68;Q9VZI0;Q9I7T2;Q8IRC0;M9PEK8;M9PBN6;Q8IRB9;M9PE93;M9PHB1;A8JNK1;Q8IRC1	F2FB68;Q9VZI0;Q9I7T2;Q8IRC0;M9PEK8;M9PBN6;Q8IRB9;M9PE93;M9PHB1;A8JNK1;Q8IRC1	0.311629	0.258078
834	M9PBP3;M9PE52;M9NE16;M9NF07;M9NF10;M9NDH6;Q9VZD7;M9ND42;M9ND44;A8JNK4	M9PBP3;M9PE52;M9NE16;M9NF07;M9NF10;M9NDH6;Q9VZD7;M9ND42;M9ND44;A8JNK4	0.27108	0.209247
835	M9PEM7;M9PBU6;A8JNM3;Q7KU93;M9PEF2;Q7KU90;Q9VS85	M9PEM7;M9PBU6;A8JNM3;Q7KU93;M9PEF2;Q7KU90;Q9VS85	0.509447	0.493596
836	A8JNN5;Q9VSI2	A8JNN5;Q9VSI2	0.0442153	0.0723189
837	A8JNP2;A8JNP1;P48610	A8JNP2;A8JNP1;P48610	-0.0712453	-0.0567471
838	Q9V3C7;A8JNP7	Q9V3C7;A8JNP7	0.343423	0.320559
839	A8JNQ0;A8JNQ1;B7Z0G0;Q9VT70	A8JNQ0;A8JNQ1;B7Z0G0;Q9VT70	0.478314	0.419708
840	M9PF74;A8JNQ5;A8JNQ4;M9ND74;Q7YU08;Q9VT99;Q9VT98;M9NFQ7	M9PF74;A8JNQ5;A8JNQ4;M9ND74;Q7YU08;Q9VT99;Q9VT98;M9NFQ7	0.226749	-0.0117691
841	A8JNT7	A8JNT7	-0.976398	-0.730494
842	X2JGR4;A8JNU2;P00522;M9PFI8;M9PCT8;M9PFS1;M9PCU1;M9PI83;M9PFX0;M9PFI5	X2JGR4;A8JNU2;P00522;M9PFI8;M9PCT8;M9PFS1;M9PCU1;M9PI83;M9PFX0;M9PFI5	-0.00719795	-0.0783758
844	A8JNV1	A8JNV1	-0.500543	-0.49824
845	A8JNV4	A8JNV4	0.821785	0.99634
846	O96533;A8JNV5	O96533;A8JNV5	-1.44796	-1.22179
847	A8JNW5	A8JNW5	0.62803	0.541754
848	M9PGG0;M9PG88;M9PIL3;Q9VNS2;A8JNX0	M9PGG0;M9PG88;M9PIL3;Q9VNS2;A8JNX0	0.0741062	-0.00451834
850	Q9VH84;A8JQW3	Q9VH84;A8JQW3	0.640492	0.418408
851	A8JR14	A8JR14	0.244454	0.109254
852	A8JR42;Q9VE13;Q9VE16;Q4AB30	A8JR42;Q9VE13;Q9VE16;Q4AB30	3.15504	2.97275
853	A8JR46	A8JR46	-0.520132	-0.286879
854	A8JR82;E2QD55;A8JR81;E2QD56;E1JIT7	A8JR82;E2QD55;A8JR81;E2QD56;E1JIT7	0.0145152	0.150104
855	A8JR89;O77237	A8JR89;O77237	0.305435	0.304449
858	A8JUP8	A8JUP8	3.73773	4.25464
859	A8JUQ9;Q9NHV9;M9PHJ6	A8JUQ9;Q9NHV9;M9PHJ6	-0.219522	-0.134406
860	A8JUS8;Q9W5G0	A8JUS8;Q9W5G0	0.428708	0.375454
861	A8JUV0	A8JUV0	0.00622135	0.118636
862	E1JJP5;A8JUV3;Q9GU53;Q9VYA6;E1JJP6;M9PH25	E1JJP5;A8JUV3;Q9GU53;Q9VYA6;E1JJP6;M9PH25	-0.547936	-0.635482
863	A8JUV4	A8JUV4	1.15761	1.10861
864	Q9W4Y6;A8JUV7	Q9W4Y6;A8JUV7	1.21627	1.19791
865	Q9W4F6;A8JUX7	Q9W4F6;A8JUX7	-0.10837	-0.0379602
866	A8JUY0;Q9W4D2	A8JUY0;Q9W4D2	0.434365	0.485224
867	A8JUY3	A8JUY3	0.192026	0.247759
868	A8JV04;Q7YU03;A0A023GPV6	A8JV04;Q7YU03;A0A023GPV6	-0.0291099	0.0219835
869	A8JV07	A8JV07	0.465964	0.486672
870	A8JV18;Q9VXE6	A8JV18;Q9VXE6	0.401562	0.347204
871	A8JV22;X2JEJ0;Q9W3F6;A8JV24	A8JV22;X2JEJ0;Q9W3F6;A8JV24	0.156234	0.18541
874	A8Y535	A8Y535	0.187134	0.288159
875	A8Y560;O17445	A8Y560;O17445	-1.03624	-1.03572
876	Q7PLP4;A8Y582;Q7PLP5	Q7PLP4;A8Y582;Q7PLP5	-0.0413859	-0.10597
877	A8Y589	A8Y589	-0.091975	-0.180331
878	B3DN56;P47980	B3DN56;P47980	0.00895891	-0.108203
879	E1JIT0;B3DNL7;O01367;A0A0B4KHV5	E1JIT0;B3DNL7;O01367;A0A0B4KHV5	0.0736144	-0.0666268
880	B4F5C5;Q9VXT7	B4F5C5;Q9VXT7	0.0436257	0.442473
881	B4F5U4;Q9VYY2	B4F5U4;Q9VYY2	-0.400573	-0.409524
882	B5RIM9;P13706;M9PET0;M9PC43	B5RIM9;P13706;M9PET0;M9PC43	-0.210855	-0.181606
883	B5RIN0;M9PB50;Q9VMD6	B5RIN0;M9PB50;Q9VMD6	0.288848	0.310389
884	B5RIR1;Q24046	B5RIR1;Q24046	0.154493	-0.0133626
885	B5RIU6;Q8T390	B5RIU6;Q8T390	-0.120138	-0.197432
886	B5RIV0;Q9V3S9	B5RIV0;Q9V3S9	0.114241	0.122297
888	B5RJJ4	B5RJJ4	1.19413	1.12473
890	B5RJS0;X2JAX8;D5SHR1;M9MQH0;H1UUM2	B5RJS0;X2JAX8;D5SHR1;M9MQH0;H1UUM2	0.547878	0.726696
891	B6IDK2;Q9W568	B6IDK2;Q9W568	0.199531	0.0476769
892	B6IDN2;Q9V5E1	B6IDN2;Q9V5E1	-0.373567	-0.5131
893	B6IDQ5;Q9VRJ9;M9PED6	B6IDQ5;Q9VRJ9;M9PED6	-0.118043	-0.0404813
894	B6IDY8;Q9VUB4	B6IDY8;Q9VUB4	-0.486361	-0.20583
895	B6VQ99;M9PFW2	B6VQ99;M9PFW2	-0.156043	-0.138375
897	B7YZH8	B7YZH8	1.24241	0.802732
898	B7YZI0;Q9V7N5	B7YZI0;Q9V7N5	0.0499829	0.142912
900	B7YZJ4	B7YZJ4	-0.120043	-0.0274555
902	B7YZK4;B7YZK5;A0A0B4KG78;A0A0B4JCT7;B7YZK6	B7YZK4;B7YZK5;A0A0B4KG78;A0A0B4JCT7;B7YZK6	0.20519	0.108524
903	E1JGM8;Q0E917;B7YZL9	E1JGM8;Q0E917;B7YZL9	-0.242481	0.0968608
904	B7YZN4	B7YZN4	0.653678	0.690896
907	B7YZQ7	B7YZQ7	-0.288029	-0.453667
908	B7YZR7;E1JGK5;Q9V895	B7YZR7;E1JGK5;Q9V895	-0.173386	-0.0730039
909	B7YZS3;Q9W1A4	B7YZS3;Q9W1A4	0.348184	0.489395
910	B7YZS7;Q9V4L4	B7YZS7;Q9V4L4	0.299986	0.374119
911	B7YZT3;B7YZT2;A1Z6G3;Q8SYX2	B7YZT3;B7YZT2;A1Z6G3;Q8SYX2	-0.872285	-0.737406
913	M9PFS7;B7YZV6;Q9VK33	M9PFS7;B7YZV6;Q9VK33	0.0453215	-0.00627879
914	Q9VJJ8;Q9VJJ9;M9PD19;B7YZW3	Q9VJJ8;Q9VJJ9;M9PD19;B7YZW3	-0.0954232	0.00497991
915	M9PG55;Q9VJ42;B7YZX6	M9PG55;Q9VJ42;B7YZX6	-0.259105	-0.138195
916	B7YZX9;M9PD98;Q9VIM1	B7YZX9;M9PD98;Q9VIM1	1.12354	0.858606
917	B7YZY9;Q9Y0H4	B7YZY9;Q9Y0H4	0.134861	0.136227
918	B7YZZ0	B7YZZ0	-0.0126851	0.16239
919	B7YZZ9;P27864	B7YZZ9;P27864	0.0900584	0.124498
920	Q9VQL7;B7Z001	Q9VQL7;B7Z001	0.38108	0.555346
921	B7Z002;M9NEL3;Q9VPL9;M9NCY5;M9NDB7;Q9VPL6	B7Z002;M9NEL3;Q9VPL9;M9NCY5;M9NDB7	0.231816	0.233965
924	B7Z018	B7Z018	0.707416	0.718969
925	B7Z025;Q9VMF3;B7Z026	B7Z025;Q9VMF3;B7Z026	-0.130684	-0.0989742
926	B7Z031	B7Z031	-0.374929	-0.375341
927	Q9VZY2;B7Z043	Q9VZY2;B7Z043	0.522856	0.526167
929	E1JI11;M9PFP3;M9PI76;B7Z060;P47825;A4V201	E1JI11;M9PFP3;M9PI76;B7Z060;P47825;A4V201	-0.119393	-0.152665
930	B7Z068;Q9VVI3;M9PFK2;B7Z067;M9PFY9;Q8IQR5	B7Z068;Q9VVI3;M9PFK2;B7Z067;M9PFY9;Q8IQR5	0.0471587	0.100236
932	G4LTX2;B7Z073	G4LTX2;B7Z073	-0.253568	-0.224607
933	B7Z078;Q9VW25;B7Z083	B7Z078;Q9VW25	-0.446383	-0.549354
934	M9PCZ1;B7Z080;X2JBA7;B7Z082	M9PCZ1;B7Z080	-0.913216	-0.94859
935	B7Z098;Q9VNX8	B7Z098;Q9VNX8	-0.0847091	-0.074601
936	B7Z0B0;B7Z0B1	B7Z0B0;B7Z0B1	-0.112748	-0.0677765
937	B7Z0C9	B7Z0C9	0.363448	0.335368
938	B7Z0D7;Q9VSE1	B7Z0D7;Q9VSE1	0.349119	0.362014
939	B7Z0E0;Q8IQA7;Q9VSI6;Q7KUB0	B7Z0E0;Q8IQA7;Q9VSI6;Q7KUB0	0.450369	0.527555
940	B7Z0E2;M9ND61;Q9VSK3	B7Z0E2;M9ND61;Q9VSK3	-0.0415057	-0.0405375
941	B7Z0G1;Q02870	B7Z0G1;Q02870	0.0962498	0.164893
942	M9NDP2;B7Z0G3;Q9VTJ8	M9NDP2;B7Z0G3;Q9VTJ8	0.194008	0.0692724
943	B7Z0G4;Q7KUF9;Q9VTL9	B7Z0G4;Q7KUF9;Q9VTL9	-0.640349	-0.380464
944	B7Z0G7;Q9VW97;M9PFR5	B7Z0G7;Q9VW97;M9PFR5	0.19101	0.176722
945	B7Z0I5	B7Z0I5	0.177524	0.159346
946	B7Z0I7	B7Z0I7	-0.351837	-0.286713
947	B7Z0I8	B7Z0I8	0.294368	0.311163
948	B7Z0J4	B7Z0J4	0.269596	0.394551
950	B7Z0N0	B7Z0N0	0.27356	0.237876
951	B7Z0R2;Q9VAS8;A0A0B4KHD2	B7Z0R2;Q9VAS8;A0A0B4KHD2	0.240885	0.327636
952	Q86BR6;B7Z0R7;Q95TJ1	Q86BR6;B7Z0R7;Q95TJ1	0.229499	0.0878479
954	Q9VI13;B7Z0W0	Q9VI13;B7Z0W0	0.181372	0.146555
955	B7Z0W3;Q9VI21;E1JJ71	B7Z0W3;Q9VI21;E1JJ71	0.0383474	-0.00527556
956	B7Z0X1;Q9W457	B7Z0X1;Q9W457	-0.237657	-0.232277
957	B7Z0X3;Q0KHV9;X2JAH8;Q9W4E2;B7Z0W8;X2JE60	B7Z0X3;Q0KHV9;X2JAH8;Q9W4E2;B7Z0W8;X2JE60	0.175045	0.0733548
958	B7Z0X7	B7Z0X7	-0.381607	-0.326224
959	F2FBA6;B7Z0Z0;Q24537	F2FBA6;B7Z0Z0;Q24537	-0.170676	-0.34783
960	B7Z0Z1;Q9VXG1	B7Z0Z1;Q9VXG1	0.249824	0.211962
961	B7Z107	B7Z107	-0.471118	-0.315579
962	X2JA05;B7Z114;Q9W5E1	X2JA05;B7Z114;Q9W5E1	-0.810915	-0.880715
964	B7Z131;B7Z132;X2JIR4;M9PJ95;B7Z129;M9PGJ9;B7Z130;O77086	B7Z131;B7Z132;X2JIR4;M9PJ95;B7Z129;M9PGJ9;B7Z130;O77086	0.314185	0.404053
965	B7Z138;Q9W2X2;X2JB32;Q8IRL5;X2JD61;X2JEC6;X2JEP7;X2JJ95;B7Z140;X2JB38	B7Z138;Q9W2X2;X2JB32;Q8IRL5;X2JD61;X2JEC6;X2JEP7;X2JJ95;B7Z140;X2JB38	0.313149	0.389704
967	Q9VI18;B9A0M7	Q9VI18;B9A0M7	0.396073	0.303907
970	X2JCX8;C0HKA1;C0HKA0	X2JCX8;C0HKA1;C0HKA0	-0.538584	-0.598285
971	C0MIY4;Q9V464	C0MIY4;Q9V464	-0.109239	-0.0584365
972	C0MJA0;Q05783	C0MJA0;Q05783	-0.177866	-0.289333
975	C0PV74;Q9VYS0;H0RNK3	C0PV74;Q9VYS0;H0RNK3	-1.14604	-1.27089
976	Q7KUU5;C0PVB3	Q7KUU5;C0PVB3	-0.143808	-0.278017
977	E2QD63;Q86DS1;C4NYP8	E2QD63;Q86DS1;C4NYP8	-0.189956	-0.158221
978	C5WLN1;Q9VYA0	C5WLN1;Q9VYA0	0.00211231	-0.00830035
979	C6SUW3;P55935;Q95RG1	C6SUW3;P55935;Q95RG1	-0.492196	-0.448378
980	X2J9A4;C6SV41;Q9VL50;Q9VL49	X2J9A4;C6SV41;Q9VL50;Q9VL49	0.133399	0.152702
981	C6TP87;P08736	C6TP87;P08736	-0.327483	-0.306757
982	C7LA75;P11147	C7LA75;P11147	-0.359354	-0.364303
983	E1JJ68;C7LAE4;A0A0B4K624;A0A0B4K6A3;A0A0B4K6K1;A0A0B4K6T7	E1JJ68;C7LAE4;A0A0B4K624;A0A0B4K6A3;A0A0B4K6K1;A0A0B4K6T7	0.333444	-0.278074
984	C7LAG1;Q59E36;M9PJR2	C7LAG1;Q59E36	0.00558654	0.0151523
985	M9PHG2;C7LAH9	M9PHG2;C7LAH9	0.531226	0.50501
986	C8VV14;P07764	C8VV14;P07764	-0.476905	-0.531983
987	C8VV60;Q9VTX8;M9NE87	C8VV60;Q9VTX8;M9NE87	0.0130267	0.0772152
988	C8VV95;P11420	C8VV95;P11420	0.850774	0.62729
989	C9QP21;P08171	C9QP21;P08171	-1.42462	-1.15907
990	C9QP42;Q02748	C9QP42;Q02748	0.110083	0.120871
1038	D0IQG7;Q9W092	D0IQG7;Q9W092	0.193243	0.214893
1039	M9PG83;D0IQJ8;Q03751	M9PG83;D0IQJ8;Q03751	0.152733	0.271031
1040	D0IQK3;Q961Q7	D0IQK3;Q961Q7	-0.591117	-0.631231
1041	D0Z760;P35820	D0Z760;P35820	-0.643748	-0.295509
1042	D1FYH5;Q9VAJ4	D1FYH5;Q9VAJ4	0.714301	0.646753
1043	D1FYT3;Q9VAI6	D1FYT3;Q9VAI6	0.349651	-0.519276
1044	D1YSG7;Q00168;L0MLR4;L0MLP2	D1YSG7;Q00168;L0MLR4;L0MLP2	0.272264	0.257536
1047	D1Z3A1;Q9VZS5;REV__Q9VGU6	D1Z3A1;Q9VZS5	-0.402139	-0.345098
1048	D1Z3A2;Q24407	D1Z3A2;Q24407	-0.302212	-0.263055
1049	D2NUK9;Q9U3Z7	D2NUK9;Q9U3Z7	0.234767	0.266028
1051	M9PF42;Q9VLT9;M9NEC0;D3DML3	M9PF42;Q9VLT9;M9NEC0;D3DML3	-0.0351055	-0.0458107
1052	D3DMM4;Q86B97;Q9VGE9;Q86B96;Q86B95;Q9VGF0;Q86B94	D3DMM4;Q86B97;Q9VGE9;Q86B96;Q86B95;Q9VGF0;Q86B94	0.766447	0.588297
1053	D3DMP0	D3DMP0	0.027453	0.134069
1054	D3DMP8;P10735	D3DMP8;P10735	-0.126444	-0.013908
1055	D3PFH9;E1JIW2;Q6NN85	D3PFH9;E1JIW2;Q6NN85	0.553064	0.623842
1057	D5A7M1;Q9W1C9	D5A7M1;Q9W1C9	0.108796	0.0931255
1058	Q9VV51;D5AEK7;Q961F9	Q9VV51;D5AEK7;Q961F9	-0.14349	-0.0864822
1060	D5SHN0;Q9VD25	D5SHN0;Q9VD25	0.0509905	0.0785802
1062	D5SHV2;Q9V9N9	D5SHV2;Q9V9N9	-0.251002	0.201242
1063	D6W4U9;Q8IQG1	D6W4U9;Q8IQG1	-0.0857334	-0.121962
1064	D8FT19;M9PCH3;Q9XZ28	D8FT19;M9PCH3;Q9XZ28	0.23253	0.355117
1065	E0R7Q5;Q9VQP9	E0R7Q5;Q9VQP9	-0.135886	-0.318464
1066	E1JGK6;P25159	E1JGK6;P25159	-0.100111	-0.0852831
1067	E1JGK7;Q7KRI2;Q9VD05	E1JGK7;Q7KRI2	-0.0634536	0.0014908
1068	E1JGK8	E1JGK8	-0.667046	-0.488241
1069	E1JGN0	E1JGN0	0.0433344	-0.0175276
1073	E1JGR4	E1JGR4	-0.0262668	-0.022732
1074	E1JGV6;O44081;A0A0B4K8B2	E1JGV6;O44081;A0A0B4K8B2	0.0613146	0.0741016
1075	E1JGX2;P32865	E1JGX2;P32865	0.0542221	0.149265
1076	E1JGZ3	E1JGZ3	0.7177	0.692423
1077	E1JGZ9;Q9XZJ4	E1JGZ9;Q9XZJ4	-0.254514	-0.231368
1078	E1JH01;Q9V345	E1JH01;Q9V345	0.130059	0.106953
1079	E1JH07	E1JH07	-0.190505	-0.149783
1080	E1JH26;A1Z850	E1JH26;A1Z850	0.325118	0.248604
1081	E1JH39;Q7JUM5;A5YTR9;A1Z8Q7	E1JH39;Q7JUM5;A5YTR9;A1Z8Q7	0.153432	0.38251
1082	Q7JUX2;E1JH43	Q7JUX2;E1JH43	-0.329353	-0.563837
1083	E1JH57;Q7K3L1	E1JH57;Q7K3L1	0.447529	0.30682
1084	E1JH67;Q9V751;P45884	E1JH67;Q9V751;P45884	0.294414	-0.283405
1085	E1JH71;Q7K3B9	E1JH71;Q7K3B9	0.238345	0.0967971
1086	E1JH76;E2QCE8;Q9BJZ5;A0A0B4K880	E1JH76;E2QCE8;Q9BJZ5	-0.0500086	-0.0841309
1087	E1JHA4;P48809	E1JHA4;P48809	-0.194438	-0.245209
1088	Q9VM55;E1JHA6	Q9VM55;E1JHA6	0.0916321	0.0527516
1089	E1JHC8;Q9VLA1	E1JHC8;Q9VLA1	0.87511	0.888568
1090	E1JHD6;P92208	E1JHD6;P92208	-0.664189	-0.811225
1091	E1JHE1;Q9VKW4	E1JHE1;Q9VKW4	-0.100648	0.109765
1092	Q9VKU1;E1JHE4	Q9VKU1;E1JHE4	-0.119007	0.0565238
1093	E1JHG8;Q9VK68	E1JHG8;Q9VK68	-0.121328	-0.213021
1094	E1JHJ9;Q9VJE5;B7YZW8;E1JHK0;Q7KT48;M9PG37;B7YZW7;Q0E8Q1;M9PBC9;M9PDB4;X2JAQ4;Q0E8Q0	E1JHJ9;Q9VJE5;B7YZW8;E1JHK0;Q7KT48;M9PG37	0.0713141	0.129388
1095	E1JHK3;C7LA93;P15330	E1JHK3;C7LA93;P15330	-0.312421	-0.365083
1096	E1JHM1;M9PDR8;Q9VIS1;E1JHM0	E1JHM1;M9PDR8;Q9VIS1;E1JHM0	0.40245	0.404331
1097	E1JHN2;Q9VIF3	E1JHN2;Q9VIF3	1.37928	1.64143
1098	E1JHP9;Q9VPI6;M9NCX9	E1JHP9;Q9VPI6;M9NCX9	-0.517031	-0.671168
1100	E1JHQ1;P20477	E1JHQ1;P20477	-0.0648843	-0.00118075
1101	E1JHR9;P32023	E1JHR9;P32023	0.0798969	0.0491406
1102	E1JHT6;Q9VMV9	E1JHT6;Q9VMV9	-0.267184	-0.268385
1103	M9PE12;E1JHV6;M9PDH1;Q9W0T1;M9PBG5;E1JHV7	M9PE12;E1JHV6;M9PDH1;Q9W0T1;M9PBG5;E1JHV7	0.106122	0.0851086
1105	E1JHX5;Q7K0L4	E1JHX5;Q7K0L4	-0.229711	-0.258502
1106	Q9VUH7;E1JI03	Q9VUH7;E1JI03	0.0420563	-0.039774
1107	M9NDT7;M9NG14;M9PI84;M9PCU3;M9NEC1;M9PFS5;E1JI13;P98081	M9NDT7;M9NG14;M9PI84;M9PCU3;M9NEC1;M9PFS5;E1JI13;P98081	1.92766	1.8987
1108	E1JI22;Q9VWA1	E1JI22;Q9VWA1	0.0310054	0.0374001
1109	M9PIA6;E1JI46;Q59E34;O97159	M9PIA6;E1JI46;Q59E34;O97159	0.0543781	0.0233227
1110	E1JI58;Q9VP85	E1JI58;Q9VP85	0.489617	0.348259
1111	E1JI84;Q8IQC1	E1JI84;Q8IQC1	0.483763	0.469474
1114	E1JIB4;Q9VZW2;Q8MRH9	E1JIB4;Q9VZW2;Q8MRH9	0.135413	0.187522
1118	E1JIG1;P29503	E1JIG1;P29503	-0.208981	-0.136938
1120	Q961C3;Q9VH75;E1JIH4	Q961C3;Q9VH75;E1JIH4	0.400762	0.401211
1121	E1JIH5;Q8MSX2	E1JIH5;Q8MSX2	0.2891	0.359904
1122	E1JIJ5;P31409	E1JIJ5;P31409	0.28085	0.215925
1123	E1JIK0;P48810	E1JIK0;P48810	0.0750673	0.119381
1124	Q7KSI9;E1JIL1	Q7KSI9;E1JIL1	-0.836075	-0.545753
1125	E1JIL4;Q24572	E1JIL4;Q24572	-0.0135589	0.0354551
1126	Q7KSE8;E1JIN6;Q8IN94;A0A0B4KHB1;A0A0B4KGD1	Q7KSE8;E1JIN6;Q8IN94;A0A0B4KHB1;A0A0B4KGD1	0.48506	0.389584
1128	E1JIP3;Q9VE86;E8NH59	E1JIP3;Q9VE86;E8NH59	-0.340778	-0.239313
1130	E1JIR3;P23573	E1JIR3;P23573	0.128153	0.0993544
1131	E1JIS1;Q0KI33;Q59DV6;Q9VD98;E1JIS2	E1JIS1;Q0KI33;Q59DV6;Q9VD98;E1JIS2	0.583428	0.482466
1132	E1JIT4;Q9VCZ8	E1JIT4;Q9VCZ8	-0.164381	-0.143318
1133	E1JIV0;Q9VCF0	E1JIV0;Q9VCF0	-0.506529	-0.456104
1134	E1JIV6;O62618	E1JIV6;O62618	-0.434294	-0.43928
1136	E1JIY8	E1JIY8	0.895478	1.03362
1137	E1JIZ3;Q9VB98	E1JIZ3;Q9VB98	0.310471	0.403506
1139	E1JIZ7	E1JIZ7	0.874928	0.461517
1141	E1JJ73;O97067	E1JJ73;O97067	-0.313809	-0.179428
1142	E1JJ86;Q6IKI1	E1JJ86;Q6IKI1	-0.520111	-0.61407
1143	E1JJ98;P27398	E1JJ98;P27398	0.153326	0.0513086
1144	X2JDB3;E1JJC3;X2JHT7;O97394;X2JDR3	X2JDB3;E1JJC3;X2JHT7;O97394;X2JDR3	-0.0708191	-0.120489
1145	X2JCI4;E1JJD5;P13217	X2JCI4;E1JJD5;P13217	-0.980277	-0.872097
1146	Q8IRS0;E1JJE4;X2JCK2;Q9W4F5	Q8IRS0;E1JJE4;X2JCK2;Q9W4F5	-0.055985	0.0202226
1147	E1JJF3;Q9V427	E1JJF3;Q9V427	-0.350856	-0.51454
1148	E1JJF4;Q9U969	E1JJF4;Q9U969	0.0253555	0.164943
1150	E1JJF9;E1JJF8;M9NEZ5;P20241	E1JJF9;E1JJF8;M9NEZ5;P20241	-0.0670588	0.034396
1151	E1JJG4;Q9W395	E1JJG4;Q9W395	0.264415	0.250039
1152	E1JJI5;P54367	E1JJI5;P54367	-0.284523	-0.286241
1153	E1JJK9;E1JJK7;X2JF93;P43125;E1JJK8;E1JJK6;M9PJM8;M9PEJ5	E1JJK9;E1JJK7;X2JF93;P43125;E1JJK8;E1JJK6;M9PJM8;M9PEJ5	0.277382	0.0801833
1154	E1JJL4;P30432;E1JJL5	E1JJL4;P30432	0.451202	0.488345
1155	E1JJM7;Q8IR79;E1JJM8	E1JJM7;Q8IR79;E1JJM8	0.488225	0.676979
1156	E1JJM9;P48149	E1JJM9;P48149	-0.430665	-0.477151
1157	E1JJN1;P35128;Q9VJS5	E1JJN1;P35128	-0.463437	-0.385682
1158	Q9VX41;E1JJN6;M9PF12;X2JE74	Q9VX41;E1JJN6;M9PF12;X2JE74	-0.00755257	0.105787
1159	E1JJN9;Q9VYD1	E1JJN9;Q9VYD1	0.565177	0.718533
1160	E1JJQ3;Q8IQW7;X2JG40;E1JJQ4;Q9XYP7	E1JJQ3;Q8IQW7;X2JG40;E1JJQ4;Q9XYP7	0.241437	0.177588
1161	E1JJR3;Q9VWI1	E1JJR3;Q9VWI1	0.16573	0.340296
1162	X2JFY0;E1JJR9;Q9VR81	X2JFY0;E1JJR9;Q9VR81	1.42823	1.02395
1163	Q9VRA4;E1JJS1	Q9VRA4;E1JJS1	0.502923	0.56238
1164	E2QC56;Q7K4Q5	E2QC56;Q7K4Q5	0.0545469	0.0598438
1165	E2QC61;Q7K480	E2QC61;Q7K480	0.698423	0.669215
1166	E2QC72;Q6NLL1	E2QC72;Q6NLL1	-0.756531	-0.457376
1167	E2QC83;Q7KNF2	E2QC83;Q7KNF2	0.0163048	-0.00737377
1168	E2QCG7;Q0E940	E2QCG7;Q0E940	-0.05519	0.0181331
1169	E2QCK0;Q961C9;A0A0B4LG59	E2QCK0;Q961C9	0.290073	0.145954
1170	E2QCL8;O01404	E2QCL8;O01404	0.0395958	0.158855
1171	E2QCN9	E2QCN9	0.242064	0.243929
1172	E2QCP0;P84249	E2QCP0;P84249	0.308456	0.502239
1174	E2QCQ7;Q7K237	E2QCQ7;Q7K237	-0.0194575	-0.160293
1175	E2QCR4;Q24009	E2QCR4;Q24009	-0.418651	-0.32603
1176	Q9VQ76;E2QCS8;M9PE28	Q9VQ76;E2QCS8;M9PE28	-0.148411	-0.1258
1179	E2QCZ3;E2QCZ4	E2QCZ3	-0.297406	-0.508419
1180	E2QCZ5	E2QCZ5	0.627524	0.735416
1182	E2QCZ9;Q7JZB4	E2QCZ9;Q7JZB4	-0.684512	-0.647748
1183	E2QD00;Q7K1V5	E2QD00;Q7K1V5	-0.121163	-0.151482
1184	E2QD64;Q7K4H4	E2QD64;Q7K4H4	-0.114498	0.0481815
1185	E2QD65;P39018	E2QD65;P39018	-0.177355	-0.177685
1186	E2QD75;Q7K4N3	E2QD75;Q7K4N3	0.0485526	0.0327611
1187	Q9W3H6;Q7KVT3;X2JCZ1;M9PJD0;E2QD98;Q6NR03;Q0KHU9;X2JIZ6;Q9W3H8;Q9W3H7;M9NG38;M9NEZ2	Q9W3H6;Q7KVT3;X2JCZ1;M9PJD0;E2QD98;Q6NR03;Q0KHU9;X2JIZ6;Q9W3H8;Q9W3H7;M9NG38;M9NEZ2	0.23423	0.123604
1188	E4NKG1;Q9I7D3	E4NKG1;Q9I7D3	0.203681	0.172912
1191	E6PBV6;Q8SWU7	E6PBV6;Q8SWU7	-0.0235974	0.0377378
1192	M9PJI4;E8NH13;E1JJH6;M9NGZ2;M9PHK8	M9PJI4;E8NH13;E1JJH6;M9NGZ2;M9PHK8	-0.0194993	-0.0516276
1193	E8NHB1;Q24325	E8NHB1;Q24325	0.202074	0.226729
1194	E8NHB3;M9MSJ1;Q8MQJ9	E8NHB3;M9MSJ1;Q8MQJ9	-0.137443	-0.07225
1195	F0JAG6	F0JAG6	0.0595177	0.0831415
1197	F0JAI1;Q9VH48	F0JAI1;Q9VH48	-0.10734	-0.0836467
1199	Q8I0Q7;F0JAM2;Q9VZI4;Q8IRC2;E1JIC5;E1JIC6;Q95U18	Q8I0Q7;F0JAM2;Q9VZI4;Q8IRC2;E1JIC5;E1JIC6;Q95U18	-0.240782	-0.0751174
1200	M9PFH0;M9PF27;Q95SE8;F0JAQ9;Q9VU19	M9PFH0;M9PF27;Q95SE8;F0JAQ9;Q9VU19	0.696265	0.560749
1201	Q9VKM2;M9PCP4;M9NCT2;H5V8D0;X2J5L4;F2FB81	Q9VKM2;M9PCP4;M9NCT2;H5V8D0;X2J5L4;F2FB81	0.710458	0.651201
1202	F3YDH0;P29844	F3YDH0;P29844	-0.221378	-0.189966
1203	F3YDJ5;O97172	F3YDJ5;O97172	-0.00416674	-0.0174112
1204	F3YDM8;Q9VYI3	F3YDM8;Q9VYI3	-0.236313	-0.178435
1205	F6J1D0;P40423	F6J1D0;P40423	-0.0522479	-0.0254623
1206	F6JQA6;O77277	F6JQA6;O77277	0.37371	0.333482
1207	G2J5Z0;B7YZH7	G2J5Z0;B7YZH7	-0.082247	-0.144506
1208	G3M3A2;Q06559	G3M3A2;Q06559	-0.537531	-0.505761
1209	G4LTX1;Q8IQ56	G4LTX1;Q8IQ56	-0.58367	-0.497153
1210	G7H829;Q9V3Z6	G7H829;Q9V3Z6	0.157079	0.0972857
1211	H0RNC9;Q9VMH7	H0RNC9;Q9VMH7	-0.476842	-0.730961
1212	H0RNI8;A0A0B4LGI9	H0RNI8;A0A0B4LGI9	-0.0531849	-0.0757673
1213	H0RNK7;Q9W261	H0RNK7;Q9W261	-0.308427	-0.287854
1214	H0RNN8;Q9VLK2	H0RNN8;Q9VLK2	0.12563	0.0484342
1215	H1UUB1;P18489	H1UUB1;P18489	-0.0777152	0.0735523
1216	H1UUH6;Q9VC99;B7Z0P8	H1UUH6;Q9VC99;B7Z0P8	-0.36313	-0.374362
1217	H1UUI2;Q9VN03	H1UUI2;Q9VN03	-0.112644	0.0356551
1219	H5V895;Q8T0U6;P48462	H5V895;Q8T0U6;P48462	-0.0402423	-0.133133
1221	H8F4T6;Q9V6U9	H8F4T6;Q9V6U9	0.388053	0.44598
1222	H8F4V5;Q9VRM7	H8F4V5;Q9VRM7	-0.416443	-0.338197
1223	H9XVL5;Q9V4A7	H9XVL5;Q9V4A7	-0.0675202	0.0170674
1227	M9PDF9;I0B8L2;Q9V3D5	M9PDF9;I0B8L2;Q9V3D5	-0.185402	-0.184832
1228	I0DHK3;P12881	I0DHK3;P12881	-0.0134463	0.0122889
1230	L0MLQ9;Q8IH18	L0MLQ9;Q8IH18	0.266624	0.258306
1231	L0MNA8;P40945	L0MNA8;P40945	0.084585	-0.0799939
1232	L0MPS3;Q9V496	L0MPS3;Q9V496	0.0332103	0.0332989
1233	X2J9E8;L0MQ08;Q9V498	X2J9E8;L0MQ08;Q9V498	-0.683068	-0.439076
1234	L7ED64;L7EEF9;Q8MQI6	L7ED64;L7EEF9;Q8MQI6	-0.4051	-0.115854
1236	M9MQH9;P36179	M9MQH9;P36179	0.208125	0.192509
1237	M9MRC9;P41092	M9MRC9;P41092	-0.313362	-0.343826
1238	M9MRD0;P35122;M9PE40	M9MRD0;P35122;M9PE40	-0.23194	-0.209081
1239	M9MRD3;Q9VMS6;M9PC27;M9PB42;P11929	M9MRD3;Q9VMS6;M9PC27;M9PB42;P11929	-0.0490458	-0.0497275
1240	M9MRF2;Q9VMU4	M9MRF2;Q9VMU4	-0.707349	-0.676769
1241	M9MRG1;Q9VLF6	M9MRG1;Q9VLF6	0.0814682	0.0739942
1243	M9MRG4;Q9VL07;M9PCJ7;Q76NQ3	M9MRG4;Q9VL07;M9PCJ7;Q76NQ3	-0.220848	-0.167605
1244	M9MRH0;Q9VKU8;M9PFI9;Q9VKV0	M9MRH0;Q9VKU8	-0.376503	-0.351811
1245	M9MRH8;Q8IPB9;Q9VKX1	M9MRH8;Q8IPB9;Q9VKX1	-1.2515	-1.08342
1246	M9PB77;M9PFA5;M9MRI2;Q0E8S4;M9PCL7;Q24322	M9PB77;M9PFA5;M9MRI2;Q0E8S4;M9PCL7;Q24322	0.000825087	0.0712113
1247	M9MSI8;M9MRP6;M9MRV1;M9MRK7;X2JAP2;X2JA38	M9MSI8;M9MRP6;M9MRV1;M9MRK7;X2JAP2;X2JA38	-0.775212	-0.938791
1248	M9MRL4	M9MRL4	0.489326	0.171195
1250	M9MRM4;Q9W0I6	M9MRM4;Q9W0I6	-0.00152388	0.040926
1251	M9MSK4;M9MRQ6;Q9NFP5;M9MRR7	M9MSK4;M9MRQ6;Q9NFP5;M9MRR7	0.299835	0.32697
1252	M9MRQ9;Q94522;Q9VDW7	M9MRQ9;Q94522	-0.201236	-0.18755
1254	M9MRS7;Q23978	M9MRS7;Q23978	-0.00459207	-0.0471507
1255	Q9VSQ0;M9MRS9;Q9VSQ1;M9MSK7;M9NFP9	Q9VSQ0;M9MRS9;Q9VSQ1;M9MSK7;M9NFP9	-0.48939	-0.429216
1257	M9MRT6;P08645	M9MRT6;P08645	-0.281463	-0.181956
1258	Q9VZG5;M9MRV7;M9NE09	Q9VZG5;M9MRV7;M9NE09	0.200779	0.39454
1259	M9MRW0;M9PEI6;Q8IQ71;Q9VRY3	M9MRW0;M9PEI6;Q8IQ71	0.341186	0.332317
1260	M9MRW4;Q9VS59	M9MRW4;Q9VS59	-0.110118	-0.114673
1261	M9MRX8;P37193	M9MRX8;P37193	-0.275032	-0.335192
1262	M9MRY3;P16905;M9MS72;M9MS37;H1UUF3;Q9VPA7;M9MS76	M9MRY3;P16905;M9MS72;M9MS37;H1UUF3;Q9VPA7;M9MS76	-0.411118	-0.354687
1264	M9MS15;P23654	M9MS15;P23654	-0.28244	-0.229796
1265	M9MS35;Q9W352	M9MS35;Q9W352	0.686027	0.568543
1266	Q9W321;M9MS40;M9PH39	Q9W321;M9MS40;M9PH39	-0.0244751	0.00947366
1267	M9MS42;Q8IRM7;Q9W324;Q9W323;Q59E68;Q8IRM6	M9MS42;Q8IRM7;Q9W324;Q9W323;Q59E68;Q8IRM6	0.0924048	0.0354876
1269	Q9VYD8;M9MS48	Q9VYD8;M9MS48	0.854909	0.647098
1271	M9MS90;Q9W326;D5SHR3;Q9W325	M9MS90;Q9W326	0.708102	0.499154
1272	M9MSC9;M9MSA2;Q9VY77	M9MSC9;M9MSA2;Q9VY77	0.341025	0.310717
1273	M9MSE8;X2JFL7;X2JKZ0;X2JE83;Q8IQZ6;M9MSB6;X2JCD6;Q8T498	M9MSE8;X2JFL7;X2JKZ0;X2JE83;Q8IQZ6;M9MSB6;X2JCD6;Q8T498	-0.773228	-0.567573
1276	M9MSJ7;M9PGW2;Q9W081	M9MSJ7	0.734118	-0.424588
1277	M9MSK3;P00528;X2JCI2	M9MSK3;P00528;X2JCI2	0.287975	0.243746
1278	M9MSL0;Q9VU16	M9MSL0;Q9VU16	0.375912	0.439517
1279	M9MSL3;Q9VUC1	M9MSL3;Q9VUC1	-0.242716	-0.260239
1280	Q960T6;M9MSL4;M9PCK8	Q960T6;M9MSL4;M9PCK8	0.117953	-0.0257641
1281	Q7YZA4;Q8IRY0;M9MSM5	Q7YZA4;Q8IRY0;M9MSM5	0.265968	0.265789
1282	M9NCM6;M9PDR5;Q8SX83;M9PBZ3;M9PBJ8	M9NCM6;M9PDR5;Q8SX83;M9PBZ3;M9PBJ8	0.544164	0.552029
1284	M9NCT3;Q9VKL9;M9NEE5;Q8IPB2	M9NCT3;Q9VKL9;M9NEE5;Q8IPB2	-0.794963	-0.813215
1285	M9NCV1;Q9VJD3	M9NCV1;Q9VJD3	0.364507	0.339804
1286	M9NCX1;P08111;M9PBJ2	M9NCX1;P08111;M9PBJ2	-0.340609	-0.34227
1287	M9PDV1;M9NCZ5;P48608;D1Z399	M9PDV1;M9NCZ5;P48608	0.227	0.208995
1288	M9ND06;Q9VQ37;M9NDD0	M9ND06;Q9VQ37;M9NDD0	-0.328789	-0.523135
1289	M9ND16;Q7KU24;M9PEB2	M9ND16;Q7KU24;M9PEB2	0.572017	0.493563
1290	M9ND19;Q9W0P5	M9ND19;Q9W0P5	0.0290202	0.0524931
1294	M9ND57;Q9VS82;M9PEE7;B7Z0D3;Q9VS83;M9PHN9;M9PBU3;B7Z0D4	M9ND57;Q9VS82;M9PEE7;B7Z0D3;Q9VS83;M9PHN9;M9PBU3;B7Z0D4	0.353904	0.273463
1295	M9ND86;P43248	M9ND86;P43248	0.0721934	0.0844166
1296	M9ND93;M9PCJ5;Q400N2;M9PFP0;M9PI63;M9PFA8;M9PFJ2;M9PCK2;M9NFV3;M9PFA3;M9PFP4;Q400N1	M9ND93;M9PCJ5;Q400N2;M9PFP0;M9PI63;M9PFA8;M9PFJ2;M9PCK2;M9NFV3;M9PFA3;M9PFP4	0.177337	0.137625
1297	M9NDA1;M9NEB2;Q8MV37;Q8IQN4;M9PCQ3;M9NFZ0;A8JNT6;Q9VUX7	M9NDA1;M9NEB2;Q8MV37;Q8IQN4;M9PCQ3	0.300734	0.253156
1298	M9NDA6;Q8I7C3;M9NFH3	M9NDA6;Q8I7C3;M9NFH3	0.314847	0.218574
1299	M9NDC3;O18388	M9NDC3;O18388	0.308178	0.323005
1300	M9NDC9;P91664	M9NDC9;P91664	0.19109	0.138586
1302	M9NDH8;Q9VZD5	M9NDH8;Q9VZD5	0.10566	0.117596
1303	M9NDL7;Q8MQS4	M9NDL7;Q8MQS4	-0.0181195	-0.109976
1304	Q8IQA6;Q9VSK5;Q7KUA8;Q86BH2;M9NDL9;M9PHT1;M9PES2	Q8IQA6;Q9VSK5;Q7KUA8;Q86BH2;M9NDL9;M9PHT1;M9PES2	0.243031	0.275324
1305	M9NDM4;Q9V3J8	M9NDM4;Q9V3J8	-0.309044	-0.336755
1306	M9NDP1;Q24117;M9NDC7;O96860	M9NDP1;Q24117;M9NDC7;O96860	0.0110477	-0.014929
1308	Q9VUD7;M9NFB8;M9NE94;M9NDQ8;Q8T0E0;Q7KUK1;M9NFB1;Q6NN29;M9ND89	Q9VUD7;M9NFB8;M9NE94;M9NDQ8;Q8T0E0;Q7KUK1;M9NFB1;Q6NN29;M9ND89	-0.0606814	-0.0306464
1309	M9PI67;M9NEA3;M9NDR9;Q9VUQ8	M9PI67;M9NEA3;M9NDR9;Q9VUQ8	0.167272	0.0440163
1310	M9NGW5;M9NDS5;B7Z134;Q6IDE0;Q9W391;X2JJ32	M9NGW5;M9NDS5;B7Z134;Q6IDE0;Q9W391;X2JJ32	0.6854	0.57004
1311	M9NDS8;A8JNT4	M9NDS8;A8JNT4	0.709962	0.546403
1312	M9NDU8;Q9VVG6	M9NDU8;Q9VVG6	0.855454	0.750168
1313	M9NDW0;M9PEI3;Q9VYA8	M9NDW0;M9PEI3;Q9VYA8	-0.0566673	0.0244739
1315	M9NDW6;Q8IQV6;M9NEF4;Q9VWA0;Q8IQV5;M9NG75;M9NFL3	M9NDW6;Q8IQV6;M9NEF4;Q9VWA0	1.17268	1.02897
1316	M9NDX3;Q494M1;P30189;Q8IR39;X2JKD2	M9NDX3;Q494M1;P30189;Q8IR39;X2JKD2	-0.0918551	-0.0514657
1317	M9NDZ4;M9NF89;Q24562;M9NH51;Q9W1T4	M9NDZ4;M9NF89;Q24562;M9NH51	-0.100547	-0.0572485
1318	M9NE01;Q27889	M9NE01;Q27889	0.465581	0.453054
1319	M9NE25;Q9W5E0	M9NE25;Q9W5E0	-0.916712	-0.866325
1321	M9NE67;P07207	M9NE67;P07207	0.244144	0.148614
1322	M9NE68;P02516	M9NE68;P02516	-1.24455	-1.03804
1323	M9NFQ5;M9NE70;M9PEP1;M9ND72	M9NFQ5;M9NE70;M9PEP1;M9ND72	0.26663	0.24671
1324	M9NE73;Q9VT65;Q9VXH6	M9NE73;Q9VT65	-0.0491449	0.00942948
1325	M9NE89;P08928	M9NE89;P08928	-0.132968	-0.15913
1326	M9NE97;Q9W3X9	M9NE97;Q9W3X9	-0.855345	-0.652154
1327	Q9GQR5;Q8IPK0;M9NEA1;Q9VMH3	Q9GQR5;Q8IPK0;M9NEA1;Q9VMH3	0.486504	0.543828
1328	M9NED8;Q8SY41	M9NED8;Q8SY41	-0.0106954	0.11505
1330	M9NEL1;Q9VXF1	M9NEL1;Q9VXF1	0.149411	0.210661
1331	M9NEQ5;Q9VJD2	M9NEQ5;Q9VJD2	-0.559574	-0.475859
1332	M9NEQ9;Q9VWG3	M9NEQ9;Q9VWG3	-0.238029	-0.213282
1333	M9NEU5;P25843	M9NEU5;P25843	-0.50607	-0.484334
1334	M9NEV0;Q9VMJ7	M9NEV0;Q9VMJ7	-0.00346205	-0.00217682
1335	M9NEV7;Q9VII1	M9NEV7;Q9VII1	-0.2497	-0.390037
1336	M9NEW0	M9NEW0	-0.327891	0.0309805
1337	M9NEY5;M9NEY3;M9NFI9;M9NDX8;Q9W003;M9NFI2;X2JC06	M9NEY5;M9NEY3;M9NFI9;M9NDX8;Q9W003;M9NFI2;X2JC06	0.277973	0.287137
1338	M9NEZ0;Q9VKJ9	M9NEZ0;Q9VKJ9	-0.364932	-0.179941
1339	M9NF00;Q9U4H5	M9NF00;Q9U4H5	0.701405	0.539989
1342	M9NF18;Q9VYW5;M9NED4	M9NF18;Q9VYW5;M9NED4	-0.0858327	-0.146693
1343	Q9V3K7;M9NF32	Q9V3K7;M9NF32	0.290101	0.253344
1344	M9NF33;Q9VSH4	M9NF33;Q9VSH4	0.0156575	0.0768494
1345	M9NF48	M9NF48	0.965453	1.13808
1346	M9NF67;Q9VT40	M9NF67;Q9VT40	0.109077	0.144921
1347	M9NF69;Q23989	M9NF69;Q23989	-0.401611	-0.23282
1348	M9NFA7;Q9VX91	M9NFA7;Q9VX91	-0.268327	-0.248532
1349	M9NFF0;Q8SYF7;M9NDV5;Q5LJR0;Q5LJR2	M9NFF0;Q8SYF7;M9NDV5;Q5LJR0;Q5LJR2	2.25288	2.13295
1351	M9NFF8;P40793	M9NFF8;P40793	-0.14152	-0.0367851
1352	Q9W0R7;M9NFF9	Q9W0R7;M9NFF9	0.0895277	0.0988912
1353	M9NFH4;X2JEI9;E1JJS2;Q9VRA6	M9NFH4;X2JEI9;E1JJS2;Q9VRA6	0.446913	0.551149
1356	M9NFP7;P16914	M9NFP7;P16914	-0.963208	-0.899249
1357	M9NFR3;P14785	M9NFR3;P14785	0.469993	0.435405
1359	M9NG50;P46150	M9NG50;P46150	-0.276631	-0.226171
1360	M9NGE4	M9NGE4	0.00617721	-0.0272533
1361	Q9W2Y5;M9NGY4;M9NDT5;M9NF08	Q9W2Y5;M9NGY4;M9NDT5;M9NF08	0.0319357	0.081738
1363	M9NHD5;Q9VWD6	M9NHD5;Q9VWD6	-0.158534	-0.144482
1364	M9NHG0;X2JEJ3;P22814;Q0KHQ3;R9PY33;Q9VRA9;M9PI08;Q27J10	M9NHG0;X2JEJ3;P22814	-0.351593	-0.252593
1365	M9PAY6;M9PDS0;Q9VPM7	M9PAY6;M9PDS0;Q9VPM7	0.387747	0.365711
1366	Q9VQ16;M9PAZ8	Q9VQ16;M9PAZ8	-0.534378	-0.446087
1367	Q9VQ83;M9PB06	Q9VQ83;M9PB06	-0.588893	-0.477997
1368	M9PB07;Q95TS8	M9PB07;Q95TS8	0.340373	0.325714
1369	M9PB12;Q9VQC4	M9PB12;Q9VQC4	-0.0602059	0.0497472
1371	Q9VMU1;M9PB41;M9PEP4	Q9VMU1;M9PB41;M9PEP4	0.0421795	0.198033
1372	M9PB45;Q9VMM4	M9PB45;Q9VMM4	0.215505	0.182614
1373	M9PB57;P54350	M9PB57;P54350	0.510824	0.478069
1374	M9PB60;M9PCT2;Q9VM32;M9PF01;M9PCF0;M9PC92;Q9VM31;M9PC95;M9PB59;Q8IPI3	M9PB60;M9PCT2;Q9VM32;M9PF01;M9PCF0;M9PC92;Q9VM31;M9PC95;M9PB59;Q8IPI3	0.447392	0.298387
1375	M9PB68;Q9VLT5	M9PB68;Q9VLT5	0.056322	0.0706862
1376	M9PB84;P31009	M9PB84;P31009	-0.461447	-0.425248
1377	M9PB86;P23645	M9PB86;P23645	0.264512	0.313322
1378	M9PB90;Q9VKY2	M9PB90;Q9VKY2	-0.0440453	0.0194968
1379	M9PB92;M9PCL9;M9PFI0	M9PB92;M9PCL9;M9PFI0	-0.040217	0.0209484
1380	M9PB96;Q9VKQ3	M9PB96;Q9VKQ3	0.378808	0.367117
1381	M9PBA3	M9PBA3	0.421966	0.509226
1382	M9PBB5;P09052	M9PBB5;P09052	0.00105377	0.0389552
1384	M9PG66;M9PBD6;Q9VIZ0	M9PG66;M9PBD6;Q9VIZ0	-0.0233718	0.0803048
1385	M9PBD9;Q9VIW3	M9PBD9;Q9VIW3	0.107158	0.151901
1386	Q9VIV0;M9PBE1	Q9VIV0;M9PBE1	0.103032	0.158393
1387	Q8INW0;M9PBE2;Q9VIT1;Q8INV9	Q8INW0;M9PBE2;Q9VIT1;Q8INV9	-0.242099	-0.497924
1388	M9PBF6;Q1WWC9;Q9VIF7;M9PDC7;Q8INU2;M9ND00	M9PBF6;Q1WWC9;Q9VIF7;M9PDC7;Q8INU2;M9ND00	0.176881	0.12427
1389	M9PDH5;M9PBG6;Q9W0S9	M9PDH5;M9PBG6;Q9W0S9	0.263239	0.270684
1390	M9PBH7;P40792	M9PBH7;P40792	-0.304884	-0.27108
1391	M9PBH9;Q9W0E8	M9PBH9;Q9W0E8	0.527882	0.425918
1393	M9PBI5;P13395;M9PDQ0;M9PGV6	M9PBI5;P13395;M9PDQ0;M9PGV6	-0.01249	-0.0185821
1394	M9PBK1;Q6WV16	M9PBK1;Q6WV16	0.308685	0.516176
1395	M9PBK5;P08570	M9PBK5;P08570	-0.547498	-0.569777
1396	M9PBL3;P02828	M9PBL3;P02828	-0.275531	-0.244208
1397	M9PBM0;O18391	M9PBM0;O18391	0.0905938	0.2521
1398	M9PBM1;Q94535	M9PBM1;Q94535	0.562808	0.401664
1399	M9PBM3;Q9VPW2	M9PBM3;Q9VPW2	0.32205	0.404747
1400	M9PBM4;Q9VZL6	M9PBM4;Q9VZL6	-0.00638327	-0.103296
1401	Q8SXR1;M9PBN2	Q8SXR1;M9PBN2	-1.20129	-1.05112
1402	M9PBN7;P48603	M9PBN7;P48603	0.134107	0.161439
1403	M9PBP1;Q9VPT5	M9PBP1;Q9VPT5	2.0119	1.97695
1404	M9PBP5;Q9VQ57	M9PBP5;Q9VQ57	0.0750643	0.194528
1406	M9PEC8;M9PEN4;M9PBQ3;P37276	M9PEC8;M9PEN4;M9PBQ3;P37276	0.11698	0.120189
1407	M9PBQ4;Q9VQ79	M9PBQ4;Q9VQ79	-0.367514	-0.42086
1409	Q9VRR4;Q8I935;M9PBR6;Q8I934	Q9VRR4;Q8I935;M9PBR6;Q8I934	0.298591	0.524366
1410	Q9VS25;M9PBT2;M9PHM1;Q8IQ73	Q9VS25;M9PBT2;M9PHM1;Q8IQ73	-1.82989	-1.77804
1411	M9PBU2;P48554	M9PBU2;P48554	-0.90891	-0.912194
1412	M9PBU4;Q9VQG1	M9PBU4;Q9VQG1	-0.11081	-0.0604277
1413	Q9VQI8;M9PBV2;O76268;Q8IPZ6	Q9VQI8;M9PBV2;O76268	0.136383	0.201279
1414	M9PBV8;Q9VQB7	M9PBV8;Q9VQB7	0.0538397	0.0545357
1415	M9PBW0;Q9VSF3	M9PBW0;Q9VSF3	0.225625	0.159744
1416	M9PBX0;P42003	M9PBX0;P42003	-0.140817	-0.287884
1417	M9PBZ9;P48598	M9PBZ9;P48598	-0.0296587	-0.0182435
1418	M9PC65;Q8IPL3;M9PC10;M9PEM2;M9PB37	M9PC65;Q8IPL3;M9PC10;M9PEM2;M9PB37	0.227793	0.168285
1419	M9PC18;Q9VQN8	M9PC18;Q9VQN8	1.2529	1.44434
1420	M9PC25;Q9VPT4	M9PC25;Q9VPT4	0.553004	0.561014
1422	Q9VQ08;M9PC46	Q9VQ08;M9PC46	0.351849	0.262954
1423	Q0E8F8;M9PI07;M9PC64;Q8IQE9;M9PF47	Q0E8F8;M9PI07;M9PC64;Q8IQE9;M9PF47	-0.250844	-0.292585
1424	M9PC74;Q7K1W8	M9PC74;Q7K1W8	-0.40022	-0.206555
1425	M9PC85;Q9V3V0	M9PC85;Q9V3V0	0.471775	0.410929
1426	M9PC87;Q7K155	M9PC87;Q7K155	-0.359151	-0.419649
1427	M9PC89;P17133	M9PC89;P17133	0.173434	0.20699
1428	M9PC96;Q9VTU3;M9PEY9;F0JAN9	M9PC96;Q9VTU3;M9PEY9;F0JAN9	0.275469	0.333823
1429	Q9VQ94;M9PC99	Q9VQ94;M9PC99	0.166709	0.177661
1431	M9PCQ7;M9PCB8;M9PB51;M9PC63;A8DYW2;M9PCC2;Q9VMA9;M9PEV6	M9PCQ7;M9PCB8;M9PB51;M9PC63;A8DYW2;M9PCC2;Q9VMA9;M9PEV6	0.495722	0.503753
1432	M9PCC1;O18640;M9PB67	M9PCC1;O18640	-0.495813	-0.478084
1433	M9PCC3;P91641	M9PCC3;P91641	-0.220716	-0.0717128
1434	M9PCC6;Q9VMA0	M9PCC6;Q9VMA0	0.0750438	-0.0590335
1435	Q9VM93;M9PCR7;M9PCD4;M9PC73	Q9VM93;M9PCR7;M9PCD4;M9PC73	-0.214173	-0.384584
1436	M9PCE0;Q01604	M9PCE0;Q01604	-0.189797	-0.197325
1438	M9PCE8;Q9VLJ6	M9PCE8;Q9VLJ6	-0.0550758	-0.0616836
1439	M9PCF1;Q9VQH2	M9PCF1;Q9VQH2	0.0932223	-0.170023
1440	M9PCF6;Q9VQI9	M9PCF6;Q9VQI9	0.264758	0.326371
1441	M9PCF8;Q9VUC6	M9PCF8;Q9VUC6	0.143	0.171138
1442	M9PCH8;Q9VLU0	M9PCH8;Q9VLU0	0.167183	0.157698
1443	X2J9V7;Q8IPG6;M9PCI1	X2J9V7;Q8IPG6;M9PCI1	-0.867611	-1.02566
1444	M9PCI2;Q9V3U2	M9PCI2;Q9V3U2	0.527236	0.516591
1445	M9PCI5;Q9VLS1	M9PCI5;Q9VLS1	0.183792	0.325176
1446	M9PCI6;Q9VQW7	M9PCI6;Q9VQW7	0.0787819	0.0615036
1449	M9PCK7;Q9VLJ8	M9PCK7;Q9VLJ8	-0.067729	-0.217393
1450	M9PCL4;Q9VMV6	M9PCL4;Q9VMV6	0.832595	0.904857
1451	M9PCL5;Q9VKX4	M9PCL5;Q9VKX4	0.136398	0.0106708
1452	M9PCL6;P08761;Q7KUM8;M9PI66;Q7KUN2	M9PCL6;P08761;Q7KUM8;M9PI66	-0.124297	-0.0598389
1453	M9PCM2	M9PCM2	-0.226549	0.116837
1454	M9PCM4;P29052	M9PCM4;P29052	-0.0722174	-0.198862
1455	M9PCN6;P16554	M9PCN6;P16554	0.00820393	0.0450271
1456	M9PCP3;Q9VMK9	M9PCP3;Q9VMK9	1.04553	1.18086
1457	M9PCQ1;Q27597;Q8IPJ7	M9PCQ1;Q27597;Q8IPJ7	-0.123105	-0.0964935
1458	M9PCQ8;Q9XTN2	M9PCQ8;Q9XTN2	0.189719	0.302589
1459	M9PCR4;Q9VUY8	M9PCR4;Q9VUY8	-0.118599	0.150749
1460	M9PCV1;Q9VK27	M9PCV1;Q9VK27	0.81992	0.637194
1461	M9PCV9;Q9VVI9	M9PCV9;Q9VVI9	0.168717	0.255009
1462	Q8IPG9;M9PCW5;Q7KTJ7	Q8IPG9;M9PCW5;Q7KTJ7	-0.265797	-0.0821337
1463	M9PCX3;Q9VKI0;M9PFL9;M9PD87	M9PCX3;Q9VKI0;M9PFL9;M9PD87	0.116995	0.114529
1465	M9PD01;O44252	M9PD01;O44252	-0.6063	-0.830877
1466	Q86LC7;M9PD02;Q24180;M9PFP9;E8NH34	Q86LC7;M9PD02;Q24180;M9PFP9;E8NH34	0.340531	0.38579
1467	M9PFQ1;M9PD06;M9PG46;M9PFZ0	M9PFQ1;M9PD06;M9PG46;M9PFZ0	0.415735	0.523447
1468	M9PD08;Q9VK85	M9PD08;Q9VK85	-0.369817	-0.323065
1469	M9PD09;Q9VW56	M9PD09;Q9VW56	-0.428487	-0.402956
1470	Q9VK62;M9PD12	Q9VK62;M9PD12	-1.11289	-0.959367
1471	M9PD16;Q9NK54	M9PD16;Q9NK54	0.182439	0.206408
1472	M9PD18;P48602	M9PD18;P48602	-0.936829	-0.89543
1473	Q9VK35;M9PD23	Q9VK35;M9PD23	-0.971095	-1.09292
1474	M9PD27;Q9VPH7;M9PFR9	M9PD27;Q9VPH7;M9PFR9	0.110003	0.121142
1475	Q0E8R8;Q9VL56;M9PD30;M9NEX9;M9NCT0	Q0E8R8;Q9VL56;M9PD30;M9NEX9;M9NCT0	0.589472	0.387019
1476	M9PD33;Q9VK07	M9PD33;Q9VK07	1.76272	0.951013
1477	M9PD43;Q9V412	M9PD43;Q9V412	0.106023	0.0678432
1478	M9PD50;Q7KTX8;A8JNW4	M9PD50;Q7KTX8;A8JNW4	0.127681	0.274707
1479	M9PG27;M9PD54;Q9VP76;M9PID8;M9NG95	M9PG27;M9PD54;Q9VP76;M9PID8;M9NG95	0.576918	0.655927
1480	M9PDG3;M9PD57;P40798	M9PDG3;M9PD57;P40798	0.377384	0.531146
1483	M9PD73;M9PDF6;Q9VIT9;M9PDR0	M9PD73;M9PDF6;Q9VIT9;M9PDR0	-0.903631	-0.619498
1484	M9PD75;Q94920	M9PD75;Q94920	0.000295977	0.0662833
1485	M9PIH3;M9PD81;M9PGC5	M9PIH3;M9PD81;M9PGC5	0.100342	0.148619
1486	M9PD90;Q9VKG8;M9PCQ6	M9PD90;Q9VKG8;M9PCQ6	0.844264	0.7961
1487	M9PD95;Q03017	M9PD95;Q03017	0.686924	0.477189
1488	M9PDA6;Q9VIK9	M9PDA6;Q9VIK9	-0.56557	-0.472947
1489	M9PDB2;Q7KT16;Q2PDR9;Q9VIJ4	M9PDB2;Q7KT16;Q2PDR9;Q9VIJ4	-0.493796	-0.499459
1491	M9PDF5;Q9V3R6	M9PDF5;Q9V3R6	0.907735	0.764461
1493	M9PDI2;O97420	M9PDI2;O97420	-0.0438338	-0.226215
1494	M9PDI3;P09085	M9PDI3;P09085	-0.967536	-0.683863
1496	M9PDJ6;P49858	M9PDJ6;P49858	-0.368478	-0.205829
1497	M9PDK5;Q9V3J1	M9PDK5;Q9V3J1	-0.126116	-0.0904873
1498	M9PDL0	M9PDL0	1.29774	1.33437
1499	M9PDL9;P16568;M9PDB8;M9NDR2	M9PDL9;P16568;M9PDB8;M9NDR2	-0.072817	-0.0148043
1500	Q9W4X4;M9PDM4	Q9W4X4;M9PDM4	-0.709636	-0.527714
1501	M9PDM5;P25157	M9PDM5;P25157	-0.62024	-0.263996
1502	M9PDN9;P42271	M9PDN9;P42271	0.0117935	0.000460618
1503	M9PDP5;Q9W4R7;M9PGK9	M9PDP5;Q9W4R7;M9PGK9	-0.784996	-0.992964
1504	M9PDR2;Q9W0Q1	M9PDR2;Q9W0Q1	0.253606	0.158011
1505	M9PDS1;Q9W0M3	M9PDS1;Q9W0M3	-0.809499	-0.692094
1506	M9PDU4;Q94519	M9PDU4;Q94519	-0.450297	-0.26576
1507	Q8IRG9;Q8IRG8;M9PDV3;M9PE64;Q9W0E3	Q8IRG9;Q8IRG8;M9PDV3;M9PE64;Q9W0E3	-0.0978154	0.0587825
1510	M9PDY5;Q9VZT7;Q8SX64;M9PEG0;M9PE55	M9PDY5;Q9VZT7;Q8SX64;M9PEG0;M9PE55	-0.163816	-0.146456
1511	Q9W3M3;M9PDZ8;M9PGM3	Q9W3M3;M9PDZ8;M9PGM3	0.104667	0.0861166
1512	Q9XTK9;M9PE01;Q7KM04;Q7KM08;Q7KM03;Q7KM05	Q9XTK9;M9PE01;Q7KM04;Q7KM08;Q7KM03;Q7KM05	0.275032	0.408608
1513	M9PE14;Q9W021	M9PE14;Q9W021	0.218717	0.226484
1514	Q9W0N7;M9PE35	Q9W0N7;M9PE35	-0.441314	-0.254861
1515	M9PEA1;Q9VRQ5	M9PEA1;Q9VRQ5	0.764876	0.873925
1516	Q9VZ27;M9PEA2	Q9VZ27;M9PEA2	-0.232848	-0.195472
1517	M9PEA6;O76927	M9PEA6;O76927	-0.477183	-0.48077
1518	M9PEB8;Q9VRX6	M9PEB8;Q9VRX6	-0.337485	-0.179767
1519	M9PED1;Q9VZZ7	M9PED1;Q9VZZ7	0.170289	0.259912
1520	M9PEE8;Q8IQ13	M9PEE8;Q8IQ13	-0.299392	-0.295383
1521	M9PEF6;Q9VQX4;M9PC31	M9PEF6;Q9VQX4;M9PC31	0.949072	1.05993
1522	X2JJV1;M9PEF9;Q23977;M9PH06	X2JJV1;M9PEF9;Q23977;M9PH06	0.200494	0.342621
1523	Q7K3K5;M9PEG6	Q7K3K5;M9PEG6	-1.07223	-1.67035
1524	M9PEG8;Q8T0D4	M9PEG8;Q8T0D4	-0.505086	-0.447298
1525	M9PEH9;M9PHI3;Q9VYB7;A8JUV2	M9PEH9;M9PHI3;Q9VYB7;A8JUV2	-0.0269	-0.150495
1526	M9PEI9;Q9VY93	M9PEI9;Q9VY93	0.28809	0.284826
1528	M9PEJ9;M9PF10;Q9VSM4	M9PEJ9;M9PF10;Q9VSM4	0.433145	0.512994
1529	M9PEL1;Q07327	M9PEL1;Q07327	0.213858	0.163316
1530	M9PEL5;Q9VST7	M9PEL5;Q9VST7	-0.226706	-0.165951
1531	Q9VZC9;M9PEM1	Q9VZC9;M9PEM1	0.429962	0.659405
1532	M9PEN1;Q9VSY4	M9PEN1;Q9VSY4	1.32006	1.14055
1533	M9PES6;Q9VSL7	M9PES6;Q9VSL7	0.398146	0.251118
1534	M9PES8	M9PES8	0.370558	0.432261
1535	Q960V1;Q0E8G1;M9PET3;M9PF79	Q960V1;Q0E8G1;M9PET3;M9PF79	0.221111	0.166134
1536	M9PET7;Q9VTC2	M9PET7;Q9VTC2	0.109826	0.275448
1537	M9PEU5;Q9VTE9	M9PEU5;Q9VTE9	-0.020255	0.0330906
1538	M9PEV2;Q9VSS9	M9PEV2;Q9VSS9	1.84433	2.05384
1539	M9PEW1	M9PEW1	-0.354811	-0.320667
1540	M9PF36;M9PEX2;Q9VSZ1	M9PF36;M9PEX2;Q9VSZ1	-0.0724921	-0.0689011
1541	M9PEX3;P55965	M9PEX3;P55965	0.615349	0.200159
1542	R9PY73;Q9VX88;M9PEY4;M9PHX3;M9PHE3	R9PY73;Q9VX88;M9PEY4;M9PHX3;M9PHE3	0.039124	-0.0751461
1543	M9PEY6;Q9VM71;REV__X2JEI6;REV__Q9W3G7	M9PEY6;Q9VM71	0.206444	0.163632
1544	M9PEY7;M9PER1;M9PHS3;Q9VSF0	M9PEY7;M9PER1;M9PHS3;Q9VSF0	-0.630162	-0.528489
1545	M9PEZ2;Q9VM65	M9PEZ2;Q9VM65	-0.029703	-0.0440117
1546	M9PEZ4;Q9VTV1	M9PEZ4;Q9VTV1	-0.00659182	0.0346313
1547	M9PF14;M9PF20	M9PF14;M9PF20	0.0689604	0.0447056
1548	M9PF16;Q00963;M9PHG4	M9PF16;Q00963;M9PHG4	0.00860278	0.0192473
1549	M9PFG7;M9PF24;P46824	M9PFG7;M9PF24;P46824	0.0485609	0.187347
1550	M9PF40;Q9VTE5	M9PF40;Q9VTE5	-0.400051	-0.266681
1551	Q9VT32;M9PF46;Q9VT33;M9PEY1;M9PEP5;M9PHW7	Q9VT32;M9PF46;Q9VT33;M9PEY1;M9PEP5;M9PHW7	-0.229785	-0.275657
1553	M9PF60;O96395	M9PF60;O96395	0.567771	0.268975
1554	M9PF62;P48423	M9PF62;P48423	0.46403	0.389754
1556	M9PF96;Q9VWC8	M9PF96;Q9VWC8	0.260199	0.302734
1557	M9PFB5;Q94899	M9PFB5;Q94899	0.421288	0.367289
1558	M9PHQ1;M9PFD0;Q9VRG4	M9PHQ1;M9PFD0;Q9VRG4	0.61318	0.468103
1559	Q9VUW9;M9PFE4	Q9VUW9;M9PFE4	0.118374	0.010707
1560	M9PFF0;P41126	M9PFF0;P41126	-0.449334	-0.3609
1561	M9PFF6;Q9VTY4	M9PFF6;Q9VTY4	-0.193922	-0.213988
1563	Q9VUZ6;M9PFG1	Q9VUZ6;M9PFG1	-0.350835	-0.407838
1564	Q9VU51;M9PFH7	Q9VU51;M9PFH7	0.00757278	-0.135221
1565	M9PFK4;P22468	M9PFK4;P22468	-0.633386	-0.565984
1568	M9PFL2;Q24533;Q9VUD1;M9PFG6;Q9VUD3;M9PCG2	M9PFL2;Q24533;Q9VUD1;M9PFG6;Q9VUD3;M9PCG2	0.774345	0.881492
1569	M9PFL3;Q9VUU5	M9PFL3;Q9VUU5	-1.07322	-1.03574
1570	M9PFL6;P18537	M9PFL6;P18537	0.285484	0.254785
1571	M9PFM5;M9PFS6;P25439	M9PFM5;M9PFS6;P25439	0.168548	0.131002
1573	Q9VUX0;M9PFN0	Q9VUX0;M9PFN0	0.328177	0.41576
1574	M9PFN1;Q9V3K3	M9PFN1;Q9V3K3	-0.0882553	-0.0629989
1575	Q8SXD5;M9PFQ2;Q0E8R1	Q8SXD5;M9PFQ2;Q0E8R1	-1.02566	-1.05724
1576	Q9VV82;M9PFR8;Q9I7R5;M9PFW8	Q9VV82;M9PFR8;Q9I7R5;M9PFW8	0.087212	0.062912
1577	M9PFS8;Q9VVA0	M9PFS8;Q9VVA0	0.440354	0.511511
1578	M9PFT2;Q9VPB1	M9PFT2;Q9VPB1	-0.549328	-0.373974
1579	M9PFT8;Q9VUY0	M9PFT8;Q9VUY0	0.152576	0.045385
1580	M9PFT9;O96433;M9PI89	M9PFT9;O96433;M9PI89	0.75941	0.655912
1582	M9PFU7;Q9GYU7	M9PFU7;Q9GYU7	0.177229	0.19685
1583	M9PFV2;Q8SY34	M9PFV2;Q8SY34	0.711925	0.674307
1584	M9PFV9;P20232;Q9VXS6	M9PFV9;P20232	0.367047	0.28799
1585	M9PFW0;M9PG13;Q9VVW5	M9PFW0;M9PG13;Q9VVW5	0.724654	0.670696
1586	M9PFY1;Q9VJN5	M9PFY1;Q9VJN5	-0.177637	-0.0298043
1587	M9PFY2;Q9VVF4;Q8IQQ8	M9PFY2;Q9VVF4;Q8IQQ8	-0.287883	-0.435558
1588	M9PFZ1;Q9VNX6	M9PFZ1;Q9VNX6	0.113442	0.151257
1590	M9PIB5;Q9VPG7;M9PG08	M9PIB5;Q9VPG7;M9PG08	0.368194	0.319147
1591	M9PG22;P61209	M9PG22;P61209	0.228755	0.205249
1592	M9PG43;Q9NBK5	M9PG43;Q9NBK5	-0.282461	-0.189629
1593	M9PG47;P13008	M9PG47;P13008	-0.0435147	-0.0661
1594	M9PG50;Q9VP22	M9PG50;Q9VP22	0.437637	0.318129
1595	M9PG62;P25161	M9PG62;P25161	-0.0791746	-0.0358292
1596	M9PG69;Q9V422	M9PG69;Q9V422	-0.0854628	-0.111409
1597	M9PG70;O02194;B7Z090;M9PFS2	M9PG70;O02194;B7Z090;M9PFS2	0.765856	0.667248
1598	M9PG76;P19889	M9PG76;P19889	-0.269279	-0.204852
1599	M9PG81;M9PGM0;O76878	M9PG81;M9PGM0;O76878	-0.0689475	0.0773071
1601	Q7JUF8;M9PG98	Q7JUF8;M9PG98	1.09293	1.18373
1603	M9PGB7;M9PGU2;P18490	M9PGB7;M9PGU2;P18490	0.978456	1.00479
1604	M9PGB8;O76896	M9PGB8;O76896	1.15061	1.44403
1605	M9PGC9;Q8IPT2;Q9VP12;Q7KTV9	M9PGC9;Q8IPT2;Q9VP12;Q7KTV9	0.188178	0.183918
1606	M9PGD7;Q9W4R9	M9PGD7;Q9W4R9	-0.480418	-0.469252
1609	M9PGF7;O61307	M9PGF7;O61307	0.610259	0.667212
1610	M9PGG4;P18824	M9PGG4;P18824	0.045101	-0.0975056
1611	M9PGG7	M9PGG7	0.594594	0.657099
1612	M9PGG8;Q8T415	M9PGG8	-0.315012	-0.334417
1613	M9PGH6;Q9W484	M9PGH6;Q9W484	-0.187258	-0.148825
1614	Q95RU8;M9PGH7	Q95RU8;M9PGH7	1.309	1.28941
1615	M9PGI3;Q27884	M9PGI3;Q27884	0.12264	0.1751
1617	M9PGK3;Q9W3U8;M9PJA1;M9PGV3;M9PHA3;Q2MGP0	M9PGK3;Q9W3U8;M9PJA1;M9PGV3;M9PHA3	0.0288332	0.11571
1619	M9PGK7;Q7YU15;Q9W0Q4;A8JNH2;M9PBH0;X2J8G9;M9PDJ0;X2JAH4;A8JNH1	M9PGK7;Q7YU15;Q9W0Q4;A8JNH2	0.116732	0.352342
1620	M9PGL2;Q95RC0	M9PGL2;Q95RC0	-0.0741233	-0.0663557
1621	M9PGL7;Q9U4L6	M9PGL7;Q9U4L6	-0.382083	-0.351734
1622	M9PJ04;Q2PE29;M9PGL8;Q7KVX6	M9PJ04;Q2PE29;M9PGL8;Q7KVX6	0.101132	0.0593962
1624	M9PGZ9;M9PGN9;P22810	M9PGZ9;M9PGN9;P22810	1.43341	1.38664
1625	M9PGP7;Q9W4E8	M9PGP7;Q9W4E8	0.104637	-0.0366832
1626	M9PGQ6;P39736	M9PGQ6;P39736	0.368421	0.318574
1627	M9PGS2;P20153	M9PGS2;P20153	1.69594	1.81404
1628	M9PGT9;Q24040	M9PGT9;Q24040	-1.02821	-0.852121
1629	M9PGW8;Q8IR86;M9PHL6;Q9VYV8;M9PHA0	M9PGW8;Q8IR86;M9PHL6;Q9VYV8;M9PHA0	0.168088	0.0788381
1630	M9PGX7;Q9W058	M9PGX7;Q9W058	0.192615	0.258173
1631	M9PH10;P46461	M9PH10;P46461	0.702866	0.8971
1632	M9PH13;Q9VYF2	M9PH13;Q9VYF2	-0.112347	-0.0304919
1633	M9PH27;Q9GNL3	M9PH27;Q9GNL3	-0.401158	-0.43232
1635	M9PH44;P82295;M9PDX6;M9PBK6	M9PH44;P82295;M9PDX6;M9PBK6	-0.150033	-0.0417574
1636	M9PH59;Q9VXX8	M9PH59;Q9VXX8	-0.384344	-0.304841
1638	M9PH73;Q24025	M9PH73;Q24025	0.190668	0.188351
1639	M9PH85;Q9Y0Y7	M9PH85;Q9Y0Y7	0.237572	0.301724
1641	M9PHD6;Q9VX97	M9PHD6;Q9VX97	-0.00372802	0.0625978
1642	Q8T052;M9PHD8;Q07DP5	Q8T052;M9PHD8;Q07DP5	0.333679	0.0287421
1644	M9PHG0;M9PHY4;M9PHV3;M9PJQ3	M9PHG0;M9PHY4;M9PHV3;M9PJQ3	0.653679	0.772486
1645	Q9VRQ1;M9PHI7	Q9VRQ1;M9PHI7	0.293441	0.174792
1647	M9PHK2;Q0KHQ5;Q8IQW6;M9NE33;M9PI11	M9PHK2;Q0KHQ5;Q8IQW6	-0.472196	-0.664422
1648	M9PHL0;M9PHZ0;M9PI16;Q9VWF2	M9PHL0;M9PHZ0;M9PI16;Q9VWF2	0.276081	0.195567
1649	M9PHM6;Q9VS34	M9PHM6;Q9VS34	-0.678577	-0.662336
1650	M9PHN1;Q24175	M9PHN1;Q24175	0.0819756	0.101724
1651	Q9VXE7;M9PHS8	Q9VXE7;M9PHS8	0.299947	0.435048
1653	M9PHU7;M9PEU6;M9PBY3;M9PEK7;M9PF18	M9PHU7;M9PEU6;M9PBY3;M9PEK7;M9PF18	0.151162	0.118121
1654	M9PHV1;P40427	M9PHV1;P40427	0.262439	0.286871
1655	Q8IR21;M9PHV4	Q8IR21;M9PHV4	-0.277311	-0.185581
1659	M9PHY0;Q9VWK7	M9PHY0;Q9VWK7	0.00729613	-0.020759
1660	Q9VWZ1;M9PHZ1	Q9VWZ1;M9PHZ1	0.66514	0.514247
1661	M9PI05;Q9V3I5	M9PI05;Q9V3I5	-0.453595	-0.519847
1662	M9PI17;Q8IQF8	M9PI17;Q8IQF8	-0.386569	-0.30834
1663	M9PI18;Q9VRF7;M9PHP6	M9PI18;Q9VRF7;M9PHP6	0.600533	0.645078
1664	Q9VTY8;M9PI41	Q9VTY8;M9PI41	-0.095793	-0.126402
1666	M9PI74;Q24306	M9PI74;Q24306	0.0474299	0.129812
1667	M9PI82;P91891	M9PI82;P91891	-0.153371	-0.165264
1668	X2JD11;M9PI87;Q9VVF8	X2JD11;M9PI87;Q9VVF8	0.133895	0.257529
1669	M9PI95;Q9VVT5	M9PI95;Q9VVT5	0.0811389	-0.0266841
1670	Q9VVV6;M9PI96;Q9VVV5;Q86BJ0;Q86BI9	Q9VVV6;M9PI96;Q9VVV5;Q86BJ0;Q86BI9	0.0413372	-0.0264419
1671	M9PIC3;Q9VPD3	M9PIC3;Q9VPD3	-0.500486	-0.60873
1672	Q9VPB2;M9PIC9	Q9VPB2;M9PIC9	0.830726	0.871653
1674	M9PIG8;P55035	M9PIG8;P55035	0.183148	0.159099
1675	M9PIM0;O61231	M9PIM0;O61231	-0.30134	-0.330071
1676	M9PIS3;P41572	M9PIS3;P41572	-0.0769689	-0.120951
1677	Q7YU84;M9PIU6;P09956	Q7YU84;M9PIU6;P09956	0.0661669	0.0751513
1678	M9PJC7;P13709;M9PE02;E1JJJ8;M9PGM8	M9PJC7;P13709;M9PE02;E1JJJ8;M9PGM8	-0.103655	-0.227063
1679	M9PJE8;Q24337	M9PJE8;Q24337	-0.208049	-0.238075
1680	Q86NK9;M9PJN5;M9NGF7;Q8IR38;Q8IR37;M9NEH6;Q9XYX1	Q86NK9;M9PJN5;M9NGF7;Q8IR38;Q8IR37;M9NEH6;Q9XYX1	0.165764	0.0920516
1681	M9PJN8;P07487;Q7JY07	M9PJN8;P07487	-0.894797	-0.853356
1682	M9PJP0;Q9VXK0	M9PJP0;Q9VXK0	0.192457	0.215482
1683	X2JDA8;M9W963;P22293	X2JDA8;M9W963;P22293	0.249213	0.331195
1684	N0D8I3;Q9W420	N0D8I3;Q9W420	-0.0522656	-0.0349148
1685	O01382	O01382	0.303992	0.312456
1686	O01666	O01666	-0.543456	-0.539495
1687	X2JG23;O01939	X2JG23;O01939	-0.271433	-0.40561
1688	O02002	O02002	-0.00987012	-0.103898
1689	O02193	O02193	-0.10785	-0.126616
1690	O02195	O02195	-0.115136	-0.16219
1691	O02373	O02373	-0.0250795	0.128992
1692	O02649;Q9VMN5	O02649	-0.278542	-0.281535
1693	O15971	O15971	-0.707109	-0.471509
1694	O16043	O16043	-0.445388	-0.217196
1695	O16102	O16102	-0.586003	-0.59078
1696	O16129	O16129	0.171616	0.233076
1697	O16130	O16130	-0.946041	-1.47982
1698	O16797	O16797	-0.529469	-0.487778
1699	O16810	O16810	-0.0528947	-0.166917
1701	O17432	O17432	0.568594	0.652333
1702	O17468	O17468	0.0818234	0.19899
1703	O18332	O18332	-0.354195	-0.25541
1704	O18333	O18333	-0.195078	-0.271768
1705	X2J5T3;O18334	X2J5T3;O18334	0.313054	0.450119
1706	O18335	O18335	-0.0537984	-0.033976
1707	O18336;Q86BK8	O18336;Q86BK8	-0.346772	-0.277828
1708	O18338;M9NEE8	O18338;M9NEE8	-0.0757917	0.0611909
1710	O18353;Q7KVG9	O18353;Q7KVG9	0.370404	0.423434
1711	O18373	O18373	-0.364193	-0.437169
1712	O18399	O18399	-0.200699	-0.283436
1713	O18404;D5A7S2	O18404	-0.459838	-0.594157
1714	O18405	O18405	-0.864814	-0.816115
1715	O18413	O18413	0.0328716	0.0692687
1716	O18475	O18475	0.12169	0.324173
1717	O18645	O18645	-0.103165	-0.125192
1718	O44226	O44226	0.117638	0.103295
1720	O44424	O44424	0.335403	0.309799
1721	O44434	O44434	0.247827	0.263206
1722	O44437	O44437	0.211465	0.159511
1723	X2JAB9;O46037	X2JAB9;O46037	0.442668	0.45462
1724	O46043	O46043	-0.0804929	-0.0959037
1725	Q7KW02;O46048;X2JDX3	Q7KW02;O46048;X2JDX3	0.381894	0.401962
1726	O46050	O46050	-0.651854	-0.646623
1727	O46067	O46067	0.390161	0.479324
1728	X2JCE0;O46072	X2JCE0;O46072	-0.21298	-0.0625704
1729	O46079	O46079	0.183606	0.135996
1730	O46080	O46080	0.967636	0.817797
1731	O46084	O46084	-0.302117	-0.299596
1732	Q7KW08;O46085	Q7KW08;O46085	0.208461	0.236726
1733	O46089;X2JA69	O46089;X2JA69	0.231549	0.260558
1734	O46094	O46094	-0.359236	-0.465437
1735	O46098	O46098	0.413169	0.49075
1736	O46100;M9PDG9	O46100;M9PDG9	0.0667776	-0.0731937
1737	O46102;Q7KW16	O46102	0.872655	0.720193
1738	O46106	O46106	0.0669384	0.0290687
1739	O46307	O46307	0.216477	0.287673
1740	O46308	O46308	0.241842	0.102473
1741	O46339	O46339	0.0174285	-0.0458015
1742	O46342;A0A0B4K691;Q9VS73	O46342;A0A0B4K691	-0.0133992	-0.003793
1743	O61305;L7EGI4	O61305;L7EGI4	0.1599	0.224731
1744	O61345	O61345	-0.0208484	0.0094706
1745	O61380;A8DZ29	O61380;A8DZ29	0.104648	0.144021
1746	O61443	O61443	-0.0564487	0.0172482
1747	O61444	O61444	0.50337	0.445901
1748	O61491	O61491	-0.442128	-0.214176
1749	O61604;Q8IQZ8;Q8IQZ7	O61604;Q8IQZ8;Q8IQZ7	0.202598	0.238017
1750	O61613	O61613	0.0429144	0.0446978
1751	O61661;Q59DY7	O61661;Q59DY7	-0.196388	-0.234558
1752	O61722	O61722	0.0350307	0.0130518
1753	O62526	O62526	1.54228	1.77286
1754	O62530	O62530	-0.475416	-0.400936
1755	O62531	O62531	-0.0309753	0.0139116
1756	O62602	O62602	0.149979	0.141132
1757	O62609;Q8IMG6	O62609;Q8IMG6	0.151704	0.0608087
1758	O62619	O62619	-0.390734	-0.319275
1759	O62621	O62621	-0.0476984	0.0524009
1760	O76454	O76454	0.0762748	0.143544
1761	O76460	O76460	-0.185844	0.0832287
1762	O76462	O76462	0.211127	0.103219
1763	O76464	O76464	-0.0831686	-0.166385
1764	Q541C9;O76511	Q541C9;O76511	-0.00667564	-0.163422
1765	O76513	O76513	-0.139096	0.00871435
1766	O76521	O76521	0.00299129	-0.0648241
1767	O76742	O76742	-0.404056	-0.328006
1768	O76752	O76752	-0.130804	-0.17913
1769	O76767	O76767	-0.451733	-0.419856
1770	O76857	O76857	-0.167069	-0.0157798
1771	O76861	O76861	0.360452	0.148107
1772	O76863	O76863	0.0666956	0.0872322
1773	Q9W4W6;O76865	Q9W4W6;O76865	-0.186658	0.0101685
1774	Q8IH14;O76876;X2JA35	Q8IH14;O76876	-0.197591	-0.0984574
1775	O76877	O76877	0.580466	0.494879
1777	O76902	O76902	-0.0385094	-0.0303601
1778	O76904	O76904	-0.0197819	-0.116886
1779	O76906	O76906	0.358712	0.380798
1780	O76912	O76912	0.378079	0.495332
1781	O76922	O76922	-0.139472	-0.130246
1782	O76924	O76924	0.247226	0.278481
1783	O76928	O76928	-0.270076	-0.357834
1784	X2JG90;O76932	X2JG90;O76932	0.216128	0.117719
1785	O76994	O76994	-0.944982	-0.855574
1786	X2J9B3;O77051	X2J9B3;O77051	1.13449	1.03791
1787	O77134;Q9VQT0	O77134	0.0603988	0.0788455
1788	O77259;Q7YZA5	O77259;Q7YZA5	0.0879444	0.103727
1789	Q9W5E6;O77260	Q9W5E6;O77260	-0.587772	-0.573239
1790	O77263	O77263	0.38055	0.231903
1791	X2JI07;O77264	X2JI07;O77264	-0.512299	-0.584529
1792	O77266;Q960D4	O77266;Q960D4	-0.181394	-0.243363
1793	O77283;Q1W9Q0;Q1W9P9	O77283;Q1W9Q0;Q1W9P9	0.0679009	0.0728739
1794	O77410	O77410	-0.195498	-0.178919
1795	O77425	O77425	0.104163	0.185035
1796	O77430;Q9VWC3	O77430	-0.312262	-0.219228
1797	O77434;M9PGI6	O77434;M9PGI6	0.0830443	0.157967
1798	O77460	O77460	-0.110391	-0.0862036
1799	O77477	O77477	0.358783	0.305904
1800	O96067	O96067	-0.237982	-0.21642
1801	O96299;O97479	O96299	-0.846558	-0.528082
1802	O96532	O96532	-0.108464	-0.232265
1803	O96539	O96539	0.0873791	-0.290153
1804	O96553;A0A0B4K623	O96553;A0A0B4K623	-0.284118	-0.423127
1805	O96607;Q0E8S7;Q9VM94;M9PB54;M9PEX1	O96607;Q0E8S7;Q9VM94;M9PB54;M9PEX1	-0.283496	-0.393344
1806	X2JEB4;O96651	X2JEB4;O96651	-0.12675	-0.165768
1807	O96660	O96660	-0.0687588	-0.0169079
1808	O96689;A0A021WW32	O96689;A0A021WW32	-0.0124248	-0.0766362
1809	O96692;A0A0B4LGJ4	O96692;A0A0B4LGJ4	0.285463	0.204306
1810	O96824	O96824	-0.133662	-0.0781788
1811	O96838	O96838	0.000374942	0.130157
1812	O96880	O96880	-0.0757736	-0.224344
1813	O96881	O96881	-0.370642	-0.299918
1814	O96989	O96989	-0.183679	-0.313257
1815	O97066	O97066	0.177988	0.238015
1816	O97102	O97102	0.0410456	0.0829454
1817	O97111	O97111	-0.267455	-0.222373
1818	O97125	O97125	-2.05787	-1.67354
1819	O97132	O97132	-0.258899	-0.314408
1820	O97182	O97182	0.0438614	-0.0904567
1821	O97183	O97183	-0.0795001	-0.119622
1822	O97418	O97418	-0.207027	-0.214327
1823	O97422	O97422	0.0436813	0.0189278
1824	O97428;Q8IRS7	O97428;Q8IRS7	-0.318278	-0.29372
1825	O97454	O97454	0.200573	0.111831
1826	O97477	O97477	0.000106121	-0.0315549
1827	P00334	P00334	-0.493754	-0.483441
1828	P00399	P00399	0.601934	0.58833
1829	P00408	P00408	-1.31941	-1.5001
1830	P00417	P00417	1.20737	1.15817
1831	P00967;Q59DZ6	P00967	-0.088677	-0.126046
1832	Q4AB54;P02255;Q4AB94;Q4ABD8	Q4AB54;P02255;Q4AB94;Q4ABD8	0.343891	0.279949
1833	P02283	P02283	-0.172552	-0.163779
1834	P02299	P02299	0.258992	0.274082
1836	X2JGG6;P02517	X2JGG6;P02517	-0.23387	-0.153457
1837	X2JC82;P02518	X2JC82;P02518	-0.249739	-0.268277
1838	P02572	P02572	-0.641401	-0.715901
1839	P82910;P02825;Q9VG58;Q9BIS2;Q9BIR7;Q8INI8	P82910;P02825;Q9VG58;Q9BIS2;Q9BIR7;Q8INI8	-0.147928	-0.139984
1840	P02835;Q7KSY7;Q7KSY6;Q7KSY5;A4V2I6;A4V2I1;P02833;P09077	P02835	0.493803	0.467965
1841	X2JD55;P02843	X2JD55;P02843	-0.331087	-0.344941
1842	X2JB25;P02844	X2JB25;P02844	-0.431607	-0.424866
1843	P04052	P04052	0.0065909	-0.0510419
1844	Q53YG3;P04197	Q53YG3;P04197	0.797169	0.893353
1845	P04359	P04359	0.124759	0.0579061
1846	P04388	P04388	-0.159902	0.000298967
1847	Q8MLW0;P04412	Q8MLW0;P04412	0.773335	0.573691
1848	P05084	P05084	-0.18991	0.113245
1849	P05205	P05205	-0.293884	-0.276832
1850	P05389	P05389	-0.457167	-0.611779
1851	P05552;A0A0B4KEJ0	P05552;A0A0B4KEJ0	-1.0546	-1.08697
1852	X2JFG0;P05990	X2JFG0;P05990	0.369185	0.339003
1853	P06601	P06601	0.720635	0.6528
1854	P06602	P06602	0.845665	0.27664
1855	P06605;P06603;P06604	P06605;P06603;P06604	-0.289549	-0.303444
1856	P06606	P06606	-0.321906	-0.295044
1857	X2JEX8;P06607;Q4V566;Q9VPH3;M9NFL7	X2JEX8;P06607	-0.378944	-0.357113
1858	P07182	P07182	-0.0166667	-0.243071
1860	P07185	P07185	0.860662	1.03313
1862	P07486	P07486	-0.219089	-0.233369
1863	P07664	P07664	-0.190029	-0.253524
1865	P08630	P08630	-0.124953	-0.197588
1866	P08646	P08646	-0.406185	-0.22283
1867	P09081	P09081	0.907127	0.90794
1869	P09180	P09180	-0.496098	-0.465028
1870	P0C919	P0C919	-0.116107	-0.102014
1871	P0DKM0	P0DKM0	0.30384	0.370393
1873	P10351	P10351	0.821133	0.971812
1874	X2JGX8;P10734;P15370	X2JGX8;P10734	-0.75662	-0.548245
1875	X2JCP8;P10987	X2JCP8;P10987	-0.408677	-0.443694
1876	P11046	P11046	0.441024	0.482738
1878	P11346	P11346	-0.167521	-0.192845
1879	P11455;Q9VVQ2	P11455;Q9VVQ2	-0.0539378	-0.0462833
1880	X2JAU0;P11584;X2JE30	X2JAU0;P11584;X2JE30	-0.169784	-0.135048
1882	X2J8F5;P11996	X2J8F5;P11996	-0.70213	-0.971686
1883	P11997	P11997	-0.632326	-0.509759
1884	P12297;M9MS02	P12297;M9MS02	0.345365	0.371617
1885	P12370	P12370	0.401817	0.388106
1886	X2J8L3;P12426	X2J8L3;P12426	-0.0928329	0.0306544
1887	P12646	P12646	-0.213922	-0.335095
1888	P12982	P12982	0.351373	0.350068
1889	P13060	P13060	-0.200712	-0.165481
1890	P13468	P13468	-0.330047	-0.229832
1891	P13496	P13496	-0.0540415	-0.0751359
1892	P13582	P13582	0.0767824	0.0284233
1893	P13607;E1JIR4;A0A0B4KGG8	P13607;E1JIR4;A0A0B4KGG8	-0.304084	-0.308598
1894	P14199	P14199	0.271694	0.228372
1895	P15007;E1JHR5	P15007;E1JHR5	-0.221077	-0.199262
1896	X2JAW6;P15215	X2JAW6;P15215	0.319997	0.181785
1897	P15348	P15348	-0.196843	-0.164052
1898	P15357;Q9W418;A4V1F9;P0CG69;R9PY16	P15357;Q9W418;A4V1F9;P0CG69;R9PY16	-0.331146	-0.323034
1899	P15619	P15619	-0.279927	-0.259611
1900	P16378;D5AEN0	P16378	0.0574972	0.172873
1901	P16620	P16620	-0.0930883	-0.118223
1902	P16912	P16912	-0.573027	-0.231785
1903	P17210	P17210	-0.109378	-0.0618687
1904	P17336;Q9VLI6	P17336	0.2323	0.126342
1905	P17704	P17704	-0.0637148	-0.119944
1906	P17719	P17719	0.520594	0.625836
1907	P17886	P17886	0.0175931	-0.110919
1908	P17917	P17917	-0.226631	-0.164383
1909	P18053;Q9VA12	P18053	-0.250808	-0.100782
1911	Q7JYK1;P18101	Q7JYK1;P18101	-0.611782	-1.06538
1913	P18171;M9NG31	P18171;M9NG31	0.0971633	-0.152621
1914	P18475	P18475	0.226937	0.116855
1915	P18502	P18502	0.210146	0.0629724
1916	P18929	P18929	-0.901227	-0.87736
1917	P18930	P18930	-0.342321	-0.520692
1918	P18932	P18932	0.300607	0.360929
1919	P18935	P18935	-0.740014	-0.796177
1921	P19109	P19109	-0.273286	-0.266661
1922	P19339;M9PHB3	P19339;M9PHB3	0.607593	0.636235
1923	P19538;H9XVL7;H9XVL6;A0A0B4KEP0;A0A0B4KGM2;Q962I0;Q7K0S9	P19538;H9XVL7	0.561191	0.540488
1924	P20007	P20007	-0.693621	-0.597764
1925	P20028	P20028	-0.0843071	-0.0503649
1926	P20193;E1JIJ9	P20193;E1JIJ9	0.356325	0.305701
1927	P20227	P20227	-0.743125	-0.651886
1928	P20240	P20240	0.280846	0.259454
1929	P20348	P20348	-0.569204	-0.728115
1930	P20353	P20353	-0.14452	-0.162003
1931	P20432	P20432	-1.05444	-1.16412
1932	P20439	P20439	0.134676	-0.0272792
1934	P21187	P21187	0.227877	0.190214
1935	X2JB60;P21461	X2JB60;P21461	-0.249524	0.0087888
1936	P21520	P21520	-0.292231	-0.456182
1937	P21914;Q9VWN3	P21914	-0.0107155	-0.00561654
1938	P22465	P22465	-0.0458342	-0.082686
1939	P22469	P22469	0.438863	0.486147
1940	P22700;A0A0B4LGB7	P22700;A0A0B4LGB7	-0.277356	-0.202997
1942	P22769	P22769	-0.0262731	0.00471825
1944	P22812	P22812	0.570633	0.512102
1945	Q4H2F8;Q4H2F9;Q4H2F7;P22813	Q4H2F8;Q4H2F9;Q4H2F7;P22813	0.287821	0.342299
1946	P22817	P22817	0.227858	0.233779
1947	P22977	P22977	-1.49569	-1.51212
1948	P23128	P23128	-0.34605	-0.278604
1949	Q8IMF5;P23226	Q8IMF5;P23226	-0.210783	-0.29081
1950	P23257	P23257	-0.0951511	-0.212174
1951	P23380;Q8IQG3	P23380	0.048733	0.0894773
1952	P23572	P23572	-0.0584721	-0.0506136
1953	P23625	P23625	0.0424533	-0.0969152
1954	P23647	P23647	-0.0341203	-0.0737998
1955	X2JDI1;P23696	X2JDI1;P23696	0.10739	0.0567586
1956	P23779	P23779	-0.0882836	-0.227511
1958	P24785	P24785	0.269354	0.276328
1959	P25007;Q7K2I4	P25007	-0.560081	-0.544182
1960	P25008	P25008	0.2557	0.357794
1961	P25028	P25028	1.67371	1.97039
1962	P25158;A0A126GUR4	P25158	0.532339	0.494852
1963	P25160	P25160	-0.180167	0.10334
1964	P25167	P25167	-0.196195	-0.0371636
1965	P25171	P25171	-0.215835	-0.197314
1966	P25455	P25455	0.684271	0.72132
1968	P25723	P25723	-0.234917	-0.164366
1969	P25823;A0A0B4LG05	P25823;A0A0B4LG05	-0.0184387	0.116642
1970	P25991	P25991	0.128522	0.125271
1971	P25992;A0A0B4KHA1	P25992;A0A0B4KHA1	0.550023	0.638139
1973	P26019	P26019	-0.0479514	-0.0587833
1974	P26675	P26675	-0.388279	-0.227903
1975	P26802	P26802	-0.236596	-0.0606689
1976	X2JAI1;P28159	X2JAI1;P28159	-0.274815	-0.172919
1977	X2JL29;P28466	X2JL29;P28466	0.816355	1.02562
1978	P28518	P28518	0.00565779	0.17524
1979	P28668	P28668	-0.211504	-0.153896
1980	P29327	P29327	-0.574927	-0.610748
1981	P29349;M9PGI1	P29349;M9PGI1	0.0172801	0.0774642
1982	Q53YH3;P29413	Q53YH3;P29413	-0.189689	-0.080919
1983	P29613	P29613	-0.444035	-0.471432
1985	X2JC31;P29742	X2JC31;P29742	-0.0582646	0.000498092
1986	P29746	P29746	-0.218517	-0.192636
1987	P29843;Q8I0E9	P29843;Q8I0E9	-2.92656	-2.68657
1989	P32027	P32027	1.80847	2.16033
1990	X2J5G6;P32100	X2J5G6;P32100	-0.468558	-0.488321
1991	P32234;REV__Q27591;REV__A0A0S0WGT1	P32234	-0.0596994	-0.0197043
1992	P32392	P32392	0.150023	0.146726
1993	P32748	P32748	-0.29035	-0.268915
1994	P32845	P32845	0.804632	0.78406
1995	P33244;M9NFK2;A0A0S0WH29	P33244;M9NFK2;A0A0S0WH29	0.590299	0.648839
1996	P34739	P34739	0.195438	0.119577
1997	P35220;X2JBG9	P35220	0.270748	0.168324
1998	P35381	P35381	-0.566859	-0.584999
1999	P35421	P35421	-0.0372198	-0.0422435
2000	P35600	P35600	-0.0101004	-0.00892896
2001	P35875	P35875	-0.148887	-0.152092
2002	P35992	P35992	-0.132401	-0.212827
2003	P36241	P36241	-0.272085	-0.302823
2004	P36951	P36951	-0.376854	-0.403476
2005	P38040	P38040	-0.142584	-0.247363
2006	P39205	P39205	0.109401	0.0980859
2007	P39572	P39572	0.00416727	-0.169335
2008	P39768	P39768	-0.135624	-0.148317
2009	P39769;Q5U0W8	P39769;Q5U0W8	-0.169139	0.0184483
2010	X2JA59;P39770	X2JA59;P39770	0.670082	-0.196363
2011	P40301	P40301	-0.389617	-0.28594
2012	P40304	P40304	-0.0577298	-0.113026
2013	P40320	P40320	0.224618	0.129228
2014	P40417;A8Y4W5	P40417	-0.0568216	-0.00687589
2015	P40688	P40688	0.654632	0.581241
2016	P40794	P40794	0.343217	0.423108
2017	P40796	P40796	-0.0354679	-0.000828395
2018	P40797	P40797	-0.331896	-0.258628
2019	P40946	P40946	-0.291771	-0.245737
2020	X2JGM9;P41042	X2JGM9;P41042	-0.463826	-0.50001
2021	P41073	P41073	-0.267053	-0.316512
2022	P41093	P41093	-0.546439	-0.425268
2023	P41094	P41094	-0.283956	-0.202895
2024	X2JFR6;P41374	X2JFR6;P41374	-0.411353	-0.39057
2025	P41375	P41375	-0.0261167	-0.0317424
2026	P41900	P41900	-0.0309873	0.0201795
2027	P41964;Q9VZQ4	P41964	2.51209	0.883113
2028	P42124;M9PHZ5	P42124;M9PHZ5	-0.0040979	0.172513
2029	P42207	P42207	0.22383	0.0848999
2030	P42283;A0A0B4KEI4;P42284;Q7KQZ4	P42283;A0A0B4KEI4	0.185117	0.00232487
2032	P42325	P42325	-0.476008	-0.376347
2033	P42570	P42570	0.320759	0.0703059
2034	P43332	P43332	-0.0822434	-0.157821
2035	P45437	P45437	-0.190043	-0.149337
2036	P45594	P45594	-0.40245	-0.356577
2037	P45888	P45888	-0.038983	-0.0528064
2038	P45889	P45889	-0.173122	-0.148585
2039	P45890	P45890	-0.290923	-0.22699
2040	P45975	P45975	-0.473932	-0.485902
2041	X2JCS6;P46223	X2JCS6;P46223	-0.532337	-0.459641
2042	P46415	P46415	0.211319	0.355355
2043	P46863	P46863	-0.0982241	-0.106029
2044	X2JDR5;P47938	X2JDR5;P47938	-0.312561	-0.339452
2045	P48148	P48148	-0.155102	-0.104866
2046	P48159	P48159	-0.215254	-0.256309
2047	P48375	P48375	-0.0882241	-0.0687173
2048	P48555	P48555	0.267625	0.360401
2049	P48588	P48588	-0.402057	-0.524866
2050	P48591	P48591	-0.0356396	-0.0399301
2051	P48592	P48592	0.392709	0.419464
2052	P48604	P48604	-0.126852	-0.0655344
2053	P48607;A1Z0H7	P48607;A1Z0H7	1.29685	1.20431
2054	P48609	P48609	0.0586572	0.0631458
2055	P48611	P48611	-0.543835	-0.527717
2056	P48612	P48612	0.908649	0.88827
2058	P49028	P49028	0.434004	0.338496
2059	X2JC35;P49630	X2JC35;P49630	-0.280886	-0.299249
2060	P49657;X2JFM3;Q9VX06	P49657;X2JFM3;Q9VX06	0.247081	0.149107
2061	P49735	P49735	-0.245141	-0.330503
2062	P49846	P49846	0.374468	0.291252
2063	P49847;M9PG32	P49847;M9PG32	0.243106	0.271024
2064	P49906	P49906	0.421085	0.452176
2065	P49963	P49963	0.14442	0.109608
2066	X2J6S0;P50535	X2J6S0;P50535	1.25714	1.25539
2067	P50536	P50536	0.0913141	0.227572
2068	X2JDU0;P50882	X2JDU0;P50882	-0.569381	-0.579902
2069	P50887	P50887	-0.218028	-0.166938
2070	P51140	P51140	0.282716	0.321957
2071	P51406	P51406	0.590855	0.659477
2072	P52029	P52029	-0.344689	-0.332328
2073	P52034;A0A0B4K7L1;A0A0B4KFI7	P52034;A0A0B4K7L1;A0A0B4KFI7	-0.260125	-0.330149
2074	P52295	P52295	-0.0546022	-0.0346087
2075	P52304	P52304	0.165009	0.144711
2076	Q541C3;P52485	Q541C3;P52485	0.00419867	-0.150641
2077	X2JAX3;P52486	X2JAX3;P52486	0.164574	0.172089
2079	P52654	P52654	0.563226	0.461274
2080	P52656	P52656	0.825397	0.878204
2081	P53034	P53034	0.136193	0.204791
2082	P53501	P53501	-1.24006	-1.1811
2083	P53624;Q8IRL4	P53624;Q8IRL4	0.0352498	0.131976
2084	P53997	P53997	0.0960025	0.146054
2085	P54352;X2JFQ7	P54352	-0.00462336	0.0326154
2086	P54353	P54353	0.0591953	-0.0516394
2087	P54356	P54356	0.718411	0.777111
2088	P54357;M9NEW1	P54357;M9NEW1	0.081747	-0.0109739
2089	P54358	P54358	0.0707569	0.0276191
2090	P54359;A0A0B4KGJ1	P54359;A0A0B4KGJ1	-0.241037	-0.21855
2091	P54362	P54362	0.141396	0.115752
2092	P54385;Q8IMY1	P54385;Q8IMY1	-0.39533	-0.435744
2093	P54397	P54397	-0.274268	-0.32106
2095	X2JGP4;P54399	X2JGP4;P54399	0.170329	0.247773
2096	P54622	P54622	0.0297255	0.103378
2097	X2JB15;P54631	X2JB15;P54631	-0.969526	-0.901575
2098	P55162	P55162	0.0943565	0.0662492
2099	P55828	P55828	-0.459977	-0.43401
2100	P55830	P55830	-0.258989	-0.318375
2101	P55841	P55841	-0.103205	-0.180007
2103	P56175	P56175	0.445985	0.283407
2104	P56538	P56538	-0.0184061	-0.0502718
2105	P61851;M9PF91	P61851;M9PF91	-0.259121	-0.224498
2107	P80455	P80455	-0.287477	-0.261625
2108	P81900	P81900	0.0443106	0.0299173
2109	P82804	P82804	0.349744	0.314847
2110	P82890	P82890	-0.307437	-0.277676
2111	Q7KUZ1;P83094;M9NF82	Q7KUZ1;P83094	0.312466	0.367881
2112	P83097	P83097	-0.739705	-0.644975
2113	P83102	P83102	0.671348	0.657267
2114	P83103	P83103	0.0319392	0.112576
2116	X2J6D4;P84029;M9PD22;P04657	X2J6D4;P84029	-0.262471	-0.274252
2117	Q4AB57;P84051	Q4AB57;P84051	-0.371655	-0.646662
2118	P84345	P84345	-0.337968	-0.488959
2119	P91634	P91634	0.0448314	0.10169
2120	P91638	P91638	0.284987	0.342001
2121	X2JAE6;P91679	X2JAE6;P91679	-0.471218	-0.268733
2122	P91682	P91682	0.334989	0.490002
2123	P91875	P91875	0.139944	0.11544
2124	P91926	P91926	0.0582857	0.0440244
2125	P91927	P91927	0.0553714	0.134409
2126	P91931	P91931	-0.179918	-0.224292
2127	P91938	P91938	-0.219301	-0.249333
2129	P92177	P92177	-0.203814	-0.146096
2130	P92204	P92204	0.175738	0.200545
2131	P98159	P98159	0.0989541	0.0562074
2132	P98163	P98163	0.21743	0.157223
2133	Q00449;E1JH49	Q00449;E1JH49	-1.23415	-0.474874
2134	Q01637	Q01637	0.313043	0.286019
2135	Q02308	Q02308	0.134543	-0.0150154
2136	Q02427	Q02427	-0.169796	-0.186515
2137	Q03043	Q03043	-0.283434	-0.294552
2138	X2J950;Q03334	X2J950;Q03334	-0.576003	-0.522765
2139	Q03427;A0A0B4KFY9	Q03427;A0A0B4KFY9	-0.0298009	-0.0384141
2140	X2JFR1;Q04047;Q8IR16	X2JFR1;Q04047;Q8IR16	-0.132319	-0.226972
2141	Q04652	Q04652	-0.374373	-0.461188
2143	Q05344	Q05344	0.00283232	-0.0102139
2145	X2JH42;Q05825;L0MQ04	X2JH42;Q05825;L0MQ04	-0.277035	-0.290473
2146	Q05856	Q05856	-0.268029	-0.413022
2147	Q05913	Q05913	0.404706	0.344286
2148	Q059A4	Q059A4	-0.274107	-0.122439
2149	Q06849	Q06849	0.207164	0.210839
2152	Q08012	Q08012	-0.229359	-0.294135
2153	Q08473;A0A0B4K6U6	Q08473;A0A0B4K6U6	-0.0854224	-0.027013
2154	Q09332	Q09332	0.0968056	0.0988508
2155	Q0E8A7;M9NEH9	Q0E8A7;M9NEH9	0.278445	-0.0857516
2156	Q0E8E1;Q9I7R2	Q0E8E1;Q9I7R2	1.19834	0.83894
2157	Q0E8E5;Q2PDY3	Q0E8E5;Q2PDY3	2.95301	4.30537
2158	Q0E8E7	Q0E8E7	-0.487278	-0.565771
2159	Q0E8E8	Q0E8E8	-0.380727	-0.428364
2160	Q0E8F2;M9PF04;Q9VTX3	Q0E8F2;M9PF04;Q9VTX3	0.109064	0.072509
2161	Q0E8G5;X2JCR2	Q0E8G5;X2JCR2	-0.102071	-0.105921
2162	Q0E8G6;Q9VSY2	Q0E8G6;Q9VSY2	0.356857	0.386889
2163	Q8IRB6;Q0E8H9	Q8IRB6;Q0E8H9	0.0683964	0.0833108
2164	Q0E8J0	Q0E8J0	-0.0193364	-0.0057194
2165	Q0E8K5;X2J8G3	Q0E8K5;X2J8G3	-0.115697	-0.164412
2166	Q0E8K6	Q0E8K6	-0.177073	-0.328763
2167	Q0E8M3	Q0E8M3	-0.167682	-0.346925
2168	Q0E8N2;Q9V9Q6	Q0E8N2;Q9V9Q6	0.98408	0.632412
2169	Q0E8P1;Q9VIX6	Q0E8P1;Q9VIX6	0.354322	0.0781806
2171	Q0E8Q7;E1JHH7	Q0E8Q7	0.0501264	0.218315
2172	Q0E8T6	Q0E8T6	0.765253	0.68556
2174	Q0E8V7	Q0E8V7	-0.187248	-0.225303
2175	Q9W0Y5;Q0E8W1;Q8MMC6	Q9W0Y5;Q0E8W1;Q8MMC6	-0.0163278	-1.9688
2177	Q0E8X6;Q9W1Q8	Q0E8X6;Q9W1Q8	0.2805	0.216278
2178	Q0E8X7	Q0E8X7	-0.390582	-0.313101
2179	Q0E8X8	Q0E8X8	0.367512	0.406427
2180	Q0E931	Q0E931	-0.692099	-0.788277
2181	Q8MT78;Q0E949	Q8MT78;Q0E949	0.36538	0.480834
2182	Q0E959	Q0E959	0.407441	0.120018
2183	Q0E965;A0A0B4KF69;A1ZA05	Q0E965;A0A0B4KF69;A1ZA05	0.321374	0.333247
2184	Q0E981	Q0E981	-0.00902691	0.148598
2185	Q0E993;A0A0B4KF06	Q0E993;A0A0B4KF06	0.24084	0.284989
2186	Q0E9A5;A0A0B4KFH1	Q0E9A5;A0A0B4KFH1	-0.076843	-0.0491892
2187	Q0E9B5	Q0E9B5	0.0446548	0.105237
2188	Q0E9B6;A1Z8U9	Q0E9B6;A1Z8U9	-0.559028	-0.550884
2189	Q0E9E2;Q7KN97	Q0E9E2;Q7KN97	0.0618535	0.0943261
2190	Q0E9F9	Q0E9F9	0.108015	0.0487686
2191	Q0E9L9;Q0E9L4;Q0E9L8;A0A0B4K6Z3;Q0E9L7;Q0E9L6;A0A0B4KEF4;Q0E9I5;Q0E9K0;Q0E9J7;Q0E9J3;Q0E9I7;Q0E9I1;Q0E9H9;A1Z6X3;A0A0B4K7I5;A0A0... <Preview truncated at 128 characters>	Q0E9L9;Q0E9L4;Q0E9L8;A0A0B4K6Z3;Q0E9L7;Q0E9L6;A0A0B4KEF4;Q0E9I5;Q0E9K0;Q0E9J7;Q0E9J3;Q0E9I7;Q0E9I1;Q0E9H9;A1Z6X3;A0A0B4K7I5;A0A0... <Preview truncated at 128 characters>	1.83009	1.48429
2192	Q0E9N4	Q0E9N4	-0.0378244	-0.201063
2193	Q0KHQ1	Q0KHQ1	0.171599	0.176501
2194	Q0KHQ6;X2JED9;Q9VWH7	Q0KHQ6;X2JED9;Q9VWH7	-0.193419	-0.142752
2196	Q0KHR5;Q9VX92	Q0KHR5;Q9VX92	-0.000126583	0.0686753
2198	Q0KHS0	Q0KHS0	0.113758	0.166057
2199	Q0KHS7	Q0KHS7	0.303443	0.405905
2200	Q0KHT7	Q0KHT7	0.0867066	0.172573
2201	Q0KHU2	Q0KHU2	0.149961	0.0926558
2203	Q0KHU5	Q0KHU5	-0.934647	-1.08982
2204	Q0KHX4	Q0KHX4	0.917816	0.95731
2205	X2J9Z8;Q9W5E8;Q0KHX7;X2JHS3	X2J9Z8;Q9W5E8;Q0KHX7;X2JHS3	0.219553	0.215505
2206	Q0KHZ6	Q0KHZ6	-0.231341	-0.261792
2207	Q0KI00;D0IQM1;Q9VAM2	Q0KI00	0.228022	0.259061
2208	Q0KI05	Q0KI05	-1.68656	-1.74687
2209	Q0KI15	Q0KI15	0.379995	0.455464
2212	Q9VEZ0;Q0KI67;Q8INC3;Q8IH49;A0A0B4KGR6;Q8INC1;A0A0B4JCY5	Q9VEZ0;Q0KI67;Q8INC3	0.0647241	0.108672
2213	Q0KI97	Q0KI97	0.101166	0.209613
2214	Q0KI98	Q0KI98	-0.144762	-0.12852
2215	Q0KIB3	Q0KIB3	-0.0870006	-0.0803047
2216	Q7KNC5;Q8MSQ5;Q9VNA1;Q0KIB9;Q8IPN9;B7Z0T3;A4V2F2;A0A0B4K620;Q4ABH3;Q9VNA2;A0A0B4K6S8;B7Z0T6;Q8IPN8;A0A0B4KF88;A0A0B4KG49;Q8IPN6;... <Preview truncated at 128 characters>	Q7KNC5;Q8MSQ5;Q9VNA1;Q0KIB9;Q8IPN9;B7Z0T3;A4V2F2;A0A0B4K620;Q4ABH3;Q9VNA2;A0A0B4K6S8;B7Z0T6;Q8IPN8;A0A0B4KF88	0.337102	0.527044
2217	Q0KIE7;M9PBV0;Q3KN55;Q9NCP8;M9PHP8	Q0KIE7	-0.0624796	-0.109949
2218	X2J8C3;Q10714	X2J8C3;Q10714	0.58421	0.56336
2219	Q1LZ08	Q1LZ08	0.0498327	0.0680278
2220	Q1LZ24	Q1LZ24	-0.401803	-0.468876
2221	Q1RL12;A4V0B5;Q24048	Q1RL12;A4V0B5;Q24048	0.445657	0.760827
2222	Q1WWB7	Q1WWB7	0.0235368	-0.119016
2223	Q1WWH6;Q9VFI0;A0A0B4KGP0;Q9VFH9;A0A0B4KFZ6	Q1WWH6;Q9VFI0;A0A0B4KGP0;Q9VFH9;A0A0B4KFZ6	-0.0876147	-0.14518
2224	Q23972	Q23972	1.48134	1.4799
2225	Q23973	Q23973	-0.624671	-0.472214
2226	Q23976;A0A0B4KFM4	Q23976	0.0460024	0.0561261
2227	Q23983	Q23983	0.0826279	0.121714
2228	Q23985	Q23985	-0.306751	-0.262364
2229	Q24020	Q24020	0.00817362	0.0700811
2230	Q24039	Q24039	-0.32813	-0.57321
2231	Q24044	Q24044	-0.0382424	-0.13367
2232	Q24050	Q24050	-0.0410304	-0.161695
2233	T2FFI3;Q24087	T2FFI3;Q24087	-0.381491	-0.39442
2234	Q24090	Q24090	-0.0890911	-0.116155
2235	Q24113;O76892	Q24113	-0.38956	-0.388103
2237	Q53ZT0;Q24133	Q53ZT0;Q24133	0.0080333	0.0750819
2238	X2JE29;Q24134	X2JE29;Q24134	-0.162785	0.000554701
2239	Q24145	Q24145	0.943134	0.8733
2240	Q24152	Q24152	-0.272158	-0.333108
2241	Q24154	Q24154	-0.0108136	-0.0141186
2243	Q24157	Q24157	-0.00552294	-0.039498
2244	Q24168	Q24168	0.101075	0.0648278
2245	Q24169	Q24169	0.115696	0.185689
2246	Q24171	Q24171	0.12934	0.133884
2247	Q24173;M9PEL6	Q24173;M9PEL6	0.0842098	0.218983
2248	Q24179	Q24179	0.200353	0.209549
2249	Q24185	Q24185	-0.0939672	-0.0498187
2250	X2JKU5;Q24186	X2JKU5;Q24186	0.199934	0.161192
2251	Q24216	Q24216	0.083381	0.0926987
2252	X2JDJ5;Q24247	X2JDJ5;Q24247	0.640249	0.413973
2253	Q24253	Q24253	0.0906435	0.11546
2254	Q24276	Q24276	0.0492624	0.0813592
2255	Q24297	Q24297	0.968248	1.10142
2256	Q24298	Q24298	-0.0303432	-0.0918784
2257	Q24307	Q24307	-0.697806	-0.66291
2258	Q24311	Q24311	0.183944	0.215656
2259	Q24314	Q24314	0.0420807	0.0161622
2260	Q24317	Q24317	-0.130529	-0.0864491
2261	Q24318;A0A0B4KEQ0	Q24318;A0A0B4KEQ0	-0.0127866	-0.0203852
2262	Q24319	Q24319	-0.431046	-0.386043
2263	Q24323;A1ZAF5;Q29QV5;A0A0B4KG38	Q24323	0.123885	0.119933
2264	Q24324;X2JAZ3;REV__CON__Q28107	Q24324;X2JAZ3	0.398227	0.404913
2265	Q24338	Q24338	-0.105184	-0.196562
2266	Q24368	Q24368	-0.137061	-0.0870691
2267	Q24371	Q24371	0.365619	0.298125
2268	Q24372	Q24372	-0.273503	-0.361021
2269	X2JCV2;Q24388	X2JCV2;Q24388	1.02652	0.986637
2272	Q24439	Q24439	0.106286	0.182561
2273	Q24472	Q24472	0.119076	0.254018
2274	Q24478	Q24478	0.11159	0.0592679
2275	Q8SYR3;Q24491	Q8SYR3;Q24491	0.205427	0.226713
2276	Q24492	Q24492	0.0774156	0.0584757
2277	Q24523;X2J847;M9PCT7;Q24522	Q24523;X2J847	0.712	0.736307
2278	Q24558	Q24558	5.4555	5.52424
2279	Q24560;A1ZBL0;A0A0B4LGH1;P08841	Q24560;A1ZBL0	-0.307022	-0.318964
2280	X2JFU0;Q24564	X2JFU0;Q24564	0.515207	0.423416
2281	Q24574	Q24574	0.00977504	-0.0420575
2282	Q24583	Q24583	0.26949	0.259453
2283	Q24592	Q24592	0.302142	0.267614
2284	Q24595	Q24595	0.866609	0.926642
2286	Q27237;A0A0B4K7M9;D3DN23;Q7KVH7	Q27237;A0A0B4K7M9;D3DN23;Q7KVH7	-0.430042	-0.363563
2287	Q27268;M9PC90	Q27268;M9PC90	0.0228693	-0.0325013
2288	Q27272	Q27272	-0.0893009	0.0428868
2289	Q27294;M9PH94;M9PHV6	Q27294;M9PH94	0.738937	0.685464
2290	Q27297	Q27297	0.533093	0.396499
2291	Q27333	Q27333	-0.935053	-1.0598
2292	Q27411	Q27411	-0.0833099	-0.102017
2293	X2JF40;Q27580;M9PHN8	X2JF40;Q27580;M9PHN8	-0.220503	-0.178553
2294	Q27607	Q27607	-0.134711	-0.117578
2295	Q27869;A0A0B4KGK0	Q27869;A0A0B4KGK0	0.254155	0.0820625
2297	Q29QE1;X2J9V9;X2JC00;C1C560	Q29QE1;X2J9V9;X2JC00;C1C560	0.305744	0.3215
2298	Q29QN4	Q29QN4	0.409494	0.370643
2299	Q29QQ9	Q29QQ9	0.266601	0.242819
2300	Q29QY7;Q86BG3	Q29QY7;Q86BG3	-1.09688	-1.00419
2301	Q29R09	Q29R09	0.00915564	-0.0633988
2302	Q29R10	Q29R10	-1.23271	-1.2103
2303	Q2EZ47;A0A140SQB4	Q2EZ47;A0A140SQB4	0.0767744	0.0552701
2304	Q2PDP6	Q2PDP6	-0.352695	-0.360093
2306	Q2PDR0	Q2PDR0	-0.681068	-0.575619
2307	Q2PDU0	Q2PDU0	-0.511442	-0.887605
2308	Q2PDW6;Q9VR58;M9PI43	Q2PDW6;Q9VR58;M9PI43	-0.513243	-0.95696
2309	Q2PDX2;M9PF23	Q2PDX2;M9PF23	0.267987	0.0498375
2310	Q2PE14	Q2PE14	0.407554	0.232645
2311	Q32KD2	Q32KD2	0.10753	0.077206
2312	Q32KD3;Q7KSW1;Q494I1;A0A0B4KGS8;Q9VHW9;A0A0B4KGF6	Q32KD3;Q7KSW1;Q494I1;A0A0B4KGS8;Q9VHW9;A0A0B4KGF6	-0.247887	-0.121733
2313	Q7KY08;Q32KD4	Q7KY08;Q32KD4	0.108804	0.00154324
2314	Q3YMU0	Q3YMU0	-0.272608	-0.192091
2315	Q3ZAN1	Q3ZAN1	-1.08124	-0.984855
2316	Q494G8	Q494G8	-0.22953	-0.165532
2317	Q494K2	Q494K2	0.0471516	0.0906742
2319	Q9I7R1;Q4LDP7;E1JHY0;Q0E8F4;Q0E8F5;X2JGK6	Q9I7R1;Q4LDP7;E1JHY0;Q0E8F4;Q0E8F5;X2JGK6	-0.1229	-0.0297931
2320	Q4QPR8	Q4QPR8	0.288301	0.28753
2321	Q4QPU3	Q4QPU3	0.677039	0.586233
2322	Q4QQ01	Q4QQ01	0.0409345	0.161882
2323	Q4QQ12	Q4QQ12	1.02626	1.06201
2325	Q4QQ93	Q4QQ93	0.537769	0.417402
2327	Q8IH56;Q4U2G8	Q8IH56;Q4U2G8	-0.462587	-0.166026
2328	Q4U2Q5	Q4U2Q5	1.76388	1.8957
2329	Q4V3Z5	Q4V3Z5	0.165161	0.100842
2330	Q4V429	Q4V429	0.176009	0.466539
2331	Q4V4H7	Q4V4H7	0.328141	0.375247
2332	Q4V5A3	Q4V5A3	0.209778	0.0843463
2333	Q4V5H0;Q9VCD4	Q4V5H0;Q9VCD4	-1.22643	-1.5211
2334	Q4V5H1	Q4V5H1	0.0763174	0.0511845
2337	Q4V619	Q4V619	0.00927014	-0.165534
2338	Q4V665	Q4V665	-0.466482	-0.469263
2340	Q4V6F7	Q4V6F7	0.115105	0.0387784
2342	Q4V6M1	Q4V6M1	0.2695	0.359106
2343	Q4V6X9	Q4V6X9	-1.57075	-1.66826
2344	Q4Z8K6;A0A0B4K851;A0A126GUM4	Q4Z8K6;A0A0B4K851;A0A126GUM4	0.0110323	-0.0313876
2345	Q500X4;A1Z9G3	Q500X4	-0.364613	-0.782762
2346	Q500Y7	Q500Y7	-0.585496	-0.649448
2347	Q540Y4;Q9XYQ2	Q540Y4;Q9XYQ2	-0.726012	-0.475715
2348	Q540Z9;Q9XZT6	Q540Z9;Q9XZT6	-0.0792233	-0.319314
2349	Q59DP9;Q59DP8	Q59DP9;Q59DP8	-0.046917	0.0359884
2352	Q59E01;Q8IPM6;Q86BB1;Q95RI8	Q59E01;Q8IPM6;Q86BB1;Q95RI8	0.424405	0.140534
2353	Q59E09;Q9VP61	Q59E09;Q9VP61	-0.909905	-0.979292
2354	Q59E30;Q95RI5;M9PFH6;M9PFW1;Q59E29;Q86BI4	Q59E30;Q95RI5;M9PFH6;M9PFW1;Q59E29;Q86BI4	-0.169421	-0.167216
2355	Q59E33;A0A023GQ04;Q86MQ9	Q59E33	0.104169	0.151445
2356	Q8IR19;Q59E43	Q8IR19;Q59E43	0.756156	0.768511
2357	Q59E58;Q59E59;A0A0B4JD57;A0A0B4K7Q4;A0A0B4JD95;Q99323;REV__Q9VTC4	Q59E58;Q59E59;A0A0B4JD57;A0A0B4K7Q4;A0A0B4JD95;Q99323	-0.0658335	-0.0424311
2358	Q5BI03	Q5BI03	-0.269013	-0.439477
2359	Q5BI31	Q5BI31	-1.05928	-1.14184
2360	Q5BI42	Q5BI42	-0.376401	-0.368292
2361	Q5BI50	Q5BI50	0.250287	0.269917
2362	Q5BIA9	Q5BIA9	0.26845	0.295255
2363	Q5BIL9	Q5BIL9	1.18468	1.2656
2364	Q5EAK6	Q5EAK6	0.034608	0.0699369
2365	Q5LJP6;A4V2C3;Q5LJP5;M9PGA6	Q5LJP6;A4V2C3;Q5LJP5;M9PGA6	0.506338	0.608566
2366	Q5LJP9	Q5LJP9	-0.346328	-0.324918
2367	Q5LJQ3	Q5LJQ3	0.541925	0.637054
2369	Q5LJZ2	Q5LJZ2	0.963813	1.12637
2370	Q5U0V7	Q5U0V7	0.348705	0.309542
2371	Q5U0X8	Q5U0X8	-0.212664	-0.270672
2372	Q5U117	Q5U117	-0.146301	-0.199232
2373	Q5U124;Q8T0N3;A0A0B4LEU9	Q5U124;Q8T0N3;A0A0B4LEU9	-0.0526562	-0.105721
2374	Q5U191;Q7JQU9	Q5U191;Q7JQU9	0.254961	0.266736
2375	Q6AWJ5	Q6AWJ5	0.139492	0.266095
2376	Q6AWN0	Q6AWN0	-0.420655	-0.521848
2377	Q6IDF5	Q6IDF5	-0.207546	-0.221446
[truncated: 3,593 more rows]

## Sheet: LFQ_Deviation_Anova+
LFQ_ID	Uniprot ID	Majority protein IDs	Log2 Deviation DLVtl	Log2 Deviation DLVsp
9	A0A0B4JCU8;Q9V8M5	A0A0B4JCU8;Q9V8M5	-0.285332	-0.304042
15	A0A0B4JCZ3	A0A0B4JCZ3	-0.771382	-0.784745
16	A0A126GV04;A0A0B4JCZ4;Q24547	A0A126GV04;A0A0B4JCZ4;Q24547	0.237356	0.321493
18	A0A0B4LHP1;A0A0B4JD02;A0A0B4JDF1;P16371;A0A0B4KH09;A0A0B4K6L6	A0A0B4LHP1;A0A0B4JD02;A0A0B4JDF1;P16371;A0A0B4KH09;A0A0B4K6L6	-0.117257	-0.0353996
29	A0A0B4JDE8;Q9VF71	A0A0B4JDE8;Q9VF71	0.687007	0.553463
30	A0A0B4JDF4;Q9VAL5;P35832	A0A0B4JDF4;Q9VAL5;P35832	0.795562	0.938994
39	A0A0B4K661;A0A0B4KG68	A0A0B4K661;A0A0B4KG68	-0.181657	-0.26885
41	A0A0B4K664;Q9VEZ3;A0A0B4K700;E1JIM4;REV__Q7JX87;REV__A1Z893;REV__A1Z892	A0A0B4K664;Q9VEZ3;A0A0B4K700;E1JIM4	0.0952272	0.142886
44	Q9XZ01;A0A0B4K692	Q9XZ01;A0A0B4K692	1.08402	1.03196
49	A0A0B4KHM3;A0A0B4K6C1;Q0KI30;Q8SZS0;A0A0B4KHV7;A0A0B4KH49	A0A0B4KHM3;A0A0B4K6C1;Q0KI30;Q8SZS0;A0A0B4KHV7	1.08022	0.896049
50	A0A0B4K6C3;Q9VHS2	A0A0B4K6C3;Q9VHS2	-0.443554	-0.441264
59	A0A0B4K6K7;Q9VI55	A0A0B4K6K7;Q9VI55	-0.23204	-0.0998413
67	A0A0B4K6N7;Q9VE34	A0A0B4K6N7;Q9VE34	0.142109	0.174179
76	A0A0B4K6X7;A1Z8J0;E8NH71	A0A0B4K6X7;A1Z8J0;E8NH71	-0.0879615	-0.11259
80	Q0E9B2;A1Z904;A1Z906;E2QCB7;A1Z907;A0A0B4K6Z2;A8DYB7	Q0E9B2;A1Z904;A1Z906;E2QCB7;A1Z907;A0A0B4K6Z2;A8DYB7	1.6007	1.70159
82	A0A0B4K726;Q960E8	A0A0B4K726;Q960E8	0.429845	0.360854
94	A0A0B4K7G4;P13469	A0A0B4K7G4;P13469	-0.856468	-0.818424
103	A0A0B4K7Q6;Q9VCH4	A0A0B4K7Q6;Q9VCH4	-1.44126	-1.46411
107	A0A0B4K7S0;P55824;A0A0B4K6W2	A0A0B4K7S0;P55824;A0A0B4K6W2	0.0795099	0.116238
114	A0A0B4K7Z5;Q7KLV9	A0A0B4K7Z5;Q7KLV9	0.258343	0.33874
117	A0A0B4K812;Q7KNS3	A0A0B4K812;Q7KNS3	-0.117297	-0.0558557
119	A0A0B4K859;A1Z945	A0A0B4K859;A1Z945	-0.0289491	-0.0250126
125	A0A0B4K8A5;Q9W2F2	A0A0B4K8A5;Q9W2F2	0.167173	0.212557
127	A0A0B4KEH8;A0A0B4KEC2;Q9W5H8;Q5LJQ4	A0A0B4KEH8;A0A0B4KEC2;Q9W5H8;Q5LJQ4	0.0552631	0.171414
133	A0A0B4KEN1;A1Z7N4;A0A0B4KEF7;A0A0B4LEX2	A0A0B4KEN1;A1Z7N4;A0A0B4KEF7;A0A0B4LEX2	-0.297225	-0.0766404
136	A0A0B4KEH0;P29310	A0A0B4KEH0;P29310	-0.42677	-0.377337
152	Q7JVY0;A0A0B4KEU5	Q7JVY0;A0A0B4KEU5	-0.0602017	-0.0670081
153	A0A0B4KEV9;A8DYK1;Q9W2Q7;A0A0B4LH15	A0A0B4KEV9;A8DYK1;Q9W2Q7;A0A0B4LH15	-0.0817638	-0.339127
163	A0A0B4KF31;Q9W1X9	A0A0B4KF31;Q9W1X9	0.676068	0.561943
168	Q7JQL5;A0A0B4KF86	Q7JQL5;A0A0B4KF86	0.0388278	0.258226
179	A1Z7H3;Q8T3L1;A1Z7H2;A0A0B4KFE4	A1Z7H3;Q8T3L1;A1Z7H2;A0A0B4KFE4	-0.0845828	-0.0843866
192	A0A0B4KFJ2;O15945	A0A0B4KFJ2;O15945	0.184093	0.16094
193	A0A0B4KFJ7;Q9VHH9	A0A0B4KFJ7;Q9VHH9	-0.187409	-0.305528
195	A0A0B4KFL0	A0A0B4KFL0	0.517921	0.393005
202	Q6NR36;A0A0B4KFQ3	Q6NR36;A0A0B4KFQ3	-0.136788	-0.330038
208	A0A0B4KFT0;Q94514	A0A0B4KFT0;Q94514	-0.434281	-0.556221
222	A0A0B4KFZ0;P81928	A0A0B4KFZ0;P81928	0.267037	0.418312
224	A0A0B4KG16;Q9VF36	A0A0B4KG16;Q9VF36	0.790877	0.79379
228	Q9VF92;A0A0B4KG69	Q9VF92;A0A0B4KG69	0.333279	0.376968
234	Q9N6D7;A0A0B4KG96	Q9N6D7;A0A0B4KG96	-0.0402611	-0.0631562
235	E0R905;Q7KSP5;A0A0B4KGA3;A0A0B4K6S1;A0A0B4K6F4;Q8SZN9	E0R905;Q7KSP5;A0A0B4KGA3;A0A0B4K6S1;A0A0B4K6F4;Q8SZN9	-0.494857	-0.726659
241	A0A0B4KGF7;Q9VMY5;Q0KIE6	A0A0B4KGF7;Q9VMY5;Q0KIE6	-0.43902	-0.235854
247	A0A0B4KGK3;Q95RA8	A0A0B4KGK3;Q95RA8	0.55494	0.423777
253	A0A0B4KGQ0;Q9VCI7	A0A0B4KGQ0;Q9VCI7	0.143835	-0.00689847
255	Q9VEV1;A0A0B4KGS4	Q9VEV1;A0A0B4KGS4	-0.249131	-0.288693
271	A0A0B4KH34;P22464	A0A0B4KH34;P22464	-0.424778	-0.433249
272	A0A0B4KH36	A0A0B4KH36	-0.030963	-0.0186312
273	A0A0B4KH39;Q24210;E1JIS7;A8JR72;A8JR71	A0A0B4KH39;Q24210;E1JIS7	0.449781	0.357507
274	A0A0B4KH54;Q9VFL5	A0A0B4KH54;Q9VFL5	-0.499314	-0.434295
275	Q8IMR0;Q8IMR1;B7Z0Q8;A0A0B4KH68	Q8IMR0;Q8IMR1;B7Z0Q8;A0A0B4KH68	0.61715	0.611967
282	A0A0B4KHN4;A0A0B4KHA2;Q9VEK6	A0A0B4KHN4;A0A0B4KHA2;Q9VEK6	0.133587	0.25239
283	A0A0B4KHB2	A0A0B4KHB2	0.486004	0.26901
284	B7Z0L6;A0A0B4KHB9;Q8IN89	B7Z0L6;A0A0B4KHB9;Q8IN89	0.600599	0.542344
290	Q9VA83;A0A0B4KHF0	Q9VA83;A0A0B4KHF0	-0.161758	-0.194657
304	A0A0B4KHQ0;Q05652	A0A0B4KHQ0;Q05652	0.434188	0.317687
311	A0A0B4KHU6;A0A0B4KI14;Q9VBW6	A0A0B4KHU6;A0A0B4KI14;Q9VBW6	0.175427	-0.0982522
313	A0A0B4KHW0;B7Z0S0;Q8IMJ7;A4V3M5;Q9V407;E1JJ18	A0A0B4KHW0;B7Z0S0;Q8IMJ7;A4V3M5;Q9V407	2.4163	2.23429
317	A0A0B4KHX3;O76324	A0A0B4KHX3;O76324	0.324064	0.266074
319	A0A0B4KHY4;P08953	A0A0B4KHY4;P08953	-0.545987	-0.584999
325	Q9VC56;Q8IMW2;A0A0B4KI06;A0A0B4LIK5;A0A0B4KHF3;Q7KS15	Q9VC56;Q8IMW2;A0A0B4KI06;A0A0B4LIK5;A0A0B4KHF3;Q7KS15	0.156425	0.210774
328	A0A0B4KI24;Q27415	A0A0B4KI24;Q27415	-0.287975	-0.241743
331	Q59DT9;A0A0B4KI28;Q9VBJ2;A0A0B4KHX4;Q8IMS2	Q59DT9;A0A0B4KI28;Q9VBJ2;A0A0B4KHX4;Q8IMS2	-0.0209977	0.113484
333	A0A0B4KI38;Q9V9X4	A0A0B4KI38;Q9V9X4	-0.131022	-0.137778
337	A0A0B4KI71	A0A0B4KI71	0.0307227	0.223021
341	A0A0B4LES3;Q9V9E3	A0A0B4LES3;Q9V9E3	0.0595941	0.128342
343	Q7K4C2;A0A0B4LET0	Q7K4C2;A0A0B4LET0	-1.00962	-1.0098
346	A0A0B4LEV3;Q7JWR9	A0A0B4LEV3;Q7JWR9	-0.05639	-0.0067876
350	A0A0B4LEY4;A1Z7K9	A0A0B4LEY4;A1Z7K9	-0.0465775	-0.0284427
355	A0A0B4LF45;P82712	A0A0B4LF45;P82712	-1.29814	-1.30226
357	A0A0B4LF54;Q9V770;P33270	A0A0B4LF54;Q9V770	0.396747	1.35313
361	A0A0B4LF92;A1Z9A2	A0A0B4LF92;A1Z9A2	-0.485013	-0.466025
362	A1Z942;A1Z943;Q0E9A1;E1JH47;Q7JQK6;A0A0B4LGA3;Q961I1;A0A0B4LF95;A1Z944;Q1RL13	A1Z942;A1Z943;Q0E9A1;E1JH47;Q7JQK6;A0A0B4LGA3;Q961I1;A0A0B4LF95;A1Z944;Q1RL13	2.54969	2.66334
368	A0A0B4LFD2;P29845	A0A0B4LFD2;P29845	-0.0550774	-0.0196415
372	A0A0B4LFF6;Q7K3C2	A0A0B4LFF6;Q7K3C2	0.0649873	0.687817
376	A0A0B4LFJ1;Q23997	A0A0B4LFJ1;Q23997	0.208527	0.152149
387	A0A0B4LFT2;Q27606;Q9V4T5	A0A0B4LFT2;Q27606	1.00604	1.31134
389	A0A0B4LFU5;Q8IGJ0	A0A0B4LFU5;Q8IGJ0	0.626095	0.806578
390	A0A0B4LFU9	A0A0B4LFU9	0.0492303	-0.237774
392	A0A0B4LFW6;A1Z7S0	A0A0B4LFW6;A1Z7S0	0.189518	0.238691
394	A0A0B4LFX2;A0A0B4K6U3;A1Z7T1;A0A0B4LF03;A0A0B4LEI8;A1Z7T0;A0A0B4K727;A0A0B4JD07;A1Z7T3;A8DY76;A0A0B4LEY5;A1Z7T2;E1JH15;A1Z7T4	A0A0B4LFX2;A0A0B4K6U3;A1Z7T1;A0A0B4LF03;A0A0B4LEI8;A1Z7T0;A0A0B4K727;A0A0B4JD07;A1Z7T3;A8DY76;A0A0B4LEY5;A1Z7T2;E1JH15	0.307807	0.29873
403	A0A0B4LG52;Q9W237	A0A0B4LG52;Q9W237	-0.601028	-0.607488
409	A0A0B4LGB0;Q24007;Q8MLT4	A0A0B4LGB0;Q24007;Q8MLT4	0.235959	0.223949
410	A0A0B4LGC0;Q9V6K1;A0A0B4LF88	A0A0B4LGC0;Q9V6K1;A0A0B4LF88	-0.12163	-0.0709046
418	A0A0B4LGH5;Q9V769	A0A0B4LGH5;Q9V769	-0.124291	-0.253795
419	Q9W1D9;A0A0B4LGH8	Q9W1D9;A0A0B4LGH8	0.961914	1.00136
422	A0A0B4LHH1;Q960R0;Q9W1B5;A0A0B4LGJ9	A0A0B4LHH1;Q960R0;Q9W1B5;A0A0B4LGJ9	-0.0388717	0.0545737
425	Q8MLP3;A0A0B4LGL2;Q9W188;D6W4U0	Q8MLP3;A0A0B4LGL2;Q9W188;D6W4U0	-0.344416	-0.0066917
429	Q9VNC3;A0A0B4LGM5;A0A0B4KF92;A0A0B4LGS6	Q9VNC3;A0A0B4LGM5;A0A0B4KF92;A0A0B4LGS6	0.164257	0.441653
431	A0A0B4LGQ8;Q9VN19	A0A0B4LGQ8;Q9VN19	0.809596	0.771248
433	A0A0B4LGS0;P81641;P08144	A0A0B4LGS0;P81641;P08144	1.82122	0.560969
434	A0A0B4LGS4;P54611	A0A0B4LGS4;P54611	-0.196918	-0.210427
447	A0A0B4LGZ8;Q8SY61	A0A0B4LGZ8;Q8SY61	1.72065	1.63863
448	A0A0B4LH34;Q8T913	A0A0B4LH34;Q8T913	0.513884	0.673671
461	A0A0B4LHF7;Q9VD51	A0A0B4LHF7;Q9VD51	-0.101361	-0.245309
464	A0A0B4LHI3;Q9XZL8	A0A0B4LHI3;Q9XZL8	0.0391038	-0.107476
468	A0A0B4LHQ9	A0A0B4LHQ9	-0.157993	-0.380309
470	A0A0B4LHS9;Q94547	A0A0B4LHS9;Q94547	0.187955	0.0457852
471	A0A0B4LHT3;Q9VAS7	A0A0B4LHT3;Q9VAS7	-0.48473	-0.518934
472	A0A0B4LHT4;Q8I0J6;Q9VNJ0	A0A0B4LHT4;Q8I0J6;Q9VNJ0	1.39581	1.24997
475	A0A0B4LJ12;A0A0B4LHX6;P08879	A0A0B4LJ12;A0A0B4LHX6;P08879	-0.365353	-0.368605
477	A0A0B4LI86;P08266	A0A0B4LI86;P08266	-0.0377519	-0.108801
489	A0A0C4DHD1;Q7KVH9	A0A0C4DHD1;Q7KVH9	0.745655	0.872787
491	A0A0C4DHE6;Q9VFS5	A0A0C4DHE6;Q9VFS5	0.279093	0.27186
494	Q8WR08;A0A0C4DHF6;A1ZA89;Q8STB9	Q8WR08;A0A0C4DHF6;A1ZA89;Q8STB9	-0.126493	-0.0299345
498	A0A0C4DHH3;Q7JUY8	A0A0C4DHH3;Q7JUY8	-3.72796	-3.49875
503	X2JB24;A0A0S0WH10;Q9VU58	X2JB24;A0A0S0WH10;Q9VU58	0.578372	0.74917
505	A0A0S0WNN6;Q9TVM2	A0A0S0WNN6;Q9TVM2	-0.0203466	0.0987471
506	A0A0S0WNT6;Q9VNS0	A0A0S0WNT6;Q9VNS0	-0.2958	-0.044772
514	A0A126GUP6	A0A126GUP6	-0.582562	-0.755062
515	A0A126GUQ3;Q9VNA8	A0A126GUQ3;Q9VNA8	0.0831625	-0.153539
516	A0A126GUQ4;Q0KIA8;Q9VI16	A0A126GUQ4;Q0KIA8;Q9VI16	0.0996924	0.157204
520	A0A126GUT1;Q9VGS2	A0A126GUT1;Q9VGS2	-0.337192	-0.287551
521	A0A126GUU0;Q9V3G6	A0A126GUU0;Q9V3G6	-0.33834	-0.326212
523	Q9VEZ6;A0A126GUV0	Q9VEZ6;A0A126GUV0	0.745799	0.467025
525	A0A126GUX4	A0A126GUX4	0.219429	0.225729
527	A0A126GV10;A0A126GV13	A0A126GV10;A0A126GV13	-0.274488	-0.157801
538	A1Z6F6;Q7JQF6;A1Z6F4;B7YZT1;A0A0B4KF30	A1Z6F6;Q7JQF6;A1Z6F4;B7YZT1;A0A0B4KF30	1.53077	1.62553
542	A1Z6H6	A1Z6H6	0.26389	0.184133
543	A1Z6H7	A1Z6H7	-0.10053	-0.0490464
544	A1Z6I7	A1Z6I7	0.195687	0.156948
556	A1Z6Z7	A1Z6Z7	0.690292	0.548166
557	A1Z6Z9;A1Z6Z8;A1Z700	A1Z6Z9;A1Z6Z8;A1Z700	0.158773	0.274448
560	A1Z729;Q7JYX2	A1Z729	1.02886	1.33352
563	A1Z757;Q7JY97	A1Z757;Q7JY97	1.9018	2.09079
565	Q8MSH0;A1Z765	Q8MSH0;A1Z765	-0.144727	-0.096903
568	A1Z784;Q7JV23;A8DY67	A1Z784;Q7JV23;A8DY67	0.244857	0.314961
572	A1Z7C1;A0A0B4KEM3	A1Z7C1;A0A0B4KEM3	-0.674097	-0.414951
577	A1Z7K2	A1Z7K2	0.220207	0.0972479
589	Q95T49;A1Z7S4;C9QPE2	Q95T49;A1Z7S4;C9QPE2	0.254586	-0.244761
591	Q7K3S2;A1Z7V8;A1Z7V9	Q7K3S2;A1Z7V8;A1Z7V9	0.775291	0.584773
594	A1Z7X7	A1Z7X7	-0.799277	-0.4671
599	A1Z818;E1JH25;E1JH24	A1Z818;E1JH25;E1JH24	-0.913754	-0.52285
602	A1Z840	A1Z840	-0.065319	-0.201279
603	A1Z843	A1Z843	-0.140875	-0.0895444
605	A1Z893	A1Z893	0.827388	0.839658
607	Q8T008;A1Z8A7;A8DY95	Q8T008;A1Z8A7;A8DY95	-1.02132	-0.919301
623	A1Z8U0	A1Z8U0	-0.0278608	-0.0299403
628	A1Z8X3	A1Z8X3	-0.363341	-0.640142
629	A1Z909	A1Z909	-0.0483484	0.0121738
630	A1Z933	A1Z933	0.505239	0.543455
632	A1Z936;A1Z935	A1Z936;A1Z935	0.0394469	0.103756
633	A1Z968;Q0E996	A1Z968;Q0E996	0.41756	0.423004
636	A1Z992	A1Z992	0.0831506	-0.0667836
644	A1Z9G2	A1Z9G2	0.227701	0.12442
645	A1Z9I0	A1Z9I0	0.83515	0.907573
650	A1Z9K0	A1Z9K0	0.187742	0.150147
651	A1Z9K4;Q7KQC4;A0A0B4JD18;Q95RE0;A0A0B4KEQ5	A1Z9K4;Q7KQC4;A0A0B4JD18;Q95RE0;A0A0B4KEQ5	-0.607654	-0.29925
662	A1Z9W2	A1Z9W2	0.207422	0.147228
668	A1ZA77	A1ZA77	2.0692	2.03415
669	A1ZA83	A1ZA83	0.181773	0.241975
670	A1ZA92	A1ZA92	-0.114696	-0.0247818
677	A1ZAG1	A1ZAG1	-2.71642	-2.4816
688	A1ZAW0;A0A0B4LFK8	A1ZAW0;A0A0B4LFK8	0.0803847	0.118121
689	A1ZAW3	A1ZAW3	0.771814	0.602537
695	A1ZAY5	A1ZAY5	-0.55377	-0.566467
696	A1ZAY8	A1ZAY8	0.481177	0.74007
697	A1ZB29	A1ZB29	0.381473	0.212088
699	A1ZB61	A1ZB61	1.49558	0.488845
700	A1ZB68	A1ZB68	-0.66855	0.232548
701	A1ZB71	A1ZB71	-0.0898023	-0.111248
702	A1ZB72	A1ZB72	-0.314443	-0.310856
703	A1ZB73	A1ZB73	2.34931	2.35561
704	A1ZB84;REV__A1ZB84	A1ZB84	0.60095	0.677918
706	A1ZBA5	A1ZBA5	-0.410472	-0.440381
709	A1ZBE8	A1ZBE8	0.482914	0.50222
716	A1ZBK7	A1ZBK7	0.191002	0.236456
720	A1ZBR2	A1ZBR2	0.597058	0.700488
723	A1ZBU5	A1ZBU5	2.24552	1.27809
724	A1ZBU8	A1ZBU8	0.780249	0.616871
725	A1ZBV0	A1ZBV0	-0.112526	-0.371509
729	A1ZBW7	A1ZBW7	0.460097	0.71939
735	A2VEI2	A2VEI2	-0.289694	-0.126466
736	A2VEK1	A2VEK1	0.389876	0.598918
737	A2VEY9;Q9VTV6	A2VEY9;Q9VTV6	-0.806412	-0.990542
739	A4UZL5;P41043	A4UZL5;P41043	-0.0870621	0.0278499
744	A4UZZ4;Q9XTL9	A4UZZ4;Q9XTL9	-0.0477451	-0.032583
745	A4V013;Q9NLA6	A4V013;Q9NLA6	1.55651	1.59719
747	A4V0R4;M9NDQ2;P54733	A4V0R4;M9NDQ2;P54733	0.441005	0.373902
749	A4V0U4	A4V0U4	-0.25013	-0.148438
753	A4V1B2;Q9NB04	A4V1B2;Q9NB04	0.399053	0.412446
754	A4V1Q1;A4V1Q0;M9PF25;Q24207;Q6NN06	A4V1Q1;A4V1Q0;M9PF25;Q24207;Q6NN06	0.0530327	0.16721
759	A4V2A4	A4V2A4	-0.545076	-0.200523
761	A4V2I0;Q7KSX2;P15364	A4V2I0;Q7KSX2;P15364	-0.185263	-0.303778
764	A4V303;P48605	A4V303;P48605	-0.300581	-0.260622
771	A4V3G8;Q7KRY6	A4V3G8;Q7KRY6	0.232438	0.309042
773	A4V3J6;A4V3J5;P07909	A4V3J6;A4V3J5;P07909	-0.09457	-0.113256
775	A4V3L3;Q7KRW1	A4V3L3;Q7KRW1	1.27263	1.26738
781	A4V3W8;Q9U1M2	A4V3W8;Q9U1M2	-0.353058	-0.0509077
784	A4V441;Q24524	A4V441;Q24524	0.138738	0.0142194
789	A4V4A5;Q9VZ23	A4V4A5;Q9VZ23	-0.399237	-0.343706
793	A4V4I8;X2JE15;E1JJA4;M9PHQ0;P27619;A4V4J0;M9PJN9;E1JJA5	A4V4I8;X2JE15;E1JJA4;M9PHQ0;P27619;A4V4J0;M9PJN9;E1JJA5	0.0126499	-0.0694749
797	A4V4U5;M9NHG9;M9NFJ2;Q04499	A4V4U5;M9NHG9;M9NFJ2;Q04499	-0.243867	-0.287859
800	A5XCL5;Q9VSW2;E1JI91;Q9VSW1	A5XCL5;Q9VSW2;E1JI91;Q9VSW1	0.202241	0.11833
801	A8DQW8	A8DQW8	-0.181564	-0.150129
806	A8DYC5;A8DYC4	A8DYC5;A8DYC4	0.69504	0.66885
809	A8DYJ2;A0A0B4K849;A0A0B4K7A5;Q02645	A8DYJ2;A0A0B4K849;A0A0B4K7A5;Q02645	0.435116	0.382756
818	D5SHT8;B7Z029;M9PB53;Q9VM99;A8DYW5;Q8IPJ4	D5SHT8;B7Z029;M9PB53;Q9VM99;A8DYW5;Q8IPJ4	0.12144	-0.0339225
822	A8DZ18;M9PD76;P16621;M9NCY3;M9PDF7;M9PDR3;M9PG93	A8DZ18;M9PD76;P16621;M9NCY3;M9PDF7;M9PDR3;M9PG93	0.0197895	0.0668582
827	A8E6W0	A8E6W0	0.21054	0.283317
834	M9PBP3;M9PE52;M9NE16;M9NF07;M9NF10;M9NDH6;Q9VZD7;M9ND42;M9ND44;A8JNK4	M9PBP3;M9PE52;M9NE16;M9NF07;M9NF10;M9NDH6;Q9VZD7;M9ND42;M9ND44;A8JNK4	0.27108	0.209247
851	A8JR14	A8JR14	0.244454	0.109254
853	A8JR46	A8JR46	-0.520132	-0.286879
858	A8JUP8	A8JUP8	3.73773	4.25464
859	A8JUQ9;Q9NHV9;M9PHJ6	A8JUQ9;Q9NHV9;M9PHJ6	-0.219522	-0.134406
861	A8JUV0	A8JUV0	0.00622135	0.118636
863	A8JUV4	A8JUV4	1.15761	1.10861
864	Q9W4Y6;A8JUV7	Q9W4Y6;A8JUV7	1.21627	1.19791
866	A8JUY0;Q9W4D2	A8JUY0;Q9W4D2	0.434365	0.485224
870	A8JV18;Q9VXE6	A8JV18;Q9VXE6	0.401562	0.347204
871	A8JV22;X2JEJ0;Q9W3F6;A8JV24	A8JV22;X2JEJ0;Q9W3F6;A8JV24	0.156234	0.18541
874	A8Y535	A8Y535	0.187134	0.288159
875	A8Y560;O17445	A8Y560;O17445	-1.03624	-1.03572
876	Q7PLP4;A8Y582;Q7PLP5	Q7PLP4;A8Y582;Q7PLP5	-0.0413859	-0.10597
877	A8Y589	A8Y589	-0.091975	-0.180331
879	E1JIT0;B3DNL7;O01367;A0A0B4KHV5	E1JIT0;B3DNL7;O01367;A0A0B4KHV5	0.0736144	-0.0666268
880	B4F5C5;Q9VXT7	B4F5C5;Q9VXT7	0.0436257	0.442473
882	B5RIM9;P13706;M9PET0;M9PC43	B5RIM9;P13706;M9PET0;M9PC43	-0.210855	-0.181606
884	B5RIR1;Q24046	B5RIR1;Q24046	0.154493	-0.0133626
886	B5RIV0;Q9V3S9	B5RIV0;Q9V3S9	0.114241	0.122297
893	B6IDQ5;Q9VRJ9;M9PED6	B6IDQ5;Q9VRJ9;M9PED6	-0.118043	-0.0404813
898	B7YZI0;Q9V7N5	B7YZI0;Q9V7N5	0.0499829	0.142912
902	B7YZK4;B7YZK5;A0A0B4KG78;A0A0B4JCT7;B7YZK6	B7YZK4;B7YZK5;A0A0B4KG78;A0A0B4JCT7;B7YZK6	0.20519	0.108524
908	B7YZR7;E1JGK5;Q9V895	B7YZR7;E1JGK5;Q9V895	-0.173386	-0.0730039
920	Q9VQL7;B7Z001	Q9VQL7;B7Z001	0.38108	0.555346
939	B7Z0E0;Q8IQA7;Q9VSI6;Q7KUB0	B7Z0E0;Q8IQA7;Q9VSI6;Q7KUB0	0.450369	0.527555
944	B7Z0G7;Q9VW97;M9PFR5	B7Z0G7;Q9VW97;M9PFR5	0.19101	0.176722
946	B7Z0I7	B7Z0I7	-0.351837	-0.286713
948	B7Z0J4	B7Z0J4	0.269596	0.394551
951	B7Z0R2;Q9VAS8;A0A0B4KHD2	B7Z0R2;Q9VAS8;A0A0B4KHD2	0.240885	0.327636
952	Q86BR6;B7Z0R7;Q95TJ1	Q86BR6;B7Z0R7;Q95TJ1	0.229499	0.0878479
958	B7Z0X7	B7Z0X7	-0.381607	-0.326224
959	F2FBA6;B7Z0Z0;Q24537	F2FBA6;B7Z0Z0;Q24537	-0.170676	-0.34783
975	C0PV74;Q9VYS0;H0RNK3	C0PV74;Q9VYS0;H0RNK3	-1.14604	-1.27089
979	C6SUW3;P55935;Q95RG1	C6SUW3;P55935;Q95RG1	-0.492196	-0.448378
982	C7LA75;P11147	C7LA75;P11147	-0.359354	-0.364303
986	C8VV14;P07764	C8VV14;P07764	-0.476905	-0.531983
988	C8VV95;P11420	C8VV95;P11420	0.850774	0.62729
989	C9QP21;P08171	C9QP21;P08171	-1.42462	-1.15907
1038	D0IQG7;Q9W092	D0IQG7;Q9W092	0.193243	0.214893
1042	D1FYH5;Q9VAJ4	D1FYH5;Q9VAJ4	0.714301	0.646753
1044	D1YSG7;Q00168;L0MLR4;L0MLP2	D1YSG7;Q00168;L0MLR4;L0MLP2	0.272264	0.257536
1048	D1Z3A2;Q24407	D1Z3A2;Q24407	-0.302212	-0.263055
1049	D2NUK9;Q9U3Z7	D2NUK9;Q9U3Z7	0.234767	0.266028
1052	D3DMM4;Q86B97;Q9VGE9;Q86B96;Q86B95;Q9VGF0;Q86B94	D3DMM4;Q86B97;Q9VGE9;Q86B96;Q86B95;Q9VGF0;Q86B94	0.766447	0.588297
1058	Q9VV51;D5AEK7;Q961F9	Q9VV51;D5AEK7;Q961F9	-0.14349	-0.0864822
1080	E1JH26;A1Z850	E1JH26;A1Z850	0.325118	0.248604
1081	E1JH39;Q7JUM5;A5YTR9;A1Z8Q7	E1JH39;Q7JUM5;A5YTR9;A1Z8Q7	0.153432	0.38251
1083	E1JH57;Q7K3L1	E1JH57;Q7K3L1	0.447529	0.30682
1090	E1JHD6;P92208	E1JHD6;P92208	-0.664189	-0.811225
1091	E1JHE1;Q9VKW4	E1JHE1;Q9VKW4	-0.100648	0.109765
1094	E1JHJ9;Q9VJE5;B7YZW8;E1JHK0;Q7KT48;M9PG37;B7YZW7;Q0E8Q1;M9PBC9;M9PDB4;X2JAQ4;Q0E8Q0	E1JHJ9;Q9VJE5;B7YZW8;E1JHK0;Q7KT48;M9PG37	0.0713141	0.129388
1095	E1JHK3;C7LA93;P15330	E1JHK3;C7LA93;P15330	-0.312421	-0.365083
1097	E1JHN2;Q9VIF3	E1JHN2;Q9VIF3	1.37928	1.64143
1107	M9NDT7;M9NG14;M9PI84;M9PCU3;M9NEC1;M9PFS5;E1JI13;P98081	M9NDT7;M9NG14;M9PI84;M9PCU3;M9NEC1;M9PFS5;E1JI13;P98081	1.92766	1.8987
1114	E1JIB4;Q9VZW2;Q8MRH9	E1JIB4;Q9VZW2;Q8MRH9	0.135413	0.187522
1118	E1JIG1;P29503	E1JIG1;P29503	-0.208981	-0.136938
1120	Q961C3;Q9VH75;E1JIH4	Q961C3;Q9VH75;E1JIH4	0.400762	0.401211
1123	E1JIK0;P48810	E1JIK0;P48810	0.0750673	0.119381
1124	Q7KSI9;E1JIL1	Q7KSI9;E1JIL1	-0.836075	-0.545753
1126	Q7KSE8;E1JIN6;Q8IN94;A0A0B4KHB1;A0A0B4KGD1	Q7KSE8;E1JIN6;Q8IN94;A0A0B4KHB1;A0A0B4KGD1	0.48506	0.389584
1136	E1JIY8	E1JIY8	0.895478	1.03362
1141	E1JJ73;O97067	E1JJ73;O97067	-0.313809	-0.179428
1144	X2JDB3;E1JJC3;X2JHT7;O97394;X2JDR3	X2JDB3;E1JJC3;X2JHT7;O97394;X2JDR3	-0.0708191	-0.120489
1147	E1JJF3;Q9V427	E1JJF3;Q9V427	-0.350856	-0.51454
1151	E1JJG4;Q9W395	E1JJG4;Q9W395	0.264415	0.250039
1153	E1JJK9;E1JJK7;X2JF93;P43125;E1JJK8;E1JJK6;M9PJM8;M9PEJ5	E1JJK9;E1JJK7;X2JF93;P43125;E1JJK8;E1JJK6;M9PJM8;M9PEJ5	0.277382	0.0801833
1160	E1JJQ3;Q8IQW7;X2JG40;E1JJQ4;Q9XYP7	E1JJQ3;Q8IQW7;X2JG40;E1JJQ4;Q9XYP7	0.241437	0.177588
1161	E1JJR3;Q9VWI1	E1JJR3;Q9VWI1	0.16573	0.340296
1163	Q9VRA4;E1JJS1	Q9VRA4;E1JJS1	0.502923	0.56238
1171	E2QCN9	E2QCN9	0.242064	0.243929
1175	E2QCR4;Q24009	E2QCR4;Q24009	-0.418651	-0.32603
1179	E2QCZ3;E2QCZ4	E2QCZ3	-0.297406	-0.508419
1182	E2QCZ9;Q7JZB4	E2QCZ9;Q7JZB4	-0.684512	-0.647748
1184	E2QD64;Q7K4H4	E2QD64;Q7K4H4	-0.114498	0.0481815
1187	Q9W3H6;Q7KVT3;X2JCZ1;M9PJD0;E2QD98;Q6NR03;Q0KHU9;X2JIZ6;Q9W3H8;Q9W3H7;M9NG38;M9NEZ2	Q9W3H6;Q7KVT3;X2JCZ1;M9PJD0;E2QD98;Q6NR03;Q0KHU9;X2JIZ6;Q9W3H8;Q9W3H7;M9NG38;M9NEZ2	0.23423	0.123604
1193	E8NHB1;Q24325	E8NHB1;Q24325	0.202074	0.226729
1197	F0JAI1;Q9VH48	F0JAI1;Q9VH48	-0.10734	-0.0836467
1199	Q8I0Q7;F0JAM2;Q9VZI4;Q8IRC2;E1JIC5;E1JIC6;Q95U18	Q8I0Q7;F0JAM2;Q9VZI4;Q8IRC2;E1JIC5;E1JIC6;Q95U18	-0.240782	-0.0751174
1200	M9PFH0;M9PF27;Q95SE8;F0JAQ9;Q9VU19	M9PFH0;M9PF27;Q95SE8;F0JAQ9;Q9VU19	0.696265	0.560749
1201	Q9VKM2;M9PCP4;M9NCT2;H5V8D0;X2J5L4;F2FB81	Q9VKM2;M9PCP4;M9NCT2;H5V8D0;X2J5L4;F2FB81	0.710458	0.651201
1202	F3YDH0;P29844	F3YDH0;P29844	-0.221378	-0.189966
1208	G3M3A2;Q06559	G3M3A2;Q06559	-0.537531	-0.505761
1209	G4LTX1;Q8IQ56	G4LTX1;Q8IQ56	-0.58367	-0.497153
1211	H0RNC9;Q9VMH7	H0RNC9;Q9VMH7	-0.476842	-0.730961
1214	H0RNN8;Q9VLK2	H0RNN8;Q9VLK2	0.12563	0.0484342
1221	H8F4T6;Q9V6U9	H8F4T6;Q9V6U9	0.388053	0.44598
1223	H9XVL5;Q9V4A7	H9XVL5;Q9V4A7	-0.0675202	0.0170674
1232	L0MPS3;Q9V496	L0MPS3;Q9V496	0.0332103	0.0332989
1234	L7ED64;L7EEF9;Q8MQI6	L7ED64;L7EEF9;Q8MQI6	-0.4051	-0.115854
1237	M9MRC9;P41092	M9MRC9;P41092	-0.313362	-0.343826
1241	M9MRG1;Q9VLF6	M9MRG1;Q9VLF6	0.0814682	0.0739942
1244	M9MRH0;Q9VKU8;M9PFI9;Q9VKV0	M9MRH0;Q9VKU8	-0.376503	-0.351811
1250	M9MRM4;Q9W0I6	M9MRM4;Q9W0I6	-0.00152388	0.040926
1257	M9MRT6;P08645	M9MRT6;P08645	-0.281463	-0.181956
1264	M9MS15;P23654	M9MS15;P23654	-0.28244	-0.229796
1266	Q9W321;M9MS40;M9PH39	Q9W321;M9MS40;M9PH39	-0.0244751	0.00947366
1286	M9NCX1;P08111;M9PBJ2	M9NCX1;P08111;M9PBJ2	-0.340609	-0.34227
1288	M9ND06;Q9VQ37;M9NDD0	M9ND06;Q9VQ37;M9NDD0	-0.328789	-0.523135
1294	M9ND57;Q9VS82;M9PEE7;B7Z0D3;Q9VS83;M9PHN9;M9PBU3;B7Z0D4	M9ND57;Q9VS82;M9PEE7;B7Z0D3;Q9VS83;M9PHN9;M9PBU3;B7Z0D4	0.353904	0.273463
1306	M9NDP1;Q24117;M9NDC7;O96860	M9NDP1;Q24117;M9NDC7;O96860	0.0110477	-0.014929
1312	M9NDU8;Q9VVG6	M9NDU8;Q9VVG6	0.855454	0.750168
1322	M9NE68;P02516	M9NE68;P02516	-1.24455	-1.03804
1328	M9NED8;Q8SY41	M9NED8;Q8SY41	-0.0106954	0.11505
1336	M9NEW0	M9NEW0	-0.327891	0.0309805
1338	M9NEZ0;Q9VKJ9	M9NEZ0;Q9VKJ9	-0.364932	-0.179941
1342	M9NF18;Q9VYW5;M9NED4	M9NF18;Q9VYW5;M9NED4	-0.0858327	-0.146693
1343	Q9V3K7;M9NF32	Q9V3K7;M9NF32	0.290101	0.253344
1347	M9NF69;Q23989	M9NF69;Q23989	-0.401611	-0.23282
1348	M9NFA7;Q9VX91	M9NFA7;Q9VX91	-0.268327	-0.248532
1349	M9NFF0;Q8SYF7;M9NDV5;Q5LJR0;Q5LJR2	M9NFF0;Q8SYF7;M9NDV5;Q5LJR0;Q5LJR2	2.25288	2.13295
1357	M9NFR3;P14785	M9NFR3;P14785	0.469993	0.435405
1365	M9PAY6;M9PDS0;Q9VPM7	M9PAY6;M9PDS0;Q9VPM7	0.387747	0.365711
1371	Q9VMU1;M9PB41;M9PEP4	Q9VMU1;M9PB41;M9PEP4	0.0421795	0.198033
1375	M9PB68;Q9VLT5	M9PB68;Q9VLT5	0.056322	0.0706862
1387	Q8INW0;M9PBE2;Q9VIT1;Q8INV9	Q8INW0;M9PBE2;Q9VIT1;Q8INV9	-0.242099	-0.497924
1391	M9PBH9;Q9W0E8	M9PBH9;Q9W0E8	0.527882	0.425918
1398	M9PBM1;Q94535	M9PBM1;Q94535	0.562808	0.401664
1401	Q8SXR1;M9PBN2	Q8SXR1;M9PBN2	-1.20129	-1.05112
1406	M9PEC8;M9PEN4;M9PBQ3;P37276	M9PEC8;M9PEN4;M9PBQ3;P37276	0.11698	0.120189
1407	M9PBQ4;Q9VQ79	M9PBQ4;Q9VQ79	-0.367514	-0.42086
1409	Q9VRR4;Q8I935;M9PBR6;Q8I934	Q9VRR4;Q8I935;M9PBR6;Q8I934	0.298591	0.524366
1416	M9PBX0;P42003	M9PBX0;P42003	-0.140817	-0.287884
1423	Q0E8F8;M9PI07;M9PC64;Q8IQE9;M9PF47	Q0E8F8;M9PI07;M9PC64;Q8IQE9;M9PF47	-0.250844	-0.292585
1424	M9PC74;Q7K1W8	M9PC74;Q7K1W8	-0.40022	-0.206555
1434	M9PCC6;Q9VMA0	M9PCC6;Q9VMA0	0.0750438	-0.0590335
1435	Q9VM93;M9PCR7;M9PCD4;M9PC73	Q9VM93;M9PCR7;M9PCD4;M9PC73	-0.214173	-0.384584
1436	M9PCE0;Q01604	M9PCE0;Q01604	-0.189797	-0.197325
1438	M9PCE8;Q9VLJ6	M9PCE8;Q9VLJ6	-0.0550758	-0.0616836
1439	M9PCF1;Q9VQH2	M9PCF1;Q9VQH2	0.0932223	-0.170023
1442	M9PCH8;Q9VLU0	M9PCH8;Q9VLU0	0.167183	0.157698
1443	X2J9V7;Q8IPG6;M9PCI1	X2J9V7;Q8IPG6;M9PCI1	-0.867611	-1.02566
1449	M9PCK7;Q9VLJ8	M9PCK7;Q9VLJ8	-0.067729	-0.217393
1450	M9PCL4;Q9VMV6	M9PCL4;Q9VMV6	0.832595	0.904857
1451	M9PCL5;Q9VKX4	M9PCL5;Q9VKX4	0.136398	0.0106708
1452	M9PCL6;P08761;Q7KUM8;M9PI66;Q7KUN2	M9PCL6;P08761;Q7KUM8;M9PI66	-0.124297	-0.0598389
1459	M9PCR4;Q9VUY8	M9PCR4;Q9VUY8	-0.118599	0.150749
1460	M9PCV1;Q9VK27	M9PCV1;Q9VK27	0.81992	0.637194
1461	M9PCV9;Q9VVI9	M9PCV9;Q9VVI9	0.168717	0.255009
1462	Q8IPG9;M9PCW5;Q7KTJ7	Q8IPG9;M9PCW5;Q7KTJ7	-0.265797	-0.0821337
1468	M9PD08;Q9VK85	M9PD08;Q9VK85	-0.369817	-0.323065
1476	M9PD33;Q9VK07	M9PD33;Q9VK07	1.76272	0.951013
1480	M9PDG3;M9PD57;P40798	M9PDG3;M9PD57;P40798	0.377384	0.531146
1483	M9PD73;M9PDF6;Q9VIT9;M9PDR0	M9PD73;M9PDF6;Q9VIT9;M9PDR0	-0.903631	-0.619498
1487	M9PD95;Q03017	M9PD95;Q03017	0.686924	0.477189
1488	M9PDA6;Q9VIK9	M9PDA6;Q9VIK9	-0.56557	-0.472947
1499	M9PDL9;P16568;M9PDB8;M9NDR2	M9PDL9;P16568;M9PDB8;M9NDR2	-0.072817	-0.0148043
1501	M9PDM5;P25157	M9PDM5;P25157	-0.62024	-0.263996
1505	M9PDS1;Q9W0M3	M9PDS1;Q9W0M3	-0.809499	-0.692094
1510	M9PDY5;Q9VZT7;Q8SX64;M9PEG0;M9PE55	M9PDY5;Q9VZT7;Q8SX64;M9PEG0;M9PE55	-0.163816	-0.146456
1515	M9PEA1;Q9VRQ5	M9PEA1;Q9VRQ5	0.764876	0.873925
1521	M9PEF6;Q9VQX4;M9PC31	M9PEF6;Q9VQX4;M9PC31	0.949072	1.05993
1533	M9PES6;Q9VSL7	M9PES6;Q9VSL7	0.398146	0.251118
1536	M9PET7;Q9VTC2	M9PET7;Q9VTC2	0.109826	0.275448
1538	M9PEV2;Q9VSS9	M9PEV2;Q9VSS9	1.84433	2.05384
1541	M9PEX3;P55965	M9PEX3;P55965	0.615349	0.200159
1546	M9PEZ4;Q9VTV1	M9PEZ4;Q9VTV1	-0.00659182	0.0346313
1547	M9PF14;M9PF20	M9PF14;M9PF20	0.0689604	0.0447056
1549	M9PFG7;M9PF24;P46824	M9PFG7;M9PF24;P46824	0.0485609	0.187347
1550	M9PF40;Q9VTE5	M9PF40;Q9VTE5	-0.400051	-0.266681
1551	Q9VT32;M9PF46;Q9VT33;M9PEY1;M9PEP5;M9PHW7	Q9VT32;M9PF46;Q9VT33;M9PEY1;M9PEP5;M9PHW7	-0.229785	-0.275657
1556	M9PF96;Q9VWC8	M9PF96;Q9VWC8	0.260199	0.302734
1560	M9PFF0;P41126	M9PFF0;P41126	-0.449334	-0.3609
1564	Q9VU51;M9PFH7	Q9VU51;M9PFH7	0.00757278	-0.135221
1571	M9PFM5;M9PFS6;P25439	M9PFM5;M9PFS6;P25439	0.168548	0.131002
1573	Q9VUX0;M9PFN0	Q9VUX0;M9PFN0	0.328177	0.41576
1575	Q8SXD5;M9PFQ2;Q0E8R1	Q8SXD5;M9PFQ2;Q0E8R1	-1.02566	-1.05724
1577	M9PFS8;Q9VVA0	M9PFS8;Q9VVA0	0.440354	0.511511
1579	M9PFT8;Q9VUY0	M9PFT8;Q9VUY0	0.152576	0.045385
1594	M9PG50;Q9VP22	M9PG50;Q9VP22	0.437637	0.318129
1598	M9PG76;P19889	M9PG76;P19889	-0.269279	-0.204852
1604	M9PGB8;O76896	M9PGB8;O76896	1.15061	1.44403
1606	M9PGD7;Q9W4R9	M9PGD7;Q9W4R9	-0.480418	-0.469252
1620	M9PGL2;Q95RC0	M9PGL2;Q95RC0	-0.0741233	-0.0663557
1627	M9PGS2;P20153	M9PGS2;P20153	1.69594	1.81404
1631	M9PH10;P46461	M9PH10;P46461	0.702866	0.8971
1632	M9PH13;Q9VYF2	M9PH13;Q9VYF2	-0.112347	-0.0304919
1638	M9PH73;Q24025	M9PH73;Q24025	0.190668	0.188351
1642	Q8T052;M9PHD8;Q07DP5	Q8T052;M9PHD8;Q07DP5	0.333679	0.0287421
1644	M9PHG0;M9PHY4;M9PHV3;M9PJQ3	M9PHG0;M9PHY4;M9PHV3;M9PJQ3	0.653679	0.772486
1647	M9PHK2;Q0KHQ5;Q8IQW6;M9NE33;M9PI11	M9PHK2;Q0KHQ5;Q8IQW6	-0.472196	-0.664422
1653	M9PHU7;M9PEU6;M9PBY3;M9PEK7;M9PF18	M9PHU7;M9PEU6;M9PBY3;M9PEK7;M9PF18	0.151162	0.118121
1660	Q9VWZ1;M9PHZ1	Q9VWZ1;M9PHZ1	0.66514	0.514247
1676	M9PIS3;P41572	M9PIS3;P41572	-0.0769689	-0.120951
1678	M9PJC7;P13709;M9PE02;E1JJJ8;M9PGM8	M9PJC7;P13709;M9PE02;E1JJJ8;M9PGM8	-0.103655	-0.227063
1680	Q86NK9;M9PJN5;M9NGF7;Q8IR38;Q8IR37;M9NEH6;Q9XYX1	Q86NK9;M9PJN5;M9NGF7;Q8IR38;Q8IR37;M9NEH6;Q9XYX1	0.165764	0.0920516
1681	M9PJN8;P07487;Q7JY07	M9PJN8;P07487	-0.894797	-0.853356
1687	X2JG23;O01939	X2JG23;O01939	-0.271433	-0.40561
1690	O02195	O02195	-0.115136	-0.16219
1691	O02373	O02373	-0.0250795	0.128992
1693	O15971	O15971	-0.707109	-0.471509
1694	O16043	O16043	-0.445388	-0.217196
1695	O16102	O16102	-0.586003	-0.59078
1697	O16130	O16130	-0.946041	-1.47982
1698	O16797	O16797	-0.529469	-0.487778
1699	O16810	O16810	-0.0528947	-0.166917
1703	O18332	O18332	-0.354195	-0.25541
1705	X2J5T3;O18334	X2J5T3;O18334	0.313054	0.450119
1707	O18336;Q86BK8	O18336;Q86BK8	-0.346772	-0.277828
1711	O18373	O18373	-0.364193	-0.437169
1713	O18404;D5A7S2	O18404	-0.459838	-0.594157
1714	O18405	O18405	-0.864814	-0.816115
1723	X2JAB9;O46037	X2JAB9;O46037	0.442668	0.45462
1726	O46050	O46050	-0.651854	-0.646623
1727	O46067	O46067	0.390161	0.479324
1742	O46342;A0A0B4K691;Q9VS73	O46342;A0A0B4K691	-0.0133992	-0.003793
1747	O61444	O61444	0.50337	0.445901
1748	O61491	O61491	-0.442128	-0.214176
1749	O61604;Q8IQZ8;Q8IQZ7	O61604;Q8IQZ8;Q8IQZ7	0.202598	0.238017
1753	O62526	O62526	1.54228	1.77286
1754	O62530	O62530	-0.475416	-0.400936
1756	O62602	O62602	0.149979	0.141132
1759	O62621	O62621	-0.0476984	0.0524009
1760	O76454	O76454	0.0762748	0.143544
1763	O76464	O76464	-0.0831686	-0.166385
1764	Q541C9;O76511	Q541C9;O76511	-0.00667564	-0.163422
1767	O76742	O76742	-0.404056	-0.328006
1781	O76922	O76922	-0.139472	-0.130246
1784	X2JG90;O76932	X2JG90;O76932	0.216128	0.117719
1792	O77266;Q960D4	O77266;Q960D4	-0.181394	-0.243363
1796	O77430;Q9VWC3	O77430	-0.312262	-0.219228
1797	O77434;M9PGI6	O77434;M9PGI6	0.0830443	0.157967
1801	O96299;O97479	O96299	-0.846558	-0.528082
1802	O96532	O96532	-0.108464	-0.232265
1804	O96553;A0A0B4K623	O96553;A0A0B4K623	-0.284118	-0.423127
1805	O96607;Q0E8S7;Q9VM94;M9PB54;M9PEX1	O96607;Q0E8S7;Q9VM94;M9PB54;M9PEX1	-0.283496	-0.393344
1806	X2JEB4;O96651	X2JEB4;O96651	-0.12675	-0.165768
1818	O97125	O97125	-2.05787	-1.67354
1819	O97132	O97132	-0.258899	-0.314408
1836	X2JGG6;P02517	X2JGG6;P02517	-0.23387	-0.153457
1838	P02572	P02572	-0.641401	-0.715901
1841	X2JD55;P02843	X2JD55;P02843	-0.331087	-0.344941
1842	X2JB25;P02844	X2JB25;P02844	-0.431607	-0.424866
1843	P04052	P04052	0.0065909	-0.0510419
1850	P05389	P05389	-0.457167	-0.611779
1852	X2JFG0;P05990	X2JFG0;P05990	0.369185	0.339003
1857	X2JEX8;P06607;Q4V566;Q9VPH3;M9NFL7	X2JEX8;P06607	-0.378944	-0.357113
1865	P08630	P08630	-0.124953	-0.197588
1866	P08646	P08646	-0.406185	-0.22283
1869	P09180	P09180	-0.496098	-0.465028
1873	P10351	P10351	0.821133	0.971812
1874	X2JGX8;P10734;P15370	X2JGX8;P10734	-0.75662	-0.548245
1875	X2JCP8;P10987	X2JCP8;P10987	-0.408677	-0.443694
1879	P11455;Q9VVQ2	P11455;Q9VVQ2	-0.0539378	-0.0462833
1887	P12646	P12646	-0.213922	-0.335095
1893	P13607;E1JIR4;A0A0B4KGG8	P13607;E1JIR4;A0A0B4KGG8	-0.304084	-0.308598
1895	P15007;E1JHR5	P15007;E1JHR5	-0.221077	-0.199262
1897	P15348	P15348	-0.196843	-0.164052
1902	P16912	P16912	-0.573027	-0.231785
1903	P17210	P17210	-0.109378	-0.0618687
1904	P17336;Q9VLI6	P17336	0.2323	0.126342
1908	P17917	P17917	-0.226631	-0.164383
1909	P18053;Q9VA12	P18053	-0.250808	-0.100782
1913	P18171;M9NG31	P18171;M9NG31	0.0971633	-0.152621
1914	P18475	P18475	0.226937	0.116855
1921	P19109	P19109	-0.273286	-0.266661
1929	P20348	P20348	-0.569204	-0.728115
1931	P20432	P20432	-1.05444	-1.16412
1935	X2JB60;P21461	X2JB60;P21461	-0.249524	0.0087888
1936	P21520	P21520	-0.292231	-0.456182
1937	P21914;Q9VWN3	P21914	-0.0107155	-0.00561654
1948	P23128	P23128	-0.34605	-0.278604
1949	Q8IMF5;P23226	Q8IMF5;P23226	-0.210783	-0.29081
1959	P25007;Q7K2I4	P25007	-0.560081	-0.544182
1961	P25028	P25028	1.67371	1.97039
1963	P25160	P25160	-0.180167	0.10334
1969	P25823;A0A0B4LG05	P25823;A0A0B4LG05	-0.0184387	0.116642
1979	P28668	P28668	-0.211504	-0.153896
1981	P29349;M9PGI1	P29349;M9PGI1	0.0172801	0.0774642
1982	Q53YH3;P29413	Q53YH3;P29413	-0.189689	-0.080919
1983	P29613	P29613	-0.444035	-0.471432
1985	X2JC31;P29742	X2JC31;P29742	-0.0582646	0.000498092
1991	P32234;REV__Q27591;REV__A0A0S0WGT1	P32234	-0.0596994	-0.0197043
1998	P35381	P35381	-0.566859	-0.584999
2016	P40794	P40794	0.343217	0.423108
2017	P40796	P40796	-0.0354679	-0.000828395
2018	P40797	P40797	-0.331896	-0.258628
2021	P41073	P41073	-0.267053	-0.316512
2022	P41093	P41093	-0.546439	-0.425268
2023	P41094	P41094	-0.283956	-0.202895
2027	P41964;Q9VZQ4	P41964	2.51209	0.883113
2030	P42283;A0A0B4KEI4;P42284;Q7KQZ4	P42283;A0A0B4KEI4	0.185117	0.00232487
2032	P42325	P42325	-0.476008	-0.376347
2035	P45437	P45437	-0.190043	-0.149337
2037	P45888	P45888	-0.038983	-0.0528064
2041	X2JCS6;P46223	X2JCS6;P46223	-0.532337	-0.459641
2042	P46415	P46415	0.211319	0.355355
2048	P48555	P48555	0.267625	0.360401
2052	P48604	P48604	-0.126852	-0.0655344
2053	P48607;A1Z0H7	P48607;A1Z0H7	1.29685	1.20431
2055	P48611	P48611	-0.543835	-0.527717
2056	P48612	P48612	0.908649	0.88827
2058	P49028	P49028	0.434004	0.338496
2060	P49657;X2JFM3;Q9VX06	P49657;X2JFM3;Q9VX06	0.247081	0.149107
2061	P49735	P49735	-0.245141	-0.330503
2062	P49846	P49846	0.374468	0.291252
2073	P52034;A0A0B4K7L1;A0A0B4KFI7	P52034;A0A0B4K7L1;A0A0B4KFI7	-0.260125	-0.330149
2086	P54353	P54353	0.0591953	-0.0516394
2087	P54356	P54356	0.718411	0.777111
2089	P54358	P54358	0.0707569	0.0276191
2092	P54385;Q8IMY1	P54385;Q8IMY1	-0.39533	-0.435744
2099	P55828	P55828	-0.459977	-0.43401
2100	P55830	P55830	-0.258989	-0.318375
2101	P55841	P55841	-0.103205	-0.180007
2129	P92177	P92177	-0.203814	-0.146096
2133	Q00449;E1JH49	Q00449;E1JH49	-1.23415	-0.474874
2135	Q02308	Q02308	0.134543	-0.0150154
2139	Q03427;A0A0B4KFY9	Q03427;A0A0B4KFY9	-0.0298009	-0.0384141
2140	X2JFR1;Q04047;Q8IR16	X2JFR1;Q04047;Q8IR16	-0.132319	-0.226972
2156	Q0E8E1;Q9I7R2	Q0E8E1;Q9I7R2	1.19834	0.83894
2162	Q0E8G6;Q9VSY2	Q0E8G6;Q9VSY2	0.356857	0.386889
2163	Q8IRB6;Q0E8H9	Q8IRB6;Q0E8H9	0.0683964	0.0833108
2166	Q0E8K6	Q0E8K6	-0.177073	-0.328763
2168	Q0E8N2;Q9V9Q6	Q0E8N2;Q9V9Q6	0.98408	0.632412
2169	Q0E8P1;Q9VIX6	Q0E8P1;Q9VIX6	0.354322	0.0781806
2172	Q0E8T6	Q0E8T6	0.765253	0.68556
2175	Q9W0Y5;Q0E8W1;Q8MMC6	Q9W0Y5;Q0E8W1;Q8MMC6	-0.0163278	-1.9688
2180	Q0E931	Q0E931	-0.692099	-0.788277
2185	Q0E993;A0A0B4KF06	Q0E993;A0A0B4KF06	0.24084	0.284989
2186	Q0E9A5;A0A0B4KFH1	Q0E9A5;A0A0B4KFH1	-0.076843	-0.0491892
2188	Q0E9B6;A1Z8U9	Q0E9B6;A1Z8U9	-0.559028	-0.550884
2192	Q0E9N4	Q0E9N4	-0.0378244	-0.201063
2203	Q0KHU5	Q0KHU5	-0.934647	-1.08982
2206	Q0KHZ6	Q0KHZ6	-0.231341	-0.261792
2208	Q0KI05	Q0KI05	-1.68656	-1.74687
2215	Q0KIB3	Q0KIB3	-0.0870006	-0.0803047
2217	Q0KIE7;M9PBV0;Q3KN55;Q9NCP8;M9PHP8	Q0KIE7	-0.0624796	-0.109949
2218	X2J8C3;Q10714	X2J8C3;Q10714	0.58421	0.56336
2219	Q1LZ08	Q1LZ08	0.0498327	0.0680278
2224	Q23972	Q23972	1.48134	1.4799
2225	Q23973	Q23973	-0.624671	-0.472214
2230	Q24039	Q24039	-0.32813	-0.57321
2232	Q24050	Q24050	-0.0410304	-0.161695
2233	T2FFI3;Q24087	T2FFI3;Q24087	-0.381491	-0.39442
2239	Q24145	Q24145	0.943134	0.8733
2243	Q24157	Q24157	-0.00552294	-0.039498
2247	Q24173;M9PEL6	Q24173;M9PEL6	0.0842098	0.218983
2264	Q24324;X2JAZ3;REV__CON__Q28107	Q24324;X2JAZ3	0.398227	0.404913
2266	Q24368	Q24368	-0.137061	-0.0870691
2267	Q24371	Q24371	0.365619	0.298125
2268	Q24372	Q24372	-0.273503	-0.361021
2269	X2JCV2;Q24388	X2JCV2;Q24388	1.02652	0.986637
2272	Q24439	Q24439	0.106286	0.182561
2273	Q24472	Q24472	0.119076	0.254018
2274	Q24478	Q24478	0.11159	0.0592679
2278	Q24558	Q24558	5.4555	5.52424
2286	Q27237;A0A0B4K7M9;D3DN23;Q7KVH7	Q27237;A0A0B4K7M9;D3DN23;Q7KVH7	-0.430042	-0.363563
2295	Q27869;A0A0B4KGK0	Q27869;A0A0B4KGK0	0.254155	0.0820625
2300	Q29QY7;Q86BG3	Q29QY7;Q86BG3	-1.09688	-1.00419
2303	Q2EZ47;A0A140SQB4	Q2EZ47;A0A140SQB4	0.0767744	0.0552701
2307	Q2PDU0	Q2PDU0	-0.511442	-0.887605
2309	Q2PDX2;M9PF23	Q2PDX2;M9PF23	0.267987	0.0498375
2310	Q2PE14	Q2PE14	0.407554	0.232645
2311	Q32KD2	Q32KD2	0.10753	0.077206
2312	Q32KD3;Q7KSW1;Q494I1;A0A0B4KGS8;Q9VHW9;A0A0B4KGF6	Q32KD3;Q7KSW1;Q494I1;A0A0B4KGS8;Q9VHW9;A0A0B4KGF6	-0.247887	-0.121733
2313	Q7KY08;Q32KD4	Q7KY08;Q32KD4	0.108804	0.00154324
2322	Q4QQ01	Q4QQ01	0.0409345	0.161882
2328	Q4U2Q5	Q4U2Q5	1.76388	1.8957
2330	Q4V429	Q4V429	0.176009	0.466539
2342	Q4V6M1	Q4V6M1	0.2695	0.359106
2345	Q500X4;A1Z9G3	Q500X4	-0.364613	-0.782762
2347	Q540Y4;Q9XYQ2	Q540Y4;Q9XYQ2	-0.726012	-0.475715
2349	Q59DP9;Q59DP8	Q59DP9;Q59DP8	-0.046917	0.0359884
2352	Q59E01;Q8IPM6;Q86BB1;Q95RI8	Q59E01;Q8IPM6;Q86BB1;Q95RI8	0.424405	0.140534
2363	Q5BIL9	Q5BIL9	1.18468	1.2656
2364	Q5EAK6	Q5EAK6	0.034608	0.0699369
2365	Q5LJP6;A4V2C3;Q5LJP5;M9PGA6	Q5LJP6;A4V2C3;Q5LJP5;M9PGA6	0.506338	0.608566
2370	Q5U0V7	Q5U0V7	0.348705	0.309542
2371	Q5U0X8	Q5U0X8	-0.212664	-0.270672
2372	Q5U117	Q5U117	-0.146301	-0.199232
2376	Q6AWN0	Q6AWN0	-0.420655	-0.521848
2377	Q6IDF5	Q6IDF5	-0.207546	-0.221446
2380	Q6IGN6	Q6IGN6	0.827398	1.09958
2382	Q6IGX8	Q6IGX8	-0.429248	-0.262063
2385	Q6IIA4	Q6IIA4	0.269977	0.179778
2388	Q6IL18	Q6IL18	0.301019	-0.0106302
2392	Q6NLJ9	Q6NLJ9	-0.189096	0.0284292
2394	Q6NN40	Q6NN40	0.50076	0.617927
2400	Q6NQY9	Q6NQY9	0.155432	0.0442625
2412	Q70PY2	Q70PY2	1.4894	1.13692
2419	Q7JQH9;Q9V3K9	Q7JQH9;Q9V3K9	0.138934	0.133848
2422	Q7JQR3	Q7JQR3	0.262405	0.206237
2423	Q7JQT9	Q7JQT9	0.084241	0.0529072
2424	Q7JQW6	Q7JQW6	0.0339958	-0.0228069
2433	Q7JR99	Q7JR99	-0.636526	-0.713907
2435	Q7JRC3	Q7JRC3	-0.357802	-0.180062
2440	Q86P32;Q7JRF1;Q7JY00	Q86P32;Q7JRF1;Q7JY00	0.854745	0.373823
2441	Q7JRH2;A0A0B4LG73	Q7JRH2	0.441929	0.34662
2442	Q7JRH5	Q7JRH5	0.244334	0.242454
2446	Q7JRM5	Q7JRM5	0.234323	0.0934956
2450	Q7JUN3	Q7JUN3	0.508422	0.854904
2451	Q7JUN9	Q7JUN9	-0.910628	-1.04326
2452	Q7JUS1	Q7JUS1	0.408105	0.338755
2455	Q7JUZ6;A8DYF7;A8WHG9	Q7JUZ6;A8DYF7;A8WHG9	-0.0529243	0.0766262
2458	Q7JV70	Q7JV70	-1.34329	-1.56542
2460	Q7JVG6	Q7JVG6	0.0798624	0.208571
2463	Q7JVI6	Q7JVI6	-0.184658	-0.106284
2465	Q7JVK6	Q7JVK6	1.82872	2.00288
2472	Q7JVX3;Q9VCM8	Q7JVX3;Q9VCM8	-0.293247	-0.259653
2473	Q7JVY2	Q7JVY2	0.223517	0.144013
2474	Q7JVZ8	Q7JVZ8	-0.274983	-0.253546
2476	Q7JW07	Q7JW07	-0.584365	-0.534312
2477	Q7JW27	Q7JW27	0.113626	-0.155991
2483	Q7JWF1	Q7JWF1	0.103712	0.102394
2494	Q7JWX3	Q7JWX3	0.147578	-0.169382
2495	Q7JX41	Q7JX41	-0.0491368	-0.0748723
2504	Q7JXE1	Q7JXE1	0.335763	-0.230119
2506	Q7JXF7	Q7JXF7	-0.298712	-0.202551
2508	Q7JXU4	Q7JXU4	0.781334	0.616066
2513	Q7JY94;A1ZBA9	Q7JY94;A1ZBA9	0.31436	0.360993
2514	Q7JY99	Q7JY99	0.488665	0.219056
2515	Q7JYH3	Q7JYH3	-1.80344	-1.57719
2520	Q7JYZ0	Q7JYZ0	0.0221711	-0.529245
2521	Q7JZ25	Q7JZ25	0.532661	0.642487
2522	Q7JZ37;Q7JRI4	Q7JZ37;Q7JRI4	-0.533701	-0.539294
2531	Q7JZK1	Q7JZK1	-0.46439	-0.382809
2543	Q7K0B6	Q7K0B6	-0.40126	-0.363392
2544	Q7K0D3	Q7K0D3	0.275602	0.187345
2548	Q7K0F7	Q7K0F7	-0.304206	-0.370374
2552	Q7K0L8	Q7K0L8	0.424626	0.533476
2553	Q7K0P0	Q7K0P0	0.539061	0.753342
2558	Q7K0W1	Q7K0W1	0.318009	0.372741
2563	Q7K110	Q7K110	-0.307135	-0.196492
2568	Q7K130	Q7K130	-0.152329	-0.232494
2569	Q7K148	Q7K148	-0.125345	-0.134645
2570	Q7K157	Q7K157	-1.29016	-1.12972
2572	Q7K172	Q7K172	0.219112	0.435054
2579	Q7K1H0	Q7K1H0	0.154468	0.0798918
2581	Q7K1M4	Q7K1M4	0.489351	0.657503
2583	Q7K1Q7	Q7K1Q7	-0.00870892	-0.181046
2587	Q7K1U0	Q7K1U0	-0.600032	-0.994908
2590	Q7K1W4	Q7K1W4	-1.03966	-1.20668
2592	Q7K1Y4	Q7K1Y4	-0.120644	-0.160326
2595	Q7K209	Q7K209	0.0534258	-0.0661771
2597	Q7K231	Q7K231	-0.312694	-0.196732
2599	Q7K275	Q7K275	-0.14274	-0.132279
2605	Q7K2G1	Q7K2G1	0.203914	0.385054
2608	Q7K2L1	Q7K2L1	0.114089	-0.0283175
2612	Q7K2Q8	Q7K2Q8	0.541107	0.650478
2617	Q7K2W6	Q7K2W6	0.221759	0.137718
2619	Q7K2X8	Q7K2X8	-0.0235781	-0.0343784
2621	Q7K332	Q7K332	0.205185	0.114556
2628	Q7K3M5	Q7K3M5	0.244466	0.305593
2632	Q7K3W2	Q7K3W2	0.104797	-0.0121142
2634	Q7K3Z3	Q7K3Z3	0.10802	0.105504
2638	Q7K486	Q7K486	0.284972	0.376702
2641	Q7K4B3	Q7K4B3	0.100805	0.182722
2646	Q7K4I5	Q7K4I5	0.25439	0.162366
2647	Q7K4J7	Q7K4J7	0.725001	0.463404
2648	Q7K4L8	Q7K4L8	0.253602	0.218687
2652	Q7K4P0	Q7K4P0	0.57397	0.164927
2657	Q7K4W1	Q7K4W1	0.193706	0.230538
2663	Q7K533	Q7K533	0.867058	0.628011
2664	Q7K549	Q7K549	-0.704232	-0.579149
2665	Q7K556;A8DYI2	Q7K556;A8DYI2	-0.139247	-0.114684
2666	Q7K561	Q7K561	0.727938	0.866038
2667	Q7K566	Q7K566	-0.362024	-0.134816
2668	Q7K569	Q7K569	-0.864543	-0.974233
2671	Q7K5K3	Q7K5K3	-0.120091	-0.172149
2673	Q7K5M2;A0A0B4LFE1	Q7K5M2;A0A0B4LFE1	0.0614745	-0.213138
2674	Q7K5M6	Q7K5M6	0.147704	0.159817
2676	Q7K738	Q7K738	0.477239	0.533434
2684	Q7KB18	Q7KB18	-0.146043	0.0211173
2685	Q7KBL8	Q7KBL8	-0.148058	-0.259535
2692	Q7KK51	Q7KK51	-0.0898146	-0.0728688
2694	Q7KK90	Q7KK90	-0.296375	-0.127135
2698	Q7KKI0;A1Z8U4	Q7KKI0;A1Z8U4	-0.374281	-0.36279
2700	Q7KLG8	Q7KLG8	0.127382	0.107239
2709	Q7KMJ6	Q7KMJ6	-0.152221	-0.268133
2719	Q7KN75	Q7KN75	-0.333032	-0.312052
2723	Q7KN99;E2QD26	Q7KN99;E2QD26	-0.430733	-0.578637
2730	Q7KQM6;REV__A0A0B4KG49	Q7KQM6	0.101563	-0.0248742
2736	Q961V3;Q7KRU0;A0A0B4KHW7	Q961V3;Q7KRU0;A0A0B4KHW7	-0.185483	-0.306369
2737	Q7KRU8;Q8I0T0	Q7KRU8;Q8I0T0	-0.433378	-0.388504
2738	Q7KRW4;Q9VAP0	Q7KRW4;Q9VAP0	0.513503	0.633437
2739	Q7KRW8	Q7KRW8	-0.0378737	-0.10089
2745	Q7KSE0;Q9VEC4	Q7KSE0;Q9VEC4	-0.251156	-0.383559
2748	Q7KSN8;Q9VGG9	Q7KSN8;Q9VGG9	0.0721249	0.0473509
2750	Q7KSQ0	Q7KSQ0	0.411646	0.43489
2752	Q9VHK5;Q7KSU3	Q9VHK5;Q7KSU3	1.60093	1.8274
2763	Q9I7N0;Q7KTC7;Q7KTD0;Q7KTC8;Q7KTC3;Q7KTC1;Q7KTC9;Q7KTC6;Q7KTC5;Q7KTC2;Q7KTB9;Q7KTB8;Q9VK56;Q7KTC0;A0A0S0WIA2	Q9I7N0;Q7KTC7;Q7KTD0;Q7KTC8;Q7KTC3;Q7KTC1;Q7KTC9;Q7KTC6;Q7KTC5;Q7KTC2;Q7KTB9;Q7KTB8;Q9VK56;Q7KTC0;A0A0S0WIA2	-0.026562	0.00374166
2764	Q7KTG0	Q7KTG0	0.305057	0.272754
2765	Q7KTG2	Q7KTG2	0.499634	0.523328
2771	Q9VM57;Q7KTL4;Q7KTL5;Q9VES4	Q9VM57;Q7KTL4;Q7KTL5	0.545094	0.52491
2772	Q95SI0;Q8IPK9;Q7KTP1;Q9VMT1	Q95SI0;Q8IPK9;Q7KTP1;Q9VMT1	0.399015	0.33963
2773	Q7KTP4;E1JHT9;Q9VMW2;Q9VMW4	Q7KTP4;E1JHT9;Q9VMW2;Q9VMW4	-0.47886	-0.569913
2777	Q7KTS4	Q7KTS4	0.252615	0.179375
2782	Q7KTW5	Q7KTW5	-0.304695	-0.373586
2783	Q7KTW9	Q7KTW9	-0.046681	-0.153737
2784	Q7KTX7	Q7KTX7	0.554996	0.571415
2786	Q7KTZ2;M9PAY7	Q7KTZ2	-0.361828	-0.452237
2788	Q7KU06	Q7KU06	-0.317252	-0.344991
2792	Q7KUD4;Q9VT60	Q7KUD4;Q9VT60	0.102703	-0.00947651
2795	Q7KUR6;Q9VVM0	Q7KUR6;Q9VVM0	0.0213306	-0.209792
2800	Q7KUZ2	Q7KUZ2	-0.98199	-1.16553
2803	Q7KV27;Q9VYD9	Q7KV27;Q9VYD9	-0.101972	-0.0196586
2805	Q7KV90;Q9W002;M9PBJ7;Q7KV89;Q7KV88;M9PH19	Q7KV90;Q9W002;M9PBJ7;Q7KV89;Q7KV88;M9PH19	0.172494	0.123155
2810	Q7KVB1	Q7KVB1	0.0427288	0.121762
2812	Q7KVF6	Q7KVF6	0.578814	0.640263
2815	Q7KVP5;B7YZM3;B7YZM4;B7YZM5;Q9W2I0;E1JGQ4;B7YZM6;Q7KVP6;B7YZM7	Q7KVP5;B7YZM3;B7YZM4;B7YZM5;Q9W2I0;E1JGQ4;B7YZM6;Q7KVP6;B7YZM7	0.711375	0.648931
2817	Q7KVQ0	Q7KVQ0	-0.0559883	0.0652932
2821	Q9W4C4;Q7KVW1	Q9W4C4;Q7KVW1	0.41683	0.287485
2822	Q7KVW2	Q7KVW2	-0.124911	0.0357899
2825	Q7KW39	Q7KW39	-0.450905	-0.474957
2834	Q7PLE9;Q7PLE8	Q7PLE9;Q7PLE8	1.20621	1.20156
2837	Q7PLI2;E1JGX3;A0A0B4KF23	Q7PLI2;E1JGX3;A0A0B4KF23	0.279308	0.339605
2839	Q7PLK0	Q7PLK0	-0.0872996	-0.0123602
2841	Q7PLL6;D2A6J9	Q7PLL6	0.186514	0.199951
2843	Q7PLS8	Q7PLS8	0.423594	0.423543
2845	Q7YTY6	Q7YTY6	0.035955	-0.150787
2846	Q7YU01;A8JRC4;A8JRC7;A0A0B4KH38;Q9VBN2;Q7YTZ6;Q86B77;A0A0B4KGZ9;Q6NN57	Q7YU01;A8JRC4;A8JRC7;A0A0B4KH38;Q9VBN2;Q7YTZ6;Q86B77;A0A0B4KGZ9	0.900859	0.942497
2848	Q7YU24	Q7YU24	-0.221225	-0.309442
2849	Q7YU88;X2JIP7;X2JAP1;Q9W3X2;G2J613	Q7YU88;X2JIP7;X2JAP1;Q9W3X2	1.9998	1.78722
2851	Q7YZ99;Q9W0B0;A8JNI2;Q86BP9;X2J8K5	Q7YZ99;Q9W0B0;A8JNI2	0.307403	0.366752
2856	Q86B44;Q1RL06;X2JCE7;Q9VX03	Q86B44;Q1RL06	-0.311113	-0.549035
2861	Q86B87;A0A0B4K6B8;A0A0B4K7A6;A0A0B4JDE0	Q86B87;A0A0B4K6B8;A0A0B4K7A6	-0.14371	-0.227485
2863	Q86BA5;Q9I7K5	Q86BA5;Q9I7K5	0.454249	0.418548
2866	Q86BL4;REV__Q9VTM7	Q86BL4	-0.0294932	-0.199683
2867	Q86BM0;REV__Q7PLK1	Q86BM0	1.16133	1.15728
2872	Q86BP6;Q9VUZ2	Q86BP6;Q9VUZ2	0.463289	0.418808
2878	Q86BY9	Q86BY9	-0.0819719	-0.111067
2881	Q86P36;A0A0B4KED8;A0A0B4KEC6	Q86P36	0.407667	0.248432
2883	Q86PD3	Q86PD3	-0.159433	-0.091058
2884	Q8I050	Q8I050	-0.526544	-0.57147
2885	Q8I077	Q8I077	0.163227	0.028218
2886	Q8I079	Q8I079	0.790516	0.348575
2894	Q8I725	Q8I725	0.032734	0.0295703
2914	Q8IMR4;Q9VBC5;Q8IMR3	Q8IMR4;Q9VBC5;Q8IMR3	-0.84932	-0.816636
2930	Q8IN43	Q8IN43	0.71964	0.471768
2931	Q8IN44	Q8IN44	1.84933	1.68705
2939	Q8INE8;Q9VFB3	Q8INE8;Q9VFB3	-0.0688929	-0.0955715
2946	Q8INH7	Q8INH7	0.103843	0.00273762
2948	Q8INK7;Q9VGQ2;A0A0B4K6E6	Q8INK7;Q9VGQ2	-0.790839	-0.513734
2950	Q8INL3	Q8INL3	0.085223	-0.00334259
2952	Q8INU6	Q8INU6	-1.73432	-3.64707
2954	Q8INX3	Q8INX3	0.1664	0.0305168
2962	Q8IP73	Q8IP73	-0.264315	-0.486501
2966	Q8IPA1;Q8IP99	Q8IPA1;Q8IP99	0.0314376	-0.204252
2974	Q8IPF5	Q8IPF5	0.0268437	0.231336
2981	Q9VNC0;Q8IPQ6	Q9VNC0;Q8IPQ6	-0.0667241	-0.217963
2984	Q8IPT1;Q8IPT0	Q8IPT1;Q8IPT0	-0.559235	-0.490587
2985	Q9VPB3;Q8IPU3	Q9VPB3;Q8IPU3	-0.588451	-0.585829
2996	Q8IQ82;Q8IQ80	Q8IQ82;Q8IQ80	0.804374	1.22037
3015	Q8IQQ4	Q8IQQ4	-1.14417	-1.27736
3019	Q8IQW2;Q9VWD1	Q8IQW2;Q9VWD1	-0.100998	-0.226127
3026	Q8IR45	Q8IR45	0.293659	-0.0240449
3031	Q8IR95	Q8IR95	-0.669155	-0.557904
3034	Q8IRD1	Q8IRD1	0.314658	0.457951
3037	Q9VZQ9;Q8IRD5	Q9VZQ9;Q8IRD5	-0.599375	-0.48676
3038	Q8IRD6	Q8IRD6	1.50124	1.36161
3040	Q8IRE4	Q8IRE4	-0.0650762	-0.209546
3041	Q8IRG6	Q8IRG6	-0.113527	-0.121411
3047	Q8IRL9;Q9W2Z4	Q8IRL9;Q9W2Z4	-0.466494	-0.484277
3053	X2JHT0;Q8IRY7	X2JHT0;Q8IRY7	-0.0322838	-0.190468
3056	Q8MKJ6	Q8MKJ6	0.346237	0.514088
3062	Q8ML70	Q8ML70	1.92455	0.890845
3066	Q8MLQ5;A0A0B4LHE0;Q9W1G6;Q9W1G5;Q8MKK5;A0A0B4LGD3	Q8MLQ5;A0A0B4LHE0;Q9W1G6;Q9W1G5;Q8MKK5;A0A0B4LGD3	-0.0708363	0.100926
3068	Q8MLS1	Q8MLS1	1.13719	0.84592
3072	Q8MLW2;Q9NDJ2;A0A0B4LFX8	Q8MLW2;Q9NDJ2;A0A0B4LFX8	0.188823	0.247617
3077	Q8MMC4	Q8MMC4	1.40906	0.746132
3090	Q8MRI4	Q8MRI4	0.274479	0.185366
3093	Q8MRT7	Q8MRT7	0.328936	0.486855
3094	Q8MRW1	Q8MRW1	0.514514	0.468588
3098	Q8MS69	Q8MS69	-0.269776	-0.365971
3099	Q8MSB1	Q8MSB1	0.12769	0.220142
3106	Q8MSS7	Q8MSS7	0.446989	0.375511
3109	Q8MSV2	Q8MSV2	0.0303813	0.162274
3114	Q8MT06	Q8MT06	0.309759	0.0732588
3115	Q8MT18;A8JRB8;A8JRC1	Q8MT18;A8JRB8;A8JRC1	0.0731848	-0.036136
3120	Q8MUJ1	Q8MUJ1	1.90229	1.84509
3121	X2JEA3;Q8MV48	X2JEA3;Q8MV48	0.0822736	0.0182503
3124	Q8MYL1	Q8MYL1	0.478277	0.657198
3126	Q8MYY7;M9PB89	Q8MYY7;M9PB89	-0.456034	-0.252367
3127	Q8MZ22	Q8MZ22	-1.34395	-1.20328
3128	Q8MZ28	Q8MZ28	-0.941452	-0.768967
3129	Q8MZI3;Q7KU78	Q8MZI3;Q7KU78	0.509933	0.476688
3136	Q8SWS7	Q8SWS7	0.356122	0.24385
3138	Q8SWV6	Q8SWV6	0.660937	0.935796
3144	Q8SWX6;A0A0B4KHU4;Q8IMU2	Q8SWX6;A0A0B4KHU4;Q8IMU2	1.16146	1.24652
3156	Q8SX81	Q8SX81	0.343457	0.476801
3158	Q8SX89	Q8SX89	0.325888	0.191553
3161	Q8SXB9	Q8SXB9	1.64813	1.55346
3163	Q8SXF0	Q8SXF0	0.4523	0.384026
3168	Q8SXM8;Q9W327	Q8SXM8;Q9W327	-0.123387	-0.0997325
3172	Q9W185;Q8SXR7	Q9W185;Q8SXR7	-0.988203	-1.33896
3175	Q8SXU0	Q8SXU0	0.300029	0.255257
3184	Q8SY33	Q8SY33	0.377468	0.312872
3187	Q8SY58	Q8SY58	-0.607547	-0.610407
3192	Q8SYG2	Q8SYG2	-0.0735495	0.00830195
3201	Q8SYQ8	Q8SYQ8	0.128532	0.172088
3211	Q8SZ87	Q8SZ87	0.853952	1.17326
3213	Q8SZB7	Q8SZB7	-0.224277	-0.142576
3214	Q8SZN1;A0A0B4KHI6	Q8SZN1;A0A0B4KHI6	0.084264	-0.309912
3217	Q8SZY7	Q8SZY7	-0.0751784	-0.145348
3221	Q8T014;Q9VZU9;Q6NLL3	Q8T014;Q9VZU9;Q6NLL3	0.496558	0.783102
3238	Q8T0N5	Q8T0N5	-0.276677	-0.39292
3242	Q8T0V2;Q7KVN1;Q9I7V7;Q9I7V6	Q8T0V2;Q7KVN1;Q9I7V7;Q9I7V6	0.3564	0.385828
3243	Q8T389;Q8SYD9;A8DYJ0;A8DYJ1	Q8T389;Q8SYD9;A8DYJ0;A8DYJ1	-0.1305	-0.203262
3250	Q8T4A9	Q8T4A9	0.289853	0.291802
3252	Q8T4C9	Q8T4C9	-1.28689	-1.68852
3257	Q8T626	Q8T626	-0.12443	-0.216277
3267	Q94513	Q94513	0.575362	0.363621
3270	Q94517	Q94517	0.123478	0.171159
3272	Q94524	Q94524	-0.110346	-0.0698896
3275	Q94529	Q94529	0.572494	0.375367
3293	Q95RE4;M9NFR5	Q95RE4;M9NFR5	0.735625	0.497519
3300	Q95RP1	Q95RP1	0.51175	0.57388
3302	Q95RQ7	Q95RQ7	0.908262	0.821461
3303	Q95RQ8;Q9W1N1	Q95RQ8;Q9W1N1	-0.0120539	-0.156121
3304	Q95RR1;M9PD88	Q95RR1;M9PD88	0.60631	0.397738
3308	Q95RU0	Q95RU0	0.459732	0.28852
3317	Q95SI7	Q95SI7	-0.299961	-0.281775
3318	Q95SK3	Q95SK3	-0.0342141	0.124233
3319	Q95SS8	Q95SS8	-0.0506723	0.198363
3325	Q95TA3;Q8IG84	Q95TA3;Q8IG84	0.0394451	0.178653
3328	Q9VXI3;Q95TL8	Q9VXI3;Q95TL8	-0.0156923	0.0698506
3331	Q95TP0	Q95TP0	-0.247068	-0.291658
3334	Q9VKD8;Q95TU2	Q9VKD8;Q95TU2	0.852626	0.914539
3335	Q95U30	Q95U30	-0.431484	-0.636692
3337	Q95U34	Q95U34	0.21694	0.255883
3338	Q95U54	Q95U54	0.304506	0.393863
3344	Q960E4;A1ZBT6	Q960E4;A1ZBT6	0.276221	0.355482
3348	Q960M4	Q960M4	-0.0258838	0.0963951
3356	Q960X8	Q960X8	0.31968	0.327452
3359	X2JCB6;Q961B3	X2JCB6;Q961B3	-0.211465	-0.300085
3377	X2JFC3;Q9GQN0;M9MSN9;M9MS57;M9MSD3;M9MSB0	X2JFC3;Q9GQN0;M9MSN9;M9MS57;M9MSD3;M9MSB0	0.277341	0.222058
3378	Q9GQN5;A0A0B4LHR3	Q9GQN5;A0A0B4LHR3	-0.326837	-0.246495
3383	Q9GYU8	Q9GYU8	0.105309	0.0741087
3388	Q9I7K0	Q9I7K0	-0.0513546	-0.196522
3391	Q9I7L8;E1JHM5	Q9I7L8;E1JHM5	-0.0122804	-0.146056
3392	Q9Y168;Q9I7L9	Q9Y168;Q9I7L9	-0.599138	-0.519135
3393	Q9I7M2	Q9I7M2	-0.000813115	0.00122726
3397	Q9I7P8	Q9I7P8	-0.22158	-0.400988
3404	Q9I7W2	Q9I7W2	0.739136	0.635693
3406	Q9I7W5	Q9I7W5	0.837447	0.540746
3407	Q9I7X6	Q9I7X6	0.124976	0.126504
3408	Q9I7Z8	Q9I7Z8	0.276263	0.530296
3409	Q9N2M8;A0A0B4KI61;Q8IMI6	Q9N2M8;A0A0B4KI61	0.680201	0.301013
3411	Q9NBD7	Q9NBD7	0.618821	0.650491
3418	Q9NGC3	Q9NGC3	0.820681	0.926777
3419	Q9NGX9	Q9NGX9	-0.812567	-0.930395
3424	Q9NIV1;A0A0B4KGJ5;A0A0B4KG56	Q9NIV1;A0A0B4KGJ5;A0A0B4KG56	0.262682	0.114422
3427	Q9TVQ5	Q9TVQ5	0.401947	0.148168
3428	Q9U1H9	Q9U1H9	0.293405	0.331893
3430	Q9U3V9	Q9U3V9	0.323912	0.346662
3437	Q9U616	Q9U616	-1.02758	-0.353048
3439	Q9U6R9	Q9U6R9	-0.378961	-0.315689
3444	Q9U9Q1	Q9U9Q1	-0.277916	-0.226404
3445	Q9U9Q2	Q9U9Q2	-0.338013	-0.363849
3448	Q9V333;A0A0B4K7U3	Q9V333;A0A0B4K7U3	0.515005	0.465346
3450	Q9V393	Q9V393	-0.551637	-0.595379
3452	Q9V397	Q9V397	0.846731	0.628906
3453	Q9V3A4	Q9V3A4	-1.04806	-0.904938
3455	Q9V3A7	Q9V3A7	-0.348248	-0.341157
3459	Q9V3C0	Q9V3C0	-0.22545	-0.102873
3464	Q9V3C8	Q9V3C8	0.261024	0.111152
3467	Q9V3D4;D4G7B1	Q9V3D4;D4G7B1	-0.53221	-0.430233
3469	Q9V3D9	Q9V3D9	0.323396	0.404144
3470	Q9V3E3	Q9V3E3	0.651748	0.645689
3478	Q9V3G1	Q9V3G1	-0.72341	-0.697347
3492	Q9V3N1	Q9V3N1	0.167755	-0.0658556
3494	Q9V3N6	Q9V3N6	6.66388	6.80918
3498	Q9V3Q4	Q9V3Q4	-0.420413	-0.221089
3499	Q9V3Q6;X2JFZ3	Q9V3Q6	0.947116	0.987301
3507	Q9V3U0	Q9V3U0	-1.47269	-0.179706
3514	Q9V3V9	Q9V3V9	-0.242534	-0.1953
3515	Q9V3W0	Q9V3W0	-0.0364943	0.111503
3517	Q9V3W2	Q9V3W2	-0.496721	-0.499216
3522	Q9V3Y2	Q9V3Y2	0.172813	0.17501
3527	Q9V3Z2	Q9V3Z2	-0.0861558	-0.424495
3528	Q9V3Z4	Q9V3Z4	0.126553	0.163782
3532	Q9V414	Q9V414	0.0886098	0.266054
3534	Q9V420	Q9V420	0.0570096	0.225442
3536	Q9V428	Q9V428	-0.358756	-0.484425
3538	Q9V431	Q9V431	-0.303209	-0.138008
3547	X2J4W8;Q9V447	X2J4W8;Q9V447	-0.639921	-0.62112
3548	Q9V451	Q9V451	0.463509	-0.093927
3554	Q9V463	Q9V463	-0.10094	-0.0682546
3557	Q9V470	Q9V470	-0.243085	-0.235327
3561	Q9V491;H9XVP3;Q0KIF1	Q9V491;H9XVP3;Q0KIF1	-0.0210433	0.0241451
3563	Q9V493;Q7KQM8	Q9V493;Q7KQM8	0.220825	0.349008
3565	Q9V4C8	Q9V4C8	0.138818	0.0818555
3567	Q9V4D9;Q8IMC4	Q9V4D9;Q8IMC4	0.113222	-0.174797
3575	Q9V4N3	Q9V4N3	0.602509	0.741553
3576	Q9V4P1;Q8T0J3	Q9V4P1	0.612349	0.459416
3577	Q9V4Q8	Q9V4Q8	0.0366329	0.0049447
3581	Q9V521	Q9V521	0.648595	0.457873
3584	Q9V574	Q9V574	0.277325	0.458638
3585	Q9V595	Q9V595	0.301027	0.212495
3587	Q9V5C6	Q9V5C6	-0.507244	-0.405239
3592	X2JCL6;Q9VWE9;Q9V668	X2JCL6;Q9VWE9;Q9V668	1.73596	1.69607
3593	Q9V677	Q9V677	0.378453	0.501053
3594	Q9V6B9	Q9V6B9	-0.237674	-0.354824
3595	Q9V6G5;A0A0B4JD45	Q9V6G5;A0A0B4JD45	0.158305	0.333333
3607	Q9V7Y2	Q9V7Y2	-0.0974942	-0.0565994
3613	Q9V8Y2	Q9V8Y2	0.699841	1.11737
3628	Q9V9T4	Q9V9T4	0.0338091	-0.011151
3632	Q9V9U4	Q9V9U4	0.0565379	0.112462
3637	Q9V9W2;Q9V9W3	Q9V9W2;Q9V9W3	-0.851851	-0.861856
3638	Q9V9W4	Q9V9W4	0.419443	0.634988
3639	Q9V9W7	Q9V9W7	0.234627	0.225119
3640	Q9V9W8	Q9V9W8	-0.132191	-0.186477
3642	Q9V9X8;A0A0B4KHX7	Q9V9X8;A0A0B4KHX7	-0.257688	-0.335839
3647	Q9VA00	Q9VA00	0.252486	0.146679
3651	Q9VA41;Q8IMH5	Q9VA41;Q8IMH5	-0.432496	-0.730416
3655	Q9VA79	Q9VA79	-0.0211053	-0.105302
3671	Q9VAD6	Q9VAD6	-0.266906	-0.247065
3675	Q9VAG5	Q9VAG5	0.0821248	0.215401
3679	Q9VAH9	Q9VAH9	-0.228798	-0.124308
3682	Q9VAI4	Q9VAI4	0.706276	0.719155
3684	Q9VAJ1	Q9VAJ1	0.0667592	0.0259758
3685	Q9VAJ2	Q9VAJ2	-0.354756	-0.427248
3690	Q9VAL1	Q9VAL1	-0.274379	-0.514409
3696	Q9VAN6	Q9VAN6	-0.0893875	-0.209484
3697	Q9VAN7	Q9VAN7	-0.280754	-0.333969
3698	Q9VAN8	Q9VAN8	-0.455354	-0.308924
3700	Q9VAP2	Q9VAP2	0.393111	0.348456
3707	Q9VAQ8	Q9VAQ8	-0.253476	-0.388445
3713	Q9VAV2	Q9VAV2	0.295785	0.298503
3715	Q9VAW3;A8Y5A1	Q9VAW3	0.387395	0.591081
3716	Q9VAX8	Q9VAX8	0.126551	0.147594
3717	Q9VAX9	Q9VAX9	0.359119	0.0708946
3719	Q9VAY2	Q9VAY2	-0.190451	-0.256711
3725	Q9VAZ0	Q9VAZ0	0.381121	0.197832
3731	Q9VB10	Q9VB10	0.166544	0.0545453
3735	Q9VB22	Q9VB22	0.238946	0.119551
3736	Q9VB23	Q9VB23	0.340996	0.282909
3744	Q9VB64	Q9VB64	-0.110323	-0.00018095
3749	Q9VB96;A0A0B4K6I6	Q9VB96;A0A0B4K6I6	-0.429625	-0.390564
3753	Q9VBB3	Q9VBB3	-0.255785	-0.130347
3760	Q9VBH7	Q9VBH7	-0.0221393	-0.183444
3766	Q9VBI4;Q7KRZ3	Q9VBI4;Q7KRZ3	0.101147	0.113375
3769	Q9VBN5	Q9VBN5	-0.627583	-0.561711
3771	Q9VBP2	Q9VBP2	0.564662	0.824974
3772	Q9VBP5;Q9VIM6	Q9VBP5	0.264429	0.148814
3779	Q9VBR0	Q9VBR0	1.37113	1.43829
3786	Q9VBU5	Q9VBU5	-0.22553	-0.0757135
3790	Q9VBV5	Q9VBV5	0.143853	0.220469
3798	Q9VBX7	Q9VBX7	0.295407	0.402761
3799	Q9VBX8	Q9VBX8	0.397892	0.272651
3800	Q9VBY2	Q9VBY2	0.0312375	-0.16403
3803	Q9VBY7	Q9VBY7	0.332944	0.21154
3813	Q9VC08	Q9VC08	0.55987	0.47526
3814	Q9VC10	Q9VC10	-0.0875782	-0.171353
3816	Q9VC20;Q9VC19	Q9VC20;Q9VC19	0.511466	0.285676
3819	Q9VC40	Q9VC40	-0.129585	-0.0641437
3820	Q9VC45	Q9VC45	-0.0310667	-0.0131273
3824	Q9VC52	Q9VC52	0.460077	0.454987
3834	Q9VC87	Q9VC87	0.161862	0.0773821
3837	Q9VC96	Q9VC96	0.308198	0.12017
3843	Q9VCC0	Q9VCC0	-0.44674	-0.402696
3844	Q9VCC2	Q9VCC2	-0.203263	-0.122474
3845	Q9VCC3	Q9VCC3	0.42701	0.634435
3846	Q9VCC4	Q9VCC4	0.389358	0.559212
3852	Q9VCD9	Q9VCD9	-0.018381	0.130593
3853	Q9VCE0	Q9VCE0	0.15908	0.110499
3856	Q9VCE6	Q9VCE6	-0.108024	-0.0438329
3858	Q9VCF1	Q9VCF1	-0.509262	-0.484424
3861	Q9VCG0	Q9VCG0	0.213675	-0.0963742
3862	Q9VCG4	Q9VCG4	-0.0264698	-0.0818225
3874	Q9VCK1	Q9VCK1	0.0406913	-0.325822
3875	Q9VCK2	Q9VCK2	0.704734	0.826721
3876	Q9VCK6	Q9VCK6	-0.146154	-0.25295
3878	Q9VCN4	Q9VCN4	0.726138	0.985721
3879	Q9VCN6	Q9VCN6	0.170411	0.180086
3883	Q9VCQ7	Q9VCQ7	0.604245	0.434579
3884	Q9VCR2;Q8T490	Q9VCR2	-0.121053	-0.109299
3888	Q9VCU6	Q9VCU6	-0.233719	-0.361805
3890	Q9VCU8	Q9VCU8	0.139304	-0.10597
3894	Q9VCW1	Q9VCW1	0.836702	1.35358
3897	Q9VCX1;Q8IN00;D5A7N8;A0A0B4K7N2	Q9VCX1;Q8IN00;D5A7N8;A0A0B4K7N2	0.290029	0.0854934
3902	Q9VCY1	Q9VCY1	0.0309495	-0.129652
3906	Q9VD02	Q9VD02	0.453363	0.548183
3910	Q9VD14	Q9VD14	0.308662	0.362727
3911	Q9VD22	Q9VD22	0.745798	1.07844
3914	Q9VD48	Q9VD48	2.75338	1.97246
3920	Q9VD66	Q9VD66	-0.337907	-0.615088
3922	Q9VD81	Q9VD81	-0.0034889	0.289043
3927	Q9VDC3	Q9VDC3	0.382621	0.123176
3928	Q9VDC8	Q9VDC8	-0.187908	-0.0153989
3934	Q9VDD8	Q9VDD8	0.577022	0.573021
3935	Q9VDD9	Q9VDD9	1.79332	1.77762
3937	Q9VDE3;A0A0B4KHK1	Q9VDE3;A0A0B4KHK1	0.0246027	0.1885
3938	Q9VDE4	Q9VDE4	-0.053729	-0.0458263
3939	Q9VDE5	Q9VDE5	0.103565	-0.175551
3946	Q9VDI3	Q9VDI3	0.609489	0.307525
3952	Q9VDL0	Q9VDL0	-0.0229047	-0.0513929
3955	Q9VDL4	Q9VDL4	-0.679653	-0.599361
3965	Q9VDR7	Q9VDR7	-0.105559	-0.221637
3967	Q9VDS9;Q7KSB7	Q9VDS9;Q7KSB7	0.339174	0.277833
3970	Q9VDT5	Q9VDT5	0.184229	0.249607
3973	Q9VDV2	Q9VDV2	0.203835	0.184855
3974	Q9VDV3	Q9VDV3	0.00334446	-0.0903771
3977	Q9VDY1	Q9VDY1	0.297888	0.387998
3980	Q9VDZ1;A0A0B4KHR2	Q9VDZ1;A0A0B4KHR2	-0.464444	-0.545335
3981	Q9VDZ4	Q9VDZ4	-0.0252717	-0.245506
3982	Q9VDZ8;Q9VDZ7	Q9VDZ8;Q9VDZ7	0.444949	0.480673
3983	Q9VE00;Q9VE01	Q9VE00	-2.50668	-3.46606
3986	Q9VE09	Q9VE09	0.131498	0.187897
3990	Q9VE18	Q9VE18	-0.164061	-0.316292
3999	Q9VE75	Q9VE75	-0.282264	-0.42767
4002	Q9VE94	Q9VE94	-0.247442	-0.021337
4003	Q9VE96	Q9VE96	1.68332	1.41574
4004	Q9VE98	Q9VE98	0.0365975	-0.00186672
4008	Q9VEA5	Q9VEA5	-0.0654896	-0.209901
4009	Q9VEA6	Q9VEA6	0.0715826	-0.112449
4013	Q9VEB3	Q9VEB3	-0.00508097	-0.0144597
4017	Q9VEC1	Q9VEC1	0.180898	0.104765
4022	Q9VED7	Q9VED7	0.965855	0.945607
4023	Q9VED8	Q9VED8	-0.411311	-0.23376
4024	Q9VEE9	Q9VEE9	0.119972	0.0238562
4027	Q9VEG6	Q9VEG6	-0.0788976	-0.159544
4035	Q9VEK7;Q8IN97	Q9VEK7;Q8IN97	0.411821	0.297549
4038	Q9VEM0	Q9VEM0	-0.338027	-0.562185
4063	Q9VEX5	Q9VEX5	0.226863	0.15882
4068	Q9VEZ5	Q9VEZ5	0.0754655	0.0524026
4069	Q9VF02	Q9VF02	0.0164566	-0.0418625
4073	Q9VF14	Q9VF14	0.121171	0.0623486
4077	Q9VF26	Q9VF26	0.00794858	-0.00975954
4078	Q9VF27	Q9VF27	-0.373513	-0.338964
4079	Q9VF28	Q9VF28	0.112839	0.234687
4083	Q9VF51	Q9VF51	-0.4499	-0.45591
4084	Q9VF53	Q9VF53	-0.114083	-0.234494
4085	Q9VF56	Q9VF56	0.187884	0.161748
4086	Q9VF70	Q9VF70	-0.187658	0.0127012
4087	Q9VF77	Q9VF77	1.70348	1.94685
4093	Q9VF87	Q9VF87	0.236932	0.236864
4096	Q9VF98	Q9VF98	0.926954	1.00285
4106	Q9VFD0	Q9VFD0	-2.78057	-3.50041
4108	Q9VFE4;A0A0B4K683	Q9VFE4;A0A0B4K683	0.0216616	-0.0683272
4117	Q9VFI3	Q9VFI3	-1.481	-1.50319
4126	Q9VFP2	Q9VFP2	0.468544	0.590672
4127	Q9VFP5	Q9VFP5	-0.115835	-0.216729
4128	Q9VFP6	Q9VFP6	-0.0742441	-0.428499
4133	Q9VFS8	Q9VFS8	-0.229997	-0.223311
4134	Q9VFT4	Q9VFT4	0.0674398	-0.0356592
4137	Q9VFV8	Q9VFV8	0.0392335	-0.0479469
4146	Q9VG01	Q9VG01	-0.735136	-0.769666
4147	Q9VG04	Q9VG04	-0.240464	-0.416462
4148	Q9VG06	Q9VG06	-0.244858	-0.522375
4149	Q9VG07	Q9VG07	0.206956	0.0827485
4151	Q9VG13	Q9VG13	0.909093	0.704089
4153	Q9VG31;Q9VG32;Q2QBM1	Q9VG31;Q9VG32;Q2QBM1	0.282972	0.353992
4156	Q9VG45	Q9VG45	0.0658189	0.137532
4158	Q9VG59	Q9VG59	0.387593	0.399195
4161	Q9VG62	Q9VG62	0.985791	0.772897
4166	Q9VG80;Q8SWX8	Q9VG80;Q8SWX8	-0.220802	-0.115653
4167	Q9VG81	Q9VG81	0.376148	0.306723
4168	Q9VG84	Q9VG84	1.94828	1.97689
4170	Q9VG96	Q9VG96	-0.28008	-0.800457
4171	Q9VG97	Q9VG97	-1.14725	-1.18752
4173	Q9VGA0	Q9VGA0	-0.874667	-1.16294
4174	Q9VGA4	Q9VGA4	0.16228	0.177101
4176	Q9VGC2	Q9VGC2	-0.968487	-1.11001
4180	Q9VGE4	Q9VGE4	0.149613	0.253775
4183	Q9VGF1	Q9VGF1	-1.52661	-2.07897
4184	Q9VGF3	Q9VGF3	-0.367818	-0.647392
4185	Q9VGF5	Q9VGF5	-0.837747	-0.708206
4188	Q9VGF9	Q9VGF9	0.0548939	-0.0933158
4189	Q9VGG5	Q9VGG5	-0.526701	-0.626572
4190	Q9VGH0	Q9VGH0	0.00089903	-0.0736216
4193	Q9VGI8	Q9VGI8	0.145864	0.26927
4194	Q9VGJ9	Q9VGJ9	-0.102167	0.0933234
4195	Q9VGK3	Q9VGK3	-0.330775	-0.311622
4198	Q9VGM2;Q8INK3;Q8INK2	Q9VGM2;Q8INK3;Q8INK2	-0.560597	-0.549097
4202	Q9VGN9	Q9VGN9	0.0262426	-0.226923
4203	Q9VGP0	Q9VGP0	0.400068	0.565181
4209	Q9VGQ1	Q9VGQ1	-0.110811	-0.0231989
4213	Q9VGR2	Q9VGR2	0.0505355	-0.064898
4215	Q9VGS9	Q9VGS9	-1.15355	-1.65906
4216	Q9VGT3	Q9VGT3	-0.480179	-0.511249
4237	Q9VH13	Q9VH13	-0.358536	-0.381441
4242	Q9VH37	Q9VH37	-0.741344	-0.746716
4248	Q9VH64	Q9VH64	0.177518	0.308675
4249	Q9VH65;A0A0B4KFJ0	Q9VH65;A0A0B4KFJ0	0.042	-0.0672288
4251	Q9VH76	Q9VH76	-0.0447161	0.0480141
4254	Q9VH79	Q9VH79	0.00107448	0.751314
4265	Q9VHB3	Q9VHB3	-0.122349	-0.00893707
4267	Q9VHB6;A0A0B4KGL6	Q9VHB6;A0A0B4KGL6	0.0442136	0.0868455
4276	Q9VHD3	Q9VHD3	1.09447	1.35489
4277	Q9VHE3	Q9VHE3	0.669383	0.754793
4278	Q9VHE4	Q9VHE4	-0.226316	-0.237426
4280	Q9VHF4;A0A0B4KGY1	Q9VHF4;A0A0B4KGY1	-0.137726	-0.235262
4281	Q9VHF6;Q8T0L6	Q9VHF6;Q8T0L6	0.712217	0.927826
4282	Q9VHG1	Q9VHG1	-0.121945	-0.0430318
4283	Q9VHG4	Q9VHG4	0.266179	0.206848
4289	Q9VHH7	Q9VHH7	-0.529711	-0.525624
4290	Q9VHH8	Q9VHH8	0.177896	0.0427627
4293	Q9VHI4	Q9VHI4	-0.12768	-0.249072
4295	Q9VHI8;Q8INP8;Q8INP9	Q9VHI8;Q8INP8;Q8INP9	0.127867	0.0798618
4298	Q9VHJ4	Q9VHJ4	-0.373539	-0.429094
4302	Q9VHK6	Q9VHK6	0.093921	0.202533
4310	Q9VHN0	Q9VHN0	-0.186355	0.401641
4319	Q9VHR5	Q9VHR5	-0.353185	-0.206813
4324	Q9VHT2	Q9VHT2	0.0601832	-0.026911
4325	Q9VHT3	Q9VHT3	-0.0822664	0.071919
4331	Q9VHV6;A0A0B4LGT9	Q9VHV6;A0A0B4LGT9	0.387623	0.229105
4333	Q9VHW0	Q9VHW0	0.4936	0.562501
4334	Q9VHW4	Q9VHW4	0.146727	0.201464
4343	Q9VHY6	Q9VHY6	-0.228906	-0.177749
4345	Q9VI04	Q9VI04	-2.15339	-2.4315
4350	Q9VI53	Q9VI53	-0.601479	-0.72593
4352	Q9VI56	Q9VI56	-0.281402	-0.312479
4368	Q9VID7	Q9VID7	-0.453976	-0.346427
4375	Q9VIF0	Q9VIF0	0.702678	0.894819
4383	Q9VIH3	Q9VIH3	0.305321	0.414015
4385	X2J9A5;Q9VII9	X2J9A5;Q9VII9	-0.292302	-0.420848
4386	Q9VIJ5	Q9VIJ5	0.283497	0.535568
4390	Q9VIK6	Q9VIK6	0.488394	0.381494
4392	Q9VIL0	Q9VIL0	0.544896	0.69767
4394	Q9VIM0	Q9VIM0	-0.753753	-0.706396
4398	Q9VIP0	Q9VIP0	0.0578007	0.124717
4403	Q9VIP9	Q9VIP9	0.105595	0.0801753
4405	Q9VIQ5	Q9VIQ5	-0.447507	-1.38854
4407	Q9VIQ8	Q9VIQ8	-0.251651	-0.354282
4409	Q9VIR9;M9PG97	Q9VIR9;M9PG97	0.68181	0.448878
4411	Q9VIS4	Q9VIS4	0.213278	0.156904
4413	Q9VIT3	Q9VIT3	0.00437083	-0.117725
4414	Q9VIU4	Q9VIU4	-0.243916	0.104868
4419	Q9VIV6	Q9VIV6	0.0714433	0.0613179
4425	Q9VIX4	Q9VIX4	2.02245	2.05155
4426	Q9VIX7;Q8INW9	Q9VIX7;Q8INW9	-0.333725	-0.45574
4429	Q9VIZ2	Q9VIZ2	-0.146613	0.103408
4433	Q9VJ08	Q9VJ08	0.412656	0.250364
4437	Q9VJ14	Q9VJ14	-0.104494	-0.127086
4441	Q9VJ28	Q9VJ28	-0.64238	-0.627528
4443	Q9VJ30;Q7KT38;X2J946	Q9VJ30;Q7KT38;X2J946	-0.573141	-0.30677
4448	Q9VJ39	Q9VJ39	0.178988	0.293814
4449	Q9VJ43	Q9VJ43	0.365782	0.39661
4450	Q9VJ44	Q9VJ44	1.31422	1.4147
4451	Q9VJ45	Q9VJ45	-0.946545	-1.10663
4452	Q9VJ57	Q9VJ57	0.0855213	0.0108715
4453	Q9VJ58	Q9VJ58	0.0157138	0.0704105
4460	Q9VJ74	Q9VJ74	0.152765	0.146161
4461	Q9VJ75	Q9VJ75	-0.157993	-0.0979374
4462	Q9VJ77;X2JEK7;X2JAA3	Q9VJ77;X2JEK7;X2JAA3	0.342106	0.504792
4464	Q9VJ86	Q9VJ86	0.0972698	0.113842
4470	Q9VJD4	Q9VJD4	-0.271146	-0.27082
4477	Q9VJH2	Q9VJH2	0.125188	0.109112
4480	Q9VJI9	Q9VJI9	-0.100378	-0.168982
4491	Q9VJQ6	Q9VJQ6	-0.0877901	-0.28348
4497	X2JE06;Q9VJY6	X2JE06;Q9VJY6	-0.682175	-0.633382
4500	Q9VJZ1	Q9VJZ1	-0.336093	-0.220091
4502	Q9VJZ4	Q9VJZ4	-0.3809	-0.356261
4506	Q9VK04	Q9VK04	-0.0920275	-0.149929
4510	Q9VK20	Q9VK20	0.157007	0.0707401
4517	Q9VK39	Q9VK39	1.9252	1.4406
4519	Q9VK43	Q9VK43	0.00513444	-0.310404
4520	Q9VK44	Q9VK44	0.18998	0.24954
4521	Q9VK45;M9PFS0	Q9VK45;M9PFS0	0.152078	0.15652
4525	Q9VK58	Q9VK58	0.210866	0.0237471
4531	Q9VK89	Q9VK89	-0.171331	-0.346227
4532	Q9VK90;M9PBA6	Q9VK90;M9PBA6	0.471008	0.37735
4536	Q9VKB4	Q9VKB4	0.277939	0.0954743
4537	Q9VKB9	Q9VKB9	0.345163	0.224383
4538	Q9VKC1	Q9VKC1	-0.13257	-0.356373
4539	Q9VKC2	Q9VKC2	-0.45846	-0.306848
4542	Q9VKC8	Q9VKC8	0.000215697	-0.0369134
4555	Q9VKH9;X2J5P0;REV__A0A0B4LG74	Q9VKH9;X2J5P0	-0.350674	-0.440765
4560	X2J9F3;Q9VKJ3	X2J9F3;Q9VKJ3	-0.0237494	0.0311847
4561	Q9VKJ4	Q9VKJ4	0.0563902	-0.413298
4568	X2J7U0;Q9VKM1	X2J7U0;Q9VKM1	-0.243677	-0.325003
4572	Q9VKM7	Q9VKM7	0.1402	0.190973
4577	Q9VKQ0;B7YZV0	Q9VKQ0;B7YZV0	0.808197	0.839844
4581	Q9VKR0	Q9VKR0	-0.00693589	-0.012156
4588	Q9VKV1	Q9VKV1	0.378223	0.581033
4589	Q9VKV4	Q9VKV4	0.0686055	-0.125933
4593	Q9VKW1	Q9VKW1	-0.223979	-0.168023
4602	Q9VKZ7	Q9VKZ7	0.182082	0.260323
4606	Q9VL01	Q9VL01	0.87202	1.2519
4608	Q9VL06	Q9VL06	0.413221	0.556202
4612	Q9VL16	Q9VL16	0.0193617	0.0464823
4613	Q9VL18	Q9VL18	0.0837255	0.168168
4615	Q9VL21	Q9VL21	1.36202	1.25941
4618	Q9VL25	Q9VL25	-0.38845	-0.37227
4626	Q9VL66	Q9VL66	0.561988	0.83076
4627	Q9VL67	Q9VL67	0.695066	0.582946
4629	Q9VL69	Q9VL69	0.329182	0.418882
4632	Q9VL72	Q9VL72	0.405336	0.313096
4640	Q9VLA6	Q9VLA6	0.214766	-0.0255703
4641	Q9VLB7	Q9VLB7	-0.375046	-0.356665
4643	X2J5D8;Q9VLC1;B9EQY2	X2J5D8;Q9VLC1;B9EQY2	-1.18025	-1.0787
4644	Q9VLC5	Q9VLC5	-0.160935	-0.146178
4646	Q9VLI9	Q9VLI9	0.645029	0.736165
4649	Q9VLJ5	Q9VLJ5	1.2681	1.22658
4651	Q9VLK0	Q9VLK0	-1.43824	-1.17673
4654	Q9VLL0;X2J591	Q9VLL0	-0.436904	-0.649525
4656	Q9VLL5	Q9VLL5	0.527935	0.518813
4657	Q9VLM5	Q9VLM5	-0.201547	-0.156665
4659	Q9VLM7	Q9VLM7	0.347563	0.434697
4664	Q9VLN6;Q9VJ21	Q9VLN6	-0.156085	-0.146542
4665	Q9VLP3	Q9VLP3	0.249342	0.237889
4666	Q9VLP5	Q9VLP5	-1.47898	-1.3409
4669	Q9VLP9	Q9VLP9	0.189008	0.348181
4670	Q9VLQ1	Q9VLQ1	0.00298763	0.15248
4684	X2J564;Q9VLT1	X2J564;Q9VLT1	0.418115	0.495279
4686	Q9VLT7	Q9VLT7	-0.0929695	0.0495917
4687	Q9VLT8	Q9VLT8	0.117831	-0.0414687
4688	X2JDI9;Q9VLU3	X2JDI9;Q9VLU3	-0.624344	-0.862507
4689	Q9VLU4	Q9VLU4	-0.0186228	-0.502561
4690	X2J7F1;Q9VLU5	X2J7F1;Q9VLU5	0.0876484	-0.181082
4693	Q9VLV6	Q9VLV6	3.09964	0.898666
4697	Q9VLY9;Q8IPH5;Q8IPH4;Q9VLZ0	Q9VLY9;Q8IPH5;Q8IPH4;Q9VLZ0	0.424503	0.175434
4700	Q9VM14;Q7KTK9;M9PCG1;M9PCU4;M9PCA2	Q9VM14;Q7KTK9;M9PCG1;M9PCU4;M9PCA2	-0.0590272	-0.0606109
4706	Q9VM45	Q9VM45	0.358323	0.480273
4711	Q9VM58	Q9VM58	-0.475586	-0.307243
4712	Q9VM60	Q9VM60	-0.0026187	0.0630954
4719	Q9VM95	Q9VM95	0.44007	0.400349
4722	Q9VMA7;X2J786	Q9VMA7;X2J786	0.103617	0.0276801
4723	Q9VMB3	Q9VMB3	-1.02735	-1.10107
4725	Q9VMB9	Q9VMB9	-0.561716	-0.584355
4726	Q9VMC3	Q9VMC3	-0.251991	-0.233491
4727	Q9VMC6	Q9VMC6	0.159222	-0.0179287
4732	Q9VMD5	Q9VMD5	-0.0398127	0.316529
4733	Q9VME5	Q9VME5	0.549819	0.556793
4734	Q9VMH2	Q9VMH2	0.53463	0.660627
4735	Q9VMH4	Q9VMH4	0.0496266	-0.0893817
4750	Q9VMM2;X2J9G3	Q9VMM2	2.38645	2.51366
4760	Q9VMR0	Q9VMR0	0.413684	0.499547
4761	Q9VMR6	Q9VMR6	0.397332	0.430336
4765	Q9VMU0	Q9VMU0	-0.0769659	-0.23392
4766	Q9VMU2	Q9VMU2	-0.508284	-0.579214
4767	Q9VMU6	Q9VMU6	3.04322	3.10168
4771	Q9VMW1	Q9VMW1	1.32015	2.08198
4772	Q9VMW7	Q9VMW7	0.483216	0.639712
4775	Q9VMX1	Q9VMX1	-0.193957	-0.141096
4780	Q9VMY3	Q9VMY3	-0.345468	-0.519765
4781	Q9VMY9	Q9VMY9	0.301709	0.323014
4801	Q9VN88	Q9VN88	1.52938	1.36466
4802	Q9VN93;D3PK81	Q9VN93	-0.0252843	0.0147943
4805	Q9VNA4;Q59E06	Q9VNA4;Q59E06	-0.748227	-0.657727
4806	Q9VNA5	Q9VNA5	-0.0838242	-0.207151
4811	Q9VND3;Q8I0B7	Q9VND3;Q8I0B7	0.665803	0.601782
4813	Q9VND7	Q9VND7	-0.11669	-0.0675233
4820	Q9VNE9;A0A0B4KFM7	Q9VNE9	-0.601198	-0.574361
4829	Q9VNG2	Q9VNG2	-0.139856	-0.321872
4832	Q9VNH5	Q9VNH5	-0.0901984	-0.118646
4835	Q9VNI4	Q9VNI4	0.561127	0.617145
4838	Q9VNI9	Q9VNI9	1.08402	0.839166
4843	Q9VNR2;C1C5A0;Q8IPS6;A8JNX2;M9PG15	Q9VNR2;C1C5A0;Q8IPS6;A8JNX2;M9PG15	-0.345294	-0.198106
4844	Q9VNR6	Q9VNR6	0.251242	0.278966
4845	Q9VNR7;A8E6R2	Q9VNR7;A8E6R2	-1.21784	-0.742491
4847	Q9VNR9;M9PDB7	Q9VNR9	-0.646191	-0.716018
4850	Q9VNV3	Q9VNV3	-0.042608	0.0511288
4851	Q9VNW0	Q9VNW0	-0.497519	-0.289168
4852	Q9VNW1	Q9VNW1	0.239438	0.307517
4853	Q9VNW2	Q9VNW2	-0.789556	-0.995242
4854	Q9VNW8	Q9VNW8	0.121844	0.359341
4856	Q9VNX1	Q9VNX1	0.0130199	0.242289
4859	Q9VNX9	Q9VNX9	0.853099	0.50145
4871	Q9VP46;M9PIF1	Q9VP46;M9PIF1	0.145798	0.139974
4873	Q9VP50;M9PFV4	Q9VP50;M9PFV4	-0.379237	-0.481692
4875	Q9VP57	Q9VP57	-0.146827	-0.236005
4893	Q9VPD5	Q9VPD5	0.719867	0.737915
4896	Q9VPE2	Q9VPE2	-0.0751328	-0.120302
4899	Q9VPF1	Q9VPF1	0.270841	0.223822
4901	Q9VPF6	Q9VPF6	0.119484	0.208984
4904	Q9VPH2	Q9VPH2	-0.0608416	-0.00200606
4907	Q9VPI8	Q9VPI8	0.290462	0.166276
4908	Q9VPI9	Q9VPI9	0.0650104	0.164789
4910	Q9VPJ9;Q8IPV3	Q9VPJ9;Q8IPV3	0.184904	0.0376051
4912	Q9VPK7	Q9VPK7	0.110298	0.191675
4913	Q9VPL0	Q9VPL0	-0.0568303	-0.173679
4915	Q9VPL5	Q9VPL5	0.246456	0.175351
4920	Q9VPN5	Q9VPN5	-0.136826	-0.0675918
4924	Q9VPQ7	Q9VPQ7	-1.00731	-0.831166
4926	Q9VPR3	Q9VPR3	-0.0319304	0.0162532
4938	Q9VPW8	Q9VPW8	0.270542	0.118796
4941	Q9VPX4	Q9VPX4	-0.0283666	-0.360387
4942	Q9VPX5	Q9VPX5	-0.0827094	-0.185658
4948	Q9VPY7	Q9VPY7	-0.296875	-0.445153
4950	Q9VQ26	Q9VQ26	0.423772	0.442468
4954	Q9VQ35	Q9VQ35	0.248743	0.266339
4955	Q9VQ39	Q9VQ39	-0.375776	-0.367417
4956	Q9VQ54;Q0E8U6;A8DYT1;M9PBP2;M9NE65	Q9VQ54;Q0E8U6;A8DYT1;M9PBP2;M9NE65	0.0691738	0.123409
4958	Q9VQ60	Q9VQ60	0.126897	0.319806
4959	Q9VQ61;Q8IPY3	Q9VQ61;Q8IPY3	-0.242198	-0.243705
4963	Q9VQ78	Q9VQ78	-0.169061	-0.104381
4965	Q9VQ88	Q9VQ88	1.30443	1.33427
4970	Q9VQB4	Q9VQB4	0.807371	0.823927
4973	Q9VQD4	Q9VQD4	-0.144874	0.0887887
4974	Q9VQD6	Q9VQD6	1.0891	1.0217
4979	Q9VQF7	Q9VQF7	-0.889651	-0.740524
4989	Q9VQJ8	Q9VQJ8	-0.0143823	0.116329
4991	Q9VQK5	Q9VQK5	0.243252	0.351421
4995	Q9VQL1	Q9VQL1	-0.268187	-0.144452
4999	Q9VQM4	Q9VQM4	-0.0858115	-0.108143
5007	Q9VQR8	Q9VQR8	-0.215277	-0.129193
5008	Q9VQR9	Q9VQR9	0.124325	0.199788
5012	Q9VQT7	Q9VQT7	0.144375	-0.163946
5027	Q9VR04	Q9VR04	0.107081	0.437006
5028	Q9VR05	Q9VR05	-0.372456	-0.709506
5030	Q9VR17	Q9VR17	0.0675585	0.167696
5032	Q9VR29	Q9VR29	0.626301	0.629144
5033	Q9VR30	Q9VR30	0.115438	0.0999697
5035	Q9VR33	Q9VR33	1.19203	0.874901
5038	Q9VR44	Q9VR44	-0.275483	0.234989
5043	Q9VR57;Q8IQ25	Q9VR57;Q8IQ25	0.164152	0.0423037
5044	X2JEN2;Q9VR59;X2JCY0;X2JG41;X2JGE9;X2JLN4	X2JEN2;Q9VR59;X2JCY0;X2JG41;X2JGE9;X2JLN4	0.329423	0.261162
5046	Q9VR62	Q9VR62	0.373916	0.367772
5049	Q9VR90	Q9VR90	0.26779	0.0816127
5053	Q9VRA0	Q9VRA0	0.377759	-0.0309055
5054	Q9VRA1;Q8T921	Q9VRA1;Q8T921	0.645824	0.571733
5056	X2JGA6;Q9VRB3	X2JGA6;Q9VRB3	-0.568394	-0.26988
5060	Q9VRE0	Q9VRE0	0.103713	0.131578
5063	Q9VRG7;X2JCV6;X2JEK6	Q9VRG7;X2JCV6;X2JEK6	-1.05613	-0.972709
5065	Q9VRH6	Q9VRH6	-0.467145	-0.487386
5067	Q9VRI9	Q9VRI9	-0.0332873	0.00813995
5068	Q9VRJ0	Q9VRJ0	1.04778	0.890903
5069	Q9VRJ1	Q9VRJ1	0.23611	0.323173
5072	Q9VRJ5	Q9VRJ5	0.789338	0.81642
5076	Q9VRL1;Q8IQ53	Q9VRL1;Q8IQ53	-0.278548	-0.415889
5084	Q9VRP2	Q9VRP2	-0.367127	-0.314386
5085	Q9VRP3	Q9VRP3	-0.552644	-0.499782
5090	Q9VRQ4	Q9VRQ4	1.12127	1.01906
5092	Q9VRQ9	Q9VRQ9	-0.114743	-0.214402
5102	Q9VRX1	Q9VRX1	-0.0929539	0.0278826
5106	Q9VRY5	Q9VRY5	-0.287911	-0.164827
5113	Q9VS37	Q9VS37	0.829619	0.737003
5117	Q9VS47	Q9VS47	-0.796891	-0.977008
5122	Q9VS57	Q9VS57	-0.0349742	0.0881698
5123	Q9VS60	Q9VS60	0.0942379	0.493995
5126	Q9VS84	Q9VS84	-0.78528	-0.108637
5130	Q9VSB9	Q9VSB9	-0.35625	-0.374618
5136	Q9VSD7	Q9VSD7	-0.200742	-0.0712823
5138	Q9VSE2	Q9VSE2	-0.0635512	0.173093
5139	Q9VSE6	Q9VSE6	0.0370215	0.0505452
5140	Q9VSE8	Q9VSE8	-0.130662	-0.270725
5149	Q9VSI1	Q9VSI1	0.101313	0.125323
5151	Q9VSJ8	Q9VSJ8	0.545731	0.441898
5153	Q9VSK4	Q9VSK4	-0.235038	-0.300388
5155	Q9VSK9	Q9VSK9	0.053363	0.0972533
5157	Q9VSL2	Q9VSL2	-0.61861	-0.00414947
5158	Q9VSL4	Q9VSL4	0.0312956	0.102391
5162	Q9VSL9	Q9VSL9	-0.245419	-0.322434
5169	Q9VSR5	Q9VSR5	0.0202082	0.133295
5172	Q9VSS2	Q9VSS2	0.0479162	0.133618
5175	Q9VSU2;E1JI93	Q9VSU2;E1JI93	-0.96335	-1.57221
5176	Q9VSU6	Q9VSU6	0.276811	0.268262
5179	Q9VSW5;M9PF35	Q9VSW5;M9PF35	0.262025	0.0936232
5184	Q9VSY8	Q9VSY8	-0.0268146	-0.236677
5198	Q9VT29	Q9VT29	-0.184786	-0.379281
5200	Q9VT39	Q9VT39	-1.04225	-0.966316
5216	Q9VTD9	Q9VTD9	0.0919299	-0.0357603
5217	Q9VTE0	Q9VTE0	-0.311112	0.000852326
5220	Q9VTE6	Q9VTE6	0.0754414	0.222204
5222	Q9VTF8	Q9VTF8	-0.0646987	-0.129879
5227	Q9VTH1	Q9VTH1	0.111718	0.132481
5232	Q9VTL1	Q9VTL1	0.353832	0.444013
5233	Q9VTL5	Q9VTL5	-0.388904	-0.477965
5239	Q9VTN7	Q9VTN7	0.0580173	0.151723
5240	Q9VTP1	Q9VTP1	0.525087	0.32415
5243	Q9VTS3	Q9VTS3	0.770421	0.790609
5248	Q9VTU0	Q9VTU0	1.38156	1.65696
5251	Q9VTU4	Q9VTU4	0.00391216	0.0968722
5254	Q9VTV4	Q9VTV4	-0.606609	-0.282653
5256	Q9VTW1;X2JB05;Q9VTW0;X2JGL7	Q9VTW1;X2JB05;Q9VTW0;X2JGL7	0.288339	0.393347
5258	Q9VTX1	Q9VTX1	0.396101	0.290975
5261	Q9VTY5	Q9VTY5	0.448526	0.197371
5268	Q9VTZ7	Q9VTZ7	-0.313097	-0.271684
5272	X2JCD3;Q9VU13	X2JCD3;Q9VU13	0.0530291	-0.00664186
5276	Q9VU35	Q9VU35	-0.263606	-0.281622
5280	Q9VU43	Q9VU43	-0.440438	-0.2251
5282	Q9VU59	Q9VU59	0.869678	1.14607
5287	Q9VU76;M9PFE5;M9PFI2;Q961X4	Q9VU76;M9PFE5;M9PFI2;Q961X4	0.463278	0.29418
5289	Q9VU84	Q9VU84	0.715199	0.565716
5299	Q9VUB9	Q9VUB9	-0.478134	-0.438417
5301	Q9VUC4	Q9VUC4	-0.0836482	-0.29336
5303	Q9VUE5;M9PI58	Q9VUE5;M9PI58	1.59275	1.54763
5307	Q9VUH6	Q9VUH6	-0.560381	-0.583263
5310	Q9VUI8;M9NE98	Q9VUI8;M9NE98	-0.469026	-0.471097
5313	Q9VUK8	Q9VUK8	0.0396453	0.0497154
5314	X2JCY2;Q9VUL1	X2JCY2;Q9VUL1	-0.0250879	-0.127644
5319	Q9VUM3	Q9VUM3	0.282855	0.471224
5322	Q9VUQ5;M9PFK7;REV__O97365	Q9VUQ5;M9PFK7	0.156846	0.239642
5325	Q9VUR0	Q9VUR0	0.441143	0.328891
5330	Q9VUR7	Q9VUR7	-0.736644	-0.6304
5334	Q9VUU8;Q9VUU7	Q9VUU8;Q9VUU7	0.762557	0.496819
5337	Q9VUV9	Q9VUV9	0.0690798	0.0564624
5349	Q9VV39	Q9VV39	0.281442	0.484149
5352	Q9VV47	Q9VV47	-0.703125	-0.789562
5353	Q9VV49	Q9VV49	0.452157	0.693629
5354	Q9VV52	Q9VV52	-0.200182	-0.270337
5356	Q9VV60	Q9VV60	0.257908	0.265084
5357	Q9VV61	Q9VV61	0.261961	0.33006
5358	Q9VV72	Q9VV72	0.137817	0.118295
5363	Q9VV79	Q9VV79	0.177522	0.0877836
5364	Q9VV83	Q9VV83	0.925032	0.935454
5365	Q9VV87	Q9VV87	0.559796	0.289779
5369	Q9VVA4;M9PCU8	Q9VVA4	-0.000220314	-0.0429101
5384	Q9VVG4	Q9VVG4	-0.239543	-0.124257
5386	Q9VVG9	Q9VVG9	0.782997	0.0642179
5388	Q9VVH3	Q9VVH3	-0.688343	-0.647887
5396	Q9VVK7	Q9VVK7	-0.199278	-0.0499204
5407	Q9VVN7	Q9VVN7	0.939161	0.946148
5410	Q9VVR2	Q9VVR2	0.0233161	-0.0796715
5411	Q9VVR6	Q9VVR6	0.736892	0.708813
5417	Q9VVT6	Q9VVT6	-0.514661	-0.407207
5418	Q9VVU1	Q9VVU1	-0.570576	-0.610416
5421	Q9VVU5	Q9VVU5	-0.144842	-0.0422245
5428	Q9VVW8	Q9VVW8	0.743653	0.758745
5431	Q9VVX5	Q9VVX5	-0.244106	-0.17756
5435	Q9VW10	Q9VW10	-0.315542	-0.260849
5436	X2JGV8;Q9VW12	X2JGV8;Q9VW12	0.588503	0.659502
5437	Q9VW13	Q9VW13	0.140428	0.0741293
5440	Q9VW22	Q9VW22	0.437141	0.311028
5446	Q9VW45;M9PFY4	Q9VW45	0.110634	0.327523
5447	Q9VW47;M9NDW3	Q9VW47	0.167668	0.43684
5455	Q9VW68	Q9VW68	0.0727399	0.251425
5460	Q9VW84	Q9VW84	-0.445204	-0.350071
5461	Q9VWA2	Q9VWA2	0.610088	0.661259
5465	Q9VWB8;Q8IQV9	Q9VWB8;Q8IQV9	-0.0224051	-0.0406938
5473	Q9VWD9	Q9VWD9	0.220627	0.11034
5474	Q9VWE0	Q9VWE0	0.369326	0.246831
5481	Q9VWF5;M9PI14	Q9VWF5;M9PI14	0.299392	0.0650939
5483	Q9VWG0	Q9VWG0	-0.700584	-0.877095
5488	Q9VWI0	Q9VWI0	0.107035	-0.0120423
5490	Q9VWI3	Q9VWI3	0.643835	0.623106
5492	Q9VWJ3	Q9VWJ3	-0.124108	-0.0642972
5493	Q9VWJ4	Q9VWJ4	0.19054	0.144749
5495	Q9VWJ9	Q9VWJ9	0.346529	0.303336
5496	Q9VWK5	Q9VWK5	0.242642	0.10396
5500	Q9VWN4;X2JFQ1;X2JG10	Q9VWN4;X2JFQ1;X2JG10	0.790487	0.54811
5505	Q9VWP2	Q9VWP2	0.210189	0.240017
5511	Q9VWQ6	Q9VWQ6	0.279627	0.101354
5515	Q9VWS1	Q9VWS1	-0.0249329	0.0714235
5517	Q9VWS7	Q9VWS7	-0.391443	-0.351759
5523	Q9VWV6	Q9VWV6	2.13592	1.63853
5525	Q9VWW3;Q7KUV8	Q9VWW3;Q7KUV8	-0.0445251	-0.515996
5526	Q9VWY6	Q9VWY6	0.492402	0.325032
5529	Q9VX02	Q9VX02	0.832747	0.776473
5530	Q9VX08	Q9VX08	-0.0304182	-0.229088
5532	Q9VX12	Q9VX12	-0.461767	-0.269061
5537	Q9VX24	Q9VX24	0.161307	-0.0758472
5544	Q9VX38	Q9VX38	2.00393	1.61394
5548	Q9VX63	Q9VX63	0.44446	0.645694
5549	Q9VX69	Q9VX69	-1.30328	-1.39886
5556	Q9VX95	Q9VX95	-0.0579096	-0.227875
5560	Q9VXA8	Q9VXA8	-0.0311967	-0.214523
5565	Q9VXB5	Q9VXB5	0.378198	0.40724
5570	Q9VXE5	Q9VXE5	0.0727542	-0.0710413
5572	Q9VXE9	Q9VXE9	0.181627	0.166852
5575	X2JKP3;Q9VXG0	X2JKP3;Q9VXG0	0.596936	0.424761
5581	Q9VXH4	Q9VXH4	0.707338	0.446622
5582	Q9VXH7	Q9VXH7	0.46303	0.447191
5584	Q9VXI1	Q9VXI1	-0.0400238	0.250201
5589	Q9VXK7	Q9VXK7	-0.367394	-0.359625
5597	Q9VXN2	Q9VXN2	-0.903113	-1.20682
5601	Q9VXP3	Q9VXP3	-0.00650729	-0.109469
5602	Q9VXP4	Q9VXP4	-0.0230724	-0.0257025
5604	Q9VXQ2;X2JDY8	Q9VXQ2;X2JDY8	-0.104092	0.105332
5605	Q9VXQ3	Q9VXQ3	-0.450341	-0.599165
5608	Q9VXQ8	Q9VXQ8	-0.217459	-0.334311
5614	Q9VXT0	Q9VXT0	0.448305	1.06116
5618	Q9VXU2;Q9VXU1	Q9VXU2;Q9VXU1	0.247843	0.373859
5620	Q9VXU6	Q9VXU6	0.434862	0.782899
5623	Q9VXV3	Q9VXV3	0.250638	0.160681
5626	Q9VXW2	Q9VXW2	0.458433	0.430241
5630	Q9VXW9;Q8IR40	Q9VXW9;Q8IR40	0.387523	0.162486
5632	Q9VXY5	Q9VXY5	-0.185263	-0.0540634
5633	Q9VXY7	Q9VXY7	0.0257416	0.0938917
5634	Q9VXY9	Q9VXY9	-0.147887	0.0273882
5637	Q9VXZ8	Q9VXZ8	-0.511683	-0.669798
5638	Q9VY02	Q9VY02	0.337992	0.377111
5647	Q9VY49	Q9VY49	-0.150559	-0.35811
5650	Q9VY76;Q76NR0;M9NDW2	Q9VY76;Q76NR0	0.39396	0.294838
5651	Q9VY78	Q9VY78	-0.287255	-0.386298
5653	Q9VY87	Q9VY87	-0.315225	-0.248682
5654	Q9VY91	Q9VY91	0.450204	0.446081
5665	Q9VYB2	Q9VYB2	0.84058	0.843652
5666	Q9VYD5	Q9VYD5	-0.418091	0.0160059
5669	Q9VYE9;M9PHQ4;X2JF51	Q9VYE9	-0.445113	-0.606492
5674	Q9VYG3	Q9VYG3	-0.0530669	-0.154515
5678	Q9VYI1	Q9VYI1	0.899129	0.906998
5681	Q9VYJ1	Q9VYJ1	0.7942	0.69655
5685	Q9VYK0;M9PGZ8	Q9VYK0;M9PGZ8	0.631083	0.554024
5686	Q9VYK6;A4V4D2;Q9VYK5	Q9VYK6;A4V4D2;Q9VYK5	0.568325	0.529565
5688	Q9VYK8	Q9VYK8	0.241586	0.407264
5690	Q9VYL5	Q9VYL5	-0.528278	-0.717147
5695	Q9VYQ9	Q9VYQ9	0.449015	0.324901
5697	Q9VYR1;Q76NR6	Q9VYR1;Q76NR6	-0.460882	-0.46626
5700	X2JJK8;Q9VYS5	X2JJK8;Q9VYS5	0.174091	0.0496045
5705	Q9VYT5	Q9VYT5	-0.0879672	-0.181451
5708	Q9VYV3	Q9VYV3	0.107392	0.208043
5717	Q9VYX4	Q9VYX4	-0.654431	-0.533328
5721	Q9VYY7;Q960N6;M9PHL2	Q9VYY7;Q960N6;M9PHL2	0.930148	0.933819
5725	Q9VZ01	Q9VZ01	-0.622177	-0.483001
5727	Q9VZ04	Q9VZ04	-0.0740239	-0.0626516
5734	Q9VZ34	Q9VZ34	0.168537	0.264056
5735	Q9VZ35	Q9VZ35	1.11859	1.40375
5737	Q9VZ55	Q9VZ55	-0.189064	-0.135288
5738	Q9VZ56;X2JB52	Q9VZ56;X2JB52	0.170084	0.357401
5739	Q9VZ57	Q9VZ57	1.2575	1.50425
5741	Q9VZ60	Q9VZ60	0.057754	-0.0631442
5743	Q9VZ62	Q9VZ62	0.525681	0.413846
5749	Q9VZC8	Q9VZC8	-0.157479	-0.128903
5754	Q9VZE5	Q9VZE5	1.64367	1.26067
5756	Q9VZE7;M9PHD2	Q9VZE7;M9PHD2	-1.22263	-1.12433
5758	Q9VZF1	Q9VZF1	-0.350398	-0.16763
5762	Q9VZF5	Q9VZF5	0.238437	0.12814
5765	Q9VZI1;M9PE30	Q9VZI1;M9PE30	-0.704168	-0.650205
5770	Q9VZJ9	Q9VZJ9	-0.534863	-0.442249
5775	Q9VZL5	Q9VZL5	-0.32756	-0.330879
5785	Q9VZS6	Q9VZS6	-0.302931	-0.100907
5789	Q9VZU7	Q9VZU7	-0.117014	-0.102965
5791	Q9VZV5	Q9VZV5	0.0367048	0.00775301
5797	Q9VZX7	Q9VZX7	0.604408	0.696796
5799	Q9VZX9;Q7KSG0;P50245	Q9VZX9	-0.457372	-0.570198
5803	Q9VZZ6	Q9VZZ6	-0.121464	-0.337245
5804	Q9VZZ9	Q9VZZ9	1.56494	1.5448
5807	Q9W022	Q9W022	-0.357249	-0.325997
5809	Q9W028	Q9W028	-0.715329	-0.699943
5810	Q9W029	Q9W029	0.44509	0.363263
5817	Q9W060	Q9W060	0.424899	0.54222
5827	Q9W0B2;A0A0S0WGR0	Q9W0B2;A0A0S0WGR0	-0.378176	-0.615898
5844	Q9W0G7	Q9W0G7	0.434057	0.410268
5846	Q9W0H3	Q9W0H3	-0.112307	-0.184417
5848	Q9W0H8;Q8IRH7	Q9W0H8	-0.256593	-0.147985
5849	Q9W0H9	Q9W0H9	0.365651	0.493714
5851	Q9W0J9	Q9W0J9	0.429442	0.426063
5857	Q9W0M5	Q9W0M5	-0.136204	-0.286477
5859	Q9W0M7;M9PDJ8	Q9W0M7	-0.0912805	-0.0932767
5860	Q9W0N1;M9PBH2	Q9W0N1;M9PBH2	0.523351	0.204233
5866	Q9W0P8	Q9W0P8	-0.0416434	-0.0121761
5867	Q9W0Q2	Q9W0Q2	-0.293268	-0.507188
5869	Q9W0R0	Q9W0R0	0.142857	0.0256704
5877	Q9W0U6	Q9W0U6	-0.251006	-0.0360815
5884	Q9W102	Q9W102	-0.219903	-0.257428
5892	Q9W133	Q9W133	0.0494209	0.0119059
5900	Q9W148	Q9W148	0.396786	0.405221
5906	Q9W198	Q9W198	0.339918	0.398906
5911	Q9W1A9	Q9W1A9	-0.226031	-0.0920561
5912	Q9W1B0	Q9W1B0	0.29593	0.379694
5913	Q9W1B9	Q9W1B9	-1.01053	-1.01094
5935	Q9W1I9	Q9W1I9	-0.657087	-0.535689
5939	Q9W1M7	Q9W1M7	0.171269	0.114265
5941	Q9W1N3	Q9W1N3	-0.00912537	-0.136101
5944	Q9W1Q5	Q9W1Q5	0.454976	0.702817
5946	Q9W1R3	Q9W1R3	-0.0206777	-0.0734731
5955	Q9W1X4	Q9W1X4	0.378829	0.27979
5960	Q9W1Y8	Q9W1Y8	0.361147	0.349738
5967	Q9W236	Q9W236	1.12169	0.380546
5971	Q9W247;G5CKU5	Q9W247	0.159786	0.110059
5975	Q9W254	Q9W254	-0.0366314	-0.176759
5983	Q9W289	Q9W289	0.554629	0.533406
5992	Q9W2E7	Q9W2E7	-0.176394	-0.0570063
5993	Q9W2E8	Q9W2E8	-0.0678723	-0.0116715
5996	Q9W2F4	Q9W2F4	0.0968089	0.0942998
5999	Q9W2G8	Q9W2G8	0.149013	-0.093113
6000	Q9W2G9	Q9W2G9	0.873384	1.10678
6001	Q9W2H0	Q9W2H0	-0.114076	-0.0100843
6003	Q9W2H8;Q86BS7	Q9W2H8;Q86BS7	0.122543	0.0805839
6005	Q9W2I2	Q9W2I2	0.549508	0.627639
6006	Q9W2I4	Q9W2I4	0.404044	0.349054
6018	Q9W2N6	Q9W2N6	0.789284	0.768211
6020	Q9W2P5	Q9W2P5	0.437753	0.581086
6023	Q9W2S2;X2JJA8;X2JEE0	Q9W2S2	0.33172	0.428501
6027	Q9W2U7;M9PE74	Q9W2U7;M9PE74	0.540867	0.406815
6034	X2JEB6;Q9W303	X2JEB6;Q9W303	2.41509	2.46587
6037	Q9W328	Q9W328	-0.216701	-0.209748
6038	Q9W329	Q9W329	0.174324	0.0942673
6043	Q9W347;M9PHH0	Q9W347;M9PHH0	0.396759	0.351968
6044	Q9W350	Q9W350	0.172453	0.221455
6045	Q9W351	Q9W351	0.20297	0.045381
6051	Q9W370	Q9W370	-2.3716	-2.59717
6056	Q9W384	Q9W384	0.259688	0.144842
6060	Q9W392	Q9W392	-0.259437	-0.305378
6062	Q9W396	Q9W396	0.930513	0.623911
6064	Q9W3B2	Q9W3B2	0.282905	0.137739
6065	Q9W3B3	Q9W3B3	0.262607	0.131839
6067	Q9W3C1;X2JD07	Q9W3C1;X2JD07	-0.135516	-0.0916772
6069	Q9W3C3	Q9W3C3	-0.50107	-0.446159
6070	Q9W3C4	Q9W3C4	-0.911648	-0.908827
6071	S5WMX5;Q9W3C7	S5WMX5;Q9W3C7	-0.088814	0.041575
6072	Q9W3C8	Q9W3C8	0.430519	0.336095
6075	Q9W3D2;Q9W3D3	Q9W3D2;Q9W3D3	-0.195808	-0.224697
6098	Q9W3M4	Q9W3M4	-0.323789	-0.602339
6102	Q9W3N1	Q9W3N1	1.12891	1.30053
6106	Q9W3N9	Q9W3N9	-0.6986	-0.753613
6110	Q9W3R6	Q9W3R6	0.752928	0.579265
6117	Q9W3T2	Q9W3T2	-0.447664	-0.373811
6121	Q9W3U0	Q9W3U0	-0.0418823	-0.36797
6123	Q9W3U9;X2JAQ5	Q9W3U9;X2JAQ5	0.212599	0.10857
6130	Q9W3W4	Q9W3W4	0.0503263	0.236093
6136	Q9W3X8	Q9W3X8	1.00851	0.900309
6142	Q9W3Z4	Q9W3Z4	1.39535	1.72654
6144	Q9W401	Q9W401	-0.271944	-0.355987
6147	Q9W404	Q9W404	1.45753	1.5119
6150	Q9W413	Q9W413	0.636091	0.47565
6151	Q9W414	Q9W414	0.075573	0.115501
6152	Q9W415	Q9W415	-0.0178951	-0.042848
6153	Q9W422	Q9W422	-0.651301	-0.720026
6155	Q9W424	Q9W424	0.515896	0.667502
6156	Q9W425	Q9W425	-0.0854166	-0.102328
6161	Q9W448;X2JDV7	Q9W448;X2JDV7	-0.238329	-0.174972
6162	Q9W451	Q9W451	-0.145267	-0.253814
6164	Q9W461	Q9W461	0.772327	1.11855
6166	Q9W464	Q9W464	-0.231034	-0.202834
6167	Q9W469	Q9W469	-1.71465	0.484942
6168	Q9W482	Q9W482	0.60395	0.57672
6170	Q9W486;X2JIH1;F3YD98	Q9W486;X2JIH1;F3YD98	0.292846	0.163442
6177	Q9W4C3	Q9W4C3	-0.0354774	-0.0893898
6179	X2JE64;Q9W4D4	X2JE64;Q9W4D4	0.509388	0.217817
6192	Q9W4K0	Q9W4K0	0.105334	-0.108225
6193	Q9W4K1	Q9W4K1	-0.132421	-0.0700763
6194	Q9W4K8	Q9W4K8	-0.916287	-1.19326
6203	Q9W4N8;Q7KVX5	Q9W4N8;Q7KVX5	0.415538	0.321235
6206	Q9W4P5	Q9W4P5	0.904866	0.716095
6212	Q9W4U2	Q9W4U2	-0.117273	0.00385571
6215	Q9W4W8	Q9W4W8	0.285593	0.185818
6217	Q9W4X7	Q9W4X7	-0.0365351	0.00787986
6220	Q9W4Z1;X2JI50	Q9W4Z1;X2JI50	0.0478738	0.0973523
6224	Q9W509	Q9W509	0.898474	1.00896
6229	Q9W526	Q9W526	-0.506234	-0.442538
6230	Q9W531	Q9W531	0.268407	-0.0378283
6233	Q9W543	Q9W543	0.122716	0.0679292
6234	Q9W547	Q9W547	-0.0266222	-0.150159
6243	X2JA43;Q9W590	X2JA43;Q9W590	0.0990173	-0.00259191
6249	Q9W5D3	Q9W5D3	0.0265715	0.0848852
6259	Q9W5T4;A0A0B4LFP2	Q9W5T4;A0A0B4LFP2	0.243973	0.253065
6267	Q9XTM1	Q9XTM1	-0.222383	-0.0494054
6269	Q9XY35	Q9XY35	-0.66148	-0.384976
6270	Q9XYA7;Q8INR0;Q8INQ9	Q9XYA7;Q8INR0;Q8INQ9	0.347792	0.087571
6275	Q9XYU0	Q9XYU0	-0.0307404	-0.110628
6276	Q9XYU1;X2JAI4	Q9XYU1;X2JAI4	-0.301963	-0.395703
6278	Q9XYZ4	Q9XYZ4	0.365564	0.409126
6279	Q9XYZ5	Q9XYZ5	0.049275	-0.00268404
6282	Q9XZ03;M9PFR6	Q9XZ03;M9PFR6	0.56888	0.572166
6285	Q9XZ10;Q8IML5	Q9XZ10;Q8IML5	-0.202786	-0.474882
6290	Q9XZ16	Q9XZ16	0.0604475	0.119339
6292	Q9XZ21;D5SHU1	Q9XZ21	0.527222	0.451044
6293	Q9XZ22	Q9XZ22	0.21146	0.231708
6294	Q9XZ29	Q9XZ29	0.126785	0.0863413
6297	Q9XZ53	Q9XZ53	-0.413515	-0.262821
6299	Q9XZ58	Q9XZ58	-0.40509	-0.284936
6312	Q9Y0Y2	Q9Y0Y2	0.135635	0.0526484
6314	Q9Y0Z0;Q8IPJ6	Q9Y0Z0;Q8IPJ6	-0.13893	0.111883
6317	Q9Y105	Q9Y105	0.290735	0.378119
6319	Q9Y112;Q9VZK8	Q9Y112	-0.668536	-0.775809
6329	Q9Y140	Q9Y140	0.223268	0.130444
6335	Q9Y165	Q9Y165	-0.556422	-0.181723
6336	Q9Y166	Q9Y166	-0.364556	-0.130495
6338	Q9Y171	Q9Y171	-0.0352553	-0.343607
6341	Q9Y1B2	Q9Y1B2	0.453349	0.449882
6342	Q9Y1T2	Q9Y1T2	0.660452	0.515206
6534	X2JC02;X2J8M7;X2JCG0;E1JIB9;Q7KV98;Q9W016;E1JIC0;X2JAL9;M9PDU5;M9MRU6;Q9W013;Q8IRF0	X2JC02;X2J8M7;X2JCG0;E1JIB9;Q7KV98;Q9W016;E1JIC0;X2JAL9;M9PDU5	0.0756219	-0.00852779
6536	X2JAM4;X2JG79;Q7KV92;M9PEC5;Q0E8J1;M9MRP8;M9NFH6;M9MRN5;M9MRZ4;M9NEY0;M9MRQ1	X2JAM4;X2JG79;Q7KV92;M9PEC5;Q0E8J1	-0.204841	-0.143753
6537	X2JB48;Q26365	X2JB48;Q26365	-0.623932	-0.659058
6548	X2JEY9;M9PHF1;X2JJP5;A8JUU1	X2JEY9;M9PHF1;X2JJP5;A8JUU1	0.651391	0.551982

## Sheet: Phospho_Deviation_Anova+&-
Phospho_ID	Uniprot ID	Majority protein IDs	Log2 Deviation DLVtl	Log2 Deviation DLVsp
4	A0A023GPN3	A0A023GPN3	0.00638486	0.04407
5	A0A023GPN3	A0A023GPN3	0.474111	0.468394
9	A0A023GPV6	A0A023GPV6	-0.1718	-0.186032
13	A0A023GPV6	A0A023GPV6	0.692851	0.509034
14	A0A023GPV6	A0A023GPV6	0.169389	0.157105
17	A0A023GQ99	A0A023GQ99	-0.0224113	0.0140298
18	A0A023GQ99	A0A023GQ99	-0.0901516	-0.0650155
19	A0A023GQ99	A0A023GQ99	0.487381	0.515713
34	E5DK16	E5DK16	-0.271382	-0.283468
38	E5DK16	E5DK16	0.25088	0.237475
41	A0A0B4JD24	A0A0B4JD24	-0.347501	-0.327199
42	A0A0B4JD24	A0A0B4JD24	-0.313034	-0.293786
50	A0A0B4KG78	A0A0B4KG78	-0.116555	-0.107118
53	A0A0B4KG78;Q7K1Q6	Q7K1Q6	-0.10224	-0.244791
54	A0A0B4KG78;Q7K1Q6	Q7K1Q6	-0.172319	-0.14382
55	A0A0B4JCV4	A0A0B4JCV4	0.441118	0.36384
56	A0A0B4JCV4	A0A0B4JCV4	-0.353328	-0.400345
57	A0A0B4JCV4	A0A0B4JCV4	1.03366	1.15127
58	A0A0B4JCV4	A0A0B4JCV4	0.141029	0.117938
63	A0A0B4JCV4	A0A0B4JCV4	-0.173635	-0.153374
64	A0A0B4JCV4	A0A0B4JCV4	-0.488243	-0.415763
65	A0A0B4JCV4	A0A0B4JCV4	-0.0447812	-0.172372
67	A0A0B4JCV4	A0A0B4JCV4	0.597116	0.582342
68	A0A0B4JCV4	A0A0B4JCV4	0.674002	0.662155
69	A0A0B4JCV4	A0A0B4JCV4	0.536891	0.59636
70	A0A0B4JCV4	A0A0B4JCV4	0.536891	0.59636
72	A0A0B4JCV4	A0A0B4JCV4	-0.215334	-0.132593
73	A0A0B4JCV4	A0A0B4JCV4	-0.0912056	-0.0663863
74	A0A0B4JCV4	A0A0B4JCV4	-0.179232	0.0439596
76	A0A0B4JCV4	A0A0B4JCV4	-0.167916	-0.153777
77	A0A0B4JCV4	A0A0B4JCV4	-0.236759	-0.207644
81	A0A0B4LHQ4	A0A0B4LHQ4	-0.425614	-0.386812
82	A0A0B4LHQ4	A0A0B4LHQ4	-0.190957	-0.129094
90	A0A0B4LHP1	A0A0B4LHP1	-0.107653	-0.0728542
92	A0A0B4LHP1	A0A0B4LHP1	-0.440777	-0.463252
93	A0A0B4LHP1	A0A0B4LHP1	-0.0626698	-0.0554569
94	A0A0B4LHP1	A0A0B4LHP1	-0.0528337	-0.0649126
95	A0A0B4LHP1	A0A0B4LHP1	-0.824721	-0.69867
96	A0A0B4LHP1	A0A0B4LHP1	-0.163033	-0.0316146
97	A0A0B4LHP1	A0A0B4LHP1	-0.250765	-0.138848
99	A0A0B4LHP1	A0A0B4LHP1	1.05688	1.15129
102	A0A0B4LHP1	A0A0B4LHP1	-0.2126	-0.191443
103	C8VV76	C8VV76	-0.647257	-0.564684
105	C8VV76	C8VV76	-0.655427	-0.585624
107	Q961V3	Q961V3	0.0436061	0.0203326
109	Q961V3	Q961V3	0.0393773	-0.0622896
110	A0A0B4JD33	A0A0B4JD33	0.595471	0.416508
111	A0A0B4JD33	A0A0B4JD33	-0.435878	-0.40452
115	A0A0B4JD46	A0A0B4JD46	-0.166823	-0.149704
116	A0A0B4JD48	A0A0B4JD48	-0.867714	-0.861955
117	A0A0B4JD48	A0A0B4JD48	-0.755921	-0.776642
124	Q59E58	Q59E58	0.00466211	-0.0126153
125	A0A0B4JDC3	A0A0B4JDC3	-0.383364	-0.330288
128	A0A0B4JDC3	A0A0B4JDC3	-0.0086928	-0.0357356
129	A0A0B4JDC3	A0A0B4JDC3	-0.0086928	-0.0357356
130	A0A0B4JDC3	A0A0B4JDC3	-0.0593499	-0.29538
139	E1JJ72	E1JJ72	-0.378241	-0.388182
140	E1JJ72	E1JJ72	-0.034436	0.10953
160	Q9VNA1;Q8MSQ5	Q9VNA1	-1.11299	-1.05852
164	Q9VNA1;Q8MSQ5	Q9VNA1	-0.248388	-0.135989
166	Q9VNA1;Q8MSQ5	Q9VNA1	-0.138769	-0.0474338
169	Q9VNA1;Q8MSQ5	Q9VNA1	-1.01422	-0.997169
177	A0A0B4K623	A0A0B4K623	0.570678	0.542887
179	Q59DW9	Q59DW9	-0.1909	-0.113779
183	Q59DW9	Q59DW9	0.250617	0.177826
190	Q0KI68	Q0KI68	-0.336476	-0.302823
195	Q0KI68	Q0KI68	0.0811862	0.0671135
198	A0A0B4K664	A0A0B4K664	-0.0171412	-0.0480012
199	A0A0B4K664	A0A0B4K664	-0.790754	-0.756024
200	A0A0B4K664	A0A0B4K664	-0.389632	-0.352152
206	A0A0B4K680	A0A0B4K680	-0.373914	-0.411039
207	A0A0B4K680	A0A0B4K680	-0.599608	-0.580474
208	A0A0B4K680	A0A0B4K680	-0.72687	-0.796883
210	Q6NNB4	Q6NNB4	-0.975658	-0.966056
213	O46342	O46342	0.0343843	0.0413185
214	O46342	O46342	2.61977	2.62194
215	O46342	O46342	1.40058	1.39919
219	A0A0B4K6B8	A0A0B4K6B8	-0.161184	-0.167813
221	A0A0B4K6B8	A0A0B4K6B8	-0.337888	-0.386979
222	A0A0B4K6B8	A0A0B4K6B8	-0.145364	-0.149681
225	A0A0B4K6D2	A0A0B4K6D2	0.214196	0.201348
235	A0A0B4K6D6	A0A0B4K6D6	-0.109965	-0.179974
236	Q9VG78	Q9VG78	0.228429	0.279813
239	Q9VG78	Q9VG78	0.25506	0.191939
243	Q9VG78	Q9VG78	0.085865	0.018233
244	Q9VG78	Q9VG78	-0.0927955	0.0448389
256	A0A0B4K6I2	A0A0B4K6I2	1.3669	1.24745
257	A0A0B4K6I2	A0A0B4K6I2	1.3669	1.24745
277	A0A0B4KHY2	A0A0B4KHY2	-0.35285	-0.357161
278	A0A0B4KHY2	A0A0B4KHY2	-0.198628	-0.185103
280	A0A0B4K6M7	A0A0B4K6M7	0.178294	0.124878
281	A0A0B4LHZ6	A0A0B4LHZ6	-0.109322	-0.0722847
282	A0A0B4LHZ6	A0A0B4LHZ6	-0.166252	-0.0434593
287	A0A0B4K6N7	A0A0B4K6N7	-0.188396	-0.179241
291	A0A126GUM8	A0A126GUM8	-0.183815	-0.125107
293	A0A126GUM8	A0A126GUM8	0.0615122	0.0981479
295	A0A126GUM8	A0A126GUM8	-0.689752	-0.616657
296	A0A126GUM8	A0A126GUM8	-0.439619	-0.439776
297	A0A126GUM8	A0A126GUM8	-0.324463	-0.392466
298	A0A126GUM8	A0A126GUM8	-0.550679	-0.488468
308	A0A0B4K6W1	A0A0B4K6W1	0.338045	0.310834
309	A0A0B4K6W1	A0A0B4K6W1	-0.331438	-0.262471
310	A0A0B4K6W1	A0A0B4K6W1	0.203766	0.147993
311	A0A0B4K6X3	A0A0B4K6X3	0.163779	0.174632
315	A0A0B4K6Y7;Q9VHK1	Q9VHK1	-0.173848	-0.0940045
320	A0A0B4K6Y7;Q9VHK1	Q9VHK1	-0.0870374	-0.101027
321	A0A0B4K6Y7;Q9VHK1	Q9VHK1	-0.274331	-0.270619
328	A0A0B4KHR8	A0A0B4KHR8	-0.400984	-0.451174
329	A0A0B4KHR8	A0A0B4KHR8	-0.178106	-0.201424
330	A0A0B4KHR8	A0A0B4KHR8	0.594044	0.434331
333	A0A0B4KHR8	A0A0B4KHR8	-0.416769	-0.400829
336	A0A0B4KHR8	A0A0B4KHR8	0.306797	0.258256
340	A0A0B4KHR8	A0A0B4KHR8	-0.125612	-0.0899809
346	Q5U0Y0;A0A0B4LF82;A1Z928	Q5U0Y0	0.310925	0.290271
347	Q5U0Y0;A1Z928	Q5U0Y0	-0.0351541	-0.0802375
355	A1ZB80	A1ZB80	-0.104232	-0.0625814
356	A1ZB80	A1ZB80	0.0900511	0.0840709
359	A1ZB80;A1ZB83;A1ZB79	A1ZB80	-0.206813	-0.127762
360	A1ZB80;A1ZB83;A1ZB79	A1ZB80	-0.650716	-0.569883
363	A1ZB80;A1ZB83;A1ZB79	A1ZB80	-0.637892	-0.583997
364	A1ZB80;A1ZB83;A1ZB79	A1ZB80	-0.875185	-0.868377
366	A1ZB80;A1ZB83;A1ZB79	A1ZB80	-0.740653	-0.624012
367	A1ZB80;A1ZB83;A1ZB79	A1ZB80	-0.312661	-0.281081
369	A0A0B4K7G4	A0A0B4K7G4	0.17383	0.16044
370	A0A0B4K7G4	A0A0B4K7G4	0.693363	0.663122
371	A0A0B4K7G4	A0A0B4K7G4	0.306221	0.24706
372	A0A0B4K7G4	A0A0B4K7G4	0.29686	0.296365
374	D3DN23	D3DN23	0.0956616	0.0422337
377	A1Z8W9	A1Z8W9	0.161966	0.139979
378	A1Z8W9	A1Z8W9	0.123908	0.108816
384	A0A0B4K7S0	A0A0B4K7S0	0.0526479	-0.0295536
393	A0A0B4K7S0	A0A0B4K7S0	-0.0110105	0.0702332
395	A0A0B4K7S0	A0A0B4K7S0	0.086055	0.0789025
402	A0A0B4LFF8	A0A0B4LFF8	1.4792	1.47883
407	A0A0B4LFF8	A0A0B4LFF8	-0.166845	-0.168106
411	A0A0B4K7U3	A0A0B4K7U3	-0.0591786	-0.0447862
412	A0A0B4K7U3	A0A0B4K7U3	0.242842	0.268545
417	A0A0B4K7Y7	A0A0B4K7Y7	0.116745	0.127059
418	A0A0B4K7Y7	A0A0B4K7Y7	0.0649345	0.0220928
419	A0A0B4K7Y7	A0A0B4K7Y7	-0.00538447	-0.00941201
421	A0A0B4K7Y7	A0A0B4K7Y7	0.378874	0.396909
422	A0A0B4K7Y7	A0A0B4K7Y7	0.314869	0.254763
423	A0A0B4K7Y7	A0A0B4K7Y7	0.0414671	0.0101177
425	A0A0B4K7Y7	A0A0B4K7Y7	-0.502598	-0.485607
426	A0A0B4K7Y7	A0A0B4K7Y7	-0.312133	-0.39176
427	A0A0B4K7Y7	A0A0B4K7Y7	0.0188185	-0.021926
432	A0A0B4K7Y7	A0A0B4K7Y7	-0.0203872	0.0327529
438	A0A0B4K7Y7	A0A0B4K7Y7	-0.157751	-0.18552
440	A0A0B4K7Y7	A0A0B4K7Y7	-0.146526	-0.138585
445	A0A0B4LF25	A0A0B4LF25	0.195059	0.190087
447	A0A0B4K7Z5	A0A0B4K7Z5	-0.288406	-0.287317
449	A0A0B4K833	A0A0B4K833	-0.63503	-0.526116
459	A1Z945	A1Z945	0.333307	0.321007
461	A0A0B4K862	A0A0B4K862	-0.0986836	-0.0943685
462	A0A0B4K863	A0A0B4K863	-0.675269	-0.577615
463	A0A0B4K863	A0A0B4K863	-0.0992583	-0.059048
464	A0A0B4K863	A0A0B4K863	0.0566173	-0.145391
466	A0A0B4K863	A0A0B4K863	-0.130273	-0.121763
467	A0A0B4K863	A0A0B4K863	-0.677457	-0.663447
468	A0A0B4K863	A0A0B4K863	-0.79626	-0.821175
479	A0A0B4K863	A0A0B4K863	-0.0879033	-0.012804
484	A0A0B4K863	A0A0B4K863	0.40103	0.445336
498	A0A0B4K8A7	A0A0B4K8A7	-0.380927	-0.549128
499	A0A0B4K8A7	A0A0B4K8A7	-0.380927	-0.549128
501	A1Z6Z3	A1Z6Z3	0.0716108	0.0782793
507	A0A0B4KEE7	A0A0B4KEE7	-0.363147	-0.354898
509	A0A0B4KEE7	A0A0B4KEE7	-0.198578	-0.281592
513	A0A0B4KEH0	A0A0B4KEH0	-0.349275	-0.27879
515	E1JH23	E1JH23	-0.19736	-0.189358
516	A0A0B4KEI5	A0A0B4KEI5	-0.0245566	-0.0333587
517	A0A0B4KEI5	A0A0B4KEI5	0.596446	0.614249
518	A0A0B4KEI5	A0A0B4KEI5	0.508979	0.552938
519	A0A0B4KEI5	A0A0B4KEI5	0.0294279	0.0169605
521	A0A0B4KEI5	A0A0B4KEI5	-0.0194133	-0.0374909
522	A0A0B4KEI5	A0A0B4KEI5	-0.234025	-0.20189
523	A0A0B4KEI5	A0A0B4KEI5	0.0656893	0.0686556
524	A0A0B4KEI5	A0A0B4KEI5	-0.139917	-0.11047
525	A0A0B4KEI5	A0A0B4KEI5	-0.00883507	-0.000590372
527	A0A0B4KEI8	A0A0B4KEI8	-0.616248	-0.564623
528	A0A0B4KEJ0	A0A0B4KEJ0	0.80707	1.00777
530	Q7JVY0	Q7JVY0	0.142006	0.163714
533	A0A0B4KEK1	A0A0B4KEK1	-0.143775	-0.113446
550	A0A0B4KEM3	A0A0B4KEM3	-0.197057	-0.197986
558	Q95RL2	Q95RL2	-0.785619	-0.91709
559	Q95RL2	Q95RL2	-0.0105644	0.00514911
560	Q95RL2	Q95RL2	0.0178989	0.070656
561	Q95RL2	Q95RL2	-0.0693645	-0.139745
562	Q95RL2	Q95RL2	0.169238	0.18175
572	Q9N693	Q9N693	0.299233	0.223164
573	Q9N693	Q9N693	0.330278	0.322105
575	Q9N693	Q9N693	-0.25483	-0.225053
576	Q9N693	Q9N693	-0.183291	-0.121826
582	Q9N693	Q9N693	-0.0739109	-0.0642495
584	Q9N693	Q9N693	-0.0675093	-0.0490089
585	Q9N693	Q9N693	-0.620404	-0.519041
586	Q9N693	Q9N693	-0.947373	-0.891817
587	A0A0B4KEV9	A0A0B4KEV9	0.511848	0.529982
590	A0A0B4KEY6;A0A0B4KFA4	A0A0B4KFA4	-0.669534	-0.640087
591	A0A0B4KEY6;A0A0B4KFA4	A0A0B4KFA4	-0.683573	-0.771263
596	A0A0B4KEY6;A0A0B4KFA4	A0A0B4KFA4	-0.389674	-0.305368
617	A0A0B4KF05	A0A0B4KF05	-0.440751	-0.423833
623	Q9VNC4	Q9VNC4	-0.374424	-0.272748
626	A0A0B4KF46;Q8T0L3	Q8T0L3	-0.372205	-0.3213
631	Q0E965	Q0E965	-0.0412985	-0.0576484
632	Q0E965	Q0E965	-0.021412	-0.0639257
633	Q0E965	Q0E965	0.359513	0.363325
634	Q0E965	Q0E965	0.254888	0.316654
635	Q0E965	Q0E965	-0.225815	-0.232122
636	Q0E965	Q0E965	-0.00206249	0.0385795
637	Q0E965	Q0E965	-0.00206249	0.00150262
641	A0A0B4KF90	A0A0B4KF90	1.87888	2.03794
642	A0A0B4KF92	A0A0B4KF92	-0.399523	-0.414759
643	A8DY98	A8DY98	-0.101588	0.12051
644	A8DY98	A8DY98	0.847392	0.862043
647	A0A0B4KFA4	A0A0B4KFA4	-0.903811	-0.906152
648	A0A0B4KFB8	A0A0B4KFB8	-0.156959	-0.148496
649	A0A0B4KFB8	A0A0B4KFB8	-0.156959	-0.148496
651	A0A0B4KFB8	A0A0B4KFB8	0.0116085	-0.0311334
652	A0A0B4KFB8	A0A0B4KFB8	0.268996	0.242289
653	A0A0B4KFB8	A0A0B4KFB8	0.131404	0.0810806
655	A0A0B4KFB8	A0A0B4KFB8	-0.0816664	0.109754
674	A0A0B4KFE9	A0A0B4KFE9	0.0219911	0.0949958
675	A0A0B4KFE9	A0A0B4KFE9	0.272289	0.272723
680	A0A0B4KFF0	A0A0B4KFF0	-0.113244	-0.158952
686	A0A0B4KFF0	A0A0B4KFF0	-0.149881	-0.128335
689	Q7K304	Q7K304	-1.08307	-1.0718
690	Q7K304	Q7K304	-1.01855	-0.995583
691	Q7K304	Q7K304	-1.19163	-1.16367
692	Q7K304	Q7K304	0.383282	0.45936
694	Q7K304	Q7K304	-0.748647	-0.694487
695	A0A0B4KGE6	A0A0B4KGE6	0.0642372	0.085053
697	A0A0B4KGE6	A0A0B4KGE6	0.47019	0.392787
698	A0A0B4KFJ0	A0A0B4KFJ0	-0.0703597	-0.0914437
699	A0A0B4KFJ0	A0A0B4KFJ0	0.212871	0.248595
702	A0A0B4KFJ7	A0A0B4KFJ7	0.729141	0.671583
703	A0A0B4KFJ7	A0A0B4KFJ7	-0.213104	-0.230126
709	A0A0B4KH36	A0A0B4KH36	-0.400224	-0.542169
713	A0A0B4KH36	A0A0B4KH36	0.412343	0.379793
721	A0A0B4KFR1	A0A0B4KFR1	0.10542	0.103119
729	A0A126GUN5	A0A126GUN5	-0.332307	-0.278546
737	A0A0B4KFW0	A0A0B4KFW0	0.0374675	-0.00769029
738	Q9W1Y0	Q9W1Y0	0.524227	0.601022
740	Q9W1Y0	Q9W1Y0	0.250145	0.280163
741	A0A0B4KFY9	A0A0B4KFY9	0.43638	0.616123
746	A0A0B4KGP0	A0A0B4KGP0	0.261082	0.3454
755	Q9VEH1	Q9VEH1	-0.329861	-0.270684
756	Q9VEH1	Q9VEH1	0.042572	0.0737128
759	Q9VF92	Q9VF92	0.48441	0.581055
764	Q9VF92	Q9VF92	-0.0783742	-0.119459
765	Q9VF92	Q9VF92	0.0664452	0.0913479
766	Q9VNF7	Q9VNF7	-0.442264	-0.604502
774	A0A0B4KG81	A0A0B4KG81	0.510382	0.497165
775	A0A0B4KG81	A0A0B4KG81	-0.464804	-0.436922
776	A0A0B4KG81	A0A0B4KG81	0.430226	0.430372
777	A0A0B4KG81	A0A0B4KG81	-0.0798464	-0.104634
782	A0A0B4KG81	A0A0B4KG81	-0.164578	0.245266
784	A0A0B4KG81	A0A0B4KG81	-0.0181922	-0.0116681
785	A0A0B4KG81	A0A0B4KG81	-0.488799	-0.52756
786	A0A0B4KG81	A0A0B4KG81	0.301099	0.36118
787	A0A0B4KG81	A0A0B4KG81	-0.0498481	-0.126878
789	A0A0B4KG83	A0A0B4KG83	-0.51384	-0.423555
790	A0A0B4KG83	A0A0B4KG83	-0.51384	-0.423555
792	A0A0B4KG87	A0A0B4KG87	-0.281756	-0.331127
793	Q9N6D7	Q9N6D7	-0.142653	-0.0124918
794	Q9N6D7	Q9N6D7	0.231911	0.245104
807	A0A0B4KHB1	A0A0B4KHB1	-0.0817496	-0.0552732
808	A0A0B4KHB1	A0A0B4KHB1	-0.0796973	-0.0532209
812	A0A0B4KHB1	A0A0B4KHB1	0.0279445	-0.00342485
817	A0A0B4KHS6;A0A0B4KGI7	A0A0B4KGI7	0.296515	0.223718
819	A8WHL4	A8WHL4	0.399343	0.309886
820	A8WHL4	A8WHL4	0.250111	0.284258
823	A0A0B4LIF3	A0A0B4LIF3	-2.39434	-2.22134
824	A0A0B4LIF3	A0A0B4LIF3	-0.294719	-0.231001
826	A0A0B4KGL6	A0A0B4KGL6	-0.527716	-0.463058
829	A0A0B4KH73	A0A0B4KH73	-0.367667	-0.313844
833	Q86BA6	Q86BA6	0.221781	1.18891
854	A0A0B4KH76	A0A0B4KH76	-0.068919	-0.089998
858	H1UUJ8	H1UUJ8	0.308093	0.347765
869	Q9VC89	Q9VC89	-0.310627	-0.285184
871	Q9VC89	Q9VC89	-0.1744	-0.130304
872	Q9VC89	Q9VC89	-0.149272	-0.156908
873	A0A0B4KGZ0	A0A0B4KGZ0	-0.873025	-0.887864
877	A0A0B4KH16	A0A0B4KH16	1.0995	0.928592
880	A0A0B4KH28	A0A0B4KH28	0.0614317	0.0785517
881	A0A0B4KH28	A0A0B4KH28	-0.0450181	-0.0157671
882	A0A0B4KH28	A0A0B4KH28	-0.0461131	-0.00694946
884	A0A0B4KH43	A0A0B4KH43	0.669724	0.563766
892	A0A0B4KHA1	A0A0B4KHA1	-0.424278	-0.596763
898	A0A0B4KHE9	A0A0B4KHE9	-0.0542655	-0.0797689
899	A0A0B4KHE9	A0A0B4KHE9	0.338487	0.223619
900	A0A0B4KHE9	A0A0B4KHE9	0.158531	0.171486
901	A0A0B4KHE9	A0A0B4KHE9	-0.0133103	-0.0411188
904	A0A0B4LIK5	A0A0B4LIK5	-0.368253	-0.518625
905	A0A0B4LIK5	A0A0B4LIK5	0.105138	-0.0390572
907	A0A0B4LIK5	A0A0B4LIK5	0.25926	0.22046
911	A0A0B4LIK5	A0A0B4LIK5	-0.803101	-0.874941
915	A0A0B4LIK5	A0A0B4LIK5	0.734169	0.58141
916	A0A0B4LIK5	A0A0B4LIK5	0.00619052	-0.104284
917	A0A0B4LIK5	A0A0B4LIK5	0.0524067	0.179997
920	A0A0B4LIK5	A0A0B4LIK5	0.751528	0.649653
923	A0A0B4LIK5	A0A0B4LIK5	-0.301976	-0.31265
926	A0A0B4LIK5	A0A0B4LIK5	-0.142142	-0.113144
927	A0A0B4LIK5	A0A0B4LIK5	0.9269	0.954158
928	A0A0B4LIK5	A0A0B4LIK5	-0.03434	-0.105577
931	A0A0B4LIK5	A0A0B4LIK5	0.164948	0.159314
932	A0A0B4LIK5	A0A0B4LIK5	0.266085	0.260833
938	A0A0B4KHJ5	A0A0B4KHJ5	0.589515	0.433808
939	A0A0B4KHJ5	A0A0B4KHJ5	0.275731	0.273007
940	A0A0B4KHJ5	A0A0B4KHJ5	-0.0541297	-0.0749017
941	A0A0B4KHJ5	A0A0B4KHJ5	-0.0865332	-0.0777584
942	A0A0B4KHJ5	A0A0B4KHJ5	0.125012	0.0912416
943	A0A0B4KHJ5	A0A0B4KHJ5	0.461201	0.374609
944	A0A0B4KHJ5	A0A0B4KHJ5	0.368497	0.272941
953	A0A0B4KHM2	A0A0B4KHM2	0.413537	0.306045
954	A0A0B4KHP8	A0A0B4KHP8	0.606503	0.459198
955	A0A0B4KHP8	A0A0B4KHP8	-0.120992	-0.120619
956	A0A0B4KHP8	A0A0B4KHP8	-0.180988	-0.188822
957	A0A0B4KHP8	A0A0B4KHP8	-1.23896	-1.21205
958	A0A0B4KHP8	A0A0B4KHP8	0.608321	0.548254
959	A0A0B4KHP8	A0A0B4KHP8	0.187323	0.192947
960	A0A0B4KHP8	A0A0B4KHP8	0.255436	0.299554
961	A0A0B4KHQ5	A0A0B4KHQ5	-0.265508	-0.295899
963	A0A0B4KHR6	A0A0B4KHR6	0.10494	0.149403
964	A0A0B4KHR6	A0A0B4KHR6	0.10494	0.149403
966	A0A0B4KHR6	A0A0B4KHR6	0.0312554	0.0864064
967	A0A0B4KHR6	A0A0B4KHR6	-0.663478	-0.451416
969	Q8IN63	Q8IN63	0.141518	0.218467
972	A0A0B4KHT9	A0A0B4KHT9	0.434793	0.430454
973	A0A0B4KHT9	A0A0B4KHT9	-0.116393	-0.0609773
975	A0A0B4KHU6	A0A0B4KHU6	0.292311	0.246184
976	A0A0B4KHU6	A0A0B4KHU6	-0.026559	0.112466
979	A0A0B4KHU6	A0A0B4KHU6	-0.40627	0.0889919
981	A0A0B4KHW1	A0A0B4KHW1	0.587358	0.292884
982	A0A0B4KHW3	A0A0B4KHW3	0.690753	0.656006
984	Q9V9X8	Q9V9X8	-0.575225	-0.593683
985	A0A0B4KHY4	A0A0B4KHY4	0.59854	0.573184
987	A0A0B4KHY6	A0A0B4KHY6	0.165864	-0.0322891
989	A0A0B4KHY6	A0A0B4KHY6	0.0459083	-0.061017
994	A0A0B4KHY8	A0A0B4KHY8	-0.522834	-0.548175
997	A0A0B4KHY8	A0A0B4KHY8	0.387579	0.387532
998	A0A0B4KHY8	A0A0B4KHY8	0.243304	0.0938121
999	A0A0B4KHZ0	A0A0B4KHZ0	0.959855	0.991969
1000	A0A0B4KHZ0	A0A0B4KHZ0	-0.0859745	-0.00829634
1001	A0A0B4KHZ0	A0A0B4KHZ0	0.00870025	0.0251013
1002	A0A0B4KHZ0	A0A0B4KHZ0	-0.0553251	-0.012271
1007	A0A0B4KHZ0	A0A0B4KHZ0	-0.173541	-0.167053
1009	A0A0B4KHZ0	A0A0B4KHZ0	0.117318	0.0845176
1010	A0A0B4KHZ0	A0A0B4KHZ0	0.139367	0.180121
1015	A0A0B4KHZ0	A0A0B4KHZ0	-0.603673	-0.581059
1016	A0A0B4KHZ0	A0A0B4KHZ0	-0.0277761	-0.130491
1017	A0A0B4KHZ0	A0A0B4KHZ0	0.0827459	0.0870126
1018	Q9VAY4	Q9VAY4	-0.30757	-0.16963
1019	Q9VAY4	Q9VAY4	0.122987	0.0331134
1020	Q9VAY4	Q9VAY4	0.312171	0.142904
1022	Q9VAY4	Q9VAY4	0.64261	0.697451
1023	Q9VAY4	Q9VAY4	0.377384	0.431352
1028	Q9VAY4	Q9VAY4	0.217298	0.119774
1029	A0A0B4KI07	A0A0B4KI07	-0.267202	-0.252774
1030	A0A0B4KI07	A0A0B4KI07	-0.267202	-0.252774
1037	Q9V9Y9	Q9V9Y9	0.116349	0.271654
1038	Q9V9Y9	Q9V9Y9	0.388287	0.344873
1040	A0A0B4KI69	A0A0B4KI69	0.230568	0.0548351
1042	A0A0B4KI71;Q8IMF5	Q8IMF5	0.121402	0.132452
1056	A0A0B4KI71;Q8IMF5	Q8IMF5	-0.997696	-0.894618
1057	A0A0B4KI71;Q8IMF5	Q8IMF5	-0.833349	-0.745155
1061	A0A0B4KI71	A0A0B4KI71	0.239735	0.269688
1067	Q7K4C2	Q7K4C2	0.446786	0.500465
1071	A0A0B4LEV2	A0A0B4LEV2	-0.105349	-0.0490551
1072	A0A0B4LEV2	A0A0B4LEV2	0.280778	0.333556
1073	A0A0B4LEV2	A0A0B4LEV2	-0.176616	-0.167338
1074	A0A0B4LEV2	A0A0B4LEV2	-0.146934	-0.11014
1079	A0A0B4LEV8	A0A0B4LEV8	0.246893	0.282923
1081	A0A0B4LEV8	A0A0B4LEV8	0.43898	0.39412
1082	A0A0B4LEV8	A0A0B4LEV8	0.01318	-0.0129477
1083	A0A0B4LEV8	A0A0B4LEV8	0.194252	0.108322
1084	A0A0B4LEV8	A0A0B4LEV8	0.355993	0.375452
1085	A0A0B4LEV8	A0A0B4LEV8	-0.0460081	-0.0704027
1097	A0A0B4LF14	A0A0B4LF14	-0.420164	-0.438771
1098	A0A0B4LF14	A0A0B4LF14	0.188072	0.198978
1099	A0A0B4LF26	A0A0B4LF26	-0.100853	-0.0902437
1100	A1Z9M4	A1Z9M4	0.0487753	0.0530684
1101	A1Z9M4	A1Z9M4	0.177759	0.21944
1102	A0A0B4LFF9	A0A0B4LFF9	0.527366	0.391289
1105	A0A0B4LFF9	A0A0B4LFF9	-0.309252	-0.242
1109	A0A0B4LFF9	A0A0B4LFF9	-0.101955	-0.0892885
1115	A0A0B4LFF9	A0A0B4LFF9	-0.452444	-0.403428
1116	A0A0B4LFF9	A0A0B4LFF9	-0.579686	-0.531899
1117	A0A0B4LFF9	A0A0B4LFF9	0.552428	0.554386
1119	A0A0B4LF57	A0A0B4LF57	-0.161681	-0.135264
1126	A0A0B4LFA6;Q7K2G1	Q7K2G1	0.0717085	0.0893724
1140	A0A0B4LFE1	A0A0B4LFE1	-1.50902	-1.27838
1142	A0A0B4LFE1	A0A0B4LFE1	0.826131	0.935617
1149	A0A0B4LFJ4	A0A0B4LFJ4	0.751646	0.808206
1150	A0A0B4LFJ4	A0A0B4LFJ4	0.415004	0.411772
1151	A0A0B4LFJ4	A0A0B4LFJ4	-0.229014	-0.23756
1152	A0A0B4LFJ4	A0A0B4LFJ4	-0.136322	-0.163492
1153	A0A0B4LFJ4	A0A0B4LFJ4	-0.214794	-0.239846
1154	A0A0B4LFJ4	A0A0B4LFJ4	0.236009	0.221713
1156	A0A0B4LFL2	A0A0B4LFL2	-0.0217635	-0.0216064
1158	A0A0B4LFL2	A0A0B4LFL2	0.16825	-0.0896037
1159	A0A0B4LFL2	A0A0B4LFL2	-0.0322363	-0.18748
1160	A0A0B4LFL2	A0A0B4LFL2	-0.0190933	-0.18252
1165	A0A0B4LFL2	A0A0B4LFL2	-0.150276	-0.231078
1168	A0A0B4LFL3	A0A0B4LFL3	-0.201319	-0.172159
1169	A0A0B4LFQ2	A0A0B4LFQ2	-0.300377	-0.251076
1170	A0A0B4LFQ2	A0A0B4LFQ2	-0.0380194	-0.0304134
1171	A0A0B4LFQ2	A0A0B4LFQ2	0.147632	0.257694
1172	A0A0B4LFQ2	A0A0B4LFQ2	-0.11658	0.0345317
1173	A0A0B4LFQ2	A0A0B4LFQ2	-0.153868	-0.123721
1176	A0A0B4LFQ2	A0A0B4LFQ2	-0.362529	-0.319165
1177	A0A0B4LFQ2	A0A0B4LFQ2	0.0696551	0.0382347
1178	A0A0B4LFQ2	A0A0B4LFQ2	-0.173092	-0.128686
1180	A0A0B4LGV3	A0A0B4LGV3	0.328416	0.303315
1182	A0A0B4LGV3	A0A0B4LGV3	0.104937	0.103842
1186	A0A0B4LGV3	A0A0B4LGV3	0.290798	0.417431
1189	A0A0B4LFX0	A0A0B4LFX0	-0.209098	-0.159182
1193	Q8MLW2	Q8MLW2	-0.292876	-0.348498
1194	Q8MLW2	Q8MLW2	0.199872	0.566695
1201	Q8MLW2	Q8MLW2	0.106805	0.103236
1204	Q8MLW2	Q8MLW2	0.163344	0.0656468
1205	A0A0B4LFY0	A0A0B4LFY0	0.0752115	0.182627
1206	A0A0B4LFZ4	A0A0B4LFZ4	0.093611	0.0778746
1220	A0A0B4LGB0	A0A0B4LGB0	-0.0399157	0.00854742
1222	A0A0B4LGB7	A0A0B4LGB7	0.241753	0.196522
1223	A0A0B4LGB7	A0A0B4LGB7	0.529326	0.557655
1227	A0A0B4LGF9	A0A0B4LGF9	0.0622614	0.0249908
1228	A0A0B4LGF9	A0A0B4LGF9	-1.14236e-05	0.0272381
1230	A0A0B4LGF9	A0A0B4LGF9	-0.483863	-0.338037
1231	A0A0B4LGF9	A0A0B4LGF9	-0.118667	-0.0756805
1232	A0A0B4LGF9	A0A0B4LGF9	-0.148125	-0.0767004
1240	A0A0B4LGF9	A0A0B4LGF9	-0.208751	-0.0956666
1244	A0A0B4LGG4	A0A0B4LGG4	0.0445446	0.0317053
1247	A0A0B4LGG6	A0A0B4LGG6	0.0926842	0.0340827
1249	A0A0B4LGH1;Q24560	Q24560	-0.350282	-0.572064
1254	A0A0B4LGI9	A0A0B4LGI9	0.00739459	0.0637822
1264	A0A0B4LGV6;Q9VHG5	A0A0B4LGV6	-0.111833	-0.0310581
1269	A0A0B4LGX0	A0A0B4LGX0	-0.553486	-0.568125
1270	A0A0B4LGX0	A0A0B4LGX0	0.00249103	0.0157473
1271	A0A0B4LGX0	A0A0B4LGX0	-0.340094	-0.302232
1272	A0A0B4LGX0	A0A0B4LGX0	-0.274843	-0.288035
1274	A0A0B4LGX0	A0A0B4LGX0	-0.214814	-0.209918
1282	A0A0B4LGZ6	A0A0B4LGZ6	-0.0572231	-0.121455
1293	A0A0B4LH25	A0A0B4LH25	-0.313146	-0.343831
1294	A0A0B4LH25	A0A0B4LH25	-0.490537	-0.529557
1295	A0A0B4LH25	A0A0B4LH25	-0.170244	-0.13414
1298	Q8SX98	Q8SX98	0.313093	0.339536
1302	A0A0B4LH99	A0A0B4LH99	-0.33878	-0.33756
1309	Q9W1I7	Q9W1I7	0.0227014	-0.0458307
1310	A0A0B4LHE7	A0A0B4LHE7	1.07751	1.03441
1319	A0A0B4LHR3	A0A0B4LHR3	-0.106855	-0.0834325
1321	A0A0B4LIP5	A0A0B4LIP5	0.167338	0.259764
1322	A0A0B4LHS9	A0A0B4LHS9	-0.169324	-0.147448
1323	A0A0B4LHT4	A0A0B4LHT4	0.0933336	0.108999
1325	A0A0B4LHV8	A0A0B4LHV8	-0.711819	-0.797051
1326	A0A0B4LJ12	A0A0B4LJ12	1.102	1.09517
1328	Q8IMF8	Q8IMF8	-0.621031	-0.491484
1329	A0A0B4LI25	A0A0B4LI25	-0.12459	-0.0960533
1332	A0A0B4LI25	A0A0B4LI25	-0.836333	-0.86099
1335	A0A0B4LI25	A0A0B4LI25	-0.550736	-0.52553
1337	Q9VDS7	Q9VDS7	0.769247	0.859406
1342	A0A0B7P9G0	A0A0B7P9G0	-0.292288	-0.296097
1347	Q0KHZ4	Q0KHZ4	-0.167384	-0.166268
1348	A0A0C4DHC2	A0A0C4DHC2	-0.175912	-0.091743
1355	A0A0C4DHE6	A0A0C4DHE6	-0.527807	-0.626727
1357	A0A0C4DHG2	A0A0C4DHG2	0.103451	0.0878734
1360	A0A0C4DHG5	A0A0C4DHG5	0.180574	0.111401
1366	A0A0C4DHG5	A0A0C4DHG5	0.585441	0.42883
1367	A0A0C4DHG5	A0A0C4DHG5	0.42097	0.28443
1376	Q9V3D8	Q9V3D8	0.0691865	0.016257
1378	A4V2A4	A4V2A4	-0.516803	-0.521939
1381	A0A0S0WIA2	A0A0S0WIA2	-0.0247817	-0.049042
1382	A0A0S0WIA2	A0A0S0WIA2	-0.0915892	-0.0978711
1383	A0A0S0WIA2	A0A0S0WIA2	0.044372	-0.028238
1384	A0A0S0WIA2	A0A0S0WIA2	-0.0810832	-0.127106
1385	A0A0S0WNN6	A0A0S0WNN6	-0.324418	-0.139953
1386	A0A0S0WNT6	A0A0S0WNT6	0.352703	0.386384
1387	A0A0S0X2W5;Q960D3	Q960D3	0.139786	0.203189
1388	A0A0S0X2W5;Q960D3	Q960D3	-0.191157	-0.148047
1389	A0A0S0X2W5	A0A0S0X2W5	0.511373	0.546592
1390	A0A0S0X2W5	A0A0S0X2W5	-0.0398061	-0.0529062
1392	A0A126BEE6	A0A126BEE6	0.212199	0.0915773
1393	A0A126BEE6	A0A126BEE6	0.1334	0.0877815
1396	A0A126BEE6	A0A126BEE6	-0.150053	0.176953
1397	A0A126BEE6	A0A126BEE6	-0.78531	-0.869724
1398	A0A126BEE6	A0A126BEE6	-1.08828	-1.22295
1399	A0A126BEE6	A0A126BEE6	-0.379265	-0.352764
1400	A0A126BEE6	A0A126BEE6	-0.312035	-0.437271
1401	A0A126BEE6	A0A126BEE6	-0.0468745	0.0185958
1402	A0A126BEE6	A0A126BEE6	0.825425	0.773002
1404	A0A126BEE6	A0A126BEE6	-0.0564324	-0.0384505
1406	A0A126GUQ5	A0A126GUQ5	-0.709479	-0.630293
1407	A0A126GUQ5	A0A126GUQ5	-1.76249	-1.5413
1408	A0A126GUQ5	A0A126GUQ5	-0.0950892	-0.119175
1413	A0A126GUT1	A0A126GUT1	-0.172369	-0.212684
1416	A0A126GUU0	A0A126GUU0	0.196218	0.208395
1421	A0A140SRF8	A0A140SRF8	-0.0672445	-0.137769
1423	A0A140SRF8	A0A140SRF8	0.670481	0.466748
1428	A0T1Z5	A0T1Z5	0.33688	0.470839
1429	A0T1Z5	A0T1Z5	0.024383	-0.102294
1432	A0T1Z5	A0T1Z5	-0.0471482	-0.0109854
1436	A1A708	A1A708	0.154757	0.14492
1437	A1A708	A1A708	0.605977	0.598348
1438	A1A708	A1A708	0.15346	0.14492
1441	A1A708	A1A708	-0.332414	-0.327853
1442	A1A708	A1A708	-0.360218	-0.355744
1445	A1A708	A1A708	0.0618107	0.0629556
1446	A1A708	A1A708	-0.226636	-0.231137
1447	A1A708	A1A708	-0.0834824	-0.0761876
1448	A1A708	A1A708	-0.208434	-0.301651
1457	A1Z6H4	A1Z6H4	-0.291509	-0.261127
1459	A1Z6H4	A1Z6H4	0.601078	0.586208
1462	A1Z6H4	A1Z6H4	-0.515726	-0.532257
1463	A1Z6H4	A1Z6H4	-0.4882	-0.469193
1472	A1Z6I7	A1Z6I7	0.0253636	0.0952651
1473	A1Z6I7	A1Z6I7	-0.0374704	0.00623076
1476	A1Z6I7	A1Z6I7	0.303834	0.330627
1477	A1Z6I7	A1Z6I7	0.292042	0.370759
1478	A1Z6I7	A1Z6I7	-0.782681	-0.746136
1479	A1Z6I7	A1Z6I7	0.0519415	0.194403
1480	A1Z6I7	A1Z6I7	0.171129	0.269054
1482	A1Z6I7	A1Z6I7	-0.0712945	-0.0402765
1485	A1Z6I7	A1Z6I7	-0.295471	-0.239431
1486	A1Z6I7	A1Z6I7	-0.0542256	-0.155951
1487	A1Z6X6	A1Z6X6	0.587763	0.528133
1488	A1Z6Z7	A1Z6Z7	-0.492808	-0.49728
1489	A1Z6Z7	A1Z6Z7	-0.220985	-0.255092
1490	A1Z6Z7	A1Z6Z7	-0.0380507	0.0059677
1499	A1Z6Z9	A1Z6Z9	0.169988	0.16036
1500	A1Z713	A1Z713	0.253782	0.269839
1502	A1Z713	A1Z713	-0.151372	-0.188897
1503	A1Z713	A1Z713	0.071877	0.0440453
1510	A1Z768	A1Z768	1.09911	1.56649
1519	A1Z7K6	A1Z7K6	-0.949115	-0.937834
1521	A1Z7L1	A1Z7L1	-1.13151	-0.799284
1522	A1Z7L1	A1Z7L1	-1.13151	-0.799284
1523	A1Z7P1	A1Z7P1	-0.254251	-0.288659
1526	A1Z7P3	A1Z7P3	-1.18701	-1.19037
1532	A1Z7Q8	A1Z7Q8	-0.0371268	0.0540712
1534	A1Z7Q8	A1Z7Q8	0.456805	0.458424
1535	A1Z7Q8	A1Z7Q8	-0.647768	-0.59453
1536	A1Z803	A1Z803	-0.0672798	-0.107094
1537	A1Z803	A1Z803	-0.0811957	0.0740111
1538	E1JH24	E1JH24	-0.347958	-0.319875
1539	E1JH24	E1JH24	0.0874091	0.12836
1543	A1Z898	A1Z898	0.317222	0.208842
1544	A1Z898	A1Z898	0.21221	0.315437
1545	A1Z898	A1Z898	-0.0993085	-0.157876
1546	A1Z898	A1Z898	0.522903	0.467024
1548	A1Z898	A1Z898	-0.240429	-0.233612
1557	A1Z8R2	A1Z8R2	-0.12442	-0.143856
1558	A1Z8R2	A1Z8R2	0.351475	0.350138
1559	A1Z8R2	A1Z8R2	-0.281331	-0.295841
1562	A1Z8R2	A1Z8R2	-0.465529	-0.392254
1563	A1Z8R2	A1Z8R2	-0.20796	-0.147057
1564	A1Z8R2	A1Z8R2	-0.0222727	0.0516718
1566	A1Z8R2	A1Z8R2	-0.197753	-0.187081
1570	A1Z8U7	A1Z8U7	0.300254	0.288065
1571	A1Z8U7	A1Z8U7	0.256305	0.231163
1572	A1Z8X0	A1Z8X0	0.36771	0.338815
1573	A1Z8X0	A1Z8X0	0.390606	0.388427
1574	A1Z909	A1Z909	-0.361264	-0.513919
1575	A1Z909	A1Z909	0.223876	0.00396946
1580	A1Z968	A1Z968	0.502391	0.510139
1581	A1Z968	A1Z968	0.421607	0.524164
1584	A1Z968	A1Z968	0.142294	0.1934
1587	A1Z968	A1Z968	-0.687523	-0.589947
1594	A1Z968	A1Z968	-0.4638	-0.608519
1600	A1Z987	A1Z987	-0.0809227	-0.0769467
1602	A1Z987	A1Z987	-0.802526	-0.691712
1613	A1Z9G2	A1Z9G2	-0.914008	-0.85006
1617	B7YZG4;A1Z9J3	A1Z9J3	-0.166451	-0.174438
1618	B7YZG4;A1Z9J3	A1Z9J3	-0.166451	-0.174438
1624	A1Z9L3	A1Z9L3	-0.111443	-0.13487
1631	A1Z9S6	A1Z9S6	0.0350741	-0.0682139
1632	A1Z9S6	A1Z9S6	-0.119934	-0.0496095
1633	A1Z9S6	A1Z9S6	-0.221443	-0.187845
1636	A1Z9S6	A1Z9S6	-0.192954	-0.16661
1637	A1Z9S6	A1Z9S6	0.951905	0.912588
1641	A1Z9S6	A1Z9S6	0.270975	0.25428
1642	A1Z9S6	A1Z9S6	0.123604	0.0299017
1643	A1Z9S6	A1Z9S6	-0.458155	-0.426733
1644	A1Z9S6	A1Z9S6	-0.0597017	-0.140687
1646	A1Z9S6	A1Z9S6	0.256684	0.290204
1649	A1Z9S6	A1Z9S6	0.0847566	0.0979483
1651	A1Z9S6	A1Z9S6	-0.310232	-0.265976
1658	A1ZA22	A1ZA22	-0.198488	-0.247409
1660	A1ZA92	A1ZA92	0.0583296	0.0360963
1661	A1ZA92	A1ZA92	0.342422	0.354336
1665	Q8IFW6	Q8IFW6	0.119626	-5.05148e-05
1666	Q8IFW6	Q8IFW6	-0.374792	-0.341122
1667	Q8IFW6	Q8IFW6	-0.148522	-0.150738
1669	Q8IFW6	Q8IFW6	0.371971	0.371688
1670	Q8IFW6	Q8IFW6	0.0347911	-0.0392778
1671	Q8IFW6	Q8IFW6	-0.341495	-0.32822
1672	Q8IFW6	Q8IFW6	-0.303982	-0.402082
1676	Q8IFW6	Q8IFW6	0.0696	0.511368
1683	A1ZAK7	A1ZAK7	-0.117421	-0.131839
1685	A1ZAK7	A1ZAK7	-0.319965	-0.31672
1694	A1ZAN2	A1ZAN2	-1.07557	-0.97874
1697	A1ZAS3	A1ZAS3	0.0575907	0.0322098
1701	Q9NDR1	Q9NDR1	0.102238	0.102496
1703	A1ZAT5	A1ZAT5	-0.355556	-0.353287
1707	A1ZAW3	A1ZAW3	-0.238922	-0.210609
1709	A1ZAW3	A1ZAW3	0.177688	0.162788
1711	A1ZAW3	A1ZAW3	0.312709	0.372815
1713	A1ZAW3	A1ZAW3	0.533999	0.519623
1715	A1ZAW3	A1ZAW3	0.448218	0.419578
1721	B3DN64	B3DN64	-0.379991	-0.391751
1723	A8E6M1	A8E6M1	-0.013218	-0.0882058
1724	A8E6M1	A8E6M1	-0.0470761	-0.0697808
1726	A8E6M1	A8E6M1	0.140631	0.0863134
1728	A8E6M1	A8E6M1	-0.269536	-0.126471
1731	A8E6M1	A8E6M1	-0.971966	-0.921537
1733	A8E6M1	A8E6M1	0.00398794	-0.0280722
1734	A8E6M1	A8E6M1	-0.0622817	-0.110092
1738	A8E6M1	A8E6M1	-0.126642	-0.203058
1739	A8E6M1	A8E6M1	0.389266	0.381525
1741	A8E6M1	A8E6M1	3.05986	3.05392
1743	A1ZBE9	A1ZBE9	0.3244	0.312101
1744	A1ZBE9	A1ZBE9	0.0381642	0.0341784
1745	A1ZBF1	A1ZBF1	-0.156478	-0.138491
1749	A1ZBH1	A1ZBH1	0.109114	0.132915
1755	A1ZBH8	A1ZBH8	0.0163865	0.0173284
1770	Q963E6	Q963E6	-1.11163	-1.07614
1776	A1ZBT6	A1ZBT6	-0.198613	-0.162228
1777	A1ZBT6	A1ZBT6	-0.198613	-0.162228
1786	A1ZBT6	A1ZBT6	-0.668732	-0.618095
1791	A1ZBW6	A1ZBW6	0.126053	0.234775
1794	A1ZBW6	A1ZBW6	0.117599	0.191638
1795	A1ZBW7	A1ZBW7	-0.196877	-0.40897
1798	A1ZBW7	A1ZBW7	-0.771307	-0.96378
1799	A1ZBW7	A1ZBW7	-0.0919546	-0.119886
1804	A1ZBW7	A1ZBW7	0.790434	0.610148
1808	A1ZBW7	A1ZBW7	-0.355797	-0.374043
1811	A1ZBW7	A1ZBW7	-0.150689	-0.16873
1812	A1ZBW7	A1ZBW7	-0.0901228	-0.0825388
1819	Q9W061	Q9W061	0.977743	0.799207
1822	Q9W061	Q9W061	0.245854	0.268267
1823	Q9W061	Q9W061	-0.105413	-0.112929
1827	A2VEG3	A2VEG3	0.364637	0.32478
1835	A2VEY9	A2VEY9	0.0797691	0.155026
1837	A4UZZ4	A4UZZ4	-0.301828	-0.357935
1839	A4V0R4	A4V0R4	0.0643868	0.101014
1840	A4V0R4	A4V0R4	0.107475	0.168594
1841	A4V0R4	A4V0R4	0.105985	0.111118
1845	A4V0R4	A4V0R4	0.103017	0.0402446
1846	A4V0R4	A4V0R4	-0.00650842	-0.0698736
1849	A4V110	A4V110	-0.054558	-0.00617327
1850	A4V166	A4V166	0.115473	0.0888782
1853	A4V1B2	A4V1B2	-0.232239	-0.221129
1854	A4V1B2	A4V1B2	-0.310054	-0.279739
1855	A4V1B2	A4V1B2	-0.313355	-0.263841
1856	A4V1B2	A4V1B2	-0.0830296	-0.126953
1857	A4V1Y7	A4V1Y7	-0.108329	-0.0661306
1861	M9PGA6	M9PGA6	-0.11958	0.0147798
1875	A4V2K7	A4V2K7	0.400823	0.391998
1876	A4V2K7	A4V2K7	0.544596	0.543302
1881	A4V2K7	A4V2K7	-0.259697	-0.201325
1882	A4V2K7	A4V2K7	-0.572395	-0.536679
1883	A4V2K7	A4V2K7	-0.591707	-0.659275
1884	A4V2K7	A4V2K7	0.0935352	0.0922116
1885	A4V2K7	A4V2K7	-0.252895	-0.296234
1886	A4V2K7	A4V2K7	0.290405	0.333028
1887	A4V2K7	A4V2K7	-0.257589	-0.203253
1888	A4V303	A4V303	-0.0266381	-0.0193805
1889	A4V346	A4V346	0.0327521	0.109604
1893	A4V3G8	A4V3G8	-0.300585	0.140653
1895	A4V3G8	A4V3G8	-0.394641	-0.297263
1896	A4V3G8	A4V3G8	0.675836	0.562034
1898	A4V3G8	A4V3G8	0.188815	0.0657346
1900	A4V3G8	A4V3G8	0.500225	0.421165
1901	A4V3G8	A4V3G8	0.106573	0.0417412
1903	A4V3G8	A4V3G8	-0.0404777	-0.109415
1904	A4V3G8	A4V3G8	-0.403559	-0.369794
1905	A4V3G8	A4V3G8	0.179313	0.0903009
1907	A4V3J6	A4V3J6	-0.0869677	-0.0500538
1908	B7Z0R6	B7Z0R6	0.0890197	0.0633348
1915	B7Z0R6	B7Z0R6	0.213324	0.403505
1916	B7Z0R6	B7Z0R6	0.425247	0.628824
1923	A4V3W2	A4V3W2	0.155632	0.219655
1926	A4V3W8	A4V3W8	-1.03445	-0.981028
1928	A4V3W8	A4V3W8	-0.0684094	-0.126157
1929	A4V3W8	A4V3W8	-0.164963	-0.255477
1933	A4V448	A4V448	0.438898	0.516458
1934	A4V488	A4V488	0.148507	0.242604
1935	A4V4A1	A4V4A1	0.836367	0.778825
1936	A4V4A1	A4V4A1	-0.44585	-0.335905
1943	Q9TW12	Q9TW12	-0.558016	-0.624101
1956	Q0E8U6	Q0E8U6	-1.18945	-1.1618
1964	Q9VMS2	Q9VMS2	0.0822735	0.126062
1971	A8DYW2	A8DYW2	-0.163892	-0.0281003
1973	A8DYW2	A8DYW2	-0.189422	-0.0550121
1976	X2JDY7	X2JDY7	0.108747	0.00099525
1980	Q9VJI6	Q9VJI6	0.15057	0.175771
1981	Q9VJI6	Q9VJI6	0.297067	0.298994
1985	O61380	O61380	-0.212434	-0.142591
1987	O61380	O61380	0.100406	0.106195
1988	O61380	O61380	0.153353	0.179461
1990	O61380	O61380	-0.10537	-0.124392
1991	O61380	O61380	0.00297076	-0.0112122
2009	O61380	O61380	-0.0987451	-0.0839861
2013	M9PBL6	M9PBL6	0.0309067	0.0103409
2014	M9PBL6	M9PBL6	-0.296729	-0.344398
2018	M9PBL6	M9PBL6	0.0182962	0.0152534
2020	M9PBL6	M9PBL6	-0.308983	-0.262039
2021	M9PBL6	M9PBL6	0.318089	0.292612
2029	M9PE05	M9PE05	-0.209996	-0.182086
2034	M9PE05	M9PE05	-0.452293	-0.363574
2044	M9PEM7	M9PEM7	0.248228	0.335202
2050	Q9V3C7	Q9V3C7	-0.405189	-0.347656
2059	Q9V3C7	Q9V3C7	-0.653562	-0.60293
2060	B7Z0G0	B7Z0G0	0.264471	0.0932252
2063	X2JGR4	X2JGR4	-0.0560346	-0.0695794
2065	A8JNV4	A8JNV4	-0.194097	-0.271966
2069	A8JNV5	A8JNV5	-0.162884	-0.165575
2079	A8JR89	A8JR89	0.0461079	0.0180686
2080	A8JR89	A8JR89	0.0676655	0.0767492
2081	A8JRA4	A8JRA4	0.0433185	0.0136747
2088	M9PHJ6	M9PHJ6	0.0488649	0.0267703
2090	A8JUS8	A8JUS8	-0.225727	-0.176018
2093	A8JUY0	A8JUY0	0.603799	0.10891
2094	A8JUY0	A8JUY0	0.00285571	-0.0663279
2095	A8JUY0	A8JUY0	-0.251205	-0.358618
2096	A8JUY0	A8JUY0	-0.0802006	-0.118584
2097	A8JUY0	A8JUY0	-0.0927723	-0.0750512
2098	A8JUY0	A8JUY0	0.0588048	0.0394744
2105	A8JV07	A8JV07	0.511204	0.470396
2106	A8JV07	A8JV07	0.1244	0.0913131
2107	A8JV07	A8JV07	-0.44005	-0.438638
2108	A8JV07	A8JV07	0.162102	0.111817
2125	A8JV07	A8JV07	0.781228	0.636261
2126	A8JV07	A8JV07	0.443147	0.389354
2127	A8JV07	A8JV07	0.0619264	-0.0975682
2134	Q9W3W1	Q9W3W1	0.315478	0.313057
2135	Q9W3W1	Q9W3W1	0.0746245	0.147872
2137	Q9W3W1	Q9W3W1	-0.167475	-0.205023
2138	Q9W3W1	Q9W3W1	-0.0325663	-0.0594109
2142	A8JV18	A8JV18	-0.963101	-0.735411
2145	A8JV18	A8JV18	-1.10381	-1.07582
2154	B3DN56	B3DN56	-0.000747411	0.0695596
2157	B4F5U4	B4F5U4	-0.205633	-0.168966
2159	B5RJJ4	B5RJJ4	-0.0992077	-0.0514232
2160	B5RJJ4	B5RJJ4	-0.589173	-0.641861
2161	B5RJS0	B5RJS0	0.389874	0.419328
2162	B5RJS0	B5RJS0	0.193549	0.150233
2173	B5RJS0	B5RJS0	-0.436307	-0.475549
2174	B5RJS0	B5RJS0	-0.297938	-0.32761
2175	B6IDN2	B6IDN2	-0.0664738	-0.0850812
2177	M9PFW2	M9PFW2	0.0576662	0.07838
2182	B7YZQ1	B7YZQ1	0.418208	0.31183
2184	B7YZQ1	B7YZQ1	0.235	0.244385
2185	B7YZQ7	B7YZQ7	0.0251512	-0.00909044
2186	Q0E8W0	Q0E8W0	0.409539	0.3364
2187	B7YZR7	B7YZR7	-0.149905	-0.135792
2189	B7YZV0	B7YZV0	-0.0361424	-0.304401
2204	B7YZW8	B7YZW8	-0.0689088	0.0196982
2206	B7YZW8	B7YZW8	0.525769	0.479618
2207	B7YZW8	B7YZW8	0.346387	0.408038
2208	B7YZW8	B7YZW8	0.346387	0.408038
2213	B7YZW8	B7YZW8	-0.561506	-0.555038
2220	B7YZY0	B7YZY0	-0.170356	-0.183291
2221	B7YZZ9	B7YZZ9	-0.0462261	-0.00567258
2222	B7YZZ9	B7YZZ9	0.236582	0.199188
2223	B7YZZ9	B7YZZ9	0.220411	0.230444
2224	B7YZZ9	B7YZZ9	0.258858	0.168574
2226	B7YZZ9	B7YZZ9	-0.203079	-0.131174
2227	B7YZZ9	B7YZZ9	0.138506	0.0642972
2228	B7YZZ9	B7YZZ9	-0.599345	-0.52057
2229	B7YZZ9	B7YZZ9	0.204455	0.303459
2233	B7Z002	B7Z002	0.491674	0.498303
2235	B7Z002	B7Z002	-0.205175	-0.20969
2238	B7Z002	B7Z002	-1.92446	-1.91283
2239	B7Z002	B7Z002	-0.225583	-0.376736
2240	B7Z002	B7Z002	0.106362	0.0159259
2244	B7Z002	B7Z002	-0.30346	-0.247702
2245	B7Z002	B7Z002	-0.637859	-0.693018
2250	B7Z002	B7Z002	-0.0319768	-0.0783096
2251	B7Z002	B7Z002	-0.978464	-1.3175
2252	B7Z002	B7Z002	-0.106478	-0.0828628
2255	B7Z002	B7Z002	-0.221171	-0.190397
2256	B7Z002	B7Z002	0.694217	0.740371
2257	B7Z002	B7Z002	0.592228	0.640121
2258	B7Z002	B7Z002	-0.0693486	-0.196493
2259	B7Z002	B7Z002	-0.186216	-0.190621
2260	B7Z002	B7Z002	0.199962	0.227057
2261	B7Z002	B7Z002	-0.159978	-0.244462
2264	B7Z002	B7Z002	-0.14673	-0.0795502
2265	B7Z002	B7Z002	-0.464757	-0.484446
2269	B7Z002	B7Z002	-0.0938223	-0.0679645
2270	B7Z002	B7Z002	0.598077	0.643576
2271	B7Z002	B7Z002	-0.657783	-0.488459
2272	B7Z002	B7Z002	-0.0586478	0.0634397
2275	B7Z002	B7Z002	-0.833232	-0.777015
2276	B7Z002	B7Z002	0.169485	0.418259
2277	B7Z002	B7Z002	-0.33114	-0.245532
2284	B7Z002	B7Z002	-0.050609	-0.113039
2285	B7Z002	B7Z002	0.170799	0.191852
2286	B7Z002	B7Z002	0.097304	0.12788
2291	B7Z002	B7Z002	-0.608084	-0.633758
2294	B7Z026	B7Z026	-0.0388945	-0.053952
2310	M9MRW2	M9MRW2	0.185372	0.165251
2315	M9MRW2	M9MRW2	0.291312	0.264197
2316	B7Z066	B7Z066	0.18585	0.225388
2320	B7Z067	B7Z067	-0.586118	-0.566638
2326	B7Z098	B7Z098	-0.140095	-0.110357
2327	B7Z0B0	B7Z0B0	-0.0164443	-0.0252326
2328	B7Z0B0	B7Z0B0	0.176093	0.160429
2329	B7Z0B0	B7Z0B0	-0.43648	-0.408094
2332	B7Z0B0	B7Z0B0	-0.350459	-0.253663
2333	B7Z0B0	B7Z0B0	0.90525	1.01197
2338	B7Z0D7	B7Z0D7	0.299197	-0.088671
2339	B7Z0D7	B7Z0D7	0.299197	-0.088671
2343	B7Z0D7	B7Z0D7	0.162393	0.134604
2344	B7Z0D7	B7Z0D7	0.0101827	-0.0151472
2348	B7Z0E2	B7Z0E2	0.221007	0.227745
2350	B7Z0E2	B7Z0E2	-0.287931	-0.244095
2356	M9PFR5	M9PFR5	-0.140298	-0.190868
2357	M9PFR5	M9PFR5	0.235088	0.0934432
2359	B7Z0I7	B7Z0I7	-0.484966	-0.433805
2365	B7Z0I8	B7Z0I8	-0.149825	-0.119314
2366	B7Z0I8	B7Z0I8	-0.242473	-0.160441
2367	B7Z0I8	B7Z0I8	-0.171157	-0.190568
2371	B7Z0I8	B7Z0I8	-0.213915	-0.248612
2373	B7Z0I8	B7Z0I8	0.368105	0.448015
2375	B7Z0I8	B7Z0I8	0.0406349	0.0482244
2376	B7Z0I8	B7Z0I8	0.234315	0.161374
2387	B7Z0I8	B7Z0I8	-0.308573	-0.409335
2389	B7Z0I8	B7Z0I8	-0.0922361	-0.174073
2390	B7Z0I8	B7Z0I8	0.283956	0.270992
2391	B7Z0I8	B7Z0I8	-0.0368773	-0.0143352
2394	B7Z0I8	B7Z0I8	-0.791418	-0.792195
2395	B7Z0I8	B7Z0I8	0.244091	0.309412
2397	B7Z0I8	B7Z0I8	-0.999438	-0.986024
2398	B7Z0I8	B7Z0I8	0.195878	0.235339
2404	B7Z0I8	B7Z0I8	0.427866	0.390158
2405	B7Z0I8	B7Z0I8	0.114347	-0.0196985
2407	B7Z0I8	B7Z0I8	0.137924	0.185537
2408	B7Z0I8	B7Z0I8	-0.154309	-0.277273
2413	B7Z0I8	B7Z0I8	-0.639985	-0.523165
2421	B7Z0I8	B7Z0I8	-0.299766	-0.383457
2424	B7Z0I8	B7Z0I8	-0.538704	-0.493379
2425	B7Z0I8	B7Z0I8	-0.332552	-0.297238
2429	B7Z0I8	B7Z0I8	-0.235585	-0.244146
2431	B7Z0I8	B7Z0I8	-0.111739	-0.0847143
2433	B7Z0I8	B7Z0I8	-0.260575	-0.474152
2434	B7Z0I8	B7Z0I8	-0.38696	-0.332321
2436	B7Z0I8	B7Z0I8	0.55198	0.524687
2438	B7Z0I8	B7Z0I8	-0.224552	-0.410045
2439	B7Z0I8	B7Z0I8	0.0604228	0.0324466
2442	B7Z0I8	B7Z0I8	-0.316603	-0.353363
2443	B7Z0I8	B7Z0I8	-0.0619335	-0.00927752
2445	B7Z0I8	B7Z0I8	-0.0641564	-0.0754866
2446	B7Z0J4	B7Z0J4	-0.330837	-0.253298
2453	B7Z0V1	B7Z0V1	-0.517913	-0.522285
2459	B7Z0V1	B7Z0V1	-0.0803753	-0.0492474
2460	Q9VI13	Q9VI13	-0.0956062	-0.108362
2461	Q9VI13	Q9VI13	0.18966	0.174474
2464	B7Z131	B7Z131	-0.180008	-0.208259
2472	Q9VYL7	Q9VYL7	0.295833	0.361447
2477	Q9VI18	Q9VI18	-0.198787	-0.135158
2478	Q9VI18	Q9VI18	-0.921191	-1.003
2479	Q9VI18	Q9VI18	-0.157659	-0.0919075
2484	Q9I7R0	Q9I7R0	-0.440385	-0.545186
2485	E2QD63	E2QD63	0.0125801	0.00985394
2486	E2QD63	E2QD63	-0.0657337	-0.0874036
2487	E2QD63	E2QD63	-0.110067	-0.150238
2488	E2QD63	E2QD63	0.062706	0.0895214
2489	E2QD63	E2QD63	0.256141	0.273229
2490	E2QD63	E2QD63	0.109596	0.140269
2492	M9PHW9	M9PHW9	-0.218843	-0.22225
2493	M9PHW9	M9PHW9	-0.151074	-0.222589
2494	M9PHW9	M9PHW9	-0.161345	-0.261038
2495	M9PHW9	M9PHW9	-0.493369	-0.447686
2496	C6SV09	C6SV09	2.00641	2.23029
2497	C6SV09	C6SV09	2.00641	2.23029
2498	X2J9A4	X2J9A4	-0.360012	-0.413634
2499	X2J9A4	X2J9A4	-0.637188	-0.450082
2501	C7LA75;P29843	C7LA75	-0.231728	-0.200972
2502	C7LA75	C7LA75	0.252702	0.329067
2503	C7LA75;P29843	C7LA75	0.402646	0.417756
2507	E1JJ68	E1JJ68	0.196455	0.197635
2513	C7LAG1;Q59E36	Q59E36	0.416738	0.463161
2514	C7LAG1;Q59E36	Q59E36	0.416738	0.467971
2515	C7LAG1;Q59E36	Q59E36	0.379178	-0.0386429
2516	C7LAG1;Q59E36	Q59E36	-0.214103	-0.156284
2517	C7LAG1;Q59E36	Q59E36	0.000193764	0.149513
2519	M9PHG2	M9PHG2	0.263795	0.23949
2535	M9PG83	M9PG83	0.0562112	0.00923092
2542	D0Z760	D0Z760	0.240962	0.26498
2545	D0Z760	D0Z760	-0.178661	-0.138587
2549	D0Z760	D0Z760	-0.00441489	0.0845485
2551	D0Z760	D0Z760	0.24889	0.410265
2553	D0Z760	D0Z760	-0.0582148	-0.0704884
2559	D3DMM4	D3DMM4	-0.126647	0.218057
2562	D3PFH9	D3PFH9	-0.490052	-0.384839
2570	D3PFH9	D3PFH9	-0.29383	-0.331271
2576	E1JGK6	E1JGK6	0.992722	0.965343
2581	E1JGV6	E1JGV6	0.0825517	0.0821873
2585	E1JGX3	E1JGX3	0.533944	0.625728
2586	E1JGX3	E1JGX3	0.635944	0.708444
2587	E1JGX3	E1JGX3	0.0292471	0.0182471
2599	E1JH57	E1JH57	0.121315	0.135788
2600	E1JH57	E1JH57	-0.068328	-0.00506121
2603	E1JHA4	E1JHA4	-0.20846	-0.190256
2604	E1JHA4	E1JHA4	-0.310002	-0.314626
2605	E1JHA4	E1JHA4	-0.0337347	-0.0979134
2607	E1JHA4	E1JHA4	-0.665128	-0.583464
2610	E1JHE1	E1JHE1	-0.43765	-0.412827
2611	E1JHE1	E1JHE1	-0.0633049	-0.0740016
2612	E1JHE1	E1JHE1	-0.563833	-0.62827
2613	E1JHE1	E1JHE1	-0.13348	-0.165361
2622	E1JHM0	E1JHM0	-0.207952	-0.168625
2627	E1JHM0	E1JHM0	0.87903	0.85724
2642	Q9VMV9	Q9VMV9	-0.103381	-0.073035
2643	Q9VMV9	Q9VMV9	-0.650274	-0.595806
2646	Q9VMV9	Q9VMV9	-0.517924	-0.464078
2647	Q9VMV9	Q9VMV9	-0.267112	-0.169137
2648	Q9VMV9	Q9VMV9	-0.0416753	0.0194413
2650	M9PE12	M9PE12	-0.113385	-0.142163
2657	M9PE12	M9PE12	-0.123198	-0.090285
2660	M9PE12	M9PE12	-0.738944	-0.337624
2662	E1JHX5	E1JHX5	0.115258	0.159072
2664	E1JHX5	E1JHX5	-0.0237347	-0.056887
2675	M9PIA6	M9PIA6	-0.0100154	0.00537314
2676	M9PIA6	M9PIA6	0.215032	0.0709961
2677	M9PIA6	M9PIA6	0.489337	0.43239
2678	M9PIA6	M9PIA6	0.139831	0.115622
2679	M9PIA6	M9PIA6	-0.168777	-0.304575
2680	M9PIA6	M9PIA6	-0.0173548	-0.0153166
2681	M9PIA6	M9PIA6	0.274865	0.367088
2682	M9PIA6	M9PIA6	-0.400457	-0.335692
2683	M9PIA6	M9PIA6	-0.00911086	-0.0320503
2684	M9PIA6	M9PIA6	0.197093	0.293294
2690	E1JI59;Q6U9V3	E1JI59	-0.000521131	0.0491904
2692	E1JI78	E1JI78	0.102468	0.0977506
2695	Q8MRH9	Q8MRH9	-0.425023	-0.587659
2700	E1JIB9;X2JG79	E1JIB9	-0.392336	-0.368977
2702	E1JIB9;X2JG79	E1JIB9	-0.69519	-0.71389
2703	E1JIB9;X2JG79	E1JIB9	-0.117045	-0.0335189
2705	E1JIB9;X2JG79	E1JIB9	-0.658574	-0.653151
2707	E1JIB9;X2JG79	E1JIB9	0.197462	0.235774
2708	E1JIB9;X2JG79	E1JIB9	0.0154418	0.0420141
2711	E1JIB9;X2JG79	E1JIB9	-0.0734241	-0.052389
2713	E1JIB9;X2JG79	E1JIB9	-0.0894687	-0.131649
2719	Q961C3	Q961C3	-0.650174	-0.60445
2726	E1JIJ9	E1JIJ9	-0.00524317	-0.0492211
2728	E1JIJ9	E1JIJ9	-0.225206	-0.389902
2729	E1JIJ9	E1JIJ9	0.937776	0.998762
2732	E1JIJ9	E1JIJ9	0.264117	0.24078
2739	E1JIK0	E1JIK0	0.102546	0.0731523
2740	E1JIK0	E1JIK0	0.16076	0.134557
2741	E1JIL4;Q24572	Q24572	0.1167	0.129189
2744	E8NH59	E8NH59	-0.173038	-0.16672
2745	E8NH59	E8NH59	0.177535	0.151716
2767	E1JJ73	E1JJ73	-0.0912225	-0.114977
2770	E1JJF4	E1JJF4	-0.261797	-0.387575
2771	E1JJF4	E1JJF4	-0.0153447	-0.0872905
2780	E1JJK8	E1JJK8	-1.36044	-1.41676
2784	E1JJM8	E1JJM8	0.0265857	-0.0686375
2787	E1JJM8	E1JJM8	-0.0780418	-0.22934
2795	M9PF12	M9PF12	0.281785	0.365431
2796	E1JJN9	E1JJN9	-0.122301	-0.18129
2797	E1JJN9	E1JJN9	0.0860968	0.0370184
2798	E1JJN9	E1JJN9	-0.16609	-0.115656
2799	E1JJN9	E1JJN9	0.829007	1.36369
2800	E1JJN9	E1JJN9	-0.533716	-0.303038
2803	E1JJN9	E1JJN9	0.164283	0.128435
2805	E1JJN9	E1JJN9	0.915313	0.925779
2807	E1JJN9	E1JJN9	-0.297512	-0.1992
2814	Q9VWI1	Q9VWI1	-0.312866	-0.36754
2815	Q9VWI1	Q9VWI1	-1.25847	-1.29813
2818	E1JJS2	E1JJS2	1.07142	1.12323
2820	E1JJS2	E1JJS2	-0.709017	-0.668001
2822	E2QC56	E2QC56	-0.00546623	-0.0426469
2826	E2QC56	E2QC56	0.0195449	0.0182615
2830	E2QC56	E2QC56	-0.0595319	0.0236327
2836	E2QC61	E2QC61	0.0730142	0.220376
2837	E2QC61	E2QC61	0.277052	0.177446
2845	E2QCK0	E2QCK0	-0.682234	-0.572672
2846	E2QCK0	E2QCK0	-0.388028	-0.358407
2849	E2QCK0	E2QCK0	-0.807372	-0.704003
2854	Q9VQ76	Q9VQ76	-0.210458	-0.135568
2866	Q9VQ76	Q9VQ76	0.48221	0.606272
2869	Q9VQ76	Q9VQ76	-0.10635	-0.148255
2870	Q9VQ76	Q9VQ76	-0.135563	-0.126507
2871	Q9VQ76	Q9VQ76	-0.0879719	-0.0614168
2874	E2QCZ5	E2QCZ5	-0.135585	-0.0289062
2882	E2QD65	E2QD65	0.143194	0.138459
2891	E4NKG1	E4NKG1	0.122758	0.121945
2893	E4NKG1	E4NKG1	-0.505928	-0.430835
2904	F0JAF7	F0JAF7	0.400913	0.393843
2915	Q8IRC1	Q8IRC1	0.164279	0.136137
2916	Q8IRC1	Q8IRC1	0.0460683	0.0926575
2917	Q8IRC1	Q8IRC1	-0.292109	-0.262898
2919	Q8IRC1	Q8IRC1	-0.187028	-0.0983957
2921	Q8IRC1	Q8IRC1	-0.052082	0.0165262
2924	F3YDJ5	F3YDJ5	0.422894	0.431525
2926	F6J1D0	F6J1D0	-0.125553	-0.127407
2928	G3M3A2	G3M3A2	0.0226255	-0.0589835
2931	G4LTX1	G4LTX1	0.320664	0.299857
2936	H0RNK7	H0RNK7	-0.230947	-0.474497
2946	H0RNK7	H0RNK7	0.401674	0.358122
2947	H0RNK7	H0RNK7	0.1201	0.0276849
2954	H0RNN8	H0RNN8	-0.453061	-0.330576
2955	H1UUB1	H1UUB1	-0.680047	-0.55288
2957	H1UUB1	H1UUB1	0.0850138	0.0825806
2958	H1UUI2	H1UUI2	-0.279097	-0.246094
2961	M9NDX8	M9NDX8	-0.397133	-0.286608
2963	M9NDX8	M9NDX8	-0.378575	-0.320117
2964	M9NDX8	M9NDX8	0.528216	0.52257
2967	M9NDX8	M9NDX8	-0.167269	-0.15333
2970	M9NDX8	M9NDX8	0.56238	0.264802
2971	M9NDX8	M9NDX8	0.56238	0.264802
2972	M9NDX8	M9NDX8	-0.188428	-0.145813
2975	M9NDX8	M9NDX8	-0.270768	-0.320424
2976	M9NDX8	M9NDX8	-0.287511	-0.337757
2979	M9NDX8	M9NDX8	-0.257008	-0.323339
2981	M9NDX8	M9NDX8	-0.145849	-0.154065
2986	M9NDX8	M9NDX8	-0.373711	-0.418664
2987	M9NDX8	M9NDX8	-0.350675	-0.398329
2995	M9NDX8	M9NDX8	-0.178118	-0.200064
2996	M9NDX8	M9NDX8	0.393518	0.374413
3002	M9MQH9	M9MQH9	-0.647378	-0.665074
3003	M9MQH9	M9MQH9	0.17848	0.174674
3006	H8F4V5	H8F4V5	0.0105077	-0.000759967
3007	H9XVM7	H9XVM7	0.19741	0.179376
3012	L0MLP2	L0MLP2	-0.581883	-0.637734
3013	L0MLP2	L0MLP2	-0.878513	-0.754657
3015	L0MLP2	L0MLP2	-0.147381	-0.0927088
3016	L0MLP2	L0MLP2	0.0323267	0.131084
3021	L0MLP2	L0MLP2	-0.23303	-0.31036
3023	L0MLQ9	L0MLQ9	-0.0408214	0.0437177
3024	L0MLQ9	L0MLQ9	-0.151292	-0.121065
3025	L0MLQ9	L0MLQ9	-0.322261	-0.307976
3026	L0MLQ9	L0MLQ9	-0.294161	-0.172486
3030	L0MLQ9	L0MLQ9	-0.760952	-0.763024
3034	L0MLQ9	L0MLQ9	-0.577341	-0.688263
3036	L0MN84	L0MN84	-0.338837	-0.324032
3037	L0MPR2	L0MPR2	0.2017	0.118062
3038	L0MPS3	L0MPS3	0.0894746	0.0971736
3041	L0MPS3	L0MPS3	0.248109	0.142223
3046	M9MRD3	M9MRD3	-0.273805	-0.335423
3050	M9MRD3	M9MRD3	0.0536145	0.0770323
3071	X2JDP6	X2JDP6	0.208155	0.107901
3072	X2JDP6	X2JDP6	-0.265738	-0.150032
3073	X2JDP6	X2JDP6	0.033744	0.0785876
3075	M9PCJ7	M9PCJ7	-0.0909336	-0.130285
3076	M9PCJ7	M9PCJ7	0.192894	0.133349
3077	M9PCJ7	M9PCJ7	0.585091	0.661997
3080	Q8IPB9	Q8IPB9	0.204121	0.206102
3081	Q8IPB9	Q8IPB9	-0.0950122	-0.089745
3085	M9MRK1	M9MRK1	-0.347504	-0.247768
3088	M9MRK1	M9MRK1	-0.242961	-0.292469
3089	M9MSI8	M9MSI8	0.234491	0.315805
3095	M9MRQ9	M9MRQ9	-0.0727816	-0.0544918
3096	M9MRQ9	M9MRQ9	0.144432	0.143125
3103	M9MRW4	M9MRW4	-0.371962	-0.432854
3112	M9MS02	M9MS02	-0.221583	-0.159377
3117	M9MS15	M9MS15	-0.567688	-0.480299
3118	M9MS15	M9MS15	-0.107712	-0.0836074
3120	M9MS15	M9MS15	0.212315	0.215689
3121	M9MS15	M9MS15	-0.151499	-0.258982
3123	M9MS15	M9MS15	0.00319499	-0.00163553
3124	M9MS15	M9MS15	-0.193987	-0.244384
3142	M9MSE8	M9MSE8	-0.0765241	-0.0829832
3146	M9MSE8	M9MSE8	2.76327	2.76395
3152	M9PCK8	M9PCK8	-0.0143033	0.0822575
3166	M9NCM6	M9NCM6	-0.394794	-0.311881
3167	M9NCM6	M9NCM6	-0.468233	-0.502927
3169	M9NCM6	M9NCM6	-0.674041	-0.669041
3171	M9NCM6	M9NCM6	0.131323	0.0923514
3173	M9NCM6	M9NCM6	0.0512868	0.0167701
3174	M9NCM6	M9NCM6	-0.0120056	-0.0545878
3175	M9NCM6	M9NCM6	0.00776586	-0.015475
3176	M9NCM6	M9NCM6	-0.228521	-0.227361
3177	M9NCM6	M9NCM6	-0.278062	-0.247096
3178	M9NCM6	M9NCM6	-0.278062	-0.28184
3180	M9NCM6	M9NCM6	0.043291	0.0638584
3181	M9NCM6	M9NCM6	-0.0456073	-0.00831283
3182	M9NCM6	M9NCM6	-0.436458	-0.313526
3183	M9NCM6	M9NCM6	-0.436458	-0.313526
3186	M9NCM6	M9NCM6	-0.252292	-0.192691
3191	M9NCM6	M9NCM6	0.0523239	0.11209
3197	M9NCM6	M9NCM6	0.00233021	0.0382437
3204	M9NCM6	M9NCM6	-0.136257	-0.204438
3205	M9NCM6	M9NCM6	-0.217561	-0.24298
3206	M9NCM6	M9NCM6	-0.154936	-0.188441
3215	M9NCM6	M9NCM6	-0.616348	-0.577023
3218	M9NCX1	M9NCX1	0.136517	0.135929
3220	M9NCX1	M9NCX1	-0.250868	-0.281244
3224	M9NCX1	M9NCX1	0.0112009	-0.0182437
3225	M9NCX1	M9NCX1	0.291011	0.282531
3230	M9NCX1	M9NCX1	0.353587	0.362307
3231	M9NCX1	M9NCX1	0.422585	0.346388
3232	M9PDV1	M9PDV1	-0.630271	-0.747394
3233	M9PDV1	M9PDV1	1.46372	1.54398
3234	M9PBF6	M9PBF6	0.0464696	0.14101
3245	M9ND37	M9ND37	1.20186	1.14149
3246	M9ND37	M9ND37	0.328401	0.346602
3247	M9ND37	M9ND37	-0.47383	-0.37928
3248	M9ND37	M9ND37	-0.548387	-0.540797
3250	M9ND37	M9ND37	-0.49032	0.0907885
3251	M9ND37	M9ND37	-0.293334	-0.401889
3252	M9ND37	M9ND37	0.269149	0.23342
3253	M9ND37	M9ND37	0.102478	0.0929244
3254	M9NDA1	M9NDA1	-0.854809	-0.825303
3255	M9NDA1	M9NDA1	-0.0619759	-0.0586181
3261	M9NDA1	M9NDA1	-0.129191	-0.0850101
3267	M9NDA1	M9NDA1	1.37381	1.39505
3268	M9NDA1	M9NDA1	0.709896	0.658705
3272	M9NDC3	M9NDC3	0.166217	0.155672
3273	M9NDL7	M9NDL7	-0.283968	-0.256226
3275	M9NDL7	M9NDL7	0.614025	0.610652
3288	M9NDL7	M9NDL7	-0.33289	-0.308491
3290	M9NDL7	M9NDL7	-2.54403	-2.51279
3292	Q8IQA6	Q8IQA6	-0.591833	-0.57514
3295	Q8IQA6	Q8IQA6	0.0771509	0.134525
3296	Q8IQA6	Q8IQA6	-0.169987	-0.162952
3299	M9NDP7	M9NDP7	0.396105	0.571186
3305	M9NDR2	M9NDR2	-0.367842	-0.426005
3306	M9NDR2	M9NDR2	-0.163576	-0.216168
3308	M9NDR2	M9NDR2	-0.255557	-0.248105
3309	M9NDR2	M9NDR2	-0.217066	-0.225473
3311	M9NDR2	M9NDR2	-0.693321	-0.762732
3314	M9NDX3	M9NDX3	0.0105677	0.0255852
3315	M9NE01;M9NEL1	M9NEL1	-0.0477594	-0.0342744
3318	M9NE25	M9NE25	0.474604	0.725823
3331	M9NE89	M9NE89	0.128565	0.23152
3337	M9NE89	M9NE89	-0.432941	-0.400884
3339	M9NE89	M9NE89	-0.169087	-0.202004
3341	M9NEA7;M9NG31	M9NEA7	-0.826915	-0.613378
3342	M9NEA7	M9NEA7	0.273135	0.1414
3349	M9NED4;M9NF18	M9NF18	0.93862	0.947769
3350	M9NED8	M9NED8	0.243898	0.315568
3353	M9NED8	M9NED8	-0.236435	-0.227063
3354	M9NED8	M9NED8	-0.456986	-0.400366
3355	Q9XYX1	Q9XYX1	-0.376347	-0.395567
3358	M9NEL1	M9NEL1	0.396991	0.411944
3359	M9NEL1	M9NEL1	0.44426	0.364665
3360	M9NEL1	M9NEL1	0.517173	0.527871
3361	M9NEQ9	M9NEQ9	-0.133149	-0.114285
3362	M9NEV0	M9NEV0	-0.0350365	-0.0566703
3367	M9NEV0	M9NEV0	0.158944	0.172004
3371	M9NEV0	M9NEV0	-0.0451274	-0.0475217
3374	M9NEV0	M9NEV0	-0.102175	-0.0949384
3380	M9NEW2	M9NEW2	-0.0576235	-0.0446142
3381	M9NEW2	M9NEW2	-0.0576235	-0.0446142
3382	M9NEW2	M9NEW2	0.142039	-0.0458319
3383	M9NEW2	M9NEW2	0.142039	-0.0458319
3385	M9NF18	M9NF18	-0.106375	-0.123046
3389	M9NF33	M9NF33	-0.106614	-0.0987579
3393	M9NF67	M9NF67	-0.335099	-0.364298
3398	M9NF67	M9NF67	-0.830618	-0.821404
3399	M9NF67	M9NF67	-0.830618	-0.821404
3400	M9NF67	M9NF67	-0.189356	-0.230136
3401	M9NF67	M9NF67	-0.189356	-0.230136
3407	M9NFA7	M9NFA7	-0.275018	-0.305412
3412	M9NFQ5	M9NFQ5	0.257285	0.373972
3414	M9NFQ5	M9NFQ5	0.261574	0.377927
3416	M9NFQ5	M9NFQ5	-0.991623	-0.960295
3417	M9NFQ5	M9NFQ5	-0.848283	-0.856828
3420	M9NFQ5	M9NFQ5	-0.92728	-0.96528
3421	M9NFQ5	M9NFQ5	-0.0813332	-0.256052
3430	M9NFQ5	M9NFQ5	-0.364427	-0.297792
3431	M9NFQ5	M9NFQ5	-0.386183	-0.318559
3432	M9NFQ5	M9NFQ5	-0.163138	-0.114892
3433	M9NFQ5	M9NFQ5	-0.163138	-0.114892
3435	M9NFQ5	M9NFQ5	0.202175	0.120271
3438	M9NFQ5	M9NFQ5	-1.00795	-0.866229
3444	M9NFV3	M9NFV3	0.221005	0.0324489
3450	M9NFV3	M9NFV3	0.116155	0.199121
3453	M9NFV3	M9NFV3	-0.544214	-0.623913
3457	M9NG39	M9NG39	0.349798	0.306295
3458	M9NG39	M9NG39	-0.390502	-0.378137
3459	M9NG39	M9NG39	-0.147337	-0.13414
3460	M9NG39	M9NG39	-0.198267	-0.175697
3461	M9NG39	M9NG39	0.0728269	0.08141
3469	Q9W2Y5	Q9W2Y5	0.148125	0.179204
3470	Q9W2Y5	Q9W2Y5	-0.647299	-0.636969
3474	M9PAY6	M9PAY6	0.615933	0.61817
3479	Q9VQ83	Q9VQ83	-0.0425831	-0.0748649
3481	M9PC65	M9PC65	-0.0263083	-0.0206851
3485	O96607	O96607	-0.0462564	0.0702208
3489	M9PB57	M9PB57	0.0696097	0.186207
3490	M9PB57	M9PB57	-0.337142	-0.335557
3494	M9PB60	M9PB60	0.298529	0.294304
3497	M9PB68	M9PB68	-0.01304	-0.0319999
3498	M9PB68	M9PB68	-0.0384744	-0.0648234
3501	M9PB68	M9PB68	-0.00493012	-0.0326169
3505	M9PB68	M9PB68	0.831205	0.49233
3507	M9PB68	M9PB68	0.0953654	0.105922
3512	M9PB84	M9PB84	0.681716	0.734871
3513	M9PB85	M9PB85	0.0590114	0.44112
3514	M9PB85	M9PB85	-0.0898409	0.0439653
3515	M9PB85	M9PB85	-0.310199	-0.319079
3521	M9PB90	M9PB90	0.0129534	-0.012055
3524	M9PBB5	M9PBB5	-0.174735	-0.204855
3534	Q9VIV0	Q9VIV0	-0.0291114	-0.0355755
3539	Q9VIV0	Q9VIV0	-0.300456	-0.376674
3540	M9PBH9	M9PBH9	-0.477174	-0.450928
3542	M9PDQ0	M9PDQ0	-0.0479174	-0.110642
3548	M9PBK5	M9PBK5	-0.421311	-0.359183
3549	M9PBK5	M9PBK5	0.237701	0.27701
3553	M9PBL3	M9PBL3	-0.373101	-0.357838
3554	M9PBL3	M9PBL3	0.124676	0.0681496
3559	M9PBL3	M9PBL3	-0.321231	-0.296865
3560	M9PBL3	M9PBL3	0.108791	0.200649
3565	M9PE73	M9PE73	0.24264	0.241572
3566	M9PE73	M9PE73	0.258582	0.273723
3573	Q8I934	Q8I934	0.134574	0.155946
3574	Q8I934	Q8I934	-0.0985884	-0.077882
3580	M9PBW9	M9PBW9	-0.839931	-0.826975
3605	M9PC73	M9PC73	-0.288336	-0.248152
3613	M9PCC1	M9PCC1	0.241156	0.150271
3632	M9PCN6	M9PCN6	-0.392163	-0.380082
3633	M9PCN6	M9PCN6	-0.0746998	-0.0258603
3634	M9PCN6	M9PCN6	0.227644	0.243468
3638	M9PCQ8	M9PCQ8	0.545365	0.590103
3640	M9PCQ8	M9PCQ8	0.184473	0.20777
3642	M9PCV9	M9PCV9	-0.222928	-0.21106
3643	M9PCX3;X2J5P0	M9PCX3	0.131925	0.092783
3645	M9PCX3	M9PCX3	0.0409672	0.0456463
3647	M9PCX3	M9PCX3	-0.0799984	0.0389686
3663	M9PD16	M9PD16	0.0634447	0.0818412
3664	M9PD16	M9PD16	-0.0946874	-0.0310734
3666	M9PD16	M9PD16	-0.0825694	-0.0374062
3667	M9PD16	M9PD16	0.0513218	0.10802
3669	M9PD16	M9PD16	-0.0890691	-0.211083
3671	M9PD16	M9PD16	-0.757151	-0.816406
3672	M9PD16	M9PD16	-0.757151	-0.816406
3686	M9PD27	M9PD27	0.100869	0.0164011
3687	M9PD27	M9PD27	0.119509	0.235366
3688	Q0E8R8	Q0E8R8	-0.016616	0.045765
3689	Q0E8R8	Q0E8R8	-0.631654	-0.515396
3690	Q0E8R8	Q0E8R8	-0.47117	-0.406955
3698	M9PDG3	M9PDG3	-0.163043	-0.206689
3700	M9PDG3	M9PDG3	-0.185678	-0.194309
3704	M9PD75	M9PD75	-0.211238	-0.236237
3708	M9PIH3	M9PIH3	0.174742	0.261383
3709	M9PIH3	M9PIH3	0.282255	0.228801
3713	M9PIH3	M9PIH3	0.132615	0.139381
3715	M9PD95	M9PD95	0.661277	0.817103
3716	M9PD95	M9PD95	0.227782	0.241587
3717	M9PD95	M9PD95	0.314334	0.334909
3723	Q9VIV2	Q9VIV2	-0.053263	-0.040083
3736	Q8INW9	Q8INW9	-0.0544077	-0.0164289
3738	M9PDR2	M9PDR2	0.0543526	-0.156996
3741	Q8IRG9	Q8IRG9	-0.260763	-0.275564
3742	Q8IRG9	Q8IRG9	-0.241823	-0.190556
3745	Q8SX64	Q8SX64	-0.644861	-0.653222
3753	Q7KM04	Q7KM04	-0.378529	-0.396447
3755	Q7KM04	Q7KM04	0.496637	0.551823
3759	X2JJV1	X2JJV1	0.407209	0.485968
3762	Q7K3K5	Q7K3K5	-0.226281	-0.200235
3763	M9PEG8	M9PEG8	-0.10052	-0.0707453
3765	M9PEG8	M9PEG8	0.103692	0.135637
3766	M9PEG8	M9PEG8	-0.123352	-0.151309
3767	M9PEJ1	M9PEJ1	0.0546249	0.0719755
3768	M9PEJ1	M9PEJ1	0.156408	0.217605
3769	M9PEJ1	M9PEJ1	0.287543	0.326983
3770	M9PEJ1	M9PEJ1	-0.0575472	-0.0558585
3773	Q7KUD6	Q7KUD6	-0.0503337	-0.0651493
3774	Q7KUD6	Q7KUD6	-0.0783014	-0.0771853
3776	Q7KUD6	Q7KUD6	0.00546631	0.085006
3777	Q7KUD6	Q7KUD6	0.0280336	-0.0525488
3778	Q7KUD6	Q7KUD6	0.0651414	-0.0320021
3783	M9PES6	M9PES6	-0.154374	-0.143108
3784	M9PES6	M9PES6	-0.390349	-0.440769
3785	M9PES6	M9PES6	-0.21484	-0.236102
3786	M9PES8	M9PES8	0.23158	0.284635
3787	M9PEU5	M9PEU5	-0.104283	-0.121904
3788	M9PEU5	M9PEU5	0.143649	0.176504
3789	M9PEU5	M9PEU5	-0.238465	-0.259721
3796	M9PF14;Q9VTZ0	M9PF14	-1.11109	-1.24292
3805	M9PF24	M9PF24	0.109236	0.0770038
3806	M9PF24	M9PF24	0.553746	0.550625
3808	M9PF24	M9PF24	-0.259221	-0.225311
3812	M9PF85	M9PF85	0.318138	0.360418
3815	M9PFF0	M9PFF0	1.29035	1.27148
3816	M9PFF0	M9PFF0	-0.353801	-0.324311
3817	M9PFF0	M9PFF0	0.572138	0.578794
3819	M9PFM5	M9PFM5	-0.121846	-0.176197
3820	M9PFM5	M9PFM5	-0.0375102	-0.0421875
3821	M9PFM5	M9PFM5	0.235292	0.215577
3822	M9PFM5	M9PFM5	-0.254648	-0.206964
3827	M9PFS0	M9PFS0	-0.333534	-0.327115
3829	M9PFS8	M9PFS8	0.0537861	-0.0718271
3830	M9PFS8	M9PFS8	0.136784	0.14115
3838	M9PI89	M9PI89	-0.577954	-0.321566
3842	M9PFY1	M9PFY1	-0.341299	-0.318833
3843	M9PFY1	M9PFY1	-0.34929	-0.366513
3849	M9PFY2	M9PFY2	0.298268	0.300178
3850	M9PFY2	M9PFY2	-0.0634757	-0.0857132
3851	M9PFY2	M9PFY2	-0.270688	-0.25874
3855	M9PFZ1;Q7KTV5	Q7KTV5	1.56502	1.57806
3856	M9PFZ1;Q7KTV5	Q7KTV5	1.53192	1.46565
3857	M9PFZ1;Q7KTV5	Q7KTV5	0.934588	1.07213
3860	M9PFZ1;Q7KTV5	Q7KTV5	0.424066	0.41912
3862	M9PFZ1;Q7KTV5	Q7KTV5	1.09338	1.15315
3864	M9PFZ1;Q7KTV5	Q7KTV5	0.781805	0.656392
3865	M9PFZ1;Q7KTV5	Q7KTV5	1.1765	0.992687
3866	M9PFZ1;Q7KTV5	Q7KTV5	0.83763	0.642326
3867	M9PFZ1;Q7KTV5	Q7KTV5	-0.278762	-0.397952
3870	M9PFZ1;Q7KTV5	Q7KTV5	0.527538	0.578414
3871	M9PFZ1;Q7KTV5	Q7KTV5	0.514847	0.575536
3872	M9PFZ1;Q7KTV5	Q7KTV5	0.601475	0.578414
3876	M9PFZ1;Q7KTV5	Q7KTV5	0.794702	0.918057
3877	M9PFZ1;Q7KTV5	Q7KTV5	0.130086	0.222632
3880	M9PFZ1;Q7KTV5	Q7KTV5	0.218856	0.170069
3883	M9PFZ1;Q7KTV5	Q7KTV5	-0.200731	-0.186938
3889	M9PFZ1;Q7KTV5	Q7KTV5	0.165037	0.248924
3904	M9PFZ1;Q7KTV5	Q7KTV5	0.909828	0.793188
3905	M9PFZ1;Q7KTV5	Q7KTV5	1.01024	0.962639
3906	M9PFZ1;Q7KTV5	Q7KTV5	1.71728	1.58798
3907	M9PFZ1;Q7KTV5	Q7KTV5	0.401084	0.197477
3908	M9PFZ1;Q7KTV5	Q7KTV5	0.581469	0.381607
3909	M9PFZ1;Q7KTV5	Q7KTV5	0.819399	0.638494
3911	M9PFZ1	M9PFZ1	-0.192548	-0.149293
3917	M9PFZ1	M9PFZ1	0.449784	0.437235
3919	M9PID3	M9PID3	0.129004	0.108692
3920	M9PG22	M9PG22	-0.417372	-0.586157
3935	M9PG50	M9PG50	0.237713	0.261842
3942	M9PG50	M9PG50	0.817828	0.705784
3951	M9PG50	M9PG50	-0.00611576	0.00462951
3952	M9PG76	M9PG76	0.358923	0.354383
3953	M9PG76	M9PG76	-0.0514541	-0.0491294
3959	M9PGG7	M9PGG7	0.094777	0.0633935
3960	M9PGG8	M9PGG8	0.166006	-0.0393038
3963	Q95RU8	Q95RU8	0.4729	0.53155
3967	Q95RU8	Q95RU8	-0.115405	-0.227035
3976	Q7YU15	Q7YU15	-0.28234	-0.29287
3983	M9PGQ6	M9PGQ6	0.0347262	0.0371026
3984	M9PGQ6	M9PGQ6	0.0423122	0.050726
3987	M9PGW8	M9PGW8	-0.740219	-0.692332
3988	M9PGW8	M9PGW8	1.11566	0.972157
3989	M9PGW8	M9PGW8	0.590141	0.430739
4007	Q9VYK0	Q9VYK0	-0.500936	-0.491766
4008	Q9VYK0	Q9VYK0	-0.15368	-0.155034
4010	Q9VYK0	Q9VYK0	-0.0990701	-0.0952
4022	X2JEY9	X2JEY9	0.287481	0.343313
4035	X2JEY9	X2JEY9	-0.2173	-0.223912
4038	M9PJQ3	M9PJQ3	-0.296025	-0.233209
4045	M9PHK2	M9PHK2	-0.0369429	0.0549977
4048	M9PHL0	M9PHL0	-0.168008	-0.186557
4049	M9PHL0	M9PHL0	0.233612	0.239382
4051	M9PHL0	M9PHL0	0.811937	0.780674
4063	M9PHL0	M9PHL0	-0.0271553	0.0506925
4067	M9PHL0	M9PHL0	-0.0141336	0.0435993
4068	M9PHL0	M9PHL0	-0.34606	-0.217804
4072	M9PHN1	M9PHN1	0.771434	0.297167
4079	M9PI17	M9PI17	0.0475645	-0.00247262
4080	M9PI17	M9PI17	-0.1625	-0.195092
4081	Q9VTY8	Q9VTY8	0.0142119	0.0386765
4082	Q9VTY8	Q9VTY8	-0.366462	-0.323175
4086	X2JD11	X2JD11	0.133516	0.0417903
4093	Q9VVW6	Q9VVW6	-0.0353311	-0.0615964
4095	Q9VVW6	Q9VVW6	0.189154	0.113186
4103	M9PIC3	M9PIC3	0.399593	0.463951
4104	M9PIC3	M9PIC3	0.262432	0.229327
4105	M9PIC3	M9PIC3	0.215958	0.226077
4111	M9PIC3	M9PIC3	0.556926	0.52639
4112	Q9VPB2	Q9VPB2	-0.401647	-0.528021
4113	Q9VPB2	Q9VPB2	0.209586	0.203434
4115	Q9VPB2	Q9VPB2	0.178218	0.112725
4128	M9PJC7	M9PJC7	-0.112582	-0.0725616
4131	M9PJC7	M9PJC7	-0.356639	-0.338989
4134	M9PJC7	M9PJC7	-0.054157	-0.00182603
4135	M9PJN8	M9PJN8	0.0636729	0.0260975
4143	M9W963	M9W963	-0.18017	-0.0524131
4145	M9W963	M9W963	0.298018	0.283357
4147	M9W963	M9W963	0.0227956	0.0662876
4148	N0D8I3	N0D8I3	-0.0338076	-0.0891972
4149	N0D8I3	N0D8I3	0.0310032	0.0507413
4150	N0D8I3	N0D8I3	-0.56145	-0.550907
4151	N0D8I3	N0D8I3	-0.255975	-0.25589
4152	N0D8I3	N0D8I3	-0.34956	-0.397288
4153	N0D8I3	N0D8I3	0.0563026	0.0835444
4154	N0D8I3	N0D8I3	-0.212753	-0.193333
4156	N0D8I3	N0D8I3	-0.207982	-0.263286
4166	X2JG23	X2JG23	-0.227793	-0.194899
4167	O02002	O02002	-0.54798	-0.613934
4171	O02193	O02193	-1.43094	-1.45605
4173	O02193	O02193	1.05542	0.959869
4176	O02649;Q9VMN5	O02649	0.0382514	0.0506489
4178	O16043	O16043	-0.410176	-0.376664
4179	O16043	O16043	0.165354	0.181466
4181	O16043	O16043	0.326868	0.340875
4182	O16043	O16043	-0.178079	-0.191593
4183	O16043	O16043	-0.191622	-0.17523
4184	O16043	O16043	-0.176894	-0.196004
4185	O16043	O16043	0.129016	0.14533
4187	O16043	O16043	0.47425	0.519179
4188	O16043	O16043	-0.256931	-0.304449
4190	O16102	O16102	-0.010513	-0.0303673
4191	O16797	O16797	0.252077	0.171836
4196	O16810	O16810	0.222904	0.236999
4198	O16810	O16810	0.116131	0.131302
4199	O16810	O16810	0.24755	0.196709
4203	O17468	O17468	-0.503268	-0.550087
4210	O18332	O18332	0.69348	0.334993
4212	X2J5T3	X2J5T3	1.46583	1.48657
4214	O18353	O18353	-0.0499861	0.0126018
4215	O18353	O18353	-0.0556355	-0.0912029
4216	O18353	O18353	-0.0697914	0.00117309
4231	O46043	O46043	0.89898	0.930336
4232	O46043	O46043	0.277497	0.329078
4234	O46043	O46043	0.0587549	0.196229
4235	O46043	O46043	-0.197404	-0.0375284
4237	Q7KW02	Q7KW02	-0.210136	-0.219925
4238	Q7KW02	Q7KW02	0.204632	0.204677
4239	Q7KW02	Q7KW02	0.0676112	0.0106918
4240	Q7KW02	Q7KW02	-0.262909	-0.258776
4249	Q7KW02	Q7KW02	0.917985	0.885396
4252	Q7KW02	Q7KW02	-0.168628	-0.152029
4253	Q7KW02	Q7KW02	-0.385947	-0.307356
4255	O46067	O46067	-0.0949125	-0.076428
4264	O46307	O46307	-0.13178	-0.123929
4269	O61305	O61305	-0.000588371	-0.00180098
4272	O61305	O61305	-0.415169	-0.344055
4274	O61345	O61345	-0.465564	-0.417223
4275	O61443	O61443	-0.183476	-0.106967
4277	O61604	O61604	-0.386814	-0.305154
4278	O61613	O61613	0.183833	0.114869
4286	O62602	O62602	-0.625635	-0.656777
4289	Q541C9	Q541C9	-0.0733363	-0.0929032
4290	Q541C9	Q541C9	0.151653	0.19905
4293	O76857	O76857	-0.121019	-0.123607
4301	Q2PE37	Q2PE37	0.258623	0.204156
4303	O76906	O76906	-0.0510896	-0.0883695
4304	O76906	O76906	0.493158	0.45028
4306	O76906	O76906	0.425492	0.147074
4309	Q7YZA5	Q7YZA5	-0.303401	-0.282472
4316	O77430	O77430	0.236802	0.307539
4319	O96838	O96838	1.26819	1.46636
4320	O96838	O96838	0.094433	0.121745
4325	O97132	O97132	0.427574	0.426413
4327	O97132	O97132	0.729422	0.722134
4328	O97132	O97132	-0.256882	-0.252603
4331	X2J516	X2J516	0.382254	0.389859
4332	Q4ABE3	Q4ABE3	-0.241221	-0.186122
4333	Q4ABE3	Q4ABE3	-0.294854	-0.219826
4334	Q4ABE3	Q4ABE3	-0.011563	0.0540581
4335	Q4ABE3	Q4ABE3	-0.268493	-0.197541
4344	X2JGG6	X2JGG6	1.03767	0.695342
4345	X2JC82	X2JC82	1.28456	1.25799
4346	X2JC82	X2JC82	-0.156599	-0.182105
4349	X2JD55	X2JD55	0.154164	0.093767
4350	X2JD55	X2JD55	0.276777	0.260032
4351	X2JD55	X2JD55	0.377056	0.338415
4352	X2JD55	X2JD55	-0.257035	-0.272637
4355	X2JD55	X2JD55	-0.0465991	0.0829446
4356	X2JD55	X2JD55	-0.81774	-0.693458
4357	X2JD55	X2JD55	-0.0825368	-0.0245791
4358	X2JD55	X2JD55	-0.154585	-0.141794
4360	X2JD55	X2JD55	-1.03949	-1.09374
4364	X2JD55	X2JD55	-0.272837	-0.306459
4365	X2JD55	X2JD55	-0.452728	-0.526655
4369	X2JB25	X2JB25	0.535522	0.245697
4384	X2JB25	X2JB25	-0.145679	-0.123098
4401	Q53YG3	Q53YG3	0.238105	0.674679
4402	Q53YG3	Q53YG3	-1.15549	-1.13337
4403	Q53YG3	Q53YG3	-1.13396	-0.949942
4405	P05084	P05084	-0.0744376	-0.0480769
4408	P05084	P05084	-0.392485	-0.407226
4412	P05205	P05205	-0.0253095	-0.0899585
4414	P05205	P05205	0.232569	0.289076
4415	P05389	P05389	0.210701	0.28356
4416	P05389	P05389	0.064905	0.135325
4424	P06605	P06605	0.314747	0.282255
4425	P06606	P06606	0.332123	0.273094
4426	P06606	P06606	0.0789304	0.0849125
4427	P06606	P06606	-0.054107	-0.0499024
4428	P06606	P06606	-0.284634	-0.32914
4429	P06606	P06606	-0.197323	-0.165023
4431	X2JEX8	X2JEX8	0.128915	0.282828
4436	X2JEX8	X2JEX8	-0.163457	-0.0977628
4437	X2JEX8	X2JEX8	-0.0460142	-0.0215005
4438	X2JEX8	X2JEX8	0.0765273	0.108702
4439	X2JEX8	X2JEX8	-0.0708697	-0.00845016
4443	P07664	P07664	0.0355825	0.126795
4446	P09081	P09081	-0.138583	-0.13424
4447	P09081	P09081	0.211691	0.213764
4449	P09180	P09180	0.253106	0.201559
4459	P11346	P11346	-1.70839	-1.83668
4460	P11346	P11346	-1.70839	-1.83668
4463	P11455	P11455	0.152022	0.150002
4464	P11455	P11455	-0.19888	-0.203832
4465	P11455	P11455	-0.843998	-0.823123
4466	P13060	P13060	1.03291	0.759033
4469	P13060	P13060	0.238141	0.21425
4470	P13468	P13468	0.239407	0.305615
4471	P13496	P13496	0.84462	1.08893
4472	P13496	P13496	0.812198	1.03816
4476	P13496	P13496	0.0422048	0.058103
4477	P13496	P13496	-0.35412	-0.320824
4478	P13496	P13496	-0.123352	-0.0870173
4481	P13496	P13496	-0.572187	-0.54825
4483	P14199	P14199	-0.462067	-0.453672
4488	P15007	P15007	0.811089	0.709268
4489	P15348	P15348	0.00781177	0.0281396
4491	P15348	P15348	0.32102	0.213845
4492	P15348	P15348	-0.00743631	0.155714
4493	P15348	P15348	0.321904	0.344494
4494	P15348	P15348	0.338964	0.333569
4495	P15348	P15348	0.0809974	0.0859452
4497	P15348	P15348	0.39633	0.366625
4498	P15357	P15357	0.347824	0.398933
4499	P17210	P17210	-0.0124494	0.526936
4501	P17210	P17210	-0.273457	-0.277435
4502	P17210	P17210	0.162534	0.145421
4520	P20240	P20240	0.0137986	0.00660086
4521	P20240	P20240	-0.0408146	-0.0400006
4523	P20240	P20240	-0.406603	-0.32142
4524	P20240	P20240	-0.638759	-0.58332
4532	P20439	P20439	0.129957	0.131927
4533	P20439	P20439	-0.111129	-0.199414
4536	P20439	P20439	-0.113876	-0.0494111
4538	P21187	P21187	0.142214	0.123776
4550	Q4H2F8	Q4H2F8	-0.388144	-0.395163
4554	Q4H2F8	Q4H2F8	-0.119754	-0.21163
4557	P23128	P23128	-0.174503	-0.173281
4559	P23128	P23128	-0.240902	-0.288814
4560	P23128	P23128	-0.409857	-0.461011
4561	P23128	P23128	-0.983221	-0.984394
4563	Q8IMF5	Q8IMF5	0.3324	0.379539
4564	Q8IMF5	Q8IMF5	-0.0369992	-0.0257995
4566	Q8IMF5	Q8IMF5	0.617055	0.569194
4568	P25007	P25007	-0.137474	-0.115527
4570	P25007	P25007	0.230661	0.245255
4572	P25028	P25028	0.177381	0.194883
4573	P25028	P25028	0.177381	0.194883
4578	P25171	P25171	0.293752	0.270011
4581	P25171	P25171	-0.163414	-0.14603
4582	P25455	P25455	0.0999624	0.14806
4583	P25823	P25823	0.730229	0.771484
4586	P25823	P25823	0.145998	0.0926947
4588	P25991	P25991	0.059188	0.0530274
4589	P25991	P25991	0.00553956	-0.0305059
4590	P25991	P25991	0.047401	0.0645809
4592	P26019	P26019	-0.170849	-0.165067
4600	P28668	P28668	0.0960663	-0.00477669
4601	P28668	P28668	0.46457	0.137894
4602	P28668	P28668	0.07779	0.0170503
4603	P28668	P28668	-0.253775	-0.376209
4604	P28668	P28668	0.243292	0.227256
4605	P29327	P29327	0.575429	0.542239
4606	P29327	P29327	1.01477	0.916324
4607	P29327	P29327	0.416378	0.418643
4609	P29327	P29327	-0.0302563	0.00729766
4611	P29327	P29327	0.551611	0.515062
4612	P29327	P29327	0.623462	0.555732
4613	Q53YH3	Q53YH3	0.191772	0.289218
4614	P29746	P29746	0.250854	0.251209
4618	P29746	P29746	0.699891	0.660389
4628	P34739	P34739	0.121207	0.127372
4630	P34739	P34739	0.212684	0.188903
4631	P34739	P34739	0.04711	0.0197663
4632	P34739	P34739	-0.972015	-0.920583
4633	P34739	P34739	-0.128322	-0.08962
4635	P34739	P34739	0.319199	0.229228
4636	P34739	P34739	0.179099	0.175721
4647	P34739	P34739	-0.0024338	-0.0897857
4648	P34739	P34739	-0.163682	-0.0921298
4656	P35600	P35600	-0.287517	-0.285696
4657	P35600	P35600	-0.0126489	0.0475995
4658	P35600	P35600	1.26398	1.35468
4659	P35600	P35600	0.701703	0.813476
4660	P35600	P35600	-0.0246095	-0.0575408
4661	P35600	P35600	0.177305	0.163231
4662	P35600	P35600	0.296853	0.261949
4663	P35600	P35600	0.360653	0.287386
4664	P35600	P35600	0.355592	0.312937
4666	P35600	P35600	0.142992	0.123514
4668	P35600	P35600	-0.174311	-0.158219
4670	P35600	P35600	0.685444	0.779522
4671	P35600	P35600	-0.0177423	0.0410371
4672	P35600	P35600	0.01168	-0.0265804
4677	P35600	P35600	-1.10665	-0.989914
4678	P35600	P35600	-0.270094	-0.244244
4679	P35600	P35600	-0.336191	-0.306021
4685	P39768	P39768	-0.519162	-0.420965
4697	P40796	P40796	-0.432661	-0.433757
4698	P40797	P40797	0.522103	0.807632
4700	P40797	P40797	-0.5817	-0.567153
4702	P40797	P40797	0.53335	0.625301
4703	P41093	P41093	0.578111	0.56817
4705	P41094	P41094	0.173792	0.159149
4706	X2JFR6	X2JFR6	-0.119063	-0.116834
4707	X2JFR6	X2JFR6	0.479223	0.427872
4708	P41375	P41375	-0.290451	-0.340271
4711	P42207	P42207	-1.39629	-1.37597
4712	P42283	P42283	-0.483274	-0.43441
4713	P42283	P42283	-1.37147	-1.24883
4714	P42283	P42283	-0.692769	-0.54597
4726	P45437	P45437	0.141704	0.105263
4727	P45594	P45594	-0.730193	-0.699302
4728	X2JCS6	X2JCS6	-0.0589927	0.0702677
4733	P46863	P46863	0.109487	0.157674
4737	P48591	P48591	-0.834396	-0.858775
4738	P48591	P48591	0.321638	0.350946
4739	P48592	P48592	-0.457604	-0.381838
4741	P48592	P48592	0.360448	0.365817
4742	P48592	P48592	-0.757484	-0.718772
4751	P49735	P49735	-1.08755	-0.763105
4755	P49846	P49846	0.0267354	-0.0186313
4756	P49906	P49906	-0.142889	-0.0980149
4757	P49906	P49906	0.160264	0.209778
4758	P49906	P49906	-0.214486	-0.199465
4759	P49963	P49963	-0.203175	-0.174962
4765	P52295	P52295	-0.179369	-0.194598
4769	P52295	P52295	0.0672772	0.0700803
4773	P52654	P52654	0.0315849	0.0391484
4776	P54352	P54352	-0.0853005	-0.122266
4777	P54353	P54353	0.393766	0.527672
4779	P54359	P54359	0.288524	0.194422
4780	P54397	P54397	0.281617	0.257696
4781	P54397	P54397	0.114412	0.108746
4782	P54397	P54397	0.552249	0.514486
4785	P55828	P55828	0.131568	0.118688
4786	P55828	P55828	0.128235	0.0998339
4793	P55841	P55841	-0.0383541	-0.0842275
4794	X2JC55	X2JC55	-0.658446	-0.181269
4795	X2JC55	X2JC55	0.834817	0.851964
4796	X2JC55	X2JC55	0.160369	0.364835
4799	P61851	P61851	0.321394	0.272203
4806	P81900	P81900	0.0516908	-0.0170246
4809	P83094	P83094	-0.325926	-0.296458
4812	P83094;Q7KUZ1	P83094	-1.2473	-1.35596
4815	P83102	P83102	-0.291996	-0.321216
4816	P83103	P83103	-0.545805	-0.516356
4817	P83292	P83292	-0.401716	-0.344172
4820	P91682	P91682	-0.986518	-0.970346
4822	P91682	P91682	-0.192881	-0.194466
4823	P91682	P91682	-0.156391	-0.0613228
4824	P91682	P91682	-0.452651	-0.369653
4829	P91927	P91927	-0.513304	-0.517391
4830	P91927	P91927	0.00263549	-0.116058
4832	P92177	P92177	0.53961	0.49063
4834	P92177	P92177	1.24287	1.26116
4837	P98159	P98159	0.260378	0.280412
4838	P98159	P98159	-0.102736	-0.141296
4839	P98159	P98159	0.00384527	0.070398
4840	P98159	P98159	0.364429	0.368164
4842	P98159	P98159	-0.420405	-0.38945
4843	P98159	P98159	-0.421397	-0.385763
4845	P98163	P98163	0.0927115	0.134408
4849	Q01637	Q01637	0.322355	0.336289
4854	Q02308	Q02308	0.380416	0.293543
4864	Q04652	Q04652	0.0150645	-0.0598263
4865	Q04652	Q04652	-0.528269	-0.705937
4866	Q05344	Q05344	0.425365	0.358065
4867	Q05344	Q05344	0.112628	0.17102
4871	Q05344	Q05344	0.137521	0.13305
4873	Q05344	Q05344	0.167276	0.227735
4875	Q05913	Q05913	1.24938	1.27997
4880	Q05913	Q05913	-0.230966	-0.167213
4882	Q05913	Q05913	0.185858	0.516206
4884	Q05913	Q05913	-0.307899	-0.217272
4893	Q0E8E5	Q0E8E5	0.0216728	0.0498011
4897	Q9VSY2	Q9VSY2	0.0173072	-0.00977645
4898	Q0E8J0	Q0E8J0	-0.284582	-0.359001
4902	Q0E8J0	Q0E8J0	-0.0425154	-0.0700795
4903	Q0E8J0	Q0E8J0	-0.0347715	-0.107204
4905	Q0E8J0	Q0E8J0	0.211269	0.0891912
4909	Q0E8J0	Q0E8J0	-0.326432	-0.236279
4911	Q0E8J0	Q0E8J0	-0.200317	-0.186841
4912	Q0E8J0	Q0E8J0	-0.340404	-0.312187
4913	Q0E8J0	Q0E8J0	-0.375476	-0.308295
4917	X2J8G3	X2J8G3	0.130974	0.155781
4923	Q0E8X6	Q0E8X6	-0.774374	-0.722605
4924	Q0E8X6	Q0E8X6	-0.537363	-0.535043
4926	Q0E8X6	Q0E8X6	0.317932	0.289777
4927	Q0E8X6	Q0E8X6	0.275537	0.326073
4928	Q0E8X7	Q0E8X7	0.165216	0.208115
4932	Q0E9B5	Q0E9B5	-0.0767517	0.00660849
4933	Q0E9B5	Q0E9B5	0.0682991	0.0302473
4934	Q0E9B5	Q0E9B5	-0.0391791	-0.0738497
4935	Q0E9B5	Q0E9B5	0.297627	0.249293
4936	Q0E9B6	Q0E9B6	0.456934	0.3764
4938	Q9VX75	Q9VX75	-0.186857	-0.130228
4949	Q0KHR4	Q0KHR4	0.0994275	0.0490855
4952	Q0KHR5	Q0KHR5	0.0418466	0.0695868
4960	Q0KHZ9	Q0KHZ9	-0.210696	-0.446095
4961	Q0KHZ9	Q0KHZ9	-2.45742	-2.64366
4963	Q0KHZ9	Q0KHZ9	-0.0676808	-0.107517
4964	Q0KHZ9	Q0KHZ9	-0.553157	-0.364259
4965	Q0KHZ9	Q0KHZ9	-0.0418837	0.0439777
4972	Q23972	Q23972	0.0263077	0.0394009
4977	Q23973	Q23973	0.0440699	0.0240662
4980	Q23976	Q23976	0.117021	0.183804
4981	Q23976	Q23976	0.186886	0.231767
4982	Q24044	Q24044	1.71575	1.63438
4983	Q24050	Q24050	0.187999	0.474494
4984	Q24050	Q24050	-0.22943	0.0229857
4991	Q53ZT0	Q53ZT0	0.158285	0.167696
4992	Q53ZT0	Q53ZT0	-0.10487	-0.139692
4995	Q24154	Q24154	0.339405	0.237893
4998	Q24168	Q24168	-0.00608832	0.029306
4999	Q24168	Q24168	-0.0496612	0.0127838
5000	Q24168	Q24168	0.0877379	0.112724
5001	Q24168	Q24168	0.209023	0.148761
5002	Q24168	Q24168	-0.0438987	0.0227634
5006	Q24185	Q24185	-0.0254836	-0.0310388
5007	X2JKU5	X2JKU5	0.0336501	0.0436778
5010	Q24276	Q24276	0.114317	0.0457077
5023	Q24368	Q24368	0.028407	0.0596309
5026	Q24368	Q24368	0.0363482	0.0836872
5029	Q24368	Q24368	0.46637	0.425495
5030	Q24371	Q24371	0.024468	0.0389174
5031	Q24371	Q24371	-0.492712	-0.418913
5034	Q24371	Q24371	0.550959	0.515904
5039	Q24472	Q24472	0.0144483	-0.0103505
5042	Q24478	Q24478	0.402442	0.435978
5043	Q24478	Q24478	0.337341	0.406872
5044	Q24478	Q24478	0.168632	0.183884
5045	Q24478	Q24478	0.0470131	0.0956645
5047	Q24478	Q24478	-0.24951	-0.197654
5048	Q24478	Q24478	0.168388	0.165864
5049	Q24478	Q24478	-0.221907	-0.270569
5050	Q24478	Q24478	-0.173532	-0.0987074
5051	Q24478	Q24478	-0.252816	-0.23262
5052	Q24478	Q24478	0.354163	0.348673
5053	Q24478	Q24478	0.108913	0.112162
5054	Q24478	Q24478	-0.0633726	-0.0552583
5058	Q24478	Q24478	-0.162064	-0.149369
5060	Q24478	Q24478	-0.367171	-0.32689
5061	Q24478	Q24478	-0.0909318	0.0010716
5062	Q24478	Q24478	0.326931	0.36186
5067	Q24492	Q24492	-0.167111	-0.240347
5073	Q24560	Q24560	0.149928	0.527253
5076	Q24574	Q24574	0.104561	-0.0909575
5077	Q24574	Q24574	-0.159433	-0.201449
5089	Q24574	Q24574	0.0129636	-0.0881681
5092	Q24574	Q24574	0.522015	0.330433
5094	Q24574	Q24574	0.0757364	0.046401
5095	Q24574	Q24574	-0.285127	-0.422011
5096	Q24574	Q24574	-0.285127	-0.422568
5097	Q24574	Q24574	-0.872447	-0.900221
5098	Q24574	Q24574	-0.363722	-0.38036
5099	Q24574	Q24574	0.0427682	0.0279315
5100	Q24574	Q24574	-0.144086	-0.169267
5104	Q24574	Q24574	-0.490704	-0.591547
5113	Q24595	Q24595	-0.819162	-0.848729
5114	Q24595	Q24595	-0.22632	-0.206596
5115	Q24595	Q24595	-0.340208	-0.191929
5116	Q24595	Q24595	-1.02114	-1.16522
5126	Q27333	Q27333	-0.387535	-0.462306
5130	Q29QE1;X2JC00	Q29QE1	-0.138924	-0.217371
5144	Q29QE1	Q29QE1	0.0375656	0.117957
5145	Q29QE1	Q29QE1	0.0375656	0.11926
5147	Q29QE1;X2JC00	Q29QE1	0.993712	1.10871
5148	Q29QE1;X2JC00	Q29QE1	-0.187282	-0.116026
5151	Q29QE1;X2JC00	Q29QE1	0.244139	0.351205
5152	Q29QE1;X2JC00	Q29QE1	0.315027	0.381847
5156	Q2PDP6	Q2PDP6	-0.209277	-0.404541
5161	Q2PE14	Q2PE14	0.308777	0.318418
5162	Q2PE14	Q2PE14	0.399624	0.38318
5164	Q2PE14	Q2PE14	-0.116261	-0.117821
5167	Q2PE14	Q2PE14	-0.432457	-0.41602
5168	Q32KD2	Q32KD2	-0.0846929	-0.0818674
5169	Q32KD2	Q32KD2	0.0967209	-0.105539
5171	Q32KD2	Q32KD2	-0.00233804	0.0270707
5184	Q494G8	Q494G8	0.486482	0.332966
5188	Q494K2	Q494K2	0.240292	0.267624
5189	Q494K2	Q494K2	0.266946	0.298391
5193	Q4QQ01	Q4QQ01	0.197095	0.143614
5194	Q4QQ01	Q4QQ01	0.287105	0.276886
5199	Q4U2Q5	Q4U2Q5	-0.284921	-0.250816
5200	Q4U2Q5	Q4U2Q5	-0.260117	-0.223791
5204	Q4U2Q5	Q4U2Q5	-0.301234	-0.345059
5207	Q4U2Q5	Q4U2Q5	-0.285301	0.162225
5210	Q4V3Z5	Q4V3Z5	0.242613	0.27575
5211	Q4V3Z5	Q4V3Z5	0.13468	0.142612
5219	Q540Z9	Q540Z9	0.105285	0.0719679
5220	Q540Z9	Q540Z9	0.506476	0.574133
5230	Q59E30	Q59E30	-1.28542	-1.10814
5233	Q59E33	Q59E33	0.0868528	-0.0337093
5234	Q59E33	Q59E33	-0.235191	-0.24763
5235	Q59E33	Q59E33	-0.288101	-0.317908
5239	Q5BI03	Q5BI03	-0.126397	-0.106929
5243	Q5BI31	Q5BI31	0.274953	0.333787
5244	Q5BI31	Q5BI31	0.274953	0.333787
5245	Q5BI31	Q5BI31	0.282502	0.355143
5247	Q5BI31	Q5BI31	0.423944	0.643662
5249	Q5BI31	Q5BI31	0.480095	0.589716
5251	Q5EAK6	Q5EAK6	-0.216958	-0.237764
5252	Q5LJZ2	Q5LJZ2	2.03717	1.98515
5257	Q5LJZ2	Q5LJZ2	0.240151	0.239213
5258	Q5LJZ2	Q5LJZ2	0.240151	0.239213
5259	Q5LJZ2	Q5LJZ2	-0.123661	-0.118954
5260	Q5LJZ2	Q5LJZ2	0.48535	0.468019
5265	Q5LJZ2	Q5LJZ2	-0.921578	-0.701775
5266	Q5LJZ2	Q5LJZ2	0.130012	0.106428
5267	Q5LJZ2	Q5LJZ2	0.183349	0.160628
5269	Q5U0V7	Q5U0V7	0.0586337	0.334015
5271	Q5U0V7	Q5U0V7	-0.218784	-0.187983
5280	Q5U0X8	Q5U0X8	-0.108644	-0.098151
5281	Q5U0X8	Q5U0X8	0.2888	0.253629
5282	Q5U0X8	Q5U0X8	1.1181	1.09476
5286	Q86NM7	Q86NM7	0.645558	0.739712
5287	Q86NM7	Q86NM7	0.517295	0.535544
5289	Q86NM7	Q86NM7	0.135162	0.130124
5291	Q7JQU9	Q7JQU9	-0.338575	-0.331547
5292	Q6IHY4	Q6IHY4	-0.218804	-0.248709
5298	Q6NQY9	Q6NQY9	-0.266504	-0.345477
5304	Q6NQZ5	Q6NQZ5	-0.439056	-0.435266
5306	Q6NQZ5	Q6NQZ5	-0.332891	-0.427955
5307	Q6NQZ5	Q6NQZ5	0.0274286	0.0106448
5315	Q7JQN4	Q7JQN4	-0.173959	-0.143517
5316	Q7JQN4	Q7JQN4	-0.173959	-0.143517
5317	Q7JQN4	Q7JQN4	-0.173959	-0.143517
5325	Q7JRE1	Q7JRE1	-0.213295	-0.147318
5327	Q7JRE4	Q7JRE4	-0.283785	-0.289659
5328	Q7JRE4	Q7JRE4	-0.319695	-0.348806
5342	Q7JRH5	Q7JRH5	0.256113	0.188943
5344	Q7JRH5	Q7JRH5	-0.0629666	0.0210818
5349	Q7JRH5	Q7JRH5	-0.425345	-0.379079
5350	Q7JRH5	Q7JRH5	-0.0835179	-0.0279743
5351	Q7JRH5	Q7JRH5	0.053519	0.0494035
5352	Q7JRH5	Q7JRH5	-0.150999	-0.157574
5362	Q7JVL3	Q7JVL3	0.234363	0.305734
5363	Q7JVP4	Q7JVP4	-0.183369	-0.198182
5364	Q7JVP4	Q7JVP4	-0.183369	-0.198182
5367	Q7JVP4	Q7JVP4	-0.0597621	-0.105284
5368	Q7JVP4	Q7JVP4	-0.065075	-0.113471
5374	Q7JVW5	Q7JVW5	0.674655	0.819763
5375	Q7JVY2	Q7JVY2	0.0554733	0.174611
5376	Q7JVY2	Q7JVY2	0.451062	0.611847
5379	Q7JVY2	Q7JVY2	0.0535198	0.110765
5380	Q7JVY2	Q7JVY2	-0.214639	-0.126606
5381	Q7JVY2	Q7JVY2	-0.0206057	-0.00672145
5383	Q7JVY2	Q7JVY2	0.0579491	0.1332
5384	Q7JVY2	Q7JVY2	0.0932774	0.209314
5386	Q7JW03	Q7JW03	0.91629	1.08939
5387	Q7JW03	Q7JW03	0.207155	0.327033
5390	Q7JW61	Q7JW61	-1.3244	-1.10577
5392	Q7JW61	Q7JW61	-0.0707353	-0.0985381
5394	Q7JW66	Q7JW66	0.0447871	0.0738497
5395	Q7JW66	Q7JW66	-0.175146	-0.148244
5396	Q7JWH5	Q7JWH5	0.219457	0.22726
5400	Q7JWP6	Q7JWP6	-0.0335743	-0.0333433
5401	Q7JWS8	Q7JWS8	0.101503	0.10573
5404	Q7JXF5	Q7JXF5	-0.15313	-0.151864
5408	Q7JXZ2	Q7JXZ2	-0.124079	-0.140126
5410	Q7JYV7	Q7JYV7	0.361177	0.229469
5412	Q7JZ25	Q7JZ25	-0.28037	-0.238197
5413	Q7JZ25	Q7JZ25	-0.288968	-0.310164
5415	Q7JZ37	Q7JZ37	-0.22306	-0.19452
5418	Q7JZN0	Q7JZN0	0.296669	0.475731
5419	Q7JZN0	Q7JZN0	0.0147155	0.0961503
5420	Q7JZN0	Q7JZN0	-0.225851	-0.15465
5421	Q7JZN0	Q7JZN0	0.121378	0.165362
5423	Q7JZN0	Q7JZN0	-0.211315	-0.167774
5424	Q7JZN0	Q7JZN0	-0.18903	-0.175544
5427	Q7K0D3	Q7K0D3	-0.476561	-0.388766
5429	Q7K0D8	Q7K0D8	0.132864	0.152346
5435	Q7K0E6	Q7K0E6	0.135912	0.117475
5441	Q7K0L8	Q7K0L8	-0.470914	-0.537691
5445	Q7K0L8	Q7K0L8	0.56703	0.455814
5446	Q7K0L8	Q7K0L8	0.145623	0.234368
5448	Q7K0S5	Q7K0S5	0.0195831	-0.00330944
5453	Q7K0X3	Q7K0X3	0.212454	0.149463
5454	Q7K0X3	Q7K0X3	-0.04852	-0.115913
5455	Q7K0X3	Q7K0X3	-0.0281075	-0.0890673
5466	Q7K130	Q7K130	0.547015	0.550471
5477	Q7K180	Q7K180	-0.419405	-0.297147
5479	Q7K180	Q7K180	-0.172253	-0.168781
5480	Q7K180	Q7K180	1.00414	0.823314
5481	Q7K180	Q7K180	0.368272	0.139785
5484	Q7K1Q6	Q7K1Q6	-0.170575	-0.16026
5485	Q7K1V0	Q7K1V0	0.339104	0.414188
5488	Q7K1V1	Q7K1V1	0.325342	0.39463
5489	Q7K1V1	Q7K1V1	-1.1549	-1.20234
5494	Q7K204	Q7K204	-0.0467254	-0.109856
5496	Q7K264	Q7K264	0.101413	0.281383
5497	Q7K264	Q7K264	-0.0756096	0.0766112
5503	Q7K2D2	Q7K2D2	0.0127769	0.0688753
5515	Q7K2N0	Q7K2N0	-0.165246	-0.286093
5516	Q7K2N0	Q7K2N0	-0.176909	-0.158506
5522	Q7K2N0	Q7K2N0	0.095089	0.0514471
5525	Q7K3D4	Q7K3D4	-0.259679	-0.257321
5529	Q7K3D4	Q7K3D4	-1.0006	-1.49136
5530	Q7K3D4	Q7K3D4	-0.840883	-0.801494
5531	Q7K3D4	Q7K3D4	2.35372	2.3573
5533	Q7K3D4	Q7K3D4	0.220786	0.245686
5539	Q7K3H0	Q7K3H0	-0.496767	-0.536623
5540	Q7K3J0	Q7K3J0	0.22709	0.230461
5542	Q7K3J0	Q7K3J0	-0.101538	-0.141413
5554	Q7K3Z3	Q7K3Z3	-0.0907927	-0.00531353
5563	Q7K4C7	Q7K4C7	-0.0278091	-0.0492479
5565	Q7K4G8	Q7K4G8	-0.204027	-0.0323296
5579	Q7K4I5	Q7K4I5	-0.254749	-0.131311
5580	Q7K4I5	Q7K4I5	0.101097	0.104697
5582	Q7K4L8	Q7K4L8	-0.385277	-0.367143
5586	Q7K4M4	Q7K4M4	-0.415399	-0.408805
5592	Q7K519	Q7K519	0.181011	0.166814
5597	Q7K556	Q7K556	-1.79662	-1.40826
5598	Q7K556	Q7K556	-1.61605	-1.72677
5599	Q7K556	Q7K556	-0.200109	-0.215652
5600	Q7K556	Q7K556	-0.32857	-0.370366
5601	Q7K556	Q7K556	-0.177672	-0.0395228
5605	Q7K738	Q7K738	-0.157633	-0.27261
5606	Q7K7W5	Q7K7W5	0.129757	0.146959
5607	Q7K7W5	Q7K7W5	0.129757	0.146959
5608	Q7K8Y3	Q7K8Y3	0.758098	0.68495
5617	Q7KLE5	Q7KLE5	-0.131318	-0.142889
5619	Q7KLE5	Q7KLE5	-0.225178	-0.263171
5625	Q7KLE5	Q7KLE5	-0.869527	-0.851709
5627	Q7KLE5	Q7KLE5	-0.272221	-0.235649
5628	Q7KLE5	Q7KLE5	-0.0106129	0.0361564
5629	Q7KM15	Q7KM15	0.0163184	0.0535178
5632	Q7KM15	Q7KM15	0.351296	0.412006
5638	Q7KMH9	Q7KMH9	0.101082	0.0497333
5639	Q7KMH9	Q7KMH9	0.312013	0.305756
5640	Q7KMH9	Q7KMH9	0.29895	0.332816
5641	Q7KMH9	Q7KMH9	0.237193	0.154718
5642	Q7KMH9	Q7KMH9	0.243408	0.307101
5648	Q7KMH9	Q7KMH9	-1.07617	-1.01462
5653	Q7KMI3	Q7KMI3	-0.0904641	-0.0958582
5674	Q7KMJ6	Q7KMJ6	-0.302265	-0.308412
5675	Q7KMJ6	Q7KMJ6	0.138292	0.129938
5676	Q7KMJ6	Q7KMJ6	-2.49128	-2.5306
5679	Q7KMQ0	Q7KMQ0	0.279066	0.299312
5681	Q7KN62	Q7KN62	0.313053	0.297808
5684	Q7KN85	Q7KN85	0.217075	0.118184
5685	Q7KN90	Q7KN90	1.12645	0.959605
5687	Q7KNA0	Q7KNA0	0.882844	0.847661
5690	Q7KND8	Q7KND8	0.0814317	0.0677219
5696	Q7KQM6	Q7KQM6	-0.34675	-0.407327
5697	Q7KQM6	Q7KQM6	-0.201296	-0.251541
5701	Q7KQM6	Q7KQM6	-0.0911082	-0.0915392
5707	Q7KQM6	Q7KQM6	-0.0444745	-0.0204515
5709	Q7KQM6	Q7KQM6	0.89308	1.14793
5710	Q7KQM6	Q7KQM6	-0.226627	-0.214365
5715	Q8IMG3	Q8IMG3	0.360409	0.322907
5717	Q8IMG3	Q8IMG3	0.0144831	0.0530226
5718	Q8IMG3	Q8IMG3	0.227778	0.228201
5719	Q8IMG3	Q8IMG3	-0.295434	-0.284063
5720	Q8IMG3	Q8IMG3	0.006164	0.136123
5722	Q7KRW8	Q7KRW8	0.119983	0.197314
5723	Q7KRW8	Q7KRW8	-0.372021	-0.378566
5726	Q7KRW8	Q7KRW8	-0.120313	-0.144278
5728	Q7KRW8	Q7KRW8	0.0122219	0.0159533
5729	Q7KRW8	Q7KRW8	0.156743	0.0783327
5735	Q9VB04	Q9VB04	0.212861	0.364648
5737	Q9VB04	Q9VB04	0.133498	0.0407789
5740	Q9VBI4	Q9VBI4	-0.160279	-0.204328
5741	Q9VBI4	Q9VBI4	-0.00504647	-0.124444
5742	Q7KSB7	Q7KSB7	-0.184162	-0.185741
5748	Q7KSD3	Q7KSD3	-0.545415	-0.525642
5749	Q7KSD3	Q7KSD3	0.279072	0.310655
5750	Q7KSD3	Q7KSD3	0.321677	0.345052
5755	Q7KSE0	Q7KSE0	-0.779259	-0.780706
5756	Q7KSE0	Q7KSE0	-0.363246	-0.310052
5758	Q7KSE0	Q7KSE0	-0.0212289	-0.0107961
5760	Q9VGG9	Q9VGG9	0.159389	0.193009
5761	Q9VGG9	Q9VGG9	0.203394	0.134247
5762	Q7KSP6	Q7KSP6	0.449138	0.441848
5765	Q7KTD2	Q7KTD2	0.552002	0.516479
5766	Q7KTD2	Q7KTD2	0.565762	0.535471
5773	Q7KTD2	Q7KTD2	0.944475	0.924172
5786	Q7KTG2	Q7KTG2	-0.283525	0.0303917
5787	Q7KTG2	Q7KTG2	-0.120492	-0.0648222
5795	Q7KTI0	Q7KTI0	-0.21499	-0.447675
5796	Q9VM57	Q9VM57	-0.120057	-0.0581937
5799	Q9VM57	Q9VM57	-0.735177	-0.728077
5806	Q7KTS2	Q7KTS2	-0.428411	-0.395921
5807	Q7KTS2	Q7KTS2	0.334036	0.501324
5808	Q7KTS2	Q7KTS2	0.471198	0.524478
5810	Q9VNG4	Q9VNG4	0.0785026	0.0834807
5811	Q9VNG4	Q9VNG4	-0.0474521	-0.0639728
5812	Q7KTV5	Q7KTV5	0.293741	0.275822
5815	Q7KU01	Q7KU01	-2.08192	-2.01995
5816	Q7KU01	Q7KU01	0.177637	0.263939
5817	Q7KU01	Q7KU01	-0.083256	-0.0918138
5818	Q7KU01	Q7KU01	-0.07303	-0.107032
5822	Q7KU01	Q7KU01	0.577567	0.524937
5827	Q7KU01	Q7KU01	0.125863	0.0855855
5830	Q7KU82	Q7KU82	-0.388285	-0.49848
5832	Q7KU82	Q7KU82	0.255875	0.37034
5833	Q7KU82	Q7KU82	1.18739	1.2025
5834	Q7KU82	Q7KU82	0.0455805	-0.0382925
5835	Q7KU82	Q7KU82	-0.402472	-0.401983
5836	Q7KU82	Q7KU82	0.207116	0.0338792
5838	Q7KU82	Q7KU82	0.155098	0.148564
5839	Q7KU82	Q7KU82	1.71989	1.58748
5840	Q7KU82	Q7KU82	1.71989	1.58748
5841	Q7KUA4	Q7KUA4	0.205553	0.160518
5843	Q7KUA4	Q7KUA4	-0.420709	-0.479226
5844	Q7KUA4	Q7KUA4	-0.201531	-0.23846
5847	Q7KUA4	Q7KUA4	-0.0637758	-0.052795
5848	Q7KUA4	Q7KUA4	-0.121458	-0.117633
5849	Q7KUA4	Q7KUA4	0.317106	0.327423
5851	Q9VT60	Q9VT60	-0.111973	-0.106534
5853	Q9VT60	Q9VT60	-0.276907	-0.276728
5855	Q9VT60	Q9VT60	-0.617638	-0.551058
5856	Q9VT60	Q9VT60	-0.147805	-0.0899598
5857	Q9VT60	Q9VT60	0.235068	0.241837
5858	Q9VT60	Q9VT60	0.2455	0.231788
[truncated: 2,405 more rows]

## Sheet: Phospho_Deviation_Anova+
Phospho_ID	Uniprot ID	Majority protein IDs	Log2 Deviation DLVtl	Log2 Deviation DLVsp
34	E5DK16	E5DK16	-0.271382	-0.283468
95	A0A0B4LHP1	A0A0B4LHP1	-0.824721	-0.69867
115	A0A0B4JD46	A0A0B4JD46	-0.166823	-0.149704
124	Q59E58	Q59E58	0.00466211	-0.0126153
169	Q9VNA1;Q8MSQ5	Q9VNA1	-1.01422	-0.997169
177	A0A0B4K623	A0A0B4K623	0.570678	0.542887
208	A0A0B4K680	A0A0B4K680	-0.72687	-0.796883
244	Q9VG78	Q9VG78	-0.0927955	0.0448389
309	A0A0B4K6W1	A0A0B4K6W1	-0.331438	-0.262471
340	A0A0B4KHR8	A0A0B4KHR8	-0.125612	-0.0899809
371	A0A0B4K7G4	A0A0B4K7G4	0.306221	0.24706
372	A0A0B4K7G4	A0A0B4K7G4	0.29686	0.296365
374	D3DN23	D3DN23	0.0956616	0.0422337
395	A0A0B4K7S0	A0A0B4K7S0	0.086055	0.0789025
417	A0A0B4K7Y7	A0A0B4K7Y7	0.116745	0.127059
459	A1Z945	A1Z945	0.333307	0.321007
464	A0A0B4K863	A0A0B4K863	0.0566173	-0.145391
468	A0A0B4K863	A0A0B4K863	-0.79626	-0.821175
501	A1Z6Z3	A1Z6Z3	0.0716108	0.0782793
558	Q95RL2	Q95RL2	-0.785619	-0.91709
587	A0A0B4KEV9	A0A0B4KEV9	0.511848	0.529982
634	Q0E965	Q0E965	0.254888	0.316654
647	A0A0B4KFA4	A0A0B4KFA4	-0.903811	-0.906152
675	A0A0B4KFE9	A0A0B4KFE9	0.272289	0.272723
691	Q7K304	Q7K304	-1.19163	-1.16367
776	A0A0B4KG81	A0A0B4KG81	0.430226	0.430372
782	A0A0B4KG81	A0A0B4KG81	-0.164578	0.245266
787	A0A0B4KG81	A0A0B4KG81	-0.0498481	-0.126878
793	Q9N6D7	Q9N6D7	-0.142653	-0.0124918
817	A0A0B4KHS6;A0A0B4KGI7	A0A0B4KGI7	0.296515	0.223718
877	A0A0B4KH16	A0A0B4KH16	1.0995	0.928592
915	A0A0B4LIK5	A0A0B4LIK5	0.734169	0.58141
923	A0A0B4LIK5	A0A0B4LIK5	-0.301976	-0.31265
928	A0A0B4LIK5	A0A0B4LIK5	-0.03434	-0.105577
939	A0A0B4KHJ5	A0A0B4KHJ5	0.275731	0.273007
944	A0A0B4KHJ5	A0A0B4KHJ5	0.368497	0.272941
960	A0A0B4KHP8	A0A0B4KHP8	0.255436	0.299554
982	A0A0B4KHW3	A0A0B4KHW3	0.690753	0.656006
985	A0A0B4KHY4	A0A0B4KHY4	0.59854	0.573184
989	A0A0B4KHY6	A0A0B4KHY6	0.0459083	-0.061017
994	A0A0B4KHY8	A0A0B4KHY8	-0.522834	-0.548175
1020	Q9VAY4	Q9VAY4	0.312171	0.142904
1056	A0A0B4KI71;Q8IMF5	Q8IMF5	-0.997696	-0.894618
1061	A0A0B4KI71	A0A0B4KI71	0.239735	0.269688
1082	A0A0B4LEV8	A0A0B4LEV8	0.01318	-0.0129477
1085	A0A0B4LEV8	A0A0B4LEV8	-0.0460081	-0.0704027
1101	A1Z9M4	A1Z9M4	0.177759	0.21944
1119	A0A0B4LF57	A0A0B4LF57	-0.161681	-0.135264
1151	A0A0B4LFJ4	A0A0B4LFJ4	-0.229014	-0.23756
1152	A0A0B4LFJ4	A0A0B4LFJ4	-0.136322	-0.163492
1158	A0A0B4LFL2	A0A0B4LFL2	0.16825	-0.0896037
1160	A0A0B4LFL2	A0A0B4LFL2	-0.0190933	-0.18252
1168	A0A0B4LFL3	A0A0B4LFL3	-0.201319	-0.172159
1282	A0A0B4LGZ6	A0A0B4LGZ6	-0.0572231	-0.121455
1382	A0A0S0WIA2	A0A0S0WIA2	-0.0915892	-0.0978711
1383	A0A0S0WIA2	A0A0S0WIA2	0.044372	-0.028238
1384	A0A0S0WIA2	A0A0S0WIA2	-0.0810832	-0.127106
1388	A0A0S0X2W5;Q960D3	Q960D3	-0.191157	-0.148047
1389	A0A0S0X2W5	A0A0S0X2W5	0.511373	0.546592
1398	A0A126BEE6	A0A126BEE6	-1.08828	-1.22295
1423	A0A140SRF8	A0A140SRF8	0.670481	0.466748
1441	A1A708	A1A708	-0.332414	-0.327853
1442	A1A708	A1A708	-0.360218	-0.355744
1482	A1Z6I7	A1Z6I7	-0.0712945	-0.0402765
1510	A1Z768	A1Z768	1.09911	1.56649
1544	A1Z898	A1Z898	0.21221	0.315437
1637	A1Z9S6	A1Z9S6	0.951905	0.912588
1651	A1Z9S6	A1Z9S6	-0.310232	-0.265976
1661	A1ZA92	A1ZA92	0.342422	0.354336
1734	A8E6M1	A8E6M1	-0.0622817	-0.110092
1743	A1ZBE9	A1ZBE9	0.3244	0.312101
1755	A1ZBH8	A1ZBH8	0.0163865	0.0173284
1786	A1ZBT6	A1ZBT6	-0.668732	-0.618095
1795	A1ZBW7	A1ZBW7	-0.196877	-0.40897
1808	A1ZBW7	A1ZBW7	-0.355797	-0.374043
1819	Q9W061	Q9W061	0.977743	0.799207
1839	A4V0R4	A4V0R4	0.0643868	0.101014
1846	A4V0R4	A4V0R4	-0.00650842	-0.0698736
1875	A4V2K7	A4V2K7	0.400823	0.391998
1893	A4V3G8	A4V3G8	-0.300585	0.140653
1903	A4V3G8	A4V3G8	-0.0404777	-0.109415
1929	A4V3W8	A4V3W8	-0.164963	-0.255477
1933	A4V448	A4V448	0.438898	0.516458
1956	Q0E8U6	Q0E8U6	-1.18945	-1.1618
1976	X2JDY7	X2JDY7	0.108747	0.00099525
2014	M9PBL6	M9PBL6	-0.296729	-0.344398
2107	A8JV07	A8JV07	-0.44005	-0.438638
2185	B7YZQ7	B7YZQ7	0.0251512	-0.00909044
2227	B7YZZ9	B7YZZ9	0.138506	0.0642972
2258	B7Z002	B7Z002	-0.0693486	-0.196493
2275	B7Z002	B7Z002	-0.833232	-0.777015
2286	B7Z002	B7Z002	0.097304	0.12788
2326	B7Z098	B7Z098	-0.140095	-0.110357
2329	B7Z0B0	B7Z0B0	-0.43648	-0.408094
2397	B7Z0I8	B7Z0I8	-0.999438	-0.986024
2431	B7Z0I8	B7Z0I8	-0.111739	-0.0847143
2493	M9PHW9	M9PHW9	-0.151074	-0.222589
2494	M9PHW9	M9PHW9	-0.161345	-0.261038
2495	M9PHW9	M9PHW9	-0.493369	-0.447686
2516	C7LAG1;Q59E36	Q59E36	-0.214103	-0.156284
2517	C7LAG1;Q59E36	Q59E36	0.000193764	0.149513
2519	M9PHG2	M9PHG2	0.263795	0.23949
2559	D3DMM4	D3DMM4	-0.126647	0.218057
2570	D3PFH9	D3PFH9	-0.29383	-0.331271
2576	E1JGK6	E1JGK6	0.992722	0.965343
2581	E1JGV6	E1JGV6	0.0825517	0.0821873
2607	E1JHA4	E1JHA4	-0.665128	-0.583464
2745	E8NH59	E8NH59	0.177535	0.151716
2814	Q9VWI1	Q9VWI1	-0.312866	-0.36754
2815	Q9VWI1	Q9VWI1	-1.25847	-1.29813
2822	E2QC56	E2QC56	-0.00546623	-0.0426469
2874	E2QCZ5	E2QCZ5	-0.135585	-0.0289062
2924	F3YDJ5	F3YDJ5	0.422894	0.431525
3006	H8F4V5	H8F4V5	0.0105077	-0.000759967
3015	L0MLP2	L0MLP2	-0.147381	-0.0927088
3073	X2JDP6	X2JDP6	0.033744	0.0785876
3076	M9PCJ7	M9PCJ7	0.192894	0.133349
3167	M9NCM6	M9NCM6	-0.468233	-0.502927
3230	M9NCX1	M9NCX1	0.353587	0.362307
3245	M9ND37	M9ND37	1.20186	1.14149
3246	M9ND37	M9ND37	0.328401	0.346602
3247	M9ND37	M9ND37	-0.47383	-0.37928
3248	M9ND37	M9ND37	-0.548387	-0.540797
3252	M9ND37	M9ND37	0.269149	0.23342
3311	M9NDR2	M9NDR2	-0.693321	-0.762732
3341	M9NEA7;M9NG31	M9NEA7	-0.826915	-0.613378
3358	M9NEL1	M9NEL1	0.396991	0.411944
3360	M9NEL1	M9NEL1	0.517173	0.527871
3382	M9NEW2	M9NEW2	0.142039	-0.0458319
3383	M9NEW2	M9NEW2	0.142039	-0.0458319
3398	M9NF67	M9NF67	-0.830618	-0.821404
3399	M9NF67	M9NF67	-0.830618	-0.821404
3416	M9NFQ5	M9NFQ5	-0.991623	-0.960295
3420	M9NFQ5	M9NFQ5	-0.92728	-0.96528
3450	M9NFV3	M9NFV3	0.116155	0.199121
3457	M9NG39	M9NG39	0.349798	0.306295
3513	M9PB85	M9PB85	0.0590114	0.44112
3542	M9PDQ0	M9PDQ0	-0.0479174	-0.110642
3565	M9PE73	M9PE73	0.24264	0.241572
3613	M9PCC1	M9PCC1	0.241156	0.150271
3640	M9PCQ8	M9PCQ8	0.184473	0.20777
3689	Q0E8R8	Q0E8R8	-0.631654	-0.515396
3690	Q0E8R8	Q0E8R8	-0.47117	-0.406955
3704	M9PD75	M9PD75	-0.211238	-0.236237
3715	M9PD95	M9PD95	0.661277	0.817103
3763	M9PEG8	M9PEG8	-0.10052	-0.0707453
3777	Q7KUD6	Q7KUD6	0.0280336	-0.0525488
3788	M9PEU5	M9PEU5	0.143649	0.176504
3796	M9PF14;Q9VTZ0	M9PF14	-1.11109	-1.24292
3849	M9PFY2	M9PFY2	0.298268	0.300178
3908	M9PFZ1;Q7KTV5	Q7KTV5	0.581469	0.381607
4051	M9PHL0	M9PHL0	0.811937	0.780674
4079	M9PI17	M9PI17	0.0475645	-0.00247262
4115	Q9VPB2	Q9VPB2	0.178218	0.112725
4128	M9PJC7	M9PJC7	-0.112582	-0.0725616
4151	N0D8I3	N0D8I3	-0.255975	-0.25589
4176	O02649;Q9VMN5	O02649	0.0382514	0.0506489
4190	O16102	O16102	-0.010513	-0.0303673
4286	O62602	O62602	-0.625635	-0.656777
4319	O96838	O96838	1.26819	1.46636
4349	X2JD55	X2JD55	0.154164	0.093767
4358	X2JD55	X2JD55	-0.154585	-0.141794
4369	X2JB25	X2JB25	0.535522	0.245697
4414	P05205	P05205	0.232569	0.289076
4415	P05389	P05389	0.210701	0.28356
4416	P05389	P05389	0.064905	0.135325
4424	P06605	P06605	0.314747	0.282255
4431	X2JEX8	X2JEX8	0.128915	0.282828
4439	X2JEX8	X2JEX8	-0.0708697	-0.00845016
4466	P13060	P13060	1.03291	0.759033
4471	P13496	P13496	0.84462	1.08893
4472	P13496	P13496	0.812198	1.03816
4491	P15348	P15348	0.32102	0.213845
4494	P15348	P15348	0.338964	0.333569
4495	P15348	P15348	0.0809974	0.0859452
4502	P17210	P17210	0.162534	0.145421
4521	P20240	P20240	-0.0408146	-0.0400006
4536	P20439	P20439	-0.113876	-0.0494111
4538	P21187	P21187	0.142214	0.123776
4561	P23128	P23128	-0.983221	-0.984394
4563	Q8IMF5	Q8IMF5	0.3324	0.379539
4570	P25007	P25007	0.230661	0.245255
4588	P25991	P25991	0.059188	0.0530274
4590	P25991	P25991	0.047401	0.0645809
4605	P29327	P29327	0.575429	0.542239
4611	P29327	P29327	0.551611	0.515062
4636	P34739	P34739	0.179099	0.175721
4660	P35600	P35600	-0.0246095	-0.0575408
4664	P35600	P35600	0.355592	0.312937
4711	P42207	P42207	-1.39629	-1.37597
4726	P45437	P45437	0.141704	0.105263
4759	P49963	P49963	-0.203175	-0.174962
4777	P54353	P54353	0.393766	0.527672
4780	P54397	P54397	0.281617	0.257696
4781	P54397	P54397	0.114412	0.108746
4799	P61851	P61851	0.321394	0.272203
4806	P81900	P81900	0.0516908	-0.0170246
4842	P98159	P98159	-0.420405	-0.38945
4843	P98159	P98159	-0.421397	-0.385763
4849	Q01637	Q01637	0.322355	0.336289
4898	Q0E8J0	Q0E8J0	-0.284582	-0.359001
4903	Q0E8J0	Q0E8J0	-0.0347715	-0.107204
4977	Q23973	Q23973	0.0440699	0.0240662
4983	Q24050	Q24050	0.187999	0.474494
5001	Q24168	Q24168	0.209023	0.148761
5039	Q24472	Q24472	0.0144483	-0.0103505
5043	Q24478	Q24478	0.337341	0.406872
5048	Q24478	Q24478	0.168388	0.165864
5076	Q24574	Q24574	0.104561	-0.0909575
5089	Q24574	Q24574	0.0129636	-0.0881681
5164	Q2PE14	Q2PE14	-0.116261	-0.117821
5168	Q32KD2	Q32KD2	-0.0846929	-0.0818674
5169	Q32KD2	Q32KD2	0.0967209	-0.105539
5207	Q4U2Q5	Q4U2Q5	-0.285301	0.162225
5211	Q4V3Z5	Q4V3Z5	0.13468	0.142612
5243	Q5BI31	Q5BI31	0.274953	0.333787
5244	Q5BI31	Q5BI31	0.274953	0.333787
5269	Q5U0V7	Q5U0V7	0.0586337	0.334015
5282	Q5U0X8	Q5U0X8	1.1181	1.09476
5307	Q6NQZ5	Q6NQZ5	0.0274286	0.0106448
5328	Q7JRE4	Q7JRE4	-0.319695	-0.348806
5344	Q7JRH5	Q7JRH5	-0.0629666	0.0210818
5362	Q7JVL3	Q7JVL3	0.234363	0.305734
5379	Q7JVY2	Q7JVY2	0.0535198	0.110765
5394	Q7JW66	Q7JW66	0.0447871	0.0738497
5408	Q7JXZ2	Q7JXZ2	-0.124079	-0.140126
5429	Q7K0D8	Q7K0D8	0.132864	0.152346
5466	Q7K130	Q7K130	0.547015	0.550471
5565	Q7K4G8	Q7K4G8	-0.204027	-0.0323296
5605	Q7K738	Q7K738	-0.157633	-0.27261
5685	Q7KN90	Q7KN90	1.12645	0.959605
5726	Q7KRW8	Q7KRW8	-0.120313	-0.144278
5749	Q7KSD3	Q7KSD3	0.279072	0.310655
5750	Q7KSD3	Q7KSD3	0.321677	0.345052
5787	Q7KTG2	Q7KTG2	-0.120492	-0.0648222
5795	Q7KTI0	Q7KTI0	-0.21499	-0.447675
5799	Q9VM57	Q9VM57	-0.735177	-0.728077
5833	Q7KU82	Q7KU82	1.18739	1.2025
5836	Q7KU82	Q7KU82	0.207116	0.0338792
5857	Q9VT60	Q9VT60	0.235068	0.241837
5858	Q9VT60	Q9VT60	0.2455	0.231788
5878	Q9W4C4	Q9W4C4	-0.880599	-0.866082
5891	Q7KW09	Q7KW09	-0.0801202	-0.0338335
5947	Q7YZ99	Q7YZ99	0.339649	0.309269
5948	Q7YZ99	Q7YZ99	0.327266	0.266876
6018	Q9VLL3;Q8IPF5	Q9VLL3	0.0869501	0.0607536
6022	Q9VLL3;Q8IPF5	Q9VLL3	-0.0960172	-0.0202511
6028	Q9VLL3	Q9VLL3	0.682859	0.758044
6058	Q86BY9	Q86BY9	-0.536963	-0.493056
6113	Q9VD13	Q9VD13	-0.901712	-0.836013
6138	Q8INH7	Q8INH7	0.350066	0.321333
6139	Q8INH7	Q8INH7	0.509425	0.516891
6141	Q8INJ6	Q8INJ6	0.037462	-0.0654543
6154	Q8INM3	Q8INM3	0.0765685	0.0332733
6166	Q8INM3	Q8INM3	-0.148737	-0.159467
6174	Q8INM3	Q8INM3	0.0299763	0.0110825
6189	Q8INM3	Q8INM3	-0.238676	-0.232739
6204	Q8INM3	Q8INM3	0.177391	0.201871
6205	Q8INM3	Q8INM3	-0.244978	-0.190391
6233	Q8INX3	Q8INX3	0.466945	0.446574
6242	Q8IP94	Q8IP94	0.0484161	0.0348223
6254	Q9VMX2	Q9VMX2	0.530754	0.618769
6257	Q8IPU7	Q8IPU7	-0.365263	-0.389968
6258	Q8IPU7	Q8IPU7	-0.387301	-0.411308
6308	Q9VWB8	Q9VWB8	0.395065	0.429351
6342	Q8IRB5	Q8IRB5	0.533508	0.462688
6346	Q8IRB5	Q8IRB5	0.0114934	-0.152933
6347	Q8IRB5	Q8IRB5	-0.122081	-0.24246
6370	Q8IRB5	Q8IRB5	-0.170571	-0.232838
6457	Q8MRI4	Q8MRI4	-0.275778	-0.195449
6458	Q8MRI4	Q8MRI4	-0.35947	-0.279141
6467	Q8MS69	Q8MS69	-0.277231	-0.237609
6468	Q8MS69	Q8MS69	0.31556	0.439501
6532	Q8SX76	Q8SX76	-0.0571802	-0.0548561
6545	Q8SX89	Q8SX89	0.515667	0.582479
6548	Q8SX89	Q8SX89	-0.0292122	0.0235794
6553	Q8SXI2	Q8SXI2	-0.148551	-0.163949
6570	Q8SY19	Q8SY19	0.315656	0.339402
6584	Q8SYR5	Q8SYR5	0.453995	0.426488
6590	Q8T051	Q8T051	0.396907	0.423655
6618	Q8T626	Q8T626	0.385996	0.372834
6631	Q8T9B6	Q8T9B6	0.0586034	0.09698
6648	Q94524	Q94524	0.158084	0.132041
6651	X2JD82	X2JD82	0.287401	0.295981
6659	Q94546	Q94546	0.0822444	0.00298442
6714	Q94883	Q94883	-0.149651	-0.0641852
6744	Q95RX5	Q95RX5	-1.18464	-1.17346
6772	Q960D3;Q9V426	Q960D3	-0.0758389	-0.050954
6776	Q960D3	Q960D3	-0.701423	-0.682135
6799	Q9VEH0	Q9VEH0	-0.126187	-0.16183
6834	Q9GQN5	Q9GQN5	-0.280096	-0.288114
6835	Q9GQN5	Q9GQN5	-0.183725	-0.264874
6844	Q9GQR5	Q9GQR5	-0.134025	-0.166466
6854	Q9GYU8	Q9GYU8	0.540369	0.527754
6909	Q9U5L1	Q9U5L1	0.478767	0.310109
6910	Q9U5L1	Q9U5L1	0.875472	0.848478
6914	Q9U9P7	Q9U9P7	1.27062	1.41505
6948	Q9V3E9	Q9V3E9	0.164351	0.142453
6954	Q9V3E9	Q9V3E9	0.101828	0.0425715
6960	Q9V3F9	Q9V3F9	-0.0797323	-0.0493125
6976	Q9V3H9	Q9V3H9	0.147906	0.168522
6977	Q9V3H9	Q9V3H9	0.28611	0.306726
7044	Q9V3Y0	Q9V3Y0	-0.0724944	-0.0750555
7077	Q9V426	Q9V426	0.0961626	0.134201
7079	Q9V426	Q9V426	0.000820205	0.00569047
7080	Q9V431	Q9V431	0.114805	0.121264
7103	Q9V468	Q9V468	0.117312	0.094196
7109	Q9V468	Q9V468	-0.00882075	0.00114622
7146	Q9V4F3	Q9V4F3	1.20782	1.00868
7179	Q9V677	Q9V677	0.712805	0.6567
7186	Q9V6K1	Q9V6K1	0.376405	0.291358
7188	Q9V6K1	Q9V6K1	0.0764982	0.0747544
7213	Q9V9T4	Q9V9T4	1.1199	1.16398
7221	Q9V9U3	Q9V9U3	0.362969	0.369704
7266	Q9VAL0	Q9VAL0	0.369298	0.323512
7268	Q9VAL0	Q9VAL0	0.366089	0.320198
7279	Q9VAM5	Q9VAM5	0.201504	0.00731337
7295	Q9VAN6	Q9VAN6	-0.290493	-0.20935
7299	Q9VAN8	Q9VAN8	-0.121374	-0.118655
7310	Q9VAU6	Q9VAU6	-0.161996	-0.206517
7321	Q9VAW1	Q9VAW1	0.618472	0.564659
7322	Q9VAW1	Q9VAW1	0.182283	0.132726
7326	Q9VAW1	Q9VAW1	0.373063	0.340523
7345	Q9VAY8	Q9VAY8	0.13403	0.136189
7347	Q9VAZ0	Q9VAZ0	-0.751314	-0.707383
7353	Q9VB10	Q9VB10	0.449089	0.591353
7376	Q9VB52	Q9VB52	-0.0212812	-0.153427
7400	Q9VBN5	Q9VBN5	0.6559	0.682468
7411	Q9VBP9	Q9VBP9	-0.860128	-0.923767
7416	Q9VBU7	Q9VBU7	0.377903	0.395402
7428	Q9VBU7	Q9VBU7	-0.751799	-0.665465
7429	Q9VBU7	Q9VBU7	-1.01141	-0.872581
7433	Q9VBU7	Q9VBU7	0.643419	0.545668
7453	Q9VBX1	Q9VBX1	0.1594	0.392129
7464	Q9VBY9	Q9VBY9	-0.0859582	-0.0233012
7474	Q9VC08	Q9VC08	0.190252	0.151983
7510	Q9VC54	Q9VC54	0.50391	0.359855
7511	Q9VC54	Q9VC54	0.50391	0.359855
7569	Q9VC63	Q9VC63	-0.0122341	0.0351196
7579	Q9VC94	Q9VC94	-0.0600613	-0.161929
7598	Q9VC96	Q9VC96	-0.615975	-0.566168
7628	Q9VCF1	Q9VCF1	0.291948	0.260481
7631	Q9VCF1	Q9VCF1	0.175624	0.146581
7633	Q9VCG0	Q9VCG0	0.948673	0.922
7651	Q9VCH5	Q9VCH5	-0.194523	-0.101806
7653	Q9VCH5	Q9VCH5	0.12514	0.147125
7655	Q9VCH8	Q9VCH8	1.328	1.38222
7698	Q9VCW3	Q9VCW3	0.220799	0.331085
7746	Q9VDE3	Q9VDE3	0.382095	0.190553
7751	Q9VDE5	Q9VDE5	-0.409942	-0.336725
7762	Q9VDG2	Q9VDG2	-0.270157	-0.250024
7767	Q9VDK7	Q9VDK7	-0.168058	-0.0787579
7837	Q9VEJ1	Q9VEJ1	0.163052	0.205731
7838	Q9VEJ1	Q9VEJ1	0.0152789	0.0908914
7853	Q9VEM2	Q9VEM2	0.0851013	0.113267
7862	Q9VEP6	Q9VEP6	0.130789	0.0866815
7863	Q9VEP9	Q9VEP9	-0.0055863	-0.063954
7864	Q9VEP9	Q9VEP9	0.0589837	0.0103094
7873	Q9VEV3	Q9VEV3	0.697533	0.676447
7888	Q9VF03	Q9VF03	0.110495	0.0678074
7906	Q9VF20	Q9VF20	-0.107756	-0.0789124
7952	Q9VG45	Q9VG45	-0.452771	-0.354767
7953	Q9VG45	Q9VG45	-0.177664	-0.032852
7955	Q9VG59	Q9VG59	-0.835563	-0.911292
7958	Q9VG62	Q9VG62	0.492655	0.510915
7993	Q9VGI8	Q9VGI8	-0.170703	-0.167641
8005	Q9VGL0	Q9VGL0	-0.0102371	-0.115762
8007	Q9VGL0	Q9VGL0	0.00946665	0.0291422
8056	Q9VHC0	Q9VHC0	0.178411	0.205297
8057	Q9VHC0	Q9VHC0	0.304453	0.302655
8063	Q9VHC0	Q9VHC0	0.222291	0.239991
8089	Q9VHC8	Q9VHC8	-0.731461	-0.516238
8114	Q9VHK1	Q9VHK1	-0.339466	-0.291518
8124	Q9VHN7	Q9VHN7	0.173386	0.171301
8139	Q9VHR6	Q9VHR6	0.421491	0.384678
8177	Q9VID9	Q9VID9	-0.182161	-0.181697
8212	Q9VIF0	Q9VIF0	0.203647	0.208788
8213	Q9VIF1	Q9VIF1	0.58108	0.590614
8214	Q9VIF1	Q9VIF1	-0.452945	-0.395754
8293	Q9VJ12	Q9VJ12	-0.225856	-0.235995
8305	X2J6U8	X2J6U8	-0.884175	-0.862137
8307	X2J6U8	X2J6U8	-0.438731	-0.374185
8314	Q9VJ57	Q9VJ57	0.298718	0.267013
8325	Q9VJ87	Q9VJ87	0.245663	0.187691
8363	Q9VJQ4	Q9VJQ4	0.0522786	0.0795345
8364	Q9VJQ4	Q9VJQ4	0.311383	0.318243
8385	Q9VK04;Q9VK06	Q9VK06	0.0751787	0.0358324
8396	Q9VK39	Q9VK39	0.546263	0.722624
8397	Q9VK39	Q9VK39	0.628899	0.760395
8435	Q9VKD2	Q9VKD2	0.200655	0.152933
8456	Q9VKK1	Q9VKK1	-0.792898	-0.749621
8511	Q9VL18	Q9VL18	0.26989	0.174912
8513	Q9VL18	Q9VL18	0.214638	0.341039
8527	Q9VL71	Q9VL71	0.0116742	0.0854077
8537	Q9VL71	Q9VL71	0.328927	0.364018
8548	Q9VL72	Q9VL72	0.216018	0.192836
8551	X2J5E8	X2J5E8	-0.46729	-0.407266
8562	Q9VLC5	Q9VLC5	-0.196681	-0.158021
8583	Q9VLV5	Q9VLV5	0.124397	0.110071
8600	Q9VM60	Q9VM60	-0.801339	-0.784159
8606	Q9VM69	Q9VM69	0.310233	0.128175
8636	Q9VME5	Q9VME5	-0.533628	-0.649616
8637	Q9VME5	Q9VME5	-0.415186	-0.546828
8661	Q9VME5	Q9VME5	-0.096521	-0.0406723
8678	Q9VMP8	Q9VMP8	0.389279	0.240629
8685	X2J4N6	X2J4N6	0.90184	0.894626
8702	Q9VN21	Q9VN21	0.1007	0.166499
8751	Q9VNE0	Q9VNE0	-0.123628	-0.0921121
8765	Q9VNE0	Q9VNE0	-0.865129	-0.852089
8766	Q9VNE0	Q9VNE0	-0.865129	-0.852089
8767	Q9VNE0	Q9VNE0	0.939874	0.924974
8768	Q9VNE0	Q9VNE0	0.939874	0.924974
8798	Q9VNE2	Q9VNE2	0.128348	0.100894
8799	Q9VNE2	Q9VNE2	0.36982	0.331572
8802	Q9VNE9	Q9VNE9	0.299241	0.28531
8823	Q9VNH6	Q9VNH6	0.597647	0.565168
8846	Q9VNW2	Q9VNW2	-0.220447	-0.185129
8847	Q9VNW2	Q9VNW2	-0.0446098	-0.0813007
8851	Q9VNX1	Q9VNX1	0.647299	0.706839
8868	Q9VP05	Q9VP05	-0.811705	-0.783359
8875	Q9VP57	Q9VP57	0.0148843	0.00582217
8934	Q9VPM5	Q9VPM5	1.49197	1.58455
8949	Q9VPN5	Q9VPN5	-0.0054409	0.151012
8951	Q9VPP5	Q9VPP5	-0.0384938	0.177479
8964	Q9VPU8	Q9VPU8	0.796163	0.792732
8993	Q9VQ58	Q9VQ58	-0.0225823	-0.00484053
8996	Q9VQ78	Q9VQ78	-0.247709	-0.275959
9065	Q9VQZ8	Q9VQZ8	0.302127	0.332357
9074	Q9VR17	Q9VR17	-1.37534	-1.47067
9093	Q9VR38	Q9VR38	0.52292	0.487403
9094	Q9VR38	Q9VR38	0.52292	0.487403
9132	Q9VRP5	Q9VRP5	0.332055	0.185427
9141	Q9VRP5	Q9VRP5	-1.05472	-0.992097
9149	Q9VRQ4	Q9VRQ4	-0.578852	-0.573101
9170	Q9VS50	Q9VS50	-0.847684	-0.805878
9171	Q9VS50	Q9VS50	-0.847684	-0.805878
9182	Q9VS57	Q9VS57	0.00618907	-0.0247191
9203	Q9VSF2	Q9VSF2	0.17616	0.19308
9216	Q9VSL4	Q9VSL4	-0.157022	-0.22503
9218	Q9VSM9	Q9VSM9	0.025209	0.030002
9221	Q9VSM9	Q9VSM9	0.390052	0.333182
9224	Q9VSS2	Q9VSS2	0.483007	0.470556
9260	Q9VT61	Q9VT61	0.993001	1.18977
9280	Q9VT61	Q9VT61	0.299734	0.124344
9283	Q9VTC1	Q9VTC1	0.164531	0.157333
9327	Q9VTN7	Q9VTN7	-0.205191	-0.239751
9334	Q9VTT2	Q9VTT2	-0.218837	-0.230176
9358	Q9VTZ4	Q9VTZ4	0.297405	0.255808
9417	Q9VU43	Q9VU43	-0.155544	-0.155954
9440	Q9VU88	Q9VU88	0.395518	0.451616
9461	Q9VUB8	Q9VUB8	-0.871277	-0.862483
9555	Q9VV52	Q9VV52	1.18368	1.24631
9568	Q9VV74	Q9VV74	0.183251	0.221207
9681	Q9VW47	Q9VW47	-0.504474	-0.577411
9754	Q9VWK5	Q9VWK5	0.837657	0.930106
9810	X2JFP6	X2JFP6	-0.404929	-0.395931
9821	X2JFP6	X2JFP6	-0.0264772	-0.003041
9859	Q9VX95	Q9VX95	1.97683	1.95688
9860	Q9VX95	Q9VX95	0.669534	0.680933
9868	X2JKQ8	X2JKQ8	-0.028808	-0.0759165
9921	Q9VXQ5	Q9VXQ5	0.769458	0.656615
9928	X2JF83	X2JF83	0.097265	0.0513518
9935	Q9VXU6	Q9VXU6	0.0422385	0.0424973
9976	Q9VY91	Q9VY91	0.310991	0.221355
9992	Q9VY97	Q9VY97	0.470043	0.528628
10068	Q9VYV4	Q9VYV4	-0.821899	-0.80866
10082	Q9VYW4	Q9VYW4	-0.410449	-0.87095
10083	Q9VYW4	Q9VYW4	0.373723	0.380878
10138	Q9VZ20	Q9VZ20	0.381456	0.298859
10140	Q9VZ20	Q9VZ20	-1.22187	-1.21452
10170	Q9VZE6	Q9VZE6	0.16534	0.254442
10194	Q9VZS7	Q9VZS7	0.189654	0.08869
10240	Q9W0A8	Q9W0A8	0.370337	0.353147
10309	Q9W198	Q9W198	0.0421454	0.151214
10326	Q9W1A9	Q9W1A9	0.922461	0.937032
10331	Q9W1C8	Q9W1C8	-0.1753	-0.111918
10356	Q9W1H8	Q9W1H8	-0.0974839	-0.0861463
10469	Q9W2S1	Q9W2S1	0.473665	0.441364
10489	Q9W2U7	Q9W2U7	0.38793	0.423892
10501	Q9W2U7	Q9W2U7	0.0330802	0.0360984
10502	Q9W2U7	Q9W2U7	0.114779	0.148681
10505	Q9W2U7	Q9W2U7	-0.969743	-0.924896
10529	Q9W335	Q9W335	-0.0807443	-0.0326828
10530	Q9W335	Q9W335	0.419782	0.429984
10582	Q9W3D1	Q9W3D1	0.0307269	0.0652624
10583	Q9W3D1	Q9W3D1	0.186393	0.259611
10594	Q9W3D2	Q9W3D2	0.379968	0.338256
10646	X2JE07	X2JE07	-0.232411	-0.249578
10660	X2JE07	X2JE07	-0.168704	-0.163002
10734	Q9W425	Q9W425	0.211573	0.207312
10754	Q9W464	Q9W464	0.0771197	0.059802
10756	Q9W464	Q9W464	0.675257	0.678894
10792	Q9W4K1	Q9W4K1	0.233127	0.280756
10794	Q9W4K1	Q9W4K1	0.978735	0.806992
10804	Q9W4M7	Q9W4M7	-0.182979	-0.258505
10815	Q9W4M7	Q9W4M7	-0.10558	-0.169011
10842	Q9W526	Q9W526	0.0639815	0.136903
10854	Q9W541	Q9W541	0.32142	0.339698
10872	Q9W584	Q9W584	-0.0571722	0.114841
10874	Q9W584	Q9W584	0.813598	0.791072
10889	Q9W5Q1	Q9W5Q1	-0.385287	-0.356861
10895	Q9W5R5	Q9W5R5	0.698791	0.71016
10949	Q9XZ21	Q9XZ21	-0.123365	-0.190266
10953	Q9XZ21	Q9XZ21	0.0424922	0.0218613
10976	Q9XZ21	Q9XZ21	-0.318637	-0.265426
10977	Q9XZ21	Q9XZ21	-0.336467	-0.275419
11003	Q9XZ29	Q9XZ29	-0.125609	-0.110892
11008	Q9XZ34	Q9XZ34	0.56276	0.513351
11051	Q9Y109	Q9Y109	0.0490175	0.025714
11055	Q9Y109	Q9Y109	-0.780112	-0.906759
11066	Q9Y118	Q9Y118	0.704817	0.406779
11645	A4V2K7	A4V2K7	0.053882	0.0751592
11650	A4V3G8	A4V3G8	-0.112081	0.311863
11671	M9NCY3	M9NCY3	0.33563	0.237138
11719	B7YZZ9	B7YZZ9	0.0203777	0.150905
11831	E1JIL4;Q24572	Q24572	-0.13042	-0.0845007
11870	L0MLP2	L0MLP2	-0.384917	-0.436793
11955	Q9VVA4	Q9VVA4	0.012247	0.04642
11963	M9NG39	M9NG39	0.572793	0.587474
11993	M9PBL3	M9PBL3	0.141483	-0.0634196
12025	M9PEJ1	M9PEJ1	-0.499668	-0.447054
12093	O16043	O16043	0.0760345	0.0355376
12109	O16810	O16810	0.176013	0.207861
12180	P23572	P23572	-0.0185097	-0.0779555
12222	P46863	P46863	-0.381729	-0.316681
12340	Q4V3Z5	Q4V3Z5	0.212736	0.212465
12417	Q7KKI0	Q7KKI0	0.83334	0.828478
12420	Q7KM15;Q9VPR2	Q7KM15	-0.612332	-0.559721
12460	Q7KU82	Q7KU82	0.557303	0.644704
12471	Q9W4C4	Q9W4C4	-0.0898443	-0.0282186
12486	Q7YZ99	Q7YZ99	0.505039	0.435221
12495	Q9VLL3;Q8IPF5	Q9VLL3	-0.532169	-0.513447
12676	Q9U9P7	Q9U9P7	1.37741	1.52733
12708	Q9V471	Q9V471	0.364282	0.316903
12755	Q9VAU6	Q9VAU6	-0.372343	-0.407023
12802	Q9VCH5	Q9VCH5	-0.152658	-0.10306
12878	Q9VHC0	Q9VHC0	0.304453	0.302655
12892	Q9VHI8	Q9VHI8	0.23456	0.200649
12927	Q9VIP9	Q9VIP9	-0.475548	-0.409349
12955	Q9VK85	Q9VK85	0.14879	0.115978
12975	Q9VL70	Q9VL70	-0.0340517	0.0337058
12983	Q9VLC5	Q9VLC5	-0.196681	-0.158021
12984	Q9VLD6	Q9VLD6	0.0560826	0.114002
13004	Q9VME5	Q9VME5	-0.352331	-0.445615
13020	Q9VN21	Q9VN21	0.204699	0.232024
13023	Q9VN21	Q9VN21	-0.123343	-0.0183939
13024	Q9VN21	Q9VN21	-0.0688209	-0.049351
13078	Q9VPR5	Q9VPR5	-0.230552	-0.166179
13170	Q9VU88	Q9VU88	0.395518	0.451616
13196	Q9VV52	Q9VV52	0.664168	0.725972
13210	Q9VVR6	Q9VVR6	-1.02685	-1.03566
13366	Q9W2S1	Q9W2S1	0.40544	0.349502
13459	Q9XZ21	Q9XZ21	-0.902889	-0.930198
13528	A1Z6I9	A1Z6I9	2.53813	2.55727
13558	P23572	P23572	0.0695649	0.0880688
13577	Q9VLC5	Q9VLC5	-0.196681	-0.158021
