# Supplementary material for: Differential regulation of the proteome and phosphoproteome along the dorso-ventral axis of the early Drosophila embryo
Source: eLife. 2024 Sep 2;13:e99263. doi: 10.7554/eLife.99263 (PMC11466282; doi:10.7554/eLife.99263)
Supplement: Supplementary file 7. — Empty cell in gene and protein name indicate the detected protein (or protein that hosts a phosphosite) had not been given a gene and/or a protein name in the Uniprot database version used in this study. [file elife-99263-supp7.xlsx]

## Sheet: LFQ_Proteome_Clustering
LFQ_ID	Protein IDs	Majority Protein ID	Gene Name	Protein Name	DV Cluster
409	A0A0B4LGB0;Q24007;Q8MLT4	A0A0B4LGB0;Q24007;Q8MLT4	Gp150		Dorsal (1)
4404	Q9VIQ4	Q9VIQ4	Hf		Dorsal (1)
3136	Q8SWS7	Q8SWS7	vito		Dorsal (1)
1747	O61444	O61444	Mkk4		Dorsal (1)
2881	Q86P36;A0A0B4KED8;A0A0B4KEC6	Q86P36	Ptr		Dorsal (1)
12	Q8IN56;Q9I7I8;A0A0B4JDD8;A0A0B4JDG2;B7Z0M9;Q7KSB3;A0A0B4JCZ0	Q8IN56;Q9I7I8;A0A0B4JDD8;A0A0B4JDG2;B7Z0M9;Q7KSB3;A0A0B4JCZ0		Oxysterol-binding protein	Dorsal (1)
5780	Q9VZQ7	Q9VZQ7			Dorsal (1)
65	A8JRH3;A0A0B4K6N4;O46231;E1JJ21;Q9VA56;Q9VA58;C7LAH8;A0A0B4KHF2;Q9VA59;A0A0B4K7R6;A0A0B4KHW6	A8JRH3;A0A0B4K6N4;O46231;E1JJ21;Q9VA56;Q9VA58;C7LAH8;A0A0B4KHF2;Q9VA59;A0A0B4K7R6;A0A0B4KHW6	tmod;tmod-RC		Dorsal (1)
72	A0A0B4K6V8	A0A0B4K6V8	alpha-Est5		Dorsal (1)
74	A0A0B4K6W6;A0A0B4LHH4;A0A0B4K6D0	A0A0B4K6W6;A0A0B4LHH4;A0A0B4K6D0	wake		Dorsal (1)
87	A0A0B4K876;A0A0B4K7Z6;A0A0B4K7A3;Q7YU81;A0A0B4K7Q9	A0A0B4K876;A0A0B4K7Z6;A0A0B4K7A3;Q7YU81	chn	Protein charlatan	Dorsal (1)
175	A1Z7C4;A0A0B4KFD1	A1Z7C4;A0A0B4KFD1	LRP1		Dorsal (1)
210	A0A0B4KFT5	A0A0B4KFT5	GstS1		Dorsal (1)
224	A0A0B4KG16;Q9VF36	A0A0B4KG16;Q9VF36	Acyp2	Acylphosphatase-2	Dorsal (1)
271	A0A0B4KH34;P22464	A0A0B4KH34;P22464	AnxB9	Annexin;Annexin B9	Dorsal (1)
327	A0A0B4KI19;Q9VBP3	A0A0B4KI19;Q9VBP3	Tnks	Tankyrase	Dorsal (1)
349	A0A0B4LEX6;A1Z920;A1Z921	A0A0B4LEX6;A1Z920;A1Z921	fra		Dorsal (1)
355	A0A0B4LF45;P82712	A0A0B4LF45;P82712	Cyp12d1-p	Probable cytochrome P450 12d1 proximal, mitochondrial	Dorsal (1)
426	A0A0B4LGL5;Q8MSU3	A0A0B4LGL5;Q8MSU3	CG8399	Putative ferric-chelate reductase 1 homolog	Dorsal (1)
432	A0A0B4LGR6;P41046	A0A0B4LGR6;P41046	corto	Centrosomal and chromosomal factor	Dorsal (1)
491	A0A0C4DHE6;Q9VFS5	A0A0C4DHE6;Q9VFS5	flfl	Serine/threonine-protein phosphatase 4 regulatory subunit 3	Dorsal (1)
518	A0A126GUS4;Q86BA1;A0A0B4K703;A0A0B4K6D5;A0A126GUS6;A0A0B4K6N6	A0A126GUS4;Q86BA1;A0A0B4K703;A0A0B4K6D5;A0A126GUS6;A0A0B4K6N6	Mical	Protein-methionine sulfoxide oxidase Mical	Dorsal (1)
557	A1Z6Z9;A1Z6Z8;A1Z700	A1Z6Z9;A1Z6Z8;A1Z700	didum		Dorsal (1)
558	A1Z705	A1Z705	CG2144-RA		Dorsal (1)
566	A1Z768;Q7JY33	A1Z768;Q7JY33	rnh1		Dorsal (1)
615	A1Z8I8;A1Z8I6;Q7JWT7;B7YZF1	A1Z8I8			Dorsal (1)
622	A1Z8T3	A1Z8T3	CG18343-RA		Dorsal (1)
650	A1Z9K0	A1Z9K0			Dorsal (1)
687	Q7K5N8;A1ZAU4	Q7K5N8;A1ZAU4	CG4847-RD		Dorsal (1)
702	A1ZB72	A1ZB72	GstE7		Dorsal (1)
705	A1ZB86	A1ZB86	slim	Kelch domain-containing protein 10 homolog	Dorsal (1)
715	A1ZBK6	A1ZBK6	CG11257-RA		Dorsal (1)
738	A4UZ51;E1JGY2;P34021	A4UZ51;E1JGY2;P34021	EcR	Ecdysone receptor	Dorsal (1)
753	A4V1B2;Q9NB04	A4V1B2;Q9NB04	Patj	Patj homolog	Dorsal (1)
756	Q7JQ32;A4V243	Q7JQ32;A4V243	Gyc76C	Guanylate cyclase	Dorsal (1)
827	A8E6W0	A8E6W0	CG34039-RA		Dorsal (1)
844	A8JNV1	A8JNV1			Dorsal (1)
910	B7YZS7;Q9V4L4	B7YZS7;Q9V4L4	kappaB-Ras	NF-kappa-B inhibitor-interacting Ras-like protein	Dorsal (1)
938	B7Z0D7;Q9VSE1	B7Z0D7;Q9VSE1			Dorsal (1)
945	B7Z0I5	B7Z0I5	CG42245-RA		Dorsal (1)
965	B7Z138;Q9W2X2;X2JB32;Q8IRL5;X2JD61;X2JEC6;X2JEP7;X2JJ95;B7Z140;X2JB38	B7Z138;Q9W2X2;X2JB32;Q8IRL5;X2JD61;X2JEC6;X2JEP7;X2JJ95;B7Z140;X2JB38	CG34408-RA		Dorsal (1)
1042	D1FYH5;Q9VAJ4	D1FYH5;Q9VAJ4	Obp99a	General odorant-binding protein 99a	Dorsal (1)
1044	D1YSG7;Q00168;L0MLR4;L0MLP2	D1YSG7;Q00168;L0MLR4;L0MLP2	CaMKII	Calcium/calmodulin-dependent protein kinase type II alpha chain	Dorsal (1)
1090	E1JHD6;P92208	E1JHD6;P92208	bsk	Mitogen-activated protein kinase;Stress-activated protein kinase JNK	Dorsal (1)
1134	E1JIV6;O62618	E1JIV6;O62618	p38a;Mpk2	Mitogen-activated protein kinase;Mitogen-activated protein kinase 14A	Dorsal (1)
1154	E1JJL4;P30432;E1JJL5	E1JJL4;P30432	Fur2	Furin-like protease 2	Dorsal (1)
1163	Q9VRA4;E1JJS1	Q9VRA4;E1JJS1	GstT3		Dorsal (1)
1193	E8NHB1;Q24325	E8NHB1;Q24325	Taf2	Transcription initiation factor TFIID subunit 2	Dorsal (1)
1209	G4LTX1;Q8IQ56	G4LTX1;Q8IQ56	PGRP-LD-RB;Pmi	Transmembrane protein 11 homolog, mitochondrial	Dorsal (1)
1221	H8F4T6;Q9V6U9	H8F4T6;Q9V6U9	CG16935-RA;CG16935	Probable trans-2-enoyl-CoA reductase, mitochondrial	Dorsal (1)
1282	M9NCM6;M9PDR5;Q8SX83;M9PBZ3;M9PBJ8	M9NCM6;M9PDR5;Q8SX83;M9PBZ3;M9PBJ8	spen	Protein split ends	Dorsal (1)
1296	M9ND93;M9PCJ5;Q400N2;M9PFP0;M9PI63;M9PFA8;M9PFJ2;M9PCK2;M9NFV3;M9PFA3;M9PFP4;Q400N1	M9ND93;M9PCJ5;Q400N2;M9PFP0;M9PI63;M9PFA8;M9PFJ2;M9PCK2;M9NFV3;M9PFA3;M9PFP4	Plp		Dorsal (1)
1318	M9NE01;Q27889	M9NE01;Q27889	Pp2B-14D	Serine/threonine-protein phosphatase;Serine/threonine-protein phosphatase 2B catalytic subunit 2	Dorsal (1)
1333	M9NEU5;P25843	M9NEU5;P25843	chic	Profilin	Dorsal (1)
1343	Q9V3K7;M9NF32	Q9V3K7;M9NF32	BG:DS09217.4		Dorsal (1)
1353	M9NFH4;X2JEI9;E1JJS2;Q9VRA6	M9NFH4;X2JEI9;E1JJS2;Q9VRA6	RhoGAP19D		Dorsal (1)
1399	M9PBM3;Q9VPW2	M9PBM3;Q9VPW2	Atg4a		Dorsal (1)
1519	M9PED1;Q9VZZ7	M9PED1;Q9VZZ7	CG12182-RA		Dorsal (1)
1565	M9PFK4;P22468	M9PFK4;P22468	gdl	Gonadal protein gdl	Dorsal (1)
1573	Q9VUX0;M9PFN0	Q9VUX0;M9PFN0	CG5830-RA		Dorsal (1)
1611	M9PGG7	M9PGG7			Dorsal (1)
1663	M9PI18;Q9VRF7;M9PHP6	M9PI18;Q9VRF7;M9PHP6	CG32521-RB		Dorsal (1)
1685	O01382	O01382	Ice	Caspase;Caspase subunit p21;Caspase subunit p12	Dorsal (1)
1710	O18353;Q7KVG9	O18353;Q7KVG9	Chi		Dorsal (1)
1838	P02572	P02572	Act42A	Actin-42A	Dorsal (1)
1853	P06601	P06601	prd	Segmentation protein paired	Dorsal (1)
1871	P0DKM0	P0DKM0	Ccdc56	Cytochrome c oxidase assembly factor 3, mitochondrial	Dorsal (1)
1927	P20227	P20227	Tbp	TATA-box-binding protein	Dorsal (1)
1933	P20659	P20659	trx	Histone-lysine N-methyltransferase trithorax	Dorsal (1)
1939	P22469	P22469	Z600	Protein Z600	Dorsal (1)
1968	P25723	P25723	tld	Dorsal-ventral patterning protein tolloid	Dorsal (1)
1980	P29327	P29327	RpS6	40S ribosomal protein S6	Dorsal (1)
2048	P48555	P48555	Rala	Ras-related protein Ral-a	Dorsal (1)
2138	X2J950;Q03334	X2J950;Q03334	RpS13	40S ribosomal protein S13	Dorsal (1)
2162	Q0E8G6;Q9VSY2	Q0E8G6;Q9VSY2			Dorsal (1)
2199	Q0KHS7	Q0KHS7	Lsd-2		Dorsal (1)
2264	Q24324;X2JAZ3;REV__CON__Q28107	Q24324;X2JAZ3	Dsor1	Dual specificity mitogen-activated protein kinase kinase dSOR1	Dorsal (1)
2283	Q24592	Q24592	hop	Tyrosine-protein kinase hopscotch	Dorsal (1)
2342	Q4V6M1	Q4V6M1	Apf		Dorsal (1)
2356	Q8IR19;Q59E43	Q8IR19;Q59E43			Dorsal (1)
2365	Q5LJP6;A4V2C3;Q5LJP5;M9PGA6	Q5LJP6;A4V2C3;Q5LJP5;M9PGA6	CG17698-RA		Dorsal (1)
2430	Q7JR83	Q7JR83	Hsl		Dorsal (1)
2452	Q7JUS1	Q7JUS1	CG30491;CG30495		Dorsal (1)
2474	Q7JVZ8	Q7JVZ8	GstE11		Dorsal (1)
2476	Q7JW07	Q7JW07			Dorsal (1)
2513	Q7JY94;A1ZBA9	Q7JY94;A1ZBA9	Atg7		Dorsal (1)
2573	Q7K175	Q7K175	Hen1	Small RNA 2-O-methyltransferase	Dorsal (1)
2607	Q7K2K2;A0A0C4DHG4	Q7K2K2;A0A0C4DHG4	CG10265-RB		Dorsal (1)
2626	Q7K3H0	Q7K3H0	Pi3K68D		Dorsal (1)
2638	Q7K486	Q7K486	CG5721	Armadillo repeat-containing protein 6 homolog	Dorsal (1)
2657	Q7K4W1	Q7K4W1	CG6550	Threonylcarbamoyladenosine tRNA methylthiotransferase	Dorsal (1)
2668	Q7K569	Q7K569	Gpo-1	Glycerol-3-phosphate dehydrogenase	Dorsal (1)
2714	Q9V3L4;Q7KMQ6;Q9Y0B6	Q9V3L4;Q7KMQ6;Q9Y0B6	Pten		Dorsal (1)
2742	Q7KS11	Q7KS11	Ude		Dorsal (1)
2750	Q7KSQ0	Q7KSQ0	sea		Dorsal (1)
2765	Q7KTG2	Q7KTG2	Apoltp		Dorsal (1)
2812	Q7KVF6	Q7KVF6	CG33228-RA		Dorsal (1)
2818	Q7KVS9	Q7KVS9	Trf4-1		Dorsal (1)
2824	Q7KW09;Q9W554	Q7KW09;Q9W554			Dorsal (1)
2837	Q7PLI2;E1JGX3;A0A0B4KF23	Q7PLI2;E1JGX3;A0A0B4KF23	Nipped-B	Nipped-B protein	Dorsal (1)
2858	Q86B53	Q86B53	CG33172-RA		Dorsal (1)
2884	Q8I050	Q8I050			Dorsal (1)
2942	Q8INF7	Q8INF7	CG31320	Dynein assembly factor 5, axonemal	Dorsal (1)
3002	Q8IQD7;Q8IQD8;Q9VT88	Q8IQD7;Q8IQD8;Q9VT88	scramb1		Dorsal (1)
3045	Q8IRJ8	Q8IRJ8	thoc7	THO complex protein 7	Dorsal (1)
3054	Q8IRZ0;Q95RP8;X2JD78	Q8IRZ0;Q95RP8;X2JD78	CG3038-RB;EG:BACR37P7.1		Dorsal (1)
3096	Q8MS38	Q8MS38			Dorsal (1)
3116	Q8MT36;A0A0B4KHR6	Q8MT36;A0A0B4KHR6	Mes-4	Probable histone-lysine N-methyltransferase Mes-4;Histone-lysine N-methyltransferase	Dorsal (1)
3234	Q8T0G4	Q8T0G4	conu		Dorsal (1)
3249	Q8T481	Q8T481			Dorsal (1)
3250	Q8T4A9	Q8T4A9	Rrp45		Dorsal (1)
3260	Q8T8L8	Q8T8L8	Alg10	Putative Dol-P-Glc:Glc(2)Man(9)GlcNAc(2)-PP-Dol alpha-1,2-glucosyltransferase	Dorsal (1)
3376	Q9BLX1;Q9VWP6;X2JCH3	Q9BLX1;Q9VWP6;X2JCH3	Pvf1		Dorsal (1)
3395	Q9I7M8	Q9I7M8	Ku80	ATP-dependent DNA helicase II subunit 2	Dorsal (1)
3423	Q9NI63	Q9NI63	Myt1	Membrane-associated tyrosine- and threonine-specific cdc2-inhibitory kinase	Dorsal (1)
3438	Q9U6M0	Q9U6M0	ECSIT	Evolutionarily conserved signaling intermediate in Toll pathway, mitochondrial	Dorsal (1)
3441	Q9U8L5;M9PBY6	Q9U8L5;M9PBY6	Doc1		Dorsal (1)
3453	Q9V3A4	Q9V3A4	Catsup	Protein catecholamines up	Dorsal (1)
3539	Q9V433;Q59E27;Q7YZ98	Q9V433;Q59E27;Q7YZ98	RecQ5		Dorsal (1)
3547	X2J4W8;Q9V447	X2J4W8;Q9V447	Kr-h2	Krueppel homolog 2	Dorsal (1)
3551	Q9V455	Q9V455	Kap-alpha3	Importin subunit alpha	Dorsal (1)
3570	Q9V4E5;Q8IMC2;Q0KIF4;D1YSF9;Q59DQ4	Q9V4E5;Q8IMC2;Q0KIF4;D1YSF9;Q59DQ4	Eph	Receptor protein-tyrosine kinase	Dorsal (1)
3680	Q9VAI1	Q9VAI1	CG7598	Probable complex I intermediate-associated protein 30, mitochondrial	Dorsal (1)
3802	Q9VBY6	Q9VBY6	PQBP1		Dorsal (1)
3824	Q9VC52	Q9VC52	Ppox		Dorsal (1)
3903	Q9VCY2	Q9VCY2	Dph5		Dorsal (1)
3934	Q9VDD8	Q9VDD8	Usp8	Ubiquitin carboxyl-terminal hydrolase	Dorsal (1)
3956	Q9VDL5	Q9VDL5	CG15922-RA		Dorsal (1)
3995	Q9VE58	Q9VE58			Dorsal (1)
3996	Q9VE69;Q8MQJ5;A0A0B4KGF5	Q9VE69;Q8MQJ5;A0A0B4KGF5	CG7687		Dorsal (1)
4025	Q9VEF0	Q9VEF0			Dorsal (1)
4035	Q9VEK7;Q8IN97	Q9VEK7;Q8IN97	CREG		Dorsal (1)
4055	Q9VET3	Q9VET3			Dorsal (1)
4093	Q9VF87	Q9VF87	Sra-1	Cytoplasmic FMR1-interacting protein	Dorsal (1)
4122	Q9VFM0	Q9VFM0			Dorsal (1)
4132	Q9VFS6	Q9VFS6	omd		Dorsal (1)
4156	Q9VG45	Q9VG45	Dtg		Dorsal (1)
4159	Q9VG60	Q9VG60			Dorsal (1)
4167	Q9VG81	Q9VG81			Dorsal (1)
4186	Q9VGF7	Q9VGF7	GC1		Dorsal (1)
4198	Q9VGM2;Q8INK3;Q8INK2	Q9VGM2;Q8INK3;Q8INK2	fabp		Dorsal (1)
4208	Q9VGP9	Q9VGP9	KP78a		Dorsal (1)
4216	Q9VGT3	Q9VGT3	Ugt86Da		Dorsal (1)
4237	Q9VH13	Q9VH13			Dorsal (1)
4242	Q9VH37	Q9VH37			Dorsal (1)
4252	Q9VH77	Q9VH77		Mannose-6-phosphate isomerase	Dorsal (1)
4266	Q9VHB5	Q9VHB5	Vps45		Dorsal (1)
4269	Q9VHB9	Q9VHB9	trmt44	Probable tRNA (uracil-O(2)-)-methyltransferase	Dorsal (1)
4360	Q9VI82	Q9VI82	CG1234	Nucleolar complex protein 3 homolog	Dorsal (1)
4466	X2JEJ1;Q9VJ97	X2JEJ1;Q9VJ97	CG7200	JmjC domain-containing protein 4 homolog	Dorsal (1)
4497	X2JE06;Q9VJY6	X2JE06;Q9VJY6	RpL24	60S ribosomal protein L24	Dorsal (1)
4582	Q9VKR2	Q9VKR2	CG17118		Dorsal (1)
4586	Q9VKU5	Q9VKU5			Dorsal (1)
4587	Q9VKU7	Q9VKU7	Grip75	Gamma-tubulin complex component 4 homolog	Dorsal (1)
4595	Q9VKW3	Q9VKW3	RfC3		Dorsal (1)
4602	Q9VKZ7	Q9VKZ7	CG4972-RA	Nicalin	Dorsal (1)
4659	Q9VLM7	Q9VLM7			Dorsal (1)
4665	Q9VLP3	Q9VLP3	CG7787	Guanine nucleotide exchange factor MSS4 homolog	Dorsal (1)
4684	X2J564;Q9VLT1	X2J564;Q9VLT1	mon2	Protein MON2 homolog	Dorsal (1)
4688	X2JDI9;Q9VLU3	X2JDI9;Q9VLU3			Dorsal (1)
4702	Q9VM17	Q9VM17	CG5181	SOSS complex subunit B homolog	Dorsal (1)
4738	Q9VMI1	Q9VMI1	Fbw5		Dorsal (1)
4773	Q9VMW8	Q9VMW8	CG3792	Mannose-P-dolichol utilization defect 1 protein homolog	Dorsal (1)
4781	Q9VMY9	Q9VMY9	DhpD		Dorsal (1)
4857	Q9VNX4	Q9VNX4	P5CDh1		Dorsal (1)
4929	Q9VPR6	Q9VPR6	Ipk2		Dorsal (1)
5008	Q9VQR9	Q9VQR9	CG17593-RA		Dorsal (1)
5101	Q9VRV8	Q9VRV8	Trn		Dorsal (1)
5232	Q9VTL1	Q9VTL1	PCID2	PCI domain-containing protein 2 homolog	Dorsal (1)
5256	Q9VTW1;X2JB05;Q9VTW0;X2JGL7	Q9VTW1;X2JB05;Q9VTW0;X2JGL7			Dorsal (1)
5264	Q9VTZ2	Q9VTZ2	ver		Dorsal (1)
5372	Q9VVA9	Q9VVA9			Dorsal (1)
5408	Q9VVP9	Q9VVP9			Dorsal (1)
5452	Q9VW57	Q9VW57	Grasp65		Dorsal (1)
5460	Q9VW84	Q9VW84			Dorsal (1)
5495	Q9VWJ9	Q9VWJ9	CG7889-RA		Dorsal (1)
5553	Q9VX87	Q9VX87			Dorsal (1)
5582	Q9VXH7	Q9VXH7	CG9917-RA		Dorsal (1)
5624	Q9VXV4	Q9VXV4			Dorsal (1)
5625	Q9VXV6	Q9VXV6	Scamp		Dorsal (1)
5648	Q9VY54;Q9VY50	Q9VY54	l(1)G0007		Dorsal (1)
5650	Q9VY76;Q76NR0;M9NDW2	Q9VY76;Q76NR0	AMPdeam		Dorsal (1)
5734	Q9VZ34	Q9VZ34			Dorsal (1)
5746	Q9VZ69	Q9VZ69	Imp		Dorsal (1)
5798	Q9VZX8	Q9VZX8			Dorsal (1)
5825	Q9W0A8	Q9W0A8	RpL23A		Dorsal (1)
5839	Q9W0E2	Q9W0E2			Dorsal (1)
5912	Q9W1B0	Q9W1B0	gek	Serine/threonine-protein kinase Genghis Khan	Dorsal (1)
6024	Q9W2S3	Q9W2S3	BTBD9		Dorsal (1)
6032	Q9W2Y3	Q9W2Y3	CG2974	NAD(P)H-hydrate epimerase	Dorsal (1)
6072	Q9W3C8	Q9W3C8			Dorsal (1)
6092	Q9W3J9	Q9W3J9			Dorsal (1)
6118	Q9W3T5	Q9W3T5	CG32736	Small integral membrane protein 4	Dorsal (1)
6133	Q9W3X3	Q9W3X3			Dorsal (1)
6168	Q9W482	Q9W482	lin-52		Dorsal (1)
6229	Q9W526	Q9W526	EG:67A9.2		Dorsal (1)
2498	Q7JX94	Q7JX94			Dorsal (1)
2611	Q7K2Q5	Q7K2Q5			Dorsal (1)
6259	Q9W5T4;A0A0B4LFP2	Q9W5T4;A0A0B4LFP2			Dorsal (1)
4894	Q9VPE0	Q9VPE0			Dorsal (1)
6248	X2JDC1;Q9W5D0	X2JDC1;Q9W5D0	CG43867	Uncharacterized protein CG43867	Dorsal (1)
6271	Q9XYF4	Q9XYF4	Nc	Caspase Nc;Caspase Nc subunit 1;Caspase Nc subunit 2	Dorsal (1)
4629	Q9VL69	Q9VL69	BEST:CK01296		Dorsal (1)
4573	Q9VKM8	Q9VKM8			Dorsal (1)
4418	Q9VIV5	Q9VIV5	CG18094-RA		Dorsal (1)
4417	Q9VIV3	Q9VIV3	CG10189	Cytoplasmic tRNA 2-thiolation protein 2	Dorsal (1)
4057	Q9VEU9	Q9VEU9	CG14883-RA		Dorsal (1)
3841	Q9VCB8	Q9VCB8	jnj		Dorsal (1)
3675	Q9VAG5	Q9VAG5	ca		Dorsal (1)
3617	Q9V9J3	Q9V9J3	Src42A	Tyrosine-protein kinase Src42A	Dorsal (1)
3595	Q9V6G5;A0A0B4JD45	Q9V6G5;A0A0B4JD45	Taz	Tafazzin homolog	Dorsal (1)
3220	Q8T007;Q9VGL7	Q8T007;Q9VGL7			Dorsal (1)
3156	Q8SX81	Q8SX81			Dorsal (1)
2487	Q7JWI7	Q7JWI7			Dorsal (1)
2484	Q7JWG9	Q7JWG9	mRpL52	39S ribosomal protein L52, mitochondrial	Dorsal (1)
2336	Q4V604	Q4V604			Dorsal (1)
2247	Q24173;M9PEL6	Q24173;M9PEL6	betaggt-I		Dorsal (1)
2120	P91638	P91638	smid		Dorsal (1)
1619	M9PGK7;Q7YU15;Q9W0Q4;A8JNH2;M9PBH0;X2J8G9;M9PDJ0;X2JAH4;A8JNH1	M9PGK7;Q7YU15;Q9W0Q4;A8JNH2	klar		Dorsal (1)
1409	Q9VRR4;Q8I935;M9PBR6;Q8I934	Q9VRR4;Q8I935;M9PBR6;Q8I934	Vap-33B		Dorsal (1)
1275	M9MSI6;Q9V3N8	M9MSI6;Q9V3N8	l(2)35Bc	tRNA(His) guanylyltransferase;Probable tRNA(His) guanylyltransferase	Dorsal (1)
1114	E1JIB4;Q9VZW2;Q8MRH9	E1JIB4;Q9VZW2;Q8MRH9	CG2162-RB		Dorsal (1)
1070	E1JGN5;Q0E910;Q7KN83;D5AEP3	E1JGN5;Q0E910;Q7KN83;D5AEP3	CG8920-RD;CG8920-RC		Dorsal (1)
525	A0A126GUX4	A0A126GUX4			Dorsal (1)
168	Q7JQL5;A0A0B4KF86	Q7JQL5;A0A0B4KF86	Atg9		Dorsal (1)
79	A0A0B4K6Z0;A0A0B4K6G8;A0A0B4KGT0;A0A0B4K6E1;A0A0B4KHP5;P20482	A0A0B4K6Z0;A0A0B4K6G8;A0A0B4KGT0;A0A0B4K6E1;A0A0B4KHP5;P20482	cnc	Segmentation protein capncollar	Dorsal (1)
5446	Q9VW45;M9PFY4	Q9VW45	Fibp		Dorsal (1)
6322	Q9Y117	Q9Y117	pgant3	Polypeptide N-acetylgalactosaminyltransferase 3	Dorsal (1)
16	A0A126GV04;A0A0B4JCZ4;Q24547	A0A126GV04;A0A0B4JCZ4;Q24547	Syx1A	Syntaxin-1A	Dorsal (1)
50	A0A0B4K6C3;Q9VHS2	A0A0B4K6C3;Q9VHS2	CG9603	Probable cytochrome c oxidase subunit 7A, mitochondrial	Lateral (2)
5253	Q9VTV3;Q8IQG9	Q9VTV3;Q8IQG9	Adk1		Lateral (2)
5263	Q9VTZ1	Q9VTZ1	Gcn5		Lateral (2)
5310	Q9VUI8;M9NE98	Q9VUI8;M9NE98			Lateral (2)
5327	Q9VUR2	Q9VUR2			Lateral (2)
5352	Q9VV47	Q9VV47			Lateral (2)
5382	Q9VVE2	Q9VVE2	rogdi	Protein rogdi	Lateral (2)
5413	Q9VVS4	Q9VVS4	MED11	Mediator of RNA polymerase II transcription subunit 11	Lateral (2)
5517	Q9VWS7	Q9VWS7	CG15047-RA		Lateral (2)
5550	Q9VX75;X2JFU8;X2JCB3;Q0KHR3	Q9VX75;X2JFU8;X2JCB3;Q0KHR3	baz		Lateral (2)
5654	Q9VY91	Q9VY91	Pdcd4		Lateral (2)
5717	Q9VYX4	Q9VYX4	Kmn1		Lateral (2)
5749	Q9VZC8	Q9VZC8			Lateral (2)
5765	Q9VZI1;M9PE30	Q9VZI1;M9PE30	Chd64	Transgelin	Lateral (2)
5821	Q9W086	Q9W086	mRpL46		Lateral (2)
5844	Q9W0G7	Q9W0G7	msd1		Lateral (2)
5856	Q9W0M4	Q9W0M4			Lateral (2)
5880	Q9W0X8	Q9W0X8	BcDNA:GH03108		Lateral (2)
5887	Q9W112	Q9W112			Lateral (2)
5890	Q9W125	Q9W125	ND-19		Lateral (2)
5900	Q9W148	Q9W148	uri		Lateral (2)
5935	Q9W1I9	Q9W1I9	shu	Inactive peptidyl-prolyl cis-trans isomerase shutdown	Lateral (2)
5943	Q9W1N8	Q9W1N8	mi		Lateral (2)
5983	Q9W289	Q9W289	GM130		Lateral (2)
5986	Q9W298	Q9W298			Lateral (2)
5989	Q9W2D6	Q9W2D6	Tim10	Mitochondrial import inner membrane translocase subunit Tim10	Lateral (2)
6006	Q9W2I4	Q9W2I4	Sgf29		Lateral (2)
6023	Q9W2S2;X2JJA8;X2JEE0	Q9W2S2	Atg8a		Lateral (2)
6040	Q9W333	Q9W333			Lateral (2)
6043	Q9W347;M9PHH0	Q9W347;M9PHH0	c12.2		Lateral (2)
6057	Q9W385	Q9W385	fh	Frataxin homolog, mitochondrial	Lateral (2)
6068	Q9W3C2	Q9W3C2	CG1785	Uncharacterized protein CG1785	Lateral (2)
6085	X2JEI6;Q9W3G7	X2JEI6;Q9W3G7			Lateral (2)
6114	Q9W3S3	Q9W3S3			Lateral (2)
6139	Q9W3Y3	Q9W3Y3			Lateral (2)
6184	Q9W4H8	Q9W4H8	Pp2C1		Lateral (2)
6223	Q9W501	Q9W501	temp		Lateral (2)
6225	Q9W511	Q9W511	EG:17E2.1		Lateral (2)
6247	Q9W5C2	Q9W5C2	TRAM	Translocating chain-associated membrane protein	Lateral (2)
6255	Q9W5P1	Q9W5P1	MED21	Mediator of RNA polymerase II transcription subunit 21	Lateral (2)
6278	Q9XYZ4	Q9XYZ4	mre11		Lateral (2)
6293	Q9XZ22	Q9XZ22			Lateral (2)
3793	Q9VBW9	Q9VBW9	danr	Protein distal antenna-related	Lateral (2)
3832	Q9VC66	Q9VC66			Lateral (2)
3892	Q9VCV3	Q9VCV3			Lateral (2)
3906	Q9VD02	Q9VD02			Lateral (2)
3910	Q9VD14	Q9VD14			Lateral (2)
3972	Q9VDU7	Q9VDU7	Naam		Lateral (2)
1824	O97428;Q8IRS7	O97428;Q8IRS7	cib		Lateral (2)
3982	Q9VDZ8;Q9VDZ7	Q9VDZ8;Q9VDZ7	CG11779-RB	Mitochondrial import inner membrane translocase subunit TIM44	Lateral (2)
3988	Q9VE12	Q9VE12			Lateral (2)
4157	Q9VG51	Q9VG51	Snx3		Lateral (2)
4178	Q9VGE2	Q9VGE2	Spt3		Lateral (2)
4227	Q9VGY8	Q9VGY8			Lateral (2)
4233	Q9VH00	Q9VH00			Lateral (2)
4297	Q9VHJ3	Q9VHJ3	E(var)3-9		Lateral (2)
1842	X2JB25;P02844	X2JB25;P02844	Yp2	Vitellogenin-2	Lateral (2)
4320	Q9VHR6	Q9VHR6	Atg13	Autophagy-related protein 13 homolog	Lateral (2)
4399	Q9VIP1	Q9VIP1	Taf13		Lateral (2)
4444	X2J935;Q9VJ33	X2J935;Q9VJ33	Nedd8	NEDD8	Lateral (2)
4510	Q9VK20	Q9VK20			Lateral (2)
4571	X2JA36;Q9VKM6	X2JA36;Q9VKM6	YL-1	Vacuolar protein sorting-associated protein 72 homolog	Lateral (2)
4576	Q9VKP5	Q9VKP5			Lateral (2)
4605	Q9VL00	Q9VL00	CG4968	Ubiquitin thioesterase otubain-like	Lateral (2)
1850	P05389	P05389	RpLP2	60S acidic ribosomal protein P2	Lateral (2)
4653	Q9VLK8	Q9VLK8	fu2		Lateral (2)
1857	X2JEX8;P06607;Q4V566;Q9VPH3;M9NFL7	X2JEX8;P06607	Yp3	Vitellogenin-3	Lateral (2)
4683	Q9VLS9	Q9VLS9	CG12375	Beta-lactamase-like protein 2 homolog	Lateral (2)
1923	P19538;H9XVL7;H9XVL6;A0A0B4KEP0;A0A0B4KGM2;Q962I0;Q7K0S9	P19538;H9XVL7	ci	Transcriptional activator cubitus interruptus;Transcriptional repressor cubitus interruptus	Lateral (2)
4692	Q9VLV5	Q9VLV5	SmE	Probable small nuclear ribonucleoprotein E	Lateral (2)
4709	Q9VM50	Q9VM50	Rab30		Lateral (2)
4714	Q9VM63	Q9VM63	Gas41		Lateral (2)
4723	Q9VMB3	Q9VMB3			Lateral (2)
4725	Q9VMB9	Q9VMB9	COX5B		Lateral (2)
4761	Q9VMR6	Q9VMR6	CG12512-RA		Lateral (2)
4807	Q9VNB2	Q9VNB2			Lateral (2)
4810	Q9VND2	Q9VND2	Snm1		Lateral (2)
1877	P11146	P11146	Hsc70-2	Heat shock 70 kDa protein cognate 2	Lateral (2)
4819	Q9VNE8	Q9VNE8			Lateral (2)
4861	Q9VNZ8	Q9VNZ8	Als2		Lateral (2)
4899	Q9VPF1	Q9VPF1	CG5199-RA		Lateral (2)
4954	Q9VQ35	Q9VQ35	mRpL48		Lateral (2)
4979	Q9VQF7	Q9VQF7	Bacc		Lateral (2)
4981	Q9VQF9	Q9VQF9	snapin	SNAPIN protein homolog	Lateral (2)
1931	P20432	P20432	GstD1	Glutathione S-transferase 1-1	Lateral (2)
5046	Q9VR62	Q9VR62			Lateral (2)
1936	P21520	P21520	sca	Protein scabrous	Lateral (2)
5183	Q9VSY6	Q9VSY6	aay	Phosphoserine phosphatase	Lateral (2)
5186	Q9VSZ2	Q9VSZ2			Lateral (2)
3762	Q9VBI0	Q9VBI0			Lateral (2)
3741	Q9VB51	Q9VB51			Lateral (2)
214	A0A126GUN5;A0A0B4KFU8;Q6AWG9	A0A126GUN5;A0A0B4KFU8;Q6AWG9	CG5098	Uncharacterized protein CG5098	Lateral (2)
161	A0A0B4KF05;Q9V359	A0A0B4KF05;Q9V359	Vps28	Vacuolar protein sorting-associated protein 28 homolog	Lateral (2)
282	A0A0B4KHN4;A0A0B4KHA2;Q9VEK6	A0A0B4KHN4;A0A0B4KHA2;Q9VEK6	Sur-8	Leucine-rich repeat protein soc-2 homolog	Lateral (2)
3722	Q9VAY7	Q9VAY7	CG12259	Protein FAM50 homolog	Lateral (2)
3701	Q9VAP3	Q9VAP3	CG11880	CTL-like protein 2	Lateral (2)
2015	P40688	P40688	swa	Protein swallow	Lateral (2)
1945	Q4H2F8;Q4H2F9;Q4H2F7;P22813	Q4H2F8;Q4H2F9;Q4H2F7;P22813	Hsf	Heat shock factor protein	Lateral (2)
140	A0A0B4KEK1;Q0E9C2;A0A0B4KET9;A0A0B4KFP2	A0A0B4KEK1;Q0E9C2;A0A0B4KET9;A0A0B4KFP2	E(Pc)	Enhancer of polycomb-like protein	Lateral (2)
2055	P48611	P48611	pr	6-pyruvoyl tetrahydrobiopterin synthase	Lateral (2)
3662	Q9VAB8	Q9VAB8			Lateral (2)
118	A0A0B4K833;Q24214;M9NFW6;P48451	A0A0B4K833;Q24214;M9NFW6;P48451	CanB2;CanB	Calcineurin subunit B type 2;Calcineurin subunit B type 1	Lateral (2)
2179	Q0E8X8	Q0E8X8			Lateral (2)
2200	Q0KHT7	Q0KHT7	Drak	Death-associated protein kinase related	Lateral (2)
2209	Q0KI15	Q0KI15			Lateral (2)
1822	O97418	O97418	ND-B14.5A		Lateral (2)
77	A0A0B4K6Y4;Q86B79	A0A0B4K6Y4;Q86B79	unk	RING finger protein unkempt	Lateral (2)
2272	Q24439	Q24439	Oscp	ATP synthase subunit O, mitochondrial	Lateral (2)
3646	Q9V9Z9	Q9V9Z9	CG1542	Probable rRNA-processing protein EBP2 homolog	Lateral (2)
2306	Q2PDR0	Q2PDR0	CG33977-RA		Lateral (2)
2331	Q4V4H7	Q4V4H7			Lateral (2)
3644	Q9V9Z1	Q9V9Z1	mRpL32	39S ribosomal protein L32, mitochondrial	Lateral (2)
5211	Q9VTB3	Q9VTB3			Lateral (2)
5235	Q9VTM0	Q9VTM0	pallidin	Biogenesis of lysosome-related organelles complex 1 subunit 6	Lateral (2)
2405	Q6QU65;Q400M8	Q6QU65;Q400M8	Meltrin		Lateral (2)
6341	Q9Y1B2	Q9Y1B2	Orc6	Origin recognition complex subunit 6	Lateral (2)
3626	Q9V9S8	Q9V9S8	FeCh	Ferrochelatase, mitochondrial	Lateral (2)
2409	Q6XPX3;Q8SZB2	Q6XPX3;Q8SZB2	sPLA2		Lateral (2)
2451	Q7JUN9	Q7JUN9			Lateral (2)
2496	Q7JX82	Q7JX82	kermit		Lateral (2)
2544	Q7K0D3	Q7K0D3			Lateral (2)
359	A0A0B4LF59;Q7KN79	A0A0B4LF59;Q7KN79	CG7686	Protein LTV1 homolog	Lateral (2)
391	A0A0B4LGV3;A0A0B4LFV9;A1ZAV3	A0A0B4LGV3;A0A0B4LFV9;A1ZAV3	MESR4		Lateral (2)
420	A0A0B4LGI1;P20354	A0A0B4LGI1;P20354	Galphas	G protein alpha s subunit	Lateral (2)
559	A1Z713	A1Z713	Vps13		Lateral (2)
695	A1ZAY5	A1ZAY5			Lateral (2)
798	Q8MRC7;Q9W5S7;Q9U4F5;A4V4V2;Q9TW27;Q9TW12	Q8MRC7;Q9W5S7;Q9U4F5;A4V4V2;Q9TW27;Q9TW12	DIP1		Lateral (2)
806	A8DYC5;A8DYC4	A8DYC5;A8DYC4	ND-MWFE		Lateral (2)
835	M9PEM7;M9PBU6;A8JNM3;Q7KU93;M9PEF2;Q7KU90;Q9VS85	M9PEM7;M9PBU6;A8JNM3;Q7KU93;M9PEF2;Q7KU90;Q9VS85	lqf		Lateral (2)
922	B7Z005;Q9VPU3;E1JHR0;Q8MRM4;E1JHR1	B7Z005;Q9VPU3;E1JHR0;Q8MRM4;E1JHR1	drongo		Lateral (2)
986	C8VV14;P07764	C8VV14;P07764	Ald-RC;Ald	Fructose-bisphosphate aldolase	Lateral (2)
1064	D8FT19;M9PCH3;Q9XZ28	D8FT19;M9PCH3;Q9XZ28	CG7115-RB		Lateral (2)
1120	Q961C3;Q9VH75;E1JIH4	Q961C3;Q9VH75;E1JIH4			Lateral (2)
1165	E2QC61;Q7K480	E2QC61;Q7K480	bin3	Probable RNA methyltransferase bin3	Lateral (2)
1208	G3M3A2;Q06559	G3M3A2;Q06559	RpS3	40S ribosomal protein S3	Lateral (2)
1262	M9MRY3;P16905;M9MS72;M9MS37;H1UUF3;Q9VPA7;M9MS76	M9MRY3;P16905;M9MS72;M9MS37;H1UUF3;Q9VPA7;M9MS76	Pka-R1	cAMP-dependent protein kinase type I regulatory subunit	Lateral (2)
1373	M9PB57;P54350	M9PB57;P54350	Wee1;wee	Wee1-like protein kinase	Lateral (2)
1437	Q0E8S5;M9PCE7;M9PEZ6;M9PCT0	Q0E8S5;M9PCE7;M9PEZ6;M9PCT0			Lateral (2)
1467	M9PFQ1;M9PD06;M9PG46;M9PFZ0	M9PFQ1;M9PD06;M9PG46;M9PFZ0	Usp32	Ubiquitin carboxyl-terminal hydrolase	Lateral (2)
1481	M9PD65	M9PD65	RanGAP		Lateral (2)
1534	M9PES8	M9PES8			Lateral (2)
1577	M9PFS8;Q9VVA0	M9PFS8;Q9VVA0	CG9705	Cold shock domain-containing protein CG9705	Lateral (2)
1638	M9PH73;Q24025	M9PH73;Q24025	sog	Dorsal-ventral patterning protein Sog	Lateral (2)
1723	X2JAB9;O46037	X2JAB9;O46037	Vinc	Vinculin	Lateral (2)
1735	O46098	O46098	bcn92	Protein bcn92	Lateral (2)
5241	Q9VTP4	Q9VTP4	RpL10Ab	60S ribosomal protein L10a-2	Lateral (2)
1983	P29613	P29613	Tpi	Triosephosphate isomerase	Lateral (2)
1732	Q7KW08;O46085	Q7KW08;O46085	Pex5		Lateral (2)
1721	O44434	O44434	qkr58E-3		Lateral (2)
1585	M9PFW0;M9PG13;Q9VVW5	M9PFW0;M9PG13;Q9VVW5	Mkp3	Dual specificity protein phosphatase;Dual specificity protein phosphatase Mpk3	Lateral (2)
1570	M9PFL6;P18537	M9PFL6;P18537	fz	Frizzled	Lateral (2)
1517	M9PEA6;O76927	M9PEA6;O76927	RpS21	40S ribosomal protein S21	Lateral (2)
1470	Q9VK62;M9PD12	Q9VK62;M9PD12	spict		Lateral (2)
1458	M9PCQ8;Q9XTN2	M9PCQ8;Q9XTN2	chico	Insulin receptor substrate 1	Lateral (2)
1377	M9PB86;P23645	M9PB86;P23645	bib	Neurogenic protein big brain	Lateral (2)
1322	M9NE68;P02516	M9NE68;P02516	Hsp23	Heat shock protein 23	Lateral (2)
1251	M9MSK4;M9MRQ6;Q9NFP5;M9MRR7	M9MSK4;M9MRQ6;Q9NFP5;M9MRR7	Sh3beta	SH3 domain-binding glutamic acid-rich protein homolog	Lateral (2)
1171	E2QCN9	E2QCN9	Gs1l		Lateral (2)
1157	E1JJN1;P35128;Q9VJS5	E1JJN1;P35128	ben	Ubiquitin-conjugating enzyme E2 N	Lateral (2)
1076	E1JGZ3	E1JGZ3			Lateral (2)
1040	D0IQK3;Q961Q7	D0IQK3;Q961Q7	AMPdeam-RJ;AMPdeam		Lateral (2)
967	Q9VI18;B9A0M7	Q9VI18;B9A0M7	BcDNA:LD21969		Lateral (2)
895	B6VQ99;M9PFW2	B6VQ99;M9PFW2	Neu2		Lateral (2)
813	A8DYU2;A8DYU1;A8DYU3;R9PY62;R9PY34;M9NE71	A8DYU2;A8DYU1;A8DYU3;R9PY62;R9PY34			Lateral (2)
805	A8DYB0	A8DYB0			Lateral (2)
751	A4V134;A4V133;L0MNA2	A4V134;A4V133;L0MNA2	CaMKII		Lateral (2)
639	A1Z9D7	A1Z9D7	arr		Lateral (2)
551	A1Z6Q0;A4UZ58	A1Z6Q0;A4UZ58	koi		Lateral (2)
419	Q9W1D9;A0A0B4LGH8	Q9W1D9;A0A0B4LGH8		Oxysterol-binding protein	Lateral (2)
361	A0A0B4LF92;A1Z9A2	A0A0B4LF92;A1Z9A2	CG4646	UPF0587 protein CG4646	Lateral (2)
358	A0A0B4LF57;P62152	A0A0B4LF57;P62152	Cam	Calmodulin	Lateral (2)
2555	Q7K0S1;H0RN96	Q7K0S1			Lateral (2)
307	A0A0B4KHS3;Q8IN63	A0A0B4KHS3;Q8IN63	mira		Lateral (2)
3598	Q9V6U8	Q9V6U8	Uba3	Nedd8-activating enzyme E1 catalytic subunit	Lateral (2)
2676	Q7K738	Q7K738	Ubc10		Lateral (2)
3801	Q9VBY5	Q9VBY5			Lateral (2)
3469	Q9V3D9	Q9V3D9	Srp54k		Lateral (2)
2758	Q7KT70	Q7KT70	Gli		Lateral (2)
2764	Q7KTG0	Q7KTG0			Lateral (2)
2780	Q7KTU3	Q7KTU3	CG7369-RA		Lateral (2)
3404	Q9I7W2	Q9I7W2			Lateral (2)
2847	Q7YU16;Q9VZN0	Q7YU16;Q9VZN0			Lateral (2)
2857	Q86B47;X2JKW3	Q86B47;X2JKW3	CG8611	Probable ATP-dependent RNA helicase CG8611	Lateral (2)
3342	Q960C5;X2JA56;Q9VJE6	Q960C5;X2JA56;Q9VJE6	Lrch		Lateral (2)
2905	Q9V9R4;Q8IMF4;Q2PDP3;Q8IMF3	Q9V9R4;Q8IMF4;Q2PDP3;Q8IMF3	CG2201-RB		Lateral (2)
3337	Q95U34	Q95U34	Galk		Lateral (2)
3312	Q95RX5	Q95RX5			Lateral (2)
3300	Q95RP1	Q95RP1	CG3426		Lateral (2)
3187	Q8SY58	Q8SY58			Lateral (2)
2969	Q8IPB1	Q8IPB1	dUTPase		Lateral (2)
3013	Q8IQM5	Q8IQM5			Lateral (2)
3100	Q8MSC4	Q8MSC4	BigH1		Lateral (2)
3130	Q8ST61	Q8ST61	Nf-YB		Lateral (2)
3169	Q8SXP8;Q9W1I0	Q8SXP8;Q9W1I0	TBPH		Lateral (2)
3805	Q9VBY9	Q9VBY9			Lateral (2)
4719	Q9VM95	Q9VM95	Aatf	Protein Aatf	Lateral (2)
3784	Q9VBU2	Q9VBU2	RIOK2		Lateral (2)
2239	Q24145	Q24145	shark	Tyrosine-protein kinase shark	Lateral (2)
3803	Q9VBY7	Q9VBY7	veli		Lateral (2)
1422	Q9VQ08;M9PC46	Q9VQ08;M9PC46	robo2		Lateral (2)
464	A0A0B4LHI3;Q9XZL8	A0A0B4LHI3;Q9XZL8	sra	Protein sarah	Ventral Tl10B (3)
5979	Q9W266	Q9W266	wdp		Ventral Tl10B (3)
5975	Q9W254	Q9W254	qkr58E-2		Ventral Tl10B (3)
468	A0A0B4LHQ9	A0A0B4LHQ9	pre-mod(mdg4)-E		Ventral Tl10B (3)
1276	M9MSJ7;M9PGW2;Q9W081	M9MSJ7			Ventral Tl10B (3)
1342	M9NF18;Q9VYW5;M9NED4	M9NF18;Q9VYW5;M9NED4			Ventral Tl10B (3)
1387	Q8INW0;M9PBE2;Q9VIT1;Q8INV9	Q8INW0;M9PBE2;Q9VIT1;Q8INV9	Hakai		Ventral Tl10B (3)
1803	O96539	O96539	Ate1	Arginyl-tRNA--protein transferase 1	Ventral Tl10B (3)
2146	Q05856	Q05856	SmB	Small nuclear ribonucleoprotein-associated protein B	Ventral Tl10B (3)
2509	Q7JXV9	Q7JXV9	Vps25	Vacuolar protein-sorting-associated protein 25	Ventral Tl10B (3)
2520	Q7JYZ0	Q7JYZ0			Ventral Tl10B (3)
2673	Q7K5M2;A0A0B4LFE1	Q7K5M2;A0A0B4LFE1			Ventral Tl10B (3)
3548	Q9V451	Q9V451	Mst85C		Ventral Tl10B (3)
3755	Q9VBC6	Q9VBC6			Ventral Tl10B (3)
4031	Q9VEH2	Q9VEH2			Ventral Tl10B (3)
4127	Q9VFP5	Q9VFP5			Ventral Tl10B (3)
4284	Q9VHG5;A0A0B4LGV6	Q9VHG5;A0A0B4LGV6	Ibf1		Ventral Tl10B (3)
4538	Q9VKC1	Q9VKC1	RpL7-like		Ventral Tl10B (3)
5049	Q9VR90	Q9VR90	Syx16		Ventral Tl10B (3)
5301	Q9VUC4	Q9VUC4	CG13484-RA		Ventral Tl10B (3)
5336	Q9VUV8	Q9VUV8			Ventral Tl10B (3)
5432	Q9VVX6	Q9VVX6	Bet1		Ventral Tl10B (3)
5607	Q9VXQ6	Q9VXQ6			Ventral Tl10B (3)
5834	X2JG46;Q9W0D2	X2JG46;Q9W0D2			Ventral Tl10B (3)
6042	Q9W335	Q9W335	l(1)G0320		Ventral Tl10B (3)
6045	Q9W351	Q9W351	CG16892-RA		Ventral Tl10B (3)
6054	Q9W380	Q9W380			Ventral Tl10B (3)
6064	Q9W3B2	Q9W3B2	Rbm13		Ventral Tl10B (3)
6077	Q9W3D5	Q9W3D5			Ventral Tl10B (3)
6082	Q9W3F7	Q9W3F7	CG12125-RB		Ventral Tl10B (3)
6084	Q9W3G1	Q9W3G1			Ventral Tl10B (3)
6091	Q9W3J6	Q9W3J6	CG17982-RA		Ventral Tl10B (3)
6098	Q9W3M4	Q9W3M4	l(1)G0193		Ventral Tl10B (3)
6120	Q9W3T9	Q9W3T9			Ventral Tl10B (3)
6123	Q9W3U9;X2JAQ5	Q9W3U9;X2JAQ5			Ventral Tl10B (3)
6127	Q9W3V8	Q9W3V8	CG4542	Probable dolichyl pyrophosphate Glc1Man9GlcNAc2 alpha-1,3-glucosyltransferase	Ventral Tl10B (3)
6141	Q9W3Y6;Q8IRQ6	Q9W3Y6;Q8IRQ6	APC7		Ventral Tl10B (3)
6170	Q9W486;X2JIH1;F3YD98	Q9W486;X2JIH1;F3YD98	CG32758-RA		Ventral Tl10B (3)
6178	X2JCL3;Q9W4D1	X2JCL3;Q9W4D1			Ventral Tl10B (3)
6190	Q9W4J6	Q9W4J6			Ventral Tl10B (3)
6194	Q9W4K8	Q9W4K8	CG3626-RA		Ventral Tl10B (3)
6202	Q9W4N6	Q9W4N6			Ventral Tl10B (3)
6203	Q9W4N8;Q7KVX5	Q9W4N8;Q7KVX5	Vap-33A		Ventral Tl10B (3)
6215	Q9W4W8	Q9W4W8			Ventral Tl10B (3)
6230	Q9W531	Q9W531	EG:22E5.7		Ventral Tl10B (3)
6253	Q9W5G1;X2JDN0;X2J9Y4	Q9W5G1;X2JDN0;X2J9Y4	ebo		Ventral Tl10B (3)
6319	Q9Y112;Q9VZK8	Q9Y112	BcDNA.GH10614		Ventral Tl10B (3)
6329	Q9Y140	Q9Y140	CG7601	Dehydrogenase/reductase SDR family protein 7-like	Ventral Tl10B (3)
6338	Q9Y171	Q9Y171	BcDNA.GH02220		Ventral Tl10B (3)
6537	X2JB48;Q26365	X2JB48;Q26365	sesB	ADP,ATP carrier protein	Ventral Tl10B (3)
5955	Q9W1X4	Q9W1X4	Nup214	Nuclear pore complex protein Nup214	Ventral Tl10B (3)
5981	Q9W281	Q9W281			Ventral Tl10B (3)
6029	Q9W2V7	Q9W2V7	Psf3		Ventral Tl10B (3)
5949	Q9W1S1	Q9W1S1	CG3502-RB		Ventral Tl10B (3)
5929	Q9W1H5	Q9W1H5	DCP1		Ventral Tl10B (3)
5902	Q9W158	Q9W158			Ventral Tl10B (3)
5901	Q9W149	Q9W149	CG11414-RA		Ventral Tl10B (3)
5869	Q9W0R0	Q9W0R0	Cdc5		Ventral Tl10B (3)
5806	Q9W020	Q9W020	CG9004	Nucleolar MIF4G domain-containing protein 1 homolog	Ventral Tl10B (3)
5793	Q9VZW0	Q9VZW0	Sk2		Ventral Tl10B (3)
5762	Q9VZF5	Q9VZF5	pav	Kinesin-like protein	Ventral Tl10B (3)
5736	X2JJD6;Q9VZ49	X2JJD6;Q9VZ49	CG2145	Poly(U)-specific endoribonuclease homolog	Ventral Tl10B (3)
5712	Q9VYW4	Q9VYW4			Ventral Tl10B (3)
5695	Q9VYQ9	Q9VYQ9	Tango4		Ventral Tl10B (3)
5669	Q9VYE9;M9PHQ4;X2JF51	Q9VYE9	CG1622-RA		Ventral Tl10B (3)
5637	Q9VXZ8	Q9VXZ8	pdgy		Ventral Tl10B (3)
5630	Q9VXW9;Q8IR40	Q9VXW9;Q8IR40			Ventral Tl10B (3)
5623	Q9VXV3	Q9VXV3	shtd		Ventral Tl10B (3)
5613	Q9VXR9	Q9VXR9			Ventral Tl10B (3)
5605	Q9VXQ3	Q9VXQ3			Ventral Tl10B (3)
5597	Q9VXN2	Q9VXN2	sun		Ventral Tl10B (3)
5594	X2JC54;Q9VXM5	X2JC54;Q9VXM5	tay		Ventral Tl10B (3)
5567	X2JC86;Q9VXD9	X2JC86;Q9VXD9	mthl1	Probable G-protein coupled receptor Mth-like 1	Ventral Tl10B (3)
5526	Q9VWY6	Q9VWY6	Taf8	Transcription initiation factor TFIID subunit 8	Ventral Tl10B (3)
5509	Q9VWQ2	Q9VWQ2	Pk17E		Ventral Tl10B (3)
5496	Q9VWK5	Q9VWK5	Ulp1		Ventral Tl10B (3)
5484	Q9VWG1;Q8IQW5;M9NHC5	Q9VWG1;Q8IQW5;M9NHC5	HspB8		Ventral Tl10B (3)
5483	Q9VWG0	Q9VWG0	Shawn		Ventral Tl10B (3)
5481	Q9VWF5;M9PI14	Q9VWF5;M9PI14	NAA20		Ventral Tl10B (3)
5474	Q9VWE0	Q9VWE0	dome	Cytokine receptor	Ventral Tl10B (3)
5473	Q9VWD9	Q9VWD9	Ubqn		Ventral Tl10B (3)
5467	Q9VWC6;X2BZL0;M9NES1	Q9VWC6;X2BZL0;M9NES1	vfl		Ventral Tl10B (3)
5456	Q9VW70	Q9VW70	CG7668-RA		Ventral Tl10B (3)
5441	Q9VW35	Q9VW35	Trpml		Ventral Tl10B (3)
5440	Q9VW22	Q9VW22	l(3)76BDm		Ventral Tl10B (3)
5419	Q9VVU2	Q9VVU2	RpL26		Ventral Tl10B (3)
5405	Q9VVN2	Q9VVN2	mRpS26	Probable 28S ribosomal protein S26, mitochondrial	Ventral Tl10B (3)
5386	Q9VVG9	Q9VVG9			Ventral Tl10B (3)
5373	Q9VVB4	Q9VVB4	CG9951	Coiled-coil domain-containing protein 22 homolog	Ventral Tl10B (3)
5363	Q9VV79	Q9VV79	spd-2		Ventral Tl10B (3)
5348	Q9VUZ8	Q9VUZ8	PDCD-5		Ventral Tl10B (3)
5287	Q9VU76;M9PFE5;M9PFI2;Q961X4	Q9VU76;M9PFE5;M9PFI2;Q961X4	cmb		Ventral Tl10B (3)
5281	Q9VU45	Q9VU45	Syx13		Ventral Tl10B (3)
5261	Q9VTY5	Q9VTY5			Ventral Tl10B (3)
5257	Q9VTW6	Q9VTW6			Ventral Tl10B (3)
5205	Q9VT61	Q9VT61			Ventral Tl10B (3)
5199	Q9VT38	Q9VT38			Ventral Tl10B (3)
5190	Q9VSZ6	Q9VSZ6	CG3434	Queuine tRNA-ribosyltransferase subunit QTRTD1 homolog	Ventral Tl10B (3)
5184	Q9VSY8	Q9VSY8	Bet3		Ventral Tl10B (3)
5179	Q9VSW5;M9PF35	Q9VSW5;M9PF35	Klp67A	Kinesin-like protein	Ventral Tl10B (3)
5175	Q9VSU2;E1JI93	Q9VSU2;E1JI93	Tequila		Ventral Tl10B (3)
5127	Q9VS97	Q9VS97	PGRP-SD	Peptidoglycan-recognition protein SD	Ventral Tl10B (3)
5118	Q9VS50	Q9VS50	eco	N-acetyltransferase eco	Ventral Tl10B (3)
5117	Q9VS47	Q9VS47			Ventral Tl10B (3)
5114	Q9VS38	Q9VS38	MED4	Mediator of RNA polymerase II transcription subunit 4	Ventral Tl10B (3)
5053	Q9VRA0	Q9VRA0			Ventral Tl10B (3)
5044	X2JEN2;Q9VR59;X2JCY0;X2JG41;X2JGE9;X2JLN4	X2JEN2;Q9VR59;X2JCY0;X2JG41;X2JGE9;X2JLN4	l(1)G0196	Inositol hexakisphosphate and diphosphoinositol-pentakisphosphate kinase	Ventral Tl10B (3)
5043	Q9VR57;Q8IQ25	Q9VR57;Q8IQ25			Ventral Tl10B (3)
5010	Q9VQT5	Q9VQT5			Ventral Tl10B (3)
4983	Q9VQG4	Q9VQG4	colt	Congested-like trachea protein	Ventral Tl10B (3)
4917	Q9VPM1	Q9VPM1	CG3645-RB		Ventral Tl10B (3)
4915	Q9VPL5	Q9VPL5	Tbc1d15-17		Ventral Tl10B (3)
4902	Q9VPF9	Q9VPF9			Ventral Tl10B (3)
4874	Q9VP52;Q9VP51	Q9VP52;Q9VP51			Ventral Tl10B (3)
4847	Q9VNR9;M9PDB7	Q9VNR9			Ventral Tl10B (3)
4833	Q9VNH6	Q9VNH6	sec8	Exocyst complex component 4	Ventral Tl10B (3)
4828	Q9VNG1	Q9VNG1	CG2182	Gametogenetin-binding protein 2-like	Ventral Tl10B (3)
4822	Q9VNF5	Q9VNF5		3-oxoacyl-[acyl-carrier-protein] synthase	Ventral Tl10B (3)
4797	Q9VN60	Q9VN60	Hus1-like		Ventral Tl10B (3)
4795	Q9VN50	Q9VN50	eIF3-S5-1	Eukaryotic translation initiation factor 3 subunit F-1	Ventral Tl10B (3)
4791	Q9VN31	Q9VN31	Fip1		Ventral Tl10B (3)
4776	Q9VMX3	Q9VMX3			Ventral Tl10B (3)
4766	Q9VMU2	Q9VMU2			Ventral Tl10B (3)
4763	Q9VMS2;M9NES4;A8DYV5	Q9VMS2;M9NES4;A8DYV5	Ncoa6		Ventral Tl10B (3)
4727	Q9VMC6	Q9VMC6			Ventral Tl10B (3)
4703	Q9VM22	Q9VM22			Ventral Tl10B (3)
4696	Q9VLX2	Q9VLX2			Ventral Tl10B (3)
4695	Q9VLW9	Q9VLW9	Herp		Ventral Tl10B (3)
4678	Q9VLS3;M9PB69;M9MRE5;M9PF50;Q0E8L0;E1JHB4;A0A0S0WGQ9;M9PCC7;Q8IPG4;M9PCW8;M9MSG8	Q9VLS3;M9PB69;M9MRE5;M9PF50;Q0E8L0;E1JHB4;A0A0S0WGQ9;M9PCC7;Q8IPG4;M9PCW8;M9MSG8	Piezo	Piezo-type mechanosensitive ion channel component	Ventral Tl10B (3)
4632	Q9VL72	Q9VL72	Etl1	SWI/SNF-related matrix-associated actin-dependent regulator of chromatin subfamily A containing DEAD/H box 1 homolog	Ventral Tl10B (3)
4580	Q9VKQ9	Q9VKQ9	Dpy-30L1	Protein dpy-30 homolog	Ventral Tl10B (3)
4543	Q9VKC9	Q9VKC9	dmGlut		Ventral Tl10B (3)
4537	Q9VKB9	Q9VKB9	rab3-GAP	Rab3 GTPase-activating protein regulatory subunit	Ventral Tl10B (3)
4536	Q9VKB4	Q9VKB4	CG6712	Probable ribosome production factor 1	Ventral Tl10B (3)
4526	Q9VK59	Q9VK59			Ventral Tl10B (3)
4525	Q9VK58	Q9VK58	Pih1D1		Ventral Tl10B (3)
4519	Q9VK43	Q9VK43	A16		Ventral Tl10B (3)
4489	Q9VJQ4	Q9VJQ4	l(2)35Bd	mRNA cap guanine-N7 methyltransferase	Ventral Tl10B (3)
4486	Q9VJL6	Q9VJL6	GMF		Ventral Tl10B (3)
4482	Q9VJJ1	Q9VJJ1			Ventral Tl10B (3)
4471	Q9VJD7	Q9VJD7	SPH93		Ventral Tl10B (3)
4469	Q9VJD1	Q9VJD1	GCS2beta		Ventral Tl10B (3)
4452	Q9VJ57	Q9VJ57	Grip71		Ventral Tl10B (3)
4451	Q9VJ45	Q9VJ45	BEST:LD25345		Ventral Tl10B (3)
4433	Q9VJ08	Q9VJ08			Ventral Tl10B (3)
4405	Q9VIQ5	Q9VIQ5			Ventral Tl10B (3)
4401	Q9VIP4	Q9VIP4	neb	Kinesin-like protein	Ventral Tl10B (3)
4400	Q9VIP2	Q9VIP2			Ventral Tl10B (3)
4393	Q9VIL2	Q9VIL2			Ventral Tl10B (3)
4367	Q9VID4;Q8INT6	Q9VID4;Q8INT6	Mio		Ventral Tl10B (3)
4366	Q9VID1	Q9VID1	Tsp39D	Tetraspanin	Ventral Tl10B (3)
4350	Q9VI53	Q9VI53			Ventral Tl10B (3)
4347	Q9VI15	Q9VI15			Ventral Tl10B (3)
4339	Q9VHX2	Q9VHX2			Ventral Tl10B (3)
4331	Q9VHV6;A0A0B4LGT9	Q9VHV6;A0A0B4LGT9			Ventral Tl10B (3)
4300	Q9VHJ7	Q9VHJ7			Ventral Tl10B (3)
4294	Q9VHI7	Q9VHI7			Ventral Tl10B (3)
4243	Q9VH38	Q9VH38	mtTFB2	Dimethyladenosine transferase 2, mitochondrial	Ventral Tl10B (3)
4228	Q9VGZ1	Q9VGZ1	CG6345	CDK5RAP1-like protein	Ventral Tl10B (3)
4226	Q9VGY5	Q9VGY5	CG14683	Probable methyltransferase-like protein 15 homolog	Ventral Tl10B (3)
4215	Q9VGS9	Q9VGS9	Ugt35a		Ventral Tl10B (3)
4210	Q9VGQ8	Q9VGQ8	Arfip		Ventral Tl10B (3)
4201	Q9VGN8	Q9VGN8			Ventral Tl10B (3)
4199	Q9VGM4	Q9VGM4			Ventral Tl10B (3)
4189	Q9VGG5	Q9VGG5	Cad87A	Cadherin-87A	Ventral Tl10B (3)
4188	Q9VGF9	Q9VGF9	aurA		Ventral Tl10B (3)
4165	Q9VG79	Q9VG79	Dip-C		Ventral Tl10B (3)
4146	Q9VG01	Q9VG01			Ventral Tl10B (3)
4109	Q9VFE6	Q9VFE6	CG3817	RRP15-like protein	Ventral Tl10B (3)
4095	Q9VF91	Q9VF91	CG6236-RA		Ventral Tl10B (3)
4068	Q9VEZ5	Q9VEZ5	ird5	Inhibitor of nuclear factor kappa-B kinase subunit beta	Ventral Tl10B (3)
4063	Q9VEX5	Q9VEX5	Asun	Protein asunder	Ventral Tl10B (3)
4017	Q9VEC1	Q9VEC1	MED17	Mediator of RNA polymerase II transcription subunit 17	Ventral Tl10B (3)
4010	Q9VEA9	Q9VEA9			Ventral Tl10B (3)
3998	Q9VE73	Q9VE73			Ventral Tl10B (3)
3991	Q9VE50	Q9VE50	Gos28	Golgi SNAP receptor complex member 1	Ventral Tl10B (3)
3989	Q9VE17	Q9VE17	snRNP-U1-C	U1 small nuclear ribonucleoprotein C	Ventral Tl10B (3)
3978	Q9VDY6	Q9VDY6			Ventral Tl10B (3)
3969	Q9VDT4	Q9VDT4			Ventral Tl10B (3)
3967	Q9VDS9;Q7KSB7	Q9VDS9;Q7KSB7	Pk92B		Ventral Tl10B (3)
3957	Q9VDP8	Q9VDP8	mdlc		Ventral Tl10B (3)
3947	Q9VDI5;Q0KI39	Q9VDI5			Ventral Tl10B (3)
3933	Q9VDD7	Q9VDD7	meigo	Solute carrier family 35 member B1 homolog	Ventral Tl10B (3)
3924	Q9VDA0	Q9VDA0	Fancm		Ventral Tl10B (3)
3899	Q9VCX3	Q9VCX3	mRpL45	Probable 39S ribosomal protein L45, mitochondrial	Ventral Tl10B (3)
3885	Q9VCT9	Q9VCT9	Usp12-46		Ventral Tl10B (3)
3861	Q9VCG0	Q9VCG0			Ventral Tl10B (3)
3850	Q9VCD3	Q9VCD3			Ventral Tl10B (3)
3837	Q9VC96	Q9VC96	BRWD3		Ventral Tl10B (3)
3834	Q9VC87	Q9VC87			Ventral Tl10B (3)
3812	Q9VC07	Q9VC07	Trf4-2		Ventral Tl10B (3)
3799	Q9VBX8	Q9VBX8			Ventral Tl10B (3)
3795	Q9VBX2	Q9VBX2	Mocs2	Molybdopterin synthase catalytic subunit	Ventral Tl10B (3)
3763	Q9VBI1	Q9VBI1	Sld5	DNA replication complex GINS protein SLD5	Ventral Tl10B (3)
3756	Q9VBE5	Q9VBE5	plum		Ventral Tl10B (3)
3735	Q9VB22	Q9VB22	pins		Ventral Tl10B (3)
3732	Q9VB14	Q9VB14	RpS10a	40S ribosomal protein S10a	Ventral Tl10B (3)
3725	Q9VAZ0	Q9VAZ0	CG5003-RA		Ventral Tl10B (3)
3717	Q9VAX9	Q9VAX9	CG4884-RA		Ventral Tl10B (3)
3699	Q9VAP1	Q9VAP1			Ventral Tl10B (3)
3688	Q9VAK5	Q9VAK5	ND-20L		Ventral Tl10B (3)
3672	Q9VAF3	Q9VAF3			Ventral Tl10B (3)
3667	Q9VAC8	Q9VAC8	Sas-6	Spindle assembly abnormal protein 6 homolog	Ventral Tl10B (3)
3659	Q9VA97	Q9VA97			Ventral Tl10B (3)
3656	Q9VA80	Q9VA80			Ventral Tl10B (3)
3652	Q9VA42	Q9VA42	Npc2g		Ventral Tl10B (3)
3647	Q9VA00	Q9VA00	zwilch	Protein zwilch	Ventral Tl10B (3)
3616	Q9V9A8	Q9V9A8	phtf	Putative homeodomain transcription factor	Ventral Tl10B (3)
3599	Q9V6Y3	Q9V6Y3	mRpS16	Probable 28S ribosomal protein S16, mitochondrial	Ventral Tl10B (3)
3583	Q9V564	Q9V564	CG1968	Conserved oligomeric Golgi complex subunit 6	Ventral Tl10B (3)
3572	Q9V4F4	Q9V4F4	myo		Ventral Tl10B (3)
3529	Q9V400;E3CTS5	Q9V400	Ilk		Ventral Tl10B (3)
3513	Q9V3V7	Q9V3V7	Spc25	Kinetochore protein Spc25	Ventral Tl10B (3)
3502	Q9V3S7	Q9V3S7	BcDNA.GH12326		Ventral Tl10B (3)
3496	Q9V3P2	Q9V3P2	l(2)34Fd		Ventral Tl10B (3)
3458	Q9V3B6;REV__Q9VNZ4	Q9V3B6	c12.1	Protein CWC15 homolog	Ventral Tl10B (3)
3424	Q9NIV1;A0A0B4KGJ5;A0A0B4KG56	Q9NIV1;A0A0B4KGJ5;A0A0B4KG56	PEK	Eukaryotic translation initiation factor 2-alpha kinase	Ventral Tl10B (3)
3409	Q9N2M8;A0A0B4KI61;Q8IMI6	Q9N2M8;A0A0B4KI61	hdc	Headcase protein;Headcase short protein	Ventral Tl10B (3)
3379	Q9GQQ0	Q9GQQ0	spin	Protein spinster	Ventral Tl10B (3)
3377	X2JFC3;Q9GQN0;M9MSN9;M9MS57;M9MSD3;M9MSB0	X2JFC3;Q9GQN0;M9MSN9;M9MS57;M9MSD3;M9MSB0	Ranbp16	Ran-binding protein 16	Ventral Tl10B (3)
3365	Q961D9	Q961D9	lgs	Protein BCL9 homolog	Ventral Tl10B (3)
3352	Q960V3	Q960V3	milt	Trafficking kinesin-binding protein milt	Ventral Tl10B (3)
3346	Q960J7	Q960J7			Ventral Tl10B (3)
3267	Q94513	Q94513	BEAF-32		Ventral Tl10B (3)
3252	Q8T4C9	Q8T4C9			Ventral Tl10B (3)
3224	Q8T051	Q8T051			Ventral Tl10B (3)
3207	Q8SZ16	Q8SZ16	Sdhaf3	Succinate dehydrogenase assembly factor 3, mitochondrial	Ventral Tl10B (3)
3206	Q8SZ15	Q8SZ15			Ventral Tl10B (3)
3184	Q8SY33	Q8SY33	gw	Protein Gawky	Ventral Tl10B (3)
3158	Q8SX89	Q8SX89	kuk		Ventral Tl10B (3)
3149	Q8SX37	Q8SX37	Pis		Ventral Tl10B (3)
3142	Q8SWW9	Q8SWW9	EG:171D11.2		Ventral Tl10B (3)
3125	Q8MYW9;D3DMP4;A0A0B4LGV0	Q8MYW9;D3DMP4;A0A0B4LGV0	CG8112-RA	O-acyltransferase	Ventral Tl10B (3)
3121	X2JEA3;Q8MV48	X2JEA3;Q8MV48	GalNAc-T2	Polypeptide N-acetylgalactosaminyltransferase;N-acetylgalactosaminyltransferase 7	Ventral Tl10B (3)
3114	Q8MT06	Q8MT06	Ns1	Guanine nucleotide-binding protein-like 3 homolog	Ventral Tl10B (3)
3106	Q8MSS7	Q8MSS7	mRpS2		Ventral Tl10B (3)
3104	Q8MSQ4;Q9VE37	Q8MSQ4;Q9VE37	Mekk1		Ventral Tl10B (3)
3090	Q8MRI4	Q8MRI4			Ventral Tl10B (3)
3087	Q8MR45	Q8MR45	CG1827	Putative N(4)-(beta-N-acetylglucosaminyl)-L-asparaginase CG1827;Glycosylasparaginase alpha chain;Glycosylasparaginase beta chain	Ventral Tl10B (3)
3070	Q8MLV1	Q8MLV1	LBR	Lamin-B receptor	Ventral Tl10B (3)
3060	Q8MKN0	Q8MKN0	Coq9	Ubiquinone biosynthesis protein COQ9, mitochondrial	Ventral Tl10B (3)
3028	Q8IR72	Q8IR72	CG32638-RB		Ventral Tl10B (3)
3027	Q8IR64	Q8IR64			Ventral Tl10B (3)
2995	Q8IQ70	Q8IQ70			Ventral Tl10B (3)
2986	Q8IPU7;Q8IPU8;Q9VPD6	Q8IPU7;Q8IPU8;Q9VPD6			Ventral Tl10B (3)
2966	Q8IPA1;Q8IP99	Q8IPA1;Q8IP99	Ada1-2;Ada1-1		Ventral Tl10B (3)
2957	Q8IP11	Q8IP11			Ventral Tl10B (3)
2954	Q8INX3	Q8INX3	CG10336	Protein TIPIN homolog	Ventral Tl10B (3)
2952	Q8INU6	Q8INU6	CG31674-RA		Ventral Tl10B (3)
2950	Q8INL3	Q8INL3			Ventral Tl10B (3)
2946	Q8INH7	Q8INH7	timeout		Ventral Tl10B (3)
2879	Q86CW5	Q86CW5	Hmr		Ventral Tl10B (3)
2875	Q9XZ25;Q86BR7	Q9XZ25;Q86BR7			Ventral Tl10B (3)
2873	Q86BP7;Q9VZU3	Q86BP7;Q9VZU3	pfk		Ventral Tl10B (3)
2853	Q7YZH1	Q7YZH1	rno	PHD finger protein rhinoceros	Ventral Tl10B (3)
2821	Q9W4C4;Q7KVW1	Q9W4C4;Q7KVW1	spoon		Ventral Tl10B (3)
2809	Q7KVB0	Q7KVB0	CG33230-RA		Ventral Tl10B (3)
2804	Q9VZV3;Q7KV83;Q95RR8;Q9I7T8;A8JNJ2;Q8IRE7	Q9VZV3;Q7KV83;Q95RR8;Q9I7T8;A8JNJ2;Q8IRE7	PAN3;CG11486-RK;CG11486;CG11486-RB	PAB-dependent poly(A)-specific ribonuclease subunit PAN3	Ventral Tl10B (3)
2754	Q7KSV7;Q95T08	Q7KSV7;Q95T08			Ventral Tl10B (3)
2735	Q7KRS9;Q8IMG3	Q7KRS9;Q8IMG3			Ventral Tl10B (3)
2730	Q7KQM6;REV__A0A0B4KG49	Q7KQM6	CG11148	PERQ amino acid-rich with GYF domain-containing protein CG11148	Ventral Tl10B (3)
2650	Q7K4M4	Q7K4M4	tef	Protein teflon	Ventral Tl10B (3)
2648	Q7K4L8	Q7K4L8			Ventral Tl10B (3)
2646	Q7K4I5	Q7K4I5	CG8892-RB	UBX domain-containing protein 7	Ventral Tl10B (3)
2613	Q7K2S9	Q7K2S9	loopin-1		Ventral Tl10B (3)
2608	Q7K2L1	Q7K2L1	lat		Ventral Tl10B (3)
2590	Q7K1W4	Q7K1W4	Jheh3		Ventral Tl10B (3)
2579	Q7K1H0	Q7K1H0	CG6491		Ventral Tl10B (3)
2566	Q7K126	Q7K126	Not3		Ventral Tl10B (3)
2551	Q7K0L7	Q7K0L7	Tpc1		Ventral Tl10B (3)
2546	Q7K0E3;A0A0B4K6X9	Q7K0E3;A0A0B4K6X9	Mob4	MOB kinase activator-like 4	Ventral Tl10B (3)
2542	Q7K0A0	Q7K0A0	mRpL42		Ventral Tl10B (3)
2538	Q7K010	Q7K010	Tsp42Ef	Tetraspanin	Ventral Tl10B (3)
2499	Q7JX95	Q7JX95			Ventral Tl10B (3)
2477	Q7JW27	Q7JW27	wash	WAS protein family homolog 1	Ventral Tl10B (3)
2454	Q7JUX9	Q7JUX9	trmt10c	Mitochondrial ribonuclease P protein 1 homolog	Ventral Tl10B (3)
2446	Q7JRM5	Q7JRM5			Ventral Tl10B (3)
2433	Q7JR99	Q7JR99	CG30094-RA		Ventral Tl10B (3)
2416	Q7JMV3;A4V110;Q0KIF7	Q7JMV3;A4V110;Q0KIF7	CaMKI		Ventral Tl10B (3)
2370	Q5U0V7	Q5U0V7	Synj		Ventral Tl10B (3)
2352	Q59E01;Q8IPM6;Q86BB1;Q95RI8	Q59E01;Q8IPM6;Q86BB1;Q95RI8	CG9795-RD		Ventral Tl10B (3)
2348	Q540Z9;Q9XZT6	Q540Z9;Q9XZT6	dnk	Deoxynucleoside kinase	Ventral Tl10B (3)
2337	Q4V619	Q4V619			Ventral Tl10B (3)
2333	Q4V5H0;Q9VCD4	Q4V5H0;Q9VCD4			Ventral Tl10B (3)
2329	Q4V3Z5	Q4V3Z5			Ventral Tl10B (3)
2309	Q2PDX2;M9PF23	Q2PDX2;M9PF23			Ventral Tl10B (3)
2308	Q2PDW6;Q9VR58;M9PI43	Q2PDW6;Q9VR58;M9PI43	Cp110		Ventral Tl10B (3)
2307	Q2PDU0	Q2PDU0	NimB3		Ventral Tl10B (3)
2299	Q29QQ9	Q29QQ9	Rrp42		Ventral Tl10B (3)
2295	Q27869;A0A0B4KGK0	Q27869;A0A0B4KGK0	Pcmt	Protein-L-isoaspartate(D-aspartate) O-methyltransferase;Protein-L-isoaspartate O-methyltransferase	Ventral Tl10B (3)
2291	Q27333	Q27333	l(2)not	Lethal(2)neighbour of tid protein	Ventral Tl10B (3)
2203	Q0KHU5	Q0KHU5	CG32699	1-acylglycerophosphocholine O-acyltransferase 1	Ventral Tl10B (3)
2177	Q0E8X6;Q9W1Q8	Q0E8X6;Q9W1Q8	eIF2B-delta		Ventral Tl10B (3)
2175	Q9W0Y5;Q0E8W1;Q8MMC6	Q9W0Y5;Q0E8W1;Q8MMC6	CG30427-RB;CG30427-RC		Ventral Tl10B (3)
2169	Q0E8P1;Q9VIX6	Q0E8P1;Q9VIX6			Ventral Tl10B (3)
2155	Q0E8A7;M9NEH9	Q0E8A7;M9NEH9	mub		Ventral Tl10B (3)
2147	Q05913	Q05913	TfIIFalpha	General transcription factor IIF subunit 1	Ventral Tl10B (3)
2135	Q02308	Q02308	H	Protein hairless	Ventral Tl10B (3)
2103	P56175	P56175	Rtc1	Probable RNA 3-terminal phosphate cyclase-like protein	Ventral Tl10B (3)
2060	P49657;X2JFM3;Q9VX06	P49657;X2JFM3;Q9VX06	mnb	Serine/threonine-protein kinase minibrain	Ventral Tl10B (3)
2058	P49028	P49028	mago	Protein mago nashi	Ventral Tl10B (3)
2033	P42570	P42570	plu	DNA replication inhibitor plutonium	Ventral Tl10B (3)
2030	P42283;A0A0B4KEI4;P42284;Q7KQZ4	P42283;A0A0B4KEI4	lola;pre-lola-G	Longitudinals lacking protein, isoform G	Ventral Tl10B (3)
2029	P42207	P42207	37135	Septin-1	Ventral Tl10B (3)
2010	X2JA59;P39770	X2JA59;P39770	salm	Homeotic protein spalt-major	Ventral Tl10B (3)
1955	X2JDI1;P23696	X2JDI1;P23696	mts	Serine/threonine-protein phosphatase;Serine/threonine-protein phosphatase PP2A	Ventral Tl10B (3)
1926	P20193;E1JIJ9	P20193;E1JIJ9	Su(var)3-7	Protein suppressor of variegation 3-7	Ventral Tl10B (3)
1915	P18502	P18502	ptc	Protein patched	Ventral Tl10B (3)
1911	Q7JYK1;P18101	Q7JYK1;P18101	RpL40	Ubiquitin-60S ribosomal protein L40;Ubiquitin;60S ribosomal protein L40	Ventral Tl10B (3)
1907	P17886	P17886	crn	Protein crooked neck	Ventral Tl10B (3)
1882	X2J8F5;P11996	X2J8F5;P11996	Lsp1beta	Larval serum protein 1 beta chain	Ventral Tl10B (3)
1858	P07182	P07182	Cp36	Chorion protein S36	Ventral Tl10B (3)
1854	P06602	P06602	eve	Segmentation protein even-skipped	Ventral Tl10B (3)
1832	Q4AB54;P02255;Q4AB94;Q4ABD8	Q4AB54;P02255;Q4AB94;Q4ABD8	His1:CG33861;His1;His1:CG33834;His1:CG33807	Histone H1	Ventral Tl10B (3)
1825	O97454	O97454	l(1)10Bb		Ventral Tl10B (3)
1790	O77263	O77263	CG4045	tRNA (guanine-N(7)-)-methyltransferase	Ventral Tl10B (3)
1784	X2JG90;O76932	X2JG90;O76932	Pp4-19C	Serine/threonine-protein phosphatase;Serine/threonine-protein phosphatase 4 catalytic subunit	Ventral Tl10B (3)
1771	O76861	O76861	EG:100G10.1		Ventral Tl10B (3)
1740	O46308	O46308	png		Ventral Tl10B (3)
1697	O16130	O16130	RpL39	60S ribosomal protein L39	Ventral Tl10B (3)
1648	M9PHL0;M9PHZ0;M9PI16;Q9VWF2	M9PHL0;M9PHZ0;M9PI16;Q9VWF2	e(y)3	Supporter of activation of yellow protein	Ventral Tl10B (3)
1647	M9PHK2;Q0KHQ5;Q8IQW6;M9NE33;M9PI11	M9PHK2;Q0KHQ5;Q8IQW6	Tao		Ventral Tl10B (3)
1642	Q8T052;M9PHD8;Q07DP5	Q8T052;M9PHD8;Q07DP5	Trf2		Ventral Tl10B (3)
1626	M9PGQ6;P39736	M9PGQ6;P39736	Bx42	Puff-specific protein Bx42	Ventral Tl10B (3)
1594	M9PG50;Q9VP22	M9PG50;Q9VP22	Cdk12	Cyclin-dependent kinase 12	Ventral Tl10B (3)
1584	M9PFV9;P20232;Q9VXS6	M9PFV9;P20232	TfIIS	Transcription elongation factor S-II	Ventral Tl10B (3)
1559	Q9VUW9;M9PFE4	Q9VUW9;M9PFE4	Hip14	Palmitoyltransferase	Ventral Tl10B (3)
1557	M9PFB5;Q94899	M9PFB5;Q94899	alien	COP9 signalosome complex subunit 2	Ventral Tl10B (3)
1547	M9PF14;M9PF20	M9PF14;M9PF20	tral		Ventral Tl10B (3)
1541	M9PEX3;P55965	M9PEX3;P55965	byn	T-related protein	Ventral Tl10B (3)
1535	Q960V1;Q0E8G1;M9PET3;M9PF79	Q960V1;Q0E8G1;M9PET3;M9PF79	simj		Ventral Tl10B (3)
1523	Q7K3K5;M9PEG6	Q7K3K5;M9PEG6	ZnT63C		Ventral Tl10B (3)
1503	M9PDP5;Q9W4R7;M9PGK9	M9PDP5;Q9W4R7;M9PGK9			Ventral Tl10B (3)
1465	M9PD01;O44252	M9PD01;O44252	rost	Protein rolling stone	Ventral Tl10B (3)
1451	M9PCL5;Q9VKX4	M9PCL5;Q9VKX4	mRpS7	28S ribosomal protein S7, mitochondrial	Ventral Tl10B (3)
1425	M9PC85;Q9V3V0	M9PC85;Q9V3V0	x16		Ventral Tl10B (3)
1416	M9PBX0;P42003	M9PBX0;P42003	Mad	Mothers against decapentaplegic homolog;Protein mothers against dpp	Ventral Tl10B (3)
1415	M9PBW0;Q9VSF3	M9PBW0;Q9VSF3	UbcE2M;Ubc12	Nedd8-conjugating enzyme Ubc12	Ventral Tl10B (3)
1365	M9PAY6;M9PDS0;Q9VPM7	M9PAY6;M9PDS0;Q9VPM7	CG17078-RA		Ventral Tl10B (3)
1309	M9PI67;M9NEA3;M9NDR9;Q9VUQ8	M9PI67;M9NEA3;M9NDR9;Q9VUQ8	CG7427	Defective in cullin neddylation protein;DCN1-like protein	Ventral Tl10B (3)
1298	M9NDA6;Q8I7C3;M9NFH3	M9NDA6;Q8I7C3;M9NFH3	Lasp	LIM and SH3 domain protein Lasp	Ventral Tl10B (3)
1248	M9MRL4	M9MRL4			Ventral Tl10B (3)
1206	F6JQA6;O77277	F6JQA6;O77277	Torsin	Torsin-like protein	Ventral Tl10B (3)
1169	E2QCK0;Q961C9;A0A0B4LG59	E2QCK0;Q961C9	Tango11	Transport and Golgi organization protein 11	Ventral Tl10B (3)
1160	E1JJQ3;Q8IQW7;X2JG40;E1JJQ4;Q9XYP7	E1JJQ3;Q8IQW7;X2JG40;E1JJQ4;Q9XYP7	Grip84	Gamma-tubulin complex component 2 homolog	Ventral Tl10B (3)
1143	E1JJ98;P27398	E1JJ98;P27398	sol	Calpain-D	Ventral Tl10B (3)
1126	Q7KSE8;E1JIN6;Q8IN94;A0A0B4KHB1;A0A0B4KGD1	Q7KSE8;E1JIN6;Q8IN94;A0A0B4KHB1;A0A0B4KGD1	osa	Trithorax group protein osa	Ventral Tl10B (3)
1110	E1JI58;Q9VP85	E1JI58;Q9VP85	Sin		Ventral Tl10B (3)
1085	E1JH71;Q7K3B9	E1JH71;Q7K3B9	CG7544	Methyltransferase-like protein;Methyltransferase-like protein 16 homolog	Ventral Tl10B (3)
952	Q86BR6;B7Z0R7;Q95TJ1	Q86BR6;B7Z0R7;Q95TJ1	Atg16		Ventral Tl10B (3)
950	B7Z0N0	B7Z0N0			Ventral Tl10B (3)
944	B7Z0G7;Q9VW97;M9PFR5	B7Z0G7;Q9VW97;M9PFR5	Su(var)3-3	Possible lysine-specific histone demethylase 1	Ventral Tl10B (3)
902	B7YZK4;B7YZK5;A0A0B4KG78;A0A0B4JCT7;B7YZK6	B7YZK4;B7YZK5;A0A0B4KG78;A0A0B4JCT7;B7YZK6	Jabba		Ventral Tl10B (3)
891	B6IDK2;Q9W568	B6IDK2;Q9W568	hfw	Protein halfway	Ventral Tl10B (3)
879	E1JIT0;B3DNL7;O01367;A0A0B4KHV5	E1JIT0;B3DNL7;O01367;A0A0B4KHV5	how	Protein held out wings	Ventral Tl10B (3)
878	B3DN56;P47980	B3DN56;P47980	Tis11	Protein TIS11	Ventral Tl10B (3)
870	A8JV18;Q9VXE6	A8JV18;Q9VXE6	Nup153	Nuclear pore complex protein Nup153	Ventral Tl10B (3)
860	A8JUS8;Q9W5G0	A8JUS8;Q9W5G0			Ventral Tl10B (3)
840	M9PF74;A8JNQ5;A8JNQ4;M9ND74;Q7YU08;Q9VT99;Q9VT98;M9NFQ7	M9PF74;A8JNQ5;A8JNQ4;M9ND74;Q7YU08;Q9VT99;Q9VT98;M9NFQ7	A2bp1		Ventral Tl10B (3)
819	A8DYY5	A8DYY5	CG34183	Putative RNA polymerase II subunit B1 CTD phosphatase RPAP2 homolog	Ventral Tl10B (3)
774	B7Z0R6;A4V3J9;Q0KI03;Q8IML9;A0A0B4K7Z3;A8JRF7;Q86B72;A0A0C4DHG9;P49762	B7Z0R6;A4V3J9;Q0KI03;Q8IML9;A0A0B4K7Z3;A8JRF7;Q86B72;A0A0C4DHG9;P49762	Doa	Serine/threonine-protein kinase Doa	Ventral Tl10B (3)
752	A4V164;H5V8B9;Q9W0V1;A4V166	A4V164;H5V8B9;Q9W0V1;A4V166	Pdk1	3-phosphoinositide-dependent protein kinase 1	Ventral Tl10B (3)
726	A1ZBV5	A1ZBV5	CG18065-RA		Ventral Tl10B (3)
697	A1ZB29	A1ZB29			Ventral Tl10B (3)
646	A1Z9I5	A1Z9I5	tum		Ventral Tl10B (3)
636	A1Z992	A1Z992	AGBE		Ventral Tl10B (3)
625	A1Z8V0;Q9V3H7	A1Z8V0	Sr-CII		Ventral Tl10B (3)
613	A1Z8D4	A1Z8D4	CG18004-RB		Ventral Tl10B (3)
602	A1Z840	A1Z840	cdc2rk		Ventral Tl10B (3)
595	A1Z7Z8	A1Z7Z8	CG30001-RA		Ventral Tl10B (3)
585	E2QCN3;A1Z7Q7	E2QCN3;A1Z7Q7	Hydr1		Ventral Tl10B (3)
577	A1Z7K2	A1Z7K2	CG30349-RA		Ventral Tl10B (3)
574	A1Z7H7	A1Z7H7	CG8586-RA		Ventral Tl10B (3)
562	A1Z743;A1Z745;Q8SXN9	A1Z743;A1Z745;Q8SXN9	CG1383		Ventral Tl10B (3)
549	A1Z6M0	A1Z6M0	Bap170		Ventral Tl10B (3)
542	A1Z6H6	A1Z6H6			Ventral Tl10B (3)
524	A0A126GUW2;Q9VEJ2	A0A126GUW2;Q9VEJ2	l(3)07882	Nucleolar protein 14 homolog	Ventral Tl10B (3)
515	A0A126GUQ3;Q9VNA8	A0A126GUQ3;Q9VNA8	hd	Protein downstream neighbor of son homolog	Ventral Tl10B (3)
480	A0A0B4LIE8;Q9VDL7;Q8IN53	A0A0B4LIE8;Q9VDL7;Q8IN53	att-ORFA		Ventral Tl10B (3)
470	A0A0B4LHS9;Q94547	A0A0B4LHS9;Q94547	Rga	Regulator of gene activity	Ventral Tl10B (3)
455	A0A0B4LHA6;Q9VE61	A0A0B4LHA6;Q9VE61	CG7694	E3 ubiquitin-protein ligase RNF181 homolog	Ventral Tl10B (3)
395	A0A0B4LFY0	A0A0B4LFY0	thr		Ventral Tl10B (3)
390	A0A0B4LFU9	A0A0B4LFU9	ana2		Ventral Tl10B (3)
367	A8DYD3;A1Z9M3;B7YZE6;A0A0B4LFC7;A8DYD2;A8DYD1;A0A0B4LF29;A0A126GUP1	A8DYD3;A1Z9M3;B7YZE6;A0A0B4LFC7;A8DYD2;A8DYD1;A0A0B4LF29;A0A126GUP1	cg		Ventral Tl10B (3)
356	Q8T085;A1Z8S4;A0A0B4LG64;A0A0B4LF50	Q8T085;A1Z8S4;A0A0B4LG64;A0A0B4LF50	Mppe		Ventral Tl10B (3)
344	A0A0B4LET2;Q9V979	A0A0B4LET2;Q9V979	Cyp6u1	Probable cytochrome P450 6u1	Ventral Tl10B (3)
317	A0A0B4KHX3;O76324	A0A0B4KHX3;O76324	dco	Discs overgrown protein kinase	Ventral Tl10B (3)
308	A0A0B4KHS9;P48461;A8QI94	A0A0B4KHS9;P48461	Pp1alpha-96A	Serine/threonine-protein phosphatase;Serine/threonine-protein phosphatase alpha-1 isoform	Ventral Tl10B (3)
293	A0A0B4KHH6;Q9VAF4;A0A0B4LHU7	A0A0B4KHH6;Q9VAF4;A0A0B4LHU7	dgt1		Ventral Tl10B (3)
283	A0A0B4KHB2	A0A0B4KHB2	CtBP		Ventral Tl10B (3)
266	Q9V3X2;A0A0B4KH03	Q9V3X2;A0A0B4KH03	Tsp96F	Tetraspanin	Ventral Tl10B (3)
256	Q9VEL0;A0A0B4KGU2;C7LAF3	Q9VEL0;A0A0B4KGU2;C7LAF3	lute;CG5319-RA		Ventral Tl10B (3)
248	A4V370;A0A0B4KGL5;P49283;A0A0B4K7L4	A4V370;A0A0B4KGL5;P49283;A0A0B4K7L4	Mvl	Protein Malvolio	Ventral Tl10B (3)
238	A0A0B4KGD7;A0A0B4K6D6;A0A0B4K778;A0A0B4K698;Q9U1H0	A0A0B4KGD7;A0A0B4K6D6;A0A0B4K778;A0A0B4K698;Q9U1H0	cic	Putative transcription factor capicua	Ventral Tl10B (3)
237	O61602;Q9W1M6;A0A0B4KGD0;Q8MLR4	O61602;Q9W1M6;A0A0B4KGD0;Q8MLR4	apt		Ventral Tl10B (3)
232	A0A0B4KG85	A0A0B4KG85	Jupiter		Ventral Tl10B (3)
147	A0A0B4KER9;Q9V730;D5SHU8	A0A0B4KER9;Q9V730	ttv	Exostosin-1	Ventral Tl10B (3)
142	A0A0B4KEK7;Q9V637	A0A0B4KEK7;Q9V637	PI31	Proteasome inhibitor PI31 subunit	Ventral Tl10B (3)
121	A0A0B4K882;Q7K2Y9	A0A0B4K882;Q7K2Y9	tun	Protein N-terminal glutamine amidohydrolase	Ventral Tl10B (3)
113	A0A0B4K7Y7;Q9VAW5;A0A0B4K6K9	A0A0B4K7Y7;Q9VAW5;A0A0B4K6K9	larp	La-related protein 1	Ventral Tl10B (3)
105	A0A0B4K7R5;E1JH79;Q9NKV0	A0A0B4K7R5;E1JH79;Q9NKV0	Mlf	Myeloid leukemia factor	Ventral Tl10B (3)
102	A0A0B4K7P1;Q9N6D8;Q8IMZ4	A0A0B4K7P1;Q9N6D8;Q8IMZ4	p53		Ventral Tl10B (3)
75	A0A0B4K6X3;A1Z6E0	A0A0B4K6X3;A1Z6E0	gus	Protein gustavus	Ventral Tl10B (3)
73	A0A0B4K6W1;P08970	A0A0B4K6W1;P08970	su(Hw)	Protein suppressor of hairy wing	Ventral Tl10B (3)
58	A0A0B4K6J3;Q8IMW5;A0A0C4DHB7;A0A0B4K7S6	A0A0B4K6J3;Q8IMW5;A0A0C4DHB7;A0A0B4K7S6	mld		Ventral Tl10B (3)
42	A0A0B4K680;Q9VFK6	A0A0B4K680;Q9VFK6	pr-set7	Histone-lysine N-methyltransferase pr-set7	Ventral Tl10B (3)
38	A0A0B4K657;Q6XK20;B7Z0K1	A0A0B4K657	btsz		Ventral Tl10B (3)
8	A0A0B4JCU5;Q9W1W9	A0A0B4JCU5;Q9W1W9	CG9849	PRADC1-like protein	Ventral Tl10B (3)
5011	Q9VQT6	Q9VQT6			Ventral Tl10B (3)
5380	Q9VVD9	Q9VVD9	Papst2	Adenosine 3-phospho 5-phosphosulfate transporter 2	Ventral Tl10B (3)
6	A0A0B4JD24;A0A0B4JCR9;Q7JQT8	A0A0B4JD24;A0A0B4JCR9;Q7JQT8			Ventral Tl10B (3)
241	A0A0B4KGF7;Q9VMY5;Q0KIE6	A0A0B4KGF7;Q9VMY5;Q0KIE6	beta-Man		Ventral spn27A (4)
397	A0A0B4LFY9	A0A0B4LFY9			Ventral spn27A (4)
3643	Q9V9Z0	Q9V9Z0			Ventral spn27A (4)
4856	Q9VNX1	Q9VNX1	DNApol-eta		Ventral spn27A (4)
5029	Q9VR06	Q9VR06			Ventral spn27A (4)
5038	Q9VR44	Q9VR44			Ventral spn27A (4)
5108	Q9VRY7;Q8T476	Q9VRY7;Q8T476	CG10099		Ventral spn27A (4)
5270	Q9VU04	Q9VU04			Ventral spn27A (4)
6336	Q9Y166	Q9Y166	Dic1		Ventral spn27A (4)
3078	Q8MMD0	Q8MMD0			Ventral spn27A (4)
2904	X2J9E1;Q8IM87;Q9V483;L0MPR2	X2J9E1;Q8IM87;Q9V483;L0MPR2	unc-13		Ventral spn27A (4)
2802	Q7KV24	Q7KV24			Ventral spn27A (4)
2524	Q7JZ56	Q7JZ56	S2P		Ventral spn27A (4)
2382	Q6IGX8	Q6IGX8	CG4806-RA		Ventral spn27A (4)
1773	Q9W4W6;O76865	Q9W4W6;O76865	Csat		Ventral spn27A (4)
1092	Q9VKU1;E1JHE4	Q9VKU1;E1JHE4	Fatp		Ventral spn27A (4)
781	A4V3W8;Q9U1M2	A4V3W8;Q9U1M2	CG32795	Transmembrane protein 120 homolog	Ventral spn27A (4)
539	A1Z6G4	A1Z6G4	CG17508-RA		Ventral spn27A (4)
1963	P25160	P25160	Arl1	ADP-ribosylation factor-like protein 1	Ventral spn27A (4)
1881	P11995	P11995	Lsp1alpha	Larval serum protein 1 alpha chain	Ventral spn27A (4)
94	A0A0B4K7G4;P13469	A0A0B4K7G4;P13469	mod	DNA-binding protein modulo	Ventral spn27A (4)
98	Q95U21;Q7JQ36;A0A0B4K7J3	Q95U21;Q7JQ36;A0A0B4K7J3	sax	Receptor protein serine/threonine kinase	Ventral spn27A (4)
125	A0A0B4K8A5;Q9W2F2	A0A0B4K8A5;Q9W2F2	mahj	Protein mahjong	Ventral spn27A (4)
222	A0A0B4KFZ0;P81928	A0A0B4KFZ0;P81928	140up	RPII140-upstream gene protein	Ventral spn27A (4)
225	A0A0B4KG41;Q9VES1	A0A0B4KG41;Q9VES1	CG10326	ARL-6-interacting protein 1 homolog	Ventral spn27A (4)
277	A0A0B4KH85;Q9VEW2	A0A0B4KH85;Q9VEW2	CG17931	Putative SERF-like protein	Ventral spn27A (4)
310	A0A0B4KHU1;Q9VDG2	A0A0B4KHU1;Q9VDG2	Rlip	RalA-binding protein 1	Ventral spn27A (4)
1797	O77434;M9PGI6	O77434;M9PGI6	Sec22		Ventral spn27A (4)
314	A0A0B4KHW1;Q9VD28	A0A0B4KHW1;Q9VD28	PSR	Bifunctional arginine demethylase and lysyl-hydroxylase PSR	Ventral spn27A (4)
337	A0A0B4KI71	A0A0B4KI71	Map205		Ventral spn27A (4)
407	A0A0B4LGA2	A0A0B4LGA2			Ventral spn27A (4)
422	A0A0B4LHH1;Q960R0;Q9W1B5;A0A0B4LGJ9	A0A0B4LHH1;Q960R0;Q9W1B5;A0A0B4LGJ9	CG3209-RA		Ventral spn27A (4)
581	A1Z7M8;A0A0B4LEH6	A1Z7M8;A0A0B4LEH6	Ance-4		Ventral spn27A (4)
594	A1Z7X7	A1Z7X7	GstT2		Ventral spn27A (4)
599	A1Z818;E1JH25;E1JH24	A1Z818;E1JH25;E1JH24			Ventral spn27A (4)
1708	O18338;M9NEE8	O18338;M9NEE8	Rab8		Ventral spn27A (4)
607	Q8T008;A1Z8A7;A8DY95	Q8T008;A1Z8A7;A8DY95			Ventral spn27A (4)
669	A1ZA83	A1ZA83			Ventral spn27A (4)
671	A1ZAA9	A1ZAA9			Ventral spn27A (4)
769	A4V392;Q9VCY8	A4V392;Q9VCY8	AdipoR	Adiponectin receptor protein	Ventral spn27A (4)
780	A4V3W7;Q8IRV6;Q9W4W3;Q9VM89	A4V3W7;Q8IRV6;Q9W4W3	CG2694-RA		Ventral spn27A (4)
790	A4V4C1;M9NGA3;M9NDU6;M9PHA6;P08182	A4V4C1;M9NGA3;M9NDU6;M9PHA6;P08182	CkIIbeta	Casein kinase II subunit beta	Ventral spn27A (4)
841	A8JNT7	A8JNT7	Hsc20		Ventral spn27A (4)
854	A8JR82;E2QD55;A8JR81;E2QD56;E1JIT7	A8JR82;E2QD55;A8JR81;E2QD56;E1JIT7	Efa6		Ventral spn27A (4)
867	A8JUY3	A8JUY3		DNA-directed RNA polymerase	Ventral spn27A (4)
883	B5RIN0;M9PB50;Q9VMD6	B5RIN0;M9PB50;Q9VMD6	retm	Protein real-time	Ventral spn27A (4)
889	B5RJQ0;Q95028	B5RJQ0;Q95028	ImpL3	L-lactate dehydrogenase	Ventral spn27A (4)
911	B7YZT3;B7YZT2;A1Z6G3;Q8SYX2	B7YZT3;B7YZT2;A1Z6G3;Q8SYX2	Fis1		Ventral spn27A (4)
914	Q9VJJ8;Q9VJJ9;M9PD19;B7YZW3	Q9VJJ8;Q9VJJ9;M9PD19;B7YZW3	CG4668;CG42389-RF		Ventral spn27A (4)
1702	O17468	O17468	Hira	Protein HIRA homolog	Ventral spn27A (4)
1046	D1Z367;Q9VEX0	D1Z367;Q9VEX0	Sulf1-RA;Sulf1	Extracellular sulfatase SULF-1 homolog	Ventral spn27A (4)
1068	E1JGK8	E1JGK8			Ventral spn27A (4)
1145	X2JCI4;E1JJD5;P13217	X2JCI4;E1JJD5;P13217	norpA	Phosphoinositide phospholipase C;1-phosphatidylinositol 4,5-bisphosphate phosphodiesterase	Ventral spn27A (4)
1148	E1JJF4;Q9U969	E1JJF4;Q9U969	sws	Neuropathy target esterase sws	Ventral spn27A (4)
1686	O01666	O01666	ATPsyn-gamma	ATP synthase subunit gamma, mitochondrial	Ventral spn27A (4)
1161	E1JJR3;Q9VWI1	E1JJR3;Q9VWI1	pcm		Ventral spn27A (4)
1190	E6EK15;Q9V4C7;Q59DQ0;E6EK17;E6EK18	E6EK15;Q9V4C7;Q59DQ0;E6EK17;E6EK18	PMCA	Calcium-transporting ATPase	Ventral spn27A (4)
1220	M9NDI6;H5V8B8	M9NDI6;H5V8B8	Pp2A-29B		Ventral spn27A (4)
1245	M9MRH8;Q8IPB9;Q9VKX1	M9MRH8;Q8IPB9;Q9VKX1	Cnot4		Ventral spn27A (4)
1639	M9PH85;Q9Y0Y7	M9PH85;Q9Y0Y7	CG2061	LanC-like protein 3 homolog	Ventral spn27A (4)
1263	Q8IRG7;M9MRY7;Q8SZU6	Q8IRG7;M9MRY7;Q8SZU6			Ventral spn27A (4)
1326	M9NE97;Q9W3X9	M9NE97;Q9W3X9	Ctr1A		Ventral spn27A (4)
1330	M9NEL1;Q9VXF1	M9NEL1;Q9VXF1	CanA-14F	Serine/threonine-protein phosphatase;Serine/threonine-protein phosphatase 2B catalytic subunit 3	Ventral spn27A (4)
1397	M9PBM0;O18391	M9PBM0;O18391	kraken	Probable serine hydrolase	Ventral spn27A (4)
1401	Q8SXR1;M9PBN2	Q8SXR1;M9PBN2	NLaz		Ventral spn27A (4)
1459	M9PCR4;Q9VUY8	M9PCR4;Q9VUY8	CG12272	WASH complex subunit strumpellin homolog	Ventral spn27A (4)
1461	M9PCV9;Q9VVI9	M9PCV9;Q9VVI9	Vps60;CG6259	Charged multivesicular body protein 5	Ventral spn27A (4)
1478	M9PD50;Q7KTX8;A8JNW4	M9PD50;Q7KTX8;A8JNW4	skd	Mediator of RNA polymerase II transcription subunit 13	Ventral spn27A (4)
1483	M9PD73;M9PDF6;Q9VIT9;M9PDR0	M9PD73;M9PDF6;Q9VIT9;M9PDR0	Tep4		Ventral spn27A (4)
1556	M9PF96;Q9VWC8	M9PF96;Q9VWC8	Pmp70		Ventral spn27A (4)
1599	M9PG81;M9PGM0;O76878	M9PG81;M9PGM0;O76878	CG11448	RILP-like protein homolog	Ventral spn27A (4)
1623	M9PH08;M9PGN1;Q960X4	M9PH08;M9PGN1;Q960X4	Tip60	Histone acetyltransferase;Histone acetyltransferase Tip60	Ventral spn27A (4)
1883	P11997	P11997	Lsp1gamma	Larval serum protein 1 gamma chain	Ventral spn27A (4)
1924	P20007	P20007	Pepck	Phosphoenolpyruvate carboxykinase [GTP]	Ventral spn27A (4)
1969	P25823;A0A0B4LG05	P25823;A0A0B4LG05	tud	Maternal protein tudor	Ventral spn27A (4)
1972	P26017	P26017	Pc	Polycomb group protein Pc	Ventral spn27A (4)
1975	P26802	P26802	Dbp73D	Probable ATP-dependent RNA helicase Dbp73D	Ventral spn27A (4)
1978	P28518	P28518	Xpac	DNA repair protein complementing XP-A cells homolog	Ventral spn27A (4)
2057	P49021	P49021	tim	Protein timeless	Ventral spn27A (4)
2067	P50536	P50536	msl-3	Protein male-specific lethal-3	Ventral spn27A (4)
2097	X2JB15;P54631	X2JB15;P54631	scw	Protein screw	Ventral spn27A (4)
2130	P92204	P92204	Nelf-E	Negative elongation factor E	Ventral spn27A (4)
2171	Q0E8Q7;E1JHH7	Q0E8Q7			Ventral spn27A (4)
2273	Q24472	Q24472	Rbf	Retinoblastoma family protein	Ventral spn27A (4)
2285	Q26263	Q26263	dpn	Protein deadpan	Ventral spn27A (4)
2341	Q4V6J1	Q4V6J1	GstE10		Ventral spn27A (4)
2375	Q6AWJ5	Q6AWJ5	svr		Ventral spn27A (4)
2399	Q6NP91	Q6NP91			Ventral spn27A (4)
2434	Q7JRC0	Q7JRC0			Ventral spn27A (4)
2469	Q7JVP4	Q7JVP4	Br140		Ventral spn27A (4)
2493	Q7JWW5	Q7JWW5	CG8078	Cytoplasmic tRNA 2-thiolation protein 1	Ventral spn27A (4)
2507	Q7JXG9	Q7JXG9	CG9005-RA		Ventral spn27A (4)
2565	Q7K121	Q7K121			Ventral spn27A (4)
2570	Q7K157	Q7K157			Ventral spn27A (4)
2682	Q7K9H6	Q7K9H6	Sara		Ventral spn27A (4)
2684	Q7KB18	Q7KB18	Jheh2		Ventral spn27A (4)
2690	Q7KJ73	Q7KJ73	Tsp42Ee	Tetraspanin	Ventral spn27A (4)
2726	Q7KNF1	Q7KNF1	drosha		Ventral spn27A (4)
2732	Q7KR10	Q7KR10	Cyp12d1-d	Probable cytochrome P450 12d1 distal, mitochondrial	Ventral spn27A (4)
2751	Q7KSQ2;Q9VGK8;Q8INJ8	Q7KSQ2;Q9VGK8;Q8INJ8	Csk	Non-specific protein-tyrosine kinase	Ventral spn27A (4)
2808	Q9W093;Q7KVA8;M9PGV2;M9MRP1	Q9W093;Q7KVA8;M9PGV2;M9MRP1	CG13921-RB		Ventral spn27A (4)
2898	Q8I937	Q8I937			Ventral spn27A (4)
3099	Q8MSB1	Q8MSB1	CG13638		Ventral spn27A (4)
3122	Q8MVS5	Q8MVS5	Pgant35A	Polypeptide N-acetylgalactosaminyltransferase 35A	Ventral spn27A (4)
2562	Q7K105	Q7K105	Myd88		Ventral spn27A (4)
84	A0A0B4K739	A0A0B4K739	mus210		Ventral spn27A (4)
6544	X2JE61;A8JV35;M9PHE6;Q9W3E3;A8JV32	X2JE61;A8JV35;M9PHE6;Q9W3E3;A8JV32	CG33181-RG		Ventral spn27A (4)
6240	Q9W579	Q9W579	inc		Ventral spn27A (4)
6212	Q9W4U2	Q9W4U2			Ventral spn27A (4)
6182	Q9W4G1	Q9W4G1			Ventral spn27A (4)
6167	Q9W469	Q9W469			Ventral spn27A (4)
6094	Q9W3K4	Q9W3K4			Ventral spn27A (4)
6025	Q9W2T3	Q9W2T3			Ventral spn27A (4)
5984	Q9W293	Q9W293			Ventral spn27A (4)
5801	Q9VZY9;M9PBJ9	Q9VZY9	Aats-pro		Ventral spn27A (4)
5777	Q9VZM7	Q9VZM7	IntS10		Ventral spn27A (4)
5773	Q9VZL2	Q9VZL2	ida		Ventral spn27A (4)
5738	Q9VZ56;X2JB52	Q9VZ56;X2JB52		Purple acid phosphatase	Ventral spn27A (4)
5687	Q9VYK7	Q9VYK7			Ventral spn27A (4)
5684	Q9VYJ7;M9PHP0	Q9VYJ7	CG4004-RA		Ventral spn27A (4)
5658	Q9VYA1;Q9I7S2	Q9VYA1			Ventral spn27A (4)
5634	Q9VXY9	Q9VXY9	opm		Ventral spn27A (4)
5596	Q9VXN0	Q9VXN0	CG15914	Glycosyltransferase-like domain-containing protein 1-like	Ventral spn27A (4)
5566	Q9VXD6	Q9VXD6			Ventral spn27A (4)
5563	Q9VXB1	Q9VXB1	CG4768-RA		Ventral spn27A (4)
5545	Q9VX51;Q86B46	Q9VX51;Q86B46			Ventral spn27A (4)
5507	Q9VWP5;R9PY26	Q9VWP5;R9PY26			Ventral spn27A (4)
5504	Q9VWP1	Q9VWP1	Usp39		Ventral spn27A (4)
5368	Q9VVA1	Q9VVA1	CG9706-RA		Ventral spn27A (4)
5349	Q9VV39	Q9VV39	mRpS34		Ventral spn27A (4)
5340	Q9VUX1	Q9VUX1	mRpS31		Ventral spn27A (4)
5322	Q9VUQ5;M9PFK7;REV__O97365	Q9VUQ5;M9PFK7	AGO2	Protein argonaute-2	Ventral spn27A (4)
5319	Q9VUM3	Q9VUM3			Ventral spn27A (4)
5245	Q9VTT2	Q9VTT2	l(3)j2D3		Ventral spn27A (4)
5219	Q9VTE2	Q9VTE2	SuUR	Protein suppressor of underreplication	Ventral spn27A (4)
5193	Q9VT04;Q9VT03	Q9VT04;Q9VT03	path		Ventral spn27A (4)
5177	Q9VSU7	Q9VSU7	Use1	Vesicle transport protein USE1	Ventral spn27A (4)
5168	Q9VSP0	Q9VSP0			Ventral spn27A (4)
5144	Q9VSG9	Q9VSG9			Ventral spn27A (4)
5138	Q9VSE2	Q9VSE2	mus301		Ventral spn27A (4)
5121	Q9VS55	Q9VS55	CTCF		Ventral spn27A (4)
5100	Q9VRV7	Q9VRV7	CG13298	Splicing factor 3B subunit 6-like protein	Ventral spn27A (4)
5082	Q9VRN3	Q9VRN3	Eaf6		Ventral spn27A (4)
5052	Q9VR99	Q9VR99	cactin	Cactin	Ventral spn27A (4)
5037	Q9VR42	Q9VR42			Ventral spn27A (4)
5030	Q9VR17	Q9VR17	Bsg25A		Ventral spn27A (4)
4994	Q9VQK9	Q9VQK9	GABPI	Palmitoyltransferase	Ventral spn27A (4)
4988	Q9VQJ6;Q8IPZ5	Q9VQJ6;Q8IPZ5			Ventral spn27A (4)
4934	Q9VPU0	Q9VPU0			Ventral spn27A (4)
4882	Q9VP87	Q9VP87			Ventral spn27A (4)
4854	Q9VNW8	Q9VNW8	CG7458-RA		Ventral spn27A (4)
4852	Q9VNW1	Q9VNW1			Ventral spn27A (4)
4844	Q9VNR6	Q9VNR6	l(3)04053		Ventral spn27A (4)
4608	Q9VL06	Q9VL06			Ventral spn27A (4)
4553	Q9VKH0	Q9VKH0	CG6488	Conserved oligomeric Golgi complex subunit 8	Ventral spn27A (4)
4520	Q9VK44	Q9VK44			Ventral spn27A (4)
4512	Q9VK28	Q9VK28			Ventral spn27A (4)
4496	Q9VJY3	Q9VJY3			Ventral spn27A (4)
4495	Q9VJX8	Q9VJX8	CG9267-RA		Ventral spn27A (4)
4493	Q9VJW1	Q9VJW1	Sec71		Ventral spn27A (4)
4440	X2J6X1;Q9VJ26	X2J6X1;Q9VJ26	Swip-1	EF-hand domain-containing protein D2 homolog	Ventral spn27A (4)
4381	Q9VIH0	Q9VIH0	NTH1	Endonuclease III homolog	Ventral spn27A (4)
4353	Q9VI57	Q9VI57	Dpck		Ventral spn27A (4)
4328	Q9VHU1	Q9VHU1	CG9630	Probable ATP-dependent RNA helicase DDX55 homolog	Ventral spn27A (4)
4325	Q9VHT3	Q9VHT3	Sgt1		Ventral spn27A (4)
4310	Q9VHN0	Q9VHN0			Ventral spn27A (4)
4272	Q9VHC5	Q9VHC5	JHDM2		Ventral spn27A (4)
4234	Q9VH02	Q9VH02	CG6293-RA		Ventral spn27A (4)
4158	Q9VG59	Q9VG59	CG5608-RA		Ventral spn27A (4)
4079	Q9VF28	Q9VF28	Arpc3A	Actin-related protein 2/3 complex subunit 3	Ventral spn27A (4)
3976	Q9VDW6;A0A0B4KGB9;Q9VDW3;A0A0B4KHE2;Q7YU29	Q9VDW6	Dys	Dystrophin, isoforms A/C/F/G/H	Ventral spn27A (4)
3937	Q9VDE3;A0A0B4KHK1	Q9VDE3;A0A0B4KHK1	slmb		Ventral spn27A (4)
3909	Q9VD13	Q9VD13	lqfR		Ventral spn27A (4)
3900	Q9VCX4;A0A0B4LIH0	Q9VCX4;A0A0B4LIH0	EF-G2	Ribosome-releasing factor 2, mitochondrial	Ventral spn27A (4)
3852	Q9VCD9	Q9VCD9			Ventral spn27A (4)
3839	Q9VCB1	Q9VCB1	CG13609	Protein PTOV1 homolog	Ventral spn27A (4)
3797	Q9VBX5	Q9VBX5	CG10057		Ventral spn27A (4)
3785	Q9VBU4	Q9VBU4			Ventral spn27A (4)
3769	Q9VBN5	Q9VBN5	RpL27	60S ribosomal protein L27	Ventral spn27A (4)
3751	Q9VBA0;Q8IMQ8	Q9VBA0;Q8IMQ8	CG6330-RB		Ventral spn27A (4)
3709	Q9VAT0;Q86B74	Q9VAT0;Q86B74	WASp		Ventral spn27A (4)
3708	Q9VAR0	Q9VAR0			Ventral spn27A (4)
3705	Q9VAQ5	Q9VAQ5	CG11837	Probable dimethyladenosine transferase	Ventral spn27A (4)
3692	Q9VAM5	Q9VAM5	Brd8		Ventral spn27A (4)
3630	Q9V9T9	Q9V9T9	betaGlu	Beta-glucuronidase	Ventral spn27A (4)
3620	Q9V9M7	Q9V9M7	RpL21		Ventral spn27A (4)
3510	Q9V3V2	Q9V3V2	Fkbp14		Ventral spn27A (4)
3477	Q9V3F9	Q9V3F9	out		Ventral spn27A (4)
3474	Q9V3F2	Q9V3F2	lace		Ventral spn27A (4)
3462	Q9V3C5	Q9V3C5	Rich	Guanine nucleotide exchange factor subunit Rich	Ventral spn27A (4)
3457	Q9V3B4	Q9V3B4	Fadd	Fas-associated death domain protein	Ventral spn27A (4)
3447	Q9UAS6	Q9UAS6	cmtr2	Cap-specific mRNA (nucleoside-2-O-)-methyltransferase 2	Ventral spn27A (4)
3437	Q9U616	Q9U616	ppl	Glycine cleavage system H protein, mitochondrial	Ventral spn27A (4)
3430	Q9U3V9	Q9U3V9	xmas-2	Protein xmas-2	Ventral spn27A (4)
3416	Q9NG60	Q9NG60	eIF2D		Ventral spn27A (4)
3350	Q960T2;F3YDF6;A0A0B4LH71	Q960T2;F3YDF6;A0A0B4LH71	Sap47;Sap47-RI	Synapse-associated protein of 47 kDa	Ventral spn27A (4)
3310	Q95RV3	Q95RV3	Lhr		Ventral spn27A (4)
3306	Q95RR6;F3YDK4	Q95RR6;F3YDK4	Pur-alpha		Ventral spn27A (4)
3263	Q8T9H0;Q9VIJ3	Q8T9H0;Q9VIJ3	CG9328-RA		Ventral spn27A (4)
3233	Q8T0F5;Q9N675	Q8T0F5;Q9N675	Zyx		Ventral spn27A (4)
3183	Q8SY25	Q8SY25	CG10500		Ventral spn27A (4)
3182	Q8SY19;Q8SY70	Q8SY19;Q8SY70	Mgstl		Ventral spn27A (4)
67	A0A0B4K6N7;Q9VE34	A0A0B4K6N7;Q9VE34	CG14299	Ectopic P granules protein 5 homolog	Ventral spn27A (4)
53	Q9VG78;A0A0B4K6G3	Q9VG78;A0A0B4K6G3	pps		Ventral spn27A (4)
1801	O96299;O97479	O96299	Sodh-2		Ventral Tl10B spn27A (5)
1874	X2JGX8;P10734;P15370	X2JGX8;P10734	kni	Zygotic gap protein knirps	Ventral Tl10B spn27A (5)
4754	Q9VMP8	Q9VMP8			Ventral Tl10B spn27A (5)
5126	Q9VS84	Q9VS84	ltl		Ventral Tl10B spn27A (5)
6335	Q9Y165	Q9Y165	morgue		Ventral Tl10B spn27A (5)
2225	Q23973	Q23973	mtrm	Protein matrimony	Ventral Tl10B spn27A (5)
212	A0A0B4KFU2	A0A0B4KFU2	Ada2b		Ventral Tl10B spn27A (5)
6270	Q9XYA7;Q8INR0;Q8INQ9	Q9XYA7;Q8INR0;Q8INQ9	stck		Ventral Tl10B spn27A (5)
5424	Q9VVW2	Q9VVW2			Ventral Tl10B spn27A (5)
1876	P11046	P11046	LanB1	Laminin subunit beta-1	Ventral Tl10B spn27A (5)
4365	Q9VIC3	Q9VIC3	alpha-Est1		Ventral Tl10B spn27A (5)
4249	Q9VH65;A0A0B4KFJ0	Q9VH65;A0A0B4KFJ0	CG12945-RB		Ventral Tl10B spn27A (5)
3819	Q9VC40	Q9VC40			Ventral Tl10B spn27A (5)
3053	X2JHT0;Q8IRY7	X2JHT0;Q8IRY7	Dredd	Caspase-8;Caspase-8 subunit p15;Caspase-8 subunit p10	Ventral Tl10B spn27A (5)
2902	Q8IGV3	Q8IGV3			Ventral Tl10B spn27A (5)
2777	Q7KTS4	Q7KTS4	Hdac3	Histone deacetylase	Ventral Tl10B spn27A (5)
15	A0A0B4JCZ3	A0A0B4JCZ3	pre-mod(mdg4)-W		Ventral Tl10B spn27A (5)
47	A0A0B4LIB9;A0A0B4K6A8	A0A0B4LIB9;A0A0B4K6A8			Ventral Tl10B spn27A (5)
150	A0A0B4KG58;B7YZJ2;E1JH90;A0A0B4KET5;A0A0B4KFA4;E1JH91;A0A0B4KEY4;A0A0B4KFU3;B7YZJ1;A1ZAU8;A0A0B4KEY6	A0A0B4KG58;B7YZJ2;E1JH90;A0A0B4KET5;A0A0B4KFA4;E1JH91;A0A0B4KEY4;A0A0B4KFU3;B7YZJ1;A1ZAU8;A0A0B4KEY6	Patronin	Patronin	Ventral Tl10B spn27A (5)
233	A0A0B4KG87;Q6NQZ7	A0A0B4KG87;Q6NQZ7	Tab2		Ventral Tl10B spn27A (5)
269	A0A0B4KH26;Q9VH20;A0A0B4KG32	A0A0B4KH26;Q9VH20;A0A0B4KG32	TAF1B;CG6241	TATA box-binding protein-associated factor RNA polymerase I subunit B	Ventral Tl10B spn27A (5)
286	A0A0B4KHD3;Q7KSC4	A0A0B4KHD3;Q7KSC4	Mpc1	Mitochondrial pyruvate carrier 1	Ventral Tl10B spn27A (5)
411	A0A0B4LGC1;P10627	A0A0B4LGC1;P10627	twi	Protein twist	Ventral Tl10B spn27A (5)
454	A0A0B4LH99;Q9VED0	A0A0B4LH99;Q9VED0	CG7218	Protein TAPT1 homolog	Ventral Tl10B spn27A (5)
471	A0A0B4LHT3;Q9VAS7	A0A0B4LHT3;Q9VAS7	Inx3	Innexin;Innexin inx3	Ventral Tl10B spn27A (5)
589	Q95T49;A1Z7S4;C9QPE2	Q95T49;A1Z7S4;C9QPE2	CG8026-RB		Ventral Tl10B spn27A (5)
748	A4V0S1;Q24509	A4V0S1;Q24509	Syx5	Syntaxin-5	Ventral Tl10B spn27A (5)
869	A8JV07	A8JV07			Ventral Tl10B spn27A (5)
970	X2JCX8;C0HKA1;C0HKA0	X2JCX8;C0HKA1;C0HKA0	RpS14b		Ventral Tl10B spn27A (5)
1111	E1JI84;Q8IQC1	E1JI84;Q8IQC1	CG5021	Golgi apparatus membrane protein TVP23 homolog;Uncharacterized Golgi apparatus membrane protein-like protein CG5021	Ventral Tl10B spn27A (5)
1142	E1JJ86;Q6IKI1	E1JJ86;Q6IKI1	Kmn2		Ventral Tl10B spn27A (5)
1182	E2QCZ9;Q7JZB4	E2QCZ9;Q7JZB4	CG1129	Mannose-1-phosphate guanyltransferase beta	Ventral Tl10B spn27A (5)
1247	M9MSI8;M9MRP6;M9MRV1;M9MRK7;X2JAP2;X2JA38	M9MSI8;M9MRP6;M9MRV1;M9MRK7;X2JAP2;X2JA38	tweek		Ventral Tl10B spn27A (5)
1291	Q7KV91;Q7KV95;Q9W004;Q7KV94;M9ND26;M9PE19	Q7KV91;Q7KV95;Q9W004;Q7KV94;M9ND26;M9PE19	CG16758-RF	Purine nucleoside phosphorylase	Ventral Tl10B spn27A (5)
1443	X2J9V7;Q8IPG6;M9PCI1	X2J9V7;Q8IPG6;M9PCI1			Ventral Tl10B spn27A (5)
1590	M9PIB5;Q9VPG7;M9PG08	M9PIB5;Q9VPG7;M9PG08	RhoBTB		Ventral Tl10B spn27A (5)
1661	M9PI05;Q9V3I5	M9PI05;Q9V3I5	JIL-1	Chromosomal serine/threonine-protein kinase JIL-1	Ventral Tl10B spn27A (5)
1785	O76994	O76994	Ip259		Ventral Tl10B spn27A (5)
1864	P08044	P08044	sna	Protein snail	Ventral Tl10B spn27A (5)
2051	P48592	P48592	RnrS	Ribonucleoside-diphosphate reductase subunit M2	Ventral Tl10B spn27A (5)
2112	P83097	P83097	Wsck	Putative tyrosine-protein kinase Wsck	Ventral Tl10B spn27A (5)
2149	Q06849	Q06849	Arl2	ADP-ribosylation factor-like protein 2	Ventral Tl10B spn27A (5)
2182	Q0E959	Q0E959	mRpL34	39S ribosomal protein L34, mitochondrial	Ventral Tl10B spn27A (5)
2257	Q24307	Q24307	Iap2	Apoptosis 2 inhibitor	Ventral Tl10B spn27A (5)
2298	Q29QN4	Q29QN4			Ventral Tl10B spn27A (5)
2346	Q500Y7	Q500Y7	UQCR-6.4		Ventral Tl10B spn27A (5)
2388	Q6IL18	Q6IL18			Ventral Tl10B spn27A (5)
2441	Q7JRH2;A0A0B4LG73	Q7JRH2	Reep1	Receptor expression-enhancing protein	Ventral Tl10B spn27A (5)
2516	Q7JYQ4	Q7JYQ4			Ventral Tl10B spn27A (5)
2598	Q7K264	Q7K264			Ventral Tl10B spn27A (5)
2649	Q7K4L9	Q7K4L9			Ventral Tl10B spn27A (5)
2787	Q7KU01;Q9VPU9	Q7KU01;Q9VPU9	PNUTS		Ventral Tl10B spn27A (5)
2832	Q7PL91	Q7PL91	ND-AGGG		Ventral Tl10B spn27A (5)
2886	Q8I079	Q8I079			Ventral Tl10B spn27A (5)
2914	Q8IMR4;Q9VBC5;Q8IMR3	Q8IMR4;Q9VBC5;Q8IMR3	CG5484-RA;CG5484-RB		Ventral Tl10B spn27A (5)
2984	Q8IPT1;Q8IPT0	Q8IPT1;Q8IPT0			Ventral Tl10B spn27A (5)
3018	Q8IQT0;M9PCW9	Q8IQT0;M9PCW9			Ventral Tl10B spn27A (5)
3127	Q8MZ22	Q8MZ22			Ventral Tl10B spn27A (5)
3175	Q8SXU0	Q8SXU0			Ventral Tl10B spn27A (5)
3251	Q8T4C4	Q8T4C4	ATPsynbetaL	ATP synthase subunit beta	Ventral Tl10B spn27A (5)
3316	Q95SH7	Q95SH7			Ventral Tl10B spn27A (5)
3362	Q9I7J4;Q961C8	Q9I7J4;Q961C8			Ventral Tl10B spn27A (5)
3428	Q9U1H9	Q9U1H9	sbr	Nuclear RNA export factor 1	Ventral Tl10B spn27A (5)
3478	Q9V3G1	Q9V3G1	RpL8	60S ribosomal protein L8	Ventral Tl10B spn27A (5)
3507	Q9V3U0	Q9V3U0	CG4500	Long-chain-fatty-acid--CoA ligase bubblegum-like	Ventral Tl10B spn27A (5)
3566	Q9V4D4	Q9V4D4	bip2		Ventral Tl10B spn27A (5)
3622	Q9V9N4;Q8IGP5;M9PIL6;M9PG92;Q7KAH0;M9NFP1;M9PGG2	Q9V9N4;Q8IGP5	Jupiter;Clamp		Ventral Tl10B spn27A (5)
3772	Q9VBP5;Q9VIM6	Q9VBP5	jigr1		Ventral Tl10B spn27A (5)
3791	Q9VBV8	Q9VBV8			Ventral Tl10B spn27A (5)
3977	Q9VDY1	Q9VDY1	Ino80	Putative DNA helicase Ino80	Ventral Tl10B spn27A (5)
4153	Q9VG31;Q9VG32;Q2QBM1	Q9VG31;Q9VG32;Q2QBM1	Men	Malic enzyme	Ventral Tl10B spn27A (5)
4185	Q9VGF5	Q9VGF5	Tango9		Ventral Tl10B spn27A (5)
4236	Q9VH08	Q9VH08	Sirt6	NAD-dependent protein deacetylase Sirt6	Ventral Tl10B spn27A (5)
4288	Q9VHH2;A0A0B4KGX5	Q9VHH2;A0A0B4KGX5	ird1		Ventral Tl10B spn27A (5)
4431	Q9VJ04	Q9VJ04			Ventral Tl10B spn27A (5)
4540	Q9VKC5	Q9VKC5	CG6770-RA		Ventral Tl10B spn27A (5)
4658	Q9VLM6	Q9VLM6	Rcd4		Ventral Tl10B spn27A (5)
4756	Q9VMQ6	Q9VMQ6			Ventral Tl10B spn27A (5)
4764	Q9VMS5	Q9VMS5	Bub1		Ventral Tl10B spn27A (5)
4859	Q9VNX9	Q9VNX9			Ventral Tl10B spn27A (5)
4885	Q9VPB7	Q9VPB7	CG11399-RB		Ventral Tl10B spn27A (5)
4953	Q9VQ34	Q9VQ34			Ventral Tl10B spn27A (5)
4996	Q9VQL2	Q9VQL2			Ventral Tl10B spn27A (5)
5119	Q9VS52	Q9VS52			Ventral Tl10B spn27A (5)
5291	Q9VU87	Q9VU87	Vps36	Vacuolar protein-sorting-associated protein 36	Ventral Tl10B spn27A (5)
5338	Q9VUW0	Q9VUW0			Ventral Tl10B spn27A (5)
5388	Q9VVH3	Q9VVH3			Ventral Tl10B spn27A (5)
5614	Q9VXT0	Q9VXT0			Ventral Tl10B spn27A (5)
5666	Q9VYD5	Q9VYD5		Branched-chain-amino-acid aminotransferase	Ventral Tl10B spn27A (5)
5796	Q9VZX6;REV__A1Z9E4	Q9VZX6	mRpS35		Ventral Tl10B spn27A (5)
5810	Q9W029	Q9W029	yellow-g		Ventral Tl10B spn27A (5)
5939	Q9W1M7	Q9W1M7	Pi3K59F	Phosphatidylinositol 3-kinase	Ventral Tl10B spn27A (5)
6022	Q9W2S1;Q7KVQ7	Q9W2S1;Q7KVQ7	Tango5		Ventral Tl10B spn27A (5)
6070	Q9W3C4	Q9W3C4	Hexo2		Ventral Tl10B spn27A (5)
6153	Q9W422	Q9W422	CG3781	Josephin-like protein	Ventral Tl10B spn27A (5)
6189	Q9W4J5	Q9W4J5	CG3527	Ribosomal RNA small subunit methyltransferase NEP1	Ventral Tl10B spn27A (5)
6302	Q9XZ68	Q9XZ68	betaggt-II		Ventral Tl10B spn27A (5)
6541	X2JCX4	X2JCX4			Ventral Tl10B spn27A (5)
1616	M9PGK0;Q9W4S7	M9PGK0;Q9W4S7	dm	Myc protein	Ventral Tl10B spn27A (5)
6545	X2JEF0	X2JEF0	Zw	Glucose-6-phosphate 1-dehydrogenase	Ventral Tl10B spn27A (5)
6306	Q9XZT1;B7Z116	Q9XZT1	MED18	Mediator of RNA polymerase II transcription subunit 18	Ventral Tl10B spn27A (5)
6191	Q9W4J7	Q9W4J7			Ventral Tl10B spn27A (5)
6179	X2JE64;Q9W4D4	X2JE64;Q9W4D4			Ventral Tl10B spn27A (5)
6081	Q9W3F5	Q9W3F5			Ventral Tl10B spn27A (5)
6069	Q9W3C3	Q9W3C3			Ventral Tl10B spn27A (5)
5988	Q9W2B3	Q9W2B3			Ventral Tl10B spn27A (5)
5896	Q9W141	Q9W141	CG4692	Putative ATP synthase subunit f, mitochondrial	Ventral Tl10B spn27A (5)
5809	Q9W028	Q9W028	yellow-g2		Ventral Tl10B spn27A (5)
5770	Q9VZJ9	Q9VZJ9	Mul1		Ventral Tl10B spn27A (5)
5638	Q9VY02	Q9VY02			Ventral Tl10B spn27A (5)
5422	Q9VVU6	Q9VVU6			Ventral Tl10B spn27A (5)
5379	Q9VVD3	Q9VVD3			Ventral Tl10B spn27A (5)
5300	Q9VUC3	Q9VUC3			Ventral Tl10B spn27A (5)
5209	Q9VT75	Q9VT75	vnc		Ventral Tl10B spn27A (5)
5019	Q9VQY7	Q9VQY7			Ventral Tl10B spn27A (5)
4978	Q9VQF5	Q9VQF5	Cwc25		Ventral Tl10B spn27A (5)
4930	Q9VPR7	Q9VPR7	cold		Ventral Tl10B spn27A (5)
4876	Q9VP65	Q9VP65	CG12975	Multifunctional methyltransferase subunit TRM112-like protein	Ventral Tl10B spn27A (5)
4792	Q9VN39;Q8T0Q2	Q9VN39;Q8T0Q2			Ventral Tl10B spn27A (5)
4758	Q9VMQ8	Q9VMQ8	CG7371-RA		Ventral Tl10B spn27A (5)
4707	Q9VM47;Q8SXU2	Q9VM47;Q8SXU2	Mnn1		Ventral Tl10B spn27A (5)
4643	X2J5D8;Q9VLC1;B9EQY2	X2J5D8;Q9VLC1;B9EQY2	FucTB	Alpha-(1,3)-fucosyltransferase B	Ventral Tl10B spn27A (5)
4532	Q9VK90;M9PBA6	Q9VK90;M9PBA6			Ventral Tl10B spn27A (5)
4357	Q9VI70	Q9VI70			Ventral Tl10B spn27A (5)
4239	Q9VH25	Q9VH25	gammaSnap2		Ventral Tl10B spn27A (5)
4217	Q9VGU6;REV__Q9VZS5;REV__D1Z3A1	Q9VGU6	Adk3	GTP:AMP phosphotransferase, mitochondrial	Ventral Tl10B spn27A (5)
4179	Q9VGE3	Q9VGE3			Ventral Tl10B spn27A (5)
4119	Q9VFJ1	Q9VFJ1			Ventral Tl10B spn27A (5)
3960	Q9VDQ4	Q9VDQ4	trem		Ventral Tl10B spn27A (5)
3778	Q9VBQ9	Q9VBQ9	MED28	Mediator of RNA polymerase II transcription subunit 28	Ventral Tl10B spn27A (5)
3754	Q9VBC4	Q9VBC4			Ventral Tl10B spn27A (5)
3610	Q9V8I2	Q9V8I2	CG5189	Ragulator complex protein LAMTOR2 homolog	Ventral Tl10B spn27A (5)
3563	Q9V493;Q7KQM8	Q9V493;Q7KQM8	CG11076-RA		Ventral Tl10B spn27A (5)
3503	Q9V3T1	Q9V3T1	mus81		Ventral Tl10B spn27A (5)
3432	Q9U4F3	Q9U4F3	Surf1	SURF1-like protein	Ventral Tl10B spn27A (5)
3392	Q9Y168;Q9I7L9	Q9Y168;Q9I7L9	BcDNA.GH02384		Ventral Tl10B spn27A (5)
3356	Q960X8	Q960X8	Hrs	Hepatocyte growth factor-regulated tyrosine kinase substrate	Ventral Tl10B spn27A (5)
3268	Q94515;M9PC47	Q94515	ifc		Ventral Tl10B spn27A (5)
3242	Q8T0V2;Q7KVN1;Q9I7V7;Q9I7V6	Q8T0V2;Q7KVN1;Q9I7V7;Q9I7V6	MESK2		Ventral Tl10B spn27A (5)
3174	Q8SXT8	Q8SXT8	SNF4Agamma		Ventral Tl10B spn27A (5)
3095	Q8MS27	Q8MS27	mRpL35	39S ribosomal protein L35, mitochondrial	Ventral Tl10B spn27A (5)
3009	Q8IQI5;Q8IQI4	Q8IQI5;Q8IQI4			Ventral Tl10B spn27A (5)
2925	Q8IMZ9;A0A0B4JDG5	Q8IMZ9;A0A0B4JDG5	wfs1		Ventral Tl10B spn27A (5)
2913	Q8IMP6	Q8IMP6	CG5815	Protein SPT2 homolog	Ventral Tl10B spn27A (5)
2843	Q7PLS8	Q7PLS8	IntS3	Integrator complex subunit 3 homolog	Ventral Tl10B spn27A (5)
2800	Q7KUZ2	Q7KUZ2	AlkB		Ventral Tl10B spn27A (5)
2705	Q7KMG7	Q7KMG7	Ercc1		Ventral Tl10B spn27A (5)
2635	Q7K3Z8	Q7K3Z8			Ventral Tl10B spn27A (5)
2584	Q7K1R6	Q7K1R6			Ventral Tl10B spn27A (5)
2500	Q7JXA2	Q7JXA2	L		Ventral Tl10B spn27A (5)
2440	Q86P32;Q7JRF1;Q7JY00	Q86P32;Q7JRF1;Q7JY00	Syx6		Ventral Tl10B spn27A (5)
2353	Q59E09;Q9VP61	Q59E09;Q9VP61	AcCoAS	Acetyl-coenzyme A synthetase	Ventral Tl10B spn27A (5)
2320	Q4QPR8	Q4QPR8			Ventral Tl10B spn27A (5)
2267	Q24371	Q24371	l(2)dtl	Protein lethal(2)denticleless	Ventral Tl10B spn27A (5)
2188	Q0E9B6;A1Z8U9	Q0E9B6;A1Z8U9	RpS11	40S ribosomal protein S11	Ventral Tl10B spn27A (5)
2180	Q0E931	Q0E931	Dgp-1		Ventral Tl10B spn27A (5)
2133	Q00449;E1JH49	Q00449;E1JH49	Mdr49	Multidrug resistance protein homolog 49	Ventral Tl10B spn27A (5)
2068	X2JDU0;P50882	X2JDU0;P50882	RpL9	60S ribosomal protein L9	Ventral Tl10B spn27A (5)
1919	P18935	P18935	mt:Cyt-b	Cytochrome b	Ventral Tl10B spn27A (5)
1791	X2JI07;O77264	X2JI07;O77264	CG4061	RNA 3-terminal phosphate cyclase	Ventral Tl10B spn27A (5)
1671	M9PIC3;Q9VPD3	M9PIC3;Q9VPD3			Ventral Tl10B spn27A (5)
1649	M9PHM6;Q9VS34	M9PHM6;Q9VS34	RpL18	60S ribosomal protein L18	Ventral Tl10B spn27A (5)
1575	Q8SXD5;M9PFQ2;Q0E8R1	Q8SXD5;M9PFQ2;Q0E8R1	vir-1		Ventral Tl10B spn27A (5)
1398	M9PBM1;Q94535	M9PBM1;Q94535	U2af38	Splicing factor U2af 38 kDa subunit	Ventral Tl10B spn27A (5)
1284	M9NCT3;Q9VKL9;M9NEE5;Q8IPB2	M9NCT3;Q9VKL9;M9NEE5;Q8IPB2			Ventral Tl10B spn27A (5)
1240	M9MRF2;Q9VMU4	M9MRF2;Q9VMU4	RpL37A	60S ribosomal protein L37a	Ventral Tl10B spn27A (5)
1175	E2QCR4;Q24009	E2QCR4;Q24009	BicC	Protein bicaudal C	Ventral Tl10B spn27A (5)
1139	E1JIZ7	E1JIZ7			Ventral Tl10B spn27A (5)
1096	E1JHM1;M9PDR8;Q9VIS1;E1JHM0	E1JHM1;M9PDR8;Q9VIS1;E1JHM0	CdGAPr	GTPase-activating protein CdGAPr	Ventral Tl10B spn27A (5)
874	A8Y535	A8Y535	UQCR-11	Cytochrome b-c1 complex subunit 6	Ventral Tl10B spn27A (5)
814	A8DYU9;Q9XYR0	A8DYU9;Q9XYR0	Traf4		Ventral Tl10B spn27A (5)
737	A2VEY9;Q9VTV6	A2VEY9;Q9VTV6	app	Palmitoyltransferase	Ventral Tl10B spn27A (5)
573	A1Z7G9	A1Z7G9	beta3GalTII		Ventral Tl10B spn27A (5)
465	Q9VCV1;A0A0B4LHK8	Q9VCV1;A0A0B4LHK8	CG6982-RC		Ventral Tl10B spn27A (5)
433	A0A0B4LGS0;P81641;P08144	A0A0B4LGS0;P81641;P08144	Amy-p;Amy-d	Alpha-amylase;Alpha-amylase B;Alpha-amylase A	Ventral Tl10B spn27A (5)
372	A0A0B4LFF6;Q7K3C2	A0A0B4LFF6;Q7K3C2			Ventral Tl10B spn27A (5)
278	A0A0B4KH87;Q9VAT1	A0A0B4KH87;Q9VAT1			Ventral Tl10B spn27A (5)
235	E0R905;Q7KSP5;A0A0B4KGA3;A0A0B4K6S1;A0A0B4K6F4;Q8SZN9	E0R905;Q7KSP5;A0A0B4KGA3;A0A0B4K6S1;A0A0B4K6F4;Q8SZN9	l(3)neo38-RA;l(3)neo38		Ventral Tl10B spn27A (5)
195	A0A0B4KFL0	A0A0B4KFL0	RanBPM		Ventral Tl10B spn27A (5)
82	A0A0B4K726;Q960E8	A0A0B4K726;Q960E8	Tfb1	General transcription factor IIH subunit 1	Ventral Tl10B spn27A (5)
21	A0A0B4JD23;Q8IMI0;A0A0B4JDE3;Q9VA53;A0A0B4KHJ3;A0A0B4KHF5	A0A0B4JD23;Q8IMI0;A0A0B4JDE3;Q9VA53;A0A0B4KHJ3;A0A0B4KHF5	CG2246-RB;CG2246-RA		Ventral Tl10B spn27A (5)
4562	Q9VKJ5	Q9VKJ5			Ventral Tl10B spn27A (5)
4148	Q9VG06	Q9VG06	CG17327-RA		Ventral Tl10B spn27A (5)
4104	Q9VFC1	Q9VFC1	Spn88Eb		Ventral Tl10B spn27A (5)
4038	Q9VEM0	Q9VEM0			Ventral Tl10B spn27A (5)
3021	Q8IQZ1	Q8IQZ1	GS	Glutathione synthetase	Ventral Tl10B spn27A (5)
2358	Q5BI03	Q5BI03			Ventral Tl10B spn27A (5)
2117	Q4AB57;P84051	Q4AB57;P84051	His2A:CG33859;His2A	Histone H2A	Ventral Tl10B spn27A (5)
1920	P19018	P19018	tra2	Transformer-2 sex-determining protein	Ventral Tl10B spn27A (5)
743	A4UZY2;P42519	A4UZY2;P42519	S	Protein Star	Ventral Tl10B spn27A (5)
4654	Q9VLL0;X2J591	Q9VLL0	U26	Acyl-CoA synthetase family member 4 homolog	Ventral Tl10B spn27A (5)
5502	Q9VWN9	Q9VWN9			Ventral Tl10B spn27A (5)
203	Q9VGV3;A0A0B4KFQ5	Q9VGV3;A0A0B4KFQ5	Tsp86D	Tetraspanin	Ventral Tl10B spn27A (5)
3655	Q9VA79	Q9VA79			Ventral Tl10B spn27A (5)
3074	Q8MLZ7;X2JA18;REV__O76460	Q8MLZ7;X2JA18	Idgf3	Chitinase-like protein Idgf3	Ventral Tl10B spn27A (5)
3733	Q9VB17	Q9VB17			Ventral Tl10B spn27A (5)
1177	E2QCY2;M9PCX4;Q9VVT8	E2QCY2;M9PCX4;Q9VVT8	CG3961-RD;CG3961-RA		Ventral Tl10B spn27A (5)
1118	E1JIG1;P29503	E1JIG1;P29503	neur	Protein neuralized	Ventral Tl10B spn27A (5)
4386	Q9VIJ5	Q9VIJ5	Pomp		Ventral Tl10B spn27A (5)
6214	Q9W4W7	Q9W4W7	EG:100G10.6		Ventral Tl10B spn27A (5)
56	A0A0B4K6I5;Q9VN45	A0A0B4K6I5;Q9VN45	spartin	Protein spartin	Ventral Tl10B spn27A (5)
281	A0A0B4KHA0;Q9I7J2	A0A0B4KHA0;Q9I7J2	m-cup		Dorsal + Lateral (6)
442	A0A0B4LGY0;A0A0B4LGZ0;Q9VH91;E1JIH1;A0A0B4LI11;A0A0B4LGY1;E1JIH2;E1JIH3	A0A0B4LGY0;A0A0B4LGZ0;Q9VH91;E1JIH1;A0A0B4LI11;A0A0B4LGY1;E1JIH2;E1JIH3	Unc-115a		Dorsal + Lateral (6)
5482	Q9VWF8	Q9VWF8			Dorsal + Lateral (6)
5851	Q9W0J9	Q9W0J9			Dorsal + Lateral (6)
2269	X2JCV2;Q24388	X2JCV2;Q24388	Lsp2	Larval serum protein 2	Dorsal + Lateral (6)
4333	Q9VHW0	Q9VHW0			Dorsal + Lateral (6)
4627	Q9VL67	Q9VL67			Dorsal + Lateral (6)
5861	Q9W0N6	Q9W0N6	Vti1		Dorsal + Lateral (6)
3253	Q8T4D6	Q8T4D6			Dorsal + Lateral (6)
741	A4UZW2;E4NKH6;M9PAY2;REV__O96827;REV__A0A0B4LFL3	A4UZW2	Sam-S	S-adenosylmethionine synthase	Dorsal + Lateral (6)
1677	Q7YU84;M9PIU6;P09956	Q7YU84;M9PIU6;P09956	z	Regulatory protein zeste	Dorsal + Lateral (6)
5033	Q9VR30	Q9VR30			Dorsal + Lateral (6)
5014	Q9VQU0	Q9VQU0			Dorsal + Lateral (6)
1431	M9PCQ7;M9PCB8;M9PB51;M9PC63;A8DYW2;M9PCC2;Q9VMA9;M9PEV6	M9PCQ7;M9PCB8;M9PB51;M9PC63;A8DYW2;M9PCC2;Q9VMA9;M9PEV6			Dorsal + Lateral (6)
605	A1Z893	A1Z893	CG12896-RA		Dorsal + Lateral (6)
200	A0A0B4KFP4;Q8INR6	A0A0B4KFP4;Q8INR6	gpp	Histone-lysine N-methyltransferase, H3 lysine-79 specific	Dorsal + Lateral (6)
320	A0A0B4KHY6;Q04688	A0A0B4KHY6;Q04688	Ets97D	DNA-binding protein Ets97D	Dorsal + Lateral (6)
1355	Q9VZC7;M9NFM7;A8JNK7;Q8IRB4	Q9VZC7;M9NFM7;A8JNK7;Q8IRB4	DOR		Dorsal + Lateral (6)
1515	M9PEA1;Q9VRQ5	M9PEA1;Q9VRQ5	CG5568		Dorsal + Lateral (6)
1568	M9PFL2;Q24533;Q9VUD1;M9PFG6;Q9VUD3;M9PCG2	M9PFL2;Q24533;Q9VUD1;M9PFG6;Q9VUD3;M9PCG2	D;Sox21a;Sox21b	SOX domain-containing protein dichaete	Dorsal + Lateral (6)
2790	Q7KUB1	Q7KUB1	Idh	Isocitrate dehydrogenase [NADP]	Dorsal + Lateral (6)
3056	Q8MKJ6	Q8MKJ6			Dorsal + Lateral (6)
4760	Q9VMR0	Q9VMR0			Dorsal + Lateral (6)
5732	Q9VZ24	Q9VZ24			Dorsal + Lateral (6)
6155	Q9W424	Q9W424	Spx		Dorsal + Lateral (6)
6224	Q9W509	Q9W509	Mct1		Dorsal + Lateral (6)
720	A1ZBR2	A1ZBR2	18w		Dorsal + Lateral (6)
630	A1Z933	A1Z933	CG33672-RA		Dorsal + Lateral (6)
503	X2JB24;A0A0S0WH10;Q9VU58	X2JB24;A0A0S0WH10;Q9VU58	Nplp2	Neuropeptide-like 2	Dorsal + Lateral (6)
489	A0A0C4DHD1;Q7KVH9	A0A0C4DHD1;Q7KVH9	CG4091	Tumor necrosis factor alpha-induced protein 8-like protein	Dorsal + Lateral (6)
92	A0A0B4K7D8;Q7K161	A0A0B4K7D8;Q7K161			Dorsal + Lateral (6)
6105	Q9W3N8	Q9W3N8	Nek2		Dorsal + Lateral (6)
6048	Q9W363	Q9W363	mxc		Dorsal + Lateral (6)
6011	Q9W2L2	Q9W2L2	Magi		Dorsal + Lateral (6)
5814	Q9W042;Q8IRF6	Q9W042;Q8IRF6			Dorsal + Lateral (6)
5775	Q9VZL5	Q9VZL5	Ccz1		Dorsal + Lateral (6)
5751	Q9VZD9	Q9VZD9	PMP34		Dorsal + Lateral (6)
5617	X2JKF2;Q9VXT5	X2JKF2;Q9VXT5	CG9213	CWF19-like protein 2 homolog	Dorsal + Lateral (6)
5587	Q9VXK5	Q9VXK5		Putative rRNA methyltransferase	Dorsal + Lateral (6)
5442	Q9VW38	Q9VW38			Dorsal + Lateral (6)
5332	Q9VUU4;Q86NM7	Q9VUU4;Q86NM7	DCP2		Dorsal + Lateral (6)
5296	Q9VUB5	Q9VUB5	upSET		Dorsal + Lateral (6)
5207	Q9VT73	Q9VT73			Dorsal + Lateral (6)
5093	Q9VRT6	Q9VRT6			Dorsal + Lateral (6)
5084	Q9VRP2	Q9VRP2			Dorsal + Lateral (6)
5021	Q9VQY9	Q9VQY9	Psf2	Probable DNA replication complex GINS protein PSF2	Dorsal + Lateral (6)
4970	Q9VQB4	Q9VQB4			Dorsal + Lateral (6)
4960	Q9VQ62	Q9VQ62	Npc2a	Protein NPC2 homolog	Dorsal + Lateral (6)
4893	Q9VPD5	Q9VPD5	mTerf3		Dorsal + Lateral (6)
4877	Q9VP69	Q9VP69			Dorsal + Lateral (6)
4726	Q9VMC3	Q9VMC3	CG9551		Dorsal + Lateral (6)
4710	Q9VM51	Q9VM51			Dorsal + Lateral (6)
4446	X2J6U8;Q9VJ35	X2J6U8;Q9VJ35	ssp3		Dorsal + Lateral (6)
4425	Q9VIX4	Q9VIX4	CG17544-RA	Acyl-coenzyme A oxidase	Dorsal + Lateral (6)
4315	Q9VHN8	Q9VHN8			Dorsal + Lateral (6)
4277	Q9VHE3	Q9VHE3			Dorsal + Lateral (6)
4133	Q9VFS8	Q9VFS8	CG9588	26S proteasome non-ATPase regulatory subunit 9	Dorsal + Lateral (6)
4029	Q9VEH0	Q9VEH0	alt		Dorsal + Lateral (6)
3951	Q9VDK9	Q9VDK9			Dorsal + Lateral (6)
3884	Q9VCR2;Q8T490	Q9VCR2		Aminoacylase-1	Dorsal + Lateral (6)
3881	Q9VCP0	Q9VCP0	EloA	Transcription elongation factor B polypeptide 3	Dorsal + Lateral (6)
3864	Q9VCH1	Q9VCH1	eIF4G2		Dorsal + Lateral (6)
3830	Q9VC64	Q9VC64	ana1		Dorsal + Lateral (6)
3749	Q9VB96;A0A0B4K6I6	Q9VB96;A0A0B4K6I6			Dorsal + Lateral (6)
3737	Q9VB25	Q9VB25	Klp98A	Kinesin-like protein	Dorsal + Lateral (6)
3687	Q9VAK1	Q9VAK1	alph		Dorsal + Lateral (6)
3650	Q9VA38	Q9VA38	wts	Serine/threonine-protein kinase Warts	Dorsal + Lateral (6)
3514	Q9V3V9	Q9V3V9	EndoGI		Dorsal + Lateral (6)
3443	Q9U9P7	Q9U9P7	rdgBbeta	Cytoplasmic phosphatidylinositol transfer protein 1	Dorsal + Lateral (6)
3411	Q9NBD7	Q9NBD7	chb	CLIP-associating protein	Dorsal + Lateral (6)
3317	Q95SI7	Q95SI7			Dorsal + Lateral (6)
3305	Q95RR5	Q95RR5	Pi3K68D		Dorsal + Lateral (6)
3278	Q94546	Q94546	Atu	Another transcription unit protein	Dorsal + Lateral (6)
3108	Q8MSU4	Q8MSU4	Sym	Symplekin	Dorsal + Lateral (6)
3098	Q8MS69	Q8MS69			Dorsal + Lateral (6)
2977	Q9VMX2;Q8IPL4	Q9VMX2;Q8IPL4	l(2)05714		Dorsal + Lateral (6)
2773	Q7KTP4;E1JHT9;Q9VMW2;Q9VMW4	Q7KTP4;E1JHT9;Q9VMW2;Q9VMW4	Rtnl1	Reticulon-like protein	Dorsal + Lateral (6)
2737	Q7KRU8;Q8I0T0	Q7KRU8;Q8I0T0	Fer1HCH	Ferritin	Dorsal + Lateral (6)
2698	Q7KKI0;A1Z8U4	Q7KKI0;A1Z8U4	Cct5		Dorsal + Lateral (6)
2687	Q7KGU6;Q95R82	Q7KGU6;Q95R82			Dorsal + Lateral (6)
2615	Q7K2V1;Q8SX87	Q7K2V1;Q8SX87	Atf6		Dorsal + Lateral (6)
2326	Q4QQB9	Q4QQB9			Dorsal + Lateral (6)
2268	Q24372	Q24372	Lac	Lachesin	Dorsal + Lateral (6)
2204	Q0KHX4	Q0KHX4	CG42259-RA		Dorsal + Lateral (6)
2099	P55828	P55828	RpS20	40S ribosomal protein S20	Dorsal + Lateral (6)
2071	P51406	P51406	bys	Bystin	Dorsal + Lateral (6)
2056	P48612	P48612	pelo	Protein pelota	Dorsal + Lateral (6)
2036	P45594	P45594	tsr	Cofilin/actin-depolymerizing factor homolog	Dorsal + Lateral (6)
1959	P25007;Q7K2I4	P25007	Cyp1	Peptidyl-prolyl cis-trans isomerase	Dorsal + Lateral (6)
1951	P23380;Q8IQG3	P23380	Vha16-1	V-type proton ATPase 16 kDa proteolipid subunit	Dorsal + Lateral (6)
1917	P18930	P18930	mt:ND3	NADH-ubiquinone oxidoreductase chain 3	Dorsal + Lateral (6)
1875	X2JCP8;P10987	X2JCP8;P10987	Act5C	Actin-5C	Dorsal + Lateral (6)
1841	X2JD55;P02843	X2JD55;P02843	Yp1	Vitellogenin-1	Dorsal + Lateral (6)
1827	P00334	P00334	Adh	Alcohol dehydrogenase	Dorsal + Lateral (6)
1741	O46339	O46339	hth	Homeobox protein homothorax	Dorsal + Lateral (6)
1633	M9PH27;Q9GNL3	M9PH27;Q9GNL3	fend	Transmembrane protein fend	Dorsal + Lateral (6)
1624	M9PGZ9;M9PGN9;P22810	M9PGZ9;M9PGN9;P22810	oc	Homeotic protein ocelliless	Dorsal + Lateral (6)
1612	M9PGG8;Q8T415	M9PGG8			Dorsal + Lateral (6)
1489	M9PDB2;Q7KT16;Q2PDR9;Q9VIJ4	M9PDB2;Q7KT16;Q2PDR9;Q9VIJ4	vari		Dorsal + Lateral (6)
1395	M9PBK5;P08570	M9PBK5;P08570	RpLP1	60S acidic ribosomal protein P1	Dorsal + Lateral (6)
1237	M9MRC9;P41092	M9MRC9;P41092	RpL27A	60S ribosomal protein L27a	Dorsal + Lateral (6)
1133	E1JIV0;Q9VCF0	E1JIV0;Q9VCF0	CG5902	Uncharacterized protein CG5902	Dorsal + Lateral (6)
1088	Q9VM55;E1JHA6	Q9VM55;E1JHA6	uif		Dorsal + Lateral (6)
1057	D5A7M1;Q9W1C9	D5A7M1;Q9W1C9	PebIII-RA;PebIII	Ejaculatory bulb-specific protein 3	Dorsal + Lateral (6)
1048	D1Z3A2;Q24407	D1Z3A2;Q24407	ATPsyn-Cf6-RA;ATPsyn-Cf6	ATP synthase-coupling factor 6, mitochondrial	Dorsal + Lateral (6)
985	M9PHG2;C7LAH9	M9PHG2;C7LAH9	Moe		Dorsal + Lateral (6)
982	C7LA75;P11147	C7LA75;P11147	Hsc70-4-RA;Hsc70-4	Heat shock 70 kDa protein cognate 4	Dorsal + Lateral (6)
648	A1Z9J3	A1Z9J3	shot		Dorsal + Lateral (6)
703	A1ZB73	A1ZB73	GstE8		Dorsal + Lateral (6)
706	A1ZBA5	A1ZBA5	mRpS28		Dorsal + Lateral (6)
817	A8DYW4;A0A0S0WGS4	A8DYW4;A0A0S0WGS4	CG34310-RA		Dorsal + Lateral (6)
881	B4F5U4;Q9VYY2	B4F5U4;Q9VYY2	Spase25	Signal peptidase complex subunit 2	Dorsal + Lateral (6)
905	B7YZN6	B7YZN6	CG9865-RA		Dorsal + Lateral (6)
915	M9PG55;Q9VJ42;B7YZX6	M9PG55;Q9VJ42;B7YZX6			Dorsal + Lateral (6)
946	B7Z0I7	B7Z0I7	Snup		Dorsal + Lateral (6)
968	B9A0N7	B9A0N7			Dorsal + Lateral (6)
3449	Q9V392	Q9V392	NimC4		Dorsal + Lateral (6)
3663	Q9VAB9	Q9VAB9	RpS28a		Dorsal + Lateral (6)
520	A0A126GUT1;Q9VGS2	A0A126GUT1;Q9VGS2	Tctp	Translationally-controlled tumor protein homolog	Dorsal + Lateral (6)
701	A1ZB71	A1ZB71	GstE6		Dorsal + Lateral (6)
645	A1Z9I0	A1Z9I0			Dorsal + Lateral (6)
279	A0A0B4KH88;Q9VEV4;Q5BIH5	A0A0B4KH88;Q9VEV4;Q5BIH5	ema		Dorsal + Lateral (6)
328	A0A0B4KI24;Q27415	A0A0B4KI24;Q27415	Nlp	Nucleoplasmin-like protein	Dorsal + Lateral (6)
475	A0A0B4LJ12;A0A0B4LHX6;P08879	A0A0B4LJ12;A0A0B4LHX6;P08879	awd	Nucleoside diphosphate kinase	Dorsal + Lateral (6)
981	C6TP87;P08736	C6TP87;P08736	Ef1alpha48D-RA;Ef1alpha48D	Elongation factor 1-alpha;Elongation factor 1-alpha 1	Dorsal + Lateral (6)
388	A0A0B4LFT7;P13002;A0A0B4K7F6	A0A0B4LFT7;P13002	grh	Protein grainyhead	Dorsal + Lateral (6)
318	A0A0B4KHX9;Q9V9V9	A0A0B4KHX9;Q9V9V9	CG11539	N-acetyltransferase 9-like protein	Dorsal + Lateral (6)
167	Q9VI61;A0A0B4KF76;Q8INT1;A0A0B4KFQ4;E1JJ75;E1JJ76;A8JQU7;Q7KSZ0;A0A0B4KFD2;Q9VI63;A0A0B4KGB4;A8JQU6;A0A0B4KGP1	Q9VI61;A0A0B4KF76;Q8INT1;A0A0B4KFQ4;E1JJ75;E1JJ76;A8JQU7;Q7KSZ0;A0A0B4KFD2;Q9VI63;A0A0B4KGB4;A8JQU6;A0A0B4KGP1	Alh		Dorsal + Lateral (6)
3414	Q9NFU0;B3LF78	Q9NFU0;B3LF78	Fmr1	Fragile X mental retardation syndrome-related protein 1	Dorsal + Lateral (6)
3394	Q9I7M5	Q9I7M5			Dorsal + Lateral (6)
2087	P54356	P54356	tsg	Protein twisted gastrulation	Dorsal + Lateral (6)
1872	P10090	P10090	w	Protein white	Dorsal + Lateral (6)
1622	M9PJ04;Q2PE29;M9PGL8;Q7KVX6	M9PJ04;Q2PE29;M9PGL8;Q7KVX6			Dorsal + Lateral (6)
1187	Q9W3H6;Q7KVT3;X2JCZ1;M9PJD0;E2QD98;Q6NR03;Q0KHU9;X2JIZ6;Q9W3H8;Q9W3H7;M9NG38;M9NEZ2	Q9W3H6;Q7KVT3;X2JCZ1;M9PJD0;E2QD98;Q6NR03;Q0KHU9;X2JIZ6;Q9W3H8;Q9W3H7;M9NG38;M9NEZ2	sdt		Dorsal + Lateral (6)
3501	Q9V3R8	Q9V3R8	heix	UbiA prenyltransferase domain-containing protein 1 homolog	Dorsal + Lateral (6)
5412	Q9VVS3	Q9VVS3			Dorsal + Lateral (6)
423	A0A0B4LGK1;P14083	A0A0B4LGK1;P14083	lov	Protein jim lovell	Dorsal + Lateral (6)
1439	M9PCF1;Q9VQH2	M9PCF1;Q9VQH2	Duox	Dual oxidase	Dorsal + Ventral Tl10B (7)
1242	M9MRG2	M9MRG2			Dorsal + Ventral Tl10B (7)
3120	Q8MUJ1	Q8MUJ1	egr		Dorsal + Ventral Tl10B (7)
1868	P09089	P09089	zen	Protein zerknuellt 1	Dorsal + Ventral Tl10B (7)
2938	Q8INE2	Q8INE2	CG42726-RA		Dorsal + Ventral Tl10B (7)
68	A0A0B4K6R3;Q8IH24	A0A0B4K6R3;Q8IH24	MED31	Mediator of RNA polymerase II transcription subunit 31	Dorsal + Ventral Tl10B (7)
5978	Q9W258	Q9W258	babos		Dorsal + Ventral Tl10B (7)
1116	E1JID8;Q9V3L1	E1JID8;Q9V3L1	sfl	Bifunctional heparan sulfate N-deacetylase/N-sulfotransferase;Heparan sulfate N-deacetylase;Heparan sulfate N-sulfotransferase	Dorsal + Ventral Tl10B (7)
5808	Q9W023	Q9W023	CG1317-RB		Dorsal + Ventral Tl10B (7)
684	A1ZAQ9	A1ZAQ9	Gbp		Dorsal + Ventral Tl10B (7)
1153	E1JJK9;E1JJK7;X2JF93;P43125;E1JJK8;E1JJK6;M9PJM8;M9PEJ5	E1JJK9;E1JJK7;X2JF93;P43125;E1JJK8;E1JJK6;M9PJM8;M9PEJ5	rdgB	Protein retinal degeneration B	Dorsal + Ventral Tl10B (7)
2514	Q7JY99	Q7JY99			Dorsal + Ventral Tl10B (7)
2536	Q7JZY1	Q7JZY1			Dorsal + Ventral Tl10B (7)
2760	Q7KTA1	Q7KTA1	NimB2		Dorsal + Ventral Tl10B (7)
4673	Q9VLR4;Q8IPG2	Q9VLR4;Q8IPG2	CG8372-RB		Dorsal + Ventral Tl10B (7)
4907	Q9VPI8	Q9VPI8	net		Dorsal + Ventral Tl10B (7)
4961	Q9VQ75	Q9VQ75			Dorsal + Ventral Tl10B (7)
5519	Q9VWU1	Q9VWU1	psh	Serine protease persephone	Dorsal + Ventral Tl10B (7)
5706	Q9VYT6	Q9VYT6	p24-1		Dorsal + Ventral Tl10B (7)
1084	E1JH67;Q9V751;P45884	E1JH67;Q9V751;P45884	AttB;AttA	Attacin-B;Attacin-A	Dorsal + Ventral Tl10B (7)
5683	Q9VYJ5	Q9VYJ5	CG12717-RA		Dorsal + Ventral Tl10B (7)
5174	Q9VST8	Q9VST8			Dorsal + Ventral Tl10B (7)
2504	Q7JXE1	Q7JXE1			Dorsal + Ventral Tl10B (7)
6250	Q9W5E2	Q9W5E2	EG:115C2.8		Dorsal + Ventral Tl10B (7)
6206	Q9W4P5	Q9W4P5	VhaAC39-1	V-type proton ATPase subunit d 1	Dorsal + Ventral Tl10B (7)
6150	Q9W413	Q9W413	CG15896-RA		Dorsal + Ventral Tl10B (7)
6126	Q9W3V3	Q9W3V3			Dorsal + Ventral Tl10B (7)
6110	Q9W3R6	Q9W3R6	Dok		Dorsal + Ventral Tl10B (7)
6036	Q9W314	Q9W314	Ser7		Dorsal + Ventral Tl10B (7)
6285	Q9XZ10;Q8IML5	Q9XZ10;Q8IML5	Vha100-1	V-type proton ATPase subunit a	Dorsal + Ventral Tl10B (7)
5940	Q9W1M9	Q9W1M9	Rrp4		Dorsal + Ventral Tl10B (7)
5920	Q9W1F5	Q9W1F5			Dorsal + Ventral Tl10B (7)
5841	Q9W0G1;Q8IRH4	Q9W0G1;Q8IRH4	Ptp61F	Tyrosine-protein phosphatase non-receptor type 61F;Protein-tyrosine-phosphatase	Dorsal + Ventral Tl10B (7)
5827	Q9W0B2;A0A0S0WGR0	Q9W0B2;A0A0S0WGR0			Dorsal + Ventral Tl10B (7)
5799	Q9VZX9;Q7KSG0;P50245	Q9VZX9	CG9977-RA	Adenosylhomocysteinase	Dorsal + Ventral Tl10B (7)
5743	Q9VZ62	Q9VZ62	feo		Dorsal + Ventral Tl10B (7)
5702	Q9VYT1	Q9VYT1			Dorsal + Ventral Tl10B (7)
5686	Q9VYK6;A4V4D2;Q9VYK5	Q9VYK6;A4V4D2;Q9VYK5	Tomosyn		Dorsal + Ventral Tl10B (7)
5681	Q9VYJ1	Q9VYJ1	CG3775-RA		Dorsal + Ventral Tl10B (7)
5635	Q9VXZ0	Q9VXZ0	ND-B18		Dorsal + Ventral Tl10B (7)
5581	Q9VXH4	Q9VXH4			Dorsal + Ventral Tl10B (7)
5490	Q9VWI3	Q9VWI3	mRpS14		Dorsal + Ventral Tl10B (7)
5362	Q9VV76	Q9VV76	Syx8		Dorsal + Ventral Tl10B (7)
5334	Q9VUU8;Q9VUU7	Q9VUU8;Q9VUU7	CG15715-RA		Dorsal + Ventral Tl10B (7)
5325	Q9VUR0	Q9VUR0	UFSP2	Probable Ufm1-specific protease 2	Dorsal + Ventral Tl10B (7)
5258	Q9VTX1	Q9VTX1	CG32104-RB		Dorsal + Ventral Tl10B (7)
5229	Q9VTK2	Q9VTK2	rt	Protein O-mannosyltransferase 1	Dorsal + Ventral Tl10B (7)
5198	Q9VT29	Q9VT29			Dorsal + Ventral Tl10B (7)
5151	Q9VSJ8	Q9VSJ8	exo70	Exocyst complex component 7	Dorsal + Ventral Tl10B (7)
5115	Q9VS44	Q9VS44			Dorsal + Ventral Tl10B (7)
5077	Q9VRL2	Q9VRL2	membrin	Probable Golgi SNAP receptor complex member 2	Dorsal + Ventral Tl10B (7)
5028	Q9VR05	Q9VR05			Dorsal + Ventral Tl10B (7)
5006	Q9VQR3;REV__A1Z7X7	Q9VQR3	PIF1	ATP-dependent DNA helicase PIF1	Dorsal + Ventral Tl10B (7)
4916	Q9VPM0	Q9VPM0	Rpp30		Dorsal + Ventral Tl10B (7)
4865	Q9VP18	Q9VP18	VhaM9.7-b		Dorsal + Ventral Tl10B (7)
4780	Q9VMY3	Q9VMY3	CG12581-RA		Dorsal + Ventral Tl10B (7)
4724	Q9VMB6	Q9VMB6	Ent2		Dorsal + Ventral Tl10B (7)
4697	Q9VLY9;Q8IPH5;Q8IPH4;Q9VLZ0	Q9VLY9;Q8IPH5;Q8IPH4;Q9VLZ0	Tep2		Dorsal + Ventral Tl10B (7)
4549	Q9VKE7	Q9VKE7	CG42486-RA		Dorsal + Ventral Tl10B (7)
4499	X2J5X6;Q9VJY9;X2JAB1;Q8IP72	X2J5X6;Q9VJY9;X2JAB1;Q8IP72	loqs		Dorsal + Ventral Tl10B (7)
4492	Q9VJV8	Q9VJV8	DNApol-gamma35		Dorsal + Ventral Tl10B (7)
4426	Q9VIX7;Q8INW9	Q9VIX7;Q8INW9	fon		Dorsal + Ventral Tl10B (7)
4421	Q9VIW6	Q9VIW6	Rab9		Dorsal + Ventral Tl10B (7)
4388	Q9VIK0	Q9VIK0	CG9319-RA		Dorsal + Ventral Tl10B (7)
4385	X2J9A5;Q9VII9	X2J9A5;Q9VII9			Dorsal + Ventral Tl10B (7)
4214	Q9VGS3	Q9VGS3	SdhC		Dorsal + Ventral Tl10B (7)
4184	Q9VGF3	Q9VGF3			Dorsal + Ventral Tl10B (7)
3971	Q9VDT6	Q9VDT6	CG11447	rRNA methyltransferase 2, mitochondrial	Dorsal + Ventral Tl10B (7)
3927	Q9VDC3	Q9VDC3	AP-2sigma		Dorsal + Ventral Tl10B (7)
3831	Q9VC65	Q9VC65			Dorsal + Ventral Tl10B (7)
3746	Q9VB73	Q9VB73	CG5880-RA	Palmitoyltransferase	Dorsal + Ventral Tl10B (7)
3690	Q9VAL1	Q9VAL1	CG2006-RA		Dorsal + Ventral Tl10B (7)
3651	Q9VA41;Q8IMH5	Q9VA41;Q8IMH5	Npc2h		Dorsal + Ventral Tl10B (7)
3603	Q9V785	Q9V785	pcs	SH3 domain-binding protein 5 homolog	Dorsal + Ventral Tl10B (7)
3486	Q9V3I2	Q9V3I2	Rab5		Dorsal + Ventral Tl10B (7)
3471	Q9V3E5	Q9V3E5	Tsp66E	Tetraspanin	Dorsal + Ventral Tl10B (7)
3380	Q9GSR1	Q9GSR1	mus205	DNA polymerase	Dorsal + Ventral Tl10B (7)
3353	Q960W0	Q960W0			Dorsal + Ventral Tl10B (7)
3335	Q95U30	Q95U30	alpha-Est5		Dorsal + Ventral Tl10B (7)
3304	Q95RR1;M9PD88	Q95RR1;M9PD88	Atox1		Dorsal + Ventral Tl10B (7)
3135	Q8SWS2;X2JEY3;Q9VYM7	Q8SWS2;X2JEY3;Q9VYM7			Dorsal + Ventral Tl10B (7)
3089	Q8MRC9	Q8MRC9	pgant9	Putative polypeptide N-acetylgalactosaminyltransferase 9	Dorsal + Ventral Tl10B (7)
3004	Q8IQH0;Q94887	Q8IQH0;Q94887	Nrx-IV	Neurexin-4	Dorsal + Ventral Tl10B (7)
3003	Q8IQF1	Q8IQF1	Mocs1	'Molybdenum cofactor biosynthesis protein 1;Cyclic pyranopterin monophosphate synthase;Cyclic pyranopterin monophosphate synthase...' <Preview truncated at 128 characters>	Dorsal + Ventral Tl10B (7)
3000	Q8IQC6	Q8IQC6			Dorsal + Ventral Tl10B (7)
2960	Q8IP67;Q9V3D1;X2JAD3	Q8IP67;Q9V3D1;X2JAD3	BG:DS00797.2		Dorsal + Ventral Tl10B (7)
2943	Q8ING0	Q8ING0			Dorsal + Ventral Tl10B (7)
2933	Q8IN78	Q8IN78	Tim22	Mitochondrial import inner membrane translocase subunit Tim22	Dorsal + Ventral Tl10B (7)
2908	Q8IML3;Q8IML4;Q6NLA3	Q8IML3;Q8IML4;Q6NLA3	Vha100-1	V-type proton ATPase subunit a	Dorsal + Ventral Tl10B (7)
2880	Q86NX3	Q86NX3			Dorsal + Ventral Tl10B (7)
2863	Q86BA5;Q9I7K5	Q86BA5;Q9I7K5	p24-2;eca	Transmembrane emp24 domain-containing protein eca	Dorsal + Ventral Tl10B (7)
2836	Q7PLI0	Q7PLI0	p120ctn		Dorsal + Ventral Tl10B (7)
2825	Q7KW39	Q7KW39	CG17896	Probable methylmalonate-semialdehyde dehydrogenase [acylating], mitochondrial	Dorsal + Ventral Tl10B (7)
2807	Q7KVA1	Q7KVA1	oxt	Xylosyltransferase oxt	Dorsal + Ventral Tl10B (7)
2772	Q95SI0;Q8IPK9;Q7KTP1;Q9VMT1	Q95SI0;Q8IPK9;Q7KTP1;Q9VMT1	tkv	Receptor protein serine/threonine kinase	Dorsal + Ventral Tl10B (7)
2736	Q961V3;Q7KRU0;A0A0B4KHW7	Q961V3;Q7KRU0;A0A0B4KHW7			Dorsal + Ventral Tl10B (7)
2716	Q7KN04	Q7KN04	fat-spondin		Dorsal + Ventral Tl10B (7)
2527	Q7JZD5	Q7JZD5	Dip3		Dorsal + Ventral Tl10B (7)
2432	Q7JR96	Q7JR96	Snx16		Dorsal + Ventral Tl10B (7)
2426	Q7JR49	Q7JR49	VhaAC45		Dorsal + Ventral Tl10B (7)
2280	X2JFU0;Q24564	X2JFU0;Q24564	Mer	Moesin/ezrin/radixin homolog 2	Dorsal + Ventral Tl10B (7)
2158	Q0E8E7	Q0E8E7			Dorsal + Ventral Tl10B (7)
2156	Q0E8E1;Q9I7R2	Q0E8E1;Q9I7R2	CG32158-RE		Dorsal + Ventral Tl10B (7)
2062	P49846	P49846	Taf5	Transcription initiation factor TFIID subunit 5	Dorsal + Ventral Tl10B (7)
1608	M9PGF6;X2JCI0;M9PJ19;X2JAF4;P34082	M9PGF6;X2JCI0;M9PJ19;X2JAF4;P34082	Fas2	Fasciclin-2	Dorsal + Ventral Tl10B (7)
1587	M9PFY2;Q9VVF4;Q8IQQ8	M9PFY2;Q9VVF4;Q8IQQ8	CG6479-RA;CG6479-RB		Dorsal + Ventral Tl10B (7)
1558	M9PHQ1;M9PFD0;Q9VRG4	M9PHQ1;M9PFD0;Q9VRG4			Dorsal + Ventral Tl10B (7)
1554	M9PF62;P48423	M9PF62;P48423	RasGAP1	GTPase-activating protein	Dorsal + Ventral Tl10B (7)
1391	M9PBH9;Q9W0E8	M9PBH9;Q9W0E8	CG12084	Protein zer-1 homolog	Dorsal + Ventral Tl10B (7)
1374	M9PB60;M9PCT2;Q9VM32;M9PF01;M9PCF0;M9PC92;Q9VM31;M9PC95;M9PB59;Q8IPI3	M9PB60;M9PCT2;Q9VM32;M9PF01;M9PCF0;M9PC92;Q9VM31;M9PC95;M9PB59;Q8IPI3	Ndae1	Anion exchange protein	Dorsal + Ventral Tl10B (7)
1357	M9NFR3;P14785	M9NFR3;P14785	CycA	G2/mitotic-specific cyclin-A	Dorsal + Ventral Tl10B (7)
1339	M9NF00;Q9U4H5	M9NF00;Q9U4H5	amx	TM2 domain-containing protein almondex	Dorsal + Ventral Tl10B (7)
1335	M9NEV7;Q9VII1	M9NEV7;Q9VII1	CG9336-RA		Dorsal + Ventral Tl10B (7)
1289	M9ND16;Q7KU24;M9PEB2	M9ND16;Q7KU24;M9PEB2	Chd1	Chromodomain-helicase-DNA-binding protein 1	Dorsal + Ventral Tl10B (7)
1211	H0RNC9;Q9VMH7	H0RNC9;Q9VMH7	CG9154-RA;CG9154	Protein-lysine N-methyltransferase CG9154	Dorsal + Ventral Tl10B (7)
1179	E2QCZ3;E2QCZ4	E2QCZ3	CG7705-RA		Dorsal + Ventral Tl10B (7)
1151	E1JJG4;Q9W395	E1JJG4;Q9W395	APC4		Dorsal + Ventral Tl10B (7)
1082	Q7JUX2;E1JH43	Q7JUX2;E1JH43	Den1		Dorsal + Ventral Tl10B (7)
1052	D3DMM4;Q86B97;Q9VGE9;Q86B96;Q86B95;Q9VGF0;Q86B94	D3DMM4;Q86B97;Q9VGE9;Q86B96;Q86B95;Q9VGF0;Q86B94	mfas-RJ;mfas		Dorsal + Ventral Tl10B (7)
825	L0MLL1;Q8IMA6;Q7KQN3;A8DZ26;Q8IMA3;Q8IMA5;Q8IMA7;Q8SXV3	L0MLL1;Q8IMA6;Q7KQN3;A8DZ26			Dorsal + Ventral Tl10B (7)
758	A4V287;M9PG42;P39413	A4V287;M9PG42;P39413	Aef1	Adult enhancer factor 1	Dorsal + Ventral Tl10B (7)
747	A4V0R4;M9NDQ2;P54733	A4V0R4;M9NDQ2;P54733	CycE	G1/S-specific cyclin-E	Dorsal + Ventral Tl10B (7)
662	A1Z9W2	A1Z9W2	CG33506-RA		Dorsal + Ventral Tl10B (7)
601	A1Z830;A1Z831	A1Z830;A1Z831			Dorsal + Ventral Tl10B (7)
523	Q9VEZ6;A0A126GUV0	Q9VEZ6;A0A126GUV0			Dorsal + Ventral Tl10B (7)
405	A0A0B4LG95;Q7K274;A0A0B4LGC6;Q8MLS7	A0A0B4LG95;Q7K274;A0A0B4LGC6;Q8MLS7	l(2)k09913		Dorsal + Ventral Tl10B (7)
191	A0A0B4KFI0;Q9VHN3	A0A0B4KFI0;Q9VHN3	CG11755	Cysteine-rich DPF motif domain-containing protein 1	Dorsal + Ventral Tl10B (7)
160	A0A0B4KEZ9;Q9V8P9	A0A0B4KEZ9;Q9V8P9	Topors	E3 ubiquitin-protein ligase Topors	Dorsal + Ventral Tl10B (7)
111	A0A0B4K7X5;A0A0B4LFW5;Q9W2J6;A0A0B4LG72;A0A0B4LG29;E1JGQ3	A0A0B4K7X5;A0A0B4LFW5;Q9W2J6;A0A0B4LG72;A0A0B4LG29;E1JGQ3	Glycogenin		Dorsal + Ventral Tl10B (7)
29	A0A0B4JDE8;Q9VF71	A0A0B4JDE8;Q9VF71	CG6136	Copper homeostasis protein cutC homolog	Dorsal + Ventral Tl10B (7)
364	A0A0B4LFA2;A1Z995	A0A0B4LFA2;A1Z995	seq		Dorsal + Ventral Tl10B (7)
4675	Q9VLR8	Q9VLR8	SLC5A11		Dorsal + Ventral Tl10B (7)
843	A8JNU6	A8JNU6	Nc73EF		Dorsal + Ventral Tl10B (7)
7	A0A0B4JCT8;Q9V780	A0A0B4JCT8;Q9V780	Lap1	Protein lap1	Dorsal + Ventral Tl10B (7)
3022	Q8IQZ4	Q8IQZ4			Dorsal + Ventral Tl10B (7)
52	Q9VGD1;A0A0B4K6G0	Q9VGD1;A0A0B4K6G0			Dorsal + Ventral spn27A (8)
5455	Q9VW68	Q9VW68			Dorsal + Ventral spn27A (8)
4356	Q9VI65	Q9VI65			Dorsal + Ventral spn27A (8)
754	A4V1Q1;A4V1Q0;M9PF25;Q24207;Q6NN06	A4V1Q1;A4V1Q0;M9PF25;Q24207;Q6NN06	bol	Protein boule	Dorsal + Ventral spn27A (8)
900	B7YZJ4	B7YZJ4			Dorsal + Ventral spn27A (8)
2435	Q7JRC3	Q7JRC3	Jheh1		Dorsal + Ventral spn27A (8)
2822	Q7KVW2	Q7KVW2	l(1)G0045		Dorsal + Ventral spn27A (8)
2944	Q8INH5	Q8INH5	CG32473-RB		Dorsal + Ventral spn27A (8)
3562	Q9V492	Q9V492	CG11077	Mpv17-like protein	Dorsal + Ventral spn27A (8)
4238	Q9VH18	Q9VH18			Dorsal + Ventral spn27A (8)
4265	Q9VHB3	Q9VHB3	CG16790	U6 snRNA phosphodiesterase	Dorsal + Ventral spn27A (8)
96	A0A0B4K7H0;Q7KN74	A0A0B4K7H0;Q7KN74	l(2)k14710		Dorsal + Ventral spn27A (8)
133	A0A0B4KEN1;A1Z7N4;A0A0B4KEF7;A0A0B4LEX2	A0A0B4KEN1;A1Z7N4;A0A0B4KEF7;A0A0B4LEX2			Dorsal + Ventral spn27A (8)
162	Q9W214;A0A0B4KF28	Q9W214;A0A0B4KF28	Ppa;ppa		Dorsal + Ventral spn27A (8)
218	Q7KSK8;Q9V3X1;A0A0B4KFW1;A0A0B4KG03;A8JQZ7;A0A0B4KGK9;A8JQZ8;Q6NLJ7	Q7KSK8;Q9V3X1;A0A0B4KFW1;A0A0B4KG03;A8JQZ7;A0A0B4KGK9	f-cup		Dorsal + Ventral spn27A (8)
334	Q8IMK5;C6TP98;A0A0B4KI57;A0A0B4K7R2;Q9VAI0	Q8IMK5;C6TP98;A0A0B4KI57;A0A0B4K7R2;Q9VAI0	CG1969-RB;CG1969	Probable glucosamine 6-phosphate N-acetyltransferase	Dorsal + Ventral spn27A (8)
424	A0A0B4LGL0;A1ZA47;A0A126GUN6;A0A0B4KEW3;C1C3E7;G3JX29;G3JX30;G3JX27;G3JX28;A0A0B4KFR8;A0A0B4KER6;G3JX25;G3JX31;G3JX32;G3JX33	A0A0B4LGL0;A1ZA47;A0A126GUN6;A0A0B4KEW3;C1C3E7;G3JX29;G3JX30;G3JX27;G3JX28;A0A0B4KFR8;A0A0B4KER6;G3JX25;G3JX31;G3JX32	Zasp52	PDZ and LIM domain protein Zasp	Dorsal + Ventral spn27A (8)
521	A0A126GUU0;Q9V3G6	A0A126GUU0;Q9V3G6	Not10	CCR4-NOT transcription complex subunit 10	Dorsal + Ventral spn27A (8)
608	Q8T972;A1Z8B5	Q8T972;A1Z8B5	CG7220-RB		Dorsal + Ventral spn27A (8)
664	A1ZA03	A1ZA03	Pms2		Dorsal + Ventral spn27A (8)
683	A1ZAP1;A0A0B4LFQ7	A1ZAP1;A0A0B4LFQ7	CG9646-RA		Dorsal + Ventral spn27A (8)
704	A1ZB84;REV__A1ZB84	A1ZB84	CG12263-RA		Dorsal + Ventral spn27A (8)
735	A2VEI2	A2VEI2	CG4495	Calcium uptake protein 1 homolog, mitochondrial	Dorsal + Ventral spn27A (8)
739	A4UZL5;P41043	A4UZL5;P41043	GstS1	Glutathione S-transferase S1	Dorsal + Ventral spn27A (8)
939	B7Z0E0;Q8IQA7;Q9VSI6;Q7KUB0	B7Z0E0;Q8IQA7;Q9VSI6;Q7KUB0	Idh	Isocitrate dehydrogenase [NADP]	Dorsal + Ventral spn27A (8)
979	C6SUW3;P55935;Q95RG1	C6SUW3;P55935;Q95RG1	RpS9	40S ribosomal protein S9	Dorsal + Ventral spn27A (8)
1055	D3PFH9;E1JIW2;Q6NN85	D3PFH9;E1JIW2;Q6NN85	ssh	Protein phosphatase Slingshot	Dorsal + Ventral spn27A (8)
1224	Q9V4B2;H9XVM3;L0MN60	Q9V4B2;H9XVM3	Arl4		Dorsal + Ventral spn27A (8)
1234	L7ED64;L7EEF9;Q8MQI6	L7ED64;L7EEF9;Q8MQI6	CG40228	Transcription elongation factor 1 homolog	Dorsal + Ventral spn27A (8)
1244	M9MRH0;Q9VKU8;M9PFI9;Q9VKV0	M9MRH0;Q9VKU8	RluA-2		Dorsal + Ventral spn27A (8)
1347	M9NF69;Q23989	M9NF69;Q23989	qua	Villin-like protein quail	Dorsal + Ventral spn27A (8)
1394	M9PBK1;Q6WV16	M9PBK1;Q6WV16	pgant6	Polypeptide N-acetylgalactosaminyltransferase;N-acetylgalactosaminyltransferase 6	Dorsal + Ventral spn27A (8)
1450	M9PCL4;Q9VMV6	M9PCL4;Q9VMV6	CG3887	SelT-like protein	Dorsal + Ventral spn27A (8)
1479	M9PG27;M9PD54;Q9VP76;M9PID8;M9NG95	M9PG27;M9PD54;Q9VP76;M9PID8;M9NG95	Ac78C		Dorsal + Ventral spn27A (8)
1494	M9PDI3;P09085	M9PDI3;P09085	cad	Homeotic protein caudal	Dorsal + Ventral spn27A (8)
1501	M9PDM5;P25157	M9PDM5;P25157	cta	Guanine nucleotide-binding protein subunit alpha homolog	Dorsal + Ventral spn27A (8)
1544	M9PEY7;M9PER1;M9PHS3;Q9VSF0	M9PEY7;M9PER1;M9PHS3;Q9VSF0	Atg18a		Dorsal + Ventral spn27A (8)
1562	M9PFF9;M9PFG3	M9PFF9;M9PFG3	tral		Dorsal + Ventral spn27A (8)
1586	M9PFY1;Q9VJN5	M9PFY1;Q9VJN5	wek	Zinc finger protein weckle	Dorsal + Ventral spn27A (8)
1693	O15971	O15971	Rab10		Dorsal + Ventral spn27A (8)
1703	O18332	O18332	Rab1		Dorsal + Ventral spn27A (8)
1719	O44386	O44386	scb	Integrin alpha-PS3;Integrin alpha-PS3 heavy chain;Integrin alpha-PS3 light chain	Dorsal + Ventral spn27A (8)
1728	X2JCE0;O46072	X2JCE0;O46072	kz	Probable ATP-dependent RNA helicase kurz	Dorsal + Ventral spn27A (8)
1748	O61491	O61491	Flo-1	Flotillin-1	Dorsal + Ventral spn27A (8)
1779	O76906	O76906	crm	Protein cramped	Dorsal + Ventral spn27A (8)
1866	P08646	P08646	Ras85D	Ras-like protein 1	Dorsal + Ventral spn27A (8)
1902	P16912	P16912	Pka-C3	Protein kinase DC2	Dorsal + Ventral spn27A (8)
2022	P41093	P41093	RpL18A	60S ribosomal protein L18a	Dorsal + Ventral spn27A (8)
2122	P91682	P91682	smo	Protein smoothened	Dorsal + Ventral spn27A (8)
2228	Q23985	Q23985	dx	Protein deltex	Dorsal + Ventral spn27A (8)
2312	Q32KD3;Q7KSW1;Q494I1;A0A0B4KGS8;Q9VHW9;A0A0B4KGF6	Q32KD3;Q7KSW1;Q494I1;A0A0B4KGS8;Q9VHW9;A0A0B4KGF6			Dorsal + Ventral spn27A (8)
2339	Q4V6A8	Q4V6A8	Atg10		Dorsal + Ventral spn27A (8)
2392	Q6NLJ9	Q6NLJ9			Dorsal + Ventral spn27A (8)
2402	Q6NR22	Q6NR22			Dorsal + Ventral spn27A (8)
2481	Q7JWD3	Q7JWD3	CG1598	ATPase ASNA1 homolog	Dorsal + Ventral spn27A (8)
2492	Q7JWU9	Q7JWU9			Dorsal + Ventral spn27A (8)
2563	Q7K110	Q7K110	OstDelta		Dorsal + Ventral spn27A (8)
2581	Q7K1M4	Q7K1M4			Dorsal + Ventral spn27A (8)
2664	Q7K549	Q7K549	mlt		Dorsal + Ventral spn27A (8)
2667	Q7K566	Q7K566	Bmcp		Dorsal + Ventral spn27A (8)
2701	Q7KLI1;Q9U8R4	Q7KLI1;Q9U8R4	Dark		Dorsal + Ventral spn27A (8)
2846	Q7YU01;A8JRC4;A8JRC7;A0A0B4KH38;Q9VBN2;Q7YTZ6;Q86B77;A0A0B4KGZ9;Q6NN57	Q7YU01;A8JRC4;A8JRC7;A0A0B4KH38;Q9VBN2;Q7YTZ6;Q86B77;A0A0B4KGZ9	LpR2		Dorsal + Ventral spn27A (8)
2887	Q8I0A1	Q8I0A1	SNF4Agamma		Dorsal + Ventral spn27A (8)
3030	Q9VYT2;Q8IR85	Q9VYT2;Q8IR85			Dorsal + Ventral spn27A (8)
3037	Q9VZQ9;Q8IRD5	Q9VZQ9;Q8IRD5	Strip		Dorsal + Ventral spn27A (8)
3073	Q8MLW4	Q8MLW4			Dorsal + Ventral spn27A (8)
3092	Q8MRQ4	Q8MRQ4	CG8135	LMBR1 domain-containing protein 2 homolog	Dorsal + Ventral spn27A (8)
3179	Q8SXX1	Q8SXX1	PIP4K		Dorsal + Ventral spn27A (8)
3213	Q8SZB7	Q8SZB7			Dorsal + Ventral spn27A (8)
3338	Q95U54	Q95U54	Mms19		Dorsal + Ventral spn27A (8)
3467	Q9V3D4;D4G7B1	Q9V3D4;D4G7B1	Idgf2	Chitinase-like protein Idgf2	Dorsal + Ventral spn27A (8)
3493	Q9V3N4	Q9V3N4	htt		Dorsal + Ventral spn27A (8)
3508	Q9V3U1;M9PGK1	Q9V3U1;M9PGK1	EG:103E12.3		Dorsal + Ventral spn27A (8)
3582	Q9V535	Q9V535	tsu	RNA-binding protein 8A	Dorsal + Ventral spn27A (8)
3658	Q9VA95	Q9VA95	Bet5		Dorsal + Ventral spn27A (8)
3693	Q9VAM6	Q9VAM6	CG1458	CDGSH iron-sulfur domain-containing protein 2 homolog	Dorsal + Ventral spn27A (8)
3742	Q9VB52	Q9VB52	l(3)mbt		Dorsal + Ventral spn27A (8)
3788	Q9VBU8	Q9VBU8	Nup37		Dorsal + Ventral spn27A (8)
3859	Q9VCF4	Q9VCF4	AP-1sigma		Dorsal + Ventral spn27A (8)
3928	Q9VDC8	Q9VDC8	CG3337-RA		Dorsal + Ventral spn27A (8)
4056	Q9VEU2	Q9VEU2	Der-2		Dorsal + Ventral spn27A (8)
4071	Q9VF04	Q9VF04	Rbf2		Dorsal + Ventral spn27A (8)
4096	Q9VF98	Q9VF98	l(3)neo43		Dorsal + Ventral spn27A (8)
4150	Q9VG08	Q9VG08	yellow-f2		Dorsal + Ventral spn27A (8)
4203	Q9VGP0	Q9VGP0		D-tyrosyl-tRNA(Tyr) deacylase	Dorsal + Ventral spn27A (8)
4211	Q9VGR0	Q9VGR0			Dorsal + Ventral spn27A (8)
4264	Q9VHB1;A0A0B4KFZ7;Q9VHB2	Q9VHB1;A0A0B4KFZ7			Dorsal + Ventral spn27A (8)
4307	Q9VHM2	Q9VHM2	CG8202	UPF0505 protein CG8202	Dorsal + Ventral spn27A (8)
4368	Q9VID7	Q9VID7	l(2)k14505		Dorsal + Ventral spn27A (8)
4383	Q9VIH3	Q9VIH3	Mtp		Dorsal + Ventral spn27A (8)
4443	Q9VJ30;Q7KT38;X2J946	Q9VJ30;Q7KT38;X2J946	Nak		Dorsal + Ventral spn27A (8)
4579	Q9VKQ7	Q9VKQ7			Dorsal + Ventral spn27A (8)
4626	Q9VL66	Q9VL66	CG4592-RA		Dorsal + Ventral spn27A (8)
4686	Q9VLT7	Q9VLT7	RpL36A		Dorsal + Ventral spn27A (8)
4734	Q9VMH2	Q9VMH2	Arpc4		Dorsal + Ventral spn27A (8)
4777	Q9VMX4	Q9VMX4	Scox		Dorsal + Ventral spn27A (8)
4786	Q9VN18	Q9VN18			Dorsal + Ventral spn27A (8)
4820	Q9VNE9;A0A0B4KFM7	Q9VNE9	RpL13A	60S ribosomal protein L13a	Dorsal + Ventral spn27A (8)
4845	Q9VNR7;A8E6R2	Q9VNR7;A8E6R2			Dorsal + Ventral spn27A (8)
4883	Q9VPA9	Q9VPA9			Dorsal + Ventral spn27A (8)
4951	Q9VQ27	Q9VQ27			Dorsal + Ventral spn27A (8)
4958	Q9VQ60	Q9VQ60			Dorsal + Ventral spn27A (8)
5085	Q9VRP3	Q9VRP3	Txl		Dorsal + Ventral spn27A (8)
5129	T2GGE0;Q9VSA4	T2GGE0;Q9VSA4	CG7457-RA;CG7457	Tonsoku-like protein	Dorsal + Ventral spn27A (8)
5157	Q9VSL2	Q9VSL2	GstO3		Dorsal + Ventral spn27A (8)
5203	Q9VT57	Q9VT57	Cdk8	Cyclin-dependent kinase 8	Dorsal + Ventral spn27A (8)
5254	Q9VTV4	Q9VTV4			Dorsal + Ventral spn27A (8)
5280	Q9VU43	Q9VU43	SRm160		Dorsal + Ventral spn27A (8)
5297	Q9VUB7	Q9VUB7	ptip		Dorsal + Ventral spn27A (8)
5353	Q9VV49	Q9VV49			Dorsal + Ventral spn27A (8)
5436	X2JGV8;Q9VW12	X2JGV8;Q9VW12	CG9231	UPF0389 protein CG9231	Dorsal + Ventral spn27A (8)
5513	Q9VWR8	Q9VWR8	CG6659	C-mannosyltransferase dpy-19 homolog	Dorsal + Ventral spn27A (8)
5577	Q9VXG8	Q9VXG8	mei-41	Serine/threonine-protein kinase ATR	Dorsal + Ventral spn27A (8)
5688	Q9VYK8	Q9VYK8	Aven		Dorsal + Ventral spn27A (8)
5802	Q9VZZ5	Q9VZZ5	CG16986-RA		Dorsal + Ventral spn27A (8)
5836	Q9W0D8	Q9W0D8			Dorsal + Ventral spn27A (8)
5917	Q9W1E8	Q9W1E8	or		Dorsal + Ventral spn27A (8)
6020	Q9W2P5	Q9W2P5			Dorsal + Ventral spn27A (8)
6117	Q9W3T2	Q9W3T2	CG4593-RA		Dorsal + Ventral spn27A (8)
6269	Q9XY35	Q9XY35	ox	Cytochrome b-c1 complex subunit 9	Dorsal + Ventral spn27A (8)
1059	D5AEM9;M9NDD5;Q24093	D5AEM9;M9NDD5;Q24093	Hydr2	Abhydrolase domain-containing protein 2	Dorsal + Ventral spn27A (8)
3102	Q8MSE4	Q8MSE4			Dorsal + Ventral spn27A (8)
2489	Q7JWQ7	Q7JWQ7	Swim		Dorsal + Ventral spn27A (8)
6536	X2JAM4;X2JG79;Q7KV92;M9PEC5;Q0E8J1;M9MRP8;M9NFH6;M9MRN5;M9MRZ4;M9NEY0;M9MRQ1	X2JAM4;X2JG79;Q7KV92;M9PEC5;Q0E8J1			Dorsal + Ventral spn27A (8)
6176	Q9W4C2	Q9W4C2			Dorsal + Ventral spn27A (8)
6093	Q9W3K3	Q9W3K3			Dorsal + Ventral spn27A (8)
5944	Q9W1Q5	Q9W1Q5	CG3520-RA		Dorsal + Ventral spn27A (8)
5895	Q9W138	Q9W138	CG3570	Probable methyltransferase BTM2 homolog	Dorsal + Ventral spn27A (8)
5817	Q9W060	Q9W060	mv		Dorsal + Ventral spn27A (8)
5769	Q9VZJ4	Q9VZJ4			Dorsal + Ventral spn27A (8)
5620	Q9VXU6	Q9VXU6	mh		Dorsal + Ventral spn27A (8)
5564	X2JKS9;Q9VXB3	X2JKS9;Q9VXB3	Sap30	Histone deacetylase complex subunit SAP30 homolog	Dorsal + Ventral spn27A (8)
5469	Q9VWD0	Q9VWD0	parvin		Dorsal + Ventral spn27A (8)
5435	Q9VW10	Q9VW10			Dorsal + Ventral spn27A (8)
5343	Q9VUX9	Q9VUX9	Taspase1		Dorsal + Ventral spn27A (8)
5283	Q9VU64;Q8IQJ7	Q9VU64;Q8IQJ7	CG10171-RB		Dorsal + Ventral spn27A (8)
5271	Q9VU08	Q9VU08			Dorsal + Ventral spn27A (8)
5249	Q9VTU1	Q9VTU1	Atg12	Autophagy protein 12-like	Dorsal + Ventral spn27A (8)
5181	Q9VSX7	Q9VSX7			Dorsal + Ventral spn27A (8)
5150	Q9VSJ5	Q9VSJ5		NADPH-dependent diflavin oxidoreductase 1	Dorsal + Ventral spn27A (8)
5109	Q9VRZ7	Q9VRZ7			Dorsal + Ventral spn27A (8)
5056	X2JGA6;Q9VRB3	X2JGA6;Q9VRB3	Cyp6v1	Probable cytochrome P450 6v1	Dorsal + Ventral spn27A (8)
4952	Q9VQ29	Q9VQ29	RFeSP	Cytochrome b-c1 complex subunit Rieske, mitochondrial	Dorsal + Ventral spn27A (8)
4891	Q9VPC3	Q9VPC3			Dorsal + Ventral spn27A (8)
4867	Q9VP20	Q9VP20	Mkrn1		Dorsal + Ventral spn27A (8)
4843	Q9VNR2;C1C5A0;Q8IPS6;A8JNX2;M9PG15	Q9VNR2;C1C5A0;Q8IPS6;A8JNX2;M9PG15	SPoCk	Calcium-transporting ATPase	Dorsal + Ventral spn27A (8)
4805	Q9VNA4;Q59E06	Q9VNA4;Q59E06	CG1161	Uncharacterized protein CG1161	Dorsal + Ventral spn27A (8)
4778	Q9VMX6	Q9VMX6	Marcal1	SWI/SNF-related matrix-associated actin-dependent regulator of chromatin subfamily A-like protein 1	Dorsal + Ventral spn27A (8)
4772	Q9VMW7	Q9VMW7	CG8891	Inosine triphosphate pyrophosphatase	Dorsal + Ventral spn27A (8)
4706	Q9VM45	Q9VM45	Nuf2		Dorsal + Ventral spn27A (8)
4646	Q9VLI9	Q9VLI9	Trs23		Dorsal + Ventral spn27A (8)
4625	Q9VL63;M9PB85	Q9VL63;M9PB85	CG31712	UPF0430 protein CG31712	Dorsal + Ventral spn27A (8)
4522	Q9VK46	Q9VK46		Protein YIPF	Dorsal + Ventral spn27A (8)
4392	Q9VIL0	Q9VIL0	bru	Protein brunelleschi	Dorsal + Ventral spn27A (8)
4371	Q9VIE1	Q9VIE1	Atg18b		Dorsal + Ventral spn27A (8)
4349	Q9VI24	Q9VI24	Zif		Dorsal + Ventral spn27A (8)
4281	Q9VHF6;Q8T0L6	Q9VHF6;Q8T0L6			Dorsal + Ventral spn27A (8)
4259	Q9VH94	Q9VH94	nmdyn-D7		Dorsal + Ventral spn27A (8)
4204	Q9VGP1	Q9VGP1	CG5270	Zinc finger FYVE domain-containing protein 26 homolog	Dorsal + Ventral spn27A (8)
4166	Q9VG80;Q8SWX8	Q9VG80;Q8SWX8	CG5196-RA	Palmitoyltransferase	Dorsal + Ventral spn27A (8)
4126	Q9VFP2	Q9VFP2	rdx	Protein roadkill	Dorsal + Ventral spn27A (8)
4088	Q9VF78	Q9VF78	ldlCp	Conserved oligomeric Golgi complex subunit 2	Dorsal + Ventral spn27A (8)
4065	Q9VEY4	Q9VEY4			Dorsal + Ventral spn27A (8)
4006	Q9VEA2	Q9VEA2	Vps39		Dorsal + Ventral spn27A (8)
3923	Q9VD92	Q9VD92	CG6353	Protein archease-like	Dorsal + Ventral spn27A (8)
3809	Q9VBZ9	Q9VBZ9	beta4GalT7		Dorsal + Ventral spn27A (8)
3782	Q9VBR9	Q9VBR9			Dorsal + Ventral spn27A (8)
3698	Q9VAN8	Q9VAN8	CG11882-RA		Dorsal + Ventral spn27A (8)
3674	Q9VAG4	Q9VAG4	Vps16B		Dorsal + Ventral spn27A (8)
3638	Q9V9W4	Q9V9W4			Dorsal + Ventral spn27A (8)
3520	Q9V3X4	Q9V3X4	Seipin	Seipin	Dorsal + Ventral spn27A (8)
3498	Q9V3Q4	Q9V3Q4	Jafrac2		Dorsal + Ventral spn27A (8)
3481	Q9V3H0	Q9V3H0	Drep4		Dorsal + Ventral spn27A (8)
3431	Q9U405	Q9U405	grau	Transcription factor grauzone	Dorsal + Ventral spn27A (8)
3235	Q8T0G8	Q8T0G8	ltd		Dorsal + Ventral spn27A (8)
3191	Q8SYD0	Q8SYD0	Ttc19	Tetratricopeptide repeat protein 19 homolog, mitochondrial	Dorsal + Ventral spn27A (8)
3124	Q8MYL1	Q8MYL1	Fancd2		Dorsal + Ventral spn27A (8)
3083	Q8MQP2;Q9VLU9	Q8MQP2;Q9VLU9	CG7231-RD		Dorsal + Ventral spn27A (8)
3050	Q8IRR5	Q8IRR5	Sirt4	NAD-dependent protein deacetylase Sirt4	Dorsal + Ventral spn27A (8)
3034	Q8IRD1	Q8IRD1			Dorsal + Ventral spn27A (8)
3014	Q8IQQ0	Q8IQQ0	Nc73EF		Dorsal + Ventral spn27A (8)
2851	Q7YZ99;Q9W0B0;A8JNI2;Q86BP9;X2J8K5	Q7YZ99;Q9W0B0;A8JNI2			Dorsal + Ventral spn27A (8)
2831	Q7PL82	Q7PL82	Spf45		Dorsal + Ventral spn27A (8)
2696	Q7KK97	Q7KK97	sut1		Dorsal + Ventral spn27A (8)
2666	Q7K561	Q7K561			Dorsal + Ventral spn27A (8)
2612	Q7K2Q8	Q7K2Q8	Trs31		Dorsal + Ventral spn27A (8)
2572	Q7K172	Q7K172	ste24a		Dorsal + Ventral spn27A (8)
2558	Q7K0W1	Q7K0W1			Dorsal + Ventral spn27A (8)
2490	Q7JWR4	Q7JWR4			Dorsal + Ventral spn27A (8)
2449	Q7JUM3	Q7JUM3			Dorsal + Ventral spn27A (8)
2394	Q6NN40	Q6NN40	Ntmt	Alpha N-terminal protein methyltransferase 1	Dorsal + Ventral spn27A (8)
2367	Q5LJQ3	Q5LJQ3			Dorsal + Ventral spn27A (8)
2330	Q4V429	Q4V429			Dorsal + Ventral spn27A (8)
2236	Q53XG2;Q24114	Q53XG2;Q24114	dally	Division abnormally delayed protein	Dorsal + Ventral spn27A (8)
2221	Q1RL12;A4V0B5;Q24048	Q1RL12;A4V0B5;Q24048	nrv2	Sodium/potassium-transporting ATPase subunit beta-2	Dorsal + Ventral spn27A (8)
2042	P46415	P46415	Fdh	Alcohol dehydrogenase class-3	Dorsal + Ventral spn27A (8)
1906	P17719	P17719	Dhfr	Dihydrofolate reductase	Dorsal + Ventral spn27A (8)
1869	P09180	P09180	RpL4	60S ribosomal protein L4	Dorsal + Ventral spn27A (8)
1780	O76912	O76912	crm		Dorsal + Ventral spn27A (8)
1767	O76742	O76742	Rab7		Dorsal + Ventral spn27A (8)
1733	O46089;X2JA69	O46089;X2JA69	CG14803	Protein MMS22-like	Dorsal + Ventral spn27A (8)
1727	O46067	O46067	EG:25E8.1		Dorsal + Ventral spn27A (8)
1705	X2J5T3;O18334	X2J5T3;O18334	Rab6	Ras-related protein Rab6	Dorsal + Ventral spn27A (8)
1698	O16797	O16797	RpL3	60S ribosomal protein L3	Dorsal + Ventral spn27A (8)
1651	Q9VXE7;M9PHS8	Q9VXE7;M9PHS8			Dorsal + Ventral spn27A (8)
1578	M9PFT2;Q9VPB1	M9PFT2;Q9VPB1	CG3634	Protein ST7 homolog	Dorsal + Ventral spn27A (8)
1560	M9PFF0;P41126	M9PFF0;P41126	RpL13	60S ribosomal protein L13	Dorsal + Ventral spn27A (8)
1527	M9PEJ2	M9PEJ2			Dorsal + Ventral spn27A (8)
1496	M9PDJ6;P49858	M9PDJ6;P49858	cni	Protein cornichon	Dorsal + Ventral spn27A (8)
1480	M9PDG3;M9PD57;P40798	M9PDG3;M9PD57;P40798	stc	Protein shuttle craft	Dorsal + Ventral spn27A (8)
1466	Q86LC7;M9PD02;Q24180;M9PFP9;E8NH34	Q86LC7;M9PD02;Q24180;M9PFP9;E8NH34	Deaf1	Deformed epidermal autoregulatory factor 1	Dorsal + Ventral spn27A (8)
1432	M9PCC1;O18640;M9PB67	M9PCC1;O18640	Rack1	Guanine nucleotide-binding protein subunit beta-like protein	Dorsal + Ventral spn27A (8)
1367	Q9VQ83;M9PB06	Q9VQ83;M9PB06			Dorsal + Ventral spn27A (8)
1257	M9MRT6;P08645	M9MRT6;P08645	R	Ras-like protein 3	Dorsal + Ventral spn27A (8)
1235	Q5LK13;L7EEU0;L7EFC0;Q5LK12	Q5LK13;L7EEU0;L7EFC0;Q5LK12	Dbp80		Dorsal + Ventral spn27A (8)
1233	X2J9E8;L0MQ08;Q9V498	X2J9E8;L0MQ08;Q9V498	Cals	Calsyntenin-1	Dorsal + Ventral spn27A (8)
1124	Q7KSI9;E1JIL1	Q7KSI9;E1JIL1			Dorsal + Ventral spn27A (8)
1045	D1YSG8	D1YSG8	CaMKII		Dorsal + Ventral spn27A (8)
964	B7Z131;B7Z132;X2JIR4;M9PJ95;B7Z129;M9PGJ9;B7Z130;O77086	B7Z131;B7Z132;X2JIR4;M9PJ95;B7Z129;M9PGJ9;B7Z130;O77086	C3G	Guanine nucleotide-releasing factor 2	Dorsal + Ventral spn27A (8)
890	B5RJS0;X2JAX8;D5SHR1;M9MQH0;H1UUM2	B5RJS0;X2JAX8;D5SHR1;M9MQH0;H1UUM2	CG4040-RA;CG42388-RF;CG42388-RC		Dorsal + Ventral spn27A (8)
736	A2VEK1	A2VEK1			Dorsal + Ventral spn27A (8)
709	A1ZBE8	A1ZBE8	CG15099	Protein dopey-1 homolog	Dorsal + Ventral spn27A (8)
698	A1ZB42	A1ZB42	MED9	Mediator of RNA polymerase II transcription subunit 9	Dorsal + Ventral spn27A (8)
682	A1ZAN2;A4UZL2;B7YZI1;A4UZL3	A1ZAN2;A4UZL2;B7YZI1;A4UZL3	Ehbp1		Dorsal + Ventral spn27A (8)
647	A1Z9I6	A1Z9I6			Dorsal + Ventral spn27A (8)
572	A1Z7C1;A0A0B4KEM3	A1Z7C1;A0A0B4KEM3	Mlh1		Dorsal + Ventral spn27A (8)
425	Q8MLP3;A0A0B4LGL2;Q9W188;D6W4U0	Q8MLP3;A0A0B4LGL2;Q9W188;D6W4U0	CG3376-RA	Sphingomyelin phosphodiesterase	Dorsal + Ventral spn27A (8)
339	A0A0B4LF00;A1Z833;A0A0B4LEL6;A0A0B4LF16;Q7K2V5;A0A0B4KF56;E2QCN5	A0A0B4LF00;A1Z833;A0A0B4LEL6;A0A0B4LF16;Q7K2V5;A0A0B4KF56;E2QCN5		Palmitoyltransferase	Dorsal + Ventral spn27A (8)
329	A0A0B4KI25;E1JIX9;Q6NP71;Q9VBN0;A8JRD0;A8JRD1;A0A0B4KHW9;A8JRD2;Q9VBN1	A0A0B4KI25;E1JIX9;Q6NP71;Q9VBN0;A8JRD0;A8JRD1;A0A0B4KHW9;A8JRD2;Q9VBN1	LpR1		Dorsal + Ventral spn27A (8)
207	A0A0B4KFS3;Q8T4A5	A0A0B4KFS3;Q8T4A5			Dorsal + Ventral spn27A (8)
143	A1Z742;A0A0B4KEL9;A1Z741;D1Z396;A0A0B4KFB9;Q7JUR6	A1Z742;A0A0B4KEL9;A1Z741;D1Z396;A0A0B4KFB9;Q7JUR6	CG18812-RA;CG18812-RB;CG18812	Protein GDAP2 homolog	Dorsal + Ventral spn27A (8)
104	A0A0B4K7R1;Q9VCA9	A0A0B4K7R1;Q9VCA9	Spase22-23	Signal peptidase complex subunit 3	Dorsal + Ventral spn27A (8)
35	A0A0B4K618	A0A0B4K618	Fmr1		Dorsal + Ventral spn27A (8)
229	A0A0B4KG76;Q9VNG9;Q8IPP5;A0A0B4KGK7;E1JJ52	A0A0B4KG76;Q9VNG9;Q8IPP5;A0A0B4KGK7;E1JJ52	plx		Dorsal + Ventral spn27A (8)
389	A0A0B4LFU5;Q8IGJ0	A0A0B4LFU5;Q8IGJ0	stmA	Protein EFR3 homolog cmp44E	Dorsal + Ventral spn27A (8)
504	Q9VTT4;A0A0S0WNE9	Q9VTT4;A0A0S0WNE9			Dorsal + Ventral spn27A (8)
1155	E1JJM7;Q8IR79;E1JJM8	E1JJM7;Q8IR79;E1JJM8	LIMK1	LIM domain kinase 1	Dorsal + Ventral spn27A (8)
1495	M9PDI7;Q8IRW6;M9PIQ9	M9PDI7;Q8IRW6;M9PIQ9			Dorsal + Ventral spn27A (8)
1631	M9PH10;P46461	M9PH10;P46461	comt	Vesicle-fusing ATPase 1	Dorsal + Ventral spn27A (8)
2862	Q9VGG3;Q86B99;Q86B98	Q9VGG3;Q86B99;Q86B98	CG14732		Dorsal + Ventral spn27A (8)
3146	Q8SX24	Q8SX24			Dorsal + Ventral spn27A (8)
3613	Q9V8Y2	Q9V8Y2	Obp56a	General odorant-binding protein 56a	Dorsal + Ventral spn27A (8)
3911	Q9VD22	Q9VD22			Dorsal + Ventral spn27A (8)
4588	Q9VKV1	Q9VKV1	LManII	Alpha-mannosidase	Dorsal + Ventral spn27A (8)
4699	Q9VM00	Q9VM00	RapGAP1		Dorsal + Ventral spn27A (8)
5027	Q9VR04	Q9VR04			Dorsal + Ventral spn27A (8)
5779	Q9VZP9	Q9VZP9	CG12012-RA		Dorsal + Ventral spn27A (8)
5961	Q9W1Z6	Q9W1Z6	stl		Dorsal + Ventral spn27A (8)
3057	Q8MKJ9	Q8MKJ9			Dorsal + Ventral spn27A (8)
5744	Q9VZ63	Q9VZ63			Dorsal + Ventral spn27A (8)
6226	Q9W513	Q9W513			Dorsal + Ventral spn27A (8)
5824	Q9W095	Q9W095	Gk		Dorsal + Ventral spn27A (8)
5402	Q9VVM1	Q9VVM1			Dorsal + Ventral spn27A (8)
4732	Q9VMD5	Q9VMD5	frj		Dorsal + Ventral spn27A (8)
4698	Q9VLZ7	Q9VLZ7	Cyp4d21	Probable cytochrome P450 4d21	Dorsal + Ventral spn27A (8)
4341	Q9VHX6	Q9VHX6			Dorsal + Ventral spn27A (8)
3845	Q9VCC3	Q9VCC3	mRpS24	28S ribosomal protein S24, mitochondrial	Dorsal + Ventral spn27A (8)
3584	Q9V574	Q9V574	l(2)k10201	Protein lethal(2)k10201	Dorsal + Ventral spn27A (8)
2996	Q8IQ82;Q8IQ80	Q8IQ82;Q8IQ80	pst		Dorsal + Ventral spn27A (8)
2450	Q7JUN3	Q7JUN3			Dorsal + Ventral spn27A (8)
1566	Q9VVJ0;M9PFK5	Q9VVJ0;M9PFK5			Dorsal + Ventral spn27A (8)
1430	M9PCA1;P11449	M9PCA1;P11449	Vm26Aa	Vitelline membrane protein Vm26Aa	Dorsal + Ventral spn27A (8)
531	A0A1L4AAD6	A0A1L4AAD6			Dorsal + Ventral spn27A (8)
429	Q9VNC3;A0A0B4LGM5;A0A0B4KF92;A0A0B4LGS6	Q9VNC3;A0A0B4LGM5;A0A0B4KF92;A0A0B4LGS6	Hcs		Dorsal + Ventral spn27A (8)
387	A0A0B4LFT2;Q27606;Q9V4T5	A0A0B4LFT2;Q27606	Cyp4e2	Cytochrome P450 4e2	Dorsal + Ventral spn27A (8)
169	A0A0B4KF96;A1Z897	A0A0B4KF96;A1Z897	CG12895	Succinate dehydrogenase assembly factor 2, mitochondrial;Succinate dehydrogenase assembly factor 2-B, mitochondrial	Dorsal + Ventral spn27A (8)
700	A1ZB68	A1ZB68	GstE3		Dorsal + Ventral spn27A (8)
1336	M9NEW0	M9NEW0	CG43346-RA		Dorsal + Ventral spn27A (8)
2150	Q07407	Q07407	htl	Fibroblast growth factor receptor homolog 1	Dorsal + Ventral spn27A (8)
2606	Q7K2J4	Q7K2J4	dmpd		Dorsal + Ventral spn27A (8)
5578	Q9VXG9	Q9VXG9			Dorsal + Ventral spn27A (8)
5510	Q9VWQ3	Q9VWQ3			Dorsal + Ventral spn27A (8)
2956	Q9VJA1;Q8INY1	Q9VJA1;Q8INY1	Socs36E		Dorsal + Ventral spn27A (8)
250	A0A126GUT4;A0A0B4KGN1;Q95V55	A0A126GUT4;A0A0B4KGN1;Q95V55	foxo	Forkhead box protein O	Dorsal + Ventral spn27A (8)
5782	Q9VZR2	Q9VZR2	Drsl5		Dorsal + Ventral spn27A (8)
5595	X2JFM8;Q9VXM6	X2JFM8;Q9VXM6	CG16952-RB		Dorsal + Ventral spn27A (8)
4870	Q9VP36;M9PIG0	Q9VP36;M9PIG0			Dorsal + Ventral spn27A (8)
4749	Q9VML2	Q9VML2	bchs		Dorsal + Ventral spn27A (8)
4564	Q9VKJ8	Q9VKJ8			Dorsal + Ventral spn27A (8)
4361	Q9VI83	Q9VI83			Dorsal + Ventral spn27A (8)
3339	Q95U58	Q95U58	mkg-p		Dorsal + Ventral spn27A (8)
3178	Q8SXX0	Q8SXX0			Dorsal + Ventral spn27A (8)
651	A1Z9K4;Q7KQC4;A0A0B4JD18;Q95RE0;A0A0B4KEQ5	A1Z9K4;Q7KQC4;A0A0B4JD18;Q95RE0;A0A0B4KEQ5	RN-tre		Dorsal + Ventral spn27A (8)
5302	Q9VUC7	Q9VUC7	Pex1		Dorsal + Ventral spn27A (8)
5640	Q9VY27	Q9VY27	nmdyn-D6	Nucleoside diphosphate kinase	Dorsal + Ventral spn27A (8)
5123	Q9VS60	Q9VS60	SMSr	Sphingomyelin synthase-related 1	Dorsal + Ventral spn27A (8)
4898	Q9VPE4	Q9VPE4	CG5969	Vacuolar ATPase assembly integral membrane protein VMA21 homolog	Dorsal + Ventral spn27A (8)
3894	Q9VCW1	Q9VCW1	Cyp6d4	Probable cytochrome P450 6d4	Dorsal + Ventral spn27A (8)
3846	Q9VCC4	Q9VCC4			Dorsal + Ventral spn27A (8)
3093	Q8MRT7	Q8MRT7			Dorsal + Ventral spn27A (8)
127	A0A0B4KEH8;A0A0B4KEC2;Q9W5H8;Q5LJQ4	A0A0B4KEH8;A0A0B4KEC2;Q9W5H8;Q5LJQ4			Dorsal + Ventral spn27A (8)
141	A8DYA5;Q5BI22;A0A0B4KEK4;A1Z8M8;A0A0B4KEU4;A8DYA6	A8DYA5;Q5BI22;A0A0B4KEK4;A1Z8M8;A0A0B4KEU4;A8DYA6	CG9003-RC		Dorsal + Ventral Tl10B spn27A (9)
6234	Q9W547	Q9W547	mRpL16		Dorsal + Ventral Tl10B spn27A (9)
5894	Q9W137	Q9W137			Dorsal + Ventral Tl10B spn27A (9)
153	A0A0B4KEV9;A8DYK1;Q9W2Q7;A0A0B4LH15	A0A0B4KEV9;A8DYK1;Q9W2Q7;A0A0B4LH15	Ipk1	Inositol-pentakisphosphate 2-kinase	Dorsal + Ventral Tl10B spn27A (9)
193	A0A0B4KFJ7;Q9VHH9	A0A0B4KFJ7;Q9VHH9	Kdm2	JmjC domain-containing histone demethylation protein 1	Dorsal + Ventral Tl10B spn27A (9)
383	A0A0B4LFP9;Q4V6M7	A0A0B4LFP9;Q4V6M7	UFSP1	Probable Ufm1-specific protease 1	Dorsal + Ventral Tl10B spn27A (9)
481	A0A0B4LIG1	A0A0B4LIG1	pre-mod(mdg4)-C		Dorsal + Ventral Tl10B spn27A (9)
628	A1Z8X3	A1Z8X3	ana3		Dorsal + Ventral Tl10B spn27A (9)
761	A4V2I0;Q7KSX2;P15364	A4V2I0;Q7KSX2;P15364	Ama	Protein amalgam	Dorsal + Ventral Tl10B spn27A (9)
1065	E0R7Q5;Q9VQP9	E0R7Q5;Q9VQP9	CG9662-RA;CG9662	Putative oligosaccharyltransferase complex subunit CG9662	Dorsal + Ventral Tl10B spn27A (9)
1736	O46100;M9PDG9	O46100;M9PDG9	fs(1)N		Dorsal + Ventral Tl10B spn27A (9)
2167	Q0E8M3	Q0E8M3	CG34137-RA		Dorsal + Ventral Tl10B spn27A (9)
2494	Q7JWX3	Q7JWX3	nec		Dorsal + Ventral Tl10B spn27A (9)
2636	Q7K483	Q7K483			Dorsal + Ventral Tl10B spn27A (9)
2762	Q7KTC4;Q7KTB7	Q7KTC4;Q7KTB7	MRP		Dorsal + Ventral Tl10B spn27A (9)
3007	Q8IQH9;Q8IQI0;M9PI47;M9PCC4;Q9XZ09	Q8IQH9;Q8IQI0;M9PI47;M9PCC4;Q9XZ09	Sap130		Dorsal + Ventral Tl10B spn27A (9)
3199	Q8SYM9	Q8SYM9	CG5147-RA		Dorsal + Ventral Tl10B spn27A (9)
3324	Q95T98	Q95T98	CG9798	Elongation of very long chain fatty acids protein	Dorsal + Ventral Tl10B spn27A (9)
3391	Q9I7L8;E1JHM5	Q9I7L8;E1JHM5	Cdc23		Dorsal + Ventral Tl10B spn27A (9)
3463	Q9V3C6	Q9V3C6	EG:BACR42I17.10		Dorsal + Ventral Tl10B spn27A (9)
3527	Q9V3Z2	Q9V3Z2	Sp7		Dorsal + Ventral Tl10B spn27A (9)
3872	Q9VCJ8;Q8IN70	Q9VCJ8	SPE		Dorsal + Ventral Tl10B spn27A (9)
4202	Q9VGN9	Q9VGN9	RpL24-like	Probable ribosome biogenesis protein RLP24	Dorsal + Ventral Tl10B spn27A (9)
4332	Q9VHV9	Q9VHV9			Dorsal + Ventral Tl10B spn27A (9)
4359	Q9VI74	Q9VI74	CG10055	Protein SHQ1 homolog	Dorsal + Ventral Tl10B spn27A (9)
4689	Q9VLU4	Q9VLU4	Spn28Dc		Dorsal + Ventral Tl10B spn27A (9)
4829	Q9VNG2	Q9VNG2			Dorsal + Ventral Tl10B spn27A (9)
4941	Q9VPX4	Q9VPX4	Tfb4		Dorsal + Ventral Tl10B spn27A (9)
5012	Q9VQT7	Q9VQT7	CG16713-RA		Dorsal + Ventral Tl10B spn27A (9)
5096	Q9VRU2	Q9VRU2	loj		Dorsal + Ventral Tl10B spn27A (9)
5140	Q9VSE8	Q9VSE8			Dorsal + Ventral Tl10B spn27A (9)
5560	Q9VXA8	Q9VXA8	CG9125	Decapping nuclease DXO homolog	Dorsal + Ventral Tl10B spn27A (9)
5591	Q9VXL4	Q9VXL4	Rrp47		Dorsal + Ventral Tl10B spn27A (9)
5645	Q9VY47;Q8MR65	Q9VY47			Dorsal + Ventral Tl10B spn27A (9)
5700	X2JJK8;Q9VYS5	X2JJK8;Q9VYS5	sicily	NADH dehydrogenase (ubiquinone) complex I, assembly factor 6 homolog	Dorsal + Ventral Tl10B spn27A (9)
5803	Q9VZZ6	Q9VZZ6			Dorsal + Ventral Tl10B spn27A (9)
5822	Q9W087;Q9VHQ9	Q9W087			Dorsal + Ventral Tl10B spn27A (9)
5867	Q9W0Q2	Q9W0Q2	Cypl	Peptidyl-prolyl cis-trans isomerase	Dorsal + Ventral Tl10B spn27A (9)
4	A0A0A1EI90	A0A0A1EI90	CG45784-RA		Dorsal + Ventral Tl10B spn27A (9)
5786	Q9VZS7	Q9VZS7			Dorsal + Ventral Tl10B spn27A (9)
5865	Q9W0P4	Q9W0P4			Dorsal + Ventral Tl10B spn27A (9)
5898	Q9W145;A0A0B4LGM4	Q9W145;A0A0B4LGM4	Start1		Dorsal + Ventral Tl10B spn27A (9)
5911	Q9W1A9	Q9W1A9	enok	Histone acetyltransferase	Dorsal + Ventral Tl10B spn27A (9)
5926	Q9W1H1	Q9W1H1			Dorsal + Ventral Tl10B spn27A (9)
5982	Q9W282	Q9W282		tRNA pseudouridine synthase	Dorsal + Ventral Tl10B spn27A (9)
6106	Q9W3N9	Q9W3N9			Dorsal + Ventral Tl10B spn27A (9)
6146	Q9W403	Q9W403			Dorsal + Ventral Tl10B spn27A (9)
6163	Q9W455;Q95RH3	Q9W455;Q95RH3			Dorsal + Ventral Tl10B spn27A (9)
6197	Q9W4M3	Q9W4M3	Femcoat		Dorsal + Ventral Tl10B spn27A (9)
6218	Q9W4X8	Q9W4X8	Bzd		Dorsal + Ventral Tl10B spn27A (9)
6235	Q9W550	Q9W550	CG14805-RA		Dorsal + Ventral Tl10B spn27A (9)
6249	Q9W5D3	Q9W5D3	EG:34F3.4		Dorsal + Ventral Tl10B spn27A (9)
6284	Q9XZ08	Q9XZ08	botv	Exostosin-3	Dorsal + Ventral Tl10B spn27A (9)
6310	Q9Y095	Q9Y095	XRCC1		Dorsal + Ventral Tl10B spn27A (9)
6333	Q9Y153	Q9Y153	BcDNA.GH03377		Dorsal + Ventral Tl10B spn27A (9)
6534	X2JC02;X2J8M7;X2JCG0;E1JIB9;Q7KV98;Q9W016;E1JIC0;X2JAL9;M9PDU5;M9MRU6;Q9W013;Q8IRF0	X2JC02;X2J8M7;X2JCG0;E1JIB9;Q7KV98;Q9W016;E1JIC0;X2JAL9;M9PDU5			Dorsal + Ventral Tl10B spn27A (9)
6343	R9PY27	R9PY27			Dorsal + Ventral Tl10B spn27A (9)
6311	Q9Y0V3	Q9Y0V3	Tim9b	Mitochondrial import inner membrane translocase subunit Tim10B	Dorsal + Ventral Tl10B spn27A (9)
6287	Q9XZ12	Q9XZ12			Dorsal + Ventral Tl10B spn27A (9)
6260	Q9W5W6	Q9W5W6			Dorsal + Ventral Tl10B spn27A (9)
6237	Q9W552	Q9W552	Vps26	Vacuolar protein sorting-associated protein 26	Dorsal + Ventral Tl10B spn27A (9)
6231	Q9W541	Q9W541	eIF2B-epsilon		Dorsal + Ventral Tl10B spn27A (9)
6201	T2GGJ9;Q9W4N2	T2GGJ9;Q9W4N2	CG6379-RB;CG6379	Cap-specific mRNA (nucleoside-2-O-)-methyltransferase 1	Dorsal + Ventral Tl10B spn27A (9)
6166	Q9W464	Q9W464	GAA1		Dorsal + Ventral Tl10B spn27A (9)
6161	Q9W448;X2JDV7	Q9W448;X2JDV7			Dorsal + Ventral Tl10B spn27A (9)
6124	Q9W3V1	Q9W3V1	Cht11		Dorsal + Ventral Tl10B spn27A (9)
6037	Q9W328	Q9W328	Lst8	Protein LST8 homolog	Dorsal + Ventral Tl10B spn27A (9)
5960	Q9W1Y8	Q9W1Y8			Dorsal + Ventral Tl10B spn27A (9)
5919	Q9W1F4	Q9W1F4	thoc5	THO complex subunit 5	Dorsal + Ventral Tl10B spn27A (9)
5910	Q9W1A8	Q9W1A8			Dorsal + Ventral Tl10B spn27A (9)
5884	Q9W102	Q9W102	Orc4		Dorsal + Ventral Tl10B spn27A (9)
5857	Q9W0M5	Q9W0M5			Dorsal + Ventral Tl10B spn27A (9)
5776	Q9VZM5	Q9VZM5	CG12006	GPI mannosyltransferase 3	Dorsal + Ventral Tl10B spn27A (9)
30	A0A0B4JDF4;Q9VAL5;P35832	A0A0B4JDF4;Q9VAL5;P35832	Ptp99A	Protein-tyrosine-phosphatase;Tyrosine-protein phosphatase 99A	Dorsal + Ventral Tl10B spn27A (9)
89	Q9GQ82;A0A0B4K7C1;A0A0B4KFS5	Q9GQ82;A0A0B4K7C1;A0A0B4KFS5	Asph		Dorsal + Ventral Tl10B spn27A (9)
159	Q7JZN2;A1ZBD6;A0A126GUP9;A0A0C4DHG8;A0A0B4KEZ6	Q7JZN2;A1ZBD6;A0A126GUP9;A0A0C4DHG8;A0A0B4KEZ6	Mctp		Dorsal + Ventral Tl10B spn27A (9)
165	A0A0B4KF46	A0A0B4KF46	Uba1		Dorsal + Ventral Tl10B spn27A (9)
173	Q0E9C5;A1Z8F4;A0A0B4KFC0	Q0E9C5;A1Z8F4;A0A0B4KFC0	shn		Dorsal + Ventral Tl10B spn27A (9)
176	A0A0B4KFD5	A0A0B4KFD5	Ate1	Arginyl-tRNA--protein transferase 1	Dorsal + Ventral Tl10B spn27A (9)
187	Q9W1W8;A0A0B4KFG3	Q9W1W8;A0A0B4KFG3			Dorsal + Ventral Tl10B spn27A (9)
231	A0A0B4KG83;Q9VEC3	A0A0B4KG83;Q9VEC3	Arp5	Actin-related protein 5	Dorsal + Ventral Tl10B spn27A (9)
274	A0A0B4KH54;Q9VFL5	A0A0B4KH54;Q9VFL5	Aats-met	Methionine--tRNA ligase, mitochondrial	Dorsal + Ventral Tl10B spn27A (9)
292	A0A0B4KHH2;Q95SP2	A0A0B4KHH2;Q95SP2	sip3	E3 ubiquitin-protein ligase HRD1	Dorsal + Ventral Tl10B spn27A (9)
319	A0A0B4KHY4;P08953	A0A0B4KHY4;P08953	Tl	Protein toll	Dorsal + Ventral Tl10B spn27A (9)
321	A0A0B4KHY8;Q9XZ32	A0A0B4KHY8;Q9XZ32			Dorsal + Ventral Tl10B spn27A (9)
342	A8DY62;A0A0B4LES9	A8DY62;A0A0B4LES9			Dorsal + Ventral Tl10B spn27A (9)
386	A0A0B4LFS3;Q8SX68	A0A0B4LFS3;Q8SX68	CG10915	Uncharacterized protein CG10915	Dorsal + Ventral Tl10B spn27A (9)
396	A0A0B4LFY2;Q7JW12	A0A0B4LFY2;Q7JW12	CG11007	Thioredoxin-related transmembrane protein 2 homolog	Dorsal + Ventral Tl10B spn27A (9)
400	A8DYJ3;A0A0B4LG26;Q11002;Q9VFV0	A8DYJ3;A0A0B4LG26;Q11002	CalpA	Calpain-A;Calpain-A catalytic subunit	Dorsal + Ventral Tl10B spn27A (9)
401	A0A0B4LG36;Q06943	A0A0B4LG36;Q06943	HmgZ	High mobility group protein Z	Dorsal + Ventral Tl10B spn27A (9)
417	A0A0B4LGG6;Q9W1H0	A0A0B4LGG6;Q9W1H0	Lpt		Dorsal + Ventral Tl10B spn27A (9)
418	A0A0B4LGH5;Q9V769	A0A0B4LGH5;Q9V769	Cyp6a22	Cytochrome P450 6a22	Dorsal + Ventral Tl10B spn27A (9)
435	A0A0B4LGS5;Q8MRA9	A0A0B4LGS5;Q8MRA9			Dorsal + Ventral Tl10B spn27A (9)
436	A0A0B4LGT4;Q9VHV5	A0A0B4LGT4;Q9VHV5	Gie	ADP-ribosylation factor-like protein 8	Dorsal + Ventral Tl10B spn27A (9)
440	A0A0B4LGW2;A1ZB14	A0A0B4LGW2;A1ZB14	Elk		Dorsal + Ventral Tl10B spn27A (9)
445	A0A0B4LGZ5;P46222	A0A0B4LGZ5;P46222	RpL11	60S ribosomal protein L11	Dorsal + Ventral Tl10B spn27A (9)
463	A0A0B4LHG2;Q0KI28	A0A0B4LHG2;Q0KI28	Muted;muted	Biogenesis of lysosome-related organelles complex 1 subunit 5	Dorsal + Ventral Tl10B spn27A (9)
492	A0A0C4DHE7	A0A0C4DHE7	Gdh	Glutamate dehydrogenase	Dorsal + Ventral Tl10B spn27A (9)
495	A0A0C4DHG1;Q9VNE3;A0A0B4KF37	A0A0C4DHG1;Q9VNE3	CG1427-RC	O-phosphoseryl-tRNA(Sec) selenium transferase	Dorsal + Ventral Tl10B spn27A (9)
496	A0A0C4DHG2;Q07171;A0A0C4DHG6	A0A0C4DHG2;Q07171;A0A0C4DHG6	Gel	Gelsolin	Dorsal + Ventral Tl10B spn27A (9)
514	A0A126GUP6	A0A126GUP6			Dorsal + Ventral Tl10B spn27A (9)
567	A1Z782;A1Z783;Q8MQL4	A1Z782;A1Z783;Q8MQL4	CG8726-RB		Dorsal + Ventral Tl10B spn27A (9)
620	A1Z8R8	A1Z8R8	rho-7		Dorsal + Ventral Tl10B spn27A (9)
654	A1Z9L5	A1Z9L5	CG13016-RA		Dorsal + Ventral Tl10B spn27A (9)
663	A1Z9X0;A0A0B4KFQ6;A0A0B4KEQ8;A0A0B4KEV2;A0A0B4JD78;A0A0B4KG15;A0A0B4JD26	A1Z9X0;A0A0B4KFQ6;A0A0B4KEQ8;A0A0B4KEV2;A0A0B4JD78;A0A0B4KG15;A0A0B4JD26	aPKC	Atypical protein kinase C;Protein kinase C	Dorsal + Ventral Tl10B spn27A (9)
670	A1ZA92	A1ZA92	CG8414	Polynucleotide 5-hydroxyl-kinase NOL9	Dorsal + Ventral Tl10B spn27A (9)
681	A1ZAM0	A1ZAM0			Dorsal + Ventral Tl10B spn27A (9)
692	A1ZAW9	A1ZAW9	Oxp		Dorsal + Ventral Tl10B spn27A (9)
724	A1ZBU8	A1ZBU8			Dorsal + Ventral Tl10B spn27A (9)
791	A4V4F2;M9PJN2;M9PHT0;F2FB46;M9PHL7;O61492;C9QP31	A4V4F2;M9PJN2;M9PHT0;F2FB46;M9PHL7;O61492;C9QP31	Flo2;Flo-2	Flotillin-2	Dorsal + Ventral Tl10B spn27A (9)
797	A4V4U5;M9NHG9;M9NFJ2;Q04499	A4V4U5;M9NHG9;M9NFJ2;Q04499	slgA	Proline dehydrogenase 1, mitochondrial	Dorsal + Ventral Tl10B spn27A (9)
811	A8DYT3;M9PE16;A8DYT2;Q9VQ67	A8DYT3;M9PE16;A8DYT2;Q9VQ67			Dorsal + Ventral Tl10B spn27A (9)
859	A8JUQ9;Q9NHV9;M9PHJ6	A8JUQ9;Q9NHV9;M9PHJ6	Vav	Protein vav	Dorsal + Ventral Tl10B spn27A (9)
864	Q9W4Y6;A8JUV7	Q9W4Y6;A8JUV7	boi		Dorsal + Ventral Tl10B spn27A (9)
876	Q7PLP4;A8Y582;Q7PLP5	Q7PLP4;A8Y582;Q7PLP5			Dorsal + Ventral Tl10B spn27A (9)
926	B7Z031	B7Z031	pes		Dorsal + Ventral Tl10B spn27A (9)
933	B7Z078;Q9VW25;B7Z083	B7Z078;Q9VW25	CG8786-RC;CG8786-RB		Dorsal + Ventral Tl10B spn27A (9)
1058	Q9VV51;D5AEK7;Q961F9	Q9VV51;D5AEK7;Q961F9			Dorsal + Ventral Tl10B spn27A (9)
1095	E1JHK3;C7LA93;P15330	E1JHK3;C7LA93;P15330	dl	Embryonic polarity protein dorsal	Dorsal + Ventral Tl10B spn27A (9)
1128	E1JIP3;Q9VE86;E8NH59	E1JIP3;Q9VE86;E8NH59	WRNexo;WRNexo-RB	Werner Syndrome-like exonuclease	Dorsal + Ventral Tl10B spn27A (9)
1131	E1JIS1;Q0KI33;Q59DV6;Q9VD98;E1JIS2	E1JIS1;Q0KI33;Q59DV6;Q9VD98;E1JIS2	CG7956-RA		Dorsal + Ventral Tl10B spn27A (9)
1152	E1JJI5;P54367	E1JJI5;P54367	CkIalpha	Casein kinase I isoform alpha	Dorsal + Ventral Tl10B spn27A (9)
1213	H0RNK7;Q9W261	H0RNK7;Q9W261	Rtf1-RA;Rtf1	RNA polymerase-associated protein Rtf1	Dorsal + Ventral Tl10B spn27A (9)
1222	H8F4V5;Q9VRM7	H8F4V5;Q9VRM7	spo	Cytochrome P450 307a1	Dorsal + Ventral Tl10B spn27A (9)
1254	M9MRS7;Q23978	M9MRS7;Q23978	Myo31DF	Myosin-IA	Dorsal + Ventral Tl10B spn27A (9)
1264	M9MS15;P23654	M9MS15;P23654	Nrt	Neurotactin	Dorsal + Ventral Tl10B spn27A (9)
1278	M9MSL0;Q9VU16	M9MSL0;Q9VU16			Dorsal + Ventral Tl10B spn27A (9)
1288	M9ND06;Q9VQ37;M9NDD0	M9ND06;Q9VQ37;M9NDD0	Rim2		Dorsal + Ventral Tl10B spn27A (9)
1331	M9NEQ5;Q9VJD2	M9NEQ5;Q9VJD2	CG5110	Ragulator complex protein LAMTOR3 homolog	Dorsal + Ventral Tl10B spn27A (9)
1348	M9NFA7;Q9VX91	M9NFA7;Q9VX91	Ubr1;UBR1	E3 ubiquitin-protein ligase UBR1	Dorsal + Ventral Tl10B spn27A (9)
1366	Q9VQ16;M9PAZ8	Q9VQ16;M9PAZ8			Dorsal + Ventral Tl10B spn27A (9)
1407	M9PBQ4;Q9VQ79	M9PBQ4;Q9VQ79	AIF	Putative apoptosis-inducing factor 1, mitochondrial	Dorsal + Ventral Tl10B spn27A (9)
1433	M9PCC3;P91641	M9PCC3;P91641	MED20	Mediator of RNA polymerase II transcription subunit 20	Dorsal + Ventral Tl10B spn27A (9)
1444	M9PCI2;Q9V3U2	M9PCI2;Q9V3U2	NHP2	H/ACA ribonucleoprotein complex subunit 2-like protein	Dorsal + Ventral Tl10B spn27A (9)
1449	M9PCK7;Q9VLJ8	M9PCK7;Q9VLJ8	CG13090	'Adenylyltransferase and sulfurtransferase MOCS3;Adenylyltransferase and sulfurtransferase MOCS3;Molybdopterin-synthase adenylylt...' <Preview truncated at 128 characters>	Dorsal + Ventral Tl10B spn27A (9)
1452	M9PCL6;P08761;Q7KUM8;M9PI66;Q7KUN2	M9PCL6;P08761;Q7KUM8;M9PI66	Eip71CD	Peptide methionine sulfoxide reductase	Dorsal + Ventral Tl10B spn27A (9)
1456	M9PCP3;Q9VMK9	M9PCP3;Q9VMK9			Dorsal + Ventral Tl10B spn27A (9)
1460	M9PCV1;Q9VK27	M9PCV1;Q9VK27	Edem2	alpha-1,2-Mannosidase	Dorsal + Ventral Tl10B spn27A (9)
1488	M9PDA6;Q9VIK9	M9PDA6;Q9VIK9	CG2614	Methyltransferase-like protein 13	Dorsal + Ventral Tl10B spn27A (9)
1491	M9PDF5;Q9V3R6	M9PDF5;Q9V3R6	Adat1;adat	tRNA-specific adenosine deaminase 1	Dorsal + Ventral Tl10B spn27A (9)
1500	Q9W4X4;M9PDM4	Q9W4X4;M9PDM4	PI4KIIIalpha		Dorsal + Ventral Tl10B spn27A (9)
1508	M9PDX4;Q9W089	M9PDX4;Q9W089			Dorsal + Ventral Tl10B spn27A (9)
1521	M9PEF6;Q9VQX4;M9PC31	M9PEF6;Q9VQX4;M9PC31	CG3714	Nicotinate phosphoribosyltransferase	Dorsal + Ventral Tl10B spn27A (9)
1528	M9PEJ9;M9PF10;Q9VSM4	M9PEJ9;M9PF10;Q9VSM4			Dorsal + Ventral Tl10B spn27A (9)
1530	M9PEL5;Q9VST7	M9PEL5;Q9VST7			Dorsal + Ventral Tl10B spn27A (9)
1539	M9PEW1	M9PEW1			Dorsal + Ventral Tl10B spn27A (9)
1563	Q9VUZ6;M9PFG1	Q9VUZ6;M9PFG1	l(3)72Dn		Dorsal + Ventral Tl10B spn27A (9)
1606	M9PGD7;Q9W4R9	M9PGD7;Q9W4R9			Dorsal + Ventral Tl10B spn27A (9)
1675	M9PIM0;O61231	M9PIM0;O61231	RpL10	60S ribosomal protein L10	Dorsal + Ventral Tl10B spn27A (9)
1695	O16102	O16102	Chd3	Chromodomain-helicase-DNA-binding protein 3	Dorsal + Ventral Tl10B spn27A (9)
1707	O18336;Q86BK8	O18336;Q86BK8	Rab14		Dorsal + Ventral Tl10B spn27A (9)
1731	O46084	O46084	Pgam5	Serine/threonine-protein phosphatase Pgam5, mitochondrial	Dorsal + Ventral Tl10B spn27A (9)
1734	O46094	O46094	Ocrl		Dorsal + Ventral Tl10B spn27A (9)
1742	O46342;A0A0B4K691;Q9VS73	O46342;A0A0B4K691	rpk		Dorsal + Ventral Tl10B spn27A (9)
1754	O62530	O62530	AP-2mu		Dorsal + Ventral Tl10B spn27A (9)
1763	O76464	O76464	NitFhit	Nitrilase and fragile histidine triad fusion protein NitFhit;Bis(5-adenosyl)-triphosphatase;Nitrilase homolog	Dorsal + Ventral Tl10B spn27A (9)
1769	O76767	O76767	KdelR	ER lumen protein-retaining receptor	Dorsal + Ventral Tl10B spn27A (9)
1775	O76877	O76877	EG:132E8.3		Dorsal + Ventral Tl10B spn27A (9)
1781	O76922	O76922	aub	Protein aubergine	Dorsal + Ventral Tl10B spn27A (9)
1783	O76928	O76928	cm		Dorsal + Ventral Tl10B spn27A (9)
1789	Q9W5E6;O77260	Q9W5E6;O77260	EG:115C2.6		Dorsal + Ventral Tl10B spn27A (9)
1792	O77266;Q960D4	O77266;Q960D4	EG:22E5.5		Dorsal + Ventral Tl10B spn27A (9)
1800	O96067	O96067	JTBR		Dorsal + Ventral Tl10B spn27A (9)
1804	O96553;A0A0B4K623	O96553;A0A0B4K623	pug	'C-1-tetrahydrofolate synthase, cytoplasmic;Methylenetetrahydrofolate dehydrogenase;Methenyltetrahydrofolate cyclohydrolase;Formy...' <Preview truncated at 128 characters>	Dorsal + Ventral Tl10B spn27A (9)
1814	O96989	O96989	CDC45L		Dorsal + Ventral Tl10B spn27A (9)
1819	O97132	O97132	Axs	Anoctamin	Dorsal + Ventral Tl10B spn27A (9)
1865	P08630	P08630	Btk29A	Tyrosine-protein kinase Btk29A	Dorsal + Ventral Tl10B spn27A (9)
1893	P13607;E1JIR4;A0A0B4KGG8	P13607;E1JIR4;A0A0B4KGG8	Atpalpha	Sodium/potassium-transporting ATPase subunit alpha	Dorsal + Ventral Tl10B spn27A (9)
1930	P20353	P20353	Galphai	G protein alpha i subunit	Dorsal + Ventral Tl10B spn27A (9)
1948	P23128	P23128	me31B	Putative ATP-dependent RNA helicase me31b	Dorsal + Ventral Tl10B spn27A (9)
1949	Q8IMF5;P23226	Q8IMF5;P23226	Map205	205 kDa microtubule-associated protein	Dorsal + Ventral Tl10B spn27A (9)
1953	P23625	P23625	Galphaq	G protein alpha q subunit	Dorsal + Ventral Tl10B spn27A (9)
1962	P25158;A0A126GUR4	P25158	osk	Maternal effect protein oskar	Dorsal + Ventral Tl10B spn27A (9)
1974	P26675	P26675	Sos	Protein son of sevenless	Dorsal + Ventral Tl10B spn27A (9)
1990	X2J5G6;P32100	X2J5G6;P32100	RpL7	60S ribosomal protein L7	Dorsal + Ventral Tl10B spn27A (9)
1994	P32845	P32845	nullo	Protein nullo	Dorsal + Ventral Tl10B spn27A (9)
2020	X2JGM9;P41042	X2JGM9;P41042	RpS4	40S ribosomal protein S4	Dorsal + Ventral Tl10B spn27A (9)
2024	X2JFR6;P41374	X2JFR6;P41374	eIF-2alpha	Eukaryotic translation initiation factor 2 subunit 1	Dorsal + Ventral Tl10B spn27A (9)
2039	P45890	P45890	Arp6	Actin-related protein 6	Dorsal + Ventral Tl10B spn27A (9)
2040	P45975	P45975	Su(var)3-9	Histone-lysine N-methyltransferase Su(var)3-9	Dorsal + Ventral Tl10B spn27A (9)
2041	X2JCS6;P46223	X2JCS6;P46223	RpL7A	60S ribosomal protein L7a	Dorsal + Ventral Tl10B spn27A (9)
2104	P56538	P56538	eIF6	Eukaryotic translation initiation factor 6	Dorsal + Ventral Tl10B spn27A (9)
2113	P83102	P83102	Dyrk3	Putative dual specificity tyrosine-phosphorylation-regulated kinase 3 homolog	Dorsal + Ventral Tl10B spn27A (9)
2141	Q04652	Q04652	kel	Ring canal kelch protein;Kelch short protein	Dorsal + Ventral Tl10B spn27A (9)
2159	Q0E8E8	Q0E8E8	Mpcp		Dorsal + Ventral Tl10B spn27A (9)
2166	Q0E8K6	Q0E8K6	Mkp-RB	tRNA pseudouridine synthase	Dorsal + Ventral Tl10B spn27A (9)
2168	Q0E8N2;Q9V9Q6	Q0E8N2;Q9V9Q6	step		Dorsal + Ventral Tl10B spn27A (9)
2170	Q0E8Q6;Q8SYW8	Q0E8Q6;Q8SYW8	BG:DS00797.6		Dorsal + Ventral Tl10B spn27A (9)
2220	Q1LZ24	Q1LZ24			Dorsal + Ventral Tl10B spn27A (9)
2233	T2FFI3;Q24087	T2FFI3;Q24087	mei-9	DNA repair endonuclease XPF	Dorsal + Ventral Tl10B spn27A (9)
2243	Q24157	Q24157	brn	Beta-1,3-galactosyltransferase brn	Dorsal + Ventral Tl10B spn27A (9)
[truncated: 1,399 more rows]

## Sheet: Phosphoproteomics_Clustering
Phospho_ID	Uniprot ID	Mayority Protein ID	Protein Name	Gene Name	DV Cluster	Phosphosite Aminoacid	Phosphosite Position
960	A0A0B4KHP8	A0A0B4KHP8	Uncharacterized protein CG4449	CG4449-RA;CG4449	Dorsal (1)	S	227
13086	Q9VQD6	Q9VQD6		Elba2	Dorsal (1)	T	228
12254	Q05913	Q05913	General transcription factor IIF subunit 1	TfIIFalpha	Dorsal (1)	T	457
1079	A0A0B4LEV8	A0A0B4LEV8		coil	Dorsal (1)	S	177
1205	A0A0B4LFY0	A0A0B4LFY0	Protein three rows	thr	Dorsal (1)	S	1205
1320	A0A0B4LHR3	A0A0B4LHR3		XNP	Dorsal (1)	S	5
1584	A1Z968	A1Z968		NAT1	Dorsal (1)	S	143
1923	A4V3W2	A4V3W2	Protein kinase shaggy	sgg	Dorsal (1)	S	9
2887	E4NKG1	E4NKG1	Caprin homolog	Capr	Dorsal (1)	S	144
2930	G4LTX1	G4LTX1	Transmembrane protein 11 homolog, mitochondrial	PGRP-LD-RB;Pmi	Dorsal (1)	S	24
4050	M9PHL0	M9PHL0	Supporter of activation of yellow protein	e(y)3	Dorsal (1)	S	889
4197	O16810	O16810	Origin recognition complex subunit 1	Orc1	Dorsal (1)	S	233
5016	Q24311	Q24311	Cullin homolog 1	lin19	Dorsal (1)	S	4
5044	Q24478	Q24478	Centrosome-associated zinc finger protein CP190	Cp190	Dorsal (1)	S	879
5485	Q7K1V0	Q7K1V0			Dorsal (1)	S	155
5642	Q7KMH9	Q7KMH9		wde	Dorsal (1)	S	756
5808	Q7KTS2	Q7KTS2		Atg17	Dorsal (1)	S	799
6929	Q9V3C0	Q9V3C0	ATP-dependent RNA helicase abstrakt	abs	Dorsal (1)	S	11
6995	Q9V3P3	Q9V3P3		REG	Dorsal (1)	S	75
7158	Q9V4P1	Q9V4P1	Actin-binding protein anillin	scra	Dorsal (1)	S	714
7713	Q9VD26	Q9VD26	Zinc finger protein-like 1 homolog	CG5382	Dorsal (1)	S	215
8513	Q9VL18	Q9VL18	Probable elongation factor 1-delta	eEF1delta	Dorsal (1)	S	37
8702	Q9VN21	Q9VN21		lost	Dorsal (1)	S	347
9150	Q9VRV1	Q9VRV1			Dorsal (1)	S	546
9499	X2JCY2	X2JCY2	CTP synthase	CTPsyn	Dorsal (1)	S	611
9572	Q9VV79	Q9VV79		spd-2	Dorsal (1)	S	649
10267	Q9W0P8	Q9W0P8	Mediator of RNA polymerase II transcription subunit 14	MED14	Dorsal (1)	S	615
10897	Q9W5R5	Q9W5R5		Slmap	Dorsal (1)	S	559
11049	X2J8R0	X2J8R0	Septin-interacting protein 1	sip1	Dorsal (1)	S	47
11447	Q9N6D7	Q9N6D7		hrg	Dorsal (1)	T	607
11449	Q9N6D7	Q9N6D7		hrg	Dorsal (1)	T	610
12098	O16043	O16043		Df31	Dorsal (1)	T	65
12104	O16810	O16810	Origin recognition complex subunit 1	Orc1	Dorsal (1)	T	419
12189	P26019	P26019	DNA polymerase alpha catalytic subunit	DNApol-alpha180	Dorsal (1)	T	315
13309	Q9VZ60	Q9VZ60			Dorsal (1)	T	985
13249	Q9VWV2	Q9VWV2		CG32549-RF	Dorsal (1)	T	8
13158	Q9VU43	Q9VU43		SRm160	Dorsal (1)	T	253
13464	Q9XZ34	Q9XZ34		Rif1	Dorsal (1)	T	1032
13347	Q9W1H5	Q9W1H5		DCP1	Dorsal (1)	T	177
13078	Q9VPR5	Q9VPR5			Dorsal (1)	T	336
13121	Q9VRP5	Q9VRP5	Ubiquitin carboxyl-terminal hydrolase 36	scny	Dorsal (1)	T	825
13028	Q9VN21	Q9VN21		lost	Dorsal (1)	T	345
13025	Q9VN21	Q9VN21		lost	Dorsal (1)	T	370
13004	Q9VME5	Q9VME5		slam	Dorsal (1)	T	754
12889	Q9VHC8	Q9VHC8			Dorsal (1)	T	135
12844	Q9VEJ1	Q9VEJ1		SF1	Dorsal (1)	T	328
12834	Q9VDW6	Q9VDW6	Dystrophin, isoforms A/C/F/G/H	Dys	Dorsal (1)	T	1186
12718	Q9V677	Q9V677	Proteasome-associated protein ECM29 homolog	CG8858	Dorsal (1)	T	1691
12685	Q9V3H9	Q9V3H9		Nab2	Dorsal (1)	T	625
12603	Q8SXS0	Q8SXS0			Dorsal (1)	T	281
12521	Q8INM3	Q8INM3	Protein slender lobes;Slender lobes-like protein	sle;CG12592	Dorsal (1)	T	943
12495	Q9VLL3;Q8IPF5	Q9VLL3		Akap200	Dorsal (1)	T	111
12421	Q7KM15	Q7KM15	Transcription factor BTF3	bic	Dorsal (1)	T	157
12406	Q7K3H0	Q7K3H0		Pi3K68D	Dorsal (1)	T	87
12222	P46863	P46863	Bipolar kinesin KRP-130	Klp61F	Dorsal (1)	T	933
12109	O16810	O16810	Origin recognition complex subunit 1	Orc1	Dorsal (1)	T	463
12089	M9W963	M9W963	Protein suppressor of sable	su(s)	Dorsal (1)	T	664
12069	M9PHL0	M9PHL0	Supporter of activation of yellow protein	e(y)3	Dorsal (1)	T	903
11919	M9NDA1	M9NDA1		Mbs	Dorsal (1)	T	592
11911	M9NCM6	M9NCM6	Protein split ends	spen	Dorsal (1)	T	4823
11802	E1JGV6	E1JGV6	H/ACA ribonucleoprotein complex subunit 4	Nop60B	Dorsal (1)	T	430
11776	Q9VI18	Q9VI18		BcDNA:LD21969	Dorsal (1)	T	317
11765	B7Z0I8	B7Z0I8			Dorsal (1)	T	534
11701	B5RJJ4	B5RJJ4			Dorsal (1)	T	192
11670	Q0E8U6	Q0E8U6		CG7337-RB;CG7337-RA	Dorsal (1)	T	1234
11669	A8DYJ2	A8DYJ2	Protein hu-li tai shao	hts	Dorsal (1)	T	586
11604	A1Z968	A1Z968		NAT1	Dorsal (1)	T	1061
11541	A0A0B4LGB7	A0A0B4LGB7	Calcium-transporting ATPase;Calcium-transporting ATPase sarcoplasmic/endoplasmic reticulum type	Ca-P60A	Dorsal (1)	T	242
11521	A1Z7J7	A1Z7J7		Sec31	Dorsal (1)	T	999
11461	Q9VC89	Q9VC89			Dorsal (1)	T	320
11383	A0A0B4KEH0	A0A0B4KEH0	14-3-3 protein zeta	14-3-3zeta	Dorsal (1)	T	3
11368	A0A0B4K7Y7	A0A0B4K7Y7	La-related protein 1	larp	Dorsal (1)	T	981
11257	X2JE45	X2JE45	Non-lysosomal glucosylceramidase	CG33090	Dorsal (1)	S	486
11124	Q9Y1T2	Q9Y1T2		Apc2	Dorsal (1)	S	614
11098	Q9Y145	Q9Y145		BcDNA.GH04978	Dorsal (1)	S	467
11095	Q9Y145	Q9Y145		BcDNA.GH04978	Dorsal (1)	S	496
11012	Q9XZ34	Q9XZ34		Rif1	Dorsal (1)	S	959
11002	Q9XZ29	Q9XZ29	Kinesin-like protein	Klp3A	Dorsal (1)	S	569
10995	Q9XZ22	Q9XZ22			Dorsal (1)	S	506
10993	Q9XZ22	Q9XZ22			Dorsal (1)	S	456
10977	Q9XZ21	Q9XZ21		snama	Dorsal (1)	S	650
10976	Q9XZ21	Q9XZ21		snama	Dorsal (1)	S	648
10960	Q9XZ21	Q9XZ21		snama	Dorsal (1)	S	768
10957	Q9XZ21	Q9XZ21		snama	Dorsal (1)	S	742
10939	Q9XYZ6	Q9XYZ6			Dorsal (1)	S	565
10808	Q9W4M7	Q9W4M7		tyf	Dorsal (1)	S	1181
10774	Q9W4C3	Q9W4C3	Ubiquitin carboxyl-terminal hydrolase	Usp16-45	Dorsal (1)	S	35
10766	Q9W485	Q9W485		IntS6	Dorsal (1)	S	1151
10703	Q9W3Y3	Q9W3Y3			Dorsal (1)	S	210
10700	Q9W3Y0	Q9W3Y0	Zinc finger protein 593 homolog	CG3224	Dorsal (1)	S	146
10625	Q9W3J6	Q9W3J6		CG17982-RA	Dorsal (1)	S	35
10592	Q9W3D1	Q9W3D1		Caf1-180	Dorsal (1)	S	475
10556	Q9W363	Q9W363		mxc	Dorsal (1)	S	1610
10542	Q9W362	Q9W362		Larp7	Dorsal (1)	S	304
10522	Q9W2X6	Q9W2X6		ATPsyndelta	Dorsal (1)	S	131
10503	Q9W2U7	Q9W2U7		nocte	Dorsal (1)	S	1243
10502	Q9W2U7	Q9W2U7		nocte	Dorsal (1)	S	1241
10451	Q9W2M0	Q9W2M0		Rbpn-5	Dorsal (1)	S	241
10447	Q9W2M0	Q9W2M0		Rbpn-5	Dorsal (1)	S	180
10434	Q9W298	Q9W298			Dorsal (1)	S	9
10354	Q9W1H5	Q9W1H5		DCP1	Dorsal (1)	S	269
10351	Q9W1H5	Q9W1H5		DCP1	Dorsal (1)	S	239
10348	Q9W1H4	Q9W1H4	DNA ligase 1	DNA-ligI	Dorsal (1)	S	60
10211	Q9W019	Q9W019			Dorsal (1)	S	119
10154	Q9VZ60	Q9VZ60			Dorsal (1)	S	987
10106	Q9VYY7	Q9VYY7		HP5	Dorsal (1)	S	74
10105	Q9VYY7	Q9VYY7		HP5	Dorsal (1)	S	71
10066	Q9VYV4	Q9VYV4		Amun	Dorsal (1)	S	274
10040	X2JEX7	X2JEX7	Ubiquitin carboxyl-terminal hydrolase;Ubiquitin carboxyl-terminal hydrolase 7	Usp7	Dorsal (1)	S	1113
9998	Q9VYA4	Q9VYA4			Dorsal (1)	S	305
9972	Q9VY91	Q9VY91		Pdcd4	Dorsal (1)	S	493
9964	Q9VY54	Q9VY54		l(1)G0007	Dorsal (1)	S	447
9935	Q9VXU6	Q9VXU6		mh	Dorsal (1)	S	431
9925	X2JF83	X2JF83			Dorsal (1)	S	514
9901	Q9VXH3	Q9VXH3	Phosphoinositide phospholipase C	sl	Dorsal (1)	S	491
9900	Q9VXH3	Q9VXH3	Phosphoinositide phospholipase C	sl	Dorsal (1)	S	490
9892	Q9VXG1	Q9VXG1	Zinc finger protein hangover	hang	Dorsal (1)	S	832
9855	X2JFW6	X2JFW6			Dorsal (1)	S	21
9810	X2JFP6	X2JFP6		Rip11	Dorsal (1)	S	244
9804	Q9VWQ3	Q9VWQ3			Dorsal (1)	S	337
9709	Q9VWD7	Q9VWD7			Dorsal (1)	S	11
9650	Q9VVW2	Q9VVW2			Dorsal (1)	S	543
9633	X2J969	X2J969	Mediator of RNA polymerase II transcription subunit 19	MED19	Dorsal (1)	S	30
9623	Q9VVG9	Q9VVG9			Dorsal (1)	S	485
9481	Q9VUE5	Q9VUE5		stwl	Dorsal (1)	S	790
9320	Q9VTK7	Q9VTK7			Dorsal (1)	S	568
9259	Q9VT61	Q9VT61			Dorsal (1)	S	805
9215	Q9VSK9	Q9VSK9			Dorsal (1)	S	190
9178	Q9VS50	Q9VS50	N-acetyltransferase eco	eco	Dorsal (1)	S	312
9166	Q9VS45	Q9VS45		RhoGEF4	Dorsal (1)	S	409
9140	Q9VRP5	Q9VRP5	Ubiquitin carboxyl-terminal hydrolase 36	scny	Dorsal (1)	S	744
9084	Q9VR19	Q9VR19		Elba3	Dorsal (1)	S	329
9077	Q9VR17	Q9VR17		Bsg25A	Dorsal (1)	S	43
9068	Q9VQZ8	Q9VQZ8			Dorsal (1)	S	639
9046	Q9VQM0	Q9VQM0		toc	Dorsal (1)	S	1041
9042	Q9VQK5	Q9VQK5			Dorsal (1)	S	662
8996	Q9VQ78	Q9VQ78			Dorsal (1)	S	174
8991	Q9VQ58	Q9VQ58		CG15356-RA	Dorsal (1)	S	981
8955	Q9VPR5	Q9VPR5			Dorsal (1)	S	66
8943	Q9VPM5	Q9VPM5		mbm	Dorsal (1)	S	332
8866	Q9VP05	Q9VP05	Mediator of RNA polymerase II transcription subunit 1	MED1	Dorsal (1)	S	863
8843	Q9VNW1	Q9VNW1			Dorsal (1)	S	21
8822	Q9VNH6	Q9VNH6	Exocyst complex component 4	sec8	Dorsal (1)	S	456
8735	Q9VN82	Q9VN82		cno	Dorsal (1)	S	500
8726	Q9VN82	Q9VN82		cno	Dorsal (1)	S	1740
8685	X2J4N6	X2J4N6	Putative elongator complex protein 4	CG6907	Dorsal (1)	S	184
8566	Q9VLD6	Q9VLD6	Borealin	borr	Dorsal (1)	S	244
8488	Q9VKU7	Q9VKU7	Gamma-tubulin complex component 4 homolog	Grip75	Dorsal (1)	S	212
8467	Q9VKK1	Q9VKK1	Enhancer of mRNA-decapping protein 4 homolog	Ge-1	Dorsal (1)	S	555
8315	Q9VJ57	Q9VJ57		Grip71	Dorsal (1)	S	456
8307	X2J6U8	X2J6U8		ssp3	Dorsal (1)	S	288
8231	Q9VIK6	Q9VIK6		Cen	Dorsal (1)	S	172
8143	Q9VHT3	Q9VHT3		Sgt1	Dorsal (1)	S	132
8139	Q9VHR6	Q9VHR6	Autophagy-related protein 13 homolog	Atg13	Dorsal (1)	S	368
8118	Q9VHL2	Q9VHL2		Tcp-1eta	Dorsal (1)	S	521
8083	Q9VHC8	Q9VHC8			Dorsal (1)	S	46
8077	Q9VHC7	Q9VHC7		rump	Dorsal (1)	S	11
8047	Q9VH82	Q9VH82			Dorsal (1)	S	177
7997	Q9VGI8	Q9VGI8	Bloom syndrome protein homolog	Blm	Dorsal (1)	S	288
7992	Q9VGI8	Q9VGI8	Bloom syndrome protein homolog	Blm	Dorsal (1)	S	182
7982	Q9VGI5	Q9VGI5		Lk6	Dorsal (1)	S	54
7958	Q9VG62	Q9VG62		trus	Dorsal (1)	S	355
7895	Q9VF03	Q9VF03		mor	Dorsal (1)	S	335
7890	Q9VF03	Q9VF03		mor	Dorsal (1)	S	309
7884	Q9VF03	Q9VF03		mor	Dorsal (1)	S	372
7880	Q9VEV7	Q9VEV7			Dorsal (1)	S	419
7873	Q9VEV3	Q9VEV3			Dorsal (1)	S	7
7795	Q9VDW6	Q9VDW6	Dystrophin, isoforms A/C/F/G/H;Dystrophin, isoform B;Dystrophin, isoform D;Dystrophin, isoform E	Dys	Dorsal (1)	S	3430
7792	Q9VDW6	Q9VDW6	Dystrophin, isoforms A/C/F/G/H	Dys	Dorsal (1)	S	1184
7787	Q9VDQ4	Q9VDQ4		trem	Dorsal (1)	S	251
7762	Q9VDG2	Q9VDG2	RalA-binding protein 1	Rlip	Dorsal (1)	S	78
7750	Q9VDE5	Q9VDE5	Protein Peter pan	ppan	Dorsal (1)	S	237
7676	Q9VCP0	Q9VCP0	Transcription elongation factor B polypeptide 3	EloA	Dorsal (1)	S	119
7620	Q9VCC0	Q9VCC0	Cysteine and histidine-rich domain-containing protein	CHORD	Dorsal (1)	S	324
7551	Q9VC60	Q9VC60			Dorsal (1)	S	306
7523	Q9VC58	Q9VC58		Syx18	Dorsal (1)	S	266
7472	Q9VC08	Q9VC08		Mink	Dorsal (1)	S	59
7357	Q9VB22	Q9VB22		pins	Dorsal (1)	S	436
7348	Q9VAZ0	Q9VAZ0		CG5003-RA	Dorsal (1)	S	402
7347	Q9VAZ0	Q9VAZ0		CG5003-RA	Dorsal (1)	S	400
7334	Q9VAW1	Q9VAW1		Moca-cyp	Dorsal (1)	S	291
7182	Q9V6K1	Q9V6K1	Tripeptidyl-peptidase 2	TppII	Dorsal (1)	S	1167
7175	Q9V597	Q9V597	60S ribosomal protein L31	RpL31	Dorsal (1)	S	95
7145	Q9V4D4	Q9V4D4		bip2	Dorsal (1)	S	251
7112	Q9V468	Q9V468	Zinc finger matrin-type protein CG9776	CG9776	Dorsal (1)	S	1232
7111	Q9V468	Q9V468	Zinc finger matrin-type protein CG9776	CG9776	Dorsal (1)	S	1230
7078	Q9V426	Q9V426		vig	Dorsal (1)	S	261
7025	Q9V3V6	Q9V3V6		Rpt5	Dorsal (1)	S	98
7005	Q9V3V0	Q9V3V0		x16	Dorsal (1)	S	204
7004	Q9V3V0	Q9V3V0		x16	Dorsal (1)	S	199
6986	Q9V3H9	Q9V3H9		Nab2	Dorsal (1)	S	764
6977	Q9V3H9	Q9V3H9		Nab2	Dorsal (1)	S	391
6976	Q9V3H9	Q9V3H9		Nab2	Dorsal (1)	S	389
6975	Q9V3H9	Q9V3H9		Nab2	Dorsal (1)	S	173
6973	Q9V3H9	Q9V3H9		Nab2	Dorsal (1)	S	626
6972	Q9V3H9	Q9V3H9		Nab2	Dorsal (1)	S	624
6906	Q9U4G5	Q9U4G5		Axud1	Dorsal (1)	S	234
6883	Q9NBD7	Q9NBD7	CLIP-associating protein	chb	Dorsal (1)	S	668
6881	Q9NBD7	Q9NBD7	CLIP-associating protein	chb	Dorsal (1)	S	664
6861	Q9I7K0	Q9I7K0	Microtubule-associated protein Jupiter	Jupiter	Dorsal (1)	S	150
6830	Q9GQN5	Q9GQN5	Transcriptional regulator ATRX homolog	XNP	Dorsal (1)	S	238
6797	Q960X8	Q960X8	Hepatocyte growth factor-regulated tyrosine kinase substrate	Hrs	Dorsal (1)	S	300
6791	Q960T2	Q960T2	Synapse-associated protein of 47 kDa	Sap47	Dorsal (1)	S	182
6768	Q960D3	Q960D3		vig2	Dorsal (1)	S	72
6713	Q94883	Q94883		Dref	Dorsal (1)	S	8
6596	Q8T0L3	Q8T0L3		Uba1	Dorsal (1)	S	114
6553	Q8SXI2	Q8SXI2		Yeti	Dorsal (1)	S	77
6516	Q8SWR8	Q8SWR8	Ataxin-2 homolog	Atx2	Dorsal (1)	S	25
6473	Q8MSC4	Q8MSC4		BigH1	Dorsal (1)	S	288
6424	Q8MMD2	Q8MMD2		Eps-15;Eps-15-RB	Dorsal (1)	S	242
6364	Q8IRB5	Q8IRB5	Claspin homolog	CG32251	Dorsal (1)	S	49
6361	Q8IRB5	Q8IRB5	Claspin homolog	CG32251	Dorsal (1)	S	1287
6293	Q8T0E7	Q8T0E7			Dorsal (1)	S	312
6204	Q8INM3	Q8INM3	Protein slender lobes;Slender lobes-like protein	sle;CG12592	Dorsal (1)	S	999
6185	Q8INM3	Q8INM3	Protein slender lobes	sle	Dorsal (1)	S	1229
6183	Q8INM3	Q8INM3	Protein slender lobes;Slender lobes-like protein	sle;CG12592	Dorsal (1)	S	889
6178	Q8INM3	Q8INM3	Protein slender lobes	sle	Dorsal (1)	S	612
6155	Q8INM3	Q8INM3	Protein slender lobes	sle	Dorsal (1)	S	560
6120	Q9VFH2	Q9VFH2		Hexim	Dorsal (1)	S	337
6043	Q86BS3	Q86BS3		Chro	Dorsal (1)	S	380
6030	Q86BP6	Q86BP6		elg1	Dorsal (1)	S	417
6019	Q9VLL3;Q8IPF5	Q9VLL3		Akap200	Dorsal (1)	S	120
6005	X2JKW3	X2JKW3	Probable ATP-dependent RNA helicase CG8611	CG8611	Dorsal (1)	S	93
5941	Q7YZ95	Q7YZ95		Skp2	Dorsal (1)	S	165
5887	Q7KVX5	Q7KVX5		Vap-33A	Dorsal (1)	S	193
5858	Q9VT60	Q9VT60		iPLA2-VIA	Dorsal (1)	S	537
5857	Q9VT60	Q9VT60		iPLA2-VIA	Dorsal (1)	S	534
5849	Q7KUA4	Q7KUA4		Uba2	Dorsal (1)	S	653
5812	Q7KTV5	Q7KTV5		Nopp140	Dorsal (1)	S	632
5806	Q7KTS2	Q7KTS2		Atg17	Dorsal (1)	S	796
5750	Q7KSD3	Q7KSD3		fray	Dorsal (1)	S	386
5749	Q7KSD3	Q7KSD3		fray	Dorsal (1)	S	384
5748	Q7KSD3	Q7KSD3		fray	Dorsal (1)	S	383
5737	Q9VB04	Q9VB04		btz	Dorsal (1)	S	122
5723	Q7KRW8	Q7KRW8	Pre-mRNA-processing factor 39	CG1646	Dorsal (1)	S	252
5718	Q8IMG3	Q8IMG3			Dorsal (1)	S	987
5702	Q7KQM6	Q7KQM6	PERQ amino acid-rich with GYF domain-containing protein CG11148	CG11148	Dorsal (1)	S	1407
5698	Q7KQM6	Q7KQM6	PERQ amino acid-rich with GYF domain-containing protein CG11148	CG11148	Dorsal (1)	S	416
5640	Q7KMH9	Q7KMH9		wde	Dorsal (1)	S	749
5600	Q7K556	Q7K556		CG5544	Dorsal (1)	S	58
5599	Q7K556	Q7K556		CG5544	Dorsal (1)	S	42
5582	Q7K4L8	Q7K4L8			Dorsal (1)	S	2
5441	Q7K0L8	Q7K0L8		FLASH	Dorsal (1)	S	68
5413	Q7JZ25	Q7JZ25	Chloride channel protein	ClC-b	Dorsal (1)	S	15
5396	Q7JWH5	Q7JWH5		Roc2	Dorsal (1)	S	8
5391	Q7JW61	Q7JW61	Ubiquitin carboxyl-terminal hydrolase	Usp20-33	Dorsal (1)	S	61
5317	Q7JQN4	Q7JQN4		Rs1	Dorsal (1)	S	108
5316	Q7JQN4	Q7JQN4		Rs1	Dorsal (1)	S	103
5315	Q7JQN4	Q7JQN4		Rs1	Dorsal (1)	S	100
5291	Q7JQU9	Q7JQU9			Dorsal (1)	S	340
5244	Q5BI31	Q5BI31			Dorsal (1)	S	116
5243	Q5BI31	Q5BI31			Dorsal (1)	S	114
5194	Q4QQ01	Q4QQ01			Dorsal (1)	S	2
5193	Q4QQ01	Q4QQ01			Dorsal (1)	S	9
5060	Q24478	Q24478	Centrosome-associated zinc finger protein CP190	Cp190	Dorsal (1)	S	723
5043	Q24478	Q24478	Centrosome-associated zinc finger protein CP190	Cp190	Dorsal (1)	S	866
5042	Q24478	Q24478	Centrosome-associated zinc finger protein CP190	Cp190	Dorsal (1)	S	863
4994	Q24154	Q24154	60S ribosomal protein L29	RpL29	Dorsal (1)	S	56
4991	Q53ZT0	Q53ZT0	DnaJ protein homolog 1	DnaJ-1	Dorsal (1)	S	187
4912	Q0E8J0	Q0E8J0		MEP-1	Dorsal (1)	S	25
4879	Q05913	Q05913	General transcription factor IIF subunit 1	TfIIFalpha	Dorsal (1)	S	482
4843	P98159	P98159	Serine protease nudel	ndl	Dorsal (1)	S	581
4842	P98159	P98159	Serine protease nudel	ndl	Dorsal (1)	S	574
4829	P91927	P91927	LETM1 and EF-hand domain-containing protein anon-60Da, mitochondrial	Letm1	Dorsal (1)	S	538
4816	P83103	P83103	Putative serine/threonine-protein kinase haspin homolog	Haspin	Dorsal (1)	S	203
4741	P48592	P48592	Ribonucleoside-diphosphate reductase subunit M2	RnrS	Dorsal (1)	S	27
4739	P48592	P48592	Ribonucleoside-diphosphate reductase subunit M2	RnrS	Dorsal (1)	S	18
4738	P48591	P48591	Ribonucleoside-diphosphate reductase large subunit	RnrL	Dorsal (1)	S	782
4714	P42283	P42283	'Longitudinals lacking protein, isoform G;Longitudinals lacking protein, isoforms H/M/V;Longitudinals lacking protein, isoforms A...' <Preview truncated at 128 characters>	lola	Dorsal (1)	S	375
4697	P40796	P40796	La protein homolog	La	Dorsal (1)	S	9
4685	P39768	P39768	Pair-rule protein odd-paired	opa	Dorsal (1)	S	434
4679	P35600	P35600	Replication factor C subunit 1	Gnf1	Dorsal (1)	S	156
4678	P35600	P35600	Replication factor C subunit 1	Gnf1	Dorsal (1)	S	154
4619	P29746	P29746	Protein bangles and beads	bnb	Dorsal (1)	S	436
4614	P29746	P29746	Protein bangles and beads	bnb	Dorsal (1)	S	192
4585	P25823	P25823	Maternal protein tudor	tud	Dorsal (1)	S	916
4532	P20439	P20439	G2/mitotic-specific cyclin-B	CycB	Dorsal (1)	S	151
4496	P15348	P15348	DNA topoisomerase 2	Top2	Dorsal (1)	S	1392
4481	P13496	P13496	Dynactin subunit 1	Gl	Dorsal (1)	S	138
4424	P06605	P06605	Tubulin alpha-3 chain;Tubulin alpha-1 chain	alphaTub84D;alphaTub84B	Dorsal (1)	S	48
4408	P05084	P05084	Protein hunchback	hb	Dorsal (1)	S	219
4274	O61345	O61345	Protein penguin	pen	Dorsal (1)	S	17
4238	Q7KW02	Q7KW02		east	Dorsal (1)	S	834
4196	O16810	O16810	Origin recognition complex subunit 1	Orc1	Dorsal (1)	S	232
4193	O16797	O16797	60S ribosomal protein L3	RpL3	Dorsal (1)	S	13
4151	N0D8I3	N0D8I3	Transcription elongation factor SPT6	Spt6	Dorsal (1)	S	7
4112	Q9VPB2	Q9VPB2		Spc105R	Dorsal (1)	S	383
4096	Q9VVW6	Q9VVW6		MESR6	Dorsal (1)	S	26
4082	Q9VTY8	Q9VTY8		sti	Dorsal (1)	S	1363
3990	M9PGW8	M9PGW8		bif	Dorsal (1)	S	207
3976	Q7YU15	Q7YU15		klar	Dorsal (1)	S	528
3962	M9PGH6	M9PGH6	Regulator of telomere elongation helicase 1 homolog	CG4078	Dorsal (1)	S	872
3885	M9PFZ1;Q7KTV5	Q7KTV5		Nopp140	Dorsal (1)	S	138
3860	M9PFZ1;Q7KTV5	Q7KTV5		Nopp140	Dorsal (1)	S	355
3859	M9PFZ1;Q7KTV5	Q7KTV5		Nopp140	Dorsal (1)	S	352
3853	M9PFZ1;Q7KTV5	Q7KTV5		Nopp140	Dorsal (1)	S	257
3821	M9PFM5	M9PFM5	ATP-dependent helicase brm	brm	Dorsal (1)	S	1372
3806	M9PF24	M9PF24	Kinesin light chain	Klc	Dorsal (1)	S	501
3745	Q8SX64	Q8SX64		Girdin	Dorsal (1)	S	481
3717	M9PD95	M9PD95	NF-kappa-B inhibitor cactus	cact	Dorsal (1)	S	468
3706	M9PIH3	M9PIH3		Wnk	Dorsal (1)	S	1545
3642	M9PCV9	M9PCV9	Charged multivesicular body protein 5	Vps60;CG6259	Dorsal (1)	S	86
3640	M9PCQ8	M9PCQ8	Insulin receptor substrate 1	chico	Dorsal (1)	S	555
3634	M9PCN6	M9PCN6	Protein numb	numb	Dorsal (1)	S	343
3540	M9PBH9	M9PBH9	Protein zer-1 homolog	CG12084	Dorsal (1)	S	301
3490	M9PB57	M9PB57	Wee1-like protein kinase	Wee1;wee	Dorsal (1)	S	87
3337	M9NE89	M9NE89	Lamin Dm0	Lam	Dorsal (1)	S	595
3275	M9NDL7	M9NDL7		Reps	Dorsal (1)	S	750
3247	M9ND37	M9ND37		eIF5B	Dorsal (1)	S	20
3225	M9NCX1	M9NCX1	Lethal(2) giant larvae protein	l(2)gl	Dorsal (1)	S	664
3117	M9MS15	M9MS15	Neurotactin	Nrt	Dorsal (1)	S	256
3012	L0MLP2	L0MLP2	Calcium/calmodulin-dependent protein kinase type II alpha chain	CaMKII	Dorsal (1)	S	332
3003	M9MQH9	M9MQH9	Serine/threonine-protein phosphatase PP2A 65 kDa regulatory subunit	Pp2A-29B	Dorsal (1)	S	7
2980	M9NDX8	M9NDX8		Spn	Dorsal (1)	S	702
2915	Q8IRC1	Q8IRC1		ens	Dorsal (1)	S	236
2893	E4NKG1	E4NKG1	Caprin homolog	Capr	Dorsal (1)	S	282
2878	E2QD64	E2QD64	Bifunctional lysine-specific demethylase and histidyl-hydroxylase NO66	CG2982	Dorsal (1)	S	44
2823	E2QC56	E2QC56	Probable protein phosphatase CG10417	CG10417	Dorsal (1)	S	641
2610	E1JHE1	E1JHE1	Kinesin-like protein	Klp31E	Dorsal (1)	S	972
2604	E1JHA4	E1JHA4	Heterogeneous nuclear ribonucleoprotein 27C	Hrb27C	Dorsal (1)	S	182
2603	E1JHA4	E1JHA4	Heterogeneous nuclear ribonucleoprotein 27C	Hrb27C	Dorsal (1)	S	177
2570	D3PFH9	D3PFH9	Protein phosphatase Slingshot	ssh	Dorsal (1)	S	536
2514	C7LAG1;Q59E36	Q59E36	REST corepressor	CoRest	Dorsal (1)	S	22
2513	C7LAG1;Q59E36	Q59E36	REST corepressor	CoRest	Dorsal (1)	S	18
2498	X2J9A4	X2J9A4		Trp1	Dorsal (1)	S	153
2495	M9PHW9	M9PHW9	Cyclic AMP response element-binding protein B	CrebB	Dorsal (1)	S	198
2472	Q9VYL7	Q9VYL7			Dorsal (1)	S	318
2459	B7Z0V1	B7Z0V1	Transcription initiation factor TFIID subunit 7	Taf7	Dorsal (1)	S	335
2434	B7Z0I8	B7Z0I8			Dorsal (1)	S	850
2420	B7Z0I8	B7Z0I8			Dorsal (1)	S	518
2395	B7Z0I8	B7Z0I8			Dorsal (1)	S	466
2390	B7Z0I8	B7Z0I8			Dorsal (1)	S	2327
2373	B7Z0I8	B7Z0I8			Dorsal (1)	S	1962
2355	M9PFR5	M9PFR5	Possible lysine-specific histone demethylase 1	Su(var)3-3	Dorsal (1)	S	848
2329	B7Z0B0	B7Z0B0		sowah	Dorsal (1)	S	246
2285	B7Z002	B7Z002		kis	Dorsal (1)	S	1600
2244	B7Z002	B7Z002		kis	Dorsal (1)	S	1716
2222	B7YZZ9	B7YZZ9	Recombination repair protein 1	Rrp1	Dorsal (1)	S	395
2184	B7YZQ1	B7YZQ1		slik	Dorsal (1)	S	651
2160	B5RJJ4	B5RJJ4			Dorsal (1)	S	194
2135	Q9W3W1	Q9W3W1	Coronin	pod1	Dorsal (1)	S	575
2076	A8JQT5;REV__A8JQT5	-		Cdep	Dorsal (1)	S	NaN
2075	A8JQT5;Q9VQM0;REV__A8JQT5	Q9VQM0		Cdep;toc	Dorsal (1)	S	1038
2050	Q9V3C7	Q9V3C7		I-2	Dorsal (1)	S	6
1882	A4V2K7	A4V2K7	Chromosomal protein D1	D1	Dorsal (1)	S	102
1875	A4V2K7	A4V2K7	Chromosomal protein D1	D1	Dorsal (1)	S	299
1808	A1ZBW7	A1ZBW7	WASH complex subunit FAM21 homolog	CG16742	Dorsal (1)	S	1408
1777	A1ZBT6	A1ZBT6			Dorsal (1)	S	103
1776	A1ZBT6	A1ZBT6			Dorsal (1)	S	99
1721	B3DN64	B3DN64		CG30115-RD;GEFmeso	Dorsal (1)	S	626
1703	A1ZAT5	A1ZAT5		Tes	Dorsal (1)	S	5
1702	Q9NDR1	Q9NDR1		EDTP	Dorsal (1)	S	516
1685	A1ZAK7	A1ZAK7		Psi	Dorsal (1)	S	42
1679	Q8IFW6	Q8IFW6		Dek	Dorsal (1)	S	462
1671	Q8IFW6	Q8IFW6		Dek	Dorsal (1)	S	94
1666	Q8IFW6	Q8IFW6		Dek	Dorsal (1)	S	43
1643	A1Z9S6	A1Z9S6		Su(var)2-HP2	Dorsal (1)	S	1572
1594	A1Z968	A1Z968		NAT1	Dorsal (1)	S	116
1538	E1JH24	E1JH24			Dorsal (1)	S	1122
1478	A1Z6I7	A1Z6I7		BubR1	Dorsal (1)	S	565
1442	A1A708	A1A708	Uncharacterized protein CG4951	CG4951	Dorsal (1)	S	229
1441	A1A708	A1A708	Uncharacterized protein CG4951	CG4951	Dorsal (1)	S	227
1389	A0A0S0X2W5	A0A0S0X2W5		FDY	Dorsal (1)	S	72
1321	A0A0B4LIP5	A0A0B4LIP5		Lnk	Dorsal (1)	S	137
1311	A0A0B4LHI3	A0A0B4LHI3	Protein sarah	sra	Dorsal (1)	S	100
1298	Q8SX98	Q8SX98		Vrp1	Dorsal (1)	S	252
1290	A0A0B4LGZ6	A0A0B4LGZ6	E3 ubiquitin-protein ligase hyd	hyd	Dorsal (1)	S	2185
1261	A0A0B4LGT7	A0A0B4LGT7	Probable RNA methyltransferase CG1239	CG1239	Dorsal (1)	S	56
1215	A0A0B4LG36	A0A0B4LG36	High mobility group protein Z	HmgZ	Dorsal (1)	S	102
1183	A0A0B4LGV3	A0A0B4LGV3		MESR4	Dorsal (1)	S	150
1174	A0A0B4LFQ2	A0A0B4LFQ2		Incenp	Dorsal (1)	S	164
1169	A0A0B4LFQ2	A0A0B4LFQ2		Incenp	Dorsal (1)	S	546
1151	A0A0B4LFJ4	A0A0B4LFJ4	Transmembrane protein 131 homolog	CG8370	Dorsal (1)	S	1249
1101	A1Z9M4	A1Z9M4		cg	Dorsal (1)	S	96
1072	A0A0B4LEV2	A0A0B4LEV2	DNA replication licensing factor MCM4	dpa	Dorsal (1)	S	9
1036	Q9V9Y9	Q9V9Y9		spn-F	Dorsal (1)	S	23
1017	A0A0B4KHZ0	A0A0B4KHZ0		woc	Dorsal (1)	S	361
994	A0A0B4KHY8	A0A0B4KHY8			Dorsal (1)	S	845
923	A0A0B4LIK5	A0A0B4LIK5	Ubiquitin carboxyl-terminal hydrolase	puf	Dorsal (1)	S	3333
869	Q9VC89	Q9VC89			Dorsal (1)	S	322
865	Q9VC89	Q9VC89			Dorsal (1)	S	548
858	H1UUJ8	H1UUJ8	Myosin heavy chain 95F	jar-RG;jar	Dorsal (1)	S	1038
829	A0A0B4KH73	A0A0B4KH73			Dorsal (1)	S	554
740	Q9W1Y0	Q9W1Y0		CG3499-RC	Dorsal (1)	S	195
617	A0A0B4KF05	A0A0B4KF05	Vacuolar protein sorting-associated protein 28 homolog	Vps28	Dorsal (1)	S	5
517	A0A0B4KEI5	A0A0B4KEI5	Serrate RNA effector molecule homolog	Ars2	Dorsal (1)	S	345
515	E1JH23	E1JH23	Oxysterol-binding protein	CG1513-RA	Dorsal (1)	S	22
426	A0A0B4K7Y7	A0A0B4K7Y7	La-related protein 1	larp	Dorsal (1)	S	1263
417	A0A0B4K7Y7	A0A0B4K7Y7	La-related protein 1	larp	Dorsal (1)	S	284
407	A0A0B4LFF8	A0A0B4LFF8		RhoGEF2	Dorsal (1)	S	715
367	A1ZB80;A1ZB83;A1ZB79	A1ZB80		CG5174-RA	Dorsal (1)	S	201
357	A1ZB80	A1ZB80		CG5174-RA	Dorsal (1)	S	18
333	A0A0B4KHR8	A0A0B4KHR8	Ankyrin repeat and KH domain-containing protein mask	mask	Dorsal (1)	S	3542
309	A0A0B4K6W1	A0A0B4K6W1	Protein suppressor of hairy wing	su(Hw)	Dorsal (1)	S	124
238	Q9VG78	Q9VG78		pps	Dorsal (1)	S	1547
222	A0A0B4K6B8	A0A0B4K6B8	Modifier of mdg4	mod(mdg4)	Dorsal (1)	S	364
221	A0A0B4K6B8	A0A0B4K6B8	Modifier of mdg4	mod(mdg4)	Dorsal (1)	S	230
214	O46342	O46342		rpk	Dorsal (1)	S	10
136	E1JJ72	E1JJ72	Transcription initiation factor TFIID subunit 1	Taf1	Dorsal (1)	S	1332
125	A0A0B4JDC3	A0A0B4JDC3	Tetratricopeptide repeat protein 14 homolog	CG6621	Dorsal (1)	S	603
116	A0A0B4JD48	A0A0B4JD48	Cathepsin L;Cathepsin L heavy chain;Cathepsin L light chain	Cp1	Dorsal (1)	S	80
115	A0A0B4JD46	A0A0B4JD46	CCHC-type zinc finger protein CG3800	CG3800	Dorsal (1)	S	142
111	A0A0B4JD33	A0A0B4JD33		Su(var)2-10	Dorsal (1)	S	583
105	C8VV76	C8VV76		CG18659-RA	Dorsal (1)	S	487
81	A0A0B4LHQ4	A0A0B4LHQ4		ctrip	Dorsal (1)	S	228
77	A0A0B4JCV4	A0A0B4JCV4		tacc	Dorsal (1)	S	609
64	A0A0B4JCV4	A0A0B4JCV4		tacc	Dorsal (1)	S	255
13488	Q9Y145	Q9Y145		BcDNA.GH04978	Dorsal (1)	T	494
34	E5DK16	E5DK16		Lpin	Dorsal (1)	S	74
371	A0A0B4K7G4	A0A0B4K7G4	DNA-binding protein modulo	mod	Lateral (2)	S	129
2357	M9PFR5	M9PFR5	Possible lysine-specific histone demethylase 1	Su(var)3-3	Lateral (2)	S	60
6233	Q8INX3	Q8INX3	Protein TIPIN homolog	CG10336	Lateral (2)	S	195
6916	Q9UAS6	Q9UAS6	Cap-specific mRNA (nucleoside-2'-O-)-methyltransferase 2	cmtr2	Lateral (2)	S	5
6917	Q9UAS6	Q9UAS6	Cap-specific mRNA (nucleoside-2'-O-)-methyltransferase 2	cmtr2	Lateral (2)	S	6
7197	Q9V7P1	Q9V7P1	U3 small nucleolar RNA-associated protein 18 homolog	wcd	Lateral (2)	S	164
7198	Q9V7P1	Q9V7P1	U3 small nucleolar RNA-associated protein 18 homolog	wcd	Lateral (2)	S	165
7474	Q9VC08	Q9VC08		Mink	Lateral (2)	S	540
8160	Q9VI53	Q9VI53			Lateral (2)	S	33
9920	Q9VXQ5	Q9VXQ5		Tcp-1zeta	Lateral (2)	S	248
9922	X2JF83	X2JF83			Lateral (2)	S	490
10194	Q9VZS7	Q9VZS7			Lateral (2)	S	208
10659	X2JE07	X2JE07		CG1677-RA	Lateral (2)	S	831
12271	Q0KHR4	Q0KHR4		mei-218	Lateral (2)	T	219
12955	Q9VK85	Q9VK85		Elf	Lateral (2)	T	158
4278	O61613	O61613	Glycylpeptide N-tetradecanoyltransferase	Nmt	Lateral (2)	S	65
3613	M9PCC1	M9PCC1	Guanine nucleotide-binding protein subunit beta-like protein	Rack1	Lateral (2)	S	277
3851	M9PFY2	M9PFY2		CG6479-RA	Lateral (2)	S	9
6071	Q8I0A1;Q8SXT8;Q9VDD2	Q9VDD2		SNF4Agamma	Lateral (2)	S	1292
6058	Q86BY9	Q86BY9	Protein rigor mortis	rig	Lateral (2)	S	980
5959	Q7YZ99	Q7YZ99			Lateral (2)	S	389
5947	Q7YZ99	Q7YZ99			Lateral (2)	S	237
5946	Q7YZ99	Q7YZ99			Lateral (2)	S	236
5879	Q9W4C4	Q9W4C4		spoon	Lateral (2)	S	272
5867	Q7KV99	Q7KV99			Lateral (2)	S	240
5816	Q7KU01	Q7KU01		PNUTS	Lateral (2)	S	623
5681	Q7KN62	Q7KN62	Transitional endoplasmic reticulum ATPase TER94	TER94	Lateral (2)	S	716
5533	Q7K3D4	Q7K3D4			Lateral (2)	S	43
5492	Q7K1V1	Q7K1V1			Lateral (2)	S	210
5429	Q7K0D8	Q7K0D8		Nup50	Lateral (2)	S	53
5409	Q7JXZ2	Q7JXZ2		Eip55E	Lateral (2)	S	2
5401	Q7JWS8	Q7JWS8		Mtl	Lateral (2)	S	2
4105	M9PIC3	M9PIC3			Lateral (2)	S	489
5257	Q5LJZ2	Q5LJZ2	Histone-lysine N-methyltransferase SETD1	Set1	Lateral (2)	S	1089
5245	Q5BI31	Q5BI31			Lateral (2)	S	129
5210	Q4V3Z5	Q4V3Z5			Lateral (2)	S	118
5104	Q24574	Q24574	Ubiquitin carboxyl-terminal hydrolase 64E	Ubp64E	Lateral (2)	S	1205
5062	Q24478	Q24478	Centrosome-associated zinc finger protein CP190	Cp190	Lateral (2)	S	197
5048	Q24478	Q24478	Centrosome-associated zinc finger protein CP190	Cp190	Lateral (2)	S	938
5031	Q24371	Q24371	Protein lethal(2)denticleless	l(2)dtl	Lateral (2)	S	524
4981	Q23976	Q23976	ATP-dependent DNA helicase 2 subunit 1	Irbp	Lateral (2)	S	16
4926	Q0E8X6	Q0E8X6		eIF2B-delta	Lateral (2)	S	220
4917	X2J8G3	X2J8G3		mri	Lateral (2)	S	10
4913	Q0E8J0	Q0E8J0		MEP-1	Lateral (2)	S	915
4849	Q01637	Q01637	Uridine 5'-monophosphate synthase;Orotate phosphoribosyltransferase;Orotidine 5'-phosphate decarboxylase	r-l	Lateral (2)	S	447
4178	O16043	O16043		Df31	Lateral (2)	S	167
4607	P29327	P29327	40S ribosomal protein S6	RpS6	Lateral (2)	S	242
4604	P28668	P28668	Bifunctional glutamate/proline--tRNA ligase;Glutamate--tRNA ligase;Proline--tRNA ligase	Aats-glupro	Lateral (2)	S	176
4586	P25823	P25823	Maternal protein tudor	tud	Lateral (2)	S	1569
4573	P25028	P25028	Mitosis initiation protein fs(1)Ya	fs(1)Ya	Lateral (2)	S	511
4572	P25028	P25028	Mitosis initiation protein fs(1)Ya	fs(1)Ya	Lateral (2)	S	507
4563	Q8IMF5	Q8IMF5	205 kDa microtubule-associated protein	Map205	Lateral (2)	S	710
4560	P23128	P23128	Putative ATP-dependent RNA helicase me31b	me31B	Lateral (2)	S	450
4199	O16810	O16810	Origin recognition complex subunit 1	Orc1	Lateral (2)	S	481
4497	P15348	P15348	DNA topoisomerase 2	Top2	Lateral (2)	S	263
4455	X2JCP8;P53501	X2JCP8	Actin-5C;Actin-42A;Actin-57B;Actin-87E;Actin, indirect flight muscle	Act5C;Act42A;Act57B;Act87E;Act88F	Lateral (2)	S	61
4449	P09180	P09180	60S ribosomal protein L4	RpL4	Lateral (2)	S	2
4331	X2J516	X2J516	'Trifunctional purine biosynthetic protein adenosine-3;Phosphoribosylamine--glycine ligase;Phosphoribosylformylglycinamidine cycl...' <Preview truncated at 128 characters>	ade3	Lateral (2)	S	814
4325	O97132	O97132	Anoctamin	Axs	Lateral (2)	S	40
4320	O96838	O96838	Putative 1-phosphatidylinositol 3-phosphate 5-kinase	fab1	Lateral (2)	S	734
4301	Q2PE37	Q2PE37		pck	Lateral (2)	S	9
4502	P17210	P17210	Kinesin heavy chain	Khc	Lateral (2)	S	2
4550	Q4H2F8	Q4H2F8	Heat shock factor protein	Hsf	Lateral (2)	S	17
4186	O16043	O16043		Df31	Lateral (2)	S	99
4656	P35600	P35600	Replication factor C subunit 1	Gnf1	Lateral (2)	S	163
4662	P35600	P35600	Replication factor C subunit 1	Gnf1	Lateral (2)	S	40
4712	P42283	P42283	'Longitudinals lacking protein, isoform G;Longitudinals lacking protein, isoforms H/M/V;Longitudinals lacking protein, isoforms A...' <Preview truncated at 128 characters>	lola	Lateral (2)	S	372
4726	P45437	P45437	Coatomer subunit beta	betaCop	Lateral (2)	S	721
4780	P54397	P54397	39 kDa FK506-binding nuclear protein	FK506-bp1	Lateral (2)	S	16
4824	P91682	P91682	Protein smoothened	smo	Lateral (2)	S	693
4840	P98159	P98159	Serine protease nudel	ndl	Lateral (2)	S	220
4131	M9PJC7	M9PJC7	Homeotic protein female sterile	fs(1)h	Lateral (2)	S	2001
5258	Q5LJZ2	Q5LJZ2	Histone-lysine N-methyltransferase SETD1	Set1	Lateral (2)	S	1091
5280	Q5U0X8	Q5U0X8			Lateral (2)	S	246
5281	Q5U0X8	Q5U0X8			Lateral (2)	S	250
5342	Q7JRH5	Q7JRH5			Lateral (2)	S	519
5362	Q7JVL3	Q7JVL3		Prp38	Lateral (2)	S	194
3993	M9PGW8	M9PGW8		bif	Lateral (2)	S	509
3935	M9PG50	M9PG50	Cyclin-dependent kinase 12	Cdk12	Lateral (2)	S	353
3881	M9PFZ1;Q7KTV5	Q7KTV5		Nopp140	Lateral (2)	S	110
4254	O46067	O46067		EG:25E8.1	Lateral (2)	S	608
3849	M9PFY2	M9PFY2		CG6479-RA;CG6479-RB	Lateral (2)	S	153
3827	M9PFS0	M9PFS0	Target of rapamycin	Tor	Lateral (2)	S	2385
3816	M9PFF0	M9PFF0	60S ribosomal protein L13	RpL13	Lateral (2)	S	139
3768	M9PEJ1	M9PEJ1		mge	Lateral (2)	S	17
3690	Q0E8R8	Q0E8R8			Lateral (2)	S	383
3567	M9PE73	M9PE73	Dynein heavy chain, cytoplasmic	Dhc64C	Lateral (2)	S	11
3566	M9PE73	M9PE73	Dynein heavy chain, cytoplasmic	Dhc64C	Lateral (2)	S	4
3565	M9PE73	M9PE73	Dynein heavy chain, cytoplasmic	Dhc64C	Lateral (2)	S	930
3518	M9PB86	M9PB86	Neurogenic protein big brain	bib	Lateral (2)	S	300
3507	M9PB68	M9PB68	Protein purity of essence	poe	Lateral (2)	S	3051
3494	M9PB60	M9PB60	Anion exchange protein	Ndae1	Lateral (2)	S	333
3474	M9PAY6	M9PAY6		CG17078-RA	Lateral (2)	S	23
177	A0A0B4K623	A0A0B4K623	'C-1-tetrahydrofolate synthase, cytoplasmic;Methylenetetrahydrofolate dehydrogenase;Methenyltetrahydrofolate cyclohydrolase;Formy...' <Preview truncated at 128 characters>	pug	Lateral (2)	S	579
308	A0A0B4K6W1	A0A0B4K6W1	Protein suppressor of hairy wing	su(Hw)	Lateral (2)	S	578
377	A1Z8W9	A1Z8W9		garz	Lateral (2)	S	588
425	A0A0B4K7Y7	A0A0B4K7Y7	La-related protein 1	larp	Lateral (2)	S	1261
459	A1Z945	A1Z945			Lateral (2)	S	1233
573	Q9N693	Q9N693		sbb	Lateral (2)	S	1988
633	Q0E965	Q0E965		SRPK	Lateral (2)	S	485
675	A0A0B4KFE9	A0A0B4KFE9	Nucleoprotein TPR	Mtor	Lateral (2)	S	2148
713	A0A0B4KH36	A0A0B4KH36		Bruce	Lateral (2)	S	2801
785	A0A0B4KG81	A0A0B4KG81	Protein dopey-1 homolog	CG15099	Lateral (2)	S	1360
820	A8WHL4	A8WHL4		bon	Lateral (2)	S	862
939	A0A0B4KHJ5	A0A0B4KHJ5	Glycogen [starch] synthase	GlyS	Lateral (2)	S	640
1061	A0A0B4KI71	A0A0B4KI71		Map205	Lateral (2)	S	636
1084	A0A0B4LEV8	A0A0B4LEV8		coil	Lateral (2)	S	334
1222	A0A0B4LGB7	A0A0B4LGB7	Calcium-transporting ATPase;Calcium-transporting ATPase sarcoplasmic/endoplasmic reticulum type	Ca-P60A	Lateral (2)	S	662
1399	A0A126BEE6	A0A126BEE6	Protein NASP homolog	CG8223	Lateral (2)	S	2
1416	A0A126GUU0	A0A126GUU0	CCR4-NOT transcription complex subunit 10	Not10	Lateral (2)	S	6
1437	A1A708	A1A708	Uncharacterized protein CG4951	CG4951	Lateral (2)	S	213
1558	A1Z8R2	A1Z8R2		ADD1	Lateral (2)	S	1018
1625	A1Z9S6	A1Z9S6		Su(var)2-HP2	Lateral (2)	S	713
1677	Q8IFW6	Q8IFW6		Dek	Lateral (2)	S	395
1981	Q9VJI6	Q9VJI6			Lateral (2)	S	104
2044	M9PEM7	M9PEM7		lqf	Lateral (2)	S	469
2105	A8JV07	A8JV07			Lateral (2)	S	468
2223	B7YZZ9	B7YZZ9	Recombination repair protein 1	Rrp1	Lateral (2)	S	141
2229	B7YZZ9	B7YZZ9	Recombination repair protein 1	Rrp1	Lateral (2)	S	64
2243	B7Z002	B7Z002		kis	Lateral (2)	S	1715
2310	M9MRW2	M9MRW2		RhoGAP71E	Lateral (2)	S	356
2316	B7Z066	B7Z066	UDP-sugar transporter UST74c	frc	Lateral (2)	S	44
2425	B7Z0I8	B7Z0I8			Lateral (2)	S	1900
2542	D0Z760	D0Z760	Polycomb group protein Psc	Psc-RA;Psc	Lateral (2)	S	727
2678	M9PIA6	M9PIA6	Chromodomain-helicase-DNA-binding protein Mi-2 homolog	Mi-2	Lateral (2)	S	70
2748	E1JIS1	E1JIS1		CG7956-RA	Lateral (2)	S	780
2864	Q9VQ76	Q9VQ76		tho2	Lateral (2)	S	1264
2964	M9NDX8	M9NDX8		Spn	Lateral (2)	S	1859
3017	L0MLP2	L0MLP2	Calcium/calmodulin-dependent protein kinase type II alpha chain	CaMKII	Lateral (2)	S	315
3037	L0MPR2	L0MPR2		unc-13	Lateral (2)	S	380
3120	M9MS15	M9MS15	Neurotactin	Nrt	Lateral (2)	S	48
3252	M9ND37	M9ND37		eIF5B	Lateral (2)	S	1056
3415	M9NFQ5	M9NFQ5	Protein furry	fry	Lateral (2)	S	1853
3457	M9NG39	M9NG39	Zinc finger protein on ecdysone puffs	Pep	Lateral (2)	S	650
6138	Q8INH7	Q8INH7		timeout	Lateral (2)	S	1310
3458	M9NG39	M9NG39	Zinc finger protein on ecdysone puffs	Pep	Lateral (2)	S	657
3450	M9NFV3	M9NFV3		Plp	Lateral (2)	S	1409
3354	M9NED8	M9NED8	Breast carcinoma-amplified sequence 3 homolog	rudhira	Lateral (2)	S	370
3230	M9NCX1	M9NCX1	Lethal(2) giant larvae protein	l(2)gl	Lateral (2)	S	484
3089	M9MSI8	M9MSI8		tweek	Lateral (2)	S	4858
3019	L0MLP2	L0MLP2	Calcium/calmodulin-dependent protein kinase type II alpha chain	CaMKII	Lateral (2)	S	318
3002	M9MQH9	M9MQH9	Serine/threonine-protein phosphatase PP2A 65 kDa regulatory subunit	Pp2A-29B	Lateral (2)	S	4
2924	F3YDJ5	F3YDJ5	UPF0729 protein CG18508	CG18508-RA;CG18508	Lateral (2)	S	69
2846	E2QCK0	E2QCK0	Transport and Golgi organization protein 11	Tango11	Lateral (2)	S	182
2707	E1JIB9;X2JG79	E1JIB9			Lateral (2)	S	379
2581	E1JGV6	E1JGV6	H/ACA ribonucleoprotein complex subunit 4	Nop60B	Lateral (2)	S	428
2489	E2QD63	E2QD63	Hsc70-interacting protein 2;Hsc70-interacting protein 1	HIP-R;HIP	Lateral (2)	S	87
2348	B7Z0E2	B7Z0E2		Unr	Lateral (2)	S	630
2315	M9MRW2	M9MRW2		RhoGAP71E	Lateral (2)	S	282
2260	B7Z002	B7Z002		kis	Lateral (2)	S	1508
2240	B7Z002	B7Z002		kis	Lateral (2)	S	3747
2224	B7YZZ9	B7YZZ9	Recombination repair protein 1	Rrp1	Lateral (2)	S	142
2107	A8JV07	A8JV07			Lateral (2)	S	739
2092	Q9W4F6	Q9W4F6			Lateral (2)	S	422
2021	M9PBL6	M9PBL6		kst	Lateral (2)	S	992
1743	A1ZBE9	A1ZBE9			Lateral (2)	S	953
1661	A1ZA92	A1ZA92	Polynucleotide 5'-hydroxyl-kinase NOL9	CG8414	Lateral (2)	S	92
1562	A1Z8R2	A1Z8R2		ADD1	Lateral (2)	S	221
1438	A1A708	A1A708	Uncharacterized protein CG4951	CG4951	Lateral (2)	S	214
1436	A1A708	A1A708	Uncharacterized protein CG4951	CG4951	Lateral (2)	S	212
1406	A0A126GUQ5	A0A126GUQ5	Nuclear receptor-binding protein homolog	Madm	Lateral (2)	S	473
1393	A0A126BEE6	A0A126BEE6	Protein NASP homolog	CG8223	Lateral (2)	S	184
1150	A0A0B4LFJ4	A0A0B4LFJ4	Transmembrane protein 131 homolog	CG8370	Lateral (2)	S	1334
1083	A0A0B4LEV8	A0A0B4LEV8		coil	Lateral (2)	S	203
997	A0A0B4KHY8	A0A0B4KHY8			Lateral (2)	S	65
900	A0A0B4KHE9	A0A0B4KHE9	26S proteasome non-ATPase regulatory subunit 1	Rpn2	Lateral (2)	S	305
794	Q9N6D7	Q9N6D7		hrg	Lateral (2)	S	444
775	A0A0B4KG81	A0A0B4KG81	Protein dopey-1 homolog	CG15099	Lateral (2)	S	537
703	A0A0B4KFJ7	A0A0B4KFJ7	JmjC domain-containing histone demethylation protein 1	Kdm2	Lateral (2)	S	10
634	Q0E965	Q0E965		SRPK	Lateral (2)	S	486
587	A0A0B4KEV9	A0A0B4KEV9	Inositol-pentakisphosphate 2-kinase	Ipk1	Lateral (2)	S	9
507	A0A0B4KEE7	A0A0B4KEE7			Lateral (2)	S	1138
445	A0A0B4LF25	A0A0B4LF25		Prosap	Lateral (2)	S	879
421	A0A0B4K7Y7	A0A0B4K7Y7	La-related protein 1	larp	Lateral (2)	S	223
372	A0A0B4K7G4	A0A0B4K7G4	DNA-binding protein modulo	mod	Lateral (2)	S	42
277	A0A0B4KHY2	A0A0B4KHY2	Protein lap4	scrib	Lateral (2)	S	700
13549	X2JD55	X2JD55	Vitellogenin-1	Yp1	Lateral (2)	Y	422
13472	Q9Y095	Q9Y095		XRCC1	Lateral (2)	T	404
13389	Q9W397	Q9W397			Lateral (2)	T	288
13366	Q9W2S1	Q9W2S1		Tango5	Lateral (2)	T	510
13365	Q9W2S1	Q9W2S1		Tango5	Lateral (2)	T	509
13316	Q9VZS1	Q9VZS1			Lateral (2)	T	328
13263	X2JF83	X2JF83			Lateral (2)	T	489
13199	Q9VV74	Q9VV74	Survival motor neuron protein	Smn	Lateral (2)	T	63
13125	Q9VRV1	Q9VRV1			Lateral (2)	T	556
13115	Q9VRM6	Q9VRM6		l(3)psg2	Lateral (2)	T	1280
13042	Q9VNE0	Q9VNE0			Lateral (2)	T	1621
12958	Q9VKJ1	Q9VKJ1	MPN domain-containing protein CG4751	CG4751	Lateral (2)	T	1297
12956	Q9VK85	Q9VK85		Elf	Lateral (2)	T	175
12892	Q9VHI8	Q9VHI8			Lateral (2)	T	5
12878	Q9VHC0	Q9VHC0		RnpS1	Lateral (2)	T	198
12871	Q9VGI5	Q9VGI5		Lk6	Lateral (2)	T	232
12869	Q9VGA4	Q9VGA4		MBD-R2	Lateral (2)	T	161
12828	Q9VDG2	Q9VDG2	RalA-binding protein 1	Rlip	Lateral (2)	T	76
12789	Q9VC54	Q9VC54			Lateral (2)	T	847
12755	Q9VAU6	Q9VAU6			Lateral (2)	T	380
12754	Q9VAN6	Q9VAN6	Histone RNA hairpin-binding protein	Slbp	Lateral (2)	T	13
12715	Q9V4P1	Q9V4P1	Actin-binding protein anillin	scra	Lateral (2)	T	784
12708	Q9V471	Q9V471		ZnT35C	Lateral (2)	T	7
12689	X2JF59	X2JF59	Peroxiredoxin 1	Jafrac1	Lateral (2)	T	193
12593	Q8SX89	Q8SX89		kuk	Lateral (2)	T	236
12391	Q7K180	Q7K180		Map60	Lateral (2)	T	142
12378	Q7JVY2	Q7JVY2		dup	Lateral (2)	T	158
12319	Q27333	Q27333	Lethal(2)neighbour of tid protein	l(2)not	Lateral (2)	T	20
12305	Q24478	Q24478	Centrosome-associated zinc finger protein CP190	Cp190	Lateral (2)	T	936
12300	Q24371	Q24371	Protein lethal(2)denticleless	l(2)dtl	Lateral (2)	T	456
12275	Q0KHZ9	Q0KHZ9		Cnx99A;Cnx14D	Lateral (2)	T	557
12228	P52304	P52304	Serine/threonine-protein kinase polo	polo	Lateral (2)	T	182
12203	P35600	P35600	Replication factor C subunit 1	Gnf1	Lateral (2)	T	60
12190	P28668	P28668	Bifunctional glutamate/proline--tRNA ligase;Glutamate--tRNA ligase;Proline--tRNA ligase	Aats-glupro	Lateral (2)	T	180
12099	O16043	O16043		Df31	Lateral (2)	T	126
12050	M9PG50	M9PG50	Cyclin-dependent kinase 12	Cdk12	Lateral (2)	T	365
12041	M9PFZ1;Q7KTV5	Q7KTV5		Nopp140	Lateral (2)	T	408
12016	M9PDG3	M9PDG3	Protein shuttle craft	stc	Lateral (2)	T	324
11963	M9NG39	M9NG39	Zinc finger protein on ecdysone puffs	Pep	Lateral (2)	T	638
11694	A8JV07	A8JV07			Lateral (2)	T	487
11679	M9PBL6	M9PBL6		kst	Lateral (2)	T	990
11647	A4V2K7	A4V2K7	Chromosomal protein D1	D1	Lateral (2)	T	115
11581	A1Z6I7	A1Z6I7		BubR1	Lateral (2)	T	1084
11580	A1Z6I7	A1Z6I7		BubR1	Lateral (2)	T	1081
11566	A0A126BEE6	A0A126BEE6	Protein NASP homolog	CG8223	Lateral (2)	T	174
11507	A0A0B4KI71;Q8IMF5	Q8IMF5	205 kDa microtubule-associated protein	Map205	Lateral (2)	T	1012
11411	Q0E965	Q0E965		SRPK	Lateral (2)	T	89
11401	Q95RL2	Q95RL2		row	Lateral (2)	T	91
10911	Q9XTP7	Q9XTP7		jumu	Lateral (2)	S	166
10854	Q9W541	Q9W541		eIF2B-epsilon	Lateral (2)	S	422
10843	Q9W526	Q9W526		EG:67A9.2	Lateral (2)	S	452
10792	Q9W4K1	Q9W4K1	AP-3 complex subunit beta	rb	Lateral (2)	S	796
10734	Q9W425	Q9W425		Rbcn-3A	Lateral (2)	S	1796
10652	X2JE07	X2JE07		CG1677-RA	Lateral (2)	S	805
10572	Q9W397	Q9W397			Lateral (2)	S	289
10492	Q9W2U7	Q9W2U7		nocte	Lateral (2)	S	1003
10488	Q9W2U7	Q9W2U7		nocte	Lateral (2)	S	981
10469	Q9W2S1	Q9W2S1		Tango5	Lateral (2)	S	504
10457	Q9W2N6	Q9W2N6			Lateral (2)	S	875
10455	Q9W2N6	Q9W2N6			Lateral (2)	S	868
10336	Q9W1G7	Q9W1G7		Nap1	Lateral (2)	S	119
10335	Q9W1G7	Q9W1G7		Nap1	Lateral (2)	S	118
10240	Q9W0A8	Q9W0A8		RpL23A	Lateral (2)	S	178
10124	X2JEU3	X2JEU3		CG1737-RA	Lateral (2)	S	142
10116	X2JEU3	X2JEU3		CG1737-RA	Lateral (2)	S	736
10058	Q9VYT4	Q9VYT4		ATP7	Lateral (2)	S	1179
10022	Q9VYE9	Q9VYE9		CG1622-RA	Lateral (2)	S	381
10017	Q9VYE3	Q9VYE3		CG15747-RA	Lateral (2)	S	330
9827	Q9VWV2	Q9VWV2		CG32549-RF	Lateral (2)	S	2
9784	X2JL49	X2JL49	Protein FAM188A homolog	CG7332	Lateral (2)	S	74
9783	X2JL49	X2JL49	Protein FAM188A homolog	CG7332	Lateral (2)	S	229
9782	X2JL49	X2JL49	Protein FAM188A homolog	CG7332	Lateral (2)	S	228
9770	X2JFQ1	X2JFQ1			Lateral (2)	S	208
9684	Q9VW54	Q9VW54		Rpn1	Lateral (2)	S	44
9568	Q9VV74	Q9VV74	Survival motor neuron protein	Smn	Lateral (2)	S	2
9470	Q9VUC4	Q9VUC4		CG13484-RA	Lateral (2)	S	64
9432	Q9VU84	Q9VU84	Drebrin-like protein	Abp1	Lateral (2)	S	237
9397	Q9VU43	Q9VU43		SRm160	Lateral (2)	S	257
9380	Q9VU43	Q9VU43		SRm160	Lateral (2)	S	810
9379	Q9VU43	Q9VU43		SRm160	Lateral (2)	S	805
9378	Q9VU43	Q9VU43		SRm160	Lateral (2)	S	804
9372	Q9VU43	Q9VU43		SRm160	Lateral (2)	S	832
9329	Q9VTS3	Q9VTS3		Grip163	Lateral (2)	S	465
9294	Q9VTE2	Q9VTE2	Protein suppressor of underreplication	SuUR	Lateral (2)	S	838
9203	Q9VSF2	Q9VSF2	Mediator of RNA polymerase II transcription subunit 24	MED24	Lateral (2)	S	827
9139	Q9VRP5	Q9VRP5	Ubiquitin carboxyl-terminal hydrolase 36	scny	Lateral (2)	S	819
9116	Q9VRM3	Q9VRM3		sinu	Lateral (2)	S	12
9109	Q9VRG8	Q9VRG8			Lateral (2)	S	67
8971	Q9VPX7	Q9VPX7	Adenylyl cyclase-associated protein	capt	Lateral (2)	S	248
8970	Q9VPX7	Q9VPX7	Adenylyl cyclase-associated protein	capt	Lateral (2)	S	394
8948	Q9VPM5	Q9VPM5		mbm	Lateral (2)	S	240
8927	Q9VPL5	Q9VPL5		Tbc1d15-17	Lateral (2)	S	679
8814	Q9VNH5	Q9VNH5			Lateral (2)	S	2
8802	Q9VNE9	Q9VNE9	60S ribosomal protein L13a	RpL13A	Lateral (2)	S	79
8762	Q9VNE0	Q9VNE0			Lateral (2)	S	1501
8689	Q9VMQ8	Q9VMQ8		CG7371-RA	Lateral (2)	S	6
8583	Q9VLV5	Q9VLV5	Probable small nuclear ribonucleoprotein E	SmE	Lateral (2)	S	90
8537	Q9VL71	Q9VL71		Srp54	Lateral (2)	S	479
8531	Q9VL71	Q9VL71		Srp54	Lateral (2)	S	436
8530	Q9VL71	Q9VL71		Srp54	Lateral (2)	S	434
8487	Q9VKU7	Q9VKU7	Gamma-tubulin complex component 4 homolog	Grip75	Lateral (2)	S	210
8483	Q9VKU2	Q9VKU2			Lateral (2)	S	58
8480	Q9VKU2	Q9VKU2			Lateral (2)	S	176
8479	Q9VKU2	Q9VKU2			Lateral (2)	S	175
8453	Q9VKJ1	Q9VKJ1	MPN domain-containing protein CG4751	CG4751	Lateral (2)	S	1290
8452	Q9VKJ1	Q9VKJ1	MPN domain-containing protein CG4751	CG4751	Lateral (2)	S	1288
8439	Q9VKF0	Q9VKF0		CycY	Lateral (2)	S	12
8435	Q9VKD2	Q9VKD2			Lateral (2)	S	239
8426	Q9VKC1	Q9VKC1		RpL7-like	Lateral (2)	S	31
8425	Q9VKB9	Q9VKB9	Rab3 GTPase-activating protein regulatory subunit	rab3-GAP	Lateral (2)	S	926
8400	Q9VK39	Q9VK39		CG9928-RA	Lateral (2)	S	46
8367	Q9VJQ4	Q9VJQ4	mRNA cap guanine-N7 methyltransferase	l(2)35Bd	Lateral (2)	S	48
8365	Q9VJQ4	Q9VJQ4	mRNA cap guanine-N7 methyltransferase	l(2)35Bd	Lateral (2)	S	29
8364	Q9VJQ4	Q9VJQ4	mRNA cap guanine-N7 methyltransferase	l(2)35Bd	Lateral (2)	S	24
8361	Q9VJK9	Q9VJK9		BG:DS09218.3	Lateral (2)	S	109
8325	Q9VJ87	Q9VJ87	Pre-mRNA-splicing factor CWC22 homolog	ncm	Lateral (2)	S	1111
8323	Q9VJ87	Q9VJ87	Pre-mRNA-splicing factor CWC22 homolog	ncm	Lateral (2)	S	146
8314	Q9VJ57	Q9VJ57		Grip71	Lateral (2)	S	335
8295	Q9VJ14	Q9VJ14		mib2	Lateral (2)	S	877
8250	Q9VIP2	Q9VIP2			Lateral (2)	S	199
8220	Q9VIH1	Q9VIH1		RPA2	Lateral (2)	S	167
8214	Q9VIF1	Q9VIF1	Exonuclease mut-7 homolog	Nbr	Lateral (2)	S	17
8213	Q9VIF1	Q9VIF1	Exonuclease mut-7 homolog	Nbr	Lateral (2)	S	386
8195	Q9VID9	Q9VID9			Lateral (2)	S	1043
8181	Q9VID9	Q9VID9			Lateral (2)	S	1911
8124	Q9VHN7	Q9VHN7			Lateral (2)	S	309
8063	Q9VHC0	Q9VHC0		RnpS1	Lateral (2)	S	137
8057	Q9VHC0	Q9VHC0		RnpS1	Lateral (2)	S	194
8056	Q9VHC0	Q9VHC0		RnpS1	Lateral (2)	S	6
8003	Q9VGJ8	Q9VGJ8			Lateral (2)	S	11
7926	Q9VFT4	Q9VFT4		rin	Lateral (2)	S	538
7862	Q9VEP6	Q9VEP6	Adenylosuccinate lyase	AdSL	Lateral (2)	S	10
7825	Q9VE98	Q9VE98			Lateral (2)	S	321
7683	Q9VCQ7	Q9VCQ7		Rassf	Lateral (2)	S	318
7631	Q9VCF1	Q9VCF1			Lateral (2)	S	227
7628	Q9VCF1	Q9VCF1			Lateral (2)	S	217
7625	Q9VCD3	Q9VCD3			Lateral (2)	S	4
7521	Q9VC58	Q9VC58		Syx18	Lateral (2)	S	260
7518	Q9VC54	Q9VC54			Lateral (2)	S	849
7500	Q9VC45	Q9VC45	Protein abnormal spindle	asp	Lateral (2)	S	398
7476	Q9VC08	Q9VC08		Mink	Lateral (2)	S	440
7443	Q9VBU7	Q9VBU7		Nup358	Lateral (2)	S	2239
7434	Q9VBU7	Q9VBU7		Nup358	Lateral (2)	S	2156
7417	Q9VBU7	Q9VBU7		Nup358	Lateral (2)	S	2695
7416	Q9VBU7	Q9VBU7		Nup358	Lateral (2)	S	2694
7404	Q9VBP5	Q9VBP5		jigr1	Lateral (2)	S	329
7344	Q9VAY8	Q9VAY8		CG12260	Lateral (2)	S	77
7339	Q9VAW1	Q9VAW1		Moca-cyp	Lateral (2)	S	831
7338	Q9VAW1	Q9VAW1		Moca-cyp	Lateral (2)	S	829
7322	Q9VAW1	Q9VAW1		Moca-cyp	Lateral (2)	S	743
7315	Q9VAW1	Q9VAW1		Moca-cyp	Lateral (2)	S	690
7314	Q9VAW1	Q9VAW1		Moca-cyp	Lateral (2)	S	682
7223	Q9V9U3	Q9V9U3			Lateral (2)	S	19
7221	Q9V9U3	Q9V9U3			Lateral (2)	S	170
7212	Q9V9T4	Q9V9T4		Acf1	Lateral (2)	S	239
7159	Q9V4P1	Q9V4P1	Actin-binding protein anillin	scra	Lateral (2)	S	716
7103	Q9V468	Q9V468	Zinc finger matrin-type protein CG9776	CG9776	Lateral (2)	S	335
6926	Q9V3C0	Q9V3C0	ATP-dependent RNA helicase abstrakt	abs	Lateral (2)	S	57
6925	Q9V3C0	Q9V3C0	ATP-dependent RNA helicase abstrakt	abs	Lateral (2)	S	56
6910	Q9U5L1	Q9U5L1	Signal recognition particle receptor subunit alpha homolog	Gtp-bp	Lateral (2)	S	279
6761	Q9VKD8	Q9VKD8			Lateral (2)	S	260
6748	Q95SH7	Q95SH7			Lateral (2)	S	300
6710	Q94546	Q94546	Another transcription unit protein	Atu	Lateral (2)	S	202
6654	Q94527	Q94527	Nuclear factor NF-kappa-B p110 subunit;Nuclear factor NF-kappa-B p68 subunit;Nuclear factor NF-kappa-B p49 subunit	Rel	Lateral (2)	S	45
6653	Q94527	Q94527	Nuclear factor NF-kappa-B p110 subunit;Nuclear factor NF-kappa-B p68 subunit;Nuclear factor NF-kappa-B p49 subunit	Rel	Lateral (2)	S	41
6651	X2JD82	X2JD82	Open rectifier potassium channel protein 1	Ork1	Lateral (2)	S	373
6625	Q8T6B9	Q8T6B9	Poly(U)-binding-splicing factor half pint	pUf68	Lateral (2)	S	30
6618	Q8T626	Q8T626	Protein disks lost	dlt	Lateral (2)	S	353
6613	Q8T4A9	Q8T4A9		Rrp45	Lateral (2)	S	331
6560	Q8SXM8	Q8SXM8	Lysine--tRNA ligase	Aats-lys	Lateral (2)	S	71
6547	Q8SX89	Q8SX89		kuk	Lateral (2)	S	249
6410	Q8MLV1	Q8MLV1	Lamin-B receptor	LBR	Lateral (2)	S	225
6409	Q8MLV1	Q8MLV1	Lamin-B receptor	LBR	Lateral (2)	S	223
6389	Q8IRH5	Q8IRH5	Zinc finger protein CG2199	CG2199	Lateral (2)	S	600
6379	Q8IRD2	Q8IRD2		YT521-B	Lateral (2)	S	132
6308	Q9VWB8	Q9VWB8		Nup205	Lateral (2)	S	2002
6235	Q9V475	Q9V475		Cul3	Lateral (2)	S	762
6151	Q8INM3	Q8INM3	Protein slender lobes;Slender lobes-like protein	sle;CG12592	Lateral (2)	S	946
32	E5DK16	E5DK16		Lpin;CG8709-RH	Lateral (2)	S	156
53	A0A0B4KG78;Q7K1Q6	Q7K1Q6		Jabba	Ventral Tl10B (3)	S	155
13103	Q9VR17	Q9VR17		Bsg25A	Ventral Tl10B (3)	T	231
13077	Q9VPR5	Q9VPR5			Ventral Tl10B (3)	T	322
3421	M9NFQ5	M9NFQ5	Protein furry	fry	Ventral Tl10B (3)	S	2337
3740	M9PDR2	M9PDR2		hipk	Ventral Tl10B (3)	S	919
3829	M9PFS8	M9PFS8	Cold shock domain-containing protein CG9705	CG9705	Ventral Tl10B (3)	S	139
7403	Q9VBP5	Q9VBP5		jigr1	Ventral Tl10B (3)	S	328
9796	Q9VWP5	Q9VWP5			Ventral Tl10B (3)	S	156
9816	X2JFP6	X2JFP6		Rip11	Ventral Tl10B (3)	S	635
12727	Q9V9T4	Q9V9T4		Acf1	Ventral Tl10B (3)	T	1157
109	Q961V3	Q961V3		CG2246-RB;CG2246-RA	Ventral Tl10B (3)	S	236
13405	X2JE07	X2JE07		CG1677-RA	Ventral Tl10B (3)	T	573
13381	Q9W335	Q9W335		l(1)G0320	Ventral Tl10B (3)	T	272
310	A0A0B4K6W1	A0A0B4K6W1	Protein suppressor of hairy wing	su(Hw)	Ventral Tl10B (3)	S	724
336	A0A0B4KHR8	A0A0B4KHR8	Ankyrin repeat and KH domain-containing protein mask	mask	Ventral Tl10B (3)	S	74
346	Q5U0Y0;A0A0B4LF82;A1Z928	Q5U0Y0		Sin3A	Ventral Tl10B (3)	S	909
384	A0A0B4K7S0	A0A0B4K7S0	Ubiquitin carboxyl-terminal hydrolase;Probable ubiquitin carboxyl-terminal hydrolase FAF	faf	Ventral Tl10B (3)	S	1021
572	Q9N693	Q9N693		sbb	Ventral Tl10B (3)	S	2110
766	Q9VNF7	Q9VNF7		MTA1-like	Ventral Tl10B (3)	S	681
899	A0A0B4KHE9	A0A0B4KHE9	26S proteasome non-ATPase regulatory subunit 1	Rpn2	Ventral Tl10B (3)	S	298
989	A0A0B4KHY6	A0A0B4KHY6	DNA-binding protein Ets97D	Ets97D	Ventral Tl10B (3)	S	153
998	A0A0B4KHY8	A0A0B4KHY8			Ventral Tl10B (3)	S	917
1009	A0A0B4KHZ0	A0A0B4KHZ0		woc	Ventral Tl10B (3)	S	1080
1158	A0A0B4LFL2	A0A0B4LFL2	Eukaryotic translation initiation factor 3 subunit C	eIF3-S8	Ventral Tl10B (3)	S	165
1204	Q8MLW2	Q8MLW2	Helicase domino	dom	Ventral Tl10B (3)	S	2216
1227	A0A0B4LGF9	A0A0B4LGF9	Protein dead ringer	retn	Ventral Tl10B (3)	S	857
1249	A0A0B4LGH1;Q24560	Q24560	Tubulin beta-3 chain;Tubulin beta-1 chain	betaTub60D;betaTub56D;betaTub97EF	Ventral Tl10B (3)	S	339
1353	A0A0C4DHD4	A0A0C4DHD4	Transcriptional coactivator yorkie	yki	Ventral Tl10B (3)	S	26
1427	A0T1Z5	A0T1Z5		yrt	Ventral Tl10B (3)	S	581
1429	A0T1Z5	A0T1Z5		yrt	Ventral Tl10B (3)	S	573
1486	A1Z6I7	A1Z6I7		BubR1	Ventral Tl10B (3)	S	1088
1503	A1Z713	A1Z713		Vps13	Ventral Tl10B (3)	S	1792
1543	A1Z898	A1Z898		Caf1-105	Ventral Tl10B (3)	S	585
1642	A1Z9S6	A1Z9S6		Su(var)2-HP2	Ventral Tl10B (3)	S	864
1665	Q8IFW6	Q8IFW6		Dek	Ventral Tl10B (3)	S	81
1798	A1ZBW7	A1ZBW7	WASH complex subunit FAM21 homolog	CG16742	Ventral Tl10B (3)	S	1048
1883	A4V2K7	A4V2K7	Chromosomal protein D1	D1	Ventral Tl10B (3)	S	107
1897	A4V3G8	A4V3G8	Nucleosomal histone kinase 1	ball	Ventral Tl10B (3)	S	381
1898	A4V3G8	A4V3G8	Nucleosomal histone kinase 1	ball	Ventral Tl10B (3)	S	382
1905	A4V3G8	A4V3G8	Nucleosomal histone kinase 1	ball	Ventral Tl10B (3)	S	428
2108	A8JV07	A8JV07			Ventral Tl10B (3)	S	720
2173	B5RJS0	B5RJS0		CG4040-RA	Ventral Tl10B (3)	S	162
2251	B7Z002	B7Z002		kis	Ventral Tl10B (3)	S	3683
2258	B7Z002	B7Z002		kis	Ventral Tl10B (3)	S	3801
2484	Q9I7R0	Q9I7R0		CG18815-RA	Ventral Tl10B (3)	S	200
2515	C7LAG1;Q59E36	Q59E36	REST corepressor	CoRest	Ventral Tl10B (3)	S	523
2676	M9PIA6	M9PIA6	Chromodomain-helicase-DNA-binding protein Mi-2 homolog	Mi-2	Ventral Tl10B (3)	S	1685
2695	Q8MRH9	Q8MRH9		CG2162-RB	Ventral Tl10B (3)	S	127
2797	E1JJN9	E1JJN9	Histone-lysine N-methyltransferase;Probable histone-lysine N-methyltransferase CG1716	Set2	Ventral Tl10B (3)	S	2131
2803	E1JJN9	E1JJN9	Histone-lysine N-methyltransferase;Probable histone-lysine N-methyltransferase CG1716	Set2	Ventral Tl10B (3)	S	850
2837	E2QC61	E2QC61	Probable RNA methyltransferase bin3	bin3	Ventral Tl10B (3)	S	51
2986	M9NDX8	M9NDX8		Spn	Ventral Tl10B (3)	S	119
3007	H9XVM7	H9XVM7	Adapter molecule Crk	Crk	Ventral Tl10B (3)	S	79
3041	L0MPS3	L0MPS3	Apolipophorins;Apolipophorin-2;Apolipophorin-1	Rfabg	Ventral Tl10B (3)	S	713
3071	X2JDP6	X2JDP6	Putative oxidoreductase GLYR1 homolog	CG4747	Ventral Tl10B (3)	S	10
3232	M9PDV1	M9PDV1	Protein diaphanous	dia	Ventral Tl10B (3)	S	109
3305	M9NDR2	M9NDR2	Protein bicaudal D	BicD	Ventral Tl10B (3)	S	305
3342	M9NEA7	M9NEA7	Defective chorion-1 protein, FC125 isoform	2001-12-01	Ventral Tl10B (3)	S	1139
3435	M9NFQ5	M9NFQ5		fry	Ventral Tl10B (3)	S	2895
3453	M9NFV3	M9NFV3		Plp	Ventral Tl10B (3)	S	2322
3686	M9PD27	M9PD27	Eukaryotic peptide chain release factor subunit 1	eRF1	Ventral Tl10B (3)	S	341
3709	M9PIH3	M9PIH3		Wnk	Ventral Tl10B (3)	S	1523
3738	M9PDR2	M9PDR2		hipk	Ventral Tl10B (3)	S	684
3777	Q7KUD6	Q7KUD6	Anion exchange protein		Ventral Tl10B (3)	S	389
3778	Q7KUD6	Q7KUD6	Anion exchange protein		Ventral Tl10B (3)	S	390
3861	M9PFZ1;Q7KTV5	Q7KTV5		Nopp140	Ventral Tl10B (3)	S	356
3880	M9PFZ1;Q7KTV5	Q7KTV5		Nopp140	Ventral Tl10B (3)	S	108
3920	M9PG22	M9PG22	ADP-ribosylation factor 1	Arf79F	Ventral Tl10B (3)	S	62
3936	M9PG50	M9PG50	Cyclin-dependent kinase 12	Cdk12	Ventral Tl10B (3)	S	364
4095	Q9VVW6	Q9VVW6		MESR6	Ventral Tl10B (3)	S	23
4115	Q9VPB2	Q9VPB2		Spc105R	Ventral Tl10B (3)	S	491
4145	M9W963	M9W963	Protein suppressor of sable	su(s)	Ventral Tl10B (3)	S	311
4306	O76906	O76906	Protein cramped	crm	Ventral Tl10B (3)	S	420
4349	X2JD55	X2JD55	Vitellogenin-1	Yp1	Ventral Tl10B (3)	S	185
4365	X2JD55	X2JD55	Vitellogenin-1	Yp1	Ventral Tl10B (3)	S	285
4469	P13060	P13060	Elongation factor 2	EF2	Ventral Tl10B (3)	S	654
4600	P28668	P28668	Bifunctional glutamate/proline--tRNA ligase;Glutamate--tRNA ligase;Proline--tRNA ligase	Aats-glupro	Ventral Tl10B (3)	S	1110
4636	P34739	P34739	Transcription termination factor 2	lds	Ventral Tl10B (3)	S	110
4806	P81900	P81900	cAMP-dependent protein kinase type II regulatory subunit	Pka-R2	Ventral Tl10B (3)	S	84
4865	Q04652	Q04652	Ring canal kelch protein;Kelch short protein	kel	Ventral Tl10B (3)	S	111
4903	Q0E8J0	Q0E8J0		MEP-1	Ventral Tl10B (3)	S	197
5010	Q24276	Q24276	Hsp90 co-chaperone Cdc37	Cdc37	Ventral Tl10B (3)	S	355
5076	Q24574	Q24574	Ubiquitin carboxyl-terminal hydrolase 64E	Ubp64E	Ventral Tl10B (3)	S	126
5089	Q24574	Q24574	Ubiquitin carboxyl-terminal hydrolase 64E	Ubp64E	Ventral Tl10B (3)	S	147
5233	Q59E33	Q59E33		scaf6	Ventral Tl10B (3)	S	744
5406	Q7JXU4	Q7JXU4		Ns2	Ventral Tl10B (3)	S	622
5410	Q7JYV7	Q7JYV7	Adenylate kinase isoenzyme 6 homolog	Ak6	Ventral Tl10B (3)	S	2
5529	Q7K3D4	Q7K3D4			Ventral Tl10B (3)	S	8
5589	Q7K4W1	Q7K4W1	Threonylcarbamoyladenosine tRNA methylthiotransferase	CG6550	Ventral Tl10B (3)	S	51
5631	Q7KM15	Q7KM15	Transcription factor BTF3	bic	Ventral Tl10B (3)	S	124
5729	Q7KRW8	Q7KRW8	Pre-mRNA-processing factor 39	CG1646	Ventral Tl10B (3)	S	610
5836	Q7KU82	Q7KU82		smid	Ventral Tl10B (3)	S	536
5963	Q7YZ99	Q7YZ99			Ventral Tl10B (3)	S	654
5994	Q7YZA2	Q7YZA2	Uncharacterized protein CG7065	CG7065	Ventral Tl10B (3)	S	573
6025	Q9VLL3	Q9VLL3		Akap200	Ventral Tl10B (3)	S	468
6072	Q8I0A1;Q8SXT8;Q9VDD2	Q9VDD2		SNF4Agamma	Ventral Tl10B (3)	S	1297
6252	Q8IPG9	Q8IPG9		Bsg	Ventral Tl10B (3)	S	258
6383	Q8IRG6	Q8IRG6	FACT complex subunit spt16	dre4	Ventral Tl10B (3)	S	437
6469	Q8MSC4	Q8MSC4		BigH1	Ventral Tl10B (3)	S	265
6615	Q8T4A9	Q8T4A9		Rrp45	Ventral Tl10B (3)	S	402
6616	Q8T4A9	Q8T4A9		Rrp45	Ventral Tl10B (3)	S	404
6628	Q8T8T9	Q8T8T9			Ventral Tl10B (3)	S	5
6633	Q8T9H0	Q8T9H0		CG9328-RA	Ventral Tl10B (3)	S	80
6943	Q9V3E9	Q9V3E9		spag	Ventral Tl10B (3)	S	69
7131	Q9V474	Q9V474		dbr	Ventral Tl10B (3)	S	716
7185	Q9V6K1	Q9V6K1	Tripeptidyl-peptidase 2	TppII	Ventral Tl10B (3)	S	1179
7239	Q9VA00	Q9VA00	Protein zwilch	zwilch	Ventral Tl10B (3)	S	83
7242	Q9VA18	Q9VA18		l(3)03670	Ventral Tl10B (3)	S	75
7279	Q9VAM5	Q9VAM5		Brd8	Ventral Tl10B (3)	S	444
7450	Q9VBX1	Q9VBX1	Nuclear export mediator factor NEMF homolog	Clbn	Ventral Tl10B (3)	S	695
7454	Q9VBX4	Q9VBX4		CG31510-RA	Ventral Tl10B (3)	S	207
7502	Q9VC45	Q9VC45	Protein abnormal spindle	asp	Ventral Tl10B (3)	S	514
7531	Q9VC60	Q9VC60			Ventral Tl10B (3)	S	220
7549	Q9VC60	Q9VC60			Ventral Tl10B (3)	S	283
7550	Q9VC60	Q9VC60			Ventral Tl10B (3)	S	286
7566	Q9VC63	Q9VC63		CG5789-RA	Ventral Tl10B (3)	S	732
7638	Q9VCH1	Q9VCH1		eIF4G2	Ventral Tl10B (3)	S	1080
7839	Q9VEJ1	Q9VEJ1		SF1	Ventral Tl10B (3)	S	343
7863	Q9VEP9	Q9VEP9			Ventral Tl10B (3)	S	371
7864	Q9VEP9	Q9VEP9			Ventral Tl10B (3)	S	372
7969	Q9VGA4	Q9VGA4		MBD-R2	Ventral Tl10B (3)	S	792
7994	Q9VGI8	Q9VGI8	Bloom syndrome protein homolog	Blm	Ventral Tl10B (3)	S	153
8005	Q9VGL0	Q9VGL0			Ventral Tl10B (3)	S	392
8132	Q9VHR5	Q9VHR5			Ventral Tl10B (3)	S	472
8286	Q9VJ12	Q9VJ12		Acn	Ventral Tl10B (3)	S	197
8322	Q9VJ87	Q9VJ87	Pre-mRNA-splicing factor CWC22 homolog	ncm	Ventral Tl10B (3)	S	221
8497	Q9VKV5	Q9VKV5	CD2 antigen cytoplasmic tail-binding protein 2 homolog	holn1	Ventral Tl10B (3)	S	17
8512	Q9VL18	Q9VL18	Probable elongation factor 1-delta	eEF1delta	Ventral Tl10B (3)	S	139
8523	Q9VL69	Q9VL69		BEST:CK01296	Ventral Tl10B (3)	S	11
8524	Q9VL71	Q9VL71		Srp54	Ventral Tl10B (3)	S	467
8606	Q9VM69	Q9VM69		nop5	Ventral Tl10B (3)	S	408
8636	Q9VME5	Q9VME5		slam	Ventral Tl10B (3)	S	327
8637	Q9VME5	Q9VME5		slam	Ventral Tl10B (3)	S	335
8650	Q9VME5	Q9VME5		slam	Ventral Tl10B (3)	S	583
8658	Q9VME5	Q9VME5		slam	Ventral Tl10B (3)	S	741
8835	Q9VNI5	Q9VNI5			Ventral Tl10B (3)	S	646
8860	Q9VP05	Q9VP05	Mediator of RNA polymerase II transcription subunit 1	MED1	Ventral Tl10B (3)	S	870
8865	Q9VP05	Q9VP05	Mediator of RNA polymerase II transcription subunit 1	MED1	Ventral Tl10B (3)	S	862
8958	Q9VPR5	Q9VPR5			Ventral Tl10B (3)	S	324
9036	Q9VQK5	Q9VQK5			Ventral Tl10B (3)	S	685
9041	Q9VQK5	Q9VQK5			Ventral Tl10B (3)	S	660
9132	Q9VRP5	Q9VRP5	Ubiquitin carboxyl-terminal hydrolase 36	scny	Ventral Tl10B (3)	S	779
9257	Q9VT61	Q9VT61			Ventral Tl10B (3)	S	843
9287	Q9VTC1	Q9VTC1			Ventral Tl10B (3)	S	128
9309	Q9VTG0	Q9VTG0		NaPi-III	Ventral Tl10B (3)	S	270
9563	Q9VV60	Q9VV60	Tyrosine--tRNA ligase	Aats-tyr	Ventral Tl10B (3)	S	236
9569	Q9VV74	Q9VV74	Survival motor neuron protein	Smn	Ventral Tl10B (3)	S	13
9626	Q9VVG9	Q9VVG9			Ventral Tl10B (3)	S	232
9794	Q9VWP5	Q9VWP5			Ventral Tl10B (3)	S	1121
9867	X2JKQ8	X2JKQ8	Rho-associated protein kinase	Rok	Ventral Tl10B (3)	S	1019
10006	X2JEW2	X2JEW2	RRP12-like protein	CG2691	Ventral Tl10B (3)	S	1095
10039	X2JEX7	X2JEX7	Ubiquitin carboxyl-terminal hydrolase;Ubiquitin carboxyl-terminal hydrolase 7	Usp7	Ventral Tl10B (3)	S	1112
10136	Q9VZ08	Q9VZ08	Receptor-mediated endocytosis protein 6 homolog	CG1657	Ventral Tl10B (3)	S	834
10203	Q9VZY0	Q9VZY0		Non2	Ventral Tl10B (3)	S	137
10280	Q9W0X8	Q9W0X8		BcDNA:GH03108	Ventral Tl10B (3)	S	431
10287	Q9W108	Q9W108		Eap	Ventral Tl10B (3)	S	7
10301	Q9W148	Q9W148		uri	Ventral Tl10B (3)	S	241
10302	Q9W148	Q9W148		uri	Ventral Tl10B (3)	S	242
10321	Q9W1A8	Q9W1A8			Ventral Tl10B (3)	S	175
10343	Q9W1H4	Q9W1H4	DNA ligase 1	DNA-ligI	Ventral Tl10B (3)	S	18
10423	Q9W244	Q9W244		px	Ventral Tl10B (3)	S	1864
10424	Q9W244	Q9W244		px	Ventral Tl10B (3)	S	1865
10430	Q9W281	Q9W281			Ventral Tl10B (3)	S	562
10486	Q9W2U7	Q9W2U7		nocte	Ventral Tl10B (3)	S	979
10509	Q9W2U7	Q9W2U7		nocte	Ventral Tl10B (3)	S	1036
10531	Q9W335	Q9W335		l(1)G0320	Ventral Tl10B (3)	S	281
10871	Q9W579	Q9W579		inc	Ventral Tl10B (3)	S	11
10880	Q9W5E2	Q9W5E2		EG:115C2.8	Ventral Tl10B (3)	S	141
10898	Q9W5R5	Q9W5R5		Slmap	Ventral Tl10B (3)	S	623
10981	Q9XZ21	Q9XZ21		snama	Ventral Tl10B (3)	S	1089
11020	Q9XZ34	Q9XZ34		Rif1	Ventral Tl10B (3)	S	1255
11030	Q9Y095	Q9Y095		XRCC1	Ventral Tl10B (3)	S	532
11112	Q9Y162	Q9Y162		Vps4	Ventral Tl10B (3)	S	101
11294	A0A0B4JCV4	A0A0B4JCV4		tacc	Ventral Tl10B (3)	T	618
11332	A0A0B4K6G6	A0A0B4K6G6			Ventral Tl10B (3)	T	1473
11402	Q9N693	Q9N693		sbb	Ventral Tl10B (3)	T	2112
11404	Q9N693	Q9N693		sbb	Ventral Tl10B (3)	T	627
11611	A1Z9S6	A1Z9S6		Su(var)2-HP2	Ventral Tl10B (3)	T	868
11641	Q9W061	Q9W061		mu2	Ventral Tl10B (3)	T	1006
11726	B7Z002	B7Z002		kis	Ventral Tl10B (3)	T	1706
11730	B7Z002	B7Z002		kis	Ventral Tl10B (3)	T	3686
11956	M9NFQ5	M9NFQ5		fry	Ventral Tl10B (3)	T	3429
11993	M9PBL3	M9PBL3	Heat shock protein 83	Hsp83	Ventral Tl10B (3)	T	278
12097	O16043	O16043		Df31	Ventral Tl10B (3)	T	43
12142	X2JD55	X2JD55	Vitellogenin-1	Yp1	Ventral Tl10B (3)	T	184
12180	P23572	P23572	Cyclin-dependent kinase 1	cdc2	Ventral Tl10B (3)	T	14
12184	P25171	P25171	Regulator of chromosome condensation	Rcc1	Ventral Tl10B (3)	T	512
12188	P25823	P25823	Maternal protein tudor	tud	Ventral Tl10B (3)	T	1583
12197	P34739	P34739	Transcription termination factor 2	lds	Ventral Tl10B (3)	T	269
12269	Q0E9B5	Q0E9B5			Ventral Tl10B (3)	T	693
12481	Q7PLL6	Q7PLL6			Ventral Tl10B (3)	T	2627
12494	Q9VLL3;Q8IPF5	Q9VLL3		Akap200	Ventral Tl10B (3)	T	93
12520	Q8INM3	Q8INM3	Protein slender lobes	sle	Ventral Tl10B (3)	T	189
12528	Q8INM3	Q8INM3	Protein slender lobes	sle	Ventral Tl10B (3)	T	71
12546	Q8INM3	Q8INM3	Protein slender lobes	sle	Ventral Tl10B (3)	T	352
12580	Q8MRI4	Q8MRI4			Ventral Tl10B (3)	T	820
12582	Q8MSC4	Q8MSC4		BigH1	Ventral Tl10B (3)	T	267
12587	Q8MZI3	Q8MZI3			Ventral Tl10B (3)	T	609
13342	Q9W1G7	Q9W1G7		Nap1	Ventral Tl10B (3)	T	120
13272	Q9VY91	Q9VY91		Pdcd4	Ventral Tl10B (3)	T	18
13259	X2JKP3	X2JKP3		CG9947-RA	Ventral Tl10B (3)	T	3
13217	Q9VW73	Q9VW73		CG14184-RB	Ventral Tl10B (3)	T	58
13173	Q9VUC1	Q9VUC1		Hsc70Cb	Ventral Tl10B (3)	T	518
13141	Q9VT61	Q9VT61			Ventral Tl10B (3)	T	829
13118	Q9VRP5	Q9VRP5	Ubiquitin carboxyl-terminal hydrolase 36	scny	Ventral Tl10B (3)	T	782
13104	Q9VR17	Q9VR17		Bsg25A	Ventral Tl10B (3)	T	45
13094	Q9VQK5	Q9VQK5			Ventral Tl10B (3)	T	683
13053	Q9VNI3	Q9VNI3	UPF0609 protein CG1218	CG1218	Ventral Tl10B (3)	T	71
12936	Q9VJ87	Q9VJ87	Pre-mRNA-splicing factor CWC22 homolog	ncm	Ventral Tl10B (3)	T	201
12874	Q9VGP4	Q9VGP4		Ranbp9	Ventral Tl10B (3)	T	928
10841	Q9W526	Q9W526		EG:67A9.2	Ventral Tl10B (3)	S	388
7505	Q9VC45	Q9VC45	Protein abnormal spindle	asp	Ventral Tl10B (3)	S	501
4456	X2JCP8	X2JCP8	Actin-5C;Actin-42A	Act5C;Act42A	Ventral Tl10B (3)	S	324
3383	M9NEW2	M9NEW2	Histone acetyltransferase	chm	Ventral Tl10B (3)	S	98
3382	M9NEW2	M9NEW2	Histone acetyltransferase	chm	Ventral Tl10B (3)	S	97
2339	B7Z0D7	B7Z0D7			Ventral Tl10B (3)	S	124
2338	B7Z0D7	B7Z0D7			Ventral Tl10B (3)	S	123
11930	M9NDR2	M9NDR2	Protein bicaudal D	BicD	Ventral Tl10B (3)	T	306
13331	Q9W0L7	Q9W0L7		Usp10	Ventral Tl10B (3)	T	538
987	A0A0B4KHY6	A0A0B4KHY6	DNA-binding protein Ets97D	Ets97D	Ventral Tl10B (3)	S	167
11806	E1JHA4	E1JHA4	Heterogeneous nuclear ribonucleoprotein 27C	Hrb27C	Ventral Tl10B (3)	T	186
11427	E1JH52	E1JH52	Probable lysine-specific demethylase 4B	Kdm4B	Ventral Tl10B (3)	T	451
10201	Q9VZY0	Q9VZY0		Non2	Ventral Tl10B (3)	S	129
9890	X2JKP3	X2JKP3		CG9947-RA	Ventral Tl10B (3)	S	11
9365	Q9VU34	Q9VU34		MICAL-like	Ventral Tl10B (3)	S	481
8649	Q9VME5	Q9VME5		slam	Ventral Tl10B (3)	S	580
7972	Q9VGF8	Q9VGF8		CG12213-RB	Ventral Tl10B (3)	S	397
7780	Q9VDP8	Q9VDP8		mdlc	Ventral Tl10B (3)	S	329
7779	Q9VDP8	Q9VDP8		mdlc	Ventral Tl10B (3)	S	327
7579	Q9VC94	Q9VC94			Ventral Tl10B (3)	S	1112
6659	Q94546	Q94546	Another transcription unit protein	Atu	Ventral Tl10B (3)	S	666
6373	Q8IRD2	Q8IRD2		YT521-B	Ventral Tl10B (3)	S	211
6367	Q8IRB5	Q8IRB5	Claspin homolog	CG32251	Ventral Tl10B (3)	S	64
6346	Q8IRB5	Q8IRB5	Claspin homolog	CG32251	Ventral Tl10B (3)	S	1094
5605	Q7K738	Q7K738		Ubc10	Ventral Tl10B (3)	S	12
5169	Q32KD2	Q32KD2	Histone-lysine N-methyltransferase eggless	egg	Ventral Tl10B (3)	S	343
5163	Q2PE14	Q2PE14	Zinc finger CCHC domain-containing protein 8 homolog	CG4622	Ventral Tl10B (3)	S	421
2892	E4NKG1	E4NKG1	Caprin homolog	Capr	Ventral Tl10B (3)	S	260
1710	A1ZAW3	A1ZAW3		RhoGAP54D	Ventral Tl10B (3)	S	500
1160	A0A0B4LFL2	A0A0B4LFL2	Eukaryotic translation initiation factor 3 subunit C	eIF3-S8	Ventral Tl10B (3)	S	185
12186	P25171	P25171	Regulator of chromosome condensation	Rcc1	Ventral Tl10B (3)	T	477
12862	Q9VFE6	Q9VFE6	RRP15-like protein	CG3817	Ventral Tl10B (3)	T	219
464	A0A0B4K863	A0A0B4K863	Centrosomin	cnn	Ventral Tl10B (3)	S	1292
74	A0A0B4JCV4	A0A0B4JCV4		tacc	Ventral spn27A (4)	S	332
245	Q9VG78	Q9VG78		pps	Ventral spn27A (4)	S	1804
3982	M9PGP7	M9PGP7			Ventral spn27A (4)	S	1145
4235	O46043	O46043	Poly(ADP-ribose) glycohydrolase	Parg	Ventral spn27A (4)	S	24
4648	P34739	P34739	Transcription termination factor 2	lds	Ventral spn27A (4)	S	10
6912	Q9U5L1	Q9U5L1	Signal recognition particle receptor subunit alpha homolog	Gtp-bp	Ventral spn27A (4)	S	179
7191	Q9V6U8	Q9V6U8	Nedd8-activating enzyme E1 catalytic subunit	Uba3	Ventral spn27A (4)	S	379
8087	Q9VHC8	Q9VHC8			Ventral spn27A (4)	S	125
8475	Q9VKP5	Q9VKP5			Ventral spn27A (4)	S	442
9296	Q9VTE2	Q9VTE2	Protein suppressor of underreplication	SuUR	Ventral spn27A (4)	S	731
9342	Q9VTT3	Q9VTT3		ssp	Ventral spn27A (4)	S	294
9537	Q9VUX1	Q9VUX1		mRpS31	Ventral spn27A (4)	S	41
11651	A4V3G8	A4V3G8	Nucleosomal histone kinase 1	ball	Ventral spn27A (4)	T	469
12365	Q7JQH9	Q7JQH9		whd	Ventral spn27A (4)	T	689
12408	Q7K4G8	Q7K4G8			Ventral spn27A (4)	T	391
12773	Q9VBU7	Q9VBU7		Nup358	Ventral spn27A (4)	T	154
12781	Q9VC08	Q9VC08		Mink	Ventral spn27A (4)	T	71
13205	Q9VVG9	Q9VVG9			Ventral spn27A (4)	T	229
1893	A4V3G8	A4V3G8	Nucleosomal histone kinase 1	ball	Ventral spn27A (4)	S	462
140	E1JJ72	E1JJ72	Transcription initiation factor TFIID subunit 1	Taf1	Ventral spn27A (4)	S	197
158	A0A126GUS7	A0A126GUS7	Fragile X mental retardation syndrome-related protein 1	Fmr1	Ventral spn27A (4)	S	600
237	Q9VG78	Q9VG78		pps	Ventral spn27A (4)	S	899
244	Q9VG78	Q9VG78		pps	Ventral spn27A (4)	S	1803
404	A0A0B4LFF8	A0A0B4LFF8		RhoGEF2	Ventral spn27A (4)	S	548
449	A0A0B4K833	A0A0B4K833	Calcineurin subunit B type 2	CanB2	Ventral spn27A (4)	S	35
462	A0A0B4K863	A0A0B4K863	Centrosomin	cnn	Ventral spn27A (4)	S	135
534	A0A0B4KEK1	A0A0B4KEK1	Enhancer of polycomb-like protein	E(Pc)	Ventral spn27A (4)	S	565
585	Q9N693	Q9N693		sbb	Ventral spn27A (4)	S	1108
590	A0A0B4KEY6;A0A0B4KFA4	A0A0B4KFA4	Patronin	Patronin	Ventral spn27A (4)	S	531
1172	A0A0B4LFQ2	A0A0B4LFQ2		Incenp	Ventral spn27A (4)	S	402
1035	A0A0B4KI59	A0A0B4KI59			Ventral spn27A (4)	S	216
782	A0A0B4KG81	A0A0B4KG81	Protein dopey-1 homolog	CG15099	Ventral spn27A (4)	S	604
789	A0A0B4KG83	A0A0B4KG83	Actin-related protein 5	Arp5	Ventral spn27A (4)	S	471
790	A0A0B4KG83	A0A0B4KG83	Actin-related protein 5	Arp5	Ventral spn27A (4)	S	473
826	A0A0B4KGL6	A0A0B4KGL6	Metaxin-1 homolog	CG9393	Ventral spn27A (4)	S	259
880	A0A0B4KH28	A0A0B4KH28		Synd	Ventral spn27A (4)	S	181
917	A0A0B4LIK5	A0A0B4LIK5	Ubiquitin carboxyl-terminal hydrolase	puf	Ventral spn27A (4)	S	2399
967	A0A0B4KHR6	A0A0B4KHR6	Histone-lysine N-methyltransferase;Probable histone-lysine N-methyltransferase Mes-4	Mes-4	Ventral spn27A (4)	S	555
976	A0A0B4KHU6	A0A0B4KHU6	Protein distal antenna	dan	Ventral spn27A (4)	S	499
1001	A0A0B4KHZ0	A0A0B4KHZ0		woc	Ventral spn27A (4)	S	79
1010	A0A0B4KHZ0	A0A0B4KHZ0		woc	Ventral spn27A (4)	S	1082
1318	A0A0B4LHR3	A0A0B4LHR3		XNP	Ventral spn27A (4)	S	2
1328	Q8IMF8	Q8IMF8		heph	Ventral spn27A (4)	S	4
1387	A0A0S0X2W5;Q960D3	Q960D3		FDY;vig2	Ventral spn27A (4)	S	262
1479	A1Z6I7	A1Z6I7		BubR1	Ventral spn27A (4)	S	534
1480	A1Z6I7	A1Z6I7		BubR1	Ventral spn27A (4)	S	535
1521	A1Z7L1	A1Z7L1		FANCI	Ventral spn27A (4)	S	1367
1522	A1Z7L1	A1Z7L1		FANCI	Ventral spn27A (4)	S	1368
1537	A1Z803	A1Z803		CG1665-RA	Ventral spn27A (4)	S	295
1544	A1Z898	A1Z898		Caf1-105	Ventral spn27A (4)	S	424
1794	A1ZBW6	A1ZBW6			Ventral spn27A (4)	S	611
1934	A4V488	A4V488	Inosine-5'-monophosphate dehydrogenase	ras	Ventral spn27A (4)	S	435
1988	O61380	O61380		eIF4G	Ventral spn27A (4)	S	1197
2142	A8JV18	A8JV18	Nuclear pore complex protein Nup153	Nup153	Ventral spn27A (4)	S	31
2271	B7Z002	B7Z002		kis	Ventral spn27A (4)	S	964
2320	B7Z067	B7Z067	E3 ubiquitin-protein ligase Nedd-4	Nedd4	Ventral spn27A (4)	S	320
2359	B7Z0I7	B7Z0I7		Snup	Ventral spn27A (4)	S	317
2398	B7Z0I8	B7Z0I8			Ventral spn27A (4)	S	2637
2413	B7Z0I8	B7Z0I8			Ventral spn27A (4)	S	2046
2424	B7Z0I8	B7Z0I8			Ventral spn27A (4)	S	1890
2499	X2J9A4	X2J9A4		Trp1	Ventral spn27A (4)	S	313
2575	E1JGK6	E1JGK6	Maternal effect protein staufen	stau	Ventral spn27A (4)	S	563
2660	M9PE12	M9PE12	Nucleosome-remodeling factor subunit NURF301	E(bx)	Ventral spn27A (4)	S	2262
2684	M9PIA6	M9PIA6	Chromodomain-helicase-DNA-binding protein Mi-2 homolog	Mi-2	Ventral spn27A (4)	S	1559
2800	E1JJN9	E1JJN9	Histone-lysine N-methyltransferase;Probable histone-lysine N-methyltransferase CG1716	Set2	Ventral spn27A (4)	S	1089
2836	E2QC61	E2QC61	Probable RNA methyltransferase bin3	bin3	Ventral spn27A (4)	S	688
2945	H0RNK7	H0RNK7	RNA polymerase-associated protein Rtf1	Rtf1-RA;Rtf1	Ventral spn27A (4)	S	47
2955	H1UUB1	H1UUB1		Syb-RA	Ventral spn27A (4)	S	8
3023	L0MLQ9	L0MLQ9		4E-T	Ventral spn27A (4)	S	384
3033	L0MLQ9	L0MLQ9		4E-T	Ventral spn27A (4)	S	358
3064	M9MRD9	M9MRD9		PAPLA1	Ventral spn27A (4)	S	530
3182	M9NCM6	M9NCM6	Protein split ends	spen	Ventral spn27A (4)	S	2083
3183	M9NCM6	M9NCM6	Protein split ends	spen	Ventral spn27A (4)	S	2086
3312	M9NDR2	M9NDR2	Protein bicaudal D	BicD	Ventral spn27A (4)	S	103
3341	M9NEA7;M9NG31	M9NEA7	'Defective chorion-1 protein, FC125 isoform;Defective chorion-1 protein, FC106 isoform;Defective chorion-1 protein, FC106 isoform...' <Preview truncated at 128 characters>	2001-12-01	Ventral spn27A (4)	S	487
13550	X2JD55	X2JD55	Vitellogenin-1	Yp1	Ventral spn27A (4)	Y	438
13524	A0A0B4KHS6	A0A0B4KHS6	Signal transducer and activator of transcription;Signal transducer and transcription activator	Stat92E	Ventral spn27A (4)	Y	585
13470	Q9XZ34	Q9XZ34		Rif1	Ventral spn27A (4)	T	1197
13385	Q9W363	Q9W363		mxc	Ventral spn27A (4)	T	572
13384	Q9W363	Q9W363		mxc	Ventral spn27A (4)	T	132
13308	Q9VZ60	Q9VZ60			Ventral spn27A (4)	T	1000
13220	Q9VWD0	Q9VWD0		parvin	Ventral spn27A (4)	T	14
12947	Q9VK04;Q9VK06	Q9VK06	Phospholipid-transporting ATPase	CG31729-RA;CG6263	Ventral spn27A (4)	T	682
12733	Q9V9U3	Q9V9U3			Ventral spn27A (4)	T	252
12722	Q9V6K1	Q9V6K1	Tripeptidyl-peptidase 2	TppII	Ventral spn27A (4)	T	1158
12684	Q9V3H9	Q9V3H9		Nab2	Ventral spn27A (4)	T	697
12663	Q9I7T7	Q9I7T7	La-related protein CG11505	CG11505	Ventral spn27A (4)	T	1411
12612	Q94517	Q94517	Histone deacetylase Rpd3	Rpd3	Ventral spn27A (4)	T	457
12607	Q8SY69	Q8SY69			Ventral spn27A (4)	T	2
12584	Q8MSC4	Q8MSC4		BigH1	Ventral spn27A (4)	T	340
12544	Q8INM3	Q8INM3	Protein slender lobes	sle	Ventral spn27A (4)	T	168
12523	Q8INM3	Q8INM3	Protein slender lobes	sle	Ventral spn27A (4)	T	563
12496	Q9VLL3;Q8IPF5	Q9VLL3		Akap200	Ventral spn27A (4)	T	49
12493	Q9VLL3;Q8IPF5	Q9VLL3		Akap200	Ventral spn27A (4)	T	76
12393	Q7K1Q6	Q7K1Q6		Jabba	Ventral spn27A (4)	T	303
12218	P46863	P46863	Bipolar kinesin KRP-130	Klp61F	Ventral spn27A (4)	T	1045
12192	P29746	P29746	Protein bangles and beads	bnb	Ventral spn27A (4)	T	86
12183	P25171	P25171	Regulator of chromosome condensation	Rcc1	Ventral spn27A (4)	T	442
11890	M9MS15	M9MS15	Neurotactin	Nrt	Ventral spn27A (4)	T	42
11855	Q8IRC1	Q8IRC1		ens	Ventral spn27A (4)	T	649
11850	E4NKG1	E4NKG1	Caprin homolog	Capr	Ventral spn27A (4)	T	738
11816	M9PE12	M9PE12	Nucleosome-remodeling factor subunit NURF301	E(bx)	Ventral spn27A (4)	T	1173
11747	B7Z0B0	B7Z0B0		sowah	Ventral spn27A (4)	T	178
11650	A4V3G8	A4V3G8	Nucleosomal histone kinase 1	ball	Ventral spn27A (4)	T	467
11503	A0A0B4KHZ0	A0A0B4KHZ0		woc	Ventral spn27A (4)	T	364
11494	A0A0B4KHU6	A0A0B4KHU6	Protein distal antenna	dan	Ventral spn27A (4)	T	495
11415	A8DY98	A8DY98		CG7701;CG30015-RB	Ventral spn27A (4)	T	689
11407	A0A0B4KEY6;A0A0B4KFA4	A0A0B4KFA4	Patronin	Patronin	Ventral spn27A (4)	T	529
11259	X2JE45	X2JE45	Non-lysosomal glucosylceramidase	CG33090	Ventral spn27A (4)	S	520
11102	Q9Y145	Q9Y145		BcDNA.GH04978	Ventral spn27A (4)	S	179
11022	Q9XZ53	Q9XZ53		OstStt3	Ventral spn27A (4)	S	455
10896	Q9W5R5	Q9W5R5		Slmap	Ventral spn27A (4)	S	557
10674	Q9W3S4	Q9W3S4			Ventral spn27A (4)	S	3
10567	Q9W394	Q9W394			Ventral spn27A (4)	S	237
10566	Q9W394	Q9W394			Ventral spn27A (4)	S	235
10553	Q9W363	Q9W363		mxc	Ventral spn27A (4)	S	571
10521	Q9W2V7	Q9W2V7		Psf3	Ventral spn27A (4)	S	197
10309	Q9W198	Q9W198		ocm	Ventral spn27A (4)	S	905
10170	Q9VZE6	Q9VZE6	Ribosome biogenesis protein BRX1 homolog	CG11583	Ventral spn27A (4)	S	253
10159	Q9VZ60	Q9VZ60			Ventral spn27A (4)	S	147
10121	X2JEU3	X2JEU3		CG1737-RA	Ventral spn27A (4)	S	87
10108	Q9VYY7	Q9VYY7		HP5	Ventral spn27A (4)	S	693
9899	Q9VXG1	Q9VXG1	Zinc finger protein hangover	hang	Ventral spn27A (4)	S	695
9707	Q9VWD5	Q9VWD5			Ventral spn27A (4)	S	250
9653	Q9VVX5	Q9VVX5	Lysophospholipid acyltransferase 5	nes	Ventral spn27A (4)	S	480
9567	Q9VV74	Q9VV74	Survival motor neuron protein	Smn	Ventral spn27A (4)	S	64
9501	Q9VUM0	Q9VUM0	Probable DNA mismatch repair protein Msh6	Msh6	Ventral spn27A (4)	S	97
9307	Q9VTG0	Q9VTG0		NaPi-III	Ventral spn27A (4)	S	266
9297	Q9VTE2	Q9VTE2	Protein suppressor of underreplication	SuUR	Ventral spn27A (4)	S	946
9295	Q9VTE2	Q9VTE2	Protein suppressor of underreplication	SuUR	Ventral spn27A (4)	S	486
9248	Q9VT38	Q9VT38			Ventral spn27A (4)	S	310
9245	Q9VT00	Q9VT00		Jarid2	Ventral spn27A (4)	S	1687
9075	Q9VR17	Q9VR17		Bsg25A	Ventral spn27A (4)	S	76
9067	Q9VQZ8	Q9VQZ8			Ventral spn27A (4)	S	796
9054	Q9VQS4	Q9VQS4		Spindly	Ventral spn27A (4)	S	652
9026	Q9VQF5	Q9VQF5		Cwc25	Ventral spn27A (4)	S	369
9012	Q9VQD8	Q9VQD8	Actin-related protein 2/3 complex subunit 5	Arpc5	Ventral spn27A (4)	S	6
8951	Q9VPP5	Q9VPP5	Ribonuclease H2 subunit A	CG13690	Ventral spn27A (4)	S	2
8949	Q9VPN5	Q9VPN5		Hop	Ventral spn27A (4)	S	145
8899	Q9VPC0	Q9VPC0	Serine/threonine-protein kinase PITSLRE	Pitslre	Ventral spn27A (4)	S	886
8891	Q9VP77	Q9VP77			Ventral spn27A (4)	S	48
8837	Q9VNI5	Q9VNI5			Ventral spn27A (4)	S	678
8836	Q9VNI5	Q9VNI5			Ventral spn27A (4)	S	673
8824	Q9VNH6	Q9VNH6	Exocyst complex component 4	sec8	Ventral spn27A (4)	S	471
8747	Q9VND7	Q9VND7			Ventral spn27A (4)	S	280
8552	Q9VL89	Q9VL89	Methionine aminopeptidase 2	und	Ventral spn27A (4)	S	43
8476	Q9VKP5	Q9VKP5			Ventral spn27A (4)	S	438
8474	Q9VKP5	Q9VKP5			Ventral spn27A (4)	S	440
8468	Q9VKK1	Q9VKK1	Enhancer of mRNA-decapping protein 4 homolog	Ge-1	Ventral spn27A (4)	S	558
8444	Q9VKJ1	Q9VKJ1	MPN domain-containing protein CG4751	CG4751	Ventral spn27A (4)	S	699
8404	Q9VK43	Q9VK43		A16	Ventral spn27A (4)	S	14
8285	Q9VJ12	Q9VJ12		Acn	Ventral spn27A (4)	S	644
8284	Q9VJ12	Q9VJ12		Acn	Ventral spn27A (4)	S	641
8283	Q9VJ12	Q9VJ12		Acn	Ventral spn27A (4)	S	639
8282	Q9VJ12	Q9VJ12		Acn	Ventral spn27A (4)	S	637
8281	Q9VJ12	Q9VJ12		Acn	Ventral spn27A (4)	S	12
8279	Q9VJ12	Q9VJ12		Acn	Ventral spn27A (4)	S	10
8266	Q9VIZ3	Q9VIZ3		l(2)37Cb	Ventral spn27A (4)	S	228
8229	Q9VIK6	Q9VIK6		Cen	Ventral spn27A (4)	S	319
8209	Q9VIE6	Q9VIE6	Protein MCM10 homolog	Mcm10	Ventral spn27A (4)	S	88
8196	Q9VID9	Q9VID9			Ventral spn27A (4)	S	1051
8159	Q9VI21	Q9VI21		Dmtn	Ventral spn27A (4)	S	208
8109	Q9VHJ3	Q9VHJ3		E(var)3-9	Ventral spn27A (4)	S	552
8078	Q9VHC7	Q9VHC7		rump	Ventral spn27A (4)	S	260
8029	Q9VGW7	Q9VGW7		Art1	Ventral spn27A (4)	S	38
8024	Q9VGR1	Q9VGR1		GCC88	Ventral spn27A (4)	S	61
8009	Q9VGL0	Q9VGL0			Ventral spn27A (4)	S	355
8008	Q9VGL0	Q9VGL0			Ventral spn27A (4)	S	351
7940	Q9VG03	Q9VG03			Ventral spn27A (4)	S	259
7860	Q9VEN9	Q9VEN9		Patr-1	Ventral spn27A (4)	S	664
7823	Q9VE79	Q9VE79			Ventral spn27A (4)	S	602
7785	Q9VDP8	Q9VDP8		mdlc	Ventral spn27A (4)	S	255
7765	Q9VDK7	Q9VDK7	Signal recognition particle subunit SRP72	Srp72	Ventral spn27A (4)	S	540
7763	Q9VDG2	Q9VDG2	RalA-binding protein 1	Rlip	Ventral spn27A (4)	S	5
7692	Q9VCU8	Q9VCU8			Ventral spn27A (4)	S	20
7679	Q9VCP0	Q9VCP0	Transcription elongation factor B polypeptide 3	EloA	Ventral spn27A (4)	S	252
7532	Q9VC60	Q9VC60			Ventral spn27A (4)	S	423
7471	Q9VC08	Q9VC08		Mink	Ventral spn27A (4)	S	376
7317	Q9VAW1	Q9VAW1		Moca-cyp	Ventral spn27A (4)	S	430
7235	Q9V9Z8	Q9V9Z8			Ventral spn27A (4)	S	337
7218	Q9V9U3	Q9V9U3			Ventral spn27A (4)	S	391
7201	Q9V7W9	Q9V7W9		NiPp1	Ventral spn27A (4)	S	355
7165	Q9V4P1	Q9V4P1	Actin-binding protein anillin	scra	Ventral spn27A (4)	S	64
6971	Q9V3H9	Q9V3H9		Nab2	Ventral spn27A (4)	S	706
6821	Q961D9	Q961D9	Protein BCL9 homolog	lgs	Ventral spn27A (4)	S	59
6741	Q95RR6	Q95RR6		Pur-alpha	Ventral spn27A (4)	S	38
6714	Q94883	Q94883		Dref	Ventral spn27A (4)	S	45
6706	Q94546	Q94546	Another transcription unit protein	Atu	Ventral spn27A (4)	S	175
6649	Q94524	Q94524	Dynein light chain Tctex-type	Dlc90F	Ventral spn27A (4)	S	8
6614	Q8T4A9	Q8T4A9		Rrp45	Ventral spn27A (4)	S	332
6464	Q9VQV2	Q9VQV2		Reph	Ventral spn27A (4)	S	268
6282	Q8IQ95	Q8IQ95		pbl	Ventral spn27A (4)	S	321
6207	Q8INM3	Q8INM3	Protein slender lobes	sle	Ventral spn27A (4)	S	61
6102	Q8IMX8	Q8IMX8		LSm3	Ventral spn27A (4)	S	9
6013	Q9VLL3;Q8IPF5	Q9VLL3		Akap200	Ventral spn27A (4)	S	6
6006	Q86BI3	Q86BI3		Zn72D	Ventral spn27A (4)	S	867
5876	Q9W4C4	Q9W4C4		spoon	Ventral spn27A (4)	S	259
5855	Q9VT60	Q9VT60		iPLA2-VIA	Ventral spn27A (4)	S	527
5722	Q7KRW8	Q7KRW8	Pre-mRNA-processing factor 39	CG1646	Ventral spn27A (4)	S	25
5680	Q7KN62	Q7KN62	Transitional endoplasmic reticulum ATPase TER94	TER94	Ventral spn27A (4)	S	4
5643	Q7KMH9	Q7KMH9		wde	Ventral spn27A (4)	S	392
5571	Q7K4G8	Q7K4G8			Ventral spn27A (4)	S	369
5565	Q7K4G8	Q7K4G8			Ventral spn27A (4)	S	393
5447	Q7K0S5	Q7K0S5		Gint3	Ventral spn27A (4)	S	85
5446	Q7K0L8	Q7K0L8		FLASH	Ventral spn27A (4)	S	746
5384	Q7JVY2	Q7JVY2		dup	Ventral spn27A (4)	S	393
5383	Q7JVY2	Q7JVY2		dup	Ventral spn27A (4)	S	391
5379	Q7JVY2	Q7JVY2		dup	Ventral spn27A (4)	S	111
5375	Q7JVY2	Q7JVY2		dup	Ventral spn27A (4)	S	641
5349	Q7JRH5	Q7JRH5			Ventral spn27A (4)	S	342
5265	Q5LJZ2	Q5LJZ2	Histone-lysine N-methyltransferase SETD1	Set1	Ventral spn27A (4)	S	589
5253	Q5LJZ2	Q5LJZ2	Histone-lysine N-methyltransferase SETD1	Set1	Ventral spn27A (4)	S	1447
4983	Q24050	Q24050		anon-i1	Ventral spn27A (4)	S	192
4978	Q23976	Q23976	ATP-dependent DNA helicase 2 subunit 1	Irbp	Ventral spn27A (4)	S	530
4964	Q0KHZ9	Q0KHZ9		Cnx99A	Ventral spn27A (4)	S	569
4893	Q0E8E5	Q0E8E5		CG7255-RE	Ventral spn27A (4)	S	22
4877	Q05913	Q05913	General transcription factor IIF subunit 1	TfIIFalpha	Ventral spn27A (4)	S	355
4837	P98159	P98159	Serine protease nudel	ndl	Ventral spn27A (4)	S	215
4835	P92177	P92177	14-3-3 protein epsilon	14-3-3epsilon	Ventral spn27A (4)	S	262
4728	X2JCS6	X2JCS6	60S ribosomal protein L7a	RpL7A	Ventral spn27A (4)	S	111
4616	P29746	P29746	Protein bangles and beads	bnb	Ventral spn27A (4)	S	428
4443	P07664	P07664	Serendipity locus protein delta	Sry-delta	Ventral spn27A (4)	S	140
4416	P05389	P05389	60S acidic ribosomal protein P2	RpLP2	Ventral spn27A (4)	S	102
4415	P05389	P05389	60S acidic ribosomal protein P2	RpLP2	Ventral spn27A (4)	S	100
4362	X2JD55	X2JD55	Vitellogenin-1	Yp1	Ventral spn27A (4)	S	291
4355	X2JD55	X2JD55	Vitellogenin-1	Yp1	Ventral spn27A (4)	S	420
4334	Q4ABE3	Q4ABE3	Histone H1	His1:CG33801;His1:CG33807;His1:CG33834;His1:CG33861;His1	Ventral spn27A (4)	S	9
4316	O77430	O77430		SkpA	Ventral spn27A (4)	S	145
4179	O16043	O16043		Df31	Ventral spn27A (4)	S	179
4056	M9PHL0	M9PHL0	Supporter of activation of yellow protein	e(y)3	Ventral spn27A (4)	S	759
3877	M9PFZ1;Q7KTV5	Q7KTV5		Nopp140	Ventral spn27A (4)	S	232
3838	M9PI89	M9PI89	Cyclin-T	CycT	Ventral spn27A (4)	S	162
3775	Q7KUD6	Q7KUD6	Anion exchange protein		Ventral spn27A (4)	S	137
3769	M9PEJ1	M9PEJ1		mge	Ventral spn27A (4)	S	18
3687	M9PD27	M9PD27	Eukaryotic peptide chain release factor subunit 1	eRF1	Ventral spn27A (4)	S	2
3647	M9PCX3	M9PCX3	Kinesin-like protein	cmet	Ventral spn27A (4)	S	1001
3633	M9PCN6	M9PCN6	Protein numb	numb	Ventral spn27A (4)	S	337
3560	M9PBL3	M9PBL3	Heat shock protein 83	Hsp83	Ventral spn27A (4)	S	300
3513	M9PB85	M9PB85	UPF0430 protein CG31712	CG31712	Ventral spn27A (4)	S	77
3496	M9PB68	M9PB68	Protein purity of essence	poe	Ventral spn27A (4)	S	1168
3427	M9NFQ5	M9NFQ5	Protein furry	fry	Ventral spn27A (4)	S	2936
17	A0A023GQ99	A0A023GQ99	H/ACA ribonucleoprotein complex non-core subunit NAF1	CG10341	Ventral spn27A (4)	S	38
655	A0A0B4KFB8	A0A0B4KFB8		CG15187	Ventral spn27A (4)	S	16
2559	D3DMM4	D3DMM4		mfas-RJ;mfas	Ventral spn27A (4)	S	685
13134	Q9VSD7	Q9VSD7	Lariat debranching enzyme	ldbr	Ventral spn27A (4)	T	461
12008	M9PD16	M9PD16	Protein chiffon	chif	Ventral spn27A (4)	T	1081
10697	X2JIQ5	X2JIQ5	60S ribosomal protein L17	RpL17	Ventral spn27A (4)	S	8
10204	Q9VZY0	Q9VZY0		Non2	Ventral spn27A (4)	S	139
9566	Q9VV74	Q9VV74	Survival motor neuron protein	Smn	Ventral spn27A (4)	S	57
8856	Q9VP05	Q9VP05	Mediator of RNA polymerase II transcription subunit 1	MED1	Ventral spn27A (4)	S	830
8528	Q9VL71	Q9VL71		Srp54	Ventral spn27A (4)	S	500
7962	Q9VG69	Q9VG69			Ventral spn27A (4)	S	312
7733	Q9VDD2	Q9VDD2		SNF4Agamma	Ventral spn27A (4)	S	568
7022	Q9V3V6	Q9V3V6		Rpt5	Ventral spn27A (4)	S	9
6708	Q94546	Q94546	Another transcription unit protein	Atu	Ventral spn27A (4)	S	179
5850	Q7KUA4	Q7KUA4		Uba2	Ventral spn27A (4)	S	599
4882	Q05913	Q05913	General transcription factor IIF subunit 1	TfIIFalpha	Ventral spn27A (4)	S	455
4499	P17210	P17210	Kinesin heavy chain	Khc	Ventral spn27A (4)	S	560
4492	P15348	P15348	DNA topoisomerase 2	Top2	Ventral spn27A (4)	S	1344
4431	X2JEX8	X2JEX8	Vitellogenin-3	Yp3	Ventral spn27A (4)	S	24
4094	Q9VVW6	Q9VVW6		MESR6	Ventral spn27A (4)	S	21
643	A8DY98	A8DY98		CG7701;CG30015-RB	Ventral spn27A (4)	S	685
78	A0A0B4JCV4	A0A0B4JCV4		tacc	Ventral spn27A (4)	S	985
1976	X2JDY7	X2JDY7	POU domain protein;Protein nubbin	nub	Ventral Tl10B spn27A (5)	S	147
6270	Q8IQ71	Q8IQ71		dikar	Ventral Tl10B spn27A (5)	S	900
4495	P15348	P15348	DNA topoisomerase 2	Top2	Ventral Tl10B spn27A (5)	S	1410
2517	C7LAG1;Q59E36	Q59E36	REST corepressor	CoRest	Ventral Tl10B spn27A (5)	S	69
51	A0A0B4KG78;Q7K1Q6	Q7K1Q6		Jabba	Ventral Tl10B spn27A (5)	S	190
183	Q59DW9	Q59DW9		btsz	Ventral Tl10B spn27A (5)	S	387
642	A0A0B4KF92	A0A0B4KF92		Hcs	Ventral Tl10B spn27A (5)	S	340
819	A8WHL4	A8WHL4		bon	Ventral Tl10B spn27A (5)	S	813
911	A0A0B4LIK5	A0A0B4LIK5	Ubiquitin carboxyl-terminal hydrolase	puf	Ventral Tl10B spn27A (5)	S	121
1097	A0A0B4LF14	A0A0B4LF14		Pal1	Ventral Tl10B spn27A (5)	S	506
1194	Q8MLW2	Q8MLW2	Helicase domino	dom	Ventral Tl10B spn27A (5)	S	733
1293	A0A0B4LH25	A0A0B4LH25			Ventral Tl10B spn27A (5)	S	1098
1494	A1Z6Z7	A1Z6Z7			Ventral Tl10B spn27A (5)	S	14
1571	A1Z8U7	A1Z8U7		CG33964-RA	Ventral Tl10B spn27A (5)	S	5
1790	A1ZBW6	A1ZBW6			Ventral Tl10B spn27A (5)	S	296
2405	B7Z0I8	B7Z0I8			Ventral Tl10B spn27A (5)	S	2453
3167	M9NCM6	M9NCM6	Protein split ends	spen	Ventral Tl10B spn27A (5)	S	2561
3632	M9PCN6	M9PCN6	Protein numb	numb	Ventral Tl10B spn27A (5)	S	469
3753	Q7KM04	Q7KM04		Eip63E	Ventral Tl10B spn27A (5)	S	119
4359	X2JD55	X2JD55	Vitellogenin-1	Yp1	Ventral Tl10B spn27A (5)	S	364
4708	P41375	P41375	Eukaryotic translation initiation factor 2 subunit 2	eIF-2beta	Ventral Tl10B spn27A (5)	S	133
4924	Q0E8X6	Q0E8X6		eIF2B-delta	Ventral Tl10B spn27A (5)	S	212
5073	Q24560	Q24560	Tubulin beta-1 chain	betaTub56D	Ventral Tl10B spn27A (5)	S	55
5387	Q7JW03	Q7JW03		UbcE2H	Ventral Tl10B spn27A (5)	S	3
5641	Q7KMH9	Q7KMH9		wde	Ventral Tl10B spn27A (5)	S	755
5728	Q7KRW8	Q7KRW8	Pre-mRNA-processing factor 39	CG1646	Ventral Tl10B spn27A (5)	S	313
5835	Q7KU82	Q7KU82		smid	Ventral Tl10B spn27A (5)	S	89
5980	Q7YZ99	Q7YZ99			Ventral Tl10B spn27A (5)	S	747
6177	Q8INM3	Q8INM3	Protein slender lobes	sle	Ventral Tl10B spn27A (5)	S	759
6502	Q8MT78	Q8MT78			Ventral Tl10B spn27A (5)	S	145
6518	Q8SWW4	Q8SWW4			Ventral Tl10B spn27A (5)	S	919
7042	Q9V3X4	Q9V3X4	Seipin	Seipin	Ventral Tl10B spn27A (5)	S	320
7412	Q9VBP9	Q9VBP9	Nuclear protein localization protein 4 homolog	Npl4	Ventral Tl10B spn27A (5)	S	40
7706	Q9VCX1	Q9VCX1	Regulator of G-protein signaling loco	loco;loco-RC	Ventral Tl10B spn27A (5)	S	1500
7955	Q9VG59	Q9VG59		CG5608-RA	Ventral Tl10B spn27A (5)	S	680
8413	Q9VK58	Q9VK58		Pih1D1	Ventral Tl10B spn27A (5)	S	160
8551	X2J5E8	X2J5E8	FK506-binding protein 59	FKBP59	Ventral Tl10B spn27A (5)	S	310
8918	Q9VPI9	Q9VPI9		Zir	Ventral Tl10B spn27A (5)	S	142
9280	Q9VT61	Q9VT61			Ventral Tl10B spn27A (5)	S	400
9437	Q9VU84	Q9VU84	Drebrin-like protein	Abp1	Ventral Tl10B spn27A (5)	S	406
9530	Q9VUR2	Q9VUR2			Ventral Tl10B spn27A (5)	S	330
9605	Q9VVC9	Q9VVC9			Ventral Tl10B spn27A (5)	S	666
9717	X2JG50	X2JG50	Protein ELYS homolog	CG14215	Ventral Tl10B spn27A (5)	S	1831
9976	Q9VY91	Q9VY91		Pdcd4	Ventral Tl10B spn27A (5)	S	23
10242	Q9W0A9	Q9W0A9			Ventral Tl10B spn27A (5)	S	2
11125	Q9Y1T2	Q9Y1T2		Apc2	Ventral Tl10B spn27A (5)	S	617
11599	A1Z8U7	A1Z8U7		CG33964-RA	Ventral Tl10B spn27A (5)	T	2
12114	Q7KW02	Q7KW02		east	Ventral Tl10B spn27A (5)	T	236
12407	Q7K486	Q7K486	Armadillo repeat-containing protein 6 homolog	CG5721	Ventral Tl10B spn27A (5)	T	9
12559	Q8IQ95	Q8IQ95		pbl	Ventral Tl10B spn27A (5)	T	322
13003	Q9VME5	Q9VME5		slam	Ventral Tl10B spn27A (5)	T	587
13021	Q9VN21	Q9VN21		lost	Ventral Tl10B spn27A (5)	T	312
13311	Q9VZD8	Q9VZD8	THUMP domain-containing protein 1 homolog	CG15014	Ventral Tl10B spn27A (5)	T	99
13450	Q9W542	Q9W542		mip130	Ventral Tl10B spn27A (5)	T	818
13255	Q9VX98	Q9VX98	Density-regulated protein homolog	DENR	Ventral Tl10B spn27A (5)	T	78
13020	Q9VN21	Q9VN21		lost	Ventral Tl10B spn27A (5)	T	285
12976	Q9VL71	Q9VL71		Srp54	Ventral Tl10B spn27A (5)	T	469
12458	Q7KU82	Q7KU82		smid	Ventral Tl10B spn27A (5)	T	532
12139	Q4ABE3	Q4ABE3	Histone H1	His1:CG33801;His1:CG33807;His1:CG33834;His1:CG33861;His1	Ventral Tl10B spn27A (5)	T	8
11614	A1Z9S6	A1Z9S6		Su(var)2-HP2	Ventral Tl10B spn27A (5)	T	1554
11583	A1Z6Z7	A1Z6Z7			Ventral Tl10B spn27A (5)	T	33
10443	Q9W2I2	Q9W2I2			Ventral Tl10B spn27A (5)	S	7
10227	Q9W062	Q9W062		Mfap1	Ventral Tl10B spn27A (5)	S	57
9718	X2JG50	X2JG50	Protein ELYS homolog	CG14215	Ventral Tl10B spn27A (5)	S	1834
9607	Q9VVC9	Q9VVC9			Ventral Tl10B spn27A (5)	S	635
9542	Q9VUY9	Q9VUY9	Phosphoglucomutase	Pgm	Ventral Tl10B spn27A (5)	S	116
9529	Q9VUR2	Q9VUR2			Ventral Tl10B spn27A (5)	S	328
9358	Q9VTZ4	Q9VTZ4		nst	Ventral Tl10B spn27A (5)	S	264
9201	Q9VSE2	Q9VSE2		mus301	Ventral Tl10B spn27A (5)	S	12
8731	Q9VN82	Q9VN82		cno	Ventral Tl10B spn27A (5)	S	590
8511	Q9VL18	Q9VL18	Probable elongation factor 1-delta	eEF1delta	Ventral Tl10B spn27A (5)	S	137
8174	Q9VID9	Q9VID9			Ventral Tl10B spn27A (5)	S	979
7814	Q9VE54	Q9VE54			Ventral Tl10B spn27A (5)	S	815
7478	Q9VC10	Q9VC10	Prolyl 3-hydroxylase sudestada1	PIG-S;sud1	Ventral Tl10B spn27A (5)	S	5
7205	Q9V9R2	Q9V9R2		Cul2	Ventral Tl10B spn27A (5)	S	663
6745	Q95RX5	Q95RX5			Ventral Tl10B spn27A (5)	S	2
6503	Q8MZI3	Q8MZI3			Ventral Tl10B spn27A (5)	S	610
6338	Q8IRB5	Q8IRB5	Claspin homolog	CG32251	Ventral Tl10B spn27A (5)	S	1189
6081	Q8IH00	Q8IH00	Nucleolar protein 6	Mat89Ba	Ventral Tl10B spn27A (5)	S	35
5954	Q7YZ99	Q7YZ99			Ventral Tl10B spn27A (5)	S	931
5830	Q7KU82	Q7KU82		smid	Ventral Tl10B spn27A (5)	S	528
5696	Q7KQM6	Q7KQM6	PERQ amino acid-rich with GYF domain-containing protein CG11148	CG11148	Ventral Tl10B spn27A (5)	S	403
5639	Q7KMH9	Q7KMH9		wde	Ventral Tl10B spn27A (5)	S	579
5235	Q59E33	Q59E33		scaf6	Ventral Tl10B spn27A (5)	S	748
4965	Q0KHZ9	Q0KHZ9		Cnx99A	Ventral Tl10B spn27A (5)	S	544
4799	P61851	P61851	Superoxide dismutase [Cu-Zn]	Sod	Ventral Tl10B spn27A (5)	S	101
4635	P34739	P34739	Transcription termination factor 2	lds	Ventral Tl10B spn27A (5)	S	108
3907	M9PFZ1;Q7KTV5	Q7KTV5		Nopp140	Ventral Tl10B spn27A (5)	S	170
3716	M9PD95	M9PD95	NF-kappa-B inhibitor cactus	cact	Ventral Tl10B spn27A (5)	S	467
3213	M9NCM6	M9NCM6	Protein split ends	spen	Ventral Tl10B spn27A (5)	S	2910
2987	M9NDX8	M9NDX8		Spn	Ventral Tl10B spn27A (5)	S	121
1827	A2VEG3	A2VEG3			Ventral Tl10B spn27A (5)	S	758
1572	A1Z8X0	A1Z8X0		CG8490-RB	Ventral Tl10B spn27A (5)	S	3
1570	A1Z8U7	A1Z8U7		CG33964-RA	Ventral Tl10B spn27A (5)	S	3
1355	A0A0C4DHE6	A0A0C4DHE6	Serine/threonine-protein phosphatase 4 regulatory subunit 3	flfl	Ventral Tl10B spn27A (5)	S	955
1220	A0A0B4LGB0	A0A0B4LGB0		Gp150	Ventral Tl10B spn27A (5)	S	46
1098	A0A0B4LF14	A0A0B4LF14		Pal1	Ventral Tl10B spn27A (5)	S	509
975	A0A0B4KHU6	A0A0B4KHU6	Protein distal antenna	dan	Ventral Tl10B spn27A (5)	S	497
904	A0A0B4LIK5	A0A0B4LIK5	Ubiquitin carboxyl-terminal hydrolase	puf	Ventral Tl10B spn27A (5)	S	842
652	A0A0B4KFB8	A0A0B4KFB8		CG15187	Ventral Tl10B spn27A (5)	S	545
236	Q9VG78	Q9VG78		pps	Ventral Tl10B spn27A (5)	S	500
169	Q9VNA1;Q8MSQ5	Q9VNA1		mtd	Ventral Tl10B spn27A (5)	S	404
9177	Q9VS50	Q9VS50	N-acetyltransferase eco	eco	Ventral Tl10B spn27A (5)	S	351
5795	Q7KTI0	Q7KTI0	1-acyl-sn-glycerol-3-phosphate acyltransferase	fu12	Ventral Tl10B spn27A (5)	S	205
5731	Q9VB04	Q9VB04		btz	Ventral Tl10B spn27A (5)	S	301
4962	Q0KHZ9	Q0KHZ9		Cnx99A;Cnx14D	Ventral Tl10B spn27A (5)	S	560
3954	M9PG76	M9PG76	60S acidic ribosomal protein P0	RpLP0	Ventral Tl10B spn27A (5)	S	280
3039	L0MPS3	L0MPS3	Apolipophorins;Apolipophorin-2;Apolipophorin-1	Rfabg	Ventral Tl10B spn27A (5)	S	2362
2785	E1JJM8	E1JJM8	LIM domain kinase 1	LIMK1	Ventral Tl10B spn27A (5)	S	786
2728	E1JIJ9	E1JIJ9	Protein suppressor of variegation 3-7	Su(var)3-7	Ventral Tl10B spn27A (5)	S	889
9659	X2JGV8	X2JGV8	UPF0389 protein CG9231	CG9231	Ventral Tl10B spn27A (5)	S	49
13187	Q9VUN9	Q9VUN9		CG7857-RA	Ventral Tl10B spn27A (5)	T	100
35	E5DK16	E5DK16		Lpin;CG8709-RH	Ventral Tl10B spn27A (5)	S	675
7519	Q9VC54	Q9VC54			Ventral Tl10B spn27A (5)	S	793
7520	Q9VC54	Q9VC54			Ventral Tl10B spn27A (5)	S	795
5130	Q29QE1;X2JC00	Q29QE1		RhoGAP1A	Ventral Tl10B spn27A (5)	S	121
3101	M9MRT6	M9MRT6	Ras-like protein 3	R	Ventral Tl10B spn27A (5)	S	168
2252	B7Z002	B7Z002		kis	Ventral Tl10B spn27A (5)	S	3697
2093	A8JUY0	A8JUY0	RNA-binding protein 4F	Rnp4F	Ventral Tl10B spn27A (5)	S	718
10636	X2JE07	X2JE07		CG1677-RA	Ventral Tl10B spn27A (5)	S	41
12760	Q9VB05	Q9VB05		ALiX	Ventral Tl10B spn27A (5)	T	332
1982	L0MLL1	L0MLL1			Ventral Tl10B spn27A (5)	S	1243
12934	Q9VJ30	Q9VJ30		Nak	Ventral Tl10B spn27A (5)	T	490
10980	Q9XZ21	Q9XZ21		snama	Ventral Tl10B spn27A (5)	S	1088
8496	Q9VKV5	Q9VKV5	CD2 antigen cytoplasmic tail-binding protein 2 homolog	holn1	Ventral Tl10B spn27A (5)	S	117
8089	Q9VHC8	Q9VHC8			Ventral Tl10B spn27A (5)	S	174
7066	Q9V406	Q9V406		crp	Ventral Tl10B spn27A (5)	S	60
5908	Q7PLI0	Q7PLI0		p120ctn	Ventral Tl10B spn27A (5)	S	489
5581	Q7K4L8	Q7K4L8			Ventral Tl10B spn27A (5)	S	187
5041	Q24478	Q24478	Centrosome-associated zinc finger protein CP190	Cp190	Ventral Tl10B spn27A (5)	S	860
3655	M9PG46	M9PG46	Ubiquitin carboxyl-terminal hydrolase	Usp32	Ventral Tl10B spn27A (5)	S	951
3250	M9ND37	M9ND37		eIF5B	Ventral Tl10B spn27A (5)	S	458
1195	Q8MLW2	Q8MLW2	Helicase domino	dom	Ventral Tl10B spn27A (5)	S	736
402	A0A0B4LFF8	A0A0B4LFF8		RhoGEF2	Dorsal + Lateral (6)	S	1269
1675	Q8IFW6	Q8IFW6		Dek	Dorsal + Lateral (6)	S	393
6855	Q9I7F7	Q9I7F7	Tyrosine-protein kinase PR2	PR2;Ack-like	Dorsal + Lateral (6)	S	117
7918	Q9VFQ3	Q9VFQ3		E5	Dorsal + Lateral (6)	S	125
8278	Q9VJ12	Q9VJ12		Acn	Dorsal + Lateral (6)	S	187
8363	Q9VJQ4	Q9VJQ4	mRNA cap guanine-N7 methyltransferase	l(2)35Bd	Dorsal + Lateral (6)	S	22
10864	Q9W550	Q9W550		CG14805-RA	Dorsal + Lateral (6)	S	440
4470	P13468	P13468	DNA-binding protein K10	fs(1)K10	Dorsal + Lateral (6)	S	116
4111	M9PIC3	M9PIC3			Dorsal + Lateral (6)	S	42
10865	Q9W550	Q9W550		CG14805-RA	Dorsal + Lateral (6)	S	443
3006	H8F4V5	H8F4V5	Cytochrome P450 307a1	spo	Dorsal + Lateral (6)	S	457
5007	X2JKU5	X2JKU5	40S ribosomal protein S5a	RpS5a	Dorsal + Lateral (6)	S	34
4615	P29746	P29746	Protein bangles and beads	bnb	Dorsal + Lateral (6)	S	427
2436	B7Z0I8	B7Z0I8			Dorsal + Lateral (6)	S	509
370	A0A0B4K7G4	A0A0B4K7G4	DNA-binding protein modulo	mod	Dorsal + Lateral (6)	S	120
954	A0A0B4KHP8	A0A0B4KHP8	Uncharacterized protein CG4449	CG4449-RA;CG4449	Dorsal + Lateral (6)	S	94
7441	Q9VBU7	Q9VBU7		Nup358	Dorsal + Lateral (6)	S	2479
7507	Q9VC45	Q9VC45	Protein abnormal spindle	asp	Dorsal + Lateral (6)	S	151
10927	Q9XYZ4	Q9XYZ4		mre11	Dorsal + Lateral (6)	S	217
12168	P15619	P15619	Serendipity locus protein H-1	wdn	Dorsal + Lateral (6)	T	31
13070	Q9VPM5	Q9VPM5		mbm	Dorsal + Lateral (6)	T	327
13071	Q9VPM5	Q9VPM5		mbm	Dorsal + Lateral (6)	T	333
13266	Q9VXW2	Q9VXW2			Dorsal + Lateral (6)	T	171
13156	Q9VU02	Q9VU02	Probable small nuclear ribonucleoprotein Sm D1	SmD1	Dorsal + Lateral (6)	T	84
2182	B7YZQ1	B7YZQ1		slik	Dorsal + Lateral (6)	S	640
2996	M9NDX8	M9NDX8		Spn	Dorsal + Lateral (6)	S	1998
3340	M9NE97	M9NE97		Ctr1A	Dorsal + Lateral (6)	S	155
3359	M9NEL1	M9NEL1	Serine/threonine-protein phosphatase;Serine/threonine-protein phosphatase 2B catalytic subunit 3	CanA-14F	Dorsal + Lateral (6)	S	76
1650	A1Z9S6	A1Z9S6		Su(var)2-HP2	Dorsal + Lateral (6)	S	481
11652	A4V3G8	A4V3G8	Nucleosomal histone kinase 1	ball	Dorsal + Lateral (6)	T	458
11008	Q9XZ34	Q9XZ34		Rif1	Dorsal + Lateral (6)	S	847
1894	A4V3G8	A4V3G8	Nucleosomal histone kinase 1	ball	Dorsal + Lateral (6)	S	457
2134	Q9W3W1	Q9W3W1	Coronin	pod1	Dorsal + Lateral (6)	S	418
2422	B7Z0I8	B7Z0I8			Dorsal + Lateral (6)	S	1165
3246	M9ND37	M9ND37		eIF5B	Dorsal + Lateral (6)	S	19
3873	M9PFZ1;Q7KTV5	Q7KTV5		Nopp140	Dorsal + Lateral (6)	S	225
4665	P35600	P35600	Replication factor C subunit 1	Gnf1	Dorsal + Lateral (6)	S	128
9194	Q9VSC5	Q9VSC5			Dorsal + Lateral (6)	S	238
9429	Q9VU76	Q9VU76		cmb	Dorsal + Lateral (6)	S	1584
10510	Q9W2U7	Q9W2U7		nocte	Dorsal + Lateral (6)	S	1061
10548	Q9W363	Q9W363		mxc	Dorsal + Lateral (6)	S	140
56	A0A0B4JCV4	A0A0B4JCV4		tacc	Dorsal + Lateral (6)	S	816
67	A0A0B4JCV4	A0A0B4JCV4		tacc	Dorsal + Lateral (6)	S	926
206	A0A0B4K680	A0A0B4K680	Histone-lysine N-methyltransferase pr-set7	pr-set7	Dorsal + Lateral (6)	S	366
235	A0A0B4K6D6	A0A0B4K6D6	Putative transcription factor capicua	cic	Dorsal + Lateral (6)	S	512
296	A0A126GUM8	A0A126GUM8	Protein lingerer	lig;lig-RA	Dorsal + Lateral (6)	S	27
440	A0A0B4K7Y7	A0A0B4K7Y7	La-related protein 1	larp	Dorsal + Lateral (6)	S	1587
484	A0A0B4K863	A0A0B4K863	Centrosomin	cnn	Dorsal + Lateral (6)	S	843
872	Q9VC89	Q9VC89			Dorsal + Lateral (6)	S	508
955	A0A0B4KHP8	A0A0B4KHP8	Uncharacterized protein CG4449	CG4449-RA;CG4449	Dorsal + Lateral (6)	S	96
958	A0A0B4KHP8	A0A0B4KHP8	Uncharacterized protein CG4449	CG4449-RA;CG4449	Dorsal + Lateral (6)	S	146
1117	A0A0B4LFF9	A0A0B4LFF9		Inr-a	Dorsal + Lateral (6)	S	683
1153	A0A0B4LFJ4	A0A0B4LFJ4	Transmembrane protein 131 homolog	CG8370	Dorsal + Lateral (6)	S	1258
1180	A0A0B4LGV3	A0A0B4LGV3		MESR4	Dorsal + Lateral (6)	S	1495
1302	A0A0B4LH99	A0A0B4LH99	Protein TAPT1 homolog	CG7218	Dorsal + Lateral (6)	S	651
1348	A0A0C4DHC2	A0A0C4DHC2	Zinc finger protein jing	jing	Dorsal + Lateral (6)	S	1121
1457	A1Z6H4	A1Z6H4		vlc	Dorsal + Lateral (6)	S	300
1713	A1ZAW3	A1ZAW3		RhoGAP54D	Dorsal + Lateral (6)	S	99
1935	A4V4A1	A4V4A1	Kinesin-like protein;Kinesin-like protein Klp10A	Klp10A	Dorsal + Lateral (6)	S	797
2014	M9PBL6	M9PBL6		kst	Dorsal + Lateral (6)	S	3752
2350	B7Z0E2	B7Z0E2		Unr	Dorsal + Lateral (6)	S	398
2553	D0Z760	D0Z760	Polycomb group protein Psc	Psc-RA;Psc	Dorsal + Lateral (6)	S	713
2614	E1JHE1	E1JHE1	Kinesin-like protein	Klp31E	Dorsal + Lateral (6)	S	1018
2682	M9PIA6	M9PIA6	Chromodomain-helicase-DNA-binding protein Mi-2 homolog	Mi-2	Dorsal + Lateral (6)	S	304
2819	E1JJS2	E1JJS2		RhoGAP19D	Dorsal + Lateral (6)	S	1821
2931	G4LTX1	G4LTX1	Transmembrane protein 11 homolog, mitochondrial	PGRP-LD-RB;Pmi	Dorsal + Lateral (6)	S	25
2965	M9NDX8	M9NDX8		Spn	Dorsal + Lateral (6)	S	917
3112	M9MS02	M9MS02	Protein suppressor of white apricot	su(w[a])	Dorsal + Lateral (6)	S	433
3220	M9NCX1	M9NCX1	Lethal(2) giant larvae protein	l(2)gl	Dorsal + Lateral (6)	S	869
3353	M9NED8	M9NED8	Breast carcinoma-amplified sequence 3 homolog	rudhira	Dorsal + Lateral (6)	S	894
3360	M9NEL1	M9NEL1	Serine/threonine-protein phosphatase;Serine/threonine-protein phosphatase 2B catalytic subunit 3	CanA-14F	Dorsal + Lateral (6)	S	77
3407	M9NFA7	M9NFA7	E3 ubiquitin-protein ligase UBR1	Ubr1;UBR1	Dorsal + Lateral (6)	S	19
3638	M9PCQ8	M9PCQ8	Insulin receptor substrate 1	chico	Dorsal + Lateral (6)	S	502
3808	M9PF24	M9PF24	Kinesin light chain	Klc	Dorsal + Lateral (6)	S	485
3815	M9PFF0	M9PFF0	60S ribosomal protein L13	RpL13	Dorsal + Lateral (6)	S	138
4181	O16043	O16043		Df31	Dorsal + Lateral (6)	S	82
4255	O46067	O46067		EG:25E8.1	Dorsal + Lateral (6)	S	564
4303	O76906	O76906	Protein cramped	crm	Dorsal + Lateral (6)	S	437
4345	X2JC82	X2JC82	Heat shock protein 27	Hsp27	Dorsal + Lateral (6)	S	205
4352	X2JD55	X2JD55	Vitellogenin-1	Yp1	Dorsal + Lateral (6)	S	28
4464	P11455	P11455	Protein terminus	term	Dorsal + Lateral (6)	S	310
4557	P23128	P23128	Putative ATP-dependent RNA helicase me31b	me31B	Dorsal + Lateral (6)	S	29
4706	X2JFR6	X2JFR6	Eukaryotic translation initiation factor 2 subunit 1	eIF-2alpha	Dorsal + Lateral (6)	S	326
4795	X2JC55	X2JC55	Phosphatidate cytidylyltransferase;Phosphatidate cytidylyltransferase, photoreceptor-specific	CdsA	Dorsal + Lateral (6)	S	35
4875	Q05913	Q05913	General transcription factor IIF subunit 1	TfIIFalpha	Dorsal + Lateral (6)	S	342
4977	Q23973	Q23973	Protein matrimony	mtrm	Dorsal + Lateral (6)	S	52
5034	Q24371	Q24371	Protein lethal(2)denticleless	l(2)dtl	Dorsal + Lateral (6)	S	459
5127	Q27896	Q27896	TBP-related factor	Trf	Dorsal + Lateral (6)	S	59
5168	Q32KD2	Q32KD2	Histone-lysine N-methyltransferase eggless	egg	Dorsal + Lateral (6)	S	342
5292	Q6IHY4	Q6IHY4			Dorsal + Lateral (6)	S	33
5424	Q7JZN0	Q7JZN0		Sec61beta	Dorsal + Lateral (6)	S	28
5653	Q7KMI3	Q7KMI3		BcDNA.LD23371	Dorsal + Lateral (6)	S	316
5739	Q9VBI4	Q9VBI4		Exo84	Dorsal + Lateral (6)	S	261
5762	Q7KSP6	Q7KSP6		Sbf	Dorsal + Lateral (6)	S	1560
6028	Q9VLL3	Q9VLL3		Akap200	Dorsal + Lateral (6)	S	435
6167	Q8INM3	Q8INM3	Protein slender lobes;Slender lobes-like protein	sle;CG12592	Dorsal + Lateral (6)	S	833
6331	Q8IR33	Q8IR33			Dorsal + Lateral (6)	S	59
6404	Q8MLQ5	Q8MLQ5		kcc	Dorsal + Lateral (6)	S	47
6457	Q8MRI4	Q8MRI4			Dorsal + Lateral (6)	S	278
6570	Q8SY19	Q8SY19		Mgstl	Dorsal + Lateral (6)	S	54
6734	Q9W1N1	Q9W1N1		pita	Dorsal + Lateral (6)	S	155
6854	Q9GYU8	Q9GYU8	Nuclear pore complex protein Nup88	mbo	Dorsal + Lateral (6)	S	503
6942	Q9V3E9	Q9V3E9		spag	Dorsal + Lateral (6)	S	45
7299	Q9VAN8	Q9VAN8		CG11882-RA	Dorsal + Lateral (6)	S	180
7415	Q9VBU7	Q9VBU7		Nup358	Dorsal + Lateral (6)	S	2318
7440	Q9VBU7	Q9VBU7		Nup358	Dorsal + Lateral (6)	S	1259
7572	Q9VC64	Q9VC64		ana1	Dorsal + Lateral (6)	S	318
7751	Q9VDE5	Q9VDE5	Protein Peter pan	ppan	Dorsal + Lateral (6)	S	239
7922	Q9VFT4	Q9VFT4		rin	Dorsal + Lateral (6)	S	470
7990	Q9VGI8	Q9VGI8	Bloom syndrome protein homolog	Blm	Dorsal + Lateral (6)	S	467
8013	Q9VGL0	Q9VGL0			Dorsal + Lateral (6)	S	163
8106	Q9VHJ3	Q9VHJ3		E(var)3-9	Dorsal + Lateral (6)	S	494
8205	Q9VID9	Q9VID9			Dorsal + Lateral (6)	S	1940
8466	Q9VKK1	Q9VKK1	Enhancer of mRNA-decapping protein 4 homolog	Ge-1	Dorsal + Lateral (6)	S	554
8657	Q9VME5	Q9VME5		slam	Dorsal + Lateral (6)	S	740
9126	Q9VRM6	Q9VRM6		l(3)psg2	Dorsal + Lateral (6)	S	1282
9129	Q9VRN3	Q9VRN3		Eaf6	Dorsal + Lateral (6)	S	135
9229	Q9VSW7	Q9VSW7			Dorsal + Lateral (6)	S	349
9322	Q9VTL5	Q9VTL5	Serine/threonine-protein kinase RIO1	RIOK1	Dorsal + Lateral (6)	S	546
9440	Q9VU88	Q9VU88		Liprin-beta	Dorsal + Lateral (6)	S	210
9519	Q9VUQ9	Q9VUQ9		dop	Dorsal + Lateral (6)	S	158
9769	X2JFQ1	X2JFQ1			Dorsal + Lateral (6)	S	205
9860	Q9VX95	Q9VX95		wus	Dorsal + Lateral (6)	S	8
9939	Q9VXU8	Q9VXU8		Grip128	Dorsal + Lateral (6)	S	37
9956	Q9VXZ8	Q9VXZ8		pdgy	Dorsal + Lateral (6)	S	45
9997	Q9VYA4	Q9VYA4			Dorsal + Lateral (6)	S	295
10083	Q9VYW4	Q9VYW4			Dorsal + Lateral (6)	S	102
10250	Q9W0G4	Q9W0G4		l(3)02640	Dorsal + Lateral (6)	S	327
10372	Q9W1K4	Q9W1K4		egl	Dorsal + Lateral (6)	S	996
10529	Q9W335	Q9W335		l(1)G0320	Dorsal + Lateral (6)	S	263
10655	X2JE07	X2JE07		CG1677-RA	Dorsal + Lateral (6)	S	821
10747	Q9W437	Q9W437		raptor	Dorsal + Lateral (6)	S	1384
10773	Q9W4C3	Q9W4C3	Ubiquitin carboxyl-terminal hydrolase	Usp16-45	Dorsal + Lateral (6)	S	31
10860	Q9W542	Q9W542		mip130	Dorsal + Lateral (6)	S	791
10971	Q9XZ21	Q9XZ21		snama	Dorsal + Lateral (6)	S	1205
11060	Q9Y114	Q9Y114		BcDNA.GH10229	Dorsal + Lateral (6)	S	219
11261	X2JEN2	X2JEN2	Inositol hexakisphosphate and diphosphoinositol-pentakisphosphate kinase	l(1)G0196	Dorsal + Lateral (6)	S	976
11592	A1Z898	A1Z898		Caf1-105	Dorsal + Lateral (6)	T	604
11856	Q8IRC1	Q8IRC1		ens	Dorsal + Lateral (6)	T	269
11873	L0MLQ9	L0MLQ9		4E-T	Dorsal + Lateral (6)	T	932
12119	Q7KW02	Q7KW02		east	Dorsal + Lateral (6)	T	852
12320	Q27896	Q27896	TBP-related factor	Trf	Dorsal + Lateral (6)	T	57
12403	Q7K2X8	Q7K2X8		Nup44A	Dorsal + Lateral (6)	T	328
12637	Q960D3	Q960D3		vig2	Dorsal + Lateral (6)	T	189
12799	Q9VCH1	Q9VCH1		eIF4G2	Dorsal + Lateral (6)	T	1081
12875	Q9VGW7	Q9VGW7		Art1	Dorsal + Lateral (6)	T	39
12992	Q9VM69	Q9VM69		nop5	Dorsal + Lateral (6)	T	499
13119	Q9VRP5	Q9VRP5	Ubiquitin carboxyl-terminal hydrolase 36	scny	Dorsal + Lateral (6)	T	658
13124	Q9VRV1	Q9VRV1			Dorsal + Lateral (6)	T	548
13219	Q9VWD0	Q9VWD0		parvin	Dorsal + Lateral (6)	T	12
13458	Q9XZ21	Q9XZ21		snama	Dorsal + Lateral (6)	T	748
13563	P91634	P91634		Pi3K92E	Dorsal + Lateral (6)	Y	138
13475	Q9Y113	Q9Y113	Negative elongation factor B	NELF-B	Dorsal + Lateral (6)	T	567
13346	Q9W1H5	Q9W1H5		DCP1	Dorsal + Lateral (6)	T	223
13170	Q9VU88	Q9VU88		Liprin-beta	Dorsal + Lateral (6)	T	213
13120	Q9VRP5	Q9VRP5	Ubiquitin carboxyl-terminal hydrolase 36	scny	Dorsal + Lateral (6)	T	662
13113	Q9VRM6	Q9VRM6		l(3)psg2	Dorsal + Lateral (6)	T	1284
12912	Q9VID9	Q9VID9			Dorsal + Lateral (6)	T	1954
12836	Q9VDY1	Q9VDY1	Putative DNA helicase Ino80	Ino80	Dorsal + Lateral (6)	T	52
12692	Q9V3V9	Q9V3V9		EndoGI	Dorsal + Lateral (6)	T	193
12501	Q86BS3	Q86BS3		Chro	Dorsal + Lateral (6)	T	377
12359	Q7JQU9	Q7JQU9			Dorsal + Lateral (6)	T	338
12204	P35600	P35600	Replication factor C subunit 1	Gnf1	Dorsal + Lateral (6)	T	71
11937	M9NE89	M9NE89	Lamin Dm0	Lam	Dorsal + Lateral (6)	T	435
11859	F6J1D0	F6J1D0	Myosin regulatory light chain sqh	sqh	Dorsal + Lateral (6)	T	21
11708	B7YZQ1	B7YZQ1		slik	Dorsal + Lateral (6)	T	657
11487	A0A0B4KHP8	A0A0B4KHP8	Uncharacterized protein CG4449	CG4449-RA;CG4449	Dorsal + Lateral (6)	T	91
11071	Q9Y118	Q9Y118		Pol32	Dorsal + Lateral (6)	S	298
11059	Q9Y114	Q9Y114		BcDNA.GH10229	Dorsal + Lateral (6)	S	174
10941	Q9XZ06	Q9XZ06		Nup93-1	Dorsal + Lateral (6)	S	31
10855	Q9W541	Q9W541		eIF2B-epsilon	Dorsal + Lateral (6)	S	451
10756	Q9W464	Q9W464		GAA1	Dorsal + Lateral (6)	S	664
10722	Q9W423	Q9W423		schlank	Dorsal + Lateral (6)	S	370
10594	Q9W3D2	Q9W3D2		Crag	Dorsal + Lateral (6)	S	1523
10504	Q9W2U7	Q9W2U7		nocte	Dorsal + Lateral (6)	S	2093
10294	Q9W147	Q9W147		Fcp1	Dorsal + Lateral (6)	S	487
10086	Q9VYX1	Q9VYX1	Enhancer of yellow 2 transcription factor	e(y)2	Dorsal + Lateral (6)	S	53
10081	Q9VYW4	Q9VYW4			Dorsal + Lateral (6)	S	144
9985	Q9VY97	Q9VY97		mus101	Dorsal + Lateral (6)	S	363
9943	Q9VXW2	Q9VXW2			Dorsal + Lateral (6)	S	174
9889	X2JKP3	X2JKP3		CG9947-RA	Dorsal + Lateral (6)	S	2
9828	Q9VWV2	Q9VWV2		CG32549-RF	Dorsal + Lateral (6)	S	4
9768	X2JFQ1	X2JFQ1			Dorsal + Lateral (6)	S	203
9460	Q9VUB8	Q9VUB8		endos	Dorsal + Lateral (6)	S	68
9417	Q9VU43	Q9VU43		SRm160	Dorsal + Lateral (6)	S	667
9256	Q9VT61	Q9VT61			Dorsal + Lateral (6)	S	374
9196	Q9VSC5	Q9VSC5			Dorsal + Lateral (6)	S	246
9127	Q9VRM6	Q9VRM6		l(3)psg2	Dorsal + Lateral (6)	S	1286
8661	Q9VME5	Q9VME5		slam	Dorsal + Lateral (6)	S	228
8563	Q9VLD6	Q9VLD6	Borealin	borr	Dorsal + Lateral (6)	S	205
8206	Q9VID9	Q9VID9			Dorsal + Lateral (6)	S	1941
8183	Q9VID9	Q9VID9			Dorsal + Lateral (6)	S	1920
8085	Q9VHC8	Q9VHC8			Dorsal + Lateral (6)	S	62
8004	Q9VGJ9	Q9VGJ9		Ho	Dorsal + Lateral (6)	S	191
7937	Q9VG01	Q9VG01			Dorsal + Lateral (6)	S	12
7826	Q9VEA5	Q9VEA5	DNA-directed RNA polymerase II 16 kDa polypeptide	Rpb4	Dorsal + Lateral (6)	S	47
7669	Q9VCK0	Q9VCK0	Eukaryotic translation initiation factor 3 subunit D-1	eIF-3p66	Dorsal + Lateral (6)	S	353
7533	Q9VC60	Q9VC60			Dorsal + Lateral (6)	S	427
7435	Q9VBU7	Q9VBU7		Nup358	Dorsal + Lateral (6)	S	2276
7400	Q9VBN5	Q9VBN5	60S ribosomal protein L27	RpL27	Dorsal + Lateral (6)	S	91
7156	Q9V4P1	Q9V4P1	Actin-binding protein anillin	scra	Dorsal + Lateral (6)	S	80
6878	Q9I7T7	Q9I7T7	La-related protein CG11505	CG11505	Dorsal + Lateral (6)	S	1370
6844	Q9GQR5	Q9GQR5		stai	Dorsal + Lateral (6)	S	67
6661	Q94546	Q94546	Another transcription unit protein	Atu	Dorsal + Lateral (6)	S	672
6458	Q8MRI4	Q8MRI4			Dorsal + Lateral (6)	S	281
6454	Q8MRI4	Q8MRI4			Dorsal + Lateral (6)	S	325
6400	Q8IRW8	Q8IRW8	Histone-lysine N-methyltransferase trr	trr	Dorsal + Lateral (6)	S	1490
6265	Q8IQ71	Q8IQ71		dikar	Dorsal + Lateral (6)	S	1104
6042	Q86BS3	Q86BS3		Chro	Dorsal + Lateral (6)	S	379
5831	Q7KU82	Q7KU82		smid	Dorsal + Lateral (6)	S	501
5742	Q7KSB7	Q7KSB7		Pk92B	Dorsal + Lateral (6)	S	923
5719	Q8IMG3	Q8IMG3			Dorsal + Lateral (6)	S	300
5525	Q7K3D4	Q7K3D4			Dorsal + Lateral (6)	S	241
5415	Q7JZ37	Q7JZ37			Dorsal + Lateral (6)	S	19
5282	Q5U0X8	Q5U0X8			Dorsal + Lateral (6)	S	915
5152	Q29QE1;X2JC00	Q29QE1		RhoGAP1A	Dorsal + Lateral (6)	S	454
5075	Q24572	Q24572	Probable histone-binding protein Caf1	Caf1	Dorsal + Lateral (6)	S	11
5006	Q24185	Q24185	Protein hook	hk	Dorsal + Lateral (6)	S	610
4911	Q0E8J0	Q0E8J0		MEP-1	Dorsal + Lateral (6)	S	24
4809	P83094	P83094	Stromal interaction molecule homolog	Stim	Dorsal + Lateral (6)	S	546
4756	P49906	P49906	Transcription initiation factor TFIID subunit 11	Taf11	Dorsal + Lateral (6)	S	67
4559	P23128	P23128	Putative ATP-dependent RNA helicase me31b	me31B	Dorsal + Lateral (6)	S	445
4493	P15348	P15348	DNA topoisomerase 2	Top2	Dorsal + Lateral (6)	S	9
4405	P05084	P05084	Protein hunchback	hb	Dorsal + Lateral (6)	S	522
4346	X2JC82	X2JC82	Heat shock protein 27	Hsp27	Dorsal + Lateral (6)	S	75
4328	O97132	O97132	Anoctamin	Axs	Dorsal + Lateral (6)	S	26
4272	O61305	O61305	DEAD-box helicase Dbp80	Dbp80	Dorsal + Lateral (6)	S	41
4230	O46043	O46043	Poly(ADP-ribose) glycohydrolase	Parg	Dorsal + Lateral (6)	S	579
3917	M9PFZ1	M9PFZ1		Nopp140	Dorsal + Lateral (6)	S	632
3812	M9PF85	M9PF85		Rcd-1	Dorsal + Lateral (6)	S	6
3789	M9PEU5	M9PEU5	Nedd8-activating enzyme E1 regulatory subunit	APP-BP1	Dorsal + Lateral (6)	S	3
3460	M9NG39	M9NG39	Zinc finger protein on ecdysone puffs	Pep	Dorsal + Lateral (6)	S	663
3393	M9NF67	M9NF67	Nibrin	nbs	Dorsal + Lateral (6)	S	561
3358	M9NEL1	M9NEL1	Serine/threonine-protein phosphatase;Serine/threonine-protein phosphatase 2B catalytic subunit 3	CanA-14F	Dorsal + Lateral (6)	S	73
3267	M9NDA1	M9NDA1		Mbs	Dorsal + Lateral (6)	S	1084
3118	M9MS15	M9MS15	Neurotactin	Nrt	Dorsal + Lateral (6)	S	263
3004	M9MQH9	M9MQH9	Serine/threonine-protein phosphatase PP2A 65 kDa regulatory subunit	Pp2A-29B	Dorsal + Lateral (6)	S	11
2963	M9NDX8	M9NDX8		Spn	Dorsal + Lateral (6)	S	1852
2870	Q9VQ76	Q9VQ76		tho2	Dorsal + Lateral (6)	S	1284
2700	E1JIB9;X2JG79	E1JIB9			Dorsal + Lateral (6)	S	483
2680	M9PIA6	M9PIA6	Chromodomain-helicase-DNA-binding protein Mi-2 homolog	Mi-2	Dorsal + Lateral (6)	S	560
2567	D3PFH9	D3PFH9	Protein phosphatase Slingshot	ssh	Dorsal + Lateral (6)	S	605
2442	B7Z0I8	B7Z0I8			Dorsal + Lateral (6)	S	2017
2326	B7Z098	B7Z098	Eukaryotic translation initiation factor 2A	CG7414	Dorsal + Lateral (6)	S	608
1946	A8DYB0	A8DYB0			Dorsal + Lateral (6)	S	692
1876	A4V2K7	A4V2K7	Chromosomal protein D1	D1	Dorsal + Lateral (6)	S	307
1601	A1Z987	A1Z987		Cap-G	Dorsal + Lateral (6)	S	516
1400	A0A126BEE6	A0A126BEE6	Protein NASP homolog	CG8223	Dorsal + Lateral (6)	S	17
1326	A0A0B4LJ12	A0A0B4LJ12	Nucleoside diphosphate kinase	awd	Dorsal + Lateral (6)	S	121
1223	A0A0B4LGB7	A0A0B4LGB7	Calcium-transporting ATPase;Calcium-transporting ATPase sarcoplasmic/endoplasmic reticulum type	Ca-P60A	Dorsal + Lateral (6)	S	240
1176	A0A0B4LFQ2	A0A0B4LFQ2		Incenp	Dorsal + Lateral (6)	S	442
1149	A0A0B4LFJ4	A0A0B4LFJ4	Transmembrane protein 131 homolog	CG8370	Dorsal + Lateral (6)	S	1330
983	Q9V9X8	Q9V9X8		Gcn2	Dorsal + Lateral (6)	S	612
956	A0A0B4KHP8	A0A0B4KHP8	Uncharacterized protein CG4449	CG4449-RA;CG4449	Dorsal + Lateral (6)	S	32
941	A0A0B4KHJ5	A0A0B4KHJ5	Glycogen [starch] synthase	GlyS	Dorsal + Lateral (6)	S	10
550	A0A0B4KEM3	A0A0B4KEM3		Mlh1	Dorsal + Lateral (6)	S	378
447	A0A0B4K7Z5	A0A0B4K7Z5	26S proteasome non-ATPase regulatory subunit 11	Rpn6	Dorsal + Lateral (6)	S	24
410	A0A0B4K7U3	A0A0B4K7U3	Probable lysine-specific demethylase 4A	Kdm4A	Dorsal + Lateral (6)	S	371
278	A0A0B4KHY2	A0A0B4KHY2	Protein lap4	scrib	Dorsal + Lateral (6)	S	702
219	A0A0B4K6B8	A0A0B4K6B8	Modifier of mdg4	mod(mdg4)	Dorsal + Lateral (6)	S	292
68	A0A0B4JCV4	A0A0B4JCV4		tacc	Dorsal + Lateral (6)	S	940
63	A0A0B4JCV4	A0A0B4JCV4		tacc	Dorsal + Lateral (6)	S	252
19	A0A023GQ99	A0A023GQ99	H/ACA ribonucleoprotein complex non-core subunit NAF1	CG10341	Dorsal + Lateral (6)	S	428
4539	P21187	P21187	Polyadenylate-binding protein	pAbp	Dorsal + Lateral (6)	S	87
3304	M9NDR2	M9NDR2	Protein bicaudal D	BicD	Dorsal + Lateral (6)	S	109
12040	M9PFZ1;Q7KTV5	Q7KTV5		Nopp140	Dorsal + Lateral (6)	T	403
11720	B7YZZ9	B7YZZ9	Recombination repair protein 1	Rrp1	Dorsal + Lateral (6)	T	140
10805	Q9W4M7	Q9W4M7		tyf	Dorsal + Lateral (6)	S	889
10214	Q9W032	Q9W032	Protein SGT1 homolog ecdysoneless	ecd	Dorsal + Lateral (6)	S	496
6545	Q8SX89	Q8SX89		kuk	Dorsal + Lateral (6)	S	296
6392	Q8IRH5	Q8IRH5	Zinc finger protein CG2199	CG2199	Dorsal + Lateral (6)	S	440
5560	Q7K4C7	Q7K4C7		Cct1	Dorsal + Lateral (6)	S	143
746	A0A0B4KGP0	A0A0B4KGP0		stumps	Dorsal + Lateral (6)	S	543
412	A0A0B4K7U3	A0A0B4K7U3	Probable lysine-specific demethylase 4A	Kdm4A	Dorsal + Lateral (6)	S	394
1139	A0A0B4LFE1	A0A0B4LFE1			Dorsal + Ventral Tl10B (7)	S	85
13319	Q9VZY0	Q9VZY0		Non2	Dorsal + Ventral Tl10B (7)	T	131
8651	Q9VME5	Q9VME5		slam	Dorsal + Ventral Tl10B (7)	S	190
6554	Q8SXI2	Q8SXI2		Yeti	Dorsal + Ventral Tl10B (7)	S	39
4210	O18332	O18332		Rab1	Dorsal + Ventral Tl10B (7)	S	187
4072	M9PHN1	M9PHN1		dah	Dorsal + Ventral Tl10B (7)	S	388
3989	M9PGW8	M9PGW8		bif	Dorsal + Ventral Tl10B (7)	S	525
4173	O02193	O02193	Males-absent on the first protein	mof	Dorsal + Ventral Tl10B (7)	S	122
1795	A1ZBW7	A1ZBW7	WASH complex subunit FAM21 homolog	CG16742	Dorsal + Ventral Tl10B (7)	S	1175
12979	Q9VL89	Q9VL89	Methionine aminopeptidase 2	und	Dorsal + Ventral Tl10B (7)	T	4
10707	Q9W3Z4	Q9W3Z4			Dorsal + Ventral Tl10B (7)	S	334
2189	B7YZV0	B7YZV0		CG31869-RB	Dorsal + Ventral Tl10B (7)	S	500
5156	Q2PDP6	Q2PDP6		CG12877-RC	Dorsal + Ventral Tl10B (7)	S	90
6074	Q8I0A1;Q8SXT8;Q9VDD2	Q9VDD2		SNF4Agamma	Dorsal + Ventral Tl10B (7)	S	1272
6426	Q8MMD2	Q8MMD2		Eps-15	Dorsal + Ventral Tl10B (7)	S	988
8418	Q9VK59	Q9VK59			Dorsal + Ventral Tl10B (7)	S	771
8554	Q9VL89	Q9VL89	Methionine aminopeptidase 2	und	Dorsal + Ventral Tl10B (7)	S	2
8627	X2J786	X2J786	Transport and Golgi organization protein 1	Tango1	Dorsal + Ventral Tl10B (7)	S	865
8923	Q9VPL5	Q9VPL5		Tbc1d15-17	Dorsal + Ventral Tl10B (7)	S	307
9288	Q9VTC1	Q9VTC1			Dorsal + Ventral Tl10B (7)	S	130
8662	Q9VME5	Q9VME5		slam	Dorsal + Ventral Tl10B (7)	S	102
8041	Q9VH76	Q9VH76	Synaptosomal-associated protein;Synaptosomal-associated protein 25	Snap24;Snap25	Dorsal + Ventral Tl10B (7)	S	81
7874	Q9VEV3	Q9VEV3			Dorsal + Ventral Tl10B (7)	S	83
7718	Q9VD81	Q9VD81	DNA-directed RNA polymerase subunit	RpI12	Dorsal + Ventral Tl10B (7)	S	70
7487	Q9VC36	Q9VC36		polybromo	Dorsal + Ventral Tl10B (7)	S	326
7219	Q9V9U3	Q9V9U3			Dorsal + Ventral Tl10B (7)	S	392
7180	Q9V677	Q9V677	Proteasome-associated protein ECM29 homolog	CG8858	Dorsal + Ventral Tl10B (7)	S	1692
6940	Q9V3E7	Q9V3E7		Ref1	Dorsal + Ventral Tl10B (7)	S	55
6825	Q961G1	Q961G1	Conserved oligomeric Golgi complex subunit 3	Cog3	Dorsal + Ventral Tl10B (7)	S	844
6770	Q960D3	Q960D3		vig2	Dorsal + Ventral Tl10B (7)	S	203
9179	Q9VS50	Q9VS50	N-acetyltransferase eco	eco	Dorsal + Ventral Tl10B (7)	S	314
6349	Q8IRB5	Q8IRB5	Claspin homolog	CG32251	Dorsal + Ventral Tl10B (7)	S	373
6262	Q8IPZ5	Q8IPZ5			Dorsal + Ventral Tl10B (7)	S	89
6179	Q8INM3	Q8INM3	Protein slender lobes	sle	Dorsal + Ventral Tl10B (7)	S	312
5923	Q7PLL6	Q7PLL6			Dorsal + Ventral Tl10B (7)	S	2614
5306	Q6NQZ5	Q6NQZ5		sced	Dorsal + Ventral Tl10B (7)	S	302
5298	Q6NQY9	Q6NQY9			Dorsal + Ventral Tl10B (7)	S	177
5215	Q4V6F7	Q4V6F7			Dorsal + Ventral Tl10B (7)	S	134
5162	Q2PE14	Q2PE14	Zinc finger CCHC domain-containing protein 8 homolog	CG4622	Dorsal + Ventral Tl10B (7)	S	292
5096	Q24574	Q24574	Ubiquitin carboxyl-terminal hydrolase 64E	Ubp64E	Dorsal + Ventral Tl10B (7)	S	244
5095	Q24574	Q24574	Ubiquitin carboxyl-terminal hydrolase 64E	Ubp64E	Dorsal + Ventral Tl10B (7)	S	238
5052	Q24478	Q24478	Centrosome-associated zinc finger protein CP190	Cp190	Dorsal + Ventral Tl10B (7)	S	211
4960	Q0KHZ9	Q0KHZ9		Cnx99A	Dorsal + Ventral Tl10B (7)	S	553
4948	Q0KHR4	Q0KHR4		mei-218	Dorsal + Ventral Tl10B (7)	S	229
4925	Q0E8X6	Q0E8X6		eIF2B-delta	Dorsal + Ventral Tl10B (7)	S	219
4898	Q0E8J0	Q0E8J0		MEP-1	Dorsal + Ventral Tl10B (7)	S	248
9212	Q9VSK2	Q9VSK2		Cbl	Dorsal + Ventral Tl10B (7)	S	646
4188	O16043	O16043		Df31	Dorsal + Ventral Tl10B (7)	S	130
9433	Q9VU84	Q9VU84	Drebrin-like protein	Abp1	Dorsal + Ventral Tl10B (7)	S	242
4152	N0D8I3	N0D8I3	Transcription elongation factor SPT6	Spt6	Dorsal + Ventral Tl10B (7)	S	12
9843	Q9VX34	Q9VX34			Dorsal + Ventral Tl10B (7)	S	580
3995	M9PGW8	M9PGW8		bif	Dorsal + Ventral Tl10B (7)	S	846
10005	X2JEW2	X2JEW2	RRP12-like protein	CG2691	Dorsal + Ventral Tl10B (7)	S	1094
3539	Q9VIV0	Q9VIV0			Dorsal + Ventral Tl10B (7)	S	186
3505	M9PB68	M9PB68	Protein purity of essence	poe	Dorsal + Ventral Tl10B (7)	S	167
3306	M9NDR2	M9NDR2	Protein bicaudal D	BicD	Dorsal + Ventral Tl10B (7)	S	310
3251	M9ND37	M9ND37		eIF5B	Dorsal + Ventral Tl10B (7)	S	464
3245	M9ND37	M9ND37		eIF5B	Dorsal + Ventral Tl10B (7)	S	76
3231	M9NCX1	M9NCX1	Lethal(2) giant larvae protein	l(2)gl	Dorsal + Ventral Tl10B (7)	S	984
3205	M9NCM6	M9NCM6	Protein split ends	spen	Dorsal + Ventral Tl10B (7)	S	2575
2979	M9NDX8	M9NDX8		Spn	Dorsal + Ventral Tl10B (7)	S	701
2971	M9NDX8	M9NDX8		Spn	Dorsal + Ventral Tl10B (7)	S	310
2970	M9NDX8	M9NDX8		Spn	Dorsal + Ventral Tl10B (7)	S	306
2814	Q9VWI1	Q9VWI1		pcm	Dorsal + Ventral Tl10B (7)	S	1519
2770	E1JJF4	E1JJF4	Neuropathy target esterase sws	sws	Dorsal + Ventral Tl10B (7)	S	1417
2433	B7Z0I8	B7Z0I8			Dorsal + Ventral Tl10B (7)	S	1147
2387	B7Z0I8	B7Z0I8			Dorsal + Ventral Tl10B (7)	S	3125
2371	B7Z0I8	B7Z0I8			Dorsal + Ventral Tl10B (7)	S	180
2293	B7Z002	B7Z002		kis	Dorsal + Ventral Tl10B (7)	S	3852
2265	B7Z002	B7Z002		kis	Dorsal + Ventral Tl10B (7)	S	1370
2239	B7Z002	B7Z002		kis	Dorsal + Ventral Tl10B (7)	S	1569
2186	Q0E8W0	Q0E8W0	Neuropeptide-like 1;MTYamide peptide;IPNamide peptide;NAP peptide;NPLP1-1;NPLP1-2;NPLP1-3;NPLP1-4;NPLP1-5;NPLP1-6	Nplp1	Dorsal + Ventral Tl10B (7)	S	215
2162	B5RJS0	B5RJS0		CG4040-RA	Dorsal + Ventral Tl10B (7)	S	550
2060	B7Z0G0	B7Z0G0	Nuclear distribution protein nudE homolog	nudE	Dorsal + Ventral Tl10B (7)	S	129
1672	Q8IFW6	Q8IFW6		Dek	Dorsal + Ventral Tl10B (7)	S	20
1574	A1Z909	A1Z909		CG8545-RA	Dorsal + Ventral Tl10B (7)	S	796
1294	A0A0B4LH25	A0A0B4LH25			Dorsal + Ventral Tl10B (7)	S	1027
1152	A0A0B4LFJ4	A0A0B4LFJ4	Transmembrane protein 131 homolog	CG8370	Dorsal + Ventral Tl10B (7)	S	1250
10082	Q9VYW4	Q9VYW4			Dorsal + Ventral Tl10B (7)	S	93
1102	A0A0B4LFF9	A0A0B4LFF9		Inr-a	Dorsal + Ventral Tl10B (7)	S	1488
499	A0A0B4K8A7	A0A0B4K8A7			Dorsal + Ventral Tl10B (7)	S	274
498	A0A0B4K8A7	A0A0B4K8A7			Dorsal + Ventral Tl10B (7)	S	272
328	A0A0B4KHR8	A0A0B4KHR8	Ankyrin repeat and KH domain-containing protein mask	mask	Dorsal + Ventral Tl10B (7)	S	3289
257	A0A0B4K6I2	A0A0B4K6I2			Dorsal + Ventral Tl10B (7)	S	43
256	A0A0B4K6I2	A0A0B4K6I2			Dorsal + Ventral Tl10B (7)	S	38
215	O46342	O46342		rpk	Dorsal + Ventral Tl10B (7)	S	11
110	A0A0B4JD33	A0A0B4JD33		Su(var)2-10	Dorsal + Ventral Tl10B (7)	S	576
10202	Q9VZY0	Q9VZY0		Non2	Dorsal + Ventral Tl10B (7)	S	133
10345	Q9W1H4	Q9W1H4	DNA ligase 1	DNA-ligI	Dorsal + Ventral Tl10B (7)	S	42
10725	Q9W425	Q9W425		Rbcn-3A	Dorsal + Ventral Tl10B (7)	S	680
12282	Q24154	Q24154	60S ribosomal protein L29	RpL29	Dorsal + Ventral Tl10B (7)	T	32
12547	Q8INM3	Q8INM3	Protein slender lobes	sle	Dorsal + Ventral Tl10B (7)	T	330
13186	Q9VUM0	Q9VUM0	Probable DNA mismatch repair protein Msh6	Msh6	Dorsal + Ventral Tl10B (7)	T	104
13215	Q9VW40	Q9VW40			Dorsal + Ventral Tl10B (7)	T	73
13290	Q9VYV4	Q9VYV4		Amun	Dorsal + Ventral Tl10B (7)	T	287
13204	Q9VVG9	Q9VVG9			Dorsal + Ventral Tl10B (7)	T	484
12894	Q9VHJ3	Q9VHJ3		E(var)3-9	Dorsal + Ventral Tl10B (7)	T	504
12462	Q7KU82	Q7KU82		smid	Dorsal + Ventral Tl10B (7)	T	459
12137	O77430	O77430		SkpA	Dorsal + Ventral Tl10B (7)	T	130
10347	Q9W1H4	Q9W1H4	DNA ligase 1	DNA-ligI	Dorsal + Ventral Tl10B (7)	S	46
10281	Q9W0X8	Q9W0X8		BcDNA:GH03108	Dorsal + Ventral Tl10B (7)	S	433
1	Q8SYH8	Q8SYH8		CG17159	Dorsal + Ventral Tl10B (7)	S	176
8427	Q9VKC5	Q9VKC5		CG6770-RA	Dorsal + Ventral Tl10B (7)	S	2
8738	Q9VN82	Q9VN82		cno	Dorsal + Ventral Tl10B (7)	S	1186
7179	Q9V677	Q9V677	Proteasome-associated protein ECM29 homolog	CG8858	Dorsal + Ventral Tl10B (7)	S	1683
6260	Q8IPW2	Q8IPW2		dock	Dorsal + Ventral Tl10B (7)	S	94
8739	Q9VN82	Q9VN82		cno	Dorsal + Ventral Tl10B (7)	S	1196
9897	Q9VXG1	Q9VXG1	Zinc finger protein hangover	hang	Dorsal + Ventral Tl10B (7)	S	689
4682	P39205	P39205	Molybdenum cofactor synthesis protein cinnamon;Molybdopterin adenylyltransferase;Molybdopterin molybdenumtransferase	cin	Dorsal + Ventral Tl10B (7)	S	173
1510	A1Z768	A1Z768		rnh1	Dorsal + Ventral spn27A (8)	S	139
12155	X2JEX8	X2JEX8	Vitellogenin-3	Yp3	Dorsal + Ventral spn27A (8)	T	176
13471	Q9Y095	Q9Y095		XRCC1	Dorsal + Ventral spn27A (8)	T	399
8734	Q9VN82	Q9VN82		cno	Dorsal + Ventral spn27A (8)	S	497
3489	M9PB57	M9PB57	Wee1-like protein kinase	Wee1;wee	Dorsal + Ventral spn27A (8)	S	52
6505	Q8ST61	Q8ST61		Nf-YB	Dorsal + Ventral spn27A (8)	S	23
7148	Q9V4F9	Q9V4F9	Mediator of RNA polymerase II transcription subunit 26	MED26	Dorsal + Ventral spn27A (8)	S	373
7164	Q9V4P1	Q9V4P1	Actin-binding protein anillin	scra	Dorsal + Ventral spn27A (8)	S	56
7217	Q9V9U3	Q9V9U3			Dorsal + Ventral spn27A (8)	S	97
7453	Q9VBX1	Q9VBX1	Nuclear export mediator factor NEMF homolog	Clbn	Dorsal + Ventral spn27A (8)	S	738
8366	Q9VJQ4	Q9VJQ4	mRNA cap guanine-N7 methyltransferase	l(2)35Bd	Dorsal + Ventral spn27A (8)	S	46
8616	X2J9P9	X2J9P9	Protein cup	cup	Dorsal + Ventral spn27A (8)	S	144
41	A0A0B4JD24	A0A0B4JD24			Dorsal + Ventral spn27A (8)	S	157
13371	Q9W2U7	Q9W2U7		nocte	Dorsal + Ventral spn27A (8)	T	1240
13454	Q9W5E4	Q9W5E4		l(1)1Bi	Dorsal + Ventral spn27A (8)	T	1133
13393	Q9W3D1	Q9W3D1		Caf1-180	Dorsal + Ventral spn27A (8)	T	107
13117	Q9VRN3	Q9VRN3		Eaf6	Dorsal + Ventral spn27A (8)	T	195
42	A0A0B4JD24	A0A0B4JD24			Dorsal + Ventral spn27A (8)	S	159
381	A1Z8W9	A1Z8W9		garz	Dorsal + Ventral spn27A (8)	S	1261
506	A0A0B4KEE7	A0A0B4KEE7			Dorsal + Ventral spn27A (8)	S	727
563	Q95RL2	Q95RL2		row	Dorsal + Ventral spn27A (8)	S	90
596	A0A0B4KEY6;A0A0B4KFA4	A0A0B4KFA4	Patronin	Patronin	Dorsal + Ventral spn27A (8)	S	497
623	Q9VNC4	Q9VNC4			Dorsal + Ventral spn27A (8)	S	674
729	A0A126GUN5	A0A126GUN5	Uncharacterized protein CG5098	CG5098	Dorsal + Ventral spn27A (8)	S	572
755	Q9VEH1	Q9VEH1		ald	Dorsal + Ventral spn27A (8)	S	78
758	Q9VF92	Q9VF92		ear	Dorsal + Ventral spn27A (8)	S	564
786	A0A0B4KG81	A0A0B4KG81	Protein dopey-1 homolog	CG15099	Dorsal + Ventral spn27A (8)	S	1363
1115	A0A0B4LFF9	A0A0B4LFF9		Inr-a	Dorsal + Ventral spn27A (8)	S	482
1168	A0A0B4LFL3	A0A0B4LFL3	Probable elongation factor 1-beta	Ef1beta	Dorsal + Ventral spn27A (8)	S	104
1189	A0A0B4LFX0	A0A0B4LFX0	Protein enabled	ena	Dorsal + Ventral spn27A (8)	S	608
1230	A0A0B4LGF9	A0A0B4LGF9	Protein dead ringer	retn	Dorsal + Ventral spn27A (8)	S	735
1243	A0A0B4LGG4	A0A0B4LGG4	Sestrin homolog	Sesn	Dorsal + Ventral spn27A (8)	S	154
1271	A0A0B4LGX0	A0A0B4LGX0		Cenp-C	Dorsal + Ventral spn27A (8)	S	644
1388	A0A0S0X2W5;Q960D3	Q960D3		FDY;vig2	Dorsal + Ventral spn27A (8)	S	264
1477	A1Z6I7	A1Z6I7		BubR1	Dorsal + Ventral spn27A (8)	S	583
1485	A1Z6I7	A1Z6I7		BubR1	Dorsal + Ventral spn27A (8)	S	857
1651	A1Z9S6	A1Z9S6		Su(var)2-HP2	Dorsal + Ventral spn27A (8)	S	2462
1854	A4V1B2	A4V1B2	Patj homolog	Patj	Dorsal + Ventral spn27A (8)	S	128
1895	A4V3G8	A4V3G8	Nucleosomal histone kinase 1	ball	Dorsal + Ventral spn27A (8)	S	564
1915	B7Z0R6	B7Z0R6		Doa	Dorsal + Ventral spn27A (8)	S	89
2012	M9PBL6	M9PBL6		kst	Dorsal + Ventral spn27A (8)	S	4154
2074	M9PGG0	M9PGG0		ArfGAP3	Dorsal + Ventral spn27A (8)	S	3
2266	B7Z002	B7Z002		kis	Dorsal + Ventral spn27A (8)	S	3782
2370	B7Z0I8	B7Z0I8			Dorsal + Ventral spn27A (8)	S	176
2479	Q9VI18	Q9VI18		BcDNA:LD21969	Dorsal + Ventral spn27A (8)	S	322
2562	D3PFH9	D3PFH9	Protein phosphatase Slingshot	ssh	Dorsal + Ventral spn27A (8)	S	165
2585	E1JGX3	E1JGX3	Nipped-B protein	Nipped-B	Dorsal + Ventral spn27A (8)	S	2042
2657	M9PE12	M9PE12	Nucleosome-remodeling factor subunit NURF301	E(bx)	Dorsal + Ventral spn27A (8)	S	1994
2792	Q9VX48	Q9VX48			Dorsal + Ventral spn27A (8)	S	1233
2795	M9PF12	M9PF12		X11L	Dorsal + Ventral spn27A (8)	S	140
2799	E1JJN9	E1JJN9	Histone-lysine N-methyltransferase;Probable histone-lysine N-methyltransferase CG1716	Set2	Dorsal + Ventral spn27A (8)	S	1085
2935	H0RNK7	H0RNK7	RNA polymerase-associated protein Rtf1	Rtf1-RA;Rtf1	Dorsal + Ventral spn27A (8)	S	385
2953	H0RNN8	H0RNN8	Ribosomal L1 domain-containing protein CG13096	CG13096-RA;CG13096	Dorsal + Ventral spn27A (8)	S	15
2954	H0RNN8	H0RNN8	Ribosomal L1 domain-containing protein CG13096	CG13096-RA;CG13096	Dorsal + Ventral spn27A (8)	S	17
2961	M9NDX8	M9NDX8		Spn	Dorsal + Ventral spn27A (8)	S	798
2982	M9NDX8	M9NDX8		Spn	Dorsal + Ventral spn27A (8)	S	325
3065	M9MRD9	M9MRD9		PAPLA1	Dorsal + Ventral spn27A (8)	S	562
3077	M9PCJ7	M9PCJ7		Utx	Dorsal + Ventral spn27A (8)	S	374
3288	M9NDL7	M9NDL7		Reps	Dorsal + Ventral spn27A (8)	S	680
3430	M9NFQ5	M9NFQ5	Protein furry	fry	Dorsal + Ventral spn27A (8)	S	3028
3431	M9NFQ5	M9NFQ5	Protein furry	fry	Dorsal + Ventral spn27A (8)	S	3029
3499	M9PB68	M9PB68	Protein purity of essence	poe	Dorsal + Ventral spn27A (8)	S	4590
3605	M9PC73	M9PC73		Liprin-alpha	Dorsal + Ventral spn27A (8)	S	660
3842	M9PFY1	M9PFY1	Zinc finger protein weckle	wek	Dorsal + Ventral spn27A (8)	S	164
3889	M9PFZ1;Q7KTV5	Q7KTV5		Nopp140	Dorsal + Ventral spn27A (8)	S	560
4006	Q9VYK0	Q9VYK0		Smr	Dorsal + Ventral spn27A (8)	S	2625
4068	M9PHL0	M9PHL0	Supporter of activation of yellow protein	e(y)3	Dorsal + Ventral spn27A (8)	S	964
4138	M9PJN9	M9PJN9		shi	Dorsal + Ventral spn27A (8)	S	639
4206	O17468	O17468	Protein HIRA homolog	Hira	Dorsal + Ventral spn27A (8)	S	895
4207	O17468	O17468	Protein HIRA homolog	Hira	Dorsal + Ventral spn27A (8)	S	898
4253	Q7KW02	Q7KW02		east	Dorsal + Ventral spn27A (8)	S	856
4277	O61604	O61604		Fim	Dorsal + Ventral spn27A (8)	S	12
4318	O96838	O96838	Putative 1-phosphatidylinositol 3-phosphate 5-kinase	fab1	Dorsal + Ventral spn27A (8)	S	1406
4326	O97132	O97132	Anoctamin	Axs	Dorsal + Ventral spn27A (8)	S	2
4374	X2JB25	X2JB25	Vitellogenin-2	Yp2	Dorsal + Ventral spn27A (8)	S	183
4450	P09208	P09208	'Insulin-like receptor;Insulin-like receptor subunit alpha;Insulin-like receptor subunit beta 1;Insulin-like receptor subunit bet...' <Preview truncated at 128 characters>	InR	Dorsal + Ventral spn27A (8)	S	1809
4451	P09208	P09208	'Insulin-like receptor;Insulin-like receptor subunit alpha;Insulin-like receptor subunit beta 1;Insulin-like receptor subunit bet...' <Preview truncated at 128 characters>	InR	Dorsal + Ventral spn27A (8)	S	1816
4471	P13496	P13496	Dynactin subunit 1	Gl	Dorsal + Ventral spn27A (8)	S	370
4472	P13496	P13496	Dynactin subunit 1	Gl	Dorsal + Ventral spn27A (8)	S	375
4523	P20240	P20240	Otefin	Ote	Dorsal + Ventral spn27A (8)	S	321
4884	Q05913	Q05913	General transcription factor IIF subunit 1	TfIIFalpha	Dorsal + Ventral spn27A (8)	S	453
4909	Q0E8J0	Q0E8J0		MEP-1	Dorsal + Ventral spn27A (8)	S	21
4988	Q24113	Q24113		nonA-l	Dorsal + Ventral spn27A (8)	S	114
5151	Q29QE1;X2JC00	Q29QE1		RhoGAP1A	Dorsal + Ventral spn27A (8)	S	450
5167	Q2PE14	Q2PE14	Zinc finger CCHC domain-containing protein 8 homolog	CG4622	Dorsal + Ventral spn27A (8)	S	480
5227	Q59DT1	Q59DT1			Dorsal + Ventral spn27A (8)	S	7
5271	Q5U0V7	Q5U0V7		Synj	Dorsal + Ventral spn27A (8)	S	1090
5412	Q7JZ25	Q7JZ25	Chloride channel protein	ClC-b	Dorsal + Ventral spn27A (8)	S	14
5427	Q7K0D3	Q7K0D3			Dorsal + Ventral spn27A (8)	S	244
5477	Q7K180	Q7K180		Map60	Dorsal + Ventral spn27A (8)	S	241
5496	Q7K264	Q7K264			Dorsal + Ventral spn27A (8)	S	209
5497	Q7K264	Q7K264			Dorsal + Ventral spn27A (8)	S	212
5557	Q7K3Z3	Q7K3Z3		p47	Dorsal + Ventral spn27A (8)	S	286
5627	Q7KLE5	Q7KLE5		Amph	Dorsal + Ventral spn27A (8)	S	259
5632	Q7KM15	Q7KM15	Transcription factor BTF3	bic	Dorsal + Ventral spn27A (8)	S	132
5633	Q7KM15	Q7KM15	Transcription factor BTF3	bic	Dorsal + Ventral spn27A (8)	S	133
5796	Q9VM57	Q9VM57		sip2	Dorsal + Ventral spn27A (8)	S	173
5940	Q7YZ95	Q7YZ95		Skp2	Dorsal + Ventral spn27A (8)	S	163
6027	Q9VLL3	Q9VLL3		Akap200	Dorsal + Ventral spn27A (8)	S	430
6037	Q86BP6	Q86BP6		elg1	Dorsal + Ventral spn27A (8)	S	20
6045	Q86BS3	Q86BS3		Chro	Dorsal + Ventral spn27A (8)	S	389
6056	Q86BS3	Q86BS3		Chro	Dorsal + Ventral spn27A (8)	S	163
6145	Q8INM3	Q8INM3	Protein slender lobes	sle	Dorsal + Ventral spn27A (8)	S	134
6172	Q8INM3	Q8INM3	Protein slender lobes	sle	Dorsal + Ventral spn27A (8)	S	548
6184	Q8INM3	Q8INM3	Protein slender lobes	sle	Dorsal + Ventral spn27A (8)	S	497
6214	Q8INM3	Q8INM3	Protein slender lobes;Slender lobes-like protein	sle;CG12592	Dorsal + Ventral spn27A (8)	S	1055
6224	Q8INM3	Q8INM3	Protein slender lobes	sle	Dorsal + Ventral spn27A (8)	S	1150
6234	Q8INX3	Q8INX3	Protein TIPIN homolog	CG10336	Dorsal + Ventral spn27A (8)	S	47
6237	Q8IP71	Q8IP71	Inhibitor of growth protein	CG9293-RB	Dorsal + Ventral spn27A (8)	S	125
6254	Q9VMX2	Q9VMX2		l(2)05714	Dorsal + Ventral spn27A (8)	S	92
6255	Q9I7P8	Q9I7P8			Dorsal + Ventral spn27A (8)	S	219
6321	Q8IR15	Q8IR15			Dorsal + Ventral spn27A (8)	S	149
6348	Q8IRB5	Q8IRB5	Claspin homolog	CG32251	Dorsal + Ventral spn27A (8)	S	372
6354	Q8IRB5	Q8IRB5	Claspin homolog	CG32251	Dorsal + Ventral spn27A (8)	S	36
6536	Q8SX89	Q8SX89		kuk	Dorsal + Ventral spn27A (8)	S	427
6590	Q8T051	Q8T051			Dorsal + Ventral spn27A (8)	S	423
6742	Q95RR6	Q95RR6		Pur-alpha	Dorsal + Ventral spn27A (8)	S	2
6779	Q960D3	Q960D3		vig2	Dorsal + Ventral spn27A (8)	S	395
6806	Q9I7J4	Q9I7J4			Dorsal + Ventral spn27A (8)	S	219
6873	Q9I7T7	Q9I7T7	La-related protein CG11505	CG11505	Dorsal + Ventral spn27A (8)	S	1408
6945	Q9V3E9	Q9V3E9		spag	Dorsal + Ventral spn27A (8)	S	72
6951	Q9V3E9	Q9V3E9		spag	Dorsal + Ventral spn27A (8)	S	350
6993	X2JF59	X2JF59	Peroxiredoxin 1	Jafrac1	Dorsal + Ventral spn27A (8)	S	194
7049	Q9V3Y4	Q9V3Y4		Mtch	Dorsal + Ventral spn27A (8)	S	120
7065	Q9V406	Q9V406		crp	Dorsal + Ventral spn27A (8)	S	80
7195	Q9V7P1	Q9V7P1	U3 small nucleolar RNA-associated protein 18 homolog	wcd	Dorsal + Ventral spn27A (8)	S	102
7261	Q9VAH7	Q9VAH7		yata	Dorsal + Ventral spn27A (8)	S	765
7295	Q9VAN6	Q9VAN6	Histone RNA hairpin-binding protein	Slbp	Dorsal + Ventral spn27A (8)	S	9
7297	Q9VAN7	Q9VAN7		Pglym78;Pglym87	Dorsal + Ventral spn27A (8)	S	15
7460	Q9VBY6	Q9VBY6		PQBP1	Dorsal + Ventral spn27A (8)	S	54
7479	Q9VC10	Q9VC10	Prolyl 3-hydroxylase sudestada1	PIG-S;sud1	Dorsal + Ventral spn27A (8)	S	6
7539	Q9VC60	Q9VC60			Dorsal + Ventral spn27A (8)	S	197
7656	Q9VCI7	Q9VCI7		RanBP3	Dorsal + Ventral spn27A (8)	S	84
7708	Q9VCX1	Q9VCX1	Regulator of G-protein signaling loco	loco;loco-RC	Dorsal + Ventral spn27A (8)	S	763
7734	Q9VDD2	Q9VDD2		SNF4Agamma	Dorsal + Ventral spn27A (8)	S	571
7767	Q9VDK7	Q9VDK7	Signal recognition particle subunit SRP72	Srp72	Dorsal + Ventral spn27A (8)	S	620
7850	Q9VEL2	Q9VEL2		Brf	Dorsal + Ventral spn27A (8)	S	347
7893	Q9VF03	Q9VF03		mor	Dorsal + Ventral spn27A (8)	S	889
7936	Q9VG01	Q9VG01			Dorsal + Ventral spn27A (8)	S	11
8114	Q9VHK1	Q9VHK1		pyd	Dorsal + Ventral spn27A (8)	S	42
8255	Q9VIP9	Q9VIP9	Condensin complex subunit 2	barr	Dorsal + Ventral spn27A (8)	S	52
8477	Q9VKQ9	Q9VKQ9	Protein dpy-30 homolog	Dpy-30L1	Dorsal + Ventral spn27A (8)	S	70
8498	Q9VKW2	Q9VKW2		pie	Dorsal + Ventral spn27A (8)	S	481
8677	Q9VMI9	Q9VMI9		mtm	Dorsal + Ventral spn27A (8)	S	20
8700	Q9VN21	Q9VN21		lost	Dorsal + Ventral spn27A (8)	S	314
8795	Q9VNE0	Q9VNE0			Dorsal + Ventral spn27A (8)	S	1375
8796	Q9VNE0	Q9VNE0			Dorsal + Ventral spn27A (8)	S	1377
8827	Q9VNI3	Q9VNI3	UPF0609 protein CG1218	CG1218	Dorsal + Ventral spn27A (8)	S	72
8840	Q9VNP5	Q9VNP5	Putative ATP-dependent RNA helicase BoYb	BoYb	Dorsal + Ventral spn27A (8)	S	1038
8853	Q9VP05	Q9VP05	Mediator of RNA polymerase II transcription subunit 1	MED1	Dorsal + Ventral spn27A (8)	S	1266
8882	Q9VP57	Q9VP57		pzg	Dorsal + Ventral spn27A (8)	S	570
8897	Q9VPC0	Q9VPC0	Serine/threonine-protein kinase PITSLRE	Pitslre	Dorsal + Ventral spn27A (8)	S	880
9092	Q9VR38	Q9VR38		Mon1	Dorsal + Ventral spn27A (8)	S	65
9110	Q9VRH6	Q9VRH6	Translation factor waclaw, mitochondrial	waw	Dorsal + Ventral spn27A (8)	S	470
9241	Q9VT00	Q9VT00		Jarid2	Dorsal + Ventral spn27A (8)	S	316
9254	Q9VT61	Q9VT61			Dorsal + Ventral spn27A (8)	S	181
9348	Q9VTU0	Q9VTU0	Protein KRI1 homolog	CG5645	Dorsal + Ventral spn27A (8)	S	274
9446	Q9VU89	Q9VU89			Dorsal + Ventral spn27A (8)	S	463
9455	Q9VUB5	Q9VUB5		upSET	Dorsal + Ventral spn27A (8)	S	2466
9476	Q9VUE5	Q9VUE5		stwl	Dorsal + Ventral spn27A (8)	S	967
9614	Q9VVD9	Q9VVD9	Adenosine 3'-phospho 5'-phosphosulfate transporter 2	Papst2	Dorsal + Ventral spn27A (8)	S	387
9712	Q9VWE0	Q9VWE0	Cytokine receptor	dome	Dorsal + Ventral spn27A (8)	S	980
9754	Q9VWK5	Q9VWK5		Ulp1	Dorsal + Ventral spn27A (8)	S	1115
9836	Q9VX24	Q9VX24			Dorsal + Ventral spn27A (8)	S	279
9844	X2JFW6	X2JFW6			Dorsal + Ventral spn27A (8)	S	151
9951	Q9VXW2	Q9VXW2			Dorsal + Ventral spn27A (8)	S	234
10089	Q9VYX4	Q9VYX4		Kmn1	Dorsal + Ventral spn27A (8)	S	6
10119	X2JEU3	X2JEU3		CG1737-RA	Dorsal + Ventral spn27A (8)	S	83
10122	X2JEU3	X2JEU3		CG1737-RA	Dorsal + Ventral spn27A (8)	S	88
10148	Q9VZ60	Q9VZ60			Dorsal + Ventral spn27A (8)	S	995
10152	Q9VZ60	Q9VZ60			Dorsal + Ventral spn27A (8)	S	654
10160	Q9VZ60	Q9VZ60			Dorsal + Ventral spn27A (8)	S	766
10167	Q9VZD8	Q9VZD8	THUMP domain-containing protein 1 homolog	CG15014	Dorsal + Ventral spn27A (8)	S	305
10326	Q9W1A9	Q9W1A9	Histone acetyltransferase	enok	Dorsal + Ventral spn27A (8)	S	1230
10342	Q9W1H3	Q9W1H3		Upf3	Dorsal + Ventral spn27A (8)	S	447
10381	Q9W1N8	Q9W1N8		mi	Dorsal + Ventral spn27A (8)	S	408
10487	Q9W2U7	Q9W2U7		nocte	Dorsal + Ventral spn27A (8)	S	980
10489	Q9W2U7	Q9W2U7		nocte	Dorsal + Ventral spn27A (8)	S	983
10589	Q9W3D1	Q9W3D1		Caf1-180	Dorsal + Ventral spn27A (8)	S	1182
10590	Q9W3D1	Q9W3D1		Caf1-180	Dorsal + Ventral spn27A (8)	S	106
10647	X2JE07	X2JE07		CG1677-RA	Dorsal + Ventral spn27A (8)	S	136
10665	X2JE07	X2JE07		CG1677-RA	Dorsal + Ventral spn27A (8)	S	23
10989	Q9XZ21	Q9XZ21		snama	Dorsal + Ventral spn27A (8)	S	857
11252	X2JC00	X2JC00		RhoGAP1A	Dorsal + Ventral spn27A (8)	S	501
11253	X2JC00	X2JC00		RhoGAP1A	Dorsal + Ventral spn27A (8)	S	504
11324	A0A0B4K6D6	A0A0B4K6D6		cic	Dorsal + Ventral spn27A (8)	T	1130
11564	A0A0S0X2W5	A0A0S0X2W5		FDY	Dorsal + Ventral spn27A (8)	T	189
11590	A1Z898	A1Z898		Caf1-105	Dorsal + Ventral spn27A (8)	T	727
11593	A1Z898	A1Z898		Caf1-105	Dorsal + Ventral spn27A (8)	T	614
11775	Q9VI18	Q9VI18		BcDNA:LD21969	Dorsal + Ventral spn27A (8)	T	316
11809	E1JHE1	E1JHE1	Kinesin-like protein	Klp31E	Dorsal + Ventral spn27A (8)	T	1002
11813	Q9VMV9	Q9VMV9	Reticulon-like protein	Rtnl1	Dorsal + Ventral spn27A (8)	T	233
11817	M9PE12	M9PE12	Nucleosome-remodeling factor subunit NURF301	E(bx)	Dorsal + Ventral spn27A (8)	T	1993
11894	M9MS86	M9MS86		Mur2B	Dorsal + Ventral spn27A (8)	T	690
11960	M9NG39	M9NG39	Zinc finger protein on ecdysone puffs	Pep	Dorsal + Ventral spn27A (8)	T	669
11961	M9NG39	M9NG39	Zinc finger protein on ecdysone puffs	Pep	Dorsal + Ventral spn27A (8)	T	404
11986	Q9VIV0	Q9VIV0			Dorsal + Ventral spn27A (8)	T	273
12046	M9PFZ1;Q7KTV5	Q7KTV5		Nopp140	Dorsal + Ventral spn27A (8)	T	339
13088	Q9VQF7	Q9VQF7		Bacc	Dorsal + Ventral spn27A (8)	T	54
12165	P15348	P15348	DNA topoisomerase 2	Top2	Dorsal + Ventral spn27A (8)	T	1352
12219	P46863	P46863	Bipolar kinesin KRP-130	Klp61F	Dorsal + Ventral spn27A (8)	T	1049
12250	Q05913	Q05913	General transcription factor IIF subunit 1	TfIIFalpha	Dorsal + Ventral spn27A (8)	T	341
12262	Q0E8J0	Q0E8J0		MEP-1	Dorsal + Ventral spn27A (8)	T	366
12390	Q7K0X3	Q7K0X3			Dorsal + Ventral spn27A (8)	T	916
12426	Q7KMH9	Q7KMH9		wde	Dorsal + Ventral spn27A (8)	T	717
12453	Q7KTG2	Q7KTG2		Apoltp	Dorsal + Ventral spn27A (8)	T	474
12459	Q7KU82	Q7KU82		smid	Dorsal + Ventral spn27A (8)	T	500
12499	Q86BP6	Q86BP6		elg1	Dorsal + Ventral spn27A (8)	T	24
12682	Q9V3H2	Q9V3H2	26S proteasome non-ATPase regulatory subunit 14	Rpn11	Dorsal + Ventral spn27A (8)	T	264
12709	Q9V4D4	Q9V4D4		bip2	Dorsal + Ventral spn27A (8)	T	887
12802	Q9VCH5	Q9VCH5		Nup98-96;Nup98-RA	Dorsal + Ventral spn27A (8)	T	715
13057	Q9VNW2	Q9VNW2			Dorsal + Ventral spn27A (8)	T	69
12843	Q9VEF5	Q9VEF5	Inhibitor of growth protein		Dorsal + Ventral spn27A (8)	T	134
[truncated: 1,434 more rows]
