# Supplementary material for: Differential regulation of the proteome and phosphoproteome along the dorso-ventral axis of the early Drosophila embryo
Source: eLife. 2024 Sep 2;13:e99263. doi: 10.7554/eLife.99263 (PMC11466282; doi:10.7554/eLife.99263)
Supplement: Supplementary file 8. [file elife-99263-supp8.xlsx]

## Sheet: BDGP-MesodermList
FBGN	LFQ-ID	BDGP Class	DV Cluster (proteome)	BDGP-Label
				Mesoderm-Any	Trunk-Mesoderm	Head-Mesoderm	Ubiquitous
FBgn0004959	5512	Mesoderm	Lateral + Ventral VtlVsp (12)	Yes	No	No	No
FBgn0261284	6119	Mesoderm	Lateral + Ventral VtlVsp (12)	Yes	No	No	Yes
FBgn0015773	1345	Mesoderm	Lateral + Ventral VtlVsp (12)	Yes	No	No	No
FBgn0001077	1840	Mesoderm	Lateral + Ventral VtlVsp (12)	No	Yes	No	No
FBgn0037552	4330	Mesoderm	Lateral + Ventral VtlVsp (12)	Yes	No	No	No
FBgn0003002	2008	Mesoderm	Lateral + Ventral VtlVsp (12)	Yes	No	No	Yes
FBgn0003300	1364	Mesoderm	Lateral + Ventral VtlVsp (12)	Yes	No	No	No
FBgn0038134	4142	Mesoderm	Lateral + Ventral VtlVsp (12)	No	Yes	Yes	No
FBgn0003731	1847	Mesoderm	Lateral +Ventral Tl10B (10)	Yes	Yes	Yes	No
FBgn0001150	2007	Mesoderm	Dorsal+Lateral+Ventral Tl10B	Yes	No	Yes	No
FBgn0002931	4907	Mesoderm	Dorsal + Ventral Tl10B (7)	No	Yes	Yes	No
FBgn0003716	2772	Mesoderm	Dorsal + Ventral Tl10B (7)	Yes	Yes	Yes	Yes
FBgn0259111	1374	Mesoderm	Dorsal + Ventral Tl10B (7)	Yes	No	No	No
FBgn0010382	747	Mesoderm	Dorsal + Ventral Tl10B (7)	Yes	No	No	No
FBgn0000071	761	Mesoderm	Dorsal + Ventral VtlVsp (9)	Yes	No	No	Yes
FBgn0034075	89	Mesoderm	Dorsal + Ventral VtlVsp (9)	No	Yes	Yes	No
FBgn0004108	1264	Mesoderm	Dorsal + Ventral VtlVsp (9)	Yes	No	No	Yes
FBgn0000565	1452	Mesoderm	Dorsal + Ventral VtlVsp (9)	Yes	No	No	No
FBgn0086779	2168	Mesoderm	Dorsal + Ventral VtlVsp (9)	Yes	No	No	Yes
FBgn0028955	2512	Mesoderm	Dorsal + Ventral VtlVsp (9)	Yes	No	No	Yes
FBgn0035268	3159	Mesoderm	Dorsal + Ventral VtlVsp (9)	Yes	No	No	No
FBgn0036194	5236	Mesoderm	Dorsal + Ventral VtlVsp (9)	Yes	No	No	Yes
FBgn0036349	5282	Mesoderm	Dorsal + Ventral VtlVsp (9)	Yes	No	No	Yes
FBgn0262872	3352	Mesoderm	Ventral Tl10B (3)	Yes	No	No	Yes
FBgn0010282	2147	Mesoderm	Ventral Tl10B (3)	Yes	Yes	Yes	No
FBgn0000606	1854	Mesoderm	Ventral Tl10B (3)	Yes	Yes	No	No
FBgn0264491	879	Mesoderm	Ventral Tl10B (3)	Yes	No	Yes	Yes
FBgn0011837	878	Mesoderm	Ventral Tl10B (3)	Yes	No	No	No
FBgn0266756	38	Mesoderm	Ventral Tl10B (3)	Yes	No	No	Yes
FBgn0001320	1874	Mesoderm	Ventral VtlVsp (5)	Yes	No	Yes	No
FBgn0268063	5126	Mesoderm	Ventral VtlVsp (5)	Yes	Yes	No	No
FBgn0003900	411	Mesoderm	Ventral VtlVsp (5)	Yes	Yes	No	No
FBgn0035348	1291	Mesoderm	Ventral VtlVsp (5)	Yes	No	No	No
FBgn0003448	1864	Mesoderm	Ventral VtlVsp (5)	Yes	Yes	No	No
FBgn0011704	2051	Mesoderm	Ventral VtlVsp (5)	Yes	No	No	Yes
FBgn0262656	1616	Mesoderm	Ventral VtlVsp (5)	No	Yes	Yes	No
FBgn0004512	2133	Mesoderm	Ventral VtlVsp (5)	Yes	Yes	Yes	No
FBgn0026319	814	Mesoderm	Ventral VtlVsp (5)	Yes	Yes	No	No
FBgn0265276	235	Mesoderm	Ventral VtlVsp (5)	No	Yes	Yes	No
FBgn0002932	1118	Mesoderm	Ventral VtlVsp (5)	Yes	No	No	No
FBgn0031645	5038	Mesoderm	Ventral spn27A (4)	Yes	Yes	Yes	No
FBgn0262518	1708	Mesoderm	Ventral spn27A (4)	No	No	Yes	Yes
FBgn0010109	2285	Mesoderm	Ventral spn27A (4)	No	Yes	No	No
FBgn0033638	2507	Mesoderm	Ventral spn27A (4)	Yes	Yes	Yes	No
FBgn0004698	84	Mesoderm	Ventral spn27A (4)	No	Yes	Yes	Yes
FBgn0030510	5658	Mesoderm	Ventral spn27A (4)	No	Yes	Yes	No
FBgn0036007	5193	Mesoderm	Ventral spn27A (4)	No	No	Yes	No
FBgn0000489	1902	Mesoderm	Dorsal + Ventral Spn27A (8)	Yes	Yes	Yes	No
FBgn0015772	4443	Mesoderm	Dorsal + Ventral Spn27A (8)	Yes	No	No	No
FBgn0264895	4699	Mesoderm	Dorsal + Ventral Spn27A (8)	Yes	No	No	No
FBgn0010389	2150	Mesoderm	Dorsal + Ventral Spn27A (8)	Yes	No	No	No
FBgn0082582	65	Mesoderm	Dorsal (1)	Yes	No	Yes	Yes
FBgn0015371	87	Mesoderm	Dorsal (1)	Yes	Yes	Yes	No
FBgn0261477	705	Mesoderm	Dorsal (1)	Yes	Yes	Yes	No
FBgn0003145	1853	Mesoderm	Dorsal (1)	No	Yes	No	No
FBgn0003862	1933	Mesoderm	Dorsal (1)	No	Yes	No	No
FBgn0031632	5033	Mesoderm	Dorsal+ Lateral (6)	Yes	Yes	Yes	No
FBgn0029970	6105	Mesoderm	Dorsal+ Lateral (6)	Yes	No	No	No
FBgn0019936	2099	Mesoderm	Dorsal+ Lateral (6)	Yes	Yes	No	Yes
FBgn0261238	167	Mesoderm	Dorsal+ Lateral (6)	No	Yes	No	No
FBgn0039283	3793	Mesoderm	Lateral (2)	Yes	No	No	No
FBgn0003346	1481	Mesoderm	Lateral (2)	Yes	No	No	Yes
FBgn0031851	4719	Mesoderm	Lateral (2)	Yes	No	No	Yes
FBgn0002973	1455	Mesoderm	Dorsal + Lateral + Ventral spn27A	No	No	Yes	No
FBgn0012036	4644	Mesoderm	Dorsal + Lateral + Ventral spn27A	No	No	Yes	No
FBgn0031006	5494	Mesoderm	Dorsal + Lateral + Ventral spn27A	Yes	No	No	Yes
FBgn0052423	3109	Mesoderm	Dorsal + Lateral + Ventral spn27A	No	No	Yes	No
FBgn0016034	506	Mesoderm	Dorsal + Lateral + Ventral spn27A	Yes	Yes	No	Yes
FBgn0002985	1957	Mesoderm	Lateral + Ventral spn27A (11)	Yes	No	No	No
FBgn0034158	2181	Mesoderm	Lateral + Ventral spn27A (11)	No	Yes	No	No
FBgn0026879	6304	Mesoderm	Lateral + Ventral spn27A (11)	Yes	No	No	Yes
FBgn0014018	3274	Mesoderm	Lateral + Ventral spn27A (11)	No	Yes	No	No
