# Supplementary material for: Differential regulation of the proteome and phosphoproteome along the dorso-ventral axis of the early Drosophila embryo
Source: eLife. 2024 Sep 2;13:e99263. doi: 10.7554/eLife.99263 (PMC11466282; doi:10.7554/eLife.99263)
Supplement: Supplementary file 9. — The outcome of the RNA-Proteome comparison (perfect, partial or mismatch) is indicated in two different ways: 1 = 'yes' and 0 = 'no' for each type of outcome, and by coloring the rows (each compared gene-protein distribution); white is perfect overlap, gray is partial overlap and black is a mismatch. Red rows indicate proteins were not assigned to any outcome in the RNA-proteome comparison (Clusters 13 -DLVTl10B/def- and 14 -DLVspn27Aex/def-). [file elife-99263-supp9.xlsx]

## Sheet: ColorCodingIsOutcomeOverlay
FBGN	LFQ_ID	RNA Set	Proteome Cluster	Pearson	Perfect Overlay	Partial Overlay	Mismatch
FBgn0000071	761	dorsal+ventral	Dorsal + Ventral Tl10B spn27A (9)	0.858562	1	0	0
FBgn0000163	5550	dorsal	Lateral (2)	0.64591	0	0	1
FBgn0000180	1377	dorsal+lateral	Lateral (2)	0.790126	0	1	0
FBgn0000250	1487	lateral+ventral	Dorsal + Lateral + Ventral Tl10B (13)	0.622585
FBgn0000479	6211	dorsal	Dorsal + Lateral + Ventral Tl10B (13)	0.586178
FBgn0000489	1902	ventral	Dorsal + Ventral spn27A (8)	0.877531	0	1	0
FBgn0002121	1286	dorsal+ventral	Lateral + Ventral Tl10B spn27A (12)	0.375553	0	1	0
FBgn0002931	4907	dorsal+ventral	Dorsal + Ventral Tl10B (7)	1	1	0	0
FBgn0002932	1118	lateral+ventral	Ventral Tl10B spn27A (5)	1	0	1	0
FBgn0003002	2008	dorsal+ventral	Lateral + Ventral Tl10B spn27A (12)	0.394188	0	1	0
FBgn0003310	743	lateral	Ventral Tl10B spn27A (5)	0.675921	0	0	1
FBgn0003326	1936	lateral	Lateral (2)	0.781912	1	0	0
FBgn0003396	173	dorsal+ventral	Dorsal + Ventral Tl10B spn27A (9)	0.655434	1	0	0
FBgn0003448	1864	ventral	Ventral Tl10B spn27A (5)	0.980543	1	0	0
FBgn0003463	1638	lateral	Lateral (2)	0.958902	1	0	0
FBgn0003502	1865	dorsal	Dorsal + Ventral Tl10B spn27A (9)	0.74058	0	1	0
FBgn0003607	1849	ventral	Dorsal + Lateral + Ventral spn27A (14)	0.765681
FBgn0003716	2772	ventral	Dorsal + Ventral Tl10B (7)	0.792195	0	1	0
FBgn0003862	1933	dorsal+ventral	Dorsal (1)	0.39353	0	1	0
FBgn0003865	2087	dorsal	Dorsal + Lateral (6)	0.675157	0	1	0
FBgn0003900	411	ventral	Ventral Tl10B spn27A (5)	1	1	0	0
FBgn0004052	1939	dorsal	Dorsal (1)	0.686248	1	0	0
FBgn0004053	1868	dorsal	Dorsal + Ventral Tl10B (7)	0.636071	0	1	0
FBgn0004108	1264	dorsal+ventral	Dorsal + Ventral Tl10B spn27A (9)	0.767887	1	0	0
FBgn0004369	30	dorsal	Dorsal + Ventral Tl10B spn27A (9)	0.625434	0	1	0
FBgn0004456	2252	dorsal+lateral	Lateral + Ventral Tl10B (10)	0.802201	0	1	0
FBgn0004512	2133	ventral	Ventral Tl10B spn27A (5)	0.880241	1	0	0
FBgn0004595	36	lateral+ventral	Lateral + Ventral Tl10B spn27A (12)	0.490606	1	0	0
FBgn0004859	1923	dorsal+lateral	Lateral (2)	0.786137	0	1	0
FBgn0004868	4641	dorsal	Dorsal + Ventral Tl10B spn27A (9)	0.592885	0	1	0
FBgn0004959	5512	lateral+ventral	Lateral + Ventral Tl10B spn27A (12)	0.545851	1	0	0
FBgn0005278	741	dorsal+ventral	Dorsal + Lateral (6)	0.477539	0	1	0
FBgn0005655	1908	lateral+ventral	Dorsal + Lateral + Ventral spn27A (14)	0.515237
FBgn0005771	2271	lateral+ventral	Dorsal + Lateral + Ventral spn27A (14)	0.383014
FBgn0010238	2268	dorsal+lateral	Dorsal + Lateral (6)	0.883568	1	0	0
FBgn0010313	432	dorsal+lateral	Dorsal (1)	0.744105	0	1	0
FBgn0010382	747	ventral	Dorsal + Ventral Tl10B (7)	0.722042	0	1	0
FBgn0010389	2150	ventral	Dorsal + Ventral spn27A (8)	0.920545	0	1	0
FBgn0011206	754	ventral	Dorsal + Ventral spn27A (8)	0.680892	0	1	0
FBgn0011592	349	dorsal	Dorsal (1)	0.824796	1	0	0
FBgn0011704	2051	lateral+ventral	Ventral Tl10B spn27A (5)	0.716197	0	1	0
FBgn0011837	878	ventral	Ventral Tl10B (3)	0.730796	1	0	0
FBgn0012037	2218	dorsal	Dorsal + Ventral Tl10B spn27A (9)	0.676221	0	1	0
FBgn0013272	409	dorsal+lateral	Dorsal (1)	0.82325	0	1	0
FBgn0015221	290	lateral+ventral	Dorsal + Lateral + Ventral Tl10B (13)	0.563114
FBgn0015773	1345	ventral	Lateral + Ventral Tl10B spn27A (12)	0.848235	0	1	0
FBgn0016034	506	ventral	Dorsal + Lateral + Ventral spn27A (14)	0.65816
FBgn0016926	4938	lateral	Dorsal + Lateral + Ventral Tl10B (13)	0.746427
FBgn0020251	1116	dorsal	Dorsal + Ventral Tl10B (7)	0.696554	0	1	0
FBgn0020257	162	dorsal+lateral	Dorsal + Ventral spn27A (8)	0.668738	0	1	0
FBgn0021776	3965	dorsal+lateral	Dorsal + Lateral + Ventral Tl10B (13)	0.712189
FBgn0021776	307	dorsal+lateral	Lateral (2)	0.712189	0	1	0
FBgn0022768	6184	dorsal+ventral	Lateral (2)	0.400368	0	0	1
FBgn0022984	1721	dorsal+lateral	Lateral (2)	0.786233	0	1	0
FBgn0023129	5183	lateral	Lateral (2)	0.545803	1	0	0
FBgn0024150	1479	dorsal+ventral	Dorsal + Ventral spn27A (8)	0.481076	1	0	0
FBgn0025776	2794	lateral	Dorsal + Lateral + Ventral Tl10B (13)	0.624487
FBgn0026061	5358	dorsal+lateral	Dorsal + Ventral Tl10B spn27A (9)	0.668896	0	1	0
FBgn0026319	814	ventral	Ventral Tl10B spn27A (5)	0.81662	1	0	0
FBgn0026431	4587	dorsal+ventral	Dorsal (1)	0.362428	0	1	0
FBgn0027108	1147	lateral+ventral	Lateral + Ventral Tl10B (10)	0.441617	1	0	0
FBgn0027507	540	dorsal+ventral	Lateral + Ventral spn27A (11)	0.407432	0	1	0
FBgn0027535	6284	lateral+ventral	Dorsal + Ventral Tl10B spn27A (9)	0.388419	0	1	0
FBgn0027579	2911	dorsal+ventral	Lateral + Ventral Tl10B spn27A (12)	0.706495	0	1	0
FBgn0027660	3016	dorsal+lateral	Lateral + Ventral Tl10B (10)	0.752055	0	1	0
FBgn0028371	154	dorsal+lateral	Dorsal + Lateral + Ventral Tl10B (13)	0.842785
FBgn0028789	3441	dorsal	Dorsal (1)	0.787898	1	0	0
FBgn0029114	3560	lateral	Dorsal + Lateral + Ventral Tl10B (13)	0.588111
FBgn0029941	6543	lateral+ventral	Lateral + Ventral Tl10B spn27A (12)	0.369881	1	0	0
FBgn0030251	5736	lateral	Ventral Tl10B (3)	0.572546	0	0	1
FBgn0030301	5721	dorsal+ventral	Lateral + Ventral Tl10B spn27A (12)	0.362286	0	1	0
FBgn0030306	881	lateral+ventral	Dorsal + Lateral (6)	0.403832	0	1	0
FBgn0030482	5666	ventral	Ventral Tl10B spn27A (5)	0.764671	1	0	0
FBgn0030510	5658	ventral	Ventral spn27A (4)	0.965843	1	0	0
FBgn0030766	5567	ventral	Ventral Tl10B (3)	0.730558	1	0	0
FBgn0031298	1399	dorsal+ventral	Dorsal (1)	0.370441	0	1	0
FBgn0031645	5038	ventral	Ventral spn27A (4)	0.891495	1	0	0
FBgn0031738	2438	ventral	Dorsal + Lateral + Ventral spn27A (14)	0.753225
FBgn0032244	4595	lateral+ventral	Dorsal (1)	0.376006	0	0	1
FBgn0033159	2191	lateral	Lateral + Ventral Tl10B spn27A (12)	0.673087	0	1	0
FBgn0033421	2486	dorsal+ventral	Dorsal + Lateral + Ventral spn27A (14)	0.406606
FBgn0033483	3120	dorsal	Dorsal + Ventral Tl10B (7)	0.739015	0	1	0
FBgn0033638	2507	ventral	Ventral spn27A (4)	0.84325	1	0	0
FBgn0033802	145	lateral	Dorsal + Lateral + Ventral spn27A (14)	0.507459
FBgn0033855	2599	lateral+ventral	Lateral + Ventral Tl10B spn27A (12)	0.499012	1	0	0
FBgn0033889	650	ventral	Dorsal (1)	0.750899	0	0	1
FBgn0033988	3603	dorsal+lateral	Dorsal + Ventral Tl10B (7)	0.744725	0	1	0
FBgn0034066	669	lateral+ventral	Ventral spn27A (4)	0.415807	0	1	0
FBgn0034075	89	ventral	Dorsal + Ventral Tl10B spn27A (9)	0.895433	0	1	0
FBgn0034158	2181	lateral+ventral	Lateral + Ventral spn27A (11)	0.439128	1	0	0
FBgn0034514	725	dorsal+lateral	Lateral + Ventral Tl10B (10)	0.841917	0	1	0
FBgn0034724	5978	ventral	Dorsal + Ventral Tl10B (7)	0.678121	0	1	0
FBgn0035315	5814	dorsal+ventral	Dorsal + Lateral (6)	0.48059	0	1	0
FBgn0035348	1291	ventral	Ventral Tl10B spn27A (5)	0.936796	1	0	0
FBgn0035388	1114	dorsal	Dorsal (1)	0.762394	1	0	0
FBgn0035542	1355	dorsal+lateral	Dorsal + Lateral (6)	0.678527	1	0	0
FBgn0035558	5748	ventral	Dorsal + Lateral + Ventral spn27A (14)	0.783408
FBgn0036142	5225	dorsal+lateral	Dorsal + Lateral + Ventral Tl10B (13)	0.730612
FBgn0036349	5282	dorsal+ventral	Dorsal + Ventral Tl10B spn27A (9)	0.793611	1	0	0
FBgn0036353	5283	dorsal+ventral	Dorsal + Ventral spn27A (8)	0.44698	1	0	0
FBgn0037085	895	lateral	Lateral (2)	0.551788	1	0	0
FBgn0037184	4847	ventral	Ventral Tl10B (3)	0.722834	1	0	0
FBgn0037213	4780	dorsal+lateral	Dorsal + Ventral Tl10B (7)	0.763252	0	1	0
FBgn0037215	241	ventral	Ventral spn27A (4)	0.628736	1	0	0
FBgn0037797	4237	dorsal	Dorsal (1)	0.806905	1	0	0
FBgn0037819	4227	ventral	Lateral (2)	0.930701	0	0	1
FBgn0037822	4226	lateral+ventral	Ventral Tl10B (3)	0.376714	0	1	0
FBgn0038071	4156	dorsal	Dorsal (1)	0.610753	1	0	0
FBgn0038134	4142	ventral	Lateral + Ventral Tl10B spn27A (12)	0.78022	0	1	0
FBgn0038446	4055	dorsal	Dorsal (1)	0.570033	1	0	0
FBgn0038476	3158	dorsal+ventral	Ventral Tl10B (3)	0.396066	0	1	0
FBgn0038853	3942	ventral	Lateral + Ventral spn27A (11)	0.678716	0	1	0
FBgn0039337	3778	lateral+ventral	Ventral Tl10B spn27A (5)	0.366545	0	1	0
FBgn0039559	3116	dorsal+ventral	Dorsal (1)	0.477148	0	1	0
FBgn0039678	1042	lateral	Dorsal (1)	0.642837	0	0	1
FBgn0039923	3573	lateral+ventral	Dorsal + Lateral + Ventral spn27A (14)	0.378364
FBgn0039970	539	lateral+ventral	Ventral spn27A (4)	0.393603	0	1	0
FBgn0040271	1046	lateral	Ventral spn27A (4)	0.609375	0	0	1
FBgn0040308	3498	lateral+ventral	Dorsal + Ventral spn27A (8)	0.390702	0	1	0
FBgn0052190	5396	ventral	Dorsal + Lateral + Ventral spn27A (14)	0.752689
FBgn0052423	3109	ventral	Dorsal + Lateral + Ventral spn27A (14)	0.634693
FBgn0063485	1298	dorsal	Ventral Tl10B (3)	0.611505	0	0	1
FBgn0067779	3559	dorsal+ventral	Lateral + Ventral Tl10B (10)	0.428803	0	1	0
FBgn0085212	819	dorsal+ventral	Ventral Tl10B (3)	0.371121	0	1	0
FBgn0085412	249	dorsal+lateral	Dorsal + Lateral + Ventral Tl10B (13)	0.855276
FBgn0085424	820	dorsal+ventral	Dorsal + Lateral + Ventral spn27A (14)	0.3791
FBgn0086445	4429	dorsal+ventral	Dorsal + Lateral + Ventral spn27A (14)	0.405461
FBgn0259111	1374	ventral	Dorsal + Ventral Tl10B (7)	0.696196	0	1	0
FBgn0259211	388	dorsal+lateral	Dorsal + Lateral (6)	0.889459	1	0	0
FBgn0259243	1262	lateral+ventral	Lateral (2)	0.371604	0	1	0
FBgn0259685	106	dorsal+lateral	Dorsal + Lateral + Ventral Tl10B (13)	1
FBgn0260748	5552	ventral	Lateral + Ventral Tl10B spn27A (12)	0.819832	0	1	0
FBgn0261445	1691	dorsal+ventral	Dorsal + Lateral + Ventral spn27A (14)	0.381858
FBgn0261570	1273	lateral	Lateral + Ventral spn27A (11)	0.565682	0	1	0
FBgn0261859	28	dorsal	Lateral + Ventral Tl10B spn27A (12)	0.831179	0	0	1
FBgn0261873	1187	dorsal+lateral	Dorsal + Lateral (6)	0.879871	1	0	0
FBgn0261984	853	ventral	Lateral + Ventral Tl10B spn27A (12)	0.727975	0	1	0
FBgn0262127	452	ventral	Lateral + Ventral spn27A (11)	0.816583	0	1	0
FBgn0262867	2881	dorsal+lateral	Dorsal (1)	0.887021	0	1	0
FBgn0262872	3352	ventral	Ventral Tl10B (3)	0.670303	1	0	0
FBgn0263602	5343	dorsal+ventral	Dorsal + Ventral spn27A (8)	0.394037	1	0	0
FBgn0263755	2040	ventral	Dorsal + Ventral Tl10B spn27A (9)	0.769984	0	1	0
FBgn0263930	2236	lateral	Dorsal + Ventral spn27A (8)	0.58735	0	0	1
FBgn0264089	148	dorsal+lateral	Dorsal + Lateral + Ventral Tl10B (13)	0.708254
FBgn0264491	879	ventral	Ventral Tl10B (3)	0.660577	1	0	0
FBgn0264493	4126	lateral	Dorsal + Ventral spn27A (8)	0.673423	0	0	1
FBgn0265003	551	dorsal+ventral	Lateral (2)	0.586489	0	0	1
FBgn0265140	2405	lateral	Lateral (2)	0.742697	1	0	0
FBgn0265274	471	ventral	Ventral Tl10B spn27A (5)	0.76196	1	0	0
FBgn0266418	74	dorsal+ventral	Dorsal (1)	0.609624	0	1	0
FBgn0266696	6534	dorsal	Dorsal + Ventral Tl10B spn27A (9)	0.606431	0	1	0
FBgn0266696	6536	dorsal	Dorsal + Ventral spn27A (8)	0.606431	0	1	0
FBgn0266756	38	dorsal+lateral	Ventral Tl10B (3)	0.84665	0	0	1
FBgn0268063	5126	ventral	Ventral Tl10B spn27A (5)	0.888791	1	0	0
FBgn0285926	5746	lateral+ventral	Dorsal (1)	0.450939	0	0	1
FBgn0286723	3507	ventral	Ventral Tl10B spn27A (5)	0.970862	1	0	0
FBgn0287423	503	ventral	Dorsal + Lateral (6)	0.924265	0	0	1
