# Supplementary material for: Differential regulation of the proteome and phosphoproteome along the dorso-ventral axis of the early Drosophila embryo
Source: eLife. 2024 Sep 2;13:e99263. doi: 10.7554/eLife.99263 (PMC11466282; doi:10.7554/eLife.99263)
Supplement: Supplementary file 10. — Empty cell in gene and protein name indicate the detected protein (or protein that hosts a phosphosite) had not been given a gene and/or a protein name in the Uniprot database version used in this study. NaN indicates it was not possible to calculate the deviation using a particular ventralized mutant. [file elife-99263-supp10.xlsx]

## Sheet: LFQ_Deviation_DVClusters1-12
Gene_Name	Protein_Name	Protein_IDs	Majority_Protein_IDs	DV Cluster	LFQ_Log2FC_TL	LFQ_Log2FC_SP
Gp150		A0A0B4LGB0;Q24007;Q8MLT4	A0A0B4LGB0;Q24007;Q8MLT4	Dorsal (1)	0.235959	0.223949
Hf		Q9VIQ4	Q9VIQ4	Dorsal (1)	0.984194	NaN
vito		Q8SWS7	Q8SWS7	Dorsal (1)	0.356122	0.24385
Mkk4		O61444	O61444	Dorsal (1)	0.50337	0.445901
Ptr		Q86P36;A0A0B4KED8;A0A0B4KEC6	Q86P36	Dorsal (1)	0.407667	0.248432
	Oxysterol-binding protein	Q8IN56;Q9I7I8;A0A0B4JDD8;A0A0B4JDG2;B7Z0M9;Q7KSB3;A0A0B4JCZ0	Q8IN56;Q9I7I8;A0A0B4JDD8;A0A0B4JDG2;B7Z0M9;Q7KSB3;A0A0B4JCZ0	Dorsal (1)	0.631789	0.540904
tmod;tmod-RC		A8JRH3;A0A0B4K6N4;O46231;E1JJ21;Q9VA56;Q9VA58;C7LAH8;A0A0B4KHF2;Q9VA59;A0A0B4K7R6;A0A0B4KHW6	A8JRH3;A0A0B4K6N4;O46231;E1JJ21;Q9VA56;Q9VA58;C7LAH8;A0A0B4KHF2;Q9VA59;A0A0B4K7R6;A0A0B4KHW6	Dorsal (1)	-0.14147	-0.118869
wake		A0A0B4K6W6;A0A0B4LHH4;A0A0B4K6D0	A0A0B4K6W6;A0A0B4LHH4;A0A0B4K6D0	Dorsal (1)	NaN	-0.198718
chn	Protein charlatan	A0A0B4K876;A0A0B4K7Z6;A0A0B4K7A3;Q7YU81;A0A0B4K7Q9	A0A0B4K876;A0A0B4K7Z6;A0A0B4K7A3;Q7YU81	Dorsal (1)	-0.609447	-0.484318
LRP1		A1Z7C4;A0A0B4KFD1	A1Z7C4;A0A0B4KFD1	Dorsal (1)	0.346904	0.440817
Acyp2	Acylphosphatase-2	A0A0B4KG16;Q9VF36	A0A0B4KG16;Q9VF36	Dorsal (1)	0.790877	0.79379
AnxB9	Annexin;Annexin B9	A0A0B4KH34;P22464	A0A0B4KH34;P22464	Dorsal (1)	-0.424778	-0.433249
Tnks	Tankyrase	A0A0B4KI19;Q9VBP3	A0A0B4KI19;Q9VBP3	Dorsal (1)	0.491779	0.541762
fra		A0A0B4LEX6;A1Z920;A1Z921	A0A0B4LEX6;A1Z920;A1Z921	Dorsal (1)	-0.996856	-0.94191
Cyp12d1-p	Probable cytochrome P450 12d1 proximal, mitochondrial	A0A0B4LF45;P82712	A0A0B4LF45;P82712	Dorsal (1)	-1.29814	-1.30226
CG8399	Putative ferric-chelate reductase 1 homolog	A0A0B4LGL5;Q8MSU3	A0A0B4LGL5;Q8MSU3	Dorsal (1)	0.327747	0.35048
corto	Centrosomal and chromosomal factor	A0A0B4LGR6;P41046	A0A0B4LGR6;P41046	Dorsal (1)	0.451604	0.386
flfl	Serine/threonine-protein phosphatase 4 regulatory subunit 3	A0A0C4DHE6;Q9VFS5	A0A0C4DHE6;Q9VFS5	Dorsal (1)	0.279093	0.27186
Mical	Protein-methionine sulfoxide oxidase Mical	A0A126GUS4;Q86BA1;A0A0B4K703;A0A0B4K6D5;A0A126GUS6;A0A0B4K6N6	A0A126GUS4;Q86BA1;A0A0B4K703;A0A0B4K6D5;A0A126GUS6;A0A0B4K6N6	Dorsal (1)	0.192011	0.218184
didum		A1Z6Z9;A1Z6Z8;A1Z700	A1Z6Z9;A1Z6Z8;A1Z700	Dorsal (1)	0.158773	0.274448
CG2144-RA		A1Z705	A1Z705	Dorsal (1)	0.350226	0.362606
rnh1		A1Z768;Q7JY33	A1Z768;Q7JY33	Dorsal (1)	0.402724	0.408701
CG18343-RA		A1Z8T3	A1Z8T3	Dorsal (1)	0.181872	0.195198
		A1Z9K0	A1Z9K0	Dorsal (1)	0.187742	0.150147
CG4847-RD		Q7K5N8;A1ZAU4	Q7K5N8;A1ZAU4	Dorsal (1)	0.302869	0.24921
GstE7		A1ZB72	A1ZB72	Dorsal (1)	-0.314443	-0.310856
slim	Kelch domain-containing protein 10 homolog	A1ZB86	A1ZB86	Dorsal (1)	0.993585	1.02299
CG11257-RA		A1ZBK6	A1ZBK6	Dorsal (1)	0.231539	0.215796
EcR	Ecdysone receptor	A4UZ51;E1JGY2;P34021	A4UZ51;E1JGY2;P34021	Dorsal (1)	-0.630026	-0.637317
Patj	Patj homolog	A4V1B2;Q9NB04	A4V1B2;Q9NB04	Dorsal (1)	0.399053	0.412446
Gyc76C	Guanylate cyclase	Q7JQ32;A4V243	Q7JQ32;A4V243	Dorsal (1)	-0.573397	-0.693955
CG34039-RA		A8E6W0	A8E6W0	Dorsal (1)	0.21054	0.283317
		A8JNV1	A8JNV1	Dorsal (1)	-0.500543	-0.49824
kappaB-Ras	NF-kappa-B inhibitor-interacting Ras-like protein	B7YZS7;Q9V4L4	B7YZS7;Q9V4L4	Dorsal (1)	0.299986	0.374119
		B7Z0D7;Q9VSE1	B7Z0D7;Q9VSE1	Dorsal (1)	0.349119	0.362014
CG42245-RA		B7Z0I5	B7Z0I5	Dorsal (1)	0.177524	0.159346
CG34408-RA		B7Z138;Q9W2X2;X2JB32;Q8IRL5;X2JD61;X2JEC6;X2JEP7;X2JJ95;B7Z140;X2JB38	B7Z138;Q9W2X2;X2JB32;Q8IRL5;X2JD61;X2JEC6;X2JEP7;X2JJ95;B7Z140;X2JB38	Dorsal (1)	0.313149	0.389704
Obp99a	General odorant-binding protein 99a	D1FYH5;Q9VAJ4	D1FYH5;Q9VAJ4	Dorsal (1)	0.714301	0.646753
CaMKII	Calcium/calmodulin-dependent protein kinase type II alpha chain	D1YSG7;Q00168;L0MLR4;L0MLP2	D1YSG7;Q00168;L0MLR4;L0MLP2	Dorsal (1)	0.272264	0.257536
bsk	Mitogen-activated protein kinase;Stress-activated protein kinase JNK	E1JHD6;P92208	E1JHD6;P92208	Dorsal (1)	-0.664189	-0.811225
p38a;Mpk2	Mitogen-activated protein kinase;Mitogen-activated protein kinase 14A	E1JIV6;O62618	E1JIV6;O62618	Dorsal (1)	-0.434294	-0.43928
Fur2	Furin-like protease 2	E1JJL4;P30432;E1JJL5	E1JJL4;P30432	Dorsal (1)	0.451202	0.488345
GstT3		Q9VRA4;E1JJS1	Q9VRA4;E1JJS1	Dorsal (1)	0.502923	0.56238
Taf2	Transcription initiation factor TFIID subunit 2	E8NHB1;Q24325	E8NHB1;Q24325	Dorsal (1)	0.202074	0.226729
PGRP-LD-RB;Pmi	Transmembrane protein 11 homolog, mitochondrial	G4LTX1;Q8IQ56	G4LTX1;Q8IQ56	Dorsal (1)	-0.58367	-0.497153
CG16935-RA;CG16935	Probable trans-2-enoyl-CoA reductase, mitochondrial	H8F4T6;Q9V6U9	H8F4T6;Q9V6U9	Dorsal (1)	0.388053	0.44598
spen	Protein split ends	M9NCM6;M9PDR5;Q8SX83;M9PBZ3;M9PBJ8	M9NCM6;M9PDR5;Q8SX83;M9PBZ3;M9PBJ8	Dorsal (1)	0.544164	0.552029
Plp		M9ND93;M9PCJ5;Q400N2;M9PFP0;M9PI63;M9PFA8;M9PFJ2;M9PCK2;M9NFV3;M9PFA3;M9PFP4;Q400N1	M9ND93;M9PCJ5;Q400N2;M9PFP0;M9PI63;M9PFA8;M9PFJ2;M9PCK2;M9NFV3;M9PFA3;M9PFP4	Dorsal (1)	0.177337	0.137625
Pp2B-14D	Serine/threonine-protein phosphatase;Serine/threonine-protein phosphatase 2B catalytic subunit 2	M9NE01;Q27889	M9NE01;Q27889	Dorsal (1)	0.465581	0.453054
chic	Profilin	M9NEU5;P25843	M9NEU5;P25843	Dorsal (1)	-0.50607	-0.484334
BG:DS09217.4		Q9V3K7;M9NF32	Q9V3K7;M9NF32	Dorsal (1)	0.290101	0.253344
RhoGAP19D		M9NFH4;X2JEI9;E1JJS2;Q9VRA6	M9NFH4;X2JEI9;E1JJS2;Q9VRA6	Dorsal (1)	0.446913	0.551149
Atg4a		M9PBM3;Q9VPW2	M9PBM3;Q9VPW2	Dorsal (1)	0.32205	0.404747
CG12182-RA		M9PED1;Q9VZZ7	M9PED1;Q9VZZ7	Dorsal (1)	0.170289	0.259912
gdl	Gonadal protein gdl	M9PFK4;P22468	M9PFK4;P22468	Dorsal (1)	-0.633386	-0.565984
CG5830-RA		Q9VUX0;M9PFN0	Q9VUX0;M9PFN0	Dorsal (1)	0.328177	0.41576
		M9PGG7	M9PGG7	Dorsal (1)	0.594594	0.657099
CG32521-RB		M9PI18;Q9VRF7;M9PHP6	M9PI18;Q9VRF7;M9PHP6	Dorsal (1)	0.600533	0.645078
Ice	Caspase;Caspase subunit p21;Caspase subunit p12	O01382	O01382	Dorsal (1)	0.303992	0.312456
Chi		O18353;Q7KVG9	O18353;Q7KVG9	Dorsal (1)	0.370404	0.423434
Act42A	Actin-42A	P02572	P02572	Dorsal (1)	-0.641401	-0.715901
prd	Segmentation protein paired	P06601	P06601	Dorsal (1)	0.720635	0.6528
Ccdc56	Cytochrome c oxidase assembly factor 3, mitochondrial	P0DKM0	P0DKM0	Dorsal (1)	0.30384	0.370393
Tbp	TATA-box-binding protein	P20227	P20227	Dorsal (1)	-0.743125	-0.651886
trx	Histone-lysine N-methyltransferase trithorax	P20659	P20659	Dorsal (1)	NaN	-0.770491
Z600	Protein Z600	P22469	P22469	Dorsal (1)	0.438863	0.486147
tld	Dorsal-ventral patterning protein tolloid	P25723	P25723	Dorsal (1)	-0.234917	-0.164366
RpS6	40S ribosomal protein S6	P29327	P29327	Dorsal (1)	-0.574927	-0.610748
Rala	Ras-related protein Ral-a	P48555	P48555	Dorsal (1)	0.267625	0.360401
RpS13	40S ribosomal protein S13	X2J950;Q03334	X2J950;Q03334	Dorsal (1)	-0.576003	-0.522765
		Q0E8G6;Q9VSY2	Q0E8G6;Q9VSY2	Dorsal (1)	0.356857	0.386889
Lsd-2		Q0KHS7	Q0KHS7	Dorsal (1)	0.303443	0.405905
Dsor1	Dual specificity mitogen-activated protein kinase kinase dSOR1	Q24324;X2JAZ3;REV__CON__Q28107	Q24324;X2JAZ3	Dorsal (1)	0.398227	0.404913
hop	Tyrosine-protein kinase hopscotch	Q24592	Q24592	Dorsal (1)	0.302142	0.267614
Apf		Q4V6M1	Q4V6M1	Dorsal (1)	0.2695	0.359106
		Q8IR19;Q59E43	Q8IR19;Q59E43	Dorsal (1)	0.756156	0.768511
CG17698-RA		Q5LJP6;A4V2C3;Q5LJP5;M9PGA6	Q5LJP6;A4V2C3;Q5LJP5;M9PGA6	Dorsal (1)	0.506338	0.608566
Hsl		Q7JR83	Q7JR83	Dorsal (1)	0.369682	0.43532
CG30491;CG30495		Q7JUS1	Q7JUS1	Dorsal (1)	0.408105	0.338755
GstE11		Q7JVZ8	Q7JVZ8	Dorsal (1)	-0.274983	-0.253546
		Q7JW07	Q7JW07	Dorsal (1)	-0.584365	-0.534312
Atg7		Q7JY94;A1ZBA9	Q7JY94;A1ZBA9	Dorsal (1)	0.31436	0.360993
Hen1	Small RNA 2-O-methyltransferase	Q7K175	Q7K175	Dorsal (1)	-0.965789	-0.850159
CG10265-RB		Q7K2K2;A0A0C4DHG4	Q7K2K2;A0A0C4DHG4	Dorsal (1)	0.472365	0.566482
Pi3K68D		Q7K3H0	Q7K3H0	Dorsal (1)	0.390835	0.334581
CG5721	Armadillo repeat-containing protein 6 homolog	Q7K486	Q7K486	Dorsal (1)	0.284972	0.376702
CG6550	Threonylcarbamoyladenosine tRNA methylthiotransferase	Q7K4W1	Q7K4W1	Dorsal (1)	0.193706	0.230538
Gpo-1	Glycerol-3-phosphate dehydrogenase	Q7K569	Q7K569	Dorsal (1)	-0.864543	-0.974233
Pten		Q9V3L4;Q7KMQ6;Q9Y0B6	Q9V3L4;Q7KMQ6;Q9Y0B6	Dorsal (1)	0.436697	0.502862
sea		Q7KSQ0	Q7KSQ0	Dorsal (1)	0.411646	0.43489
Apoltp		Q7KTG2	Q7KTG2	Dorsal (1)	0.499634	0.523328
CG33228-RA		Q7KVF6	Q7KVF6	Dorsal (1)	0.578814	0.640263
Trf4-1		Q7KVS9	Q7KVS9	Dorsal (1)	0.501454	0.513012
		Q7KW09;Q9W554	Q7KW09;Q9W554	Dorsal (1)	0.428014	0.428936
Nipped-B	Nipped-B protein	Q7PLI2;E1JGX3;A0A0B4KF23	Q7PLI2;E1JGX3;A0A0B4KF23	Dorsal (1)	0.279308	0.339605
CG33172-RA		Q86B53	Q86B53	Dorsal (1)	0.370695	0.363003
		Q8I050	Q8I050	Dorsal (1)	-0.526544	-0.57147
CG31320	Dynein assembly factor 5, axonemal	Q8INF7	Q8INF7	Dorsal (1)	0.329716	0.366696
scramb1		Q8IQD7;Q8IQD8;Q9VT88	Q8IQD7;Q8IQD8;Q9VT88	Dorsal (1)	0.463712	0.390347
thoc7	THO complex protein 7	Q8IRJ8	Q8IRJ8	Dorsal (1)	0.164268	0.246889
CG3038-RB;EG:BACR37P7.1		Q8IRZ0;Q95RP8;X2JD78	Q8IRZ0;Q95RP8;X2JD78	Dorsal (1)	0.420139	0.386244
		Q8MS38	Q8MS38	Dorsal (1)	0.397799	0.475645
Mes-4	Probable histone-lysine N-methyltransferase Mes-4;Histone-lysine N-methyltransferase	Q8MT36;A0A0B4KHR6	Q8MT36;A0A0B4KHR6	Dorsal (1)	0.306582	0.219965
conu		Q8T0G4	Q8T0G4	Dorsal (1)	0.612248	0.615884
		Q8T481	Q8T481	Dorsal (1)	-0.470935	-0.434306
Rrp45		Q8T4A9	Q8T4A9	Dorsal (1)	0.289853	0.291802
Alg10	Putative Dol-P-Glc:Glc(2)Man(9)GlcNAc(2)-PP-Dol alpha-1,2-glucosyltransferase	Q8T8L8	Q8T8L8	Dorsal (1)	-0.855044	-0.878663
Pvf1		Q9BLX1;Q9VWP6;X2JCH3	Q9BLX1;Q9VWP6;X2JCH3	Dorsal (1)	NaN	-0.565065
Ku80	ATP-dependent DNA helicase II subunit 2	Q9I7M8	Q9I7M8	Dorsal (1)	0.292197	0.299798
Myt1	Membrane-associated tyrosine- and threonine-specific cdc2-inhibitory kinase	Q9NI63	Q9NI63	Dorsal (1)	0.332205	0.261663
ECSIT	Evolutionarily conserved signaling intermediate in Toll pathway, mitochondrial	Q9U6M0	Q9U6M0	Dorsal (1)	0.365601	0.275053
Catsup	Protein catecholamines up	Q9V3A4	Q9V3A4	Dorsal (1)	-1.04806	-0.904938
RecQ5		Q9V433;Q59E27;Q7YZ98	Q9V433;Q59E27;Q7YZ98	Dorsal (1)	0.345106	0.494269
Kr-h2	Krueppel homolog 2	X2J4W8;Q9V447	X2J4W8;Q9V447	Dorsal (1)	-0.639921	-0.62112
Kap-alpha3	Importin subunit alpha	Q9V455	Q9V455	Dorsal (1)	0.487902	0.451699
Eph	Receptor protein-tyrosine kinase	Q9V4E5;Q8IMC2;Q0KIF4;D1YSF9;Q59DQ4	Q9V4E5;Q8IMC2;Q0KIF4;D1YSF9;Q59DQ4	Dorsal (1)	0.104346	0.246378
CG7598	Probable complex I intermediate-associated protein 30, mitochondrial	Q9VAI1	Q9VAI1	Dorsal (1)	0.291272	0.308834
PQBP1		Q9VBY6	Q9VBY6	Dorsal (1)	0.248796	0.25351
Ppox		Q9VC52	Q9VC52	Dorsal (1)	0.460077	0.454987
Dph5		Q9VCY2	Q9VCY2	Dorsal (1)	0.153877	0.146421
Usp8	Ubiquitin carboxyl-terminal hydrolase	Q9VDD8	Q9VDD8	Dorsal (1)	0.577022	0.573021
CG15922-RA		Q9VDL5	Q9VDL5	Dorsal (1)	0.530698	0.605698
		Q9VE58	Q9VE58	Dorsal (1)	-0.23215	-0.150424
CG7687		Q9VE69;Q8MQJ5;A0A0B4KGF5	Q9VE69;Q8MQJ5;A0A0B4KGF5	Dorsal (1)	0.507257	0.512857
		Q9VEF0	Q9VEF0	Dorsal (1)	0.433898	0.469076
CREG		Q9VEK7;Q8IN97	Q9VEK7;Q8IN97	Dorsal (1)	0.411821	0.297549
		Q9VET3	Q9VET3	Dorsal (1)	-0.413662	-0.506171
Sra-1	Cytoplasmic FMR1-interacting protein	Q9VF87	Q9VF87	Dorsal (1)	0.236932	0.236864
omd		Q9VFS6	Q9VFS6	Dorsal (1)	0.338531	0.405761
Dtg		Q9VG45	Q9VG45	Dorsal (1)	0.0658189	0.137532
		Q9VG60	Q9VG60	Dorsal (1)	0.332977	0.417123
		Q9VG81	Q9VG81	Dorsal (1)	0.376148	0.306723
GC1		Q9VGF7	Q9VGF7	Dorsal (1)	0.350903	0.351677
fabp		Q9VGM2;Q8INK3;Q8INK2	Q9VGM2;Q8INK3;Q8INK2	Dorsal (1)	-0.560597	-0.549097
KP78a		Q9VGP9	Q9VGP9	Dorsal (1)	0.24585	0.253443
Ugt86Da		Q9VGT3	Q9VGT3	Dorsal (1)	-0.480179	-0.511249
		Q9VH13	Q9VH13	Dorsal (1)	-0.358536	-0.381441
		Q9VH37	Q9VH37	Dorsal (1)	-0.741344	-0.746716
	Mannose-6-phosphate isomerase	Q9VH77	Q9VH77	Dorsal (1)	-0.415013	-0.413277
Vps45		Q9VHB5	Q9VHB5	Dorsal (1)	0.304237	0.307173
trmt44	Probable tRNA (uracil-O(2)-)-methyltransferase	Q9VHB9	Q9VHB9	Dorsal (1)	0.56028	0.606126
CG1234	Nucleolar complex protein 3 homolog	Q9VI82	Q9VI82	Dorsal (1)	0.379641	0.490434
CG7200	JmjC domain-containing protein 4 homolog	X2JEJ1;Q9VJ97	X2JEJ1;Q9VJ97	Dorsal (1)	0.320138	0.399222
RpL24	60S ribosomal protein L24	X2JE06;Q9VJY6	X2JE06;Q9VJY6	Dorsal (1)	-0.682175	-0.633382
CG17118		Q9VKR2	Q9VKR2	Dorsal (1)	-0.597482	-0.604415
		Q9VKU5	Q9VKU5	Dorsal (1)	0.473465	0.476508
Grip75	Gamma-tubulin complex component 4 homolog	Q9VKU7	Q9VKU7	Dorsal (1)	0.319402	0.308139
RfC3		Q9VKW3	Q9VKW3	Dorsal (1)	0.337842	0.353047
CG4972-RA	Nicalin	Q9VKZ7	Q9VKZ7	Dorsal (1)	0.182082	0.260323
		Q9VLM7	Q9VLM7	Dorsal (1)	0.347563	0.434697
CG7787	Guanine nucleotide exchange factor MSS4 homolog	Q9VLP3	Q9VLP3	Dorsal (1)	0.249342	0.237889
mon2	Protein MON2 homolog	X2J564;Q9VLT1	X2J564;Q9VLT1	Dorsal (1)	0.418115	0.495279
		X2JDI9;Q9VLU3	X2JDI9;Q9VLU3	Dorsal (1)	-0.624344	-0.862507
CG5181	SOSS complex subunit B homolog	Q9VM17	Q9VM17	Dorsal (1)	0.467107	0.495055
Fbw5		Q9VMI1	Q9VMI1	Dorsal (1)	0.196713	0.317994
CG3792	Mannose-P-dolichol utilization defect 1 protein homolog	Q9VMW8	Q9VMW8	Dorsal (1)	-0.685928	-0.806174
DhpD		Q9VMY9	Q9VMY9	Dorsal (1)	0.301709	0.323014
P5CDh1		Q9VNX4	Q9VNX4	Dorsal (1)	0.380807	0.410359
Ipk2		Q9VPR6	Q9VPR6	Dorsal (1)	0.406878	0.419315
CG17593-RA		Q9VQR9	Q9VQR9	Dorsal (1)	0.124325	0.199788
Trn		Q9VRV8	Q9VRV8	Dorsal (1)	0.348971	0.365911
PCID2	PCI domain-containing protein 2 homolog	Q9VTL1	Q9VTL1	Dorsal (1)	0.353832	0.444013
		Q9VTW1;X2JB05;Q9VTW0;X2JGL7	Q9VTW1;X2JB05;Q9VTW0;X2JGL7	Dorsal (1)	0.288339	0.393347
		Q9VVA9	Q9VVA9	Dorsal (1)	0.140882	0.156291
Grasp65		Q9VW57	Q9VW57	Dorsal (1)	0.314553	0.324908
		Q9VW84	Q9VW84	Dorsal (1)	-0.445204	-0.350071
CG7889-RA		Q9VWJ9	Q9VWJ9	Dorsal (1)	0.346529	0.303336
		Q9VX87	Q9VX87	Dorsal (1)	NaN	-0.801107
CG9917-RA		Q9VXH7	Q9VXH7	Dorsal (1)	0.46303	0.447191
		Q9VXV4	Q9VXV4	Dorsal (1)	0.116984	0.2612
Scamp		Q9VXV6	Q9VXV6	Dorsal (1)	0.246954	0.199626
l(1)G0007		Q9VY54;Q9VY50	Q9VY54	Dorsal (1)	0.377116	0.384769
AMPdeam		Q9VY76;Q76NR0;M9NDW2	Q9VY76;Q76NR0	Dorsal (1)	0.39396	0.294838
		Q9VZ34	Q9VZ34	Dorsal (1)	0.168537	0.264056
Imp		Q9VZ69	Q9VZ69	Dorsal (1)	-0.529622	-0.581182
		Q9VZX8	Q9VZX8	Dorsal (1)	-0.661123	-0.585985
RpL23A		Q9W0A8	Q9W0A8	Dorsal (1)	-0.629951	-0.619503
		Q9W0E2	Q9W0E2	Dorsal (1)	0.45973	0.398747
gek	Serine/threonine-protein kinase Genghis Khan	Q9W1B0	Q9W1B0	Dorsal (1)	0.29593	0.379694
BTBD9		Q9W2S3	Q9W2S3	Dorsal (1)	0.257	0.319851
CG2974	NAD(P)H-hydrate epimerase	Q9W2Y3	Q9W2Y3	Dorsal (1)	0.197785	0.211177
		Q9W3C8	Q9W3C8	Dorsal (1)	0.430519	0.336095
		Q9W3J9	Q9W3J9	Dorsal (1)	-0.607334	-0.594876
CG32736	Small integral membrane protein 4	Q9W3T5	Q9W3T5	Dorsal (1)	0.175776	0.0171798
		Q9W3X3	Q9W3X3	Dorsal (1)	0.342262	0.476422
lin-52		Q9W482	Q9W482	Dorsal (1)	0.60395	0.57672
EG:67A9.2		Q9W526	Q9W526	Dorsal (1)	-0.506234	-0.442538
		Q9W5T4;A0A0B4LFP2	Q9W5T4;A0A0B4LFP2	Dorsal (1)	0.243973	0.253065
CG43867	Uncharacterized protein CG43867	X2JDC1;Q9W5D0	X2JDC1;Q9W5D0	Dorsal (1)	-1.13432	-1.13303
Nc	Caspase Nc;Caspase Nc subunit 1;Caspase Nc subunit 2	Q9XYF4	Q9XYF4	Dorsal (1)	0.371634	0.468216
BEST:CK01296		Q9VL69	Q9VL69	Dorsal (1)	0.329182	0.418882
		Q9VKM8	Q9VKM8	Dorsal (1)	0.159969	0.420965
CG18094-RA		Q9VIV5	Q9VIV5	Dorsal (1)	NaN	0.808931
CG10189	Cytoplasmic tRNA 2-thiolation protein 2	Q9VIV3	Q9VIV3	Dorsal (1)	0.32553	0.448831
CG14883-RA		Q9VEU9	Q9VEU9	Dorsal (1)	0.169242	0.304032
jnj		Q9VCB8	Q9VCB8	Dorsal (1)	0.289957	0.388823
ca		Q9VAG5	Q9VAG5	Dorsal (1)	0.0821248	0.215401
Src42A	Tyrosine-protein kinase Src42A	Q9V9J3	Q9V9J3	Dorsal (1)	0.284958	0.441592
Taz	Tafazzin homolog	Q9V6G5;A0A0B4JD45	Q9V6G5;A0A0B4JD45	Dorsal (1)	0.158305	0.333333
		Q8T007;Q9VGL7	Q8T007;Q9VGL7	Dorsal (1)	0.160067	0.291856
		Q8SX81	Q8SX81	Dorsal (1)	0.343457	0.476801
		Q7JWI7	Q7JWI7	Dorsal (1)	NaN	0.264448
mRpL52	39S ribosomal protein L52, mitochondrial	Q7JWG9	Q7JWG9	Dorsal (1)	0.317412	0.42434
		Q4V604	Q4V604	Dorsal (1)	NaN	0.399904
betaggt-I		Q24173;M9PEL6	Q24173;M9PEL6	Dorsal (1)	0.0842098	0.218983
smid		P91638	P91638	Dorsal (1)	0.284987	0.342001
klar		M9PGK7;Q7YU15;Q9W0Q4;A8JNH2;M9PBH0;X2J8G9;M9PDJ0;X2JAH4;A8JNH1	M9PGK7;Q7YU15;Q9W0Q4;A8JNH2	Dorsal (1)	0.116732	0.352342
Vap-33B		Q9VRR4;Q8I935;M9PBR6;Q8I934	Q9VRR4;Q8I935;M9PBR6;Q8I934	Dorsal (1)	0.298591	0.524366
l(2)35Bc	tRNA(His) guanylyltransferase;Probable tRNA(His) guanylyltransferase	M9MSI6;Q9V3N8	M9MSI6;Q9V3N8	Dorsal (1)	NaN	0.471193
CG2162-RB		E1JIB4;Q9VZW2;Q8MRH9	E1JIB4;Q9VZW2;Q8MRH9	Dorsal (1)	0.135413	0.187522
CG8920-RD;CG8920-RC		E1JGN5;Q0E910;Q7KN83;D5AEP3	E1JGN5;Q0E910;Q7KN83;D5AEP3	Dorsal (1)	NaN	0.410525
		A0A126GUX4	A0A126GUX4	Dorsal (1)	0.219429	0.225729
Atg9		Q7JQL5;A0A0B4KF86	Q7JQL5;A0A0B4KF86	Dorsal (1)	0.0388278	0.258226
cnc	Segmentation protein capncollar	A0A0B4K6Z0;A0A0B4K6G8;A0A0B4KGT0;A0A0B4K6E1;A0A0B4KHP5;P20482	A0A0B4K6Z0;A0A0B4K6G8;A0A0B4KGT0;A0A0B4K6E1;A0A0B4KHP5;P20482	Dorsal (1)	NaN	0.416671
Fibp		Q9VW45;M9PFY4	Q9VW45	Dorsal (1)	0.110634	0.327523
pgant3	Polypeptide N-acetylgalactosaminyltransferase 3	Q9Y117	Q9Y117	Dorsal (1)	0.551367	0.634595
Syx1A	Syntaxin-1A	A0A126GV04;A0A0B4JCZ4;Q24547	A0A126GV04;A0A0B4JCZ4;Q24547	Dorsal (1)	0.237356	0.321493
CG9603	Probable cytochrome c oxidase subunit 7A, mitochondrial	A0A0B4K6C3;Q9VHS2	A0A0B4K6C3;Q9VHS2	Lateral (2)	-0.443554	-0.441264
Adk1		Q9VTV3;Q8IQG9	Q9VTV3;Q8IQG9	Lateral (2)	-0.574724	-0.656083
Gcn5		Q9VTZ1	Q9VTZ1	Lateral (2)	0.393806	0.449219
		Q9VUI8;M9NE98	Q9VUI8;M9NE98	Lateral (2)	-0.469026	-0.471097
		Q9VUR2	Q9VUR2	Lateral (2)	0.273454	0.3352
		Q9VV47	Q9VV47	Lateral (2)	-0.703125	-0.789562
rogdi	Protein rogdi	Q9VVE2	Q9VVE2	Lateral (2)	0.280428	0.267667
MED11	Mediator of RNA polymerase II transcription subunit 11	Q9VVS4	Q9VVS4	Lateral (2)	0.318504	0.280009
CG15047-RA		Q9VWS7	Q9VWS7	Lateral (2)	-0.391443	-0.351759
baz		Q9VX75;X2JFU8;X2JCB3;Q0KHR3	Q9VX75;X2JFU8;X2JCB3;Q0KHR3	Lateral (2)	0.438081	0.368975
Pdcd4		Q9VY91	Q9VY91	Lateral (2)	0.450204	0.446081
Kmn1		Q9VYX4	Q9VYX4	Lateral (2)	-0.654431	-0.533328
		Q9VZC8	Q9VZC8	Lateral (2)	-0.157479	-0.128903
Chd64	Transgelin	Q9VZI1;M9PE30	Q9VZI1;M9PE30	Lateral (2)	-0.704168	-0.650205
mRpL46		Q9W086	Q9W086	Lateral (2)	0.339177	0.383611
msd1		Q9W0G7	Q9W0G7	Lateral (2)	0.434057	0.410268
		Q9W0M4	Q9W0M4	Lateral (2)	0.246288	0.219132
BcDNA:GH03108		Q9W0X8	Q9W0X8	Lateral (2)	0.136768	0.198184
		Q9W112	Q9W112	Lateral (2)	0.367621	0.354392
ND-19		Q9W125	Q9W125	Lateral (2)	0.332263	0.274748
uri		Q9W148	Q9W148	Lateral (2)	0.396786	0.405221
shu	Inactive peptidyl-prolyl cis-trans isomerase shutdown	Q9W1I9	Q9W1I9	Lateral (2)	-0.657087	-0.535689
mi		Q9W1N8	Q9W1N8	Lateral (2)	0.295965	0.379984
GM130		Q9W289	Q9W289	Lateral (2)	0.554629	0.533406
		Q9W298	Q9W298	Lateral (2)	0.4386	0.424817
Tim10	Mitochondrial import inner membrane translocase subunit Tim10	Q9W2D6	Q9W2D6	Lateral (2)	0.284727	0.287596
Sgf29		Q9W2I4	Q9W2I4	Lateral (2)	0.404044	0.349054
Atg8a		Q9W2S2;X2JJA8;X2JEE0	Q9W2S2	Lateral (2)	0.33172	0.428501
		Q9W333	Q9W333	Lateral (2)	0.0906105	0.108024
c12.2		Q9W347;M9PHH0	Q9W347;M9PHH0	Lateral (2)	0.396759	0.351968
fh	Frataxin homolog, mitochondrial	Q9W385	Q9W385	Lateral (2)	0.415528	0.399251
CG1785	Uncharacterized protein CG1785	Q9W3C2	Q9W3C2	Lateral (2)	0.12487	0.0818172
		X2JEI6;Q9W3G7	X2JEI6;Q9W3G7	Lateral (2)	-0.600702	-0.670886
		Q9W3S3	Q9W3S3	Lateral (2)	0.508359	0.480946
		Q9W3Y3	Q9W3Y3	Lateral (2)	0.284876	0.330364
Pp2C1		Q9W4H8	Q9W4H8	Lateral (2)	0.522621	0.470805
temp		Q9W501	Q9W501	Lateral (2)	0.197462	0.140132
EG:17E2.1		Q9W511	Q9W511	Lateral (2)	0.687208	0.703264
TRAM	Translocating chain-associated membrane protein	Q9W5C2	Q9W5C2	Lateral (2)	NaN	-0.493751
MED21	Mediator of RNA polymerase II transcription subunit 21	Q9W5P1	Q9W5P1	Lateral (2)	0.334534	0.275324
mre11		Q9XYZ4	Q9XYZ4	Lateral (2)	0.365564	0.409126
		Q9XZ22	Q9XZ22	Lateral (2)	0.21146	0.231708
danr	Protein distal antenna-related	Q9VBW9	Q9VBW9	Lateral (2)	NaN	0.159006
		Q9VC66	Q9VC66	Lateral (2)	0.477415	0.530194
		Q9VCV3	Q9VCV3	Lateral (2)	-0.465294	-0.444739
		Q9VD02	Q9VD02	Lateral (2)	0.453363	0.548183
		Q9VD14	Q9VD14	Lateral (2)	0.308662	0.362727
Naam		Q9VDU7	Q9VDU7	Lateral (2)	0.163897	0.242936
cib		O97428;Q8IRS7	O97428;Q8IRS7	Lateral (2)	-0.318278	-0.29372
CG11779-RB	Mitochondrial import inner membrane translocase subunit TIM44	Q9VDZ8;Q9VDZ7	Q9VDZ8;Q9VDZ7	Lateral (2)	0.444949	0.480673
		Q9VE12	Q9VE12	Lateral (2)	0.369173	0.364909
Snx3		Q9VG51	Q9VG51	Lateral (2)	-0.489072	-0.484892
Spt3		Q9VGE2	Q9VGE2	Lateral (2)	0.245897	0.252942
		Q9VGY8	Q9VGY8	Lateral (2)	-0.882237	-0.888206
		Q9VH00	Q9VH00	Lateral (2)	0.522042	0.536034
E(var)3-9		Q9VHJ3	Q9VHJ3	Lateral (2)	0.379159	0.457918
Yp2	Vitellogenin-2	X2JB25;P02844	X2JB25;P02844	Lateral (2)	-0.431607	-0.424866
Atg13	Autophagy-related protein 13 homolog	Q9VHR6	Q9VHR6	Lateral (2)	0.635018	0.671516
Taf13		Q9VIP1	Q9VIP1	Lateral (2)	-0.723045	-0.885709
Nedd8	NEDD8	X2J935;Q9VJ33	X2J935;Q9VJ33	Lateral (2)	-0.466018	-0.541272
		Q9VK20	Q9VK20	Lateral (2)	0.157007	0.0707401
YL-1	Vacuolar protein sorting-associated protein 72 homolog	X2JA36;Q9VKM6	X2JA36;Q9VKM6	Lateral (2)	0.378755	0.285114
		Q9VKP5	Q9VKP5	Lateral (2)	0.432539	0.424245
CG4968	Ubiquitin thioesterase otubain-like	Q9VL00	Q9VL00	Lateral (2)	0.345399	0.325931
RpLP2	60S acidic ribosomal protein P2	P05389	P05389	Lateral (2)	-0.457167	-0.611779
fu2		Q9VLK8	Q9VLK8	Lateral (2)	0.174389	0.167745
Yp3	Vitellogenin-3	X2JEX8;P06607;Q4V566;Q9VPH3;M9NFL7	X2JEX8;P06607	Lateral (2)	-0.378944	-0.357113
CG12375	Beta-lactamase-like protein 2 homolog	Q9VLS9	Q9VLS9	Lateral (2)	0.436389	0.403436
ci	Transcriptional activator cubitus interruptus;Transcriptional repressor cubitus interruptus	P19538;H9XVL7;H9XVL6;A0A0B4KEP0;A0A0B4KGM2;Q962I0;Q7K0S9	P19538;H9XVL7	Lateral (2)	0.561191	0.540488
SmE	Probable small nuclear ribonucleoprotein E	Q9VLV5	Q9VLV5	Lateral (2)	-0.433578	-0.408606
Rab30		Q9VM50	Q9VM50	Lateral (2)	0.42665	0.519622
Gas41		Q9VM63	Q9VM63	Lateral (2)	0.19352	0.230349
		Q9VMB3	Q9VMB3	Lateral (2)	-1.02735	-1.10107
COX5B		Q9VMB9	Q9VMB9	Lateral (2)	-0.561716	-0.584355
CG12512-RA		Q9VMR6	Q9VMR6	Lateral (2)	0.397332	0.430336
		Q9VNB2	Q9VNB2	Lateral (2)	0.295731	0.162395
Snm1		Q9VND2	Q9VND2	Lateral (2)	-0.445455	-0.403311
Hsc70-2	Heat shock 70 kDa protein cognate 2	P11146	P11146	Lateral (2)	NaN	-0.637647
		Q9VNE8	Q9VNE8	Lateral (2)	0.311098	0.45917
Als2		Q9VNZ8	Q9VNZ8	Lateral (2)	0.350458	0.28426
CG5199-RA		Q9VPF1	Q9VPF1	Lateral (2)	0.270841	0.223822
mRpL48		Q9VQ35	Q9VQ35	Lateral (2)	0.248743	0.266339
Bacc		Q9VQF7	Q9VQF7	Lateral (2)	-0.889651	-0.740524
snapin	SNAPIN protein homolog	Q9VQF9	Q9VQF9	Lateral (2)	0.403657	0.313302
GstD1	Glutathione S-transferase 1-1	P20432	P20432	Lateral (2)	-1.05444	-1.16412
		Q9VR62	Q9VR62	Lateral (2)	0.373916	0.367772
sca	Protein scabrous	P21520	P21520	Lateral (2)	-0.292231	-0.456182
aay	Phosphoserine phosphatase	Q9VSY6	Q9VSY6	Lateral (2)	-0.728528	-0.678145
		Q9VSZ2	Q9VSZ2	Lateral (2)	0.642093	0.686784
		Q9VBI0	Q9VBI0	Lateral (2)	0.488116	0.430509
		Q9VB51	Q9VB51	Lateral (2)	-0.763658	-0.782234
CG5098	Uncharacterized protein CG5098	A0A126GUN5;A0A0B4KFU8;Q6AWG9	A0A126GUN5;A0A0B4KFU8;Q6AWG9	Lateral (2)	0.28662	0.331412
Vps28	Vacuolar protein sorting-associated protein 28 homolog	A0A0B4KF05;Q9V359	A0A0B4KF05;Q9V359	Lateral (2)	0.426603	0.370134
Sur-8	Leucine-rich repeat protein soc-2 homolog	A0A0B4KHN4;A0A0B4KHA2;Q9VEK6	A0A0B4KHN4;A0A0B4KHA2;Q9VEK6	Lateral (2)	0.133587	0.25239
CG12259	Protein FAM50 homolog	Q9VAY7	Q9VAY7	Lateral (2)	0.366937	0.389417
CG11880	CTL-like protein 2	Q9VAP3	Q9VAP3	Lateral (2)	0.377983	0.303913
swa	Protein swallow	P40688	P40688	Lateral (2)	0.654632	0.581241
Hsf	Heat shock factor protein	Q4H2F8;Q4H2F9;Q4H2F7;P22813	Q4H2F8;Q4H2F9;Q4H2F7;P22813	Lateral (2)	0.287821	0.342299
E(Pc)	Enhancer of polycomb-like protein	A0A0B4KEK1;Q0E9C2;A0A0B4KET9;A0A0B4KFP2	A0A0B4KEK1;Q0E9C2;A0A0B4KET9;A0A0B4KFP2	Lateral (2)	-0.600281	-0.635166
pr	6-pyruvoyl tetrahydrobiopterin synthase	P48611	P48611	Lateral (2)	-0.543835	-0.527717
		Q9VAB8	Q9VAB8	Lateral (2)	-0.767334	-0.633108
CanB2;CanB	Calcineurin subunit B type 2;Calcineurin subunit B type 1	A0A0B4K833;Q24214;M9NFW6;P48451	A0A0B4K833;Q24214;M9NFW6;P48451	Lateral (2)	0.169047	0.233719
		Q0E8X8	Q0E8X8	Lateral (2)	0.367512	0.406427
Drak	Death-associated protein kinase related	Q0KHT7	Q0KHT7	Lateral (2)	0.0867066	0.172573
		Q0KI15	Q0KI15	Lateral (2)	0.379995	0.455464
ND-B14.5A		O97418	O97418	Lateral (2)	-0.207027	-0.214327
unk	RING finger protein unkempt	A0A0B4K6Y4;Q86B79	A0A0B4K6Y4;Q86B79	Lateral (2)	0.251027	0.318466
Oscp	ATP synthase subunit O, mitochondrial	Q24439	Q24439	Lateral (2)	0.106286	0.182561
CG1542	Probable rRNA-processing protein EBP2 homolog	Q9V9Z9	Q9V9Z9	Lateral (2)	0.517676	0.552667
CG33977-RA		Q2PDR0	Q2PDR0	Lateral (2)	-0.681068	-0.575619
		Q4V4H7	Q4V4H7	Lateral (2)	0.328141	0.375247
mRpL32	39S ribosomal protein L32, mitochondrial	Q9V9Z1	Q9V9Z1	Lateral (2)	-0.453815	-0.356751
		Q9VTB3	Q9VTB3	Lateral (2)	0.463913	0.484732
pallidin	Biogenesis of lysosome-related organelles complex 1 subunit 6	Q9VTM0	Q9VTM0	Lateral (2)	0.263166	0.283787
Meltrin		Q6QU65;Q400M8	Q6QU65;Q400M8	Lateral (2)	0.151454	0.284694
Orc6	Origin recognition complex subunit 6	Q9Y1B2	Q9Y1B2	Lateral (2)	0.453349	0.449882
FeCh	Ferrochelatase, mitochondrial	Q9V9S8	Q9V9S8	Lateral (2)	0.351659	0.368122
sPLA2		Q6XPX3;Q8SZB2	Q6XPX3;Q8SZB2	Lateral (2)	0.173058	0.169307
		Q7JUN9	Q7JUN9	Lateral (2)	-0.910628	-1.04326
kermit		Q7JX82	Q7JX82	Lateral (2)	-0.145323	-0.0702932
		Q7K0D3	Q7K0D3	Lateral (2)	0.275602	0.187345
CG7686	Protein LTV1 homolog	A0A0B4LF59;Q7KN79	A0A0B4LF59;Q7KN79	Lateral (2)	0.278923	0.318277
MESR4		A0A0B4LGV3;A0A0B4LFV9;A1ZAV3	A0A0B4LGV3;A0A0B4LFV9;A1ZAV3	Lateral (2)	0.580689	0.636474
Galphas	G protein alpha s subunit	A0A0B4LGI1;P20354	A0A0B4LGI1;P20354	Lateral (2)	0.34649	0.268698
Vps13		A1Z713	A1Z713	Lateral (2)	0.427042	0.458876
		A1ZAY5	A1ZAY5	Lateral (2)	-0.55377	-0.566467
DIP1		Q8MRC7;Q9W5S7;Q9U4F5;A4V4V2;Q9TW27;Q9TW12	Q8MRC7;Q9W5S7;Q9U4F5;A4V4V2;Q9TW27;Q9TW12	Lateral (2)	0.589395	0.592463
ND-MWFE		A8DYC5;A8DYC4	A8DYC5;A8DYC4	Lateral (2)	0.69504	0.66885
lqf		M9PEM7;M9PBU6;A8JNM3;Q7KU93;M9PEF2;Q7KU90;Q9VS85	M9PEM7;M9PBU6;A8JNM3;Q7KU93;M9PEF2;Q7KU90;Q9VS85	Lateral (2)	0.509447	0.493596
drongo		B7Z005;Q9VPU3;E1JHR0;Q8MRM4;E1JHR1	B7Z005;Q9VPU3;E1JHR0;Q8MRM4;E1JHR1	Lateral (2)	NaN	-0.606409
Ald-RC;Ald	Fructose-bisphosphate aldolase	C8VV14;P07764	C8VV14;P07764	Lateral (2)	-0.476905	-0.531983
CG7115-RB		D8FT19;M9PCH3;Q9XZ28	D8FT19;M9PCH3;Q9XZ28	Lateral (2)	0.23253	0.355117
		Q961C3;Q9VH75;E1JIH4	Q961C3;Q9VH75;E1JIH4	Lateral (2)	0.400762	0.401211
bin3	Probable RNA methyltransferase bin3	E2QC61;Q7K480	E2QC61;Q7K480	Lateral (2)	0.698423	0.669215
RpS3	40S ribosomal protein S3	G3M3A2;Q06559	G3M3A2;Q06559	Lateral (2)	-0.537531	-0.505761
Pka-R1	cAMP-dependent protein kinase type I regulatory subunit	M9MRY3;P16905;M9MS72;M9MS37;H1UUF3;Q9VPA7;M9MS76	M9MRY3;P16905;M9MS72;M9MS37;H1UUF3;Q9VPA7;M9MS76	Lateral (2)	-0.411118	-0.354687
Wee1;wee	Wee1-like protein kinase	M9PB57;P54350	M9PB57;P54350	Lateral (2)	0.510824	0.478069
		Q0E8S5;M9PCE7;M9PEZ6;M9PCT0	Q0E8S5;M9PCE7;M9PEZ6;M9PCT0	Lateral (2)	NaN	-0.0880079
Usp32	Ubiquitin carboxyl-terminal hydrolase	M9PFQ1;M9PD06;M9PG46;M9PFZ0	M9PFQ1;M9PD06;M9PG46;M9PFZ0	Lateral (2)	0.415735	0.523447
RanGAP		M9PD65	M9PD65	Lateral (2)	NaN	-0.231804
		M9PES8	M9PES8	Lateral (2)	0.370558	0.432261
CG9705	Cold shock domain-containing protein CG9705	M9PFS8;Q9VVA0	M9PFS8;Q9VVA0	Lateral (2)	0.440354	0.511511
sog	Dorsal-ventral patterning protein Sog	M9PH73;Q24025	M9PH73;Q24025	Lateral (2)	0.190668	0.188351
Vinc	Vinculin	X2JAB9;O46037	X2JAB9;O46037	Lateral (2)	0.442668	0.45462
bcn92	Protein bcn92	O46098	O46098	Lateral (2)	0.413169	0.49075
RpL10Ab	60S ribosomal protein L10a-2	Q9VTP4	Q9VTP4	Lateral (2)	-0.493313	-0.442283
Tpi	Triosephosphate isomerase	P29613	P29613	Lateral (2)	-0.444035	-0.471432
Pex5		Q7KW08;O46085	Q7KW08;O46085	Lateral (2)	0.208461	0.236726
qkr58E-3		O44434	O44434	Lateral (2)	0.247827	0.263206
Mkp3	Dual specificity protein phosphatase;Dual specificity protein phosphatase Mpk3	M9PFW0;M9PG13;Q9VVW5	M9PFW0;M9PG13;Q9VVW5	Lateral (2)	0.724654	0.670696
fz	Frizzled	M9PFL6;P18537	M9PFL6;P18537	Lateral (2)	0.285484	0.254785
RpS21	40S ribosomal protein S21	M9PEA6;O76927	M9PEA6;O76927	Lateral (2)	-0.477183	-0.48077
spict		Q9VK62;M9PD12	Q9VK62;M9PD12	Lateral (2)	-1.11289	-0.959367
chico	Insulin receptor substrate 1	M9PCQ8;Q9XTN2	M9PCQ8;Q9XTN2	Lateral (2)	0.189719	0.302589
bib	Neurogenic protein big brain	M9PB86;P23645	M9PB86;P23645	Lateral (2)	0.264512	0.313322
Hsp23	Heat shock protein 23	M9NE68;P02516	M9NE68;P02516	Lateral (2)	-1.24455	-1.03804
Sh3beta	SH3 domain-binding glutamic acid-rich protein homolog	M9MSK4;M9MRQ6;Q9NFP5;M9MRR7	M9MSK4;M9MRQ6;Q9NFP5;M9MRR7	Lateral (2)	0.299835	0.32697
Gs1l		E2QCN9	E2QCN9	Lateral (2)	0.242064	0.243929
ben	Ubiquitin-conjugating enzyme E2 N	E1JJN1;P35128;Q9VJS5	E1JJN1;P35128	Lateral (2)	-0.463437	-0.385682
		E1JGZ3	E1JGZ3	Lateral (2)	0.7177	0.692423
AMPdeam-RJ;AMPdeam		D0IQK3;Q961Q7	D0IQK3;Q961Q7	Lateral (2)	-0.591117	-0.631231
BcDNA:LD21969		Q9VI18;B9A0M7	Q9VI18;B9A0M7	Lateral (2)	0.396073	0.303907
Neu2		B6VQ99;M9PFW2	B6VQ99;M9PFW2	Lateral (2)	-0.156043	-0.138375
		A8DYU2;A8DYU1;A8DYU3;R9PY62;R9PY34;M9NE71	A8DYU2;A8DYU1;A8DYU3;R9PY62;R9PY34	Lateral (2)	0.366009	0.361473
		A8DYB0	A8DYB0	Lateral (2)	0.29565	0.37487
CaMKII		A4V134;A4V133;L0MNA2	A4V134;A4V133;L0MNA2	Lateral (2)	NaN	-0.47771
arr		A1Z9D7	A1Z9D7	Lateral (2)	-0.154395	-0.133517
koi		A1Z6Q0;A4UZ58	A1Z6Q0;A4UZ58	Lateral (2)	-0.381791	-0.401227
	Oxysterol-binding protein	Q9W1D9;A0A0B4LGH8	Q9W1D9;A0A0B4LGH8	Lateral (2)	0.961914	1.00136
CG4646	UPF0587 protein CG4646	A0A0B4LF92;A1Z9A2	A0A0B4LF92;A1Z9A2	Lateral (2)	-0.485013	-0.466025
Cam	Calmodulin	A0A0B4LF57;P62152	A0A0B4LF57;P62152	Lateral (2)	-0.558042	-0.511939
		Q7K0S1;H0RN96	Q7K0S1	Lateral (2)	0.215683	0.153282
mira		A0A0B4KHS3;Q8IN63	A0A0B4KHS3;Q8IN63	Lateral (2)	NaN	-0.57349
Uba3	Nedd8-activating enzyme E1 catalytic subunit	Q9V6U8	Q9V6U8	Lateral (2)	0.188021	0.25101
Ubc10		Q7K738	Q7K738	Lateral (2)	0.477239	0.533434
		Q9VBY5	Q9VBY5	Lateral (2)	0.151551	0.248637
Srp54k		Q9V3D9	Q9V3D9	Lateral (2)	0.323396	0.404144
Gli		Q7KT70	Q7KT70	Lateral (2)	-0.0596856	-0.0419952
		Q7KTG0	Q7KTG0	Lateral (2)	0.305057	0.272754
CG7369-RA		Q7KTU3	Q7KTU3	Lateral (2)	0.271188	0.257443
		Q9I7W2	Q9I7W2	Lateral (2)	0.739136	0.635693
		Q7YU16;Q9VZN0	Q7YU16;Q9VZN0	Lateral (2)	0.374868	0.337028
CG8611	Probable ATP-dependent RNA helicase CG8611	Q86B47;X2JKW3	Q86B47;X2JKW3	Lateral (2)	0.312683	0.305418
Lrch		Q960C5;X2JA56;Q9VJE6	Q960C5;X2JA56;Q9VJE6	Lateral (2)	-0.443379	-0.380812
CG2201-RB		Q9V9R4;Q8IMF4;Q2PDP3;Q8IMF3	Q9V9R4;Q8IMF4;Q2PDP3;Q8IMF3	Lateral (2)	0.356983	0.423046
Galk		Q95U34	Q95U34	Lateral (2)	0.21694	0.255883
		Q95RX5	Q95RX5	Lateral (2)	0.493101	0.485169
CG3426		Q95RP1	Q95RP1	Lateral (2)	0.51175	0.57388
		Q8SY58	Q8SY58	Lateral (2)	-0.607547	-0.610407
dUTPase		Q8IPB1	Q8IPB1	Lateral (2)	-0.600039	-0.624956
		Q8IQM5	Q8IQM5	Lateral (2)	0.496046	0.442559
BigH1		Q8MSC4	Q8MSC4	Lateral (2)	0.311359	0.303487
Nf-YB		Q8ST61	Q8ST61	Lateral (2)	-0.155998	-0.126894
TBPH		Q8SXP8;Q9W1I0	Q8SXP8;Q9W1I0	Lateral (2)	0.388779	0.363186
		Q9VBY9	Q9VBY9	Lateral (2)	0.302743	0.135571
Aatf	Protein Aatf	Q9VM95	Q9VM95	Lateral (2)	0.44007	0.400349
RIOK2		Q9VBU2	Q9VBU2	Lateral (2)	0.28629	0.130846
shark	Tyrosine-protein kinase shark	Q24145	Q24145	Lateral (2)	0.943134	0.8733
veli		Q9VBY7	Q9VBY7	Lateral (2)	0.332944	0.21154
robo2		Q9VQ08;M9PC46	Q9VQ08;M9PC46	Lateral (2)	0.351849	0.262954
sra	Protein sarah	A0A0B4LHI3;Q9XZL8	A0A0B4LHI3;Q9XZL8	Ventral Tl10B (3)	0.0391038	NaN
wdp		Q9W266	Q9W266	Ventral Tl10B (3)	0.12108	NaN
qkr58E-2		Q9W254	Q9W254	Ventral Tl10B (3)	-0.0366314	NaN
pre-mod(mdg4)-E		A0A0B4LHQ9	A0A0B4LHQ9	Ventral Tl10B (3)	-0.157993	NaN
		M9MSJ7;M9PGW2;Q9W081	M9MSJ7	Ventral Tl10B (3)	0.734118	NaN
		M9NF18;Q9VYW5;M9NED4	M9NF18;Q9VYW5;M9NED4	Ventral Tl10B (3)	-0.0858327	NaN
Hakai		Q8INW0;M9PBE2;Q9VIT1;Q8INV9	Q8INW0;M9PBE2;Q9VIT1;Q8INV9	Ventral Tl10B (3)	-0.242099	NaN
Ate1	Arginyl-tRNA--protein transferase 1	O96539	O96539	Ventral Tl10B (3)	0.0873791	NaN
SmB	Small nuclear ribonucleoprotein-associated protein B	Q05856	Q05856	Ventral Tl10B (3)	-0.268029	NaN
Vps25	Vacuolar protein-sorting-associated protein 25	Q7JXV9	Q7JXV9	Ventral Tl10B (3)	0.00454362	NaN
		Q7JYZ0	Q7JYZ0	Ventral Tl10B (3)	0.0221711	NaN
		Q7K5M2;A0A0B4LFE1	Q7K5M2;A0A0B4LFE1	Ventral Tl10B (3)	0.0614745	NaN
Mst85C		Q9V451	Q9V451	Ventral Tl10B (3)	0.463509	NaN
		Q9VBC6	Q9VBC6	Ventral Tl10B (3)	0.724771	NaN
		Q9VEH2	Q9VEH2	Ventral Tl10B (3)	-0.113462	NaN
		Q9VFP5	Q9VFP5	Ventral Tl10B (3)	-0.115835	NaN
Ibf1		Q9VHG5;A0A0B4LGV6	Q9VHG5;A0A0B4LGV6	Ventral Tl10B (3)	0.0079037	NaN
RpL7-like		Q9VKC1	Q9VKC1	Ventral Tl10B (3)	-0.13257	NaN
Syx16		Q9VR90	Q9VR90	Ventral Tl10B (3)	0.26779	NaN
CG13484-RA		Q9VUC4	Q9VUC4	Ventral Tl10B (3)	-0.0836482	NaN
		Q9VUV8	Q9VUV8	Ventral Tl10B (3)	-0.0919417	NaN
Bet1		Q9VVX6	Q9VVX6	Ventral Tl10B (3)	-0.211538	NaN
		Q9VXQ6	Q9VXQ6	Ventral Tl10B (3)	0.0212477	NaN
		X2JG46;Q9W0D2	X2JG46;Q9W0D2	Ventral Tl10B (3)	0.0639733	NaN
l(1)G0320		Q9W335	Q9W335	Ventral Tl10B (3)	0.385086	NaN
CG16892-RA		Q9W351	Q9W351	Ventral Tl10B (3)	0.20297	NaN
		Q9W380	Q9W380	Ventral Tl10B (3)	-1.1397	NaN
Rbm13		Q9W3B2	Q9W3B2	Ventral Tl10B (3)	0.282905	NaN
		Q9W3D5	Q9W3D5	Ventral Tl10B (3)	-0.829088	NaN
CG12125-RB		Q9W3F7	Q9W3F7	Ventral Tl10B (3)	0.155665	NaN
		Q9W3G1	Q9W3G1	Ventral Tl10B (3)	0.420876	NaN
CG17982-RA		Q9W3J6	Q9W3J6	Ventral Tl10B (3)	0.621344	NaN
l(1)G0193		Q9W3M4	Q9W3M4	Ventral Tl10B (3)	-0.323789	NaN
		Q9W3T9	Q9W3T9	Ventral Tl10B (3)	0.356907	NaN
		Q9W3U9;X2JAQ5	Q9W3U9;X2JAQ5	Ventral Tl10B (3)	0.212599	NaN
APC7		Q9W3Y6;Q8IRQ6	Q9W3Y6;Q8IRQ6	Ventral Tl10B (3)	0.0433192	NaN
CG32758-RA		Q9W486;X2JIH1;F3YD98	Q9W486;X2JIH1;F3YD98	Ventral Tl10B (3)	0.292846	NaN
		X2JCL3;Q9W4D1	X2JCL3;Q9W4D1	Ventral Tl10B (3)	0.450857	NaN
		Q9W4J6	Q9W4J6	Ventral Tl10B (3)	0.393665	NaN
CG3626-RA		Q9W4K8	Q9W4K8	Ventral Tl10B (3)	-0.916287	NaN
		Q9W4N6	Q9W4N6	Ventral Tl10B (3)	-0.726399	NaN
Vap-33A		Q9W4N8;Q7KVX5	Q9W4N8;Q7KVX5	Ventral Tl10B (3)	0.415538	NaN
		Q9W4W8	Q9W4W8	Ventral Tl10B (3)	0.285593	NaN
EG:22E5.7		Q9W531	Q9W531	Ventral Tl10B (3)	0.268407	NaN
ebo		Q9W5G1;X2JDN0;X2J9Y4	Q9W5G1;X2JDN0;X2J9Y4	Ventral Tl10B (3)	0.144531	NaN
BcDNA.GH10614		Q9Y112;Q9VZK8	Q9Y112	Ventral Tl10B (3)	-0.668536	NaN
CG7601	Dehydrogenase/reductase SDR family protein 7-like	Q9Y140	Q9Y140	Ventral Tl10B (3)	0.223268	NaN
BcDNA.GH02220		Q9Y171	Q9Y171	Ventral Tl10B (3)	-0.0352553	NaN
sesB	ADP,ATP carrier protein	X2JB48;Q26365	X2JB48;Q26365	Ventral Tl10B (3)	-0.623932	NaN
Nup214	Nuclear pore complex protein Nup214	Q9W1X4	Q9W1X4	Ventral Tl10B (3)	0.378829	NaN
		Q9W281	Q9W281	Ventral Tl10B (3)	0.235741	NaN
Psf3		Q9W2V7	Q9W2V7	Ventral Tl10B (3)	0.376054	NaN
CG3502-RB		Q9W1S1	Q9W1S1	Ventral Tl10B (3)	-0.425688	NaN
DCP1		Q9W1H5	Q9W1H5	Ventral Tl10B (3)	0.151287	NaN
		Q9W158	Q9W158	Ventral Tl10B (3)	0.408822	NaN
CG11414-RA		Q9W149	Q9W149	Ventral Tl10B (3)	0.348524	NaN
Cdc5		Q9W0R0	Q9W0R0	Ventral Tl10B (3)	0.142857	NaN
CG9004	Nucleolar MIF4G domain-containing protein 1 homolog	Q9W020	Q9W020	Ventral Tl10B (3)	0.419379	NaN
Sk2		Q9VZW0	Q9VZW0	Ventral Tl10B (3)	0.124847	NaN
pav	Kinesin-like protein	Q9VZF5	Q9VZF5	Ventral Tl10B (3)	0.238437	NaN
CG2145	Poly(U)-specific endoribonuclease homolog	X2JJD6;Q9VZ49	X2JJD6;Q9VZ49	Ventral Tl10B (3)	0.304001	NaN
		Q9VYW4	Q9VYW4	Ventral Tl10B (3)	0.415226	NaN
Tango4		Q9VYQ9	Q9VYQ9	Ventral Tl10B (3)	0.449015	NaN
CG1622-RA		Q9VYE9;M9PHQ4;X2JF51	Q9VYE9	Ventral Tl10B (3)	-0.445113	NaN
pdgy		Q9VXZ8	Q9VXZ8	Ventral Tl10B (3)	-0.511683	NaN
		Q9VXW9;Q8IR40	Q9VXW9;Q8IR40	Ventral Tl10B (3)	0.387523	NaN
shtd		Q9VXV3	Q9VXV3	Ventral Tl10B (3)	0.250638	NaN
		Q9VXQ3	Q9VXQ3	Ventral Tl10B (3)	-0.450341	NaN
sun		Q9VXN2	Q9VXN2	Ventral Tl10B (3)	-0.903113	NaN
tay		X2JC54;Q9VXM5	X2JC54;Q9VXM5	Ventral Tl10B (3)	0.458251	NaN
mthl1	Probable G-protein coupled receptor Mth-like 1	X2JC86;Q9VXD9	X2JC86;Q9VXD9	Ventral Tl10B (3)	0.26469	NaN
Taf8	Transcription initiation factor TFIID subunit 8	Q9VWY6	Q9VWY6	Ventral Tl10B (3)	0.492402	NaN
Pk17E		Q9VWQ2	Q9VWQ2	Ventral Tl10B (3)	0.26706	NaN
Ulp1		Q9VWK5	Q9VWK5	Ventral Tl10B (3)	0.242642	NaN
HspB8		Q9VWG1;Q8IQW5;M9NHC5	Q9VWG1;Q8IQW5;M9NHC5	Ventral Tl10B (3)	0.244872	NaN
Shawn		Q9VWG0	Q9VWG0	Ventral Tl10B (3)	-0.700584	NaN
NAA20		Q9VWF5;M9PI14	Q9VWF5;M9PI14	Ventral Tl10B (3)	0.299392	NaN
dome	Cytokine receptor	Q9VWE0	Q9VWE0	Ventral Tl10B (3)	0.369326	NaN
Ubqn		Q9VWD9	Q9VWD9	Ventral Tl10B (3)	0.220627	NaN
vfl		Q9VWC6;X2BZL0;M9NES1	Q9VWC6;X2BZL0;M9NES1	Ventral Tl10B (3)	0.14621	NaN
CG7668-RA		Q9VW70	Q9VW70	Ventral Tl10B (3)	0.37268	NaN
Trpml		Q9VW35	Q9VW35	Ventral Tl10B (3)	0.217059	NaN
l(3)76BDm		Q9VW22	Q9VW22	Ventral Tl10B (3)	0.437141	NaN
RpL26		Q9VVU2	Q9VVU2	Ventral Tl10B (3)	-0.0336374	NaN
mRpS26	Probable 28S ribosomal protein S26, mitochondrial	Q9VVN2	Q9VVN2	Ventral Tl10B (3)	0.601028	NaN
		Q9VVG9	Q9VVG9	Ventral Tl10B (3)	0.782997	NaN
CG9951	Coiled-coil domain-containing protein 22 homolog	Q9VVB4	Q9VVB4	Ventral Tl10B (3)	0.161588	NaN
spd-2		Q9VV79	Q9VV79	Ventral Tl10B (3)	0.177522	NaN
PDCD-5		Q9VUZ8	Q9VUZ8	Ventral Tl10B (3)	0.30209	NaN
cmb		Q9VU76;M9PFE5;M9PFI2;Q961X4	Q9VU76;M9PFE5;M9PFI2;Q961X4	Ventral Tl10B (3)	0.463278	NaN
Syx13		Q9VU45	Q9VU45	Ventral Tl10B (3)	0.0919696	NaN
		Q9VTY5	Q9VTY5	Ventral Tl10B (3)	0.448526	NaN
		Q9VTW6	Q9VTW6	Ventral Tl10B (3)	-0.675565	NaN
		Q9VT61	Q9VT61	Ventral Tl10B (3)	0.359593	NaN
		Q9VT38	Q9VT38	Ventral Tl10B (3)	0.271468	NaN
CG3434	Queuine tRNA-ribosyltransferase subunit QTRTD1 homolog	Q9VSZ6	Q9VSZ6	Ventral Tl10B (3)	0.296065	NaN
Bet3		Q9VSY8	Q9VSY8	Ventral Tl10B (3)	-0.0268146	NaN
Klp67A	Kinesin-like protein	Q9VSW5;M9PF35	Q9VSW5;M9PF35	Ventral Tl10B (3)	0.262025	NaN
Tequila		Q9VSU2;E1JI93	Q9VSU2;E1JI93	Ventral Tl10B (3)	-0.96335	NaN
PGRP-SD	Peptidoglycan-recognition protein SD	Q9VS97	Q9VS97	Ventral Tl10B (3)	0.368244	NaN
eco	N-acetyltransferase eco	Q9VS50	Q9VS50	Ventral Tl10B (3)	0.111396	NaN
		Q9VS47	Q9VS47	Ventral Tl10B (3)	-0.796891	NaN
MED4	Mediator of RNA polymerase II transcription subunit 4	Q9VS38	Q9VS38	Ventral Tl10B (3)	0.313373	NaN
		Q9VRA0	Q9VRA0	Ventral Tl10B (3)	0.377759	NaN
l(1)G0196	Inositol hexakisphosphate and diphosphoinositol-pentakisphosphate kinase	X2JEN2;Q9VR59;X2JCY0;X2JG41;X2JGE9;X2JLN4	X2JEN2;Q9VR59;X2JCY0;X2JG41;X2JGE9;X2JLN4	Ventral Tl10B (3)	0.329423	NaN
		Q9VR57;Q8IQ25	Q9VR57;Q8IQ25	Ventral Tl10B (3)	0.164152	NaN
		Q9VQT5	Q9VQT5	Ventral Tl10B (3)	0.184143	NaN
colt	Congested-like trachea protein	Q9VQG4	Q9VQG4	Ventral Tl10B (3)	0.299815	NaN
CG3645-RB		Q9VPM1	Q9VPM1	Ventral Tl10B (3)	0.655853	NaN
Tbc1d15-17		Q9VPL5	Q9VPL5	Ventral Tl10B (3)	0.246456	NaN
		Q9VPF9	Q9VPF9	Ventral Tl10B (3)	0.227271	NaN
		Q9VP52;Q9VP51	Q9VP52;Q9VP51	Ventral Tl10B (3)	0.386327	NaN
		Q9VNR9;M9PDB7	Q9VNR9	Ventral Tl10B (3)	-0.646191	NaN
sec8	Exocyst complex component 4	Q9VNH6	Q9VNH6	Ventral Tl10B (3)	0.419034	NaN
CG2182	Gametogenetin-binding protein 2-like	Q9VNG1	Q9VNG1	Ventral Tl10B (3)	0.293348	NaN
	3-oxoacyl-[acyl-carrier-protein] synthase	Q9VNF5	Q9VNF5	Ventral Tl10B (3)	0.24613	NaN
Hus1-like		Q9VN60	Q9VN60	Ventral Tl10B (3)	-0.638719	NaN
eIF3-S5-1	Eukaryotic translation initiation factor 3 subunit F-1	Q9VN50	Q9VN50	Ventral Tl10B (3)	0.382074	NaN
Fip1		Q9VN31	Q9VN31	Ventral Tl10B (3)	0.386552	NaN
		Q9VMX3	Q9VMX3	Ventral Tl10B (3)	0.263655	NaN
		Q9VMU2	Q9VMU2	Ventral Tl10B (3)	-0.508284	NaN
Ncoa6		Q9VMS2;M9NES4;A8DYV5	Q9VMS2;M9NES4;A8DYV5	Ventral Tl10B (3)	0.339891	NaN
		Q9VMC6	Q9VMC6	Ventral Tl10B (3)	0.159222	NaN
		Q9VM22	Q9VM22	Ventral Tl10B (3)	0.142044	NaN
		Q9VLX2	Q9VLX2	Ventral Tl10B (3)	0.383943	NaN
Herp		Q9VLW9	Q9VLW9	Ventral Tl10B (3)	-0.0647265	NaN
Piezo	Piezo-type mechanosensitive ion channel component	Q9VLS3;M9PB69;M9MRE5;M9PF50;Q0E8L0;E1JHB4;A0A0S0WGQ9;M9PCC7;Q8IPG4;M9PCW8;M9MSG8	Q9VLS3;M9PB69;M9MRE5;M9PF50;Q0E8L0;E1JHB4;A0A0S0WGQ9;M9PCC7;Q8IPG4;M9PCW8;M9MSG8	Ventral Tl10B (3)	0.431318	NaN
Etl1	SWI/SNF-related matrix-associated actin-dependent regulator of chromatin subfamily A containing DEAD/H box 1 homolog	Q9VL72	Q9VL72	Ventral Tl10B (3)	0.405336	NaN
Dpy-30L1	Protein dpy-30 homolog	Q9VKQ9	Q9VKQ9	Ventral Tl10B (3)	0.171691	NaN
dmGlut		Q9VKC9	Q9VKC9	Ventral Tl10B (3)	0.216632	NaN
rab3-GAP	Rab3 GTPase-activating protein regulatory subunit	Q9VKB9	Q9VKB9	Ventral Tl10B (3)	0.345163	NaN
CG6712	Probable ribosome production factor 1	Q9VKB4	Q9VKB4	Ventral Tl10B (3)	0.277939	NaN
		Q9VK59	Q9VK59	Ventral Tl10B (3)	0.387304	NaN
Pih1D1		Q9VK58	Q9VK58	Ventral Tl10B (3)	0.210866	NaN
A16		Q9VK43	Q9VK43	Ventral Tl10B (3)	0.00513444	NaN
l(2)35Bd	mRNA cap guanine-N7 methyltransferase	Q9VJQ4	Q9VJQ4	Ventral Tl10B (3)	0.473769	NaN
GMF		Q9VJL6	Q9VJL6	Ventral Tl10B (3)	0.537655	NaN
		Q9VJJ1	Q9VJJ1	Ventral Tl10B (3)	0.0956484	NaN
GCS2beta		Q9VJD1	Q9VJD1	Ventral Tl10B (3)	0.370964	NaN
Grip71		Q9VJ57	Q9VJ57	Ventral Tl10B (3)	0.0855213	NaN
BEST:LD25345		Q9VJ45	Q9VJ45	Ventral Tl10B (3)	-0.946545	NaN
		Q9VJ08	Q9VJ08	Ventral Tl10B (3)	0.412656	NaN
		Q9VIQ5	Q9VIQ5	Ventral Tl10B (3)	-0.447507	NaN
neb	Kinesin-like protein	Q9VIP4	Q9VIP4	Ventral Tl10B (3)	0.380463	NaN
		Q9VIP2	Q9VIP2	Ventral Tl10B (3)	0.0060161	NaN
		Q9VIL2	Q9VIL2	Ventral Tl10B (3)	0.274446	NaN
Mio		Q9VID4;Q8INT6	Q9VID4;Q8INT6	Ventral Tl10B (3)	0.436895	NaN
Tsp39D	Tetraspanin	Q9VID1	Q9VID1	Ventral Tl10B (3)	0.507603	NaN
		Q9VI53	Q9VI53	Ventral Tl10B (3)	-0.601479	NaN
		Q9VI15	Q9VI15	Ventral Tl10B (3)	0.27975	NaN
		Q9VHX2	Q9VHX2	Ventral Tl10B (3)	0.190366	NaN
		Q9VHV6;A0A0B4LGT9	Q9VHV6;A0A0B4LGT9	Ventral Tl10B (3)	0.387623	NaN
		Q9VHJ7	Q9VHJ7	Ventral Tl10B (3)	0.284656	NaN
		Q9VHI7	Q9VHI7	Ventral Tl10B (3)	0.399231	NaN
mtTFB2	Dimethyladenosine transferase 2, mitochondrial	Q9VH38	Q9VH38	Ventral Tl10B (3)	0.303199	NaN
CG6345	CDK5RAP1-like protein	Q9VGZ1	Q9VGZ1	Ventral Tl10B (3)	0.200708	NaN
CG14683	Probable methyltransferase-like protein 15 homolog	Q9VGY5	Q9VGY5	Ventral Tl10B (3)	0.0107296	NaN
Ugt35a		Q9VGS9	Q9VGS9	Ventral Tl10B (3)	-1.15355	NaN
Arfip		Q9VGQ8	Q9VGQ8	Ventral Tl10B (3)	0.115824	NaN
		Q9VGN8	Q9VGN8	Ventral Tl10B (3)	0.590256	NaN
		Q9VGM4	Q9VGM4	Ventral Tl10B (3)	0.334329	NaN
Cad87A	Cadherin-87A	Q9VGG5	Q9VGG5	Ventral Tl10B (3)	-0.526701	NaN
aurA		Q9VGF9	Q9VGF9	Ventral Tl10B (3)	0.0548939	NaN
Dip-C		Q9VG79	Q9VG79	Ventral Tl10B (3)	0.300711	NaN
		Q9VG01	Q9VG01	Ventral Tl10B (3)	-0.735136	NaN
CG3817	RRP15-like protein	Q9VFE6	Q9VFE6	Ventral Tl10B (3)	0.27036	NaN
CG6236-RA		Q9VF91	Q9VF91	Ventral Tl10B (3)	0.309366	NaN
ird5	Inhibitor of nuclear factor kappa-B kinase subunit beta	Q9VEZ5	Q9VEZ5	Ventral Tl10B (3)	0.0754655	NaN
Asun	Protein asunder	Q9VEX5	Q9VEX5	Ventral Tl10B (3)	0.226863	NaN
MED17	Mediator of RNA polymerase II transcription subunit 17	Q9VEC1	Q9VEC1	Ventral Tl10B (3)	0.180898	NaN
		Q9VE73	Q9VE73	Ventral Tl10B (3)	0.270591	NaN
Gos28	Golgi SNAP receptor complex member 1	Q9VE50	Q9VE50	Ventral Tl10B (3)	0.104496	NaN
snRNP-U1-C	U1 small nuclear ribonucleoprotein C	Q9VE17	Q9VE17	Ventral Tl10B (3)	0.355266	NaN
		Q9VDY6	Q9VDY6	Ventral Tl10B (3)	0.276641	NaN
		Q9VDT4	Q9VDT4	Ventral Tl10B (3)	0.0842027	NaN
Pk92B		Q9VDS9;Q7KSB7	Q9VDS9;Q7KSB7	Ventral Tl10B (3)	0.339174	NaN
mdlc		Q9VDP8	Q9VDP8	Ventral Tl10B (3)	0.0930131	NaN
		Q9VDI5;Q0KI39	Q9VDI5	Ventral Tl10B (3)	0.428128	NaN
meigo	Solute carrier family 35 member B1 homolog	Q9VDD7	Q9VDD7	Ventral Tl10B (3)	0.261036	NaN
Fancm		Q9VDA0	Q9VDA0	Ventral Tl10B (3)	0.0520038	NaN
mRpL45	Probable 39S ribosomal protein L45, mitochondrial	Q9VCX3	Q9VCX3	Ventral Tl10B (3)	0.351741	NaN
Usp12-46		Q9VCT9	Q9VCT9	Ventral Tl10B (3)	0.429019	NaN
		Q9VCG0	Q9VCG0	Ventral Tl10B (3)	0.213675	NaN
		Q9VCD3	Q9VCD3	Ventral Tl10B (3)	0.282612	NaN
BRWD3		Q9VC96	Q9VC96	Ventral Tl10B (3)	0.308198	NaN
		Q9VC87	Q9VC87	Ventral Tl10B (3)	0.161862	NaN
Trf4-2		Q9VC07	Q9VC07	Ventral Tl10B (3)	0.370568	NaN
		Q9VBX8	Q9VBX8	Ventral Tl10B (3)	0.397892	NaN
Mocs2	Molybdopterin synthase catalytic subunit	Q9VBX2	Q9VBX2	Ventral Tl10B (3)	0.164223	NaN
Sld5	DNA replication complex GINS protein SLD5	Q9VBI1	Q9VBI1	Ventral Tl10B (3)	0.206454	NaN
plum		Q9VBE5	Q9VBE5	Ventral Tl10B (3)	0.387766	NaN
pins		Q9VB22	Q9VB22	Ventral Tl10B (3)	0.238946	NaN
RpS10a	40S ribosomal protein S10a	Q9VB14	Q9VB14	Ventral Tl10B (3)	-0.653289	NaN
CG5003-RA		Q9VAZ0	Q9VAZ0	Ventral Tl10B (3)	0.381121	NaN
CG4884-RA		Q9VAX9	Q9VAX9	Ventral Tl10B (3)	0.359119	NaN
		Q9VAP1	Q9VAP1	Ventral Tl10B (3)	0.0861391	NaN
ND-20L		Q9VAK5	Q9VAK5	Ventral Tl10B (3)	-0.410656	NaN
		Q9VAF3	Q9VAF3	Ventral Tl10B (3)	0.312516	NaN
Sas-6	Spindle assembly abnormal protein 6 homolog	Q9VAC8	Q9VAC8	Ventral Tl10B (3)	-0.466154	NaN
		Q9VA97	Q9VA97	Ventral Tl10B (3)	0.241276	NaN
		Q9VA80	Q9VA80	Ventral Tl10B (3)	1.12501	NaN
Npc2g		Q9VA42	Q9VA42	Ventral Tl10B (3)	-0.620206	NaN
zwilch	Protein zwilch	Q9VA00	Q9VA00	Ventral Tl10B (3)	0.252486	NaN
phtf	Putative homeodomain transcription factor	Q9V9A8	Q9V9A8	Ventral Tl10B (3)	0.28943	NaN
mRpS16	Probable 28S ribosomal protein S16, mitochondrial	Q9V6Y3	Q9V6Y3	Ventral Tl10B (3)	0.17575	NaN
CG1968	Conserved oligomeric Golgi complex subunit 6	Q9V564	Q9V564	Ventral Tl10B (3)	0.407297	NaN
myo		Q9V4F4	Q9V4F4	Ventral Tl10B (3)	-0.871073	NaN
Ilk		Q9V400;E3CTS5	Q9V400	Ventral Tl10B (3)	0.0616761	NaN
Spc25	Kinetochore protein Spc25	Q9V3V7	Q9V3V7	Ventral Tl10B (3)	-0.182147	NaN
BcDNA.GH12326		Q9V3S7	Q9V3S7	Ventral Tl10B (3)	0.595234	NaN
l(2)34Fd		Q9V3P2	Q9V3P2	Ventral Tl10B (3)	0.247045	NaN
c12.1	Protein CWC15 homolog	Q9V3B6;REV__Q9VNZ4	Q9V3B6	Ventral Tl10B (3)	0.433106	NaN
PEK	Eukaryotic translation initiation factor 2-alpha kinase	Q9NIV1;A0A0B4KGJ5;A0A0B4KG56	Q9NIV1;A0A0B4KGJ5;A0A0B4KG56	Ventral Tl10B (3)	0.262682	NaN
hdc	Headcase protein;Headcase short protein	Q9N2M8;A0A0B4KI61;Q8IMI6	Q9N2M8;A0A0B4KI61	Ventral Tl10B (3)	0.680201	NaN
spin	Protein spinster	Q9GQQ0	Q9GQQ0	Ventral Tl10B (3)	-0.738156	NaN
Ranbp16	Ran-binding protein 16	X2JFC3;Q9GQN0;M9MSN9;M9MS57;M9MSD3;M9MSB0	X2JFC3;Q9GQN0;M9MSN9;M9MS57;M9MSD3;M9MSB0	Ventral Tl10B (3)	0.277341	NaN
lgs	Protein BCL9 homolog	Q961D9	Q961D9	Ventral Tl10B (3)	0.317637	NaN
milt	Trafficking kinesin-binding protein milt	Q960V3	Q960V3	Ventral Tl10B (3)	0.252892	NaN
		Q960J7	Q960J7	Ventral Tl10B (3)	0.361956	NaN
BEAF-32		Q94513	Q94513	Ventral Tl10B (3)	0.575362	NaN
		Q8T4C9	Q8T4C9	Ventral Tl10B (3)	-1.28689	NaN
		Q8T051	Q8T051	Ventral Tl10B (3)	-0.716894	NaN
Sdhaf3	Succinate dehydrogenase assembly factor 3, mitochondrial	Q8SZ16	Q8SZ16	Ventral Tl10B (3)	0.467878	NaN
		Q8SZ15	Q8SZ15	Ventral Tl10B (3)	0.389744	NaN
gw	Protein Gawky	Q8SY33	Q8SY33	Ventral Tl10B (3)	0.377468	NaN
kuk		Q8SX89	Q8SX89	Ventral Tl10B (3)	0.325888	NaN
Pis		Q8SX37	Q8SX37	Ventral Tl10B (3)	0.600064	NaN
EG:171D11.2		Q8SWW9	Q8SWW9	Ventral Tl10B (3)	0.107393	NaN
CG8112-RA	O-acyltransferase	Q8MYW9;D3DMP4;A0A0B4LGV0	Q8MYW9;D3DMP4;A0A0B4LGV0	Ventral Tl10B (3)	-0.0510653	NaN
GalNAc-T2	Polypeptide N-acetylgalactosaminyltransferase;N-acetylgalactosaminyltransferase 7	X2JEA3;Q8MV48	X2JEA3;Q8MV48	Ventral Tl10B (3)	0.0822736	NaN
Ns1	Guanine nucleotide-binding protein-like 3 homolog	Q8MT06	Q8MT06	Ventral Tl10B (3)	0.309759	NaN
mRpS2		Q8MSS7	Q8MSS7	Ventral Tl10B (3)	0.446989	NaN
Mekk1		Q8MSQ4;Q9VE37	Q8MSQ4;Q9VE37	Ventral Tl10B (3)	0.319059	NaN
		Q8MRI4	Q8MRI4	Ventral Tl10B (3)	0.274479	NaN
CG1827	Putative N(4)-(beta-N-acetylglucosaminyl)-L-asparaginase CG1827;Glycosylasparaginase alpha chain;Glycosylasparaginase beta chain	Q8MR45	Q8MR45	Ventral Tl10B (3)	0.340406	NaN
LBR	Lamin-B receptor	Q8MLV1	Q8MLV1	Ventral Tl10B (3)	0.347396	NaN
Coq9	Ubiquinone biosynthesis protein COQ9, mitochondrial	Q8MKN0	Q8MKN0	Ventral Tl10B (3)	0.243639	NaN
CG32638-RB		Q8IR72	Q8IR72	Ventral Tl10B (3)	0.586074	NaN
		Q8IQ70	Q8IQ70	Ventral Tl10B (3)	-0.0980015	NaN
		Q8IPU7;Q8IPU8;Q9VPD6	Q8IPU7;Q8IPU8;Q9VPD6	Ventral Tl10B (3)	0.262926	NaN
Ada1-2;Ada1-1		Q8IPA1;Q8IP99	Q8IPA1;Q8IP99	Ventral Tl10B (3)	0.0314376	NaN
		Q8IP11	Q8IP11	Ventral Tl10B (3)	1.8307	NaN
CG10336	Protein TIPIN homolog	Q8INX3	Q8INX3	Ventral Tl10B (3)	0.1664	NaN
CG31674-RA		Q8INU6	Q8INU6	Ventral Tl10B (3)	-1.73432	NaN
		Q8INL3	Q8INL3	Ventral Tl10B (3)	0.085223	NaN
timeout		Q8INH7	Q8INH7	Ventral Tl10B (3)	0.103843	NaN
Hmr		Q86CW5	Q86CW5	Ventral Tl10B (3)	0.221718	NaN
		Q9XZ25;Q86BR7	Q9XZ25;Q86BR7	Ventral Tl10B (3)	0.173809	NaN
pfk		Q86BP7;Q9VZU3	Q86BP7;Q9VZU3	Ventral Tl10B (3)	0.682341	NaN
rno	PHD finger protein rhinoceros	Q7YZH1	Q7YZH1	Ventral Tl10B (3)	1.09356	NaN
spoon		Q9W4C4;Q7KVW1	Q9W4C4;Q7KVW1	Ventral Tl10B (3)	0.41683	NaN
CG33230-RA		Q7KVB0	Q7KVB0	Ventral Tl10B (3)	-0.868005	NaN
PAN3;CG11486-RK;CG11486;CG11486-RB	PAB-dependent poly(A)-specific ribonuclease subunit PAN3	Q9VZV3;Q7KV83;Q95RR8;Q9I7T8;A8JNJ2;Q8IRE7	Q9VZV3;Q7KV83;Q95RR8;Q9I7T8;A8JNJ2;Q8IRE7	Ventral Tl10B (3)	0.440019	NaN
		Q7KSV7;Q95T08	Q7KSV7;Q95T08	Ventral Tl10B (3)	0.491449	NaN
		Q7KRS9;Q8IMG3	Q7KRS9;Q8IMG3	Ventral Tl10B (3)	0.15359	NaN
CG11148	PERQ amino acid-rich with GYF domain-containing protein CG11148	Q7KQM6;REV__A0A0B4KG49	Q7KQM6	Ventral Tl10B (3)	0.101563	NaN
tef	Protein teflon	Q7K4M4	Q7K4M4	Ventral Tl10B (3)	0.247164	NaN
		Q7K4L8	Q7K4L8	Ventral Tl10B (3)	0.253602	NaN
CG8892-RB	UBX domain-containing protein 7	Q7K4I5	Q7K4I5	Ventral Tl10B (3)	0.25439	NaN
loopin-1		Q7K2S9	Q7K2S9	Ventral Tl10B (3)	0.164565	NaN
lat		Q7K2L1	Q7K2L1	Ventral Tl10B (3)	0.114089	NaN
Jheh3		Q7K1W4	Q7K1W4	Ventral Tl10B (3)	-1.03966	NaN
CG6491		Q7K1H0	Q7K1H0	Ventral Tl10B (3)	0.154468	NaN
Not3		Q7K126	Q7K126	Ventral Tl10B (3)	0.397471	NaN
Tpc1		Q7K0L7	Q7K0L7	Ventral Tl10B (3)	0.550878	NaN
Mob4	MOB kinase activator-like 4	Q7K0E3;A0A0B4K6X9	Q7K0E3;A0A0B4K6X9	Ventral Tl10B (3)	0.251028	NaN
mRpL42		Q7K0A0	Q7K0A0	Ventral Tl10B (3)	-0.0830602	NaN
Tsp42Ef	Tetraspanin	Q7K010	Q7K010	Ventral Tl10B (3)	0.247184	NaN
		Q7JX95	Q7JX95	Ventral Tl10B (3)	-0.564528	NaN
wash	WAS protein family homolog 1	Q7JW27	Q7JW27	Ventral Tl10B (3)	0.113626	NaN
trmt10c	Mitochondrial ribonuclease P protein 1 homolog	Q7JUX9	Q7JUX9	Ventral Tl10B (3)	0.369434	NaN
		Q7JRM5	Q7JRM5	Ventral Tl10B (3)	0.234323	NaN
CG30094-RA		Q7JR99	Q7JR99	Ventral Tl10B (3)	-0.636526	NaN
CaMKI		Q7JMV3;A4V110;Q0KIF7	Q7JMV3;A4V110;Q0KIF7	Ventral Tl10B (3)	0.03497	NaN
Synj		Q5U0V7	Q5U0V7	Ventral Tl10B (3)	0.348705	NaN
CG9795-RD		Q59E01;Q8IPM6;Q86BB1;Q95RI8	Q59E01;Q8IPM6;Q86BB1;Q95RI8	Ventral Tl10B (3)	0.424405	NaN
dnk	Deoxynucleoside kinase	Q540Z9;Q9XZT6	Q540Z9;Q9XZT6	Ventral Tl10B (3)	-0.0792233	NaN
		Q4V619	Q4V619	Ventral Tl10B (3)	0.00927014	NaN
		Q4V5H0;Q9VCD4	Q4V5H0;Q9VCD4	Ventral Tl10B (3)	-1.22643	NaN
		Q4V3Z5	Q4V3Z5	Ventral Tl10B (3)	0.165161	NaN
		Q2PDX2;M9PF23	Q2PDX2;M9PF23	Ventral Tl10B (3)	0.267987	NaN
Cp110		Q2PDW6;Q9VR58;M9PI43	Q2PDW6;Q9VR58;M9PI43	Ventral Tl10B (3)	-0.513243	NaN
NimB3		Q2PDU0	Q2PDU0	Ventral Tl10B (3)	-0.511442	NaN
Rrp42		Q29QQ9	Q29QQ9	Ventral Tl10B (3)	0.266601	NaN
Pcmt	Protein-L-isoaspartate(D-aspartate) O-methyltransferase;Protein-L-isoaspartate O-methyltransferase	Q27869;A0A0B4KGK0	Q27869;A0A0B4KGK0	Ventral Tl10B (3)	0.254155	NaN
l(2)not	Lethal(2)neighbour of tid protein	Q27333	Q27333	Ventral Tl10B (3)	-0.935053	NaN
CG32699	1-acylglycerophosphocholine O-acyltransferase 1	Q0KHU5	Q0KHU5	Ventral Tl10B (3)	-0.934647	NaN
eIF2B-delta		Q0E8X6;Q9W1Q8	Q0E8X6;Q9W1Q8	Ventral Tl10B (3)	0.2805	NaN
CG30427-RB;CG30427-RC		Q9W0Y5;Q0E8W1;Q8MMC6	Q9W0Y5;Q0E8W1;Q8MMC6	Ventral Tl10B (3)	-0.0163278	NaN
		Q0E8P1;Q9VIX6	Q0E8P1;Q9VIX6	Ventral Tl10B (3)	0.354322	NaN
mub		Q0E8A7;M9NEH9	Q0E8A7;M9NEH9	Ventral Tl10B (3)	0.278445	NaN
TfIIFalpha	General transcription factor IIF subunit 1	Q05913	Q05913	Ventral Tl10B (3)	0.404706	NaN
H	Protein hairless	Q02308	Q02308	Ventral Tl10B (3)	0.134543	NaN
Rtc1	Probable RNA 3-terminal phosphate cyclase-like protein	P56175	P56175	Ventral Tl10B (3)	0.445985	NaN
mnb	Serine/threonine-protein kinase minibrain	P49657;X2JFM3;Q9VX06	P49657;X2JFM3;Q9VX06	Ventral Tl10B (3)	0.247081	NaN
mago	Protein mago nashi	P49028	P49028	Ventral Tl10B (3)	0.434004	NaN
plu	DNA replication inhibitor plutonium	P42570	P42570	Ventral Tl10B (3)	0.320759	NaN
lola;pre-lola-G	Longitudinals lacking protein, isoform G	P42283;A0A0B4KEI4;P42284;Q7KQZ4	P42283;A0A0B4KEI4	Ventral Tl10B (3)	0.185117	NaN
37135	Septin-1	P42207	P42207	Ventral Tl10B (3)	0.22383	NaN
salm	Homeotic protein spalt-major	X2JA59;P39770	X2JA59;P39770	Ventral Tl10B (3)	0.670082	NaN
mts	Serine/threonine-protein phosphatase;Serine/threonine-protein phosphatase PP2A	X2JDI1;P23696	X2JDI1;P23696	Ventral Tl10B (3)	0.10739	NaN
Su(var)3-7	Protein suppressor of variegation 3-7	P20193;E1JIJ9	P20193;E1JIJ9	Ventral Tl10B (3)	0.356325	NaN
ptc	Protein patched	P18502	P18502	Ventral Tl10B (3)	0.210146	NaN
RpL40	Ubiquitin-60S ribosomal protein L40;Ubiquitin;60S ribosomal protein L40	Q7JYK1;P18101	Q7JYK1;P18101	Ventral Tl10B (3)	-0.611782	NaN
crn	Protein crooked neck	P17886	P17886	Ventral Tl10B (3)	0.0175931	NaN
Lsp1beta	Larval serum protein 1 beta chain	X2J8F5;P11996	X2J8F5;P11996	Ventral Tl10B (3)	-0.70213	NaN
Cp36	Chorion protein S36	P07182	P07182	Ventral Tl10B (3)	-0.0166667	NaN
eve	Segmentation protein even-skipped	P06602	P06602	Ventral Tl10B (3)	0.845665	NaN
His1:CG33861;His1;His1:CG33834;His1:CG33807	Histone H1	Q4AB54;P02255;Q4AB94;Q4ABD8	Q4AB54;P02255;Q4AB94;Q4ABD8	Ventral Tl10B (3)	0.343891	NaN
l(1)10Bb		O97454	O97454	Ventral Tl10B (3)	0.200573	NaN
CG4045	tRNA (guanine-N(7)-)-methyltransferase	O77263	O77263	Ventral Tl10B (3)	0.38055	NaN
Pp4-19C	Serine/threonine-protein phosphatase;Serine/threonine-protein phosphatase 4 catalytic subunit	X2JG90;O76932	X2JG90;O76932	Ventral Tl10B (3)	0.216128	NaN
EG:100G10.1		O76861	O76861	Ventral Tl10B (3)	0.360452	NaN
png		O46308	O46308	Ventral Tl10B (3)	0.241842	NaN
RpL39	60S ribosomal protein L39	O16130	O16130	Ventral Tl10B (3)	-0.946041	NaN
e(y)3	Supporter of activation of yellow protein	M9PHL0;M9PHZ0;M9PI16;Q9VWF2	M9PHL0;M9PHZ0;M9PI16;Q9VWF2	Ventral Tl10B (3)	0.276081	NaN
Tao		M9PHK2;Q0KHQ5;Q8IQW6;M9NE33;M9PI11	M9PHK2;Q0KHQ5;Q8IQW6	Ventral Tl10B (3)	-0.472196	NaN
Trf2		Q8T052;M9PHD8;Q07DP5	Q8T052;M9PHD8;Q07DP5	Ventral Tl10B (3)	0.333679	NaN
Bx42	Puff-specific protein Bx42	M9PGQ6;P39736	M9PGQ6;P39736	Ventral Tl10B (3)	0.368421	NaN
Cdk12	Cyclin-dependent kinase 12	M9PG50;Q9VP22	M9PG50;Q9VP22	Ventral Tl10B (3)	0.437637	NaN
TfIIS	Transcription elongation factor S-II	M9PFV9;P20232;Q9VXS6	M9PFV9;P20232	Ventral Tl10B (3)	0.367047	NaN
Hip14	Palmitoyltransferase	Q9VUW9;M9PFE4	Q9VUW9;M9PFE4	Ventral Tl10B (3)	0.118374	NaN
alien	COP9 signalosome complex subunit 2	M9PFB5;Q94899	M9PFB5;Q94899	Ventral Tl10B (3)	0.421288	NaN
tral		M9PF14;M9PF20	M9PF14;M9PF20	Ventral Tl10B (3)	0.0689604	NaN
byn	T-related protein	M9PEX3;P55965	M9PEX3;P55965	Ventral Tl10B (3)	0.615349	NaN
simj		Q960V1;Q0E8G1;M9PET3;M9PF79	Q960V1;Q0E8G1;M9PET3;M9PF79	Ventral Tl10B (3)	0.221111	NaN
ZnT63C		Q7K3K5;M9PEG6	Q7K3K5;M9PEG6	Ventral Tl10B (3)	-1.07223	NaN
		M9PDP5;Q9W4R7;M9PGK9	M9PDP5;Q9W4R7;M9PGK9	Ventral Tl10B (3)	-0.784996	NaN
rost	Protein rolling stone	M9PD01;O44252	M9PD01;O44252	Ventral Tl10B (3)	-0.6063	NaN
mRpS7	28S ribosomal protein S7, mitochondrial	M9PCL5;Q9VKX4	M9PCL5;Q9VKX4	Ventral Tl10B (3)	0.136398	NaN
x16		M9PC85;Q9V3V0	M9PC85;Q9V3V0	Ventral Tl10B (3)	0.471775	NaN
Mad	Mothers against decapentaplegic homolog;Protein mothers against dpp	M9PBX0;P42003	M9PBX0;P42003	Ventral Tl10B (3)	-0.140817	NaN
UbcE2M;Ubc12	Nedd8-conjugating enzyme Ubc12	M9PBW0;Q9VSF3	M9PBW0;Q9VSF3	Ventral Tl10B (3)	0.225625	NaN
CG17078-RA		M9PAY6;M9PDS0;Q9VPM7	M9PAY6;M9PDS0;Q9VPM7	Ventral Tl10B (3)	0.387747	NaN
CG7427	Defective in cullin neddylation protein;DCN1-like protein	M9PI67;M9NEA3;M9NDR9;Q9VUQ8	M9PI67;M9NEA3;M9NDR9;Q9VUQ8	Ventral Tl10B (3)	0.167272	NaN
Lasp	LIM and SH3 domain protein Lasp	M9NDA6;Q8I7C3;M9NFH3	M9NDA6;Q8I7C3;M9NFH3	Ventral Tl10B (3)	0.314847	NaN
		M9MRL4	M9MRL4	Ventral Tl10B (3)	0.489326	NaN
Torsin	Torsin-like protein	F6JQA6;O77277	F6JQA6;O77277	Ventral Tl10B (3)	0.37371	NaN
Tango11	Transport and Golgi organization protein 11	E2QCK0;Q961C9;A0A0B4LG59	E2QCK0;Q961C9	Ventral Tl10B (3)	0.290073	NaN
Grip84	Gamma-tubulin complex component 2 homolog	E1JJQ3;Q8IQW7;X2JG40;E1JJQ4;Q9XYP7	E1JJQ3;Q8IQW7;X2JG40;E1JJQ4;Q9XYP7	Ventral Tl10B (3)	0.241437	NaN
sol	Calpain-D	E1JJ98;P27398	E1JJ98;P27398	Ventral Tl10B (3)	0.153326	NaN
osa	Trithorax group protein osa	Q7KSE8;E1JIN6;Q8IN94;A0A0B4KHB1;A0A0B4KGD1	Q7KSE8;E1JIN6;Q8IN94;A0A0B4KHB1;A0A0B4KGD1	Ventral Tl10B (3)	0.48506	NaN
Sin		E1JI58;Q9VP85	E1JI58;Q9VP85	Ventral Tl10B (3)	0.489617	NaN
CG7544	Methyltransferase-like protein;Methyltransferase-like protein 16 homolog	E1JH71;Q7K3B9	E1JH71;Q7K3B9	Ventral Tl10B (3)	0.238345	NaN
Atg16		Q86BR6;B7Z0R7;Q95TJ1	Q86BR6;B7Z0R7;Q95TJ1	Ventral Tl10B (3)	0.229499	NaN
		B7Z0N0	B7Z0N0	Ventral Tl10B (3)	0.27356	NaN
Su(var)3-3	Possible lysine-specific histone demethylase 1	B7Z0G7;Q9VW97;M9PFR5	B7Z0G7;Q9VW97;M9PFR5	Ventral Tl10B (3)	0.19101	NaN
Jabba		B7YZK4;B7YZK5;A0A0B4KG78;A0A0B4JCT7;B7YZK6	B7YZK4;B7YZK5;A0A0B4KG78;A0A0B4JCT7;B7YZK6	Ventral Tl10B (3)	0.20519	NaN
hfw	Protein halfway	B6IDK2;Q9W568	B6IDK2;Q9W568	Ventral Tl10B (3)	0.199531	NaN
how	Protein held out wings	E1JIT0;B3DNL7;O01367;A0A0B4KHV5	E1JIT0;B3DNL7;O01367;A0A0B4KHV5	Ventral Tl10B (3)	0.0736144	NaN
Tis11	Protein TIS11	B3DN56;P47980	B3DN56;P47980	Ventral Tl10B (3)	0.00895891	NaN
Nup153	Nuclear pore complex protein Nup153	A8JV18;Q9VXE6	A8JV18;Q9VXE6	Ventral Tl10B (3)	0.401562	NaN
		A8JUS8;Q9W5G0	A8JUS8;Q9W5G0	Ventral Tl10B (3)	0.428708	NaN
A2bp1		M9PF74;A8JNQ5;A8JNQ4;M9ND74;Q7YU08;Q9VT99;Q9VT98;M9NFQ7	M9PF74;A8JNQ5;A8JNQ4;M9ND74;Q7YU08;Q9VT99;Q9VT98;M9NFQ7	Ventral Tl10B (3)	0.226749	NaN
CG34183	Putative RNA polymerase II subunit B1 CTD phosphatase RPAP2 homolog	A8DYY5	A8DYY5	Ventral Tl10B (3)	-0.583049	NaN
Doa	Serine/threonine-protein kinase Doa	B7Z0R6;A4V3J9;Q0KI03;Q8IML9;A0A0B4K7Z3;A8JRF7;Q86B72;A0A0C4DHG9;P49762	B7Z0R6;A4V3J9;Q0KI03;Q8IML9;A0A0B4K7Z3;A8JRF7;Q86B72;A0A0C4DHG9;P49762	Ventral Tl10B (3)	0.11564	NaN
Pdk1	3-phosphoinositide-dependent protein kinase 1	A4V164;H5V8B9;Q9W0V1;A4V166	A4V164;H5V8B9;Q9W0V1;A4V166	Ventral Tl10B (3)	0.202121	NaN
CG18065-RA		A1ZBV5	A1ZBV5	Ventral Tl10B (3)	0.30609	NaN
		A1ZB29	A1ZB29	Ventral Tl10B (3)	0.381473	NaN
tum		A1Z9I5	A1Z9I5	Ventral Tl10B (3)	0.316242	NaN
AGBE		A1Z992	A1Z992	Ventral Tl10B (3)	0.0831506	NaN
Sr-CII		A1Z8V0;Q9V3H7	A1Z8V0	Ventral Tl10B (3)	-0.977152	NaN
CG18004-RB		A1Z8D4	A1Z8D4	Ventral Tl10B (3)	0.467162	NaN
cdc2rk		A1Z840	A1Z840	Ventral Tl10B (3)	-0.065319	NaN
CG30001-RA		A1Z7Z8	A1Z7Z8	Ventral Tl10B (3)	-1.02422	NaN
Hydr1		E2QCN3;A1Z7Q7	E2QCN3;A1Z7Q7	Ventral Tl10B (3)	0.438585	NaN
CG30349-RA		A1Z7K2	A1Z7K2	Ventral Tl10B (3)	0.220207	NaN
CG8586-RA		A1Z7H7	A1Z7H7	Ventral Tl10B (3)	-0.726571	NaN
CG1383		A1Z743;A1Z745;Q8SXN9	A1Z743;A1Z745;Q8SXN9	Ventral Tl10B (3)	0.206237	NaN
Bap170		A1Z6M0	A1Z6M0	Ventral Tl10B (3)	0.275766	NaN
		A1Z6H6	A1Z6H6	Ventral Tl10B (3)	0.26389	NaN
l(3)07882	Nucleolar protein 14 homolog	A0A126GUW2;Q9VEJ2	A0A126GUW2;Q9VEJ2	Ventral Tl10B (3)	0.136804	NaN
hd	Protein downstream neighbor of son homolog	A0A126GUQ3;Q9VNA8	A0A126GUQ3;Q9VNA8	Ventral Tl10B (3)	0.0831625	NaN
att-ORFA		A0A0B4LIE8;Q9VDL7;Q8IN53	A0A0B4LIE8;Q9VDL7;Q8IN53	Ventral Tl10B (3)	0.508814	NaN
Rga	Regulator of gene activity	A0A0B4LHS9;Q94547	A0A0B4LHS9;Q94547	Ventral Tl10B (3)	0.187955	NaN
CG7694	E3 ubiquitin-protein ligase RNF181 homolog	A0A0B4LHA6;Q9VE61	A0A0B4LHA6;Q9VE61	Ventral Tl10B (3)	0.0561423	NaN
thr		A0A0B4LFY0	A0A0B4LFY0	Ventral Tl10B (3)	-0.591038	NaN
ana2		A0A0B4LFU9	A0A0B4LFU9	Ventral Tl10B (3)	0.0492303	NaN
cg		A8DYD3;A1Z9M3;B7YZE6;A0A0B4LFC7;A8DYD2;A8DYD1;A0A0B4LF29;A0A126GUP1	A8DYD3;A1Z9M3;B7YZE6;A0A0B4LFC7;A8DYD2;A8DYD1;A0A0B4LF29;A0A126GUP1	Ventral Tl10B (3)	0.417216	NaN
Mppe		Q8T085;A1Z8S4;A0A0B4LG64;A0A0B4LF50	Q8T085;A1Z8S4;A0A0B4LG64;A0A0B4LF50	Ventral Tl10B (3)	0.401117	NaN
Cyp6u1	Probable cytochrome P450 6u1	A0A0B4LET2;Q9V979	A0A0B4LET2;Q9V979	Ventral Tl10B (3)	0.249525	NaN
dco	Discs overgrown protein kinase	A0A0B4KHX3;O76324	A0A0B4KHX3;O76324	Ventral Tl10B (3)	0.324064	NaN
Pp1alpha-96A	Serine/threonine-protein phosphatase;Serine/threonine-protein phosphatase alpha-1 isoform	A0A0B4KHS9;P48461;A8QI94	A0A0B4KHS9;P48461	Ventral Tl10B (3)	0.196986	NaN
dgt1		A0A0B4KHH6;Q9VAF4;A0A0B4LHU7	A0A0B4KHH6;Q9VAF4;A0A0B4LHU7	Ventral Tl10B (3)	0.228648	NaN
CtBP		A0A0B4KHB2	A0A0B4KHB2	Ventral Tl10B (3)	0.486004	NaN
Tsp96F	Tetraspanin	Q9V3X2;A0A0B4KH03	Q9V3X2;A0A0B4KH03	Ventral Tl10B (3)	-0.875554	NaN
lute;CG5319-RA		Q9VEL0;A0A0B4KGU2;C7LAF3	Q9VEL0;A0A0B4KGU2;C7LAF3	Ventral Tl10B (3)	0.491161	NaN
Mvl	Protein Malvolio	A4V370;A0A0B4KGL5;P49283;A0A0B4K7L4	A4V370;A0A0B4KGL5;P49283;A0A0B4K7L4	Ventral Tl10B (3)	0.229757	NaN
cic	Putative transcription factor capicua	A0A0B4KGD7;A0A0B4K6D6;A0A0B4K778;A0A0B4K698;Q9U1H0	A0A0B4KGD7;A0A0B4K6D6;A0A0B4K778;A0A0B4K698;Q9U1H0	Ventral Tl10B (3)	0.369658	NaN
apt		O61602;Q9W1M6;A0A0B4KGD0;Q8MLR4	O61602;Q9W1M6;A0A0B4KGD0;Q8MLR4	Ventral Tl10B (3)	0.237461	NaN
Jupiter		A0A0B4KG85	A0A0B4KG85	Ventral Tl10B (3)	-0.0886108	NaN
ttv	Exostosin-1	A0A0B4KER9;Q9V730;D5SHU8	A0A0B4KER9;Q9V730	Ventral Tl10B (3)	0.228272	NaN
PI31	Proteasome inhibitor PI31 subunit	A0A0B4KEK7;Q9V637	A0A0B4KEK7;Q9V637	Ventral Tl10B (3)	0.188165	NaN
tun	Protein N-terminal glutamine amidohydrolase	A0A0B4K882;Q7K2Y9	A0A0B4K882;Q7K2Y9	Ventral Tl10B (3)	0.3777	NaN
larp	La-related protein 1	A0A0B4K7Y7;Q9VAW5;A0A0B4K6K9	A0A0B4K7Y7;Q9VAW5;A0A0B4K6K9	Ventral Tl10B (3)	0.400134	NaN
Mlf	Myeloid leukemia factor	A0A0B4K7R5;E1JH79;Q9NKV0	A0A0B4K7R5;E1JH79;Q9NKV0	Ventral Tl10B (3)	0.22681	NaN
p53		A0A0B4K7P1;Q9N6D8;Q8IMZ4	A0A0B4K7P1;Q9N6D8;Q8IMZ4	Ventral Tl10B (3)	0.0524252	NaN
gus	Protein gustavus	A0A0B4K6X3;A1Z6E0	A0A0B4K6X3;A1Z6E0	Ventral Tl10B (3)	0.410082	NaN
su(Hw)	Protein suppressor of hairy wing	A0A0B4K6W1;P08970	A0A0B4K6W1;P08970	Ventral Tl10B (3)	0.0948293	NaN
pr-set7	Histone-lysine N-methyltransferase pr-set7	A0A0B4K680;Q9VFK6	A0A0B4K680;Q9VFK6	Ventral Tl10B (3)	-0.646917	NaN
btsz		A0A0B4K657;Q6XK20;B7Z0K1	A0A0B4K657	Ventral Tl10B (3)	0.195141	NaN
CG9849	PRADC1-like protein	A0A0B4JCU5;Q9W1W9	A0A0B4JCU5;Q9W1W9	Ventral Tl10B (3)	-1.01181	NaN
Papst2	Adenosine 3-phospho 5-phosphosulfate transporter 2	Q9VVD9	Q9VVD9	Ventral Tl10B (3)	-0.526731	NaN
		A0A0B4JD24;A0A0B4JCR9;Q7JQT8	A0A0B4JD24;A0A0B4JCR9;Q7JQT8	Ventral Tl10B (3)	0.39783	NaN
beta-Man		A0A0B4KGF7;Q9VMY5;Q0KIE6	A0A0B4KGF7;Q9VMY5;Q0KIE6	Ventral spn27A (4)	NaN	-0.235854
		A0A0B4LFY9	A0A0B4LFY9	Ventral spn27A (4)	NaN	0.034429
		Q9V9Z0	Q9V9Z0	Ventral spn27A (4)	NaN	-0.176643
DNApol-eta		Q9VNX1	Q9VNX1	Ventral spn27A (4)	NaN	0.242289
		Q9VR06	Q9VR06	Ventral spn27A (4)	NaN	0.0548817
		Q9VR44	Q9VR44	Ventral spn27A (4)	NaN	0.234989
CG10099		Q9VRY7;Q8T476	Q9VRY7;Q8T476	Ventral spn27A (4)	NaN	0.0430447
		Q9VU04	Q9VU04	Ventral spn27A (4)	NaN	-0.234461
Dic1		Q9Y166	Q9Y166	Ventral spn27A (4)	NaN	-0.130495
		Q8MMD0	Q8MMD0	Ventral spn27A (4)	NaN	-0.185222
unc-13		X2J9E1;Q8IM87;Q9V483;L0MPR2	X2J9E1;Q8IM87;Q9V483;L0MPR2	Ventral spn27A (4)	NaN	-0.160161
		Q7KV24	Q7KV24	Ventral spn27A (4)	NaN	0.00809115
S2P		Q7JZ56	Q7JZ56	Ventral spn27A (4)	NaN	-0.0670596
CG4806-RA		Q6IGX8	Q6IGX8	Ventral spn27A (4)	NaN	-0.262063
Csat		Q9W4W6;O76865	Q9W4W6;O76865	Ventral spn27A (4)	NaN	0.0101685
Fatp		Q9VKU1;E1JHE4	Q9VKU1;E1JHE4	Ventral spn27A (4)	NaN	0.0565238
CG32795	Transmembrane protein 120 homolog	A4V3W8;Q9U1M2	A4V3W8;Q9U1M2	Ventral spn27A (4)	NaN	-0.0509077
CG17508-RA		A1Z6G4	A1Z6G4	Ventral spn27A (4)	NaN	0.0503807
Arl1	ADP-ribosylation factor-like protein 1	P25160	P25160	Ventral spn27A (4)	NaN	0.10334
mod	DNA-binding protein modulo	A0A0B4K7G4;P13469	A0A0B4K7G4;P13469	Ventral spn27A (4)	NaN	-0.818424
sax	Receptor protein serine/threonine kinase	Q95U21;Q7JQ36;A0A0B4K7J3	Q95U21;Q7JQ36;A0A0B4K7J3	Ventral spn27A (4)	NaN	0.243243
mahj	Protein mahjong	A0A0B4K8A5;Q9W2F2	A0A0B4K8A5;Q9W2F2	Ventral spn27A (4)	NaN	0.212557
140up	RPII140-upstream gene protein	A0A0B4KFZ0;P81928	A0A0B4KFZ0;P81928	Ventral spn27A (4)	NaN	0.418312
CG10326	ARL-6-interacting protein 1 homolog	A0A0B4KG41;Q9VES1	A0A0B4KG41;Q9VES1	Ventral spn27A (4)	NaN	-0.793434
CG17931	Putative SERF-like protein	A0A0B4KH85;Q9VEW2	A0A0B4KH85;Q9VEW2	Ventral spn27A (4)	NaN	0.0256053
Rlip	RalA-binding protein 1	A0A0B4KHU1;Q9VDG2	A0A0B4KHU1;Q9VDG2	Ventral spn27A (4)	NaN	-0.513534
Sec22		O77434;M9PGI6	O77434;M9PGI6	Ventral spn27A (4)	NaN	0.157967
PSR	Bifunctional arginine demethylase and lysyl-hydroxylase PSR	A0A0B4KHW1;Q9VD28	A0A0B4KHW1;Q9VD28	Ventral spn27A (4)	NaN	0.400183
Map205		A0A0B4KI71	A0A0B4KI71	Ventral spn27A (4)	NaN	0.223021
		A0A0B4LGA2	A0A0B4LGA2	Ventral spn27A (4)	NaN	-0.513536
CG3209-RA		A0A0B4LHH1;Q960R0;Q9W1B5;A0A0B4LGJ9	A0A0B4LHH1;Q960R0;Q9W1B5;A0A0B4LGJ9	Ventral spn27A (4)	NaN	0.0545737
GstT2		A1Z7X7	A1Z7X7	Ventral spn27A (4)	NaN	-0.4671
		A1Z818;E1JH25;E1JH24	A1Z818;E1JH25;E1JH24	Ventral spn27A (4)	NaN	-0.52285
Rab8		O18338;M9NEE8	O18338;M9NEE8	Ventral spn27A (4)	NaN	0.0611909
		Q8T008;A1Z8A7;A8DY95	Q8T008;A1Z8A7;A8DY95	Ventral spn27A (4)	NaN	-0.919301
		A1ZA83	A1ZA83	Ventral spn27A (4)	NaN	0.241975
		A1ZAA9	A1ZAA9	Ventral spn27A (4)	NaN	0.367166
AdipoR	Adiponectin receptor protein	A4V392;Q9VCY8	A4V392;Q9VCY8	Ventral spn27A (4)	NaN	0.584628
CG2694-RA		A4V3W7;Q8IRV6;Q9W4W3;Q9VM89	A4V3W7;Q8IRV6;Q9W4W3	Ventral spn27A (4)	NaN	0.0527919
CkIIbeta	Casein kinase II subunit beta	A4V4C1;M9NGA3;M9NDU6;M9PHA6;P08182	A4V4C1;M9NGA3;M9NDU6;M9PHA6;P08182	Ventral spn27A (4)	NaN	0.304706
Hsc20		A8JNT7	A8JNT7	Ventral spn27A (4)	NaN	-0.730494
Efa6		A8JR82;E2QD55;A8JR81;E2QD56;E1JIT7	A8JR82;E2QD55;A8JR81;E2QD56;E1JIT7	Ventral spn27A (4)	NaN	0.150104
	DNA-directed RNA polymerase	A8JUY3	A8JUY3	Ventral spn27A (4)	NaN	0.247759
retm	Protein real-time	B5RIN0;M9PB50;Q9VMD6	B5RIN0;M9PB50;Q9VMD6	Ventral spn27A (4)	NaN	0.310389
Fis1		B7YZT3;B7YZT2;A1Z6G3;Q8SYX2	B7YZT3;B7YZT2;A1Z6G3;Q8SYX2	Ventral spn27A (4)	NaN	-0.737406
CG4668;CG42389-RF		Q9VJJ8;Q9VJJ9;M9PD19;B7YZW3	Q9VJJ8;Q9VJJ9;M9PD19;B7YZW3	Ventral spn27A (4)	NaN	0.00497991
Hira	Protein HIRA homolog	O17468	O17468	Ventral spn27A (4)	NaN	0.19899
Sulf1-RA;Sulf1	Extracellular sulfatase SULF-1 homolog	D1Z367;Q9VEX0	D1Z367;Q9VEX0	Ventral spn27A (4)	NaN	-0.553531
		E1JGK8	E1JGK8	Ventral spn27A (4)	NaN	-0.488241
norpA	Phosphoinositide phospholipase C;1-phosphatidylinositol 4,5-bisphosphate phosphodiesterase	X2JCI4;E1JJD5;P13217	X2JCI4;E1JJD5;P13217	Ventral spn27A (4)	NaN	-0.872097
sws	Neuropathy target esterase sws	E1JJF4;Q9U969	E1JJF4;Q9U969	Ventral spn27A (4)	NaN	0.164943
ATPsyn-gamma	ATP synthase subunit gamma, mitochondrial	O01666	O01666	Ventral spn27A (4)	NaN	-0.539495
pcm		E1JJR3;Q9VWI1	E1JJR3;Q9VWI1	Ventral spn27A (4)	NaN	0.340296
Pp2A-29B		M9NDI6;H5V8B8	M9NDI6;H5V8B8	Ventral spn27A (4)	NaN	-0.578984
Cnot4		M9MRH8;Q8IPB9;Q9VKX1	M9MRH8;Q8IPB9;Q9VKX1	Ventral spn27A (4)	NaN	-1.08342
CG2061	LanC-like protein 3 homolog	M9PH85;Q9Y0Y7	M9PH85;Q9Y0Y7	Ventral spn27A (4)	NaN	0.301724
Ctr1A		M9NE97;Q9W3X9	M9NE97;Q9W3X9	Ventral spn27A (4)	NaN	-0.652154
CanA-14F	Serine/threonine-protein phosphatase;Serine/threonine-protein phosphatase 2B catalytic subunit 3	M9NEL1;Q9VXF1	M9NEL1;Q9VXF1	Ventral spn27A (4)	NaN	0.210661
kraken	Probable serine hydrolase	M9PBM0;O18391	M9PBM0;O18391	Ventral spn27A (4)	NaN	0.2521
NLaz		Q8SXR1;M9PBN2	Q8SXR1;M9PBN2	Ventral spn27A (4)	NaN	-1.05112
CG12272	WASH complex subunit strumpellin homolog	M9PCR4;Q9VUY8	M9PCR4;Q9VUY8	Ventral spn27A (4)	NaN	0.150749
Vps60;CG6259	Charged multivesicular body protein 5	M9PCV9;Q9VVI9	M9PCV9;Q9VVI9	Ventral spn27A (4)	NaN	0.255009
skd	Mediator of RNA polymerase II transcription subunit 13	M9PD50;Q7KTX8;A8JNW4	M9PD50;Q7KTX8;A8JNW4	Ventral spn27A (4)	NaN	0.274707
Tep4		M9PD73;M9PDF6;Q9VIT9;M9PDR0	M9PD73;M9PDF6;Q9VIT9;M9PDR0	Ventral spn27A (4)	NaN	-0.619498
Pmp70		M9PF96;Q9VWC8	M9PF96;Q9VWC8	Ventral spn27A (4)	NaN	0.302734
CG11448	RILP-like protein homolog	M9PG81;M9PGM0;O76878	M9PG81;M9PGM0;O76878	Ventral spn27A (4)	NaN	0.0773071
Tip60	Histone acetyltransferase;Histone acetyltransferase Tip60	M9PH08;M9PGN1;Q960X4	M9PH08;M9PGN1;Q960X4	Ventral spn27A (4)	NaN	-0.970477
Lsp1gamma	Larval serum protein 1 gamma chain	P11997	P11997	Ventral spn27A (4)	NaN	-0.509759
Pepck	Phosphoenolpyruvate carboxykinase [GTP]	P20007	P20007	Ventral spn27A (4)	NaN	-0.597764
tud	Maternal protein tudor	P25823;A0A0B4LG05	P25823;A0A0B4LG05	Ventral spn27A (4)	NaN	0.116642
Dbp73D	Probable ATP-dependent RNA helicase Dbp73D	P26802	P26802	Ventral spn27A (4)	NaN	-0.0606689
Xpac	DNA repair protein complementing XP-A cells homolog	P28518	P28518	Ventral spn27A (4)	NaN	0.17524
msl-3	Protein male-specific lethal-3	P50536	P50536	Ventral spn27A (4)	NaN	0.227572
scw	Protein screw	X2JB15;P54631	X2JB15;P54631	Ventral spn27A (4)	NaN	-0.901575
Nelf-E	Negative elongation factor E	P92204	P92204	Ventral spn27A (4)	NaN	0.200545
		Q0E8Q7;E1JHH7	Q0E8Q7	Ventral spn27A (4)	NaN	0.218315
Rbf	Retinoblastoma family protein	Q24472	Q24472	Ventral spn27A (4)	NaN	0.254018
svr		Q6AWJ5	Q6AWJ5	Ventral spn27A (4)	NaN	0.266095
		Q6NP91	Q6NP91	Ventral spn27A (4)	NaN	0.403245
		Q7JRC0	Q7JRC0	Ventral spn27A (4)	NaN	0.372849
Br140		Q7JVP4	Q7JVP4	Ventral spn27A (4)	NaN	0.316134
CG8078	Cytoplasmic tRNA 2-thiolation protein 1	Q7JWW5	Q7JWW5	Ventral spn27A (4)	NaN	-0.922537
CG9005-RA		Q7JXG9	Q7JXG9	Ventral spn27A (4)	NaN	0.0748704
		Q7K121	Q7K121	Ventral spn27A (4)	NaN	0.609942
		Q7K157	Q7K157	Ventral spn27A (4)	NaN	-1.12972
Sara		Q7K9H6	Q7K9H6	Ventral spn27A (4)	NaN	0.429699
Jheh2		Q7KB18	Q7KB18	Ventral spn27A (4)	NaN	0.0211173
Tsp42Ee	Tetraspanin	Q7KJ73	Q7KJ73	Ventral spn27A (4)	NaN	-0.552896
drosha		Q7KNF1	Q7KNF1	Ventral spn27A (4)	NaN	0.19046
Cyp12d1-d	Probable cytochrome P450 12d1 distal, mitochondrial	Q7KR10	Q7KR10	Ventral spn27A (4)	NaN	-0.80644
Csk	Non-specific protein-tyrosine kinase	Q7KSQ2;Q9VGK8;Q8INJ8	Q7KSQ2;Q9VGK8;Q8INJ8	Ventral spn27A (4)	NaN	0.439117
		Q8I937	Q8I937	Ventral spn27A (4)	NaN	-0.520005
CG13638		Q8MSB1	Q8MSB1	Ventral spn27A (4)	NaN	0.220142
Pgant35A	Polypeptide N-acetylgalactosaminyltransferase 35A	Q8MVS5	Q8MVS5	Ventral spn27A (4)	NaN	0.395012
mus210		A0A0B4K739	A0A0B4K739	Ventral spn27A (4)	NaN	0.549985
CG33181-RG		X2JE61;A8JV35;M9PHE6;Q9W3E3;A8JV32	X2JE61;A8JV35;M9PHE6;Q9W3E3;A8JV32	Ventral spn27A (4)	NaN	-0.964293
inc		Q9W579	Q9W579	Ventral spn27A (4)	NaN	0.250862
		Q9W4U2	Q9W4U2	Ventral spn27A (4)	NaN	0.00385571
		Q9W4G1	Q9W4G1	Ventral spn27A (4)	NaN	0.353298
		Q9W469	Q9W469	Ventral spn27A (4)	NaN	0.484942
		Q9W3K4	Q9W3K4	Ventral spn27A (4)	NaN	0.158273
		Q9W2T3	Q9W2T3	Ventral spn27A (4)	NaN	-0.80905
		Q9W293	Q9W293	Ventral spn27A (4)	NaN	0.268095
Aats-pro		Q9VZY9;M9PBJ9	Q9VZY9	Ventral spn27A (4)	NaN	0.38466
IntS10		Q9VZM7	Q9VZM7	Ventral spn27A (4)	NaN	0.311966
ida		Q9VZL2	Q9VZL2	Ventral spn27A (4)	NaN	0.235417
	Purple acid phosphatase	Q9VZ56;X2JB52	Q9VZ56;X2JB52	Ventral spn27A (4)	NaN	0.357401
		Q9VYK7	Q9VYK7	Ventral spn27A (4)	NaN	0.414512
		Q9VYA1;Q9I7S2	Q9VYA1	Ventral spn27A (4)	NaN	-0.0173535
opm		Q9VXY9	Q9VXY9	Ventral spn27A (4)	NaN	0.0273882
CG15914	Glycosyltransferase-like domain-containing protein 1-like	Q9VXN0	Q9VXN0	Ventral spn27A (4)	NaN	-0.58866
		Q9VXD6	Q9VXD6	Ventral spn27A (4)	NaN	0.328183
		Q9VX51;Q86B46	Q9VX51;Q86B46	Ventral spn27A (4)	NaN	0.170766
		Q9VWP5;R9PY26	Q9VWP5;R9PY26	Ventral spn27A (4)	NaN	0.194428
Usp39		Q9VWP1	Q9VWP1	Ventral spn27A (4)	NaN	0.29792
CG9706-RA		Q9VVA1	Q9VVA1	Ventral spn27A (4)	NaN	0.220866
mRpS34		Q9VV39	Q9VV39	Ventral spn27A (4)	NaN	0.484149
mRpS31		Q9VUX1	Q9VUX1	Ventral spn27A (4)	NaN	0.354719
AGO2	Protein argonaute-2	Q9VUQ5;M9PFK7;REV__O97365	Q9VUQ5;M9PFK7	Ventral spn27A (4)	NaN	0.239642
		Q9VUM3	Q9VUM3	Ventral spn27A (4)	NaN	0.471224
l(3)j2D3		Q9VTT2	Q9VTT2	Ventral spn27A (4)	NaN	0.408774
SuUR	Protein suppressor of underreplication	Q9VTE2	Q9VTE2	Ventral spn27A (4)	NaN	0.166029
path		Q9VT04;Q9VT03	Q9VT04;Q9VT03	Ventral spn27A (4)	NaN	0.106809
Use1	Vesicle transport protein USE1	Q9VSU7	Q9VSU7	Ventral spn27A (4)	NaN	0.244379
		Q9VSP0	Q9VSP0	Ventral spn27A (4)	NaN	0.343485
		Q9VSG9	Q9VSG9	Ventral spn27A (4)	NaN	0.239416
mus301		Q9VSE2	Q9VSE2	Ventral spn27A (4)	NaN	0.173093
CTCF		Q9VS55	Q9VS55	Ventral spn27A (4)	NaN	0.189782
CG13298	Splicing factor 3B subunit 6-like protein	Q9VRV7	Q9VRV7	Ventral spn27A (4)	NaN	-0.747467
Eaf6		Q9VRN3	Q9VRN3	Ventral spn27A (4)	NaN	0.483897
cactin	Cactin	Q9VR99	Q9VR99	Ventral spn27A (4)	NaN	0.192562
		Q9VR42	Q9VR42	Ventral spn27A (4)	NaN	0.39856
Bsg25A		Q9VR17	Q9VR17	Ventral spn27A (4)	NaN	0.167696
GABPI	Palmitoyltransferase	Q9VQK9	Q9VQK9	Ventral spn27A (4)	NaN	0.471816
		Q9VQJ6;Q8IPZ5	Q9VQJ6;Q8IPZ5	Ventral spn27A (4)	NaN	0.143343
		Q9VPU0	Q9VPU0	Ventral spn27A (4)	NaN	0.215891
		Q9VP87	Q9VP87	Ventral spn27A (4)	NaN	0.456738
CG7458-RA		Q9VNW8	Q9VNW8	Ventral spn27A (4)	NaN	0.359341
		Q9VNW1	Q9VNW1	Ventral spn27A (4)	NaN	0.307517
l(3)04053		Q9VNR6	Q9VNR6	Ventral spn27A (4)	NaN	0.278966
		Q9VL06	Q9VL06	Ventral spn27A (4)	NaN	0.556202
CG6488	Conserved oligomeric Golgi complex subunit 8	Q9VKH0	Q9VKH0	Ventral spn27A (4)	NaN	0.334133
		Q9VK44	Q9VK44	Ventral spn27A (4)	NaN	0.24954
		Q9VK28	Q9VK28	Ventral spn27A (4)	NaN	-0.436213
		Q9VJY3	Q9VJY3	Ventral spn27A (4)	NaN	-0.0444682
CG9267-RA		Q9VJX8	Q9VJX8	Ventral spn27A (4)	NaN	-0.694256
Sec71		Q9VJW1	Q9VJW1	Ventral spn27A (4)	NaN	0.431558
Swip-1	EF-hand domain-containing protein D2 homolog	X2J6X1;Q9VJ26	X2J6X1;Q9VJ26	Ventral spn27A (4)	NaN	0.399338
NTH1	Endonuclease III homolog	Q9VIH0	Q9VIH0	Ventral spn27A (4)	NaN	-0.917441
Dpck		Q9VI57	Q9VI57	Ventral spn27A (4)	NaN	0.102188
CG9630	Probable ATP-dependent RNA helicase DDX55 homolog	Q9VHU1	Q9VHU1	Ventral spn27A (4)	NaN	0.0668013
Sgt1		Q9VHT3	Q9VHT3	Ventral spn27A (4)	NaN	0.071919
		Q9VHN0	Q9VHN0	Ventral spn27A (4)	NaN	0.401641
JHDM2		Q9VHC5	Q9VHC5	Ventral spn27A (4)	NaN	-0.913191
CG6293-RA		Q9VH02	Q9VH02	Ventral spn27A (4)	NaN	-0.482521
CG5608-RA		Q9VG59	Q9VG59	Ventral spn27A (4)	NaN	0.399195
Arpc3A	Actin-related protein 2/3 complex subunit 3	Q9VF28	Q9VF28	Ventral spn27A (4)	NaN	0.234687
Dys	Dystrophin, isoforms A/C/F/G/H	Q9VDW6;A0A0B4KGB9;Q9VDW3;A0A0B4KHE2;Q7YU29	Q9VDW6	Ventral spn27A (4)	NaN	-0.592437
slmb		Q9VDE3;A0A0B4KHK1	Q9VDE3;A0A0B4KHK1	Ventral spn27A (4)	NaN	0.1885
lqfR		Q9VD13	Q9VD13	Ventral spn27A (4)	NaN	0.399962
EF-G2	Ribosome-releasing factor 2, mitochondrial	Q9VCX4;A0A0B4LIH0	Q9VCX4;A0A0B4LIH0	Ventral spn27A (4)	NaN	0.29328
		Q9VCD9	Q9VCD9	Ventral spn27A (4)	NaN	0.130593
CG13609	Protein PTOV1 homolog	Q9VCB1	Q9VCB1	Ventral spn27A (4)	NaN	0.358539
CG10057		Q9VBX5	Q9VBX5	Ventral spn27A (4)	NaN	0.400438
		Q9VBU4	Q9VBU4	Ventral spn27A (4)	NaN	0.24497
RpL27	60S ribosomal protein L27	Q9VBN5	Q9VBN5	Ventral spn27A (4)	NaN	-0.561711
CG6330-RB		Q9VBA0;Q8IMQ8	Q9VBA0;Q8IMQ8	Ventral spn27A (4)	NaN	-1.0009
WASp		Q9VAT0;Q86B74	Q9VAT0;Q86B74	Ventral spn27A (4)	NaN	0.151786
		Q9VAR0	Q9VAR0	Ventral spn27A (4)	NaN	0.204536
CG11837	Probable dimethyladenosine transferase	Q9VAQ5	Q9VAQ5	Ventral spn27A (4)	NaN	-0.142536
Brd8		Q9VAM5	Q9VAM5	Ventral spn27A (4)	NaN	0.13636
betaGlu	Beta-glucuronidase	Q9V9T9	Q9V9T9	Ventral spn27A (4)	NaN	-0.856634
RpL21		Q9V9M7	Q9V9M7	Ventral spn27A (4)	NaN	-0.680652
Fkbp14		Q9V3V2	Q9V3V2	Ventral spn27A (4)	NaN	0.33968
out		Q9V3F9	Q9V3F9	Ventral spn27A (4)	NaN	0.195629
lace		Q9V3F2	Q9V3F2	Ventral spn27A (4)	NaN	0.284353
Rich	Guanine nucleotide exchange factor subunit Rich	Q9V3C5	Q9V3C5	Ventral spn27A (4)	NaN	0.534233
Fadd	Fas-associated death domain protein	Q9V3B4	Q9V3B4	Ventral spn27A (4)	NaN	0.0311352
cmtr2	Cap-specific mRNA (nucleoside-2-O-)-methyltransferase 2	Q9UAS6	Q9UAS6	Ventral spn27A (4)	NaN	0.399361
ppl	Glycine cleavage system H protein, mitochondrial	Q9U616	Q9U616	Ventral spn27A (4)	NaN	-0.353048
xmas-2	Protein xmas-2	Q9U3V9	Q9U3V9	Ventral spn27A (4)	NaN	0.346662
eIF2D		Q9NG60	Q9NG60	Ventral spn27A (4)	NaN	0.274438
Sap47;Sap47-RI	Synapse-associated protein of 47 kDa	Q960T2;F3YDF6;A0A0B4LH71	Q960T2;F3YDF6;A0A0B4LH71	Ventral spn27A (4)	NaN	0.297082
Lhr		Q95RV3	Q95RV3	Ventral spn27A (4)	NaN	0.0970356
Pur-alpha		Q95RR6;F3YDK4	Q95RR6;F3YDK4	Ventral spn27A (4)	NaN	-0.626072
CG9328-RA		Q8T9H0;Q9VIJ3	Q8T9H0;Q9VIJ3	Ventral spn27A (4)	NaN	0.16597
Zyx		Q8T0F5;Q9N675	Q8T0F5;Q9N675	Ventral spn27A (4)	NaN	0.486123
CG10500		Q8SY25	Q8SY25	Ventral spn27A (4)	NaN	-0.529515
Mgstl		Q8SY19;Q8SY70	Q8SY19;Q8SY70	Ventral spn27A (4)	NaN	0.176993
CG14299	Ectopic P granules protein 5 homolog	A0A0B4K6N7;Q9VE34	A0A0B4K6N7;Q9VE34	Ventral spn27A (4)	NaN	0.174179
pps		Q9VG78;A0A0B4K6G3	Q9VG78;A0A0B4K6G3	Ventral spn27A (4)	NaN	0.255362
Sodh-2		O96299;O97479	O96299	Ventral Tl10B spn27A (5)	-0.846558	-0.528082
kni	Zygotic gap protein knirps	X2JGX8;P10734;P15370	X2JGX8;P10734	Ventral Tl10B spn27A (5)	-0.75662	-0.548245
		Q9VMP8	Q9VMP8	Ventral Tl10B spn27A (5)	-0.430021	-0.327104
ltl		Q9VS84	Q9VS84	Ventral Tl10B spn27A (5)	-0.78528	-0.108637
morgue		Q9Y165	Q9Y165	Ventral Tl10B spn27A (5)	-0.556422	-0.181723
mtrm	Protein matrimony	Q23973	Q23973	Ventral Tl10B spn27A (5)	-0.624671	-0.472214
stck		Q9XYA7;Q8INR0;Q8INQ9	Q9XYA7;Q8INR0;Q8INQ9	Ventral Tl10B spn27A (5)	0.347792	0.087571
LanB1	Laminin subunit beta-1	P11046	P11046	Ventral Tl10B spn27A (5)	0.441024	0.482738
alpha-Est1		Q9VIC3	Q9VIC3	Ventral Tl10B spn27A (5)	0.0406208	0.0384704
CG12945-RB		Q9VH65;A0A0B4KFJ0	Q9VH65;A0A0B4KFJ0	Ventral Tl10B spn27A (5)	0.042	-0.0672288
		Q9VC40	Q9VC40	Ventral Tl10B spn27A (5)	-0.129585	-0.0641437
Dredd	Caspase-8;Caspase-8 subunit p15;Caspase-8 subunit p10	X2JHT0;Q8IRY7	X2JHT0;Q8IRY7	Ventral Tl10B spn27A (5)	-0.0322838	-0.190468
		Q8IGV3	Q8IGV3	Ventral Tl10B spn27A (5)	0.0413163	0.0308969
Hdac3	Histone deacetylase	Q7KTS4	Q7KTS4	Ventral Tl10B spn27A (5)	0.252615	0.179375
pre-mod(mdg4)-W		A0A0B4JCZ3	A0A0B4JCZ3	Ventral Tl10B spn27A (5)	-0.771382	-0.784745
Patronin	Patronin	A0A0B4KG58;B7YZJ2;E1JH90;A0A0B4KET5;A0A0B4KFA4;E1JH91;A0A0B4KEY4;A0A0B4KFU3;B7YZJ1;A1ZAU8;A0A0B4KEY6	A0A0B4KG58;B7YZJ2;E1JH90;A0A0B4KET5;A0A0B4KFA4;E1JH91;A0A0B4KEY4;A0A0B4KFU3;B7YZJ1;A1ZAU8;A0A0B4KEY6	Ventral Tl10B spn27A (5)	0.347932	0.24709
Tab2		A0A0B4KG87;Q6NQZ7	A0A0B4KG87;Q6NQZ7	Ventral Tl10B spn27A (5)	0.326632	0.310677
TAF1B;CG6241	TATA box-binding protein-associated factor RNA polymerase I subunit B	A0A0B4KH26;Q9VH20;A0A0B4KG32	A0A0B4KH26;Q9VH20;A0A0B4KG32	Ventral Tl10B spn27A (5)	0.386958	0.475986
Mpc1	Mitochondrial pyruvate carrier 1	A0A0B4KHD3;Q7KSC4	A0A0B4KHD3;Q7KSC4	Ventral Tl10B spn27A (5)	0.321215	0.236796
CG7218	Protein TAPT1 homolog	A0A0B4LH99;Q9VED0	A0A0B4LH99;Q9VED0	Ventral Tl10B spn27A (5)	0.238703	0.242726
Inx3	Innexin;Innexin inx3	A0A0B4LHT3;Q9VAS7	A0A0B4LHT3;Q9VAS7	Ventral Tl10B spn27A (5)	-0.48473	-0.518934
CG8026-RB		Q95T49;A1Z7S4;C9QPE2	Q95T49;A1Z7S4;C9QPE2	Ventral Tl10B spn27A (5)	0.254586	-0.244761
Syx5	Syntaxin-5	A4V0S1;Q24509	A4V0S1;Q24509	Ventral Tl10B spn27A (5)	0.384238	0.361511
		A8JV07	A8JV07	Ventral Tl10B spn27A (5)	0.465964	0.486672
RpS14b		X2JCX8;C0HKA1;C0HKA0	X2JCX8;C0HKA1;C0HKA0	Ventral Tl10B spn27A (5)	-0.538584	-0.598285
CG5021	Golgi apparatus membrane protein TVP23 homolog;Uncharacterized Golgi apparatus membrane protein-like protein CG5021	E1JI84;Q8IQC1	E1JI84;Q8IQC1	Ventral Tl10B spn27A (5)	0.483763	0.469474
Kmn2		E1JJ86;Q6IKI1	E1JJ86;Q6IKI1	Ventral Tl10B spn27A (5)	-0.520111	-0.61407
CG1129	Mannose-1-phosphate guanyltransferase beta	E2QCZ9;Q7JZB4	E2QCZ9;Q7JZB4	Ventral Tl10B spn27A (5)	-0.684512	-0.647748
tweek		M9MSI8;M9MRP6;M9MRV1;M9MRK7;X2JAP2;X2JA38	M9MSI8;M9MRP6;M9MRV1;M9MRK7;X2JAP2;X2JA38	Ventral Tl10B spn27A (5)	-0.775212	-0.938791
		X2J9V7;Q8IPG6;M9PCI1	X2J9V7;Q8IPG6;M9PCI1	Ventral Tl10B spn27A (5)	-0.867611	-1.02566
RhoBTB		M9PIB5;Q9VPG7;M9PG08	M9PIB5;Q9VPG7;M9PG08	Ventral Tl10B spn27A (5)	0.368194	0.319147
JIL-1	Chromosomal serine/threonine-protein kinase JIL-1	M9PI05;Q9V3I5	M9PI05;Q9V3I5	Ventral Tl10B spn27A (5)	-0.453595	-0.519847
Ip259		O76994	O76994	Ventral Tl10B spn27A (5)	-0.944982	-0.855574
RnrS	Ribonucleoside-diphosphate reductase subunit M2	P48592	P48592	Ventral Tl10B spn27A (5)	0.392709	0.419464
Wsck	Putative tyrosine-protein kinase Wsck	P83097	P83097	Ventral Tl10B spn27A (5)	-0.739705	-0.644975
Arl2	ADP-ribosylation factor-like protein 2	Q06849	Q06849	Ventral Tl10B spn27A (5)	0.207164	0.210839
mRpL34	39S ribosomal protein L34, mitochondrial	Q0E959	Q0E959	Ventral Tl10B spn27A (5)	0.407441	0.120018
Iap2	Apoptosis 2 inhibitor	Q24307	Q24307	Ventral Tl10B spn27A (5)	-0.697806	-0.66291
		Q29QN4	Q29QN4	Ventral Tl10B spn27A (5)	0.409494	0.370643
UQCR-6.4		Q500Y7	Q500Y7	Ventral Tl10B spn27A (5)	-0.585496	-0.649448
		Q6IL18	Q6IL18	Ventral Tl10B spn27A (5)	0.301019	-0.0106302
Reep1	Receptor expression-enhancing protein	Q7JRH2;A0A0B4LG73	Q7JRH2	Ventral Tl10B spn27A (5)	0.441929	0.34662
		Q7JYQ4	Q7JYQ4	Ventral Tl10B spn27A (5)	0.125984	0.111043
		Q7K264	Q7K264	Ventral Tl10B spn27A (5)	0.487353	0.388565
		Q7K4L9	Q7K4L9	Ventral Tl10B spn27A (5)	-0.879954	-0.873131
PNUTS		Q7KU01;Q9VPU9	Q7KU01;Q9VPU9	Ventral Tl10B spn27A (5)	0.37482	0.365846
ND-AGGG		Q7PL91	Q7PL91	Ventral Tl10B spn27A (5)	0.28144	0.266533
		Q8I079	Q8I079	Ventral Tl10B spn27A (5)	0.790516	0.348575
CG5484-RA;CG5484-RB		Q8IMR4;Q9VBC5;Q8IMR3	Q8IMR4;Q9VBC5;Q8IMR3	Ventral Tl10B spn27A (5)	-0.84932	-0.816636
		Q8IPT1;Q8IPT0	Q8IPT1;Q8IPT0	Ventral Tl10B spn27A (5)	-0.559235	-0.490587
		Q8IQT0;M9PCW9	Q8IQT0;M9PCW9	Ventral Tl10B spn27A (5)	-0.517963	-0.784778
		Q8MZ22	Q8MZ22	Ventral Tl10B spn27A (5)	-1.34395	-1.20328
		Q8SXU0	Q8SXU0	Ventral Tl10B spn27A (5)	0.300029	0.255257
ATPsynbetaL	ATP synthase subunit beta	Q8T4C4	Q8T4C4	Ventral Tl10B spn27A (5)	-0.503925	-0.642615
		Q95SH7	Q95SH7	Ventral Tl10B spn27A (5)	0.405217	0.405343
		Q9I7J4;Q961C8	Q9I7J4;Q961C8	Ventral Tl10B spn27A (5)	-0.421059	-0.594204
sbr	Nuclear RNA export factor 1	Q9U1H9	Q9U1H9	Ventral Tl10B spn27A (5)	0.293405	0.331893
RpL8	60S ribosomal protein L8	Q9V3G1	Q9V3G1	Ventral Tl10B spn27A (5)	-0.72341	-0.697347
CG4500	Long-chain-fatty-acid--CoA ligase bubblegum-like	Q9V3U0	Q9V3U0	Ventral Tl10B spn27A (5)	-1.47269	-0.179706
bip2		Q9V4D4	Q9V4D4	Ventral Tl10B spn27A (5)	0.446226	0.506025
Jupiter;Clamp		Q9V9N4;Q8IGP5;M9PIL6;M9PG92;Q7KAH0;M9NFP1;M9PGG2	Q9V9N4;Q8IGP5	Ventral Tl10B spn27A (5)	0.339702	0.289562
jigr1		Q9VBP5;Q9VIM6	Q9VBP5	Ventral Tl10B spn27A (5)	0.264429	0.148814
		Q9VBV8	Q9VBV8	Ventral Tl10B spn27A (5)	-0.572598	-0.501955
Ino80	Putative DNA helicase Ino80	Q9VDY1	Q9VDY1	Ventral Tl10B spn27A (5)	0.297888	0.387998
Men	Malic enzyme	Q9VG31;Q9VG32;Q2QBM1	Q9VG31;Q9VG32;Q2QBM1	Ventral Tl10B spn27A (5)	0.282972	0.353992
Tango9		Q9VGF5	Q9VGF5	Ventral Tl10B spn27A (5)	-0.837747	-0.708206
Sirt6	NAD-dependent protein deacetylase Sirt6	Q9VH08	Q9VH08	Ventral Tl10B spn27A (5)	-0.728222	-0.698621
ird1		Q9VHH2;A0A0B4KGX5	Q9VHH2;A0A0B4KGX5	Ventral Tl10B spn27A (5)	0.368051	0.419352
		Q9VJ04	Q9VJ04	Ventral Tl10B spn27A (5)	0.185938	0.197551
CG6770-RA		Q9VKC5	Q9VKC5	Ventral Tl10B spn27A (5)	-0.842598	-0.872328
Rcd4		Q9VLM6	Q9VLM6	Ventral Tl10B spn27A (5)	0.524052	0.239007
		Q9VMQ6	Q9VMQ6	Ventral Tl10B spn27A (5)	-0.901232	-0.835145
Bub1		Q9VMS5	Q9VMS5	Ventral Tl10B spn27A (5)	0.345509	0.316818
		Q9VNX9	Q9VNX9	Ventral Tl10B spn27A (5)	0.853099	0.50145
CG11399-RB		Q9VPB7	Q9VPB7	Ventral Tl10B spn27A (5)	-0.653226	-0.684814
		Q9VQ34	Q9VQ34	Ventral Tl10B spn27A (5)	0.230455	0.228652
		Q9VQL2	Q9VQL2	Ventral Tl10B spn27A (5)	-0.685279	-0.69438
		Q9VS52	Q9VS52	Ventral Tl10B spn27A (5)	0.397202	0.225516
Vps36	Vacuolar protein-sorting-associated protein 36	Q9VU87	Q9VU87	Ventral Tl10B spn27A (5)	-0.0098315	-0.0732038
		Q9VVH3	Q9VVH3	Ventral Tl10B spn27A (5)	-0.688343	-0.647887
		Q9VXT0	Q9VXT0	Ventral Tl10B spn27A (5)	0.448305	1.06116
	Branched-chain-amino-acid aminotransferase	Q9VYD5	Q9VYD5	Ventral Tl10B spn27A (5)	-0.418091	0.0160059
mRpS35		Q9VZX6;REV__A1Z9E4	Q9VZX6	Ventral Tl10B spn27A (5)	0.298319	0.26689
yellow-g		Q9W029	Q9W029	Ventral Tl10B spn27A (5)	0.44509	0.363263
Pi3K59F	Phosphatidylinositol 3-kinase	Q9W1M7	Q9W1M7	Ventral Tl10B spn27A (5)	0.171269	0.114265
Tango5		Q9W2S1;Q7KVQ7	Q9W2S1;Q7KVQ7	Ventral Tl10B spn27A (5)	-0.601917	-0.493142
Hexo2		Q9W3C4	Q9W3C4	Ventral Tl10B spn27A (5)	-0.911648	-0.908827
CG3781	Josephin-like protein	Q9W422	Q9W422	Ventral Tl10B spn27A (5)	-0.651301	-0.720026
CG3527	Ribosomal RNA small subunit methyltransferase NEP1	Q9W4J5	Q9W4J5	Ventral Tl10B spn27A (5)	-0.546864	-0.487447
betaggt-II		Q9XZ68	Q9XZ68	Ventral Tl10B spn27A (5)	0.331091	0.244242
		X2JCX4	X2JCX4	Ventral Tl10B spn27A (5)	0.555129	0.316299
MED18	Mediator of RNA polymerase II transcription subunit 18	Q9XZT1;B7Z116	Q9XZT1	Ventral Tl10B spn27A (5)	-0.663126	-0.51843
		Q9W4J7	Q9W4J7	Ventral Tl10B spn27A (5)	0.174985	0.130313
		X2JE64;Q9W4D4	X2JE64;Q9W4D4	Ventral Tl10B spn27A (5)	0.509388	0.217817
		Q9W3F5	Q9W3F5	Ventral Tl10B spn27A (5)	-0.546284	-0.684571
		Q9W3C3	Q9W3C3	Ventral Tl10B spn27A (5)	-0.50107	-0.446159
		Q9W2B3	Q9W2B3	Ventral Tl10B spn27A (5)	0.465746	0.566303
CG4692	Putative ATP synthase subunit f, mitochondrial	Q9W141	Q9W141	Ventral Tl10B spn27A (5)	-0.646019	-0.685545
yellow-g2		Q9W028	Q9W028	Ventral Tl10B spn27A (5)	-0.715329	-0.699943
Mul1		Q9VZJ9	Q9VZJ9	Ventral Tl10B spn27A (5)	-0.534863	-0.442249
		Q9VY02	Q9VY02	Ventral Tl10B spn27A (5)	0.337992	0.377111
		Q9VVU6	Q9VVU6	Ventral Tl10B spn27A (5)	0.494163	0.447589
		Q9VVD3	Q9VVD3	Ventral Tl10B spn27A (5)	0.561078	0.582933
		Q9VUC3	Q9VUC3	Ventral Tl10B spn27A (5)	0.107308	0.259404
vnc		Q9VT75	Q9VT75	Ventral Tl10B spn27A (5)	-0.468641	-0.668449
		Q9VQY7	Q9VQY7	Ventral Tl10B spn27A (5)	-0.683362	-0.6589
Cwc25		Q9VQF5	Q9VQF5	Ventral Tl10B spn27A (5)	0.427469	0.467654
cold		Q9VPR7	Q9VPR7	Ventral Tl10B spn27A (5)	0.112222	0.106021
CG12975	Multifunctional methyltransferase subunit TRM112-like protein	Q9VP65	Q9VP65	Ventral Tl10B spn27A (5)	-0.669075	-0.664917
		Q9VN39;Q8T0Q2	Q9VN39;Q8T0Q2	Ventral Tl10B spn27A (5)	0.554462	0.485726
CG7371-RA		Q9VMQ8	Q9VMQ8	Ventral Tl10B spn27A (5)	0.396574	0.49759
Mnn1		Q9VM47;Q8SXU2	Q9VM47;Q8SXU2	Ventral Tl10B spn27A (5)	0.511901	0.495301
FucTB	Alpha-(1,3)-fucosyltransferase B	X2J5D8;Q9VLC1;B9EQY2	X2J5D8;Q9VLC1;B9EQY2	Ventral Tl10B spn27A (5)	-1.18025	-1.0787
		Q9VK90;M9PBA6	Q9VK90;M9PBA6	Ventral Tl10B spn27A (5)	0.471008	0.37735
		Q9VI70	Q9VI70	Ventral Tl10B spn27A (5)	0.404748	0.398651
gammaSnap2		Q9VH25	Q9VH25	Ventral Tl10B spn27A (5)	0.502133	0.320019
Adk3	GTP:AMP phosphotransferase, mitochondrial	Q9VGU6;REV__Q9VZS5;REV__D1Z3A1	Q9VGU6	Ventral Tl10B spn27A (5)	-0.753565	-0.745898
		Q9VGE3	Q9VGE3	Ventral Tl10B spn27A (5)	-0.42497	-0.647313
		Q9VFJ1	Q9VFJ1	Ventral Tl10B spn27A (5)	-0.673471	-0.678048
trem		Q9VDQ4	Q9VDQ4	Ventral Tl10B spn27A (5)	-0.476162	-0.581281
MED28	Mediator of RNA polymerase II transcription subunit 28	Q9VBQ9	Q9VBQ9	Ventral Tl10B spn27A (5)	-0.362824	-0.374786
		Q9VBC4	Q9VBC4	Ventral Tl10B spn27A (5)	0.478892	0.313244
CG5189	Ragulator complex protein LAMTOR2 homolog	Q9V8I2	Q9V8I2	Ventral Tl10B spn27A (5)	0.361936	0.529741
CG11076-RA		Q9V493;Q7KQM8	Q9V493;Q7KQM8	Ventral Tl10B spn27A (5)	0.220825	0.349008
mus81		Q9V3T1	Q9V3T1	Ventral Tl10B spn27A (5)	0.321217	0.353151
Surf1	SURF1-like protein	Q9U4F3	Q9U4F3	Ventral Tl10B spn27A (5)	0.261755	0.257969
BcDNA.GH02384		Q9Y168;Q9I7L9	Q9Y168;Q9I7L9	Ventral Tl10B spn27A (5)	-0.599138	-0.519135
Hrs	Hepatocyte growth factor-regulated tyrosine kinase substrate	Q960X8	Q960X8	Ventral Tl10B spn27A (5)	0.31968	0.327452
ifc		Q94515;M9PC47	Q94515	Ventral Tl10B spn27A (5)	-0.645688	-0.625457
MESK2		Q8T0V2;Q7KVN1;Q9I7V7;Q9I7V6	Q8T0V2;Q7KVN1;Q9I7V7;Q9I7V6	Ventral Tl10B spn27A (5)	0.3564	0.385828
SNF4Agamma		Q8SXT8	Q8SXT8	Ventral Tl10B spn27A (5)	0.291143	0.120149
mRpL35	39S ribosomal protein L35, mitochondrial	Q8MS27	Q8MS27	Ventral Tl10B spn27A (5)	0.443637	0.208824
		Q8IQI5;Q8IQI4	Q8IQI5;Q8IQI4	Ventral Tl10B spn27A (5)	-0.582548	-0.491397
wfs1		Q8IMZ9;A0A0B4JDG5	Q8IMZ9;A0A0B4JDG5	Ventral Tl10B spn27A (5)	-0.739795	-0.764833
CG5815	Protein SPT2 homolog	Q8IMP6	Q8IMP6	Ventral Tl10B spn27A (5)	0.026808	-0.547426
IntS3	Integrator complex subunit 3 homolog	Q7PLS8	Q7PLS8	Ventral Tl10B spn27A (5)	0.423594	0.423543
AlkB		Q7KUZ2	Q7KUZ2	Ventral Tl10B spn27A (5)	-0.98199	-1.16553
Ercc1		Q7KMG7	Q7KMG7	Ventral Tl10B spn27A (5)	0.108808	0.161149
L		Q7JXA2	Q7JXA2	Ventral Tl10B spn27A (5)	0.647285	0.400913
Syx6		Q86P32;Q7JRF1;Q7JY00	Q86P32;Q7JRF1;Q7JY00	Ventral Tl10B spn27A (5)	0.854745	0.373823
AcCoAS	Acetyl-coenzyme A synthetase	Q59E09;Q9VP61	Q59E09;Q9VP61	Ventral Tl10B spn27A (5)	-0.909905	-0.979292
		Q4QPR8	Q4QPR8	Ventral Tl10B spn27A (5)	0.288301	0.28753
l(2)dtl	Protein lethal(2)denticleless	Q24371	Q24371	Ventral Tl10B spn27A (5)	0.365619	0.298125
RpS11	40S ribosomal protein S11	Q0E9B6;A1Z8U9	Q0E9B6;A1Z8U9	Ventral Tl10B spn27A (5)	-0.559028	-0.550884
Dgp-1		Q0E931	Q0E931	Ventral Tl10B spn27A (5)	-0.692099	-0.788277
Mdr49	Multidrug resistance protein homolog 49	Q00449;E1JH49	Q00449;E1JH49	Ventral Tl10B spn27A (5)	-1.23415	-0.474874
RpL9	60S ribosomal protein L9	X2JDU0;P50882	X2JDU0;P50882	Ventral Tl10B spn27A (5)	-0.569381	-0.579902
mt:Cyt-b	Cytochrome b	P18935	P18935	Ventral Tl10B spn27A (5)	-0.740014	-0.796177
CG4061	RNA 3-terminal phosphate cyclase	X2JI07;O77264	X2JI07;O77264	Ventral Tl10B spn27A (5)	-0.512299	-0.584529
		M9PIC3;Q9VPD3	M9PIC3;Q9VPD3	Ventral Tl10B spn27A (5)	-0.500486	-0.60873
RpL18	60S ribosomal protein L18	M9PHM6;Q9VS34	M9PHM6;Q9VS34	Ventral Tl10B spn27A (5)	-0.678577	-0.662336
vir-1		Q8SXD5;M9PFQ2;Q0E8R1	Q8SXD5;M9PFQ2;Q0E8R1	Ventral Tl10B spn27A (5)	-1.02566	-1.05724
U2af38	Splicing factor U2af 38 kDa subunit	M9PBM1;Q94535	M9PBM1;Q94535	Ventral Tl10B spn27A (5)	0.562808	0.401664
		M9NCT3;Q9VKL9;M9NEE5;Q8IPB2	M9NCT3;Q9VKL9;M9NEE5;Q8IPB2	Ventral Tl10B spn27A (5)	-0.794963	-0.813215
RpL37A	60S ribosomal protein L37a	M9MRF2;Q9VMU4	M9MRF2;Q9VMU4	Ventral Tl10B spn27A (5)	-0.707349	-0.676769
BicC	Protein bicaudal C	E2QCR4;Q24009	E2QCR4;Q24009	Ventral Tl10B spn27A (5)	-0.418651	-0.32603
		E1JIZ7	E1JIZ7	Ventral Tl10B spn27A (5)	0.874928	0.461517
CdGAPr	GTPase-activating protein CdGAPr	E1JHM1;M9PDR8;Q9VIS1;E1JHM0	E1JHM1;M9PDR8;Q9VIS1;E1JHM0	Ventral Tl10B spn27A (5)	0.40245	0.404331
UQCR-11	Cytochrome b-c1 complex subunit 6	A8Y535	A8Y535	Ventral Tl10B spn27A (5)	0.187134	0.288159
Traf4		A8DYU9;Q9XYR0	A8DYU9;Q9XYR0	Ventral Tl10B spn27A (5)	-1.01597	-1.00568
app	Palmitoyltransferase	A2VEY9;Q9VTV6	A2VEY9;Q9VTV6	Ventral Tl10B spn27A (5)	-0.806412	-0.990542
beta3GalTII		A1Z7G9	A1Z7G9	Ventral Tl10B spn27A (5)	-0.479877	-0.537009
CG6982-RC		Q9VCV1;A0A0B4LHK8	Q9VCV1;A0A0B4LHK8	Ventral Tl10B spn27A (5)	-0.779177	-0.811323
Amy-p;Amy-d	Alpha-amylase;Alpha-amylase B;Alpha-amylase A	A0A0B4LGS0;P81641;P08144	A0A0B4LGS0;P81641;P08144	Ventral Tl10B spn27A (5)	1.82122	0.560969
		A0A0B4LFF6;Q7K3C2	A0A0B4LFF6;Q7K3C2	Ventral Tl10B spn27A (5)	0.0649873	0.687817
		A0A0B4KH87;Q9VAT1	A0A0B4KH87;Q9VAT1	Ventral Tl10B spn27A (5)	0.257927	0.169153
l(3)neo38-RA;l(3)neo38		E0R905;Q7KSP5;A0A0B4KGA3;A0A0B4K6S1;A0A0B4K6F4;Q8SZN9	E0R905;Q7KSP5;A0A0B4KGA3;A0A0B4K6S1;A0A0B4K6F4;Q8SZN9	Ventral Tl10B spn27A (5)	-0.494857	-0.726659
RanBPM		A0A0B4KFL0	A0A0B4KFL0	Ventral Tl10B spn27A (5)	0.517921	0.393005
Tfb1	General transcription factor IIH subunit 1	A0A0B4K726;Q960E8	A0A0B4K726;Q960E8	Ventral Tl10B spn27A (5)	0.429845	0.360854
CG2246-RB;CG2246-RA		A0A0B4JD23;Q8IMI0;A0A0B4JDE3;Q9VA53;A0A0B4KHJ3;A0A0B4KHF5	A0A0B4JD23;Q8IMI0;A0A0B4JDE3;Q9VA53;A0A0B4KHJ3;A0A0B4KHF5	Ventral Tl10B spn27A (5)	-0.41389	-0.565429
		Q9VKJ5	Q9VKJ5	Ventral Tl10B spn27A (5)	-0.538156	-0.775308
CG17327-RA		Q9VG06	Q9VG06	Ventral Tl10B spn27A (5)	-0.244858	-0.522375
		Q9VEM0	Q9VEM0	Ventral Tl10B spn27A (5)	-0.338027	-0.562185
		Q5BI03	Q5BI03	Ventral Tl10B spn27A (5)	-0.269013	-0.439477
His2A:CG33859;His2A	Histone H2A	Q4AB57;P84051	Q4AB57;P84051	Ventral Tl10B spn27A (5)	-0.371655	-0.646662
S	Protein Star	A4UZY2;P42519	A4UZY2;P42519	Ventral Tl10B spn27A (5)	-0.395596	-0.649811
U26	Acyl-CoA synthetase family member 4 homolog	Q9VLL0;X2J591	Q9VLL0	Ventral Tl10B spn27A (5)	-0.436904	-0.649525
		Q9VWN9	Q9VWN9	Ventral Tl10B spn27A (5)	-0.260502	-0.440337
		Q9VA79	Q9VA79	Ventral Tl10B spn27A (5)	-0.0211053	-0.105302
Idgf3	Chitinase-like protein Idgf3	Q8MLZ7;X2JA18;REV__O76460	Q8MLZ7;X2JA18	Ventral Tl10B spn27A (5)	0.111616	-0.204956
		Q9VB17	Q9VB17	Ventral Tl10B spn27A (5)	-0.0602131	-0.095616
neur	Protein neuralized	E1JIG1;P29503	E1JIG1;P29503	Ventral Tl10B spn27A (5)	-0.208981	-0.136938
Pomp		Q9VIJ5	Q9VIJ5	Ventral Tl10B spn27A (5)	0.283497	0.535568
EG:100G10.6		Q9W4W7	Q9W4W7	Ventral Tl10B spn27A (5)	0.286292	0.10869
spartin	Protein spartin	A0A0B4K6I5;Q9VN45	A0A0B4K6I5;Q9VN45	Ventral Tl10B spn27A (5)	0.0445257	-0.15647
m-cup		A0A0B4KHA0;Q9I7J2	A0A0B4KHA0;Q9I7J2	Dorsal + Lateral (6)	0.220813	0.214185
Unc-115a		A0A0B4LGY0;A0A0B4LGZ0;Q9VH91;E1JIH1;A0A0B4LI11;A0A0B4LGY1;E1JIH2;E1JIH3	A0A0B4LGY0;A0A0B4LGZ0;Q9VH91;E1JIH1;A0A0B4LI11;A0A0B4LGY1;E1JIH2;E1JIH3	Dorsal + Lateral (6)	NaN	0.181569
		Q9VWF8	Q9VWF8	Dorsal + Lateral (6)	0.0603288	0.0692585
		Q9W0J9	Q9W0J9	Dorsal + Lateral (6)	0.429442	0.426063
Lsp2	Larval serum protein 2	X2JCV2;Q24388	X2JCV2;Q24388	Dorsal + Lateral (6)	1.02652	0.986637
		Q9VHW0	Q9VHW0	Dorsal + Lateral (6)	0.4936	0.562501
		Q9VL67	Q9VL67	Dorsal + Lateral (6)	0.695066	0.582946
Vti1		Q9W0N6	Q9W0N6	Dorsal + Lateral (6)	0.525423	0.523755
		Q8T4D6	Q8T4D6	Dorsal + Lateral (6)	NaN	0.0997259
Sam-S	S-adenosylmethionine synthase	A4UZW2;E4NKH6;M9PAY2;REV__O96827;REV__A0A0B4LFL3	A4UZW2	Dorsal + Lateral (6)	NaN	0.193038
z	Regulatory protein zeste	Q7YU84;M9PIU6;P09956	Q7YU84;M9PIU6;P09956	Dorsal + Lateral (6)	0.0661669	0.0751513
		Q9VR30	Q9VR30	Dorsal + Lateral (6)	0.115438	0.0999697
		Q9VQU0	Q9VQU0	Dorsal + Lateral (6)	0.0981726	0.0366348
		M9PCQ7;M9PCB8;M9PB51;M9PC63;A8DYW2;M9PCC2;Q9VMA9;M9PEV6	M9PCQ7;M9PCB8;M9PB51;M9PC63;A8DYW2;M9PCC2;Q9VMA9;M9PEV6	Dorsal + Lateral (6)	0.495722	0.503753
CG12896-RA		A1Z893	A1Z893	Dorsal + Lateral (6)	0.827388	0.839658
gpp	Histone-lysine N-methyltransferase, H3 lysine-79 specific	A0A0B4KFP4;Q8INR6	A0A0B4KFP4;Q8INR6	Dorsal + Lateral (6)	0.738356	0.838501
Ets97D	DNA-binding protein Ets97D	A0A0B4KHY6;Q04688	A0A0B4KHY6;Q04688	Dorsal + Lateral (6)	NaN	0.684586
DOR		Q9VZC7;M9NFM7;A8JNK7;Q8IRB4	Q9VZC7;M9NFM7;A8JNK7;Q8IRB4	Dorsal + Lateral (6)	NaN	1.44731
CG5568		M9PEA1;Q9VRQ5	M9PEA1;Q9VRQ5	Dorsal + Lateral (6)	0.764876	0.873925
D;Sox21a;Sox21b	SOX domain-containing protein dichaete	M9PFL2;Q24533;Q9VUD1;M9PFG6;Q9VUD3;M9PCG2	M9PFL2;Q24533;Q9VUD1;M9PFG6;Q9VUD3;M9PCG2	Dorsal + Lateral (6)	0.774345	0.881492
Idh	Isocitrate dehydrogenase [NADP]	Q7KUB1	Q7KUB1	Dorsal + Lateral (6)	NaN	1.40036
		Q8MKJ6	Q8MKJ6	Dorsal + Lateral (6)	0.346237	0.514088
		Q9VMR0	Q9VMR0	Dorsal + Lateral (6)	0.413684	0.499547
		Q9VZ24	Q9VZ24	Dorsal + Lateral (6)	NaN	0.695604
Spx		Q9W424	Q9W424	Dorsal + Lateral (6)	0.515896	0.667502
Mct1		Q9W509	Q9W509	Dorsal + Lateral (6)	0.898474	1.00896
18w		A1ZBR2	A1ZBR2	Dorsal + Lateral (6)	0.597058	0.700488
CG33672-RA		A1Z933	A1Z933	Dorsal + Lateral (6)	0.505239	0.543455
Nplp2	Neuropeptide-like 2	X2JB24;A0A0S0WH10;Q9VU58	X2JB24;A0A0S0WH10;Q9VU58	Dorsal + Lateral (6)	0.578372	0.74917
CG4091	Tumor necrosis factor alpha-induced protein 8-like protein	A0A0C4DHD1;Q7KVH9	A0A0C4DHD1;Q7KVH9	Dorsal + Lateral (6)	0.745655	0.872787
		A0A0B4K7D8;Q7K161	A0A0B4K7D8;Q7K161	Dorsal + Lateral (6)	-0.374889	-0.350641
Nek2		Q9W3N8	Q9W3N8	Dorsal + Lateral (6)	-0.0106874	-0.0710103
mxc		Q9W363	Q9W363	Dorsal + Lateral (6)	0.539042	0.643891
Magi		Q9W2L2	Q9W2L2	Dorsal + Lateral (6)	0.526994	0.465884
		Q9W042;Q8IRF6	Q9W042;Q8IRF6	Dorsal + Lateral (6)	0.50928	0.460519
Ccz1		Q9VZL5	Q9VZL5	Dorsal + Lateral (6)	-0.32756	-0.330879
PMP34		Q9VZD9	Q9VZD9	Dorsal + Lateral (6)	0.596868	0.683445
CG9213	CWF19-like protein 2 homolog	X2JKF2;Q9VXT5	X2JKF2;Q9VXT5	Dorsal + Lateral (6)	0.56234	0.556361
	Putative rRNA methyltransferase	Q9VXK5	Q9VXK5	Dorsal + Lateral (6)	-0.434666	-0.346269
		Q9VW38	Q9VW38	Dorsal + Lateral (6)	-0.174458	-0.16503
DCP2		Q9VUU4;Q86NM7	Q9VUU4;Q86NM7	Dorsal + Lateral (6)	0.266553	0.284017
upSET		Q9VUB5	Q9VUB5	Dorsal + Lateral (6)	0.607174	0.680582
		Q9VT73	Q9VT73	Dorsal + Lateral (6)	1.01447	1.05588
		Q9VRT6	Q9VRT6	Dorsal + Lateral (6)	NaN	-0.310259
		Q9VRP2	Q9VRP2	Dorsal + Lateral (6)	-0.367127	-0.314386
Psf2	Probable DNA replication complex GINS protein PSF2	Q9VQY9	Q9VQY9	Dorsal + Lateral (6)	-0.382781	-0.302629
		Q9VQB4	Q9VQB4	Dorsal + Lateral (6)	0.807371	0.823927
Npc2a	Protein NPC2 homolog	Q9VQ62	Q9VQ62	Dorsal + Lateral (6)	0.00503728	0.0157921
mTerf3		Q9VPD5	Q9VPD5	Dorsal + Lateral (6)	0.719867	0.737915
		Q9VP69	Q9VP69	Dorsal + Lateral (6)	0.668265	0.685923
CG9551		Q9VMC3	Q9VMC3	Dorsal + Lateral (6)	-0.251991	-0.233491
		Q9VM51	Q9VM51	Dorsal + Lateral (6)	0.539013	0.495059
ssp3		X2J6U8;Q9VJ35	X2J6U8;Q9VJ35	Dorsal + Lateral (6)	0.56318	0.530458
CG17544-RA	Acyl-coenzyme A oxidase	Q9VIX4	Q9VIX4	Dorsal + Lateral (6)	2.02245	2.05155
		Q9VHN8	Q9VHN8	Dorsal + Lateral (6)	0.535334	0.47701
		Q9VHE3	Q9VHE3	Dorsal + Lateral (6)	0.669383	0.754793
CG9588	26S proteasome non-ATPase regulatory subunit 9	Q9VFS8	Q9VFS8	Dorsal + Lateral (6)	-0.229997	-0.223311
		Q9VDK9	Q9VDK9	Dorsal + Lateral (6)	-0.469658	-0.398088
	Aminoacylase-1	Q9VCR2;Q8T490	Q9VCR2	Dorsal + Lateral (6)	-0.121053	-0.109299
EloA	Transcription elongation factor B polypeptide 3	Q9VCP0	Q9VCP0	Dorsal + Lateral (6)	0.810383	0.77352
eIF4G2		Q9VCH1	Q9VCH1	Dorsal + Lateral (6)	0.623798	0.701071
ana1		Q9VC64	Q9VC64	Dorsal + Lateral (6)	0.688203	0.651926
		Q9VB96;A0A0B4K6I6	Q9VB96;A0A0B4K6I6	Dorsal + Lateral (6)	-0.429625	-0.390564
Klp98A	Kinesin-like protein	Q9VB25	Q9VB25	Dorsal + Lateral (6)	0.150505	0.0511188
alph		Q9VAK1	Q9VAK1	Dorsal + Lateral (6)	-0.283442	-0.285557
wts	Serine/threonine-protein kinase Warts	Q9VA38	Q9VA38	Dorsal + Lateral (6)	-0.131665	-0.124076
EndoGI		Q9V3V9	Q9V3V9	Dorsal + Lateral (6)	-0.242534	-0.1953
rdgBbeta	Cytoplasmic phosphatidylinositol transfer protein 1	Q9U9P7	Q9U9P7	Dorsal + Lateral (6)	-0.505929	-0.433124
chb	CLIP-associating protein	Q9NBD7	Q9NBD7	Dorsal + Lateral (6)	0.618821	0.650491
		Q95SI7	Q95SI7	Dorsal + Lateral (6)	-0.299961	-0.281775
Pi3K68D		Q95RR5	Q95RR5	Dorsal + Lateral (6)	0.53635	0.526969
Atu	Another transcription unit protein	Q94546	Q94546	Dorsal + Lateral (6)	-0.503723	-0.430843
Sym	Symplekin	Q8MSU4	Q8MSU4	Dorsal + Lateral (6)	0.471591	0.488537
		Q8MS69	Q8MS69	Dorsal + Lateral (6)	-0.269776	-0.365971
l(2)05714		Q9VMX2;Q8IPL4	Q9VMX2;Q8IPL4	Dorsal + Lateral (6)	0.0329563	0.0277341
Rtnl1	Reticulon-like protein	Q7KTP4;E1JHT9;Q9VMW2;Q9VMW4	Q7KTP4;E1JHT9;Q9VMW2;Q9VMW4	Dorsal + Lateral (6)	-0.47886	-0.569913
Fer1HCH	Ferritin	Q7KRU8;Q8I0T0	Q7KRU8;Q8I0T0	Dorsal + Lateral (6)	-0.433378	-0.388504
Cct5		Q7KKI0;A1Z8U4	Q7KKI0;A1Z8U4	Dorsal + Lateral (6)	-0.374281	-0.36279
		Q7KGU6;Q95R82	Q7KGU6;Q95R82	Dorsal + Lateral (6)	-0.130045	-0.0928156
Atf6		Q7K2V1;Q8SX87	Q7K2V1;Q8SX87	Dorsal + Lateral (6)	-0.288478	-0.302065
		Q4QQB9	Q4QQB9	Dorsal + Lateral (6)	1.32581	NaN
Lac	Lachesin	Q24372	Q24372	Dorsal + Lateral (6)	-0.273503	-0.361021
CG42259-RA		Q0KHX4	Q0KHX4	Dorsal + Lateral (6)	0.917816	0.95731
RpS20	40S ribosomal protein S20	P55828	P55828	Dorsal + Lateral (6)	-0.459977	-0.43401
bys	Bystin	P51406	P51406	Dorsal + Lateral (6)	0.590855	0.659477
pelo	Protein pelota	P48612	P48612	Dorsal + Lateral (6)	0.908649	0.88827
tsr	Cofilin/actin-depolymerizing factor homolog	P45594	P45594	Dorsal + Lateral (6)	-0.40245	-0.356577
Cyp1	Peptidyl-prolyl cis-trans isomerase	P25007;Q7K2I4	P25007	Dorsal + Lateral (6)	-0.560081	-0.544182
Vha16-1	V-type proton ATPase 16 kDa proteolipid subunit	P23380;Q8IQG3	P23380	Dorsal + Lateral (6)	0.048733	0.0894773
mt:ND3	NADH-ubiquinone oxidoreductase chain 3	P18930	P18930	Dorsal + Lateral (6)	-0.342321	-0.520692
Act5C	Actin-5C	X2JCP8;P10987	X2JCP8;P10987	Dorsal + Lateral (6)	-0.408677	-0.443694
Yp1	Vitellogenin-1	X2JD55;P02843	X2JD55;P02843	Dorsal + Lateral (6)	-0.331087	-0.344941
Adh	Alcohol dehydrogenase	P00334	P00334	Dorsal + Lateral (6)	-0.493754	-0.483441
hth	Homeobox protein homothorax	O46339	O46339	Dorsal + Lateral (6)	0.0174285	-0.0458015
fend	Transmembrane protein fend	M9PH27;Q9GNL3	M9PH27;Q9GNL3	Dorsal + Lateral (6)	-0.401158	-0.43232
oc	Homeotic protein ocelliless	M9PGZ9;M9PGN9;P22810	M9PGZ9;M9PGN9;P22810	Dorsal + Lateral (6)	1.43341	1.38664
		M9PGG8;Q8T415	M9PGG8	Dorsal + Lateral (6)	-0.315012	-0.334417
vari		M9PDB2;Q7KT16;Q2PDR9;Q9VIJ4	M9PDB2;Q7KT16;Q2PDR9;Q9VIJ4	Dorsal + Lateral (6)	-0.493796	-0.499459
RpLP1	60S acidic ribosomal protein P1	M9PBK5;P08570	M9PBK5;P08570	Dorsal + Lateral (6)	-0.547498	-0.569777
RpL27A	60S ribosomal protein L27a	M9MRC9;P41092	M9MRC9;P41092	Dorsal + Lateral (6)	-0.313362	-0.343826
CG5902	Uncharacterized protein CG5902	E1JIV0;Q9VCF0	E1JIV0;Q9VCF0	Dorsal + Lateral (6)	-0.506529	-0.456104
uif		Q9VM55;E1JHA6	Q9VM55;E1JHA6	Dorsal + Lateral (6)	0.0916321	0.0527516
PebIII-RA;PebIII	Ejaculatory bulb-specific protein 3	D5A7M1;Q9W1C9	D5A7M1;Q9W1C9	Dorsal + Lateral (6)	0.108796	0.0931255
ATPsyn-Cf6-RA;ATPsyn-Cf6	ATP synthase-coupling factor 6, mitochondrial	D1Z3A2;Q24407	D1Z3A2;Q24407	Dorsal + Lateral (6)	-0.302212	-0.263055
Moe		M9PHG2;C7LAH9	M9PHG2;C7LAH9	Dorsal + Lateral (6)	0.531226	0.50501
Hsc70-4-RA;Hsc70-4	Heat shock 70 kDa protein cognate 4	C7LA75;P11147	C7LA75;P11147	Dorsal + Lateral (6)	-0.359354	-0.364303
shot		A1Z9J3	A1Z9J3	Dorsal + Lateral (6)	0.68983	0.642515
GstE8		A1ZB73	A1ZB73	Dorsal + Lateral (6)	2.34931	2.35561
mRpS28		A1ZBA5	A1ZBA5	Dorsal + Lateral (6)	-0.410472	-0.440381
CG34310-RA		A8DYW4;A0A0S0WGS4	A8DYW4;A0A0S0WGS4	Dorsal + Lateral (6)	NaN	-0.102091
Spase25	Signal peptidase complex subunit 2	B4F5U4;Q9VYY2	B4F5U4;Q9VYY2	Dorsal + Lateral (6)	-0.400573	-0.409524
CG9865-RA		B7YZN6	B7YZN6	Dorsal + Lateral (6)	NaN	-0.243872
		M9PG55;Q9VJ42;B7YZX6	M9PG55;Q9VJ42;B7YZX6	Dorsal + Lateral (6)	-0.259105	-0.138195
Snup		B7Z0I7	B7Z0I7	Dorsal + Lateral (6)	-0.351837	-0.286713
		B9A0N7	B9A0N7	Dorsal + Lateral (6)	NaN	-0.34129
Tctp	Translationally-controlled tumor protein homolog	A0A126GUT1;Q9VGS2	A0A126GUT1;Q9VGS2	Dorsal + Lateral (6)	-0.337192	-0.287551
GstE6		A1ZB71	A1ZB71	Dorsal + Lateral (6)	-0.0898023	-0.111248
		A1Z9I0	A1Z9I0	Dorsal + Lateral (6)	0.83515	0.907573
ema		A0A0B4KH88;Q9VEV4;Q5BIH5	A0A0B4KH88;Q9VEV4;Q5BIH5	Dorsal + Lateral (6)	NaN	-0.480891
Nlp	Nucleoplasmin-like protein	A0A0B4KI24;Q27415	A0A0B4KI24;Q27415	Dorsal + Lateral (6)	-0.287975	-0.241743
awd	Nucleoside diphosphate kinase	A0A0B4LJ12;A0A0B4LHX6;P08879	A0A0B4LJ12;A0A0B4LHX6;P08879	Dorsal + Lateral (6)	-0.365353	-0.368605
Ef1alpha48D-RA;Ef1alpha48D	Elongation factor 1-alpha;Elongation factor 1-alpha 1	C6TP87;P08736	C6TP87;P08736	Dorsal + Lateral (6)	-0.327483	-0.306757
grh	Protein grainyhead	A0A0B4LFT7;P13002;A0A0B4K7F6	A0A0B4LFT7;P13002	Dorsal + Lateral (6)	NaN	-0.143814
CG11539	N-acetyltransferase 9-like protein	A0A0B4KHX9;Q9V9V9	A0A0B4KHX9;Q9V9V9	Dorsal + Lateral (6)	NaN	-0.359416
Alh		Q9VI61;A0A0B4KF76;Q8INT1;A0A0B4KFQ4;E1JJ75;E1JJ76;A8JQU7;Q7KSZ0;A0A0B4KFD2;Q9VI63;A0A0B4KGB4;A8JQU6;A0A0B4KGP1	Q9VI61;A0A0B4KF76;Q8INT1;A0A0B4KFQ4;E1JJ75;E1JJ76;A8JQU7;Q7KSZ0;A0A0B4KFD2;Q9VI63;A0A0B4KGB4;A8JQU6;A0A0B4KGP1	Dorsal + Lateral (6)	0.631602	0.695677
Fmr1	Fragile X mental retardation syndrome-related protein 1	Q9NFU0;B3LF78	Q9NFU0;B3LF78	Dorsal + Lateral (6)	0.232845	0.198354
		Q9I7M5	Q9I7M5	Dorsal + Lateral (6)	NaN	0.189039
tsg	Protein twisted gastrulation	P54356	P54356	Dorsal + Lateral (6)	0.718411	0.777111
w	Protein white	P10090	P10090	Dorsal + Lateral (6)	0.21845	NaN
		M9PJ04;Q2PE29;M9PGL8;Q7KVX6	M9PJ04;Q2PE29;M9PGL8;Q7KVX6	Dorsal + Lateral (6)	0.101132	0.0593962
sdt		Q9W3H6;Q7KVT3;X2JCZ1;M9PJD0;E2QD98;Q6NR03;Q0KHU9;X2JIZ6;Q9W3H8;Q9W3H7;M9NG38;M9NEZ2	Q9W3H6;Q7KVT3;X2JCZ1;M9PJD0;E2QD98;Q6NR03;Q0KHU9;X2JIZ6;Q9W3H8;Q9W3H7;M9NG38;M9NEZ2	Dorsal + Lateral (6)	0.23423	0.123604
heix	UbiA prenyltransferase domain-containing protein 1 homolog	Q9V3R8	Q9V3R8	Dorsal + Lateral (6)	0.214197	0.202021
		Q9VVS3	Q9VVS3	Dorsal + Lateral (6)	0.21967	0.239697
Duox	Dual oxidase	M9PCF1;Q9VQH2	M9PCF1;Q9VQH2	Dorsal + Ventral Tl10B (7)	0.0932223	NaN
egr		Q8MUJ1	Q8MUJ1	Dorsal + Ventral Tl10B (7)	1.90229	NaN
MED31	Mediator of RNA polymerase II transcription subunit 31	A0A0B4K6R3;Q8IH24	A0A0B4K6R3;Q8IH24	Dorsal + Ventral Tl10B (7)	0.602619	NaN
rdgB	Protein retinal degeneration B	E1JJK9;E1JJK7;X2JF93;P43125;E1JJK8;E1JJK6;M9PJM8;M9PEJ5	E1JJK9;E1JJK7;X2JF93;P43125;E1JJK8;E1JJK6;M9PJM8;M9PEJ5	Dorsal + Ventral Tl10B (7)	0.277382	NaN
		Q7JY99	Q7JY99	Dorsal + Ventral Tl10B (7)	0.488665	NaN
		Q7JZY1	Q7JZY1	Dorsal + Ventral Tl10B (7)	0.160233	NaN
NimB2		Q7KTA1	Q7KTA1	Dorsal + Ventral Tl10B (7)	0.214493	NaN
CG8372-RB		Q9VLR4;Q8IPG2	Q9VLR4;Q8IPG2	Dorsal + Ventral Tl10B (7)	0.280954	NaN
net		Q9VPI8	Q9VPI8	Dorsal + Ventral Tl10B (7)	0.290462	NaN
		Q9VQ75	Q9VQ75	Dorsal + Ventral Tl10B (7)	0.296592	NaN
p24-1		Q9VYT6	Q9VYT6	Dorsal + Ventral Tl10B (7)	0.293039	NaN
AttB;AttA	Attacin-B;Attacin-A	E1JH67;Q9V751;P45884	E1JH67;Q9V751;P45884	Dorsal + Ventral Tl10B (7)	0.294414	NaN
CG12717-RA		Q9VYJ5	Q9VYJ5	Dorsal + Ventral Tl10B (7)	0.591032	NaN
		Q9VST8	Q9VST8	Dorsal + Ventral Tl10B (7)	-0.221801	NaN
		Q7JXE1	Q7JXE1	Dorsal + Ventral Tl10B (7)	0.335763	NaN
EG:115C2.8		Q9W5E2	Q9W5E2	Dorsal + Ventral Tl10B (7)	0.27611	NaN
VhaAC39-1	V-type proton ATPase subunit d 1	Q9W4P5	Q9W4P5	Dorsal + Ventral Tl10B (7)	0.904866	NaN
CG15896-RA		Q9W413	Q9W413	Dorsal + Ventral Tl10B (7)	0.636091	NaN
		Q9W3V3	Q9W3V3	Dorsal + Ventral Tl10B (7)	-0.333899	NaN
Dok		Q9W3R6	Q9W3R6	Dorsal + Ventral Tl10B (7)	0.752928	NaN
Ser7		Q9W314	Q9W314	Dorsal + Ventral Tl10B (7)	-0.427559	NaN
Vha100-1	V-type proton ATPase subunit a	Q9XZ10;Q8IML5	Q9XZ10;Q8IML5	Dorsal + Ventral Tl10B (7)	-0.202786	NaN
Rrp4		Q9W1M9	Q9W1M9	Dorsal + Ventral Tl10B (7)	-0.285678	NaN
		Q9W1F5	Q9W1F5	Dorsal + Ventral Tl10B (7)	0.367024	NaN
Ptp61F	Tyrosine-protein phosphatase non-receptor type 61F;Protein-tyrosine-phosphatase	Q9W0G1;Q8IRH4	Q9W0G1;Q8IRH4	Dorsal + Ventral Tl10B (7)	0.479355	NaN
		Q9W0B2;A0A0S0WGR0	Q9W0B2;A0A0S0WGR0	Dorsal + Ventral Tl10B (7)	-0.378176	NaN
CG9977-RA	Adenosylhomocysteinase	Q9VZX9;Q7KSG0;P50245	Q9VZX9	Dorsal + Ventral Tl10B (7)	-0.457372	NaN
feo		Q9VZ62	Q9VZ62	Dorsal + Ventral Tl10B (7)	0.525681	NaN
		Q9VYT1	Q9VYT1	Dorsal + Ventral Tl10B (7)	-0.446623	NaN
Tomosyn		Q9VYK6;A4V4D2;Q9VYK5	Q9VYK6;A4V4D2;Q9VYK5	Dorsal + Ventral Tl10B (7)	0.568325	NaN
CG3775-RA		Q9VYJ1	Q9VYJ1	Dorsal + Ventral Tl10B (7)	0.7942	NaN
ND-B18		Q9VXZ0	Q9VXZ0	Dorsal + Ventral Tl10B (7)	-0.418639	NaN
		Q9VXH4	Q9VXH4	Dorsal + Ventral Tl10B (7)	0.707338	NaN
mRpS14		Q9VWI3	Q9VWI3	Dorsal + Ventral Tl10B (7)	0.643835	NaN
Syx8		Q9VV76	Q9VV76	Dorsal + Ventral Tl10B (7)	0.540843	NaN
CG15715-RA		Q9VUU8;Q9VUU7	Q9VUU8;Q9VUU7	Dorsal + Ventral Tl10B (7)	0.762557	NaN
UFSP2	Probable Ufm1-specific protease 2	Q9VUR0	Q9VUR0	Dorsal + Ventral Tl10B (7)	0.441143	NaN
CG32104-RB		Q9VTX1	Q9VTX1	Dorsal + Ventral Tl10B (7)	0.396101	NaN
		Q9VT29	Q9VT29	Dorsal + Ventral Tl10B (7)	-0.184786	NaN
exo70	Exocyst complex component 7	Q9VSJ8	Q9VSJ8	Dorsal + Ventral Tl10B (7)	0.545731	NaN
		Q9VS44	Q9VS44	Dorsal + Ventral Tl10B (7)	0.359598	NaN
membrin	Probable Golgi SNAP receptor complex member 2	Q9VRL2	Q9VRL2	Dorsal + Ventral Tl10B (7)	0.587455	NaN
		Q9VR05	Q9VR05	Dorsal + Ventral Tl10B (7)	-0.372456	NaN
PIF1	ATP-dependent DNA helicase PIF1	Q9VQR3;REV__A1Z7X7	Q9VQR3	Dorsal + Ventral Tl10B (7)	-0.454003	NaN
Rpp30		Q9VPM0	Q9VPM0	Dorsal + Ventral Tl10B (7)	0.502076	NaN
VhaM9.7-b		Q9VP18	Q9VP18	Dorsal + Ventral Tl10B (7)	-0.270307	NaN
CG12581-RA		Q9VMY3	Q9VMY3	Dorsal + Ventral Tl10B (7)	-0.345468	NaN
Ent2		Q9VMB6	Q9VMB6	Dorsal + Ventral Tl10B (7)	-0.200332	NaN
Tep2		Q9VLY9;Q8IPH5;Q8IPH4;Q9VLZ0	Q9VLY9;Q8IPH5;Q8IPH4;Q9VLZ0	Dorsal + Ventral Tl10B (7)	0.424503	NaN
CG42486-RA		Q9VKE7	Q9VKE7	Dorsal + Ventral Tl10B (7)	0.702344	NaN
loqs		X2J5X6;Q9VJY9;X2JAB1;Q8IP72	X2J5X6;Q9VJY9;X2JAB1;Q8IP72	Dorsal + Ventral Tl10B (7)	0.464413	NaN
DNApol-gamma35		Q9VJV8	Q9VJV8	Dorsal + Ventral Tl10B (7)	-0.159673	NaN
fon		Q9VIX7;Q8INW9	Q9VIX7;Q8INW9	Dorsal + Ventral Tl10B (7)	-0.333725	NaN
Rab9		Q9VIW6	Q9VIW6	Dorsal + Ventral Tl10B (7)	0.723651	NaN
CG9319-RA		Q9VIK0	Q9VIK0	Dorsal + Ventral Tl10B (7)	0.577809	NaN
		X2J9A5;Q9VII9	X2J9A5;Q9VII9	Dorsal + Ventral Tl10B (7)	-0.292302	NaN
SdhC		Q9VGS3	Q9VGS3	Dorsal + Ventral Tl10B (7)	-0.244515	NaN
		Q9VGF3	Q9VGF3	Dorsal + Ventral Tl10B (7)	-0.367818	NaN
CG11447	rRNA methyltransferase 2, mitochondrial	Q9VDT6	Q9VDT6	Dorsal + Ventral Tl10B (7)	0.654021	NaN
AP-2sigma		Q9VDC3	Q9VDC3	Dorsal + Ventral Tl10B (7)	0.382621	NaN
		Q9VC65	Q9VC65	Dorsal + Ventral Tl10B (7)	0.331161	NaN
CG5880-RA	Palmitoyltransferase	Q9VB73	Q9VB73	Dorsal + Ventral Tl10B (7)	0.715168	NaN
CG2006-RA		Q9VAL1	Q9VAL1	Dorsal + Ventral Tl10B (7)	-0.274379	NaN
Npc2h		Q9VA41;Q8IMH5	Q9VA41;Q8IMH5	Dorsal + Ventral Tl10B (7)	-0.432496	NaN
pcs	SH3 domain-binding protein 5 homolog	Q9V785	Q9V785	Dorsal + Ventral Tl10B (7)	0.476987	NaN
Rab5		Q9V3I2	Q9V3I2	Dorsal + Ventral Tl10B (7)	-0.387352	NaN
Tsp66E	Tetraspanin	Q9V3E5	Q9V3E5	Dorsal + Ventral Tl10B (7)	0.418584	NaN
mus205	DNA polymerase	Q9GSR1	Q9GSR1	Dorsal + Ventral Tl10B (7)	-0.393555	NaN
		Q960W0	Q960W0	Dorsal + Ventral Tl10B (7)	0.339021	NaN
alpha-Est5		Q95U30	Q95U30	Dorsal + Ventral Tl10B (7)	-0.431484	NaN
Atox1		Q95RR1;M9PD88	Q95RR1;M9PD88	Dorsal + Ventral Tl10B (7)	0.60631	NaN
		Q8SWS2;X2JEY3;Q9VYM7	Q8SWS2;X2JEY3;Q9VYM7	Dorsal + Ventral Tl10B (7)	-0.331543	NaN
pgant9	Putative polypeptide N-acetylgalactosaminyltransferase 9	Q8MRC9	Q8MRC9	Dorsal + Ventral Tl10B (7)	0.43471	NaN
Nrx-IV	Neurexin-4	Q8IQH0;Q94887	Q8IQH0;Q94887	Dorsal + Ventral Tl10B (7)	0.637198	NaN
Mocs1	'Molybdenum cofactor biosynthesis protein 1;Cyclic pyranopterin monophosphate synthase;Cyclic pyranopterin monophosphate synthase...' <Preview truncated at 128 characters>	Q8IQF1	Q8IQF1	Dorsal + Ventral Tl10B (7)	-0.36398	NaN
		Q8IQC6	Q8IQC6	Dorsal + Ventral Tl10B (7)	0.569355	NaN
BG:DS00797.2		Q8IP67;Q9V3D1;X2JAD3	Q8IP67;Q9V3D1;X2JAD3	Dorsal + Ventral Tl10B (7)	-0.39049	NaN
		Q8ING0	Q8ING0	Dorsal + Ventral Tl10B (7)	-0.508498	NaN
Tim22	Mitochondrial import inner membrane translocase subunit Tim22	Q8IN78	Q8IN78	Dorsal + Ventral Tl10B (7)	-0.237379	NaN
Vha100-1	V-type proton ATPase subunit a	Q8IML3;Q8IML4;Q6NLA3	Q8IML3;Q8IML4;Q6NLA3	Dorsal + Ventral Tl10B (7)	-0.304026	NaN
		Q86NX3	Q86NX3	Dorsal + Ventral Tl10B (7)	0.436657	NaN
p24-2;eca	Transmembrane emp24 domain-containing protein eca	Q86BA5;Q9I7K5	Q86BA5;Q9I7K5	Dorsal + Ventral Tl10B (7)	0.454249	NaN
p120ctn		Q7PLI0	Q7PLI0	Dorsal + Ventral Tl10B (7)	0.568136	NaN
CG17896	Probable methylmalonate-semialdehyde dehydrogenase [acylating], mitochondrial	Q7KW39	Q7KW39	Dorsal + Ventral Tl10B (7)	-0.450905	NaN
oxt	Xylosyltransferase oxt	Q7KVA1	Q7KVA1	Dorsal + Ventral Tl10B (7)	0.567463	NaN
tkv	Receptor protein serine/threonine kinase	Q95SI0;Q8IPK9;Q7KTP1;Q9VMT1	Q95SI0;Q8IPK9;Q7KTP1;Q9VMT1	Dorsal + Ventral Tl10B (7)	0.399015	NaN
		Q961V3;Q7KRU0;A0A0B4KHW7	Q961V3;Q7KRU0;A0A0B4KHW7	Dorsal + Ventral Tl10B (7)	-0.185483	NaN
fat-spondin		Q7KN04	Q7KN04	Dorsal + Ventral Tl10B (7)	-0.413452	NaN
Dip3		Q7JZD5	Q7JZD5	Dorsal + Ventral Tl10B (7)	0.617097	NaN
Snx16		Q7JR96	Q7JR96	Dorsal + Ventral Tl10B (7)	0.602761	NaN
VhaAC45		Q7JR49	Q7JR49	Dorsal + Ventral Tl10B (7)	-0.434872	NaN
Mer	Moesin/ezrin/radixin homolog 2	X2JFU0;Q24564	X2JFU0;Q24564	Dorsal + Ventral Tl10B (7)	0.515207	NaN
		Q0E8E7	Q0E8E7	Dorsal + Ventral Tl10B (7)	-0.487278	NaN
CG32158-RE		Q0E8E1;Q9I7R2	Q0E8E1;Q9I7R2	Dorsal + Ventral Tl10B (7)	1.19834	NaN
Taf5	Transcription initiation factor TFIID subunit 5	P49846	P49846	Dorsal + Ventral Tl10B (7)	0.374468	NaN
Fas2	Fasciclin-2	M9PGF6;X2JCI0;M9PJ19;X2JAF4;P34082	M9PGF6;X2JCI0;M9PJ19;X2JAF4;P34082	Dorsal + Ventral Tl10B (7)	-0.244363	NaN
CG6479-RA;CG6479-RB		M9PFY2;Q9VVF4;Q8IQQ8	M9PFY2;Q9VVF4;Q8IQQ8	Dorsal + Ventral Tl10B (7)	-0.287883	NaN
		M9PHQ1;M9PFD0;Q9VRG4	M9PHQ1;M9PFD0;Q9VRG4	Dorsal + Ventral Tl10B (7)	0.61318	NaN
RasGAP1	GTPase-activating protein	M9PF62;P48423	M9PF62;P48423	Dorsal + Ventral Tl10B (7)	0.46403	NaN
CG12084	Protein zer-1 homolog	M9PBH9;Q9W0E8	M9PBH9;Q9W0E8	Dorsal + Ventral Tl10B (7)	0.527882	NaN
Ndae1	Anion exchange protein	M9PB60;M9PCT2;Q9VM32;M9PF01;M9PCF0;M9PC92;Q9VM31;M9PC95;M9PB59;Q8IPI3	M9PB60;M9PCT2;Q9VM32;M9PF01;M9PCF0;M9PC92;Q9VM31;M9PC95;M9PB59;Q8IPI3	Dorsal + Ventral Tl10B (7)	0.447392	NaN
CycA	G2/mitotic-specific cyclin-A	M9NFR3;P14785	M9NFR3;P14785	Dorsal + Ventral Tl10B (7)	0.469993	NaN
amx	TM2 domain-containing protein almondex	M9NF00;Q9U4H5	M9NF00;Q9U4H5	Dorsal + Ventral Tl10B (7)	0.701405	NaN
CG9336-RA		M9NEV7;Q9VII1	M9NEV7;Q9VII1	Dorsal + Ventral Tl10B (7)	-0.2497	NaN
Chd1	Chromodomain-helicase-DNA-binding protein 1	M9ND16;Q7KU24;M9PEB2	M9ND16;Q7KU24;M9PEB2	Dorsal + Ventral Tl10B (7)	0.572017	NaN
CG9154-RA;CG9154	Protein-lysine N-methyltransferase CG9154	H0RNC9;Q9VMH7	H0RNC9;Q9VMH7	Dorsal + Ventral Tl10B (7)	-0.476842	NaN
CG7705-RA		E2QCZ3;E2QCZ4	E2QCZ3	Dorsal + Ventral Tl10B (7)	-0.297406	NaN
APC4		E1JJG4;Q9W395	E1JJG4;Q9W395	Dorsal + Ventral Tl10B (7)	0.264415	NaN
Den1		Q7JUX2;E1JH43	Q7JUX2;E1JH43	Dorsal + Ventral Tl10B (7)	-0.329353	NaN
mfas-RJ;mfas		D3DMM4;Q86B97;Q9VGE9;Q86B96;Q86B95;Q9VGF0;Q86B94	D3DMM4;Q86B97;Q9VGE9;Q86B96;Q86B95;Q9VGF0;Q86B94	Dorsal + Ventral Tl10B (7)	0.766447	NaN
		L0MLL1;Q8IMA6;Q7KQN3;A8DZ26;Q8IMA3;Q8IMA5;Q8IMA7;Q8SXV3	L0MLL1;Q8IMA6;Q7KQN3;A8DZ26	Dorsal + Ventral Tl10B (7)	-0.403618	NaN
Aef1	Adult enhancer factor 1	A4V287;M9PG42;P39413	A4V287;M9PG42;P39413	Dorsal + Ventral Tl10B (7)	-0.453035	NaN
CycE	G1/S-specific cyclin-E	A4V0R4;M9NDQ2;P54733	A4V0R4;M9NDQ2;P54733	Dorsal + Ventral Tl10B (7)	0.441005	NaN
CG33506-RA		A1Z9W2	A1Z9W2	Dorsal + Ventral Tl10B (7)	0.207422	NaN
		A1Z830;A1Z831	A1Z830;A1Z831	Dorsal + Ventral Tl10B (7)	-0.409186	NaN
		Q9VEZ6;A0A126GUV0	Q9VEZ6;A0A126GUV0	Dorsal + Ventral Tl10B (7)	0.745799	NaN
l(2)k09913		A0A0B4LG95;Q7K274;A0A0B4LGC6;Q8MLS7	A0A0B4LG95;Q7K274;A0A0B4LGC6;Q8MLS7	Dorsal + Ventral Tl10B (7)	-0.296491	NaN
CG11755	Cysteine-rich DPF motif domain-containing protein 1	A0A0B4KFI0;Q9VHN3	A0A0B4KFI0;Q9VHN3	Dorsal + Ventral Tl10B (7)	0.589061	NaN
Topors	E3 ubiquitin-protein ligase Topors	A0A0B4KEZ9;Q9V8P9	A0A0B4KEZ9;Q9V8P9	Dorsal + Ventral Tl10B (7)	0.591736	NaN
Glycogenin		A0A0B4K7X5;A0A0B4LFW5;Q9W2J6;A0A0B4LG72;A0A0B4LG29;E1JGQ3	A0A0B4K7X5;A0A0B4LFW5;Q9W2J6;A0A0B4LG72;A0A0B4LG29;E1JGQ3	Dorsal + Ventral Tl10B (7)	0.683177	NaN
CG6136	Copper homeostasis protein cutC homolog	A0A0B4JDE8;Q9VF71	A0A0B4JDE8;Q9VF71	Dorsal + Ventral Tl10B (7)	0.687007	NaN
Nc73EF		A8JNU6	A8JNU6	Dorsal + Ventral Tl10B (7)	-0.351163	NaN
Lap1	Protein lap1	A0A0B4JCT8;Q9V780	A0A0B4JCT8;Q9V780	Dorsal + Ventral Tl10B (7)	0.402279	NaN
		Q8IQZ4	Q8IQZ4	Dorsal + Ventral Tl10B (7)	0.414465	NaN
		Q9VW68	Q9VW68	Dorsal + Ventral spn27A (8)	NaN	0.251425
		Q9VI65	Q9VI65	Dorsal + Ventral spn27A (8)	NaN	0.212784
bol	Protein boule	A4V1Q1;A4V1Q0;M9PF25;Q24207;Q6NN06	A4V1Q1;A4V1Q0;M9PF25;Q24207;Q6NN06	Dorsal + Ventral spn27A (8)	NaN	0.16721
		B7YZJ4	B7YZJ4	Dorsal + Ventral spn27A (8)	NaN	-0.0274555
Jheh1		Q7JRC3	Q7JRC3	Dorsal + Ventral spn27A (8)	NaN	-0.180062
l(1)G0045		Q7KVW2	Q7KVW2	Dorsal + Ventral spn27A (8)	NaN	0.0357899
CG11077	Mpv17-like protein	Q9V492	Q9V492	Dorsal + Ventral spn27A (8)	NaN	0.871736
CG16790	U6 snRNA phosphodiesterase	Q9VHB3	Q9VHB3	Dorsal + Ventral spn27A (8)	NaN	-0.00893707
l(2)k14710		A0A0B4K7H0;Q7KN74	A0A0B4K7H0;Q7KN74	Dorsal + Ventral spn27A (8)	NaN	0.581805
		A0A0B4KEN1;A1Z7N4;A0A0B4KEF7;A0A0B4LEX2	A0A0B4KEN1;A1Z7N4;A0A0B4KEF7;A0A0B4LEX2	Dorsal + Ventral spn27A (8)	NaN	-0.0766404
Ppa;ppa		Q9W214;A0A0B4KF28	Q9W214;A0A0B4KF28	Dorsal + Ventral spn27A (8)	NaN	0.861062
f-cup		Q7KSK8;Q9V3X1;A0A0B4KFW1;A0A0B4KG03;A8JQZ7;A0A0B4KGK9;A8JQZ8;Q6NLJ7	Q7KSK8;Q9V3X1;A0A0B4KFW1;A0A0B4KG03;A8JQZ7;A0A0B4KGK9	Dorsal + Ventral spn27A (8)	NaN	0.535585
CG1969-RB;CG1969	Probable glucosamine 6-phosphate N-acetyltransferase	Q8IMK5;C6TP98;A0A0B4KI57;A0A0B4K7R2;Q9VAI0	Q8IMK5;C6TP98;A0A0B4KI57;A0A0B4K7R2;Q9VAI0	Dorsal + Ventral spn27A (8)	NaN	-0.295404
Zasp52	PDZ and LIM domain protein Zasp	A0A0B4LGL0;A1ZA47;A0A126GUN6;A0A0B4KEW3;C1C3E7;G3JX29;G3JX30;G3JX27;G3JX28;A0A0B4KFR8;A0A0B4KER6;G3JX25;G3JX31;G3JX32;G3JX33	A0A0B4LGL0;A1ZA47;A0A126GUN6;A0A0B4KEW3;C1C3E7;G3JX29;G3JX30;G3JX27;G3JX28;A0A0B4KFR8;A0A0B4KER6;G3JX25;G3JX31;G3JX32	Dorsal + Ventral spn27A (8)	NaN	0.998071
Not10	CCR4-NOT transcription complex subunit 10	A0A126GUU0;Q9V3G6	A0A126GUU0;Q9V3G6	Dorsal + Ventral spn27A (8)	NaN	-0.326212
CG7220-RB		Q8T972;A1Z8B5	Q8T972;A1Z8B5	Dorsal + Ventral spn27A (8)	NaN	0.658526
Pms2		A1ZA03	A1ZA03	Dorsal + Ventral spn27A (8)	NaN	-0.291117
CG9646-RA		A1ZAP1;A0A0B4LFQ7	A1ZAP1;A0A0B4LFQ7	Dorsal + Ventral spn27A (8)	NaN	-0.239022
CG12263-RA		A1ZB84;REV__A1ZB84	A1ZB84	Dorsal + Ventral spn27A (8)	NaN	0.677918
CG4495	Calcium uptake protein 1 homolog, mitochondrial	A2VEI2	A2VEI2	Dorsal + Ventral spn27A (8)	NaN	-0.126466
GstS1	Glutathione S-transferase S1	A4UZL5;P41043	A4UZL5;P41043	Dorsal + Ventral spn27A (8)	NaN	0.0278499
Idh	Isocitrate dehydrogenase [NADP]	B7Z0E0;Q8IQA7;Q9VSI6;Q7KUB0	B7Z0E0;Q8IQA7;Q9VSI6;Q7KUB0	Dorsal + Ventral spn27A (8)	NaN	0.527555
RpS9	40S ribosomal protein S9	C6SUW3;P55935;Q95RG1	C6SUW3;P55935;Q95RG1	Dorsal + Ventral spn27A (8)	NaN	-0.448378
ssh	Protein phosphatase Slingshot	D3PFH9;E1JIW2;Q6NN85	D3PFH9;E1JIW2;Q6NN85	Dorsal + Ventral spn27A (8)	NaN	0.623842
CG40228	Transcription elongation factor 1 homolog	L7ED64;L7EEF9;Q8MQI6	L7ED64;L7EEF9;Q8MQI6	Dorsal + Ventral spn27A (8)	NaN	-0.115854
RluA-2		M9MRH0;Q9VKU8;M9PFI9;Q9VKV0	M9MRH0;Q9VKU8	Dorsal + Ventral spn27A (8)	NaN	-0.351811
qua	Villin-like protein quail	M9NF69;Q23989	M9NF69;Q23989	Dorsal + Ventral spn27A (8)	NaN	-0.23282
pgant6	Polypeptide N-acetylgalactosaminyltransferase;N-acetylgalactosaminyltransferase 6	M9PBK1;Q6WV16	M9PBK1;Q6WV16	Dorsal + Ventral spn27A (8)	NaN	0.516176
CG3887	SelT-like protein	M9PCL4;Q9VMV6	M9PCL4;Q9VMV6	Dorsal + Ventral spn27A (8)	NaN	0.904857
Ac78C		M9PG27;M9PD54;Q9VP76;M9PID8;M9NG95	M9PG27;M9PD54;Q9VP76;M9PID8;M9NG95	Dorsal + Ventral spn27A (8)	NaN	0.655927
cad	Homeotic protein caudal	M9PDI3;P09085	M9PDI3;P09085	Dorsal + Ventral spn27A (8)	NaN	-0.683863
cta	Guanine nucleotide-binding protein subunit alpha homolog	M9PDM5;P25157	M9PDM5;P25157	Dorsal + Ventral spn27A (8)	NaN	-0.263996
Atg18a		M9PEY7;M9PER1;M9PHS3;Q9VSF0	M9PEY7;M9PER1;M9PHS3;Q9VSF0	Dorsal + Ventral spn27A (8)	NaN	-0.528489
wek	Zinc finger protein weckle	M9PFY1;Q9VJN5	M9PFY1;Q9VJN5	Dorsal + Ventral spn27A (8)	NaN	-0.0298043
Rab10		O15971	O15971	Dorsal + Ventral spn27A (8)	NaN	-0.471509
Rab1		O18332	O18332	Dorsal + Ventral spn27A (8)	NaN	-0.25541
kz	Probable ATP-dependent RNA helicase kurz	X2JCE0;O46072	X2JCE0;O46072	Dorsal + Ventral spn27A (8)	NaN	-0.0625704
Flo-1	Flotillin-1	O61491	O61491	Dorsal + Ventral spn27A (8)	NaN	-0.214176
crm	Protein cramped	O76906	O76906	Dorsal + Ventral spn27A (8)	NaN	0.380798
Ras85D	Ras-like protein 1	P08646	P08646	Dorsal + Ventral spn27A (8)	NaN	-0.22283
Pka-C3	Protein kinase DC2	P16912	P16912	Dorsal + Ventral spn27A (8)	NaN	-0.231785
RpL18A	60S ribosomal protein L18a	P41093	P41093	Dorsal + Ventral spn27A (8)	NaN	-0.425268
smo	Protein smoothened	P91682	P91682	Dorsal + Ventral spn27A (8)	NaN	0.490002
dx	Protein deltex	Q23985	Q23985	Dorsal + Ventral spn27A (8)	NaN	-0.262364
		Q32KD3;Q7KSW1;Q494I1;A0A0B4KGS8;Q9VHW9;A0A0B4KGF6	Q32KD3;Q7KSW1;Q494I1;A0A0B4KGS8;Q9VHW9;A0A0B4KGF6	Dorsal + Ventral spn27A (8)	NaN	-0.121733
		Q6NLJ9	Q6NLJ9	Dorsal + Ventral spn27A (8)	NaN	0.0284292
		Q6NR22	Q6NR22	Dorsal + Ventral spn27A (8)	NaN	0.579251
CG1598	ATPase ASNA1 homolog	Q7JWD3	Q7JWD3	Dorsal + Ventral spn27A (8)	NaN	0.575796
		Q7JWU9	Q7JWU9	Dorsal + Ventral spn27A (8)	NaN	-0.231875
OstDelta		Q7K110	Q7K110	Dorsal + Ventral spn27A (8)	NaN	-0.196492
		Q7K1M4	Q7K1M4	Dorsal + Ventral spn27A (8)	NaN	0.657503
mlt		Q7K549	Q7K549	Dorsal + Ventral spn27A (8)	NaN	-0.579149
Bmcp		Q7K566	Q7K566	Dorsal + Ventral spn27A (8)	NaN	-0.134816
Dark		Q7KLI1;Q9U8R4	Q7KLI1;Q9U8R4	Dorsal + Ventral spn27A (8)	NaN	-0.551903
LpR2		Q7YU01;A8JRC4;A8JRC7;A0A0B4KH38;Q9VBN2;Q7YTZ6;Q86B77;A0A0B4KGZ9;Q6NN57	Q7YU01;A8JRC4;A8JRC7;A0A0B4KH38;Q9VBN2;Q7YTZ6;Q86B77;A0A0B4KGZ9	Dorsal + Ventral spn27A (8)	NaN	0.942497
		Q9VYT2;Q8IR85	Q9VYT2;Q8IR85	Dorsal + Ventral spn27A (8)	NaN	0.469004
Strip		Q9VZQ9;Q8IRD5	Q9VZQ9;Q8IRD5	Dorsal + Ventral spn27A (8)	NaN	-0.48676
		Q8MLW4	Q8MLW4	Dorsal + Ventral spn27A (8)	NaN	-0.623053
CG8135	LMBR1 domain-containing protein 2 homolog	Q8MRQ4	Q8MRQ4	Dorsal + Ventral spn27A (8)	NaN	-0.609312
PIP4K		Q8SXX1	Q8SXX1	Dorsal + Ventral spn27A (8)	NaN	-0.302236
		Q8SZB7	Q8SZB7	Dorsal + Ventral spn27A (8)	NaN	-0.142576
Mms19		Q95U54	Q95U54	Dorsal + Ventral spn27A (8)	NaN	0.393863
Idgf2	Chitinase-like protein Idgf2	Q9V3D4;D4G7B1	Q9V3D4;D4G7B1	Dorsal + Ventral spn27A (8)	NaN	-0.430233
htt		Q9V3N4	Q9V3N4	Dorsal + Ventral spn27A (8)	NaN	0.63081
EG:103E12.3		Q9V3U1;M9PGK1	Q9V3U1;M9PGK1	Dorsal + Ventral spn27A (8)	NaN	-0.290447
tsu	RNA-binding protein 8A	Q9V535	Q9V535	Dorsal + Ventral spn27A (8)	NaN	-0.416097
Bet5		Q9VA95	Q9VA95	Dorsal + Ventral spn27A (8)	NaN	-0.172262
CG1458	CDGSH iron-sulfur domain-containing protein 2 homolog	Q9VAM6	Q9VAM6	Dorsal + Ventral spn27A (8)	NaN	0.575483
l(3)mbt		Q9VB52	Q9VB52	Dorsal + Ventral spn27A (8)	NaN	0.575068
Nup37		Q9VBU8	Q9VBU8	Dorsal + Ventral spn27A (8)	NaN	-0.204441
AP-1sigma		Q9VCF4	Q9VCF4	Dorsal + Ventral spn27A (8)	NaN	-0.478959
CG3337-RA		Q9VDC8	Q9VDC8	Dorsal + Ventral spn27A (8)	NaN	-0.0153989
Der-2		Q9VEU2	Q9VEU2	Dorsal + Ventral spn27A (8)	NaN	-0.18851
Rbf2		Q9VF04	Q9VF04	Dorsal + Ventral spn27A (8)	NaN	-0.468099
l(3)neo43		Q9VF98	Q9VF98	Dorsal + Ventral spn27A (8)	NaN	1.00285
yellow-f2		Q9VG08	Q9VG08	Dorsal + Ventral spn27A (8)	NaN	0.456207
	D-tyrosyl-tRNA(Tyr) deacylase	Q9VGP0	Q9VGP0	Dorsal + Ventral spn27A (8)	NaN	0.565181
		Q9VGR0	Q9VGR0	Dorsal + Ventral spn27A (8)	NaN	0.635694
		Q9VHB1;A0A0B4KFZ7;Q9VHB2	Q9VHB1;A0A0B4KFZ7	Dorsal + Ventral spn27A (8)	NaN	-0.378369
CG8202	UPF0505 protein CG8202	Q9VHM2	Q9VHM2	Dorsal + Ventral spn27A (8)	NaN	0.505218
l(2)k14505		Q9VID7	Q9VID7	Dorsal + Ventral spn27A (8)	NaN	-0.346427
Mtp		Q9VIH3	Q9VIH3	Dorsal + Ventral spn27A (8)	NaN	0.414015
Nak		Q9VJ30;Q7KT38;X2J946	Q9VJ30;Q7KT38;X2J946	Dorsal + Ventral spn27A (8)	NaN	-0.30677
		Q9VKQ7	Q9VKQ7	Dorsal + Ventral spn27A (8)	NaN	0.773025
CG4592-RA		Q9VL66	Q9VL66	Dorsal + Ventral spn27A (8)	NaN	0.83076
RpL36A		Q9VLT7	Q9VLT7	Dorsal + Ventral spn27A (8)	NaN	0.0495917
Arpc4		Q9VMH2	Q9VMH2	Dorsal + Ventral spn27A (8)	NaN	0.660627
Scox		Q9VMX4	Q9VMX4	Dorsal + Ventral spn27A (8)	NaN	-0.392737
RpL13A	60S ribosomal protein L13a	Q9VNE9;A0A0B4KFM7	Q9VNE9	Dorsal + Ventral spn27A (8)	NaN	-0.574361
		Q9VNR7;A8E6R2	Q9VNR7;A8E6R2	Dorsal + Ventral spn27A (8)	NaN	-0.742491
		Q9VPA9	Q9VPA9	Dorsal + Ventral spn27A (8)	NaN	0.594191
		Q9VQ27	Q9VQ27	Dorsal + Ventral spn27A (8)	NaN	0.479618
		Q9VQ60	Q9VQ60	Dorsal + Ventral spn27A (8)	NaN	0.319806
Txl		Q9VRP3	Q9VRP3	Dorsal + Ventral spn27A (8)	NaN	-0.499782
CG7457-RA;CG7457	Tonsoku-like protein	T2GGE0;Q9VSA4	T2GGE0;Q9VSA4	Dorsal + Ventral spn27A (8)	NaN	0.158501
GstO3		Q9VSL2	Q9VSL2	Dorsal + Ventral spn27A (8)	NaN	-0.00414947
Cdk8	Cyclin-dependent kinase 8	Q9VT57	Q9VT57	Dorsal + Ventral spn27A (8)	NaN	0.381708
		Q9VTV4	Q9VTV4	Dorsal + Ventral spn27A (8)	NaN	-0.282653
SRm160		Q9VU43	Q9VU43	Dorsal + Ventral spn27A (8)	NaN	-0.2251
ptip		Q9VUB7	Q9VUB7	Dorsal + Ventral spn27A (8)	NaN	-0.213829
		Q9VV49	Q9VV49	Dorsal + Ventral spn27A (8)	NaN	0.693629
CG9231	UPF0389 protein CG9231	X2JGV8;Q9VW12	X2JGV8;Q9VW12	Dorsal + Ventral spn27A (8)	NaN	0.659502
CG6659	C-mannosyltransferase dpy-19 homolog	Q9VWR8	Q9VWR8	Dorsal + Ventral spn27A (8)	NaN	-0.523519
mei-41	Serine/threonine-protein kinase ATR	Q9VXG8	Q9VXG8	Dorsal + Ventral spn27A (8)	NaN	-0.179737
Aven		Q9VYK8	Q9VYK8	Dorsal + Ventral spn27A (8)	NaN	0.407264
CG16986-RA		Q9VZZ5	Q9VZZ5	Dorsal + Ventral spn27A (8)	NaN	-0.0956979
or		Q9W1E8	Q9W1E8	Dorsal + Ventral spn27A (8)	NaN	0.384267
		Q9W2P5	Q9W2P5	Dorsal + Ventral spn27A (8)	NaN	0.581086
CG4593-RA		Q9W3T2	Q9W3T2	Dorsal + Ventral spn27A (8)	NaN	-0.373811
ox	Cytochrome b-c1 complex subunit 9	Q9XY35	Q9XY35	Dorsal + Ventral spn27A (8)	NaN	-0.384976
		Q8MSE4	Q8MSE4	Dorsal + Ventral spn27A (8)	NaN	0.464197
Swim		Q7JWQ7	Q7JWQ7	Dorsal + Ventral spn27A (8)	NaN	-0.183924
		X2JAM4;X2JG79;Q7KV92;M9PEC5;Q0E8J1;M9MRP8;M9NFH6;M9MRN5;M9MRZ4;M9NEY0;M9MRQ1	X2JAM4;X2JG79;Q7KV92;M9PEC5;Q0E8J1	Dorsal + Ventral spn27A (8)	NaN	-0.143753
		Q9W4C2	Q9W4C2	Dorsal + Ventral spn27A (8)	NaN	0.17263
		Q9W3K3	Q9W3K3	Dorsal + Ventral spn27A (8)	NaN	-0.326621
CG3520-RA		Q9W1Q5	Q9W1Q5	Dorsal + Ventral spn27A (8)	NaN	0.702817
CG3570	Probable methyltransferase BTM2 homolog	Q9W138	Q9W138	Dorsal + Ventral spn27A (8)	NaN	-0.318983
mv		Q9W060	Q9W060	Dorsal + Ventral spn27A (8)	NaN	0.54222
		Q9VZJ4	Q9VZJ4	Dorsal + Ventral spn27A (8)	NaN	0.535433
mh		Q9VXU6	Q9VXU6	Dorsal + Ventral spn27A (8)	NaN	0.782899
Sap30	Histone deacetylase complex subunit SAP30 homolog	X2JKS9;Q9VXB3	X2JKS9;Q9VXB3	Dorsal + Ventral spn27A (8)	NaN	0.833487
parvin		Q9VWD0	Q9VWD0	Dorsal + Ventral spn27A (8)	NaN	-0.543297
		Q9VW10	Q9VW10	Dorsal + Ventral spn27A (8)	NaN	-0.260849
Taspase1		Q9VUX9	Q9VUX9	Dorsal + Ventral spn27A (8)	NaN	-0.503954
CG10171-RB		Q9VU64;Q8IQJ7	Q9VU64;Q8IQJ7	Dorsal + Ventral spn27A (8)	NaN	-0.585945
		Q9VU08	Q9VU08	Dorsal + Ventral spn27A (8)	NaN	0.987761
Atg12	Autophagy protein 12-like	Q9VTU1	Q9VTU1	Dorsal + Ventral spn27A (8)	NaN	0.441506
		Q9VSX7	Q9VSX7	Dorsal + Ventral spn27A (8)	NaN	1.08648
	NADPH-dependent diflavin oxidoreductase 1	Q9VSJ5	Q9VSJ5	Dorsal + Ventral spn27A (8)	NaN	-0.332636
		Q9VRZ7	Q9VRZ7	Dorsal + Ventral spn27A (8)	NaN	0.514557
Cyp6v1	Probable cytochrome P450 6v1	X2JGA6;Q9VRB3	X2JGA6;Q9VRB3	Dorsal + Ventral spn27A (8)	NaN	-0.26988
RFeSP	Cytochrome b-c1 complex subunit Rieske, mitochondrial	Q9VQ29	Q9VQ29	Dorsal + Ventral spn27A (8)	NaN	-0.208099
Mkrn1		Q9VP20	Q9VP20	Dorsal + Ventral spn27A (8)	NaN	0.517015
SPoCk	Calcium-transporting ATPase	Q9VNR2;C1C5A0;Q8IPS6;A8JNX2;M9PG15	Q9VNR2;C1C5A0;Q8IPS6;A8JNX2;M9PG15	Dorsal + Ventral spn27A (8)	NaN	-0.198106
CG1161	Uncharacterized protein CG1161	Q9VNA4;Q59E06	Q9VNA4;Q59E06	Dorsal + Ventral spn27A (8)	NaN	-0.657727
Marcal1	SWI/SNF-related matrix-associated actin-dependent regulator of chromatin subfamily A-like protein 1	Q9VMX6	Q9VMX6	Dorsal + Ventral spn27A (8)	NaN	-0.499969
CG8891	Inosine triphosphate pyrophosphatase	Q9VMW7	Q9VMW7	Dorsal + Ventral spn27A (8)	NaN	0.639712
Nuf2		Q9VM45	Q9VM45	Dorsal + Ventral spn27A (8)	NaN	0.480273
Trs23		Q9VLI9	Q9VLI9	Dorsal + Ventral spn27A (8)	NaN	0.736165
CG31712	UPF0430 protein CG31712	Q9VL63;M9PB85	Q9VL63;M9PB85	Dorsal + Ventral spn27A (8)	NaN	-0.323191
	Protein YIPF	Q9VK46	Q9VK46	Dorsal + Ventral spn27A (8)	NaN	0.783918
bru	Protein brunelleschi	Q9VIL0	Q9VIL0	Dorsal + Ventral spn27A (8)	NaN	0.69767
Zif		Q9VI24	Q9VI24	Dorsal + Ventral spn27A (8)	NaN	-0.561978
		Q9VHF6;Q8T0L6	Q9VHF6;Q8T0L6	Dorsal + Ventral spn27A (8)	NaN	0.927826
nmdyn-D7		Q9VH94	Q9VH94	Dorsal + Ventral spn27A (8)	NaN	-0.463071
CG5270	Zinc finger FYVE domain-containing protein 26 homolog	Q9VGP1	Q9VGP1	Dorsal + Ventral spn27A (8)	NaN	0.787939
CG5196-RA	Palmitoyltransferase	Q9VG80;Q8SWX8	Q9VG80;Q8SWX8	Dorsal + Ventral spn27A (8)	NaN	-0.115653
rdx	Protein roadkill	Q9VFP2	Q9VFP2	Dorsal + Ventral spn27A (8)	NaN	0.590672
ldlCp	Conserved oligomeric Golgi complex subunit 2	Q9VF78	Q9VF78	Dorsal + Ventral spn27A (8)	NaN	0.504963
		Q9VEY4	Q9VEY4	Dorsal + Ventral spn27A (8)	NaN	-0.383545
Vps39		Q9VEA2	Q9VEA2	Dorsal + Ventral spn27A (8)	NaN	0.399434
CG6353	Protein archease-like	Q9VD92	Q9VD92	Dorsal + Ventral spn27A (8)	NaN	0.863329
beta4GalT7		Q9VBZ9	Q9VBZ9	Dorsal + Ventral spn27A (8)	NaN	0.494649
		Q9VBR9	Q9VBR9	Dorsal + Ventral spn27A (8)	NaN	-0.470781
CG11882-RA		Q9VAN8	Q9VAN8	Dorsal + Ventral spn27A (8)	NaN	-0.308924
Vps16B		Q9VAG4	Q9VAG4	Dorsal + Ventral spn27A (8)	NaN	0.691378
		Q9V9W4	Q9V9W4	Dorsal + Ventral spn27A (8)	NaN	0.634988
Seipin	Seipin	Q9V3X4	Q9V3X4	Dorsal + Ventral spn27A (8)	NaN	-0.347094
Jafrac2		Q9V3Q4	Q9V3Q4	Dorsal + Ventral spn27A (8)	NaN	-0.221089
Drep4		Q9V3H0	Q9V3H0	Dorsal + Ventral spn27A (8)	NaN	0.663825
grau	Transcription factor grauzone	Q9U405	Q9U405	Dorsal + Ventral spn27A (8)	NaN	-0.236656
ltd		Q8T0G8	Q8T0G8	Dorsal + Ventral spn27A (8)	NaN	-0.395814
Ttc19	Tetratricopeptide repeat protein 19 homolog, mitochondrial	Q8SYD0	Q8SYD0	Dorsal + Ventral spn27A (8)	NaN	0.608185
Fancd2		Q8MYL1	Q8MYL1	Dorsal + Ventral spn27A (8)	NaN	0.657198
CG7231-RD		Q8MQP2;Q9VLU9	Q8MQP2;Q9VLU9	Dorsal + Ventral spn27A (8)	NaN	0.78461
Sirt4	NAD-dependent protein deacetylase Sirt4	Q8IRR5	Q8IRR5	Dorsal + Ventral spn27A (8)	NaN	-0.499596
		Q8IRD1	Q8IRD1	Dorsal + Ventral spn27A (8)	NaN	0.457951
Nc73EF		Q8IQQ0	Q8IQQ0	Dorsal + Ventral spn27A (8)	NaN	-0.328898
		Q7YZ99;Q9W0B0;A8JNI2;Q86BP9;X2J8K5	Q7YZ99;Q9W0B0;A8JNI2	Dorsal + Ventral spn27A (8)	NaN	0.366752
Spf45		Q7PL82	Q7PL82	Dorsal + Ventral spn27A (8)	NaN	-0.546837
sut1		Q7KK97	Q7KK97	Dorsal + Ventral spn27A (8)	NaN	-0.325161
		Q7K561	Q7K561	Dorsal + Ventral spn27A (8)	NaN	0.866038
Trs31		Q7K2Q8	Q7K2Q8	Dorsal + Ventral spn27A (8)	NaN	0.650478
ste24a		Q7K172	Q7K172	Dorsal + Ventral spn27A (8)	NaN	0.435054
		Q7K0W1	Q7K0W1	Dorsal + Ventral spn27A (8)	NaN	0.372741
		Q7JWR4	Q7JWR4	Dorsal + Ventral spn27A (8)	NaN	0.419145
Ntmt	Alpha N-terminal protein methyltransferase 1	Q6NN40	Q6NN40	Dorsal + Ventral spn27A (8)	NaN	0.617927
		Q5LJQ3	Q5LJQ3	Dorsal + Ventral spn27A (8)	NaN	0.637054
		Q4V429	Q4V429	Dorsal + Ventral spn27A (8)	NaN	0.466539
nrv2	Sodium/potassium-transporting ATPase subunit beta-2	Q1RL12;A4V0B5;Q24048	Q1RL12;A4V0B5;Q24048	Dorsal + Ventral spn27A (8)	NaN	0.760827
Fdh	Alcohol dehydrogenase class-3	P46415	P46415	Dorsal + Ventral spn27A (8)	NaN	0.355355
Dhfr	Dihydrofolate reductase	P17719	P17719	Dorsal + Ventral spn27A (8)	NaN	0.625836
RpL4	60S ribosomal protein L4	P09180	P09180	Dorsal + Ventral spn27A (8)	NaN	-0.465028
crm		O76912	O76912	Dorsal + Ventral spn27A (8)	NaN	0.495332
Rab7		O76742	O76742	Dorsal + Ventral spn27A (8)	NaN	-0.328006
CG14803	Protein MMS22-like	O46089;X2JA69	O46089;X2JA69	Dorsal + Ventral spn27A (8)	NaN	0.260558
EG:25E8.1		O46067	O46067	Dorsal + Ventral spn27A (8)	NaN	0.479324
Rab6	Ras-related protein Rab6	X2J5T3;O18334	X2J5T3;O18334	Dorsal + Ventral spn27A (8)	NaN	0.450119
RpL3	60S ribosomal protein L3	O16797	O16797	Dorsal + Ventral spn27A (8)	NaN	-0.487778
		Q9VXE7;M9PHS8	Q9VXE7;M9PHS8	Dorsal + Ventral spn27A (8)	NaN	0.435048
CG3634	Protein ST7 homolog	M9PFT2;Q9VPB1	M9PFT2;Q9VPB1	Dorsal + Ventral spn27A (8)	NaN	-0.373974
RpL13	60S ribosomal protein L13	M9PFF0;P41126	M9PFF0;P41126	Dorsal + Ventral spn27A (8)	NaN	-0.3609
		M9PEJ2	M9PEJ2	Dorsal + Ventral spn27A (8)	NaN	-0.366066
cni	Protein cornichon	M9PDJ6;P49858	M9PDJ6;P49858	Dorsal + Ventral spn27A (8)	NaN	-0.205829
stc	Protein shuttle craft	M9PDG3;M9PD57;P40798	M9PDG3;M9PD57;P40798	Dorsal + Ventral spn27A (8)	NaN	0.531146
Deaf1	Deformed epidermal autoregulatory factor 1	Q86LC7;M9PD02;Q24180;M9PFP9;E8NH34	Q86LC7;M9PD02;Q24180;M9PFP9;E8NH34	Dorsal + Ventral spn27A (8)	NaN	0.38579
Rack1	Guanine nucleotide-binding protein subunit beta-like protein	M9PCC1;O18640;M9PB67	M9PCC1;O18640	Dorsal + Ventral spn27A (8)	NaN	-0.478084
		Q9VQ83;M9PB06	Q9VQ83;M9PB06	Dorsal + Ventral spn27A (8)	NaN	-0.477997
R	Ras-like protein 3	M9MRT6;P08645	M9MRT6;P08645	Dorsal + Ventral spn27A (8)	NaN	-0.181956
Cals	Calsyntenin-1	X2J9E8;L0MQ08;Q9V498	X2J9E8;L0MQ08;Q9V498	Dorsal + Ventral spn27A (8)	NaN	-0.439076
		Q7KSI9;E1JIL1	Q7KSI9;E1JIL1	Dorsal + Ventral spn27A (8)	NaN	-0.545753
CaMKII		D1YSG8	D1YSG8	Dorsal + Ventral spn27A (8)	NaN	-0.481936
C3G	Guanine nucleotide-releasing factor 2	B7Z131;B7Z132;X2JIR4;M9PJ95;B7Z129;M9PGJ9;B7Z130;O77086	B7Z131;B7Z132;X2JIR4;M9PJ95;B7Z129;M9PGJ9;B7Z130;O77086	Dorsal + Ventral spn27A (8)	NaN	0.404053
CG4040-RA;CG42388-RF;CG42388-RC		B5RJS0;X2JAX8;D5SHR1;M9MQH0;H1UUM2	B5RJS0;X2JAX8;D5SHR1;M9MQH0;H1UUM2	Dorsal + Ventral spn27A (8)	NaN	0.726696
		A2VEK1	A2VEK1	Dorsal + Ventral spn27A (8)	NaN	0.598918
CG15099	Protein dopey-1 homolog	A1ZBE8	A1ZBE8	Dorsal + Ventral spn27A (8)	NaN	0.50222
MED9	Mediator of RNA polymerase II transcription subunit 9	A1ZB42	A1ZB42	Dorsal + Ventral spn27A (8)	NaN	-0.30176
Ehbp1		A1ZAN2;A4UZL2;B7YZI1;A4UZL3	A1ZAN2;A4UZL2;B7YZI1;A4UZL3	Dorsal + Ventral spn27A (8)	NaN	-0.414317
		A1Z9I6	A1Z9I6	Dorsal + Ventral spn27A (8)	NaN	0.581941
Mlh1		A1Z7C1;A0A0B4KEM3	A1Z7C1;A0A0B4KEM3	Dorsal + Ventral spn27A (8)	NaN	-0.414951
CG3376-RA	Sphingomyelin phosphodiesterase	Q8MLP3;A0A0B4LGL2;Q9W188;D6W4U0	Q8MLP3;A0A0B4LGL2;Q9W188;D6W4U0	Dorsal + Ventral spn27A (8)	NaN	-0.0066917
	Palmitoyltransferase	A0A0B4LF00;A1Z833;A0A0B4LEL6;A0A0B4LF16;Q7K2V5;A0A0B4KF56;E2QCN5	A0A0B4LF00;A1Z833;A0A0B4LEL6;A0A0B4LF16;Q7K2V5;A0A0B4KF56;E2QCN5	Dorsal + Ventral spn27A (8)	NaN	-0.683742
		A0A0B4KFS3;Q8T4A5	A0A0B4KFS3;Q8T4A5	Dorsal + Ventral spn27A (8)	NaN	0.855415
CG18812-RA;CG18812-RB;CG18812	Protein GDAP2 homolog	A1Z742;A0A0B4KEL9;A1Z741;D1Z396;A0A0B4KFB9;Q7JUR6	A1Z742;A0A0B4KEL9;A1Z741;D1Z396;A0A0B4KFB9;Q7JUR6	Dorsal + Ventral spn27A (8)	NaN	0.586977
Spase22-23	Signal peptidase complex subunit 3	A0A0B4K7R1;Q9VCA9	A0A0B4K7R1;Q9VCA9	Dorsal + Ventral spn27A (8)	NaN	-0.325003
Fmr1		A0A0B4K618	A0A0B4K618	Dorsal + Ventral spn27A (8)	NaN	-0.531764
plx		A0A0B4KG76;Q9VNG9;Q8IPP5;A0A0B4KGK7;E1JJ52	A0A0B4KG76;Q9VNG9;Q8IPP5;A0A0B4KGK7;E1JJ52	Dorsal + Ventral spn27A (8)	NaN	0.479011
stmA	Protein EFR3 homolog cmp44E	A0A0B4LFU5;Q8IGJ0	A0A0B4LFU5;Q8IGJ0	Dorsal + Ventral spn27A (8)	NaN	0.806578
		Q9VTT4;A0A0S0WNE9	Q9VTT4;A0A0S0WNE9	Dorsal + Ventral spn27A (8)	NaN	0.961742
LIMK1	LIM domain kinase 1	E1JJM7;Q8IR79;E1JJM8	E1JJM7;Q8IR79;E1JJM8	Dorsal + Ventral spn27A (8)	NaN	0.676979
		M9PDI7;Q8IRW6;M9PIQ9	M9PDI7;Q8IRW6;M9PIQ9	Dorsal + Ventral spn27A (8)	NaN	0.488017
comt	Vesicle-fusing ATPase 1	M9PH10;P46461	M9PH10;P46461	Dorsal + Ventral spn27A (8)	NaN	0.8971
CG14732		Q9VGG3;Q86B99;Q86B98	Q9VGG3;Q86B99;Q86B98	Dorsal + Ventral spn27A (8)	NaN	0.283044
		Q8SX24	Q8SX24	Dorsal + Ventral spn27A (8)	NaN	1.72233
Obp56a	General odorant-binding protein 56a	Q9V8Y2	Q9V8Y2	Dorsal + Ventral spn27A (8)	NaN	1.11737
		Q9VD22	Q9VD22	Dorsal + Ventral spn27A (8)	NaN	1.07844
LManII	Alpha-mannosidase	Q9VKV1	Q9VKV1	Dorsal + Ventral spn27A (8)	NaN	0.581033
RapGAP1		Q9VM00	Q9VM00	Dorsal + Ventral spn27A (8)	NaN	0.594741
		Q9VR04	Q9VR04	Dorsal + Ventral spn27A (8)	NaN	0.437006
CG12012-RA		Q9VZP9	Q9VZP9	Dorsal + Ventral spn27A (8)	NaN	0.603452
stl		Q9W1Z6	Q9W1Z6	Dorsal + Ventral spn27A (8)	NaN	1.24601
		Q8MKJ9	Q8MKJ9	Dorsal + Ventral spn27A (8)	NaN	0.568241
		Q9VZ63	Q9VZ63	Dorsal + Ventral spn27A (8)	NaN	0.692815
		Q9W513	Q9W513	Dorsal + Ventral spn27A (8)	NaN	0.494985
Gk		Q9W095	Q9W095	Dorsal + Ventral spn27A (8)	NaN	0.489664
		Q9VVM1	Q9VVM1	Dorsal + Ventral spn27A (8)	NaN	0.606878
frj		Q9VMD5	Q9VMD5	Dorsal + Ventral spn27A (8)	NaN	0.316529
Cyp4d21	Probable cytochrome P450 4d21	Q9VLZ7	Q9VLZ7	Dorsal + Ventral spn27A (8)	NaN	1.14485
		Q9VHX6	Q9VHX6	Dorsal + Ventral spn27A (8)	NaN	1.2621
mRpS24	28S ribosomal protein S24, mitochondrial	Q9VCC3	Q9VCC3	Dorsal + Ventral spn27A (8)	NaN	0.634435
l(2)k10201	Protein lethal(2)k10201	Q9V574	Q9V574	Dorsal + Ventral spn27A (8)	NaN	0.458638
pst		Q8IQ82;Q8IQ80	Q8IQ82;Q8IQ80	Dorsal + Ventral spn27A (8)	NaN	1.22037
		Q7JUN3	Q7JUN3	Dorsal + Ventral spn27A (8)	NaN	0.854904
		Q9VVJ0;M9PFK5	Q9VVJ0;M9PFK5	Dorsal + Ventral spn27A (8)	NaN	0.691177
Vm26Aa	Vitelline membrane protein Vm26Aa	M9PCA1;P11449	M9PCA1;P11449	Dorsal + Ventral spn27A (8)	NaN	1.5496
		A0A1L4AAD6	A0A1L4AAD6	Dorsal + Ventral spn27A (8)	NaN	0.316853
Hcs		Q9VNC3;A0A0B4LGM5;A0A0B4KF92;A0A0B4LGS6	Q9VNC3;A0A0B4LGM5;A0A0B4KF92;A0A0B4LGS6	Dorsal + Ventral spn27A (8)	NaN	0.441653
Cyp4e2	Cytochrome P450 4e2	A0A0B4LFT2;Q27606;Q9V4T5	A0A0B4LFT2;Q27606	Dorsal + Ventral spn27A (8)	NaN	1.31134
CG12895	Succinate dehydrogenase assembly factor 2, mitochondrial;Succinate dehydrogenase assembly factor 2-B, mitochondrial	A0A0B4KF96;A1Z897	A0A0B4KF96;A1Z897	Dorsal + Ventral spn27A (8)	NaN	0.56296
GstE3		A1ZB68	A1ZB68	Dorsal + Ventral spn27A (8)	NaN	0.232548
CG43346-RA		M9NEW0	M9NEW0	Dorsal + Ventral spn27A (8)	NaN	0.0309805
		Q9VXG9	Q9VXG9	Dorsal + Ventral spn27A (8)	NaN	0.0281026
foxo	Forkhead box protein O	A0A126GUT4;A0A0B4KGN1;Q95V55	A0A126GUT4;A0A0B4KGN1;Q95V55	Dorsal + Ventral spn27A (8)	NaN	0.0813668
CG16952-RB		X2JFM8;Q9VXM6	X2JFM8;Q9VXM6	Dorsal + Ventral spn27A (8)	NaN	-0.196283
		Q9VP36;M9PIG0	Q9VP36;M9PIG0	Dorsal + Ventral spn27A (8)	NaN	-0.0654254
bchs		Q9VML2	Q9VML2	Dorsal + Ventral spn27A (8)	NaN	0.079027
		Q9VKJ8	Q9VKJ8	Dorsal + Ventral spn27A (8)	NaN	-0.172208
		Q8SXX0	Q8SXX0	Dorsal + Ventral spn27A (8)	NaN	-0.155263
RN-tre		A1Z9K4;Q7KQC4;A0A0B4JD18;Q95RE0;A0A0B4KEQ5	A1Z9K4;Q7KQC4;A0A0B4JD18;Q95RE0;A0A0B4KEQ5	Dorsal + Ventral spn27A (8)	NaN	-0.29925
Pex1		Q9VUC7	Q9VUC7	Dorsal + Ventral spn27A (8)	NaN	0.456669
nmdyn-D6	Nucleoside diphosphate kinase	Q9VY27	Q9VY27	Dorsal + Ventral spn27A (8)	NaN	0.0420596
SMSr	Sphingomyelin synthase-related 1	Q9VS60	Q9VS60	Dorsal + Ventral spn27A (8)	NaN	0.493995
CG5969	Vacuolar ATPase assembly integral membrane protein VMA21 homolog	Q9VPE4	Q9VPE4	Dorsal + Ventral spn27A (8)	NaN	0.294692
Cyp6d4	Probable cytochrome P450 6d4	Q9VCW1	Q9VCW1	Dorsal + Ventral spn27A (8)	NaN	1.35358
		Q9VCC4	Q9VCC4	Dorsal + Ventral spn27A (8)	NaN	0.559212
		Q8MRT7	Q8MRT7	Dorsal + Ventral spn27A (8)	NaN	0.486855
		A0A0B4KEH8;A0A0B4KEC2;Q9W5H8;Q5LJQ4	A0A0B4KEH8;A0A0B4KEC2;Q9W5H8;Q5LJQ4	Dorsal + Ventral spn27A (8)	NaN	0.171414
mRpL16		Q9W547	Q9W547	Dorsal + Ventral Tl10B spn27A (9)	-0.0266222	-0.150159
		Q9W137	Q9W137	Dorsal + Ventral Tl10B spn27A (9)	0.156341	-0.192599
Ipk1	Inositol-pentakisphosphate 2-kinase	A0A0B4KEV9;A8DYK1;Q9W2Q7;A0A0B4LH15	A0A0B4KEV9;A8DYK1;Q9W2Q7;A0A0B4LH15	Dorsal + Ventral Tl10B spn27A (9)	-0.0817638	-0.339127
Kdm2	JmjC domain-containing histone demethylation protein 1	A0A0B4KFJ7;Q9VHH9	A0A0B4KFJ7;Q9VHH9	Dorsal + Ventral Tl10B spn27A (9)	-0.187409	-0.305528
UFSP1	Probable Ufm1-specific protease 1	A0A0B4LFP9;Q4V6M7	A0A0B4LFP9;Q4V6M7	Dorsal + Ventral Tl10B spn27A (9)	0.164625	-0.20981
pre-mod(mdg4)-C		A0A0B4LIG1	A0A0B4LIG1	Dorsal + Ventral Tl10B spn27A (9)	-0.121942	-0.192138
ana3		A1Z8X3	A1Z8X3	Dorsal + Ventral Tl10B spn27A (9)	-0.363341	-0.640142
Ama	Protein amalgam	A4V2I0;Q7KSX2;P15364	A4V2I0;Q7KSX2;P15364	Dorsal + Ventral Tl10B spn27A (9)	-0.185263	-0.303778
CG9662-RA;CG9662	Putative oligosaccharyltransferase complex subunit CG9662	E0R7Q5;Q9VQP9	E0R7Q5;Q9VQP9	Dorsal + Ventral Tl10B spn27A (9)	-0.135886	-0.318464
fs(1)N		O46100;M9PDG9	O46100;M9PDG9	Dorsal + Ventral Tl10B spn27A (9)	0.0667776	-0.0731937
CG34137-RA		Q0E8M3	Q0E8M3	Dorsal + Ventral Tl10B spn27A (9)	-0.167682	-0.346925
nec		Q7JWX3	Q7JWX3	Dorsal + Ventral Tl10B spn27A (9)	0.147578	-0.169382
		Q7K483	Q7K483	Dorsal + Ventral Tl10B spn27A (9)	-0.00140035	-0.14609
Sap130		Q8IQH9;Q8IQI0;M9PI47;M9PCC4;Q9XZ09	Q8IQH9;Q8IQI0;M9PI47;M9PCC4;Q9XZ09	Dorsal + Ventral Tl10B spn27A (9)	-0.167258	-0.383045
CG5147-RA		Q8SYM9	Q8SYM9	Dorsal + Ventral Tl10B spn27A (9)	0.0349357	-0.110012
CG9798	Elongation of very long chain fatty acids protein	Q95T98	Q95T98	Dorsal + Ventral Tl10B spn27A (9)	-0.29891	-0.42282
Cdc23		Q9I7L8;E1JHM5	Q9I7L8;E1JHM5	Dorsal + Ventral Tl10B spn27A (9)	-0.0122804	-0.146056
EG:BACR42I17.10		Q9V3C6	Q9V3C6	Dorsal + Ventral Tl10B spn27A (9)	0.0772821	-0.121453
Sp7		Q9V3Z2	Q9V3Z2	Dorsal + Ventral Tl10B spn27A (9)	-0.0861558	-0.424495
SPE		Q9VCJ8;Q8IN70	Q9VCJ8	Dorsal + Ventral Tl10B spn27A (9)	-0.119171	-0.524912
RpL24-like	Probable ribosome biogenesis protein RLP24	Q9VGN9	Q9VGN9	Dorsal + Ventral Tl10B spn27A (9)	0.0262426	-0.226923
		Q9VHV9	Q9VHV9	Dorsal + Ventral Tl10B spn27A (9)	-0.0582038	-0.318143
CG10055	Protein SHQ1 homolog	Q9VI74	Q9VI74	Dorsal + Ventral Tl10B spn27A (9)	-0.00513229	-0.290078
Spn28Dc		Q9VLU4	Q9VLU4	Dorsal + Ventral Tl10B spn27A (9)	-0.0186228	-0.502561
		Q9VNG2	Q9VNG2	Dorsal + Ventral Tl10B spn27A (9)	-0.139856	-0.321872
Tfb4		Q9VPX4	Q9VPX4	Dorsal + Ventral Tl10B spn27A (9)	-0.0283666	-0.360387
CG16713-RA		Q9VQT7	Q9VQT7	Dorsal + Ventral Tl10B spn27A (9)	0.144375	-0.163946
loj		Q9VRU2	Q9VRU2	Dorsal + Ventral Tl10B spn27A (9)	0.127039	-0.194863
		Q9VSE8	Q9VSE8	Dorsal + Ventral Tl10B spn27A (9)	-0.130662	-0.270725
CG9125	Decapping nuclease DXO homolog	Q9VXA8	Q9VXA8	Dorsal + Ventral Tl10B spn27A (9)	-0.0311967	-0.214523
Rrp47		Q9VXL4	Q9VXL4	Dorsal + Ventral Tl10B spn27A (9)	0.0224352	-0.193399
		Q9VY47;Q8MR65	Q9VY47	Dorsal + Ventral Tl10B spn27A (9)	-0.287919	-0.690587
sicily	NADH dehydrogenase (ubiquinone) complex I, assembly factor 6 homolog	X2JJK8;Q9VYS5	X2JJK8;Q9VYS5	Dorsal + Ventral Tl10B spn27A (9)	0.174091	0.0496045
		Q9VZZ6	Q9VZZ6	Dorsal + Ventral Tl10B spn27A (9)	-0.121464	-0.337245
		Q9W087;Q9VHQ9	Q9W087	Dorsal + Ventral Tl10B spn27A (9)	-0.0530015	-0.252064
Cypl	Peptidyl-prolyl cis-trans isomerase	Q9W0Q2	Q9W0Q2	Dorsal + Ventral Tl10B spn27A (9)	-0.293268	-0.507188
		Q9VZS7	Q9VZS7	Dorsal + Ventral Tl10B spn27A (9)	-0.344349	-0.384976
		Q9W0P4	Q9W0P4	Dorsal + Ventral Tl10B spn27A (9)	-0.124558	-0.122281
Start1		Q9W145;A0A0B4LGM4	Q9W145;A0A0B4LGM4	Dorsal + Ventral Tl10B spn27A (9)	-0.184939	-0.206406
enok	Histone acetyltransferase	Q9W1A9	Q9W1A9	Dorsal + Ventral Tl10B spn27A (9)	-0.226031	-0.0920561
		Q9W1H1	Q9W1H1	Dorsal + Ventral Tl10B spn27A (9)	-0.550341	-0.560167
	tRNA pseudouridine synthase	Q9W282	Q9W282	Dorsal + Ventral Tl10B spn27A (9)	-0.329885	-0.359988
		Q9W3N9	Q9W3N9	Dorsal + Ventral Tl10B spn27A (9)	-0.6986	-0.753613
		Q9W403	Q9W403	Dorsal + Ventral Tl10B spn27A (9)	-0.320769	-0.325548
Femcoat		Q9W4M3	Q9W4M3	Dorsal + Ventral Tl10B spn27A (9)	-0.155246	-0.162331
Bzd		Q9W4X8	Q9W4X8	Dorsal + Ventral Tl10B spn27A (9)	0.718637	0.517706
CG14805-RA		Q9W550	Q9W550	Dorsal + Ventral Tl10B spn27A (9)	-0.238789	-0.293946
EG:34F3.4		Q9W5D3	Q9W5D3	Dorsal + Ventral Tl10B spn27A (9)	0.0265715	0.0848852
botv	Exostosin-3	Q9XZ08	Q9XZ08	Dorsal + Ventral Tl10B spn27A (9)	-0.155691	-0.200887
XRCC1		Q9Y095	Q9Y095	Dorsal + Ventral Tl10B spn27A (9)	0.700163	0.665481
BcDNA.GH03377		Q9Y153	Q9Y153	Dorsal + Ventral Tl10B spn27A (9)	-0.245008	-0.168442
		X2JC02;X2J8M7;X2JCG0;E1JIB9;Q7KV98;Q9W016;E1JIC0;X2JAL9;M9PDU5;M9MRU6;Q9W013;Q8IRF0	X2JC02;X2J8M7;X2JCG0;E1JIB9;Q7KV98;Q9W016;E1JIC0;X2JAL9;M9PDU5	Dorsal + Ventral Tl10B spn27A (9)	0.0756219	-0.00852779
		R9PY27	R9PY27	Dorsal + Ventral Tl10B spn27A (9)	-0.212858	-0.341965
Tim9b	Mitochondrial import inner membrane translocase subunit Tim10B	Q9Y0V3	Q9Y0V3	Dorsal + Ventral Tl10B spn27A (9)	0.686837	0.640918
		Q9XZ12	Q9XZ12	Dorsal + Ventral Tl10B spn27A (9)	0.371014	0.283926
		Q9W5W6	Q9W5W6	Dorsal + Ventral Tl10B spn27A (9)	-0.157778	-0.197629
Vps26	Vacuolar protein sorting-associated protein 26	Q9W552	Q9W552	Dorsal + Ventral Tl10B spn27A (9)	-0.366304	-0.346942
eIF2B-epsilon		Q9W541	Q9W541	Dorsal + Ventral Tl10B spn27A (9)	-0.158344	-0.14042
GAA1		Q9W464	Q9W464	Dorsal + Ventral Tl10B spn27A (9)	-0.231034	-0.202834
		Q9W448;X2JDV7	Q9W448;X2JDV7	Dorsal + Ventral Tl10B spn27A (9)	-0.238329	-0.174972
Cht11		Q9W3V1	Q9W3V1	Dorsal + Ventral Tl10B spn27A (9)	0.477412	0.386695
Lst8	Protein LST8 homolog	Q9W328	Q9W328	Dorsal + Ventral Tl10B spn27A (9)	-0.216701	-0.209748
		Q9W1Y8	Q9W1Y8	Dorsal + Ventral Tl10B spn27A (9)	0.361147	0.349738
thoc5	THO complex subunit 5	Q9W1F4	Q9W1F4	Dorsal + Ventral Tl10B spn27A (9)	0.0458461	0.0226503
		Q9W1A8	Q9W1A8	Dorsal + Ventral Tl10B spn27A (9)	-0.129641	-0.223432
Orc4		Q9W102	Q9W102	Dorsal + Ventral Tl10B spn27A (9)	-0.219903	-0.257428
		Q9W0M5	Q9W0M5	Dorsal + Ventral Tl10B spn27A (9)	-0.136204	-0.286477
CG12006	GPI mannosyltransferase 3	Q9VZM5	Q9VZM5	Dorsal + Ventral Tl10B spn27A (9)	-0.0158082	-0.00419262
Ptp99A	Protein-tyrosine-phosphatase;Tyrosine-protein phosphatase 99A	A0A0B4JDF4;Q9VAL5;P35832	A0A0B4JDF4;Q9VAL5;P35832	Dorsal + Ventral Tl10B spn27A (9)	0.795562	0.938994
Mctp		Q7JZN2;A1ZBD6;A0A126GUP9;A0A0C4DHG8;A0A0B4KEZ6	Q7JZN2;A1ZBD6;A0A126GUP9;A0A0C4DHG8;A0A0B4KEZ6	Dorsal + Ventral Tl10B spn27A (9)	-0.57359	-0.68537
Uba1		A0A0B4KF46	A0A0B4KF46	Dorsal + Ventral Tl10B spn27A (9)	-0.418749	-0.369343
shn		Q0E9C5;A1Z8F4;A0A0B4KFC0	Q0E9C5;A1Z8F4;A0A0B4KFC0	Dorsal + Ventral Tl10B spn27A (9)	1.00853	0.731159
Ate1	Arginyl-tRNA--protein transferase 1	A0A0B4KFD5	A0A0B4KFD5	Dorsal + Ventral Tl10B spn27A (9)	-0.180758	-0.0879783
		Q9W1W8;A0A0B4KFG3	Q9W1W8;A0A0B4KFG3	Dorsal + Ventral Tl10B spn27A (9)	0.908242	0.806409
Arp5	Actin-related protein 5	A0A0B4KG83;Q9VEC3	A0A0B4KG83;Q9VEC3	Dorsal + Ventral Tl10B spn27A (9)	-0.315869	-0.45294
Aats-met	Methionine--tRNA ligase, mitochondrial	A0A0B4KH54;Q9VFL5	A0A0B4KH54;Q9VFL5	Dorsal + Ventral Tl10B spn27A (9)	-0.499314	-0.434295
sip3	E3 ubiquitin-protein ligase HRD1	A0A0B4KHH2;Q95SP2	A0A0B4KHH2;Q95SP2	Dorsal + Ventral Tl10B spn27A (9)	-0.271365	-0.32463
Tl	Protein toll	A0A0B4KHY4;P08953	A0A0B4KHY4;P08953	Dorsal + Ventral Tl10B spn27A (9)	-0.545987	-0.584999
		A0A0B4KHY8;Q9XZ32	A0A0B4KHY8;Q9XZ32	Dorsal + Ventral Tl10B spn27A (9)	-0.278607	-0.247089
		A8DY62;A0A0B4LES9	A8DY62;A0A0B4LES9	Dorsal + Ventral Tl10B spn27A (9)	0.667696	0.417075
CG10915	Uncharacterized protein CG10915	A0A0B4LFS3;Q8SX68	A0A0B4LFS3;Q8SX68	Dorsal + Ventral Tl10B spn27A (9)	-0.416901	-0.45997
CG11007	Thioredoxin-related transmembrane protein 2 homolog	A0A0B4LFY2;Q7JW12	A0A0B4LFY2;Q7JW12	Dorsal + Ventral Tl10B spn27A (9)	0.554032	0.609295
CalpA	Calpain-A;Calpain-A catalytic subunit	A8DYJ3;A0A0B4LG26;Q11002;Q9VFV0	A8DYJ3;A0A0B4LG26;Q11002	Dorsal + Ventral Tl10B spn27A (9)	-0.0741691	0.00108997
HmgZ	High mobility group protein Z	A0A0B4LG36;Q06943	A0A0B4LG36;Q06943	Dorsal + Ventral Tl10B spn27A (9)	-0.652672	-0.572616
Lpt		A0A0B4LGG6;Q9W1H0	A0A0B4LGG6;Q9W1H0	Dorsal + Ventral Tl10B spn27A (9)	-0.24498	-0.226639
Cyp6a22	Cytochrome P450 6a22	A0A0B4LGH5;Q9V769	A0A0B4LGH5;Q9V769	Dorsal + Ventral Tl10B spn27A (9)	-0.124291	-0.253795
		A0A0B4LGS5;Q8MRA9	A0A0B4LGS5;Q8MRA9	Dorsal + Ventral Tl10B spn27A (9)	0.999969	0.902643
Gie	ADP-ribosylation factor-like protein 8	A0A0B4LGT4;Q9VHV5	A0A0B4LGT4;Q9VHV5	Dorsal + Ventral Tl10B spn27A (9)	-0.374807	-0.305772
Elk		A0A0B4LGW2;A1ZB14	A0A0B4LGW2;A1ZB14	Dorsal + Ventral Tl10B spn27A (9)	0.664653	0.790001
RpL11	60S ribosomal protein L11	A0A0B4LGZ5;P46222	A0A0B4LGZ5;P46222	Dorsal + Ventral Tl10B spn27A (9)	-0.439797	-0.439387
Muted;muted	Biogenesis of lysosome-related organelles complex 1 subunit 5	A0A0B4LHG2;Q0KI28	A0A0B4LHG2;Q0KI28	Dorsal + Ventral Tl10B spn27A (9)	-0.495207	-0.454904
Gdh	Glutamate dehydrogenase	A0A0C4DHE7	A0A0C4DHE7	Dorsal + Ventral Tl10B spn27A (9)	-0.366302	-0.44709
CG1427-RC	O-phosphoseryl-tRNA(Sec) selenium transferase	A0A0C4DHG1;Q9VNE3;A0A0B4KF37	A0A0C4DHG1;Q9VNE3	Dorsal + Ventral Tl10B spn27A (9)	-0.414945	-0.4569
Gel	Gelsolin	A0A0C4DHG2;Q07171;A0A0C4DHG6	A0A0C4DHG2;Q07171;A0A0C4DHG6	Dorsal + Ventral Tl10B spn27A (9)	-0.34194	-0.365542
		A0A126GUP6	A0A126GUP6	Dorsal + Ventral Tl10B spn27A (9)	-0.582562	-0.755062
CG8726-RB		A1Z782;A1Z783;Q8MQL4	A1Z782;A1Z783;Q8MQL4	Dorsal + Ventral Tl10B spn27A (9)	0.707682	0.70086
rho-7		A1Z8R8	A1Z8R8	Dorsal + Ventral Tl10B spn27A (9)	-0.485227	-0.272729
CG13016-RA		A1Z9L5	A1Z9L5	Dorsal + Ventral Tl10B spn27A (9)	-0.0736616	-0.0127113
aPKC	Atypical protein kinase C;Protein kinase C	A1Z9X0;A0A0B4KFQ6;A0A0B4KEQ8;A0A0B4KEV2;A0A0B4JD78;A0A0B4KG15;A0A0B4JD26	A1Z9X0;A0A0B4KFQ6;A0A0B4KEQ8;A0A0B4KEV2;A0A0B4JD78;A0A0B4KG15;A0A0B4JD26	Dorsal + Ventral Tl10B spn27A (9)	-0.36466	-0.43187
CG8414	Polynucleotide 5-hydroxyl-kinase NOL9	A1ZA92	A1ZA92	Dorsal + Ventral Tl10B spn27A (9)	-0.114696	-0.0247818
		A1ZAM0	A1ZAM0	Dorsal + Ventral Tl10B spn27A (9)	1.06828	1.1399
Oxp		A1ZAW9	A1ZAW9	Dorsal + Ventral Tl10B spn27A (9)	0.560506	0.731378
		A1ZBU8	A1ZBU8	Dorsal + Ventral Tl10B spn27A (9)	0.780249	0.616871
Flo2;Flo-2	Flotillin-2	A4V4F2;M9PJN2;M9PHT0;F2FB46;M9PHL7;O61492;C9QP31	A4V4F2;M9PJN2;M9PHT0;F2FB46;M9PHL7;O61492;C9QP31	Dorsal + Ventral Tl10B spn27A (9)	-0.311896	-0.295046
slgA	Proline dehydrogenase 1, mitochondrial	A4V4U5;M9NHG9;M9NFJ2;Q04499	A4V4U5;M9NHG9;M9NFJ2;Q04499	Dorsal + Ventral Tl10B spn27A (9)	-0.243867	-0.287859
		A8DYT3;M9PE16;A8DYT2;Q9VQ67	A8DYT3;M9PE16;A8DYT2;Q9VQ67	Dorsal + Ventral Tl10B spn27A (9)	-0.245578	-0.205995
Vav	Protein vav	A8JUQ9;Q9NHV9;M9PHJ6	A8JUQ9;Q9NHV9;M9PHJ6	Dorsal + Ventral Tl10B spn27A (9)	-0.219522	-0.134406
boi		Q9W4Y6;A8JUV7	Q9W4Y6;A8JUV7	Dorsal + Ventral Tl10B spn27A (9)	1.21627	1.19791
		Q7PLP4;A8Y582;Q7PLP5	Q7PLP4;A8Y582;Q7PLP5	Dorsal + Ventral Tl10B spn27A (9)	-0.0413859	-0.10597
pes		B7Z031	B7Z031	Dorsal + Ventral Tl10B spn27A (9)	-0.374929	-0.375341
CG8786-RC;CG8786-RB		B7Z078;Q9VW25;B7Z083	B7Z078;Q9VW25	Dorsal + Ventral Tl10B spn27A (9)	-0.446383	-0.549354
		Q9VV51;D5AEK7;Q961F9	Q9VV51;D5AEK7;Q961F9	Dorsal + Ventral Tl10B spn27A (9)	-0.14349	-0.0864822
dl	Embryonic polarity protein dorsal	E1JHK3;C7LA93;P15330	E1JHK3;C7LA93;P15330	Dorsal + Ventral Tl10B spn27A (9)	-0.312421	-0.365083
WRNexo;WRNexo-RB	Werner Syndrome-like exonuclease	E1JIP3;Q9VE86;E8NH59	E1JIP3;Q9VE86;E8NH59	Dorsal + Ventral Tl10B spn27A (9)	-0.340778	-0.239313
CG7956-RA		E1JIS1;Q0KI33;Q59DV6;Q9VD98;E1JIS2	E1JIS1;Q0KI33;Q59DV6;Q9VD98;E1JIS2	Dorsal + Ventral Tl10B spn27A (9)	0.583428	0.482466
CkIalpha	Casein kinase I isoform alpha	E1JJI5;P54367	E1JJI5;P54367	Dorsal + Ventral Tl10B spn27A (9)	-0.284523	-0.286241
Rtf1-RA;Rtf1	RNA polymerase-associated protein Rtf1	H0RNK7;Q9W261	H0RNK7;Q9W261	Dorsal + Ventral Tl10B spn27A (9)	-0.308427	-0.287854
spo	Cytochrome P450 307a1	H8F4V5;Q9VRM7	H8F4V5;Q9VRM7	Dorsal + Ventral Tl10B spn27A (9)	-0.416443	-0.338197
Myo31DF	Myosin-IA	M9MRS7;Q23978	M9MRS7;Q23978	Dorsal + Ventral Tl10B spn27A (9)	-0.00459207	-0.0471507
Nrt	Neurotactin	M9MS15;P23654	M9MS15;P23654	Dorsal + Ventral Tl10B spn27A (9)	-0.28244	-0.229796
		M9MSL0;Q9VU16	M9MSL0;Q9VU16	Dorsal + Ventral Tl10B spn27A (9)	0.375912	0.439517
Rim2		M9ND06;Q9VQ37;M9NDD0	M9ND06;Q9VQ37;M9NDD0	Dorsal + Ventral Tl10B spn27A (9)	-0.328789	-0.523135
CG5110	Ragulator complex protein LAMTOR3 homolog	M9NEQ5;Q9VJD2	M9NEQ5;Q9VJD2	Dorsal + Ventral Tl10B spn27A (9)	-0.559574	-0.475859
Ubr1;UBR1	E3 ubiquitin-protein ligase UBR1	M9NFA7;Q9VX91	M9NFA7;Q9VX91	Dorsal + Ventral Tl10B spn27A (9)	-0.268327	-0.248532
		Q9VQ16;M9PAZ8	Q9VQ16;M9PAZ8	Dorsal + Ventral Tl10B spn27A (9)	-0.534378	-0.446087
AIF	Putative apoptosis-inducing factor 1, mitochondrial	M9PBQ4;Q9VQ79	M9PBQ4;Q9VQ79	Dorsal + Ventral Tl10B spn27A (9)	-0.367514	-0.42086
MED20	Mediator of RNA polymerase II transcription subunit 20	M9PCC3;P91641	M9PCC3;P91641	Dorsal + Ventral Tl10B spn27A (9)	-0.220716	-0.0717128
NHP2	H/ACA ribonucleoprotein complex subunit 2-like protein	M9PCI2;Q9V3U2	M9PCI2;Q9V3U2	Dorsal + Ventral Tl10B spn27A (9)	0.527236	0.516591
CG13090	'Adenylyltransferase and sulfurtransferase MOCS3;Adenylyltransferase and sulfurtransferase MOCS3;Molybdopterin-synthase adenylylt...' <Preview truncated at 128 characters>	M9PCK7;Q9VLJ8	M9PCK7;Q9VLJ8	Dorsal + Ventral Tl10B spn27A (9)	-0.067729	-0.217393
Eip71CD	Peptide methionine sulfoxide reductase	M9PCL6;P08761;Q7KUM8;M9PI66;Q7KUN2	M9PCL6;P08761;Q7KUM8;M9PI66	Dorsal + Ventral Tl10B spn27A (9)	-0.124297	-0.0598389
		M9PCP3;Q9VMK9	M9PCP3;Q9VMK9	Dorsal + Ventral Tl10B spn27A (9)	1.04553	1.18086
Edem2	alpha-1,2-Mannosidase	M9PCV1;Q9VK27	M9PCV1;Q9VK27	Dorsal + Ventral Tl10B spn27A (9)	0.81992	0.637194
CG2614	Methyltransferase-like protein 13	M9PDA6;Q9VIK9	M9PDA6;Q9VIK9	Dorsal + Ventral Tl10B spn27A (9)	-0.56557	-0.472947
Adat1;adat	tRNA-specific adenosine deaminase 1	M9PDF5;Q9V3R6	M9PDF5;Q9V3R6	Dorsal + Ventral Tl10B spn27A (9)	0.907735	0.764461
PI4KIIIalpha		Q9W4X4;M9PDM4	Q9W4X4;M9PDM4	Dorsal + Ventral Tl10B spn27A (9)	-0.709636	-0.527714
CG3714	Nicotinate phosphoribosyltransferase	M9PEF6;Q9VQX4;M9PC31	M9PEF6;Q9VQX4;M9PC31	Dorsal + Ventral Tl10B spn27A (9)	0.949072	1.05993
		M9PEJ9;M9PF10;Q9VSM4	M9PEJ9;M9PF10;Q9VSM4	Dorsal + Ventral Tl10B spn27A (9)	0.433145	0.512994
		M9PEL5;Q9VST7	M9PEL5;Q9VST7	Dorsal + Ventral Tl10B spn27A (9)	-0.226706	-0.165951
		M9PEW1	M9PEW1	Dorsal + Ventral Tl10B spn27A (9)	-0.354811	-0.320667
l(3)72Dn		Q9VUZ6;M9PFG1	Q9VUZ6;M9PFG1	Dorsal + Ventral Tl10B spn27A (9)	-0.350835	-0.407838
		M9PGD7;Q9W4R9	M9PGD7;Q9W4R9	Dorsal + Ventral Tl10B spn27A (9)	-0.480418	-0.469252
RpL10	60S ribosomal protein L10	M9PIM0;O61231	M9PIM0;O61231	Dorsal + Ventral Tl10B spn27A (9)	-0.30134	-0.330071
Chd3	Chromodomain-helicase-DNA-binding protein 3	O16102	O16102	Dorsal + Ventral Tl10B spn27A (9)	-0.586003	-0.59078
Rab14		O18336;Q86BK8	O18336;Q86BK8	Dorsal + Ventral Tl10B spn27A (9)	-0.346772	-0.277828
Pgam5	Serine/threonine-protein phosphatase Pgam5, mitochondrial	O46084	O46084	Dorsal + Ventral Tl10B spn27A (9)	-0.302117	-0.299596
Ocrl		O46094	O46094	Dorsal + Ventral Tl10B spn27A (9)	-0.359236	-0.465437
rpk		O46342;A0A0B4K691;Q9VS73	O46342;A0A0B4K691	Dorsal + Ventral Tl10B spn27A (9)	-0.0133992	-0.003793
AP-2mu		O62530	O62530	Dorsal + Ventral Tl10B spn27A (9)	-0.475416	-0.400936
NitFhit	Nitrilase and fragile histidine triad fusion protein NitFhit;Bis(5-adenosyl)-triphosphatase;Nitrilase homolog	O76464	O76464	Dorsal + Ventral Tl10B spn27A (9)	-0.0831686	-0.166385
KdelR	ER lumen protein-retaining receptor	O76767	O76767	Dorsal + Ventral Tl10B spn27A (9)	-0.451733	-0.419856
EG:132E8.3		O76877	O76877	Dorsal + Ventral Tl10B spn27A (9)	0.580466	0.494879
aub	Protein aubergine	O76922	O76922	Dorsal + Ventral Tl10B spn27A (9)	-0.139472	-0.130246
cm		O76928	O76928	Dorsal + Ventral Tl10B spn27A (9)	-0.270076	-0.357834
EG:115C2.6		Q9W5E6;O77260	Q9W5E6;O77260	Dorsal + Ventral Tl10B spn27A (9)	-0.587772	-0.573239
EG:22E5.5		O77266;Q960D4	O77266;Q960D4	Dorsal + Ventral Tl10B spn27A (9)	-0.181394	-0.243363
JTBR		O96067	O96067	Dorsal + Ventral Tl10B spn27A (9)	-0.237982	-0.21642
pug	'C-1-tetrahydrofolate synthase, cytoplasmic;Methylenetetrahydrofolate dehydrogenase;Methenyltetrahydrofolate cyclohydrolase;Formy...' <Preview truncated at 128 characters>	O96553;A0A0B4K623	O96553;A0A0B4K623	Dorsal + Ventral Tl10B spn27A (9)	-0.284118	-0.423127
CDC45L		O96989	O96989	Dorsal + Ventral Tl10B spn27A (9)	-0.183679	-0.313257
Axs	Anoctamin	O97132	O97132	Dorsal + Ventral Tl10B spn27A (9)	-0.258899	-0.314408
Btk29A	Tyrosine-protein kinase Btk29A	P08630	P08630	Dorsal + Ventral Tl10B spn27A (9)	-0.124953	-0.197588
Atpalpha	Sodium/potassium-transporting ATPase subunit alpha	P13607;E1JIR4;A0A0B4KGG8	P13607;E1JIR4;A0A0B4KGG8	Dorsal + Ventral Tl10B spn27A (9)	-0.304084	-0.308598
Galphai	G protein alpha i subunit	P20353	P20353	Dorsal + Ventral Tl10B spn27A (9)	-0.14452	-0.162003
me31B	Putative ATP-dependent RNA helicase me31b	P23128	P23128	Dorsal + Ventral Tl10B spn27A (9)	-0.34605	-0.278604
Map205	205 kDa microtubule-associated protein	Q8IMF5;P23226	Q8IMF5;P23226	Dorsal + Ventral Tl10B spn27A (9)	-0.210783	-0.29081
Galphaq	G protein alpha q subunit	P23625	P23625	Dorsal + Ventral Tl10B spn27A (9)	0.0424533	-0.0969152
osk	Maternal effect protein oskar	P25158;A0A126GUR4	P25158	Dorsal + Ventral Tl10B spn27A (9)	0.532339	0.494852
Sos	Protein son of sevenless	P26675	P26675	Dorsal + Ventral Tl10B spn27A (9)	-0.388279	-0.227903
RpL7	60S ribosomal protein L7	X2J5G6;P32100	X2J5G6;P32100	Dorsal + Ventral Tl10B spn27A (9)	-0.468558	-0.488321
nullo	Protein nullo	P32845	P32845	Dorsal + Ventral Tl10B spn27A (9)	0.804632	0.78406
RpS4	40S ribosomal protein S4	X2JGM9;P41042	X2JGM9;P41042	Dorsal + Ventral Tl10B spn27A (9)	-0.463826	-0.50001
eIF-2alpha	Eukaryotic translation initiation factor 2 subunit 1	X2JFR6;P41374	X2JFR6;P41374	Dorsal + Ventral Tl10B spn27A (9)	-0.411353	-0.39057
Arp6	Actin-related protein 6	P45890	P45890	Dorsal + Ventral Tl10B spn27A (9)	-0.290923	-0.22699
Su(var)3-9	Histone-lysine N-methyltransferase Su(var)3-9	P45975	P45975	Dorsal + Ventral Tl10B spn27A (9)	-0.473932	-0.485902
RpL7A	60S ribosomal protein L7a	X2JCS6;P46223	X2JCS6;P46223	Dorsal + Ventral Tl10B spn27A (9)	-0.532337	-0.459641
eIF6	Eukaryotic translation initiation factor 6	P56538	P56538	Dorsal + Ventral Tl10B spn27A (9)	-0.0184061	-0.0502718
Dyrk3	Putative dual specificity tyrosine-phosphorylation-regulated kinase 3 homolog	P83102	P83102	Dorsal + Ventral Tl10B spn27A (9)	0.671348	0.657267
kel	Ring canal kelch protein;Kelch short protein	Q04652	Q04652	Dorsal + Ventral Tl10B spn27A (9)	-0.374373	-0.461188
Mpcp		Q0E8E8	Q0E8E8	Dorsal + Ventral Tl10B spn27A (9)	-0.380727	-0.428364
Mkp-RB	tRNA pseudouridine synthase	Q0E8K6	Q0E8K6	Dorsal + Ventral Tl10B spn27A (9)	-0.177073	-0.328763
step		Q0E8N2;Q9V9Q6	Q0E8N2;Q9V9Q6	Dorsal + Ventral Tl10B spn27A (9)	0.98408	0.632412
		Q1LZ24	Q1LZ24	Dorsal + Ventral Tl10B spn27A (9)	-0.401803	-0.468876
mei-9	DNA repair endonuclease XPF	T2FFI3;Q24087	T2FFI3;Q24087	Dorsal + Ventral Tl10B spn27A (9)	-0.381491	-0.39442
brn	Beta-1,3-galactosyltransferase brn	Q24157	Q24157	Dorsal + Ventral Tl10B spn27A (9)	-0.00552294	-0.039498
Ost48	Dolichyl-diphosphooligosaccharide--protein glycosyltransferase 48 kDa subunit	Q24319	Q24319	Dorsal + Ventral Tl10B spn27A (9)	-0.431046	-0.386043
l(2)tid;l(2)tid-RA	Protein tumorous imaginal discs, mitochondrial	Q27237;A0A0B4K7M9;D3DN23;Q7KVH7	Q27237;A0A0B4K7M9;D3DN23;Q7KVH7	Dorsal + Ventral Tl10B spn27A (9)	-0.430042	-0.363563
tam	DNA polymerase subunit gamma-1, mitochondrial	Q27607	Q27607	Dorsal + Ventral Tl10B spn27A (9)	-0.134711	-0.117578
		Q4V665	Q4V665	Dorsal + Ventral Tl10B spn27A (9)	-0.466482	-0.469263
		Q5U0X8	Q5U0X8	Dorsal + Ventral Tl10B spn27A (9)	-0.212664	-0.270672
CG34015-RA		Q6IIA4	Q6IIA4	Dorsal + Ventral Tl10B spn27A (9)	0.269977	0.179778
CG34008-RA		Q6IJL2	Q6IJL2	Dorsal + Ventral Tl10B spn27A (9)	0.576206	0.44965
pgant5	Polypeptide N-acetylgalactosaminyltransferase 5	Q6WV17	Q6WV17	Dorsal + Ventral Tl10B spn27A (9)	1.42996	0.948799
GalNAc-T1	Polypeptide N-acetylgalactosaminyltransferase 1;Polypeptide N-acetylgalactosaminyltransferase	Q6WV20;A0A0B4LFI4	Q6WV20;A0A0B4LFI4	Dorsal + Ventral Tl10B spn27A (9)	-0.122047	-0.0304997
		Q7JVW5	Q7JVW5	Dorsal + Ventral Tl10B spn27A (9)	-0.474104	-0.411067
		Q7JVX3;Q9VCM8	Q7JVX3;Q9VCM8	Dorsal + Ventral Tl10B spn27A (9)	-0.293247	-0.259653
Usp20-33	Ubiquitin carboxyl-terminal hydrolase	Q7JW61	Q7JW61	Dorsal + Ventral Tl10B spn27A (9)	0.101361	0.0745658
Roc2		Q7JWH5	Q7JWH5	Dorsal + Ventral Tl10B spn27A (9)	-0.473757	-0.461595
		Q7JXC6	Q7JXC6	Dorsal + Ventral Tl10B spn27A (9)	-0.249857	-0.481955
		Q7JY89	Q7JY89	Dorsal + Ventral Tl10B spn27A (9)	0.795076	0.353749
		Q7JZ37;Q7JRI4	Q7JZ37;Q7JRI4	Dorsal + Ventral Tl10B spn27A (9)	-0.533701	-0.539294
		Q7K0F7	Q7K0F7	Dorsal + Ventral Tl10B spn27A (9)	-0.304206	-0.370374
		Q7K0K1	Q7K0K1	Dorsal + Ventral Tl10B spn27A (9)	-0.337175	-0.329566
JhI-26		Q7K0P0	Q7K0P0	Dorsal + Ventral Tl10B spn27A (9)	0.539061	0.753342
		Q7K1C5	Q7K1C5	Dorsal + Ventral Tl10B spn27A (9)	0.552499	0.534391
Ciao1	Probable cytosolic iron-sulfur protein assembly protein Ciao1	Q7K1Y4	Q7K1Y4	Dorsal + Ventral Tl10B spn27A (9)	-0.120644	-0.160326
cbc	Protein CLP1 homolog	Q7K284	Q7K284	Dorsal + Ventral Tl10B spn27A (9)	-0.265301	-0.318233
CG7137	Ribosomal RNA-processing protein 8	Q7K2B0	Q7K2B0	Dorsal + Ventral Tl10B spn27A (9)	-0.242734	-0.336935
nopo		Q7K2X1;A0A0B4KFV0	Q7K2X1;A0A0B4KFV0	Dorsal + Ventral Tl10B spn27A (9)	0.654249	0.395973
CG11504-RA		Q7K4R2	Q7K4R2	Dorsal + Ventral Tl10B spn27A (9)	-0.333229	-0.371958
EG:87B1.3		Q7K511	Q7K511	Dorsal + Ventral Tl10B spn27A (9)	-0.349266	-0.299909
		Q7K533	Q7K533	Dorsal + Ventral Tl10B spn27A (9)	0.867058	0.628011
heph		Q7KES3	Q7KES3	Dorsal + Ventral Tl10B spn27A (9)	-0.597775	-0.705695
BcDNA.GH04637		Q7KK51	Q7KK51	Dorsal + Ventral Tl10B spn27A (9)	-0.0898146	-0.0728688
Dp1		Q7KN75	Q7KN75	Dorsal + Ventral Tl10B spn27A (9)	-0.333032	-0.312052
Ppcs		Q7KN99;E2QD26	Q7KN99;E2QD26	Dorsal + Ventral Tl10B spn27A (9)	-0.430733	-0.578637
Pngl	Peptide-N(4)-(N-acetyl-beta-glucosaminyl)asparagine amidase	Q7KRR5	Q7KRR5	Dorsal + Ventral Tl10B spn27A (9)	-0.267169	-0.327148
MRP		Q9I7N0;Q7KTC7;Q7KTD0;Q7KTC8;Q7KTC3;Q7KTC1;Q7KTC9;Q7KTC6;Q7KTC5;Q7KTC2;Q7KTB9;Q7KTB8;Q9VK56;Q7KTC0;A0A0S0WIA2	Q9I7N0;Q7KTC7;Q7KTD0;Q7KTC8;Q7KTC3;Q7KTC1;Q7KTC9;Q7KTC6;Q7KTC5;Q7KTC2;Q7KTB9;Q7KTB8;Q9VK56;Q7KTC0;A0A0S0WIA2	Dorsal + Ventral Tl10B spn27A (9)	-0.026562	0.00374166
park	E3 ubiquitin-protein ligase parkin	Q7KTX7	Q7KTX7	Dorsal + Ventral Tl10B spn27A (9)	0.554996	0.571415
Pi3K21B		Q7KTZ2;M9PAY7	Q7KTZ2	Dorsal + Ventral Tl10B spn27A (9)	-0.361828	-0.452237
lt		Q7PL76;Q8MT46	Q7PL76;Q8MT46	Dorsal + Ventral Tl10B spn27A (9)	0.65699	0.896824
AGO3	Protein argonaute-3	Q7PLK0	Q7PLK0	Dorsal + Ventral Tl10B spn27A (9)	-0.0872996	-0.0123602
Marf	Transmembrane GTPase Marf	Q7YU24	Q7YU24	Dorsal + Ventral Tl10B spn27A (9)	-0.221225	-0.309442
CG31064-RB		Q8IMP2;A0A0B4LHR8;Q8IMP1;A0A126GV26;A0A0B4LHR2;Q8IMP0	Q8IMP2;A0A0B4LHR8;Q8IMP1;A0A126GV26;A0A0B4LHR2;Q8IMP0	Dorsal + Ventral Tl10B spn27A (9)	-0.129838	-0.0786146
		Q8IMU0	Q8IMU0	Dorsal + Ventral Tl10B spn27A (9)	-0.172193	-0.380182
Cul3		Q9V475;Q8IP45	Q9V475;Q8IP45	Dorsal + Ventral Tl10B spn27A (9)	-0.309963	-0.320366
		Q8IQH6;Q9VU17	Q8IQH6;Q9VU17	Dorsal + Ventral Tl10B spn27A (9)	0.663084	0.592228
Gpi1		Q8IR17	Q8IR17	Dorsal + Ventral Tl10B spn27A (9)	-0.630476	-0.604001
		Q8IR76;Q9VYI5	Q8IR76;Q9VYI5	Dorsal + Ventral Tl10B spn27A (9)	0.296504	0.337795
YT521-B		Q8IRD2;Q9VZQ1	Q8IRD2;Q9VZQ1	Dorsal + Ventral Tl10B spn27A (9)	0.849999	0.73049
CG2990-RB		Q8IRL9;Q9W2Z4	Q8IRL9;Q9W2Z4	Dorsal + Ventral Tl10B spn27A (9)	-0.466494	-0.484277
IM10	Immune-induced peptides;Immune-induced peptide 10;Immune-induced peptide 12;Immune-induced peptide 13;Immune-induced peptide 24	Q8ML70	Q8ML70	Dorsal + Ventral Tl10B spn27A (9)	1.92455	0.890845
ave	Protein aveugle	Q8ML92	Q8ML92	Dorsal + Ventral Tl10B spn27A (9)	1.02103	0.90639
		Q8MRM6;Q9W3D6	Q8MRM6;Q9W3D6	Dorsal + Ventral Tl10B spn27A (9)	-0.384304	-0.247957
Tim23		Q8MRW1	Q8MRW1	Dorsal + Ventral Tl10B spn27A (9)	0.514514	0.468588
Sec61alpha		Q8STG9	Q8STG9	Dorsal + Ventral Tl10B spn27A (9)	-0.127478	-0.206341
		Q8SX92;Q9W091	Q8SX92;Q9W091	Dorsal + Ventral Tl10B spn27A (9)	0.513861	0.470445
bai	Transmembrane emp24 domain-containing protein bai	Q8SXY6	Q8SXY6	Dorsal + Ventral Tl10B spn27A (9)	-0.347801	-0.374141
CG6316		Q8SZY9	Q8SZY9	Dorsal + Ventral Tl10B spn27A (9)	0.660587	0.644153
		Q8T014;Q9VZU9;Q6NLL3	Q8T014;Q9VZU9;Q6NLL3	Dorsal + Ventral Tl10B spn27A (9)	0.496558	0.783102
	Phospholipid-transporting ATPase	Q8T0I4;B7YZF5;B7YZF9;B7YZF7;A1Z9C8;A0A0B4K7Y0;A0A0B4JD16;B7YZG0;B7YZF8	Q8T0I4;B7YZF5;B7YZF9;B7YZF7;A1Z9C8;A0A0B4K7Y0;A0A0B4JD16;B7YZG0;B7YZF8	Dorsal + Ventral Tl10B spn27A (9)	-0.169691	-0.217865
		Q8T0N5	Q8T0N5	Dorsal + Ventral Tl10B spn27A (9)	-0.276677	-0.39292
scpr-B;scpr-C;scpr-A		Q9VGQ4;Q8T3W8;Q9VGQ3	Q9VGQ4;Q8T3W8;Q9VGQ3	Dorsal + Ventral Tl10B spn27A (9)	-0.230726	-0.175934
dlt	Protein disks lost	Q8T626	Q8T626	Dorsal + Ventral Tl10B spn27A (9)	-0.12443	-0.216277
		Q8T8T9	Q8T8T9	Dorsal + Ventral Tl10B spn27A (9)	1.52542	1.6529
Dlc90F	Dynein light chain Tctex-type	Q94524	Q94524	Dorsal + Ventral Tl10B spn27A (9)	-0.110346	-0.0698896
Git		Q95RG8	Q95RG8	Dorsal + Ventral Tl10B spn27A (9)	0.364376	0.504386
		Q95RQ7	Q95RQ7	Dorsal + Ventral Tl10B spn27A (9)	0.908262	0.821461
wls	Protein wntless	Q95ST2	Q95ST2	Dorsal + Ventral Tl10B spn27A (9)	-0.323909	-0.35667
Naa60	N-alpha-acetyltransferase 60	Q95SX8	Q95SX8	Dorsal + Ventral Tl10B spn27A (9)	0.994193	1.13808
CycG		Q95TJ9	Q95TJ9	Dorsal + Ventral Tl10B spn27A (9)	0.754485	0.563856
PhKgamma		Q961E7;X2JEJ4;Q9I7D0	Q961E7;X2JEJ4;Q9I7D0	Dorsal + Ventral Tl10B spn27A (9)	-0.179055	-0.257363
mRpL36	Ribosomal protein	Q9I7Q9	Q9I7Q9	Dorsal + Ventral Tl10B spn27A (9)	-0.312988	-0.221136
Cnb		Q9I7U5	Q9I7U5	Dorsal + Ventral Tl10B spn27A (9)	-0.903002	-0.918274
		Q9I7Z8	Q9I7Z8	Dorsal + Ventral Tl10B spn27A (9)	0.276263	0.530296
krz		Q9V393	Q9V393	Dorsal + Ventral Tl10B spn27A (9)	-0.551637	-0.595379
rtet		Q9V395	Q9V395	Dorsal + Ventral Tl10B spn27A (9)	1.03256	1.08408
RabX1		Q9V3C2	Q9V3C2	Dorsal + Ventral Tl10B spn27A (9)	-0.131125	-0.182119
Nab2		Q9V3H9	Q9V3H9	Dorsal + Ventral Tl10B spn27A (9)	0.558086	0.452696
NP15.6		Q9V3L7	Q9V3L7	Dorsal + Ventral Tl10B spn27A (9)	-0.343737	-0.339342
Mtch		Q9V3Y4	Q9V3Y4	Dorsal + Ventral Tl10B spn27A (9)	-0.405927	-0.328889
CG9776	Zinc finger matrin-type protein CG9776	Q9V468	Q9V468	Dorsal + Ventral Tl10B spn27A (9)	-0.372563	-0.272902
PlexA		Q9V491;H9XVP3;Q0KIF1	Q9V491;H9XVP3;Q0KIF1	Dorsal + Ventral Tl10B spn27A (9)	-0.0210433	0.0241451
Sec61gamma;SEC61G1	Protein transport protein Sec61 gamma-2 subunit;Protein transport protein Sec61 gamma-1 subunit	X2JCL6;Q9VWE9;Q9V668	X2JCL6;Q9VWE9;Q9V668	Dorsal + Ventral Tl10B spn27A (9)	1.73596	1.69607
cid	Histone H3-like centromeric protein cid	Q9V6Q2	Q9V6Q2	Dorsal + Ventral Tl10B spn27A (9)	-0.224971	-0.335358
Tif-IA		Q9V9M6	Q9V9M6	Dorsal + Ventral Tl10B spn27A (9)	-0.453302	-0.579519
pygo	Protein pygopus	Q9V9W8	Q9V9W8	Dorsal + Ventral Tl10B spn27A (9)	-0.132191	-0.186477
Cog7	Conserved oligomeric Golgi complex subunit 7	Q9VAD6	Q9VAD6	Dorsal + Ventral Tl10B spn27A (9)	-0.266906	-0.247065
Bub3		Q9VAJ2	Q9VAJ2	Dorsal + Ventral Tl10B spn27A (9)	-0.354756	-0.427248
beta4GalNAcTB		Q9VAQ8	Q9VAQ8	Dorsal + Ventral Tl10B spn27A (9)	-0.253476	-0.388445
mfrn	Mitoferrin	Q9VAY3	Q9VAY3	Dorsal + Ventral Tl10B spn27A (9)	0.47482	0.442095
		Q9VB06	Q9VB06	Dorsal + Ventral Tl10B spn27A (9)	1.18688	0.862267
Hmu		Q9VB46	Q9VB46	Dorsal + Ventral Tl10B spn27A (9)	-0.327753	-0.274205
		Q9VB64	Q9VB64	Dorsal + Ventral Tl10B spn27A (9)	-0.110323	-0.00018095
		Q9VBF0;A0A0B4KH14	Q9VBF0;A0A0B4KH14	Dorsal + Ventral Tl10B spn27A (9)	-0.173475	-0.142608
Dak1	UMP-CMP kinase	Q9VBI2	Q9VBI2	Dorsal + Ventral Tl10B spn27A (9)	-0.391764	-0.471904
		Q9VBU5	Q9VBU5	Dorsal + Ventral Tl10B spn27A (9)	-0.22553	-0.0757135
Mink		Q9VC08	Q9VC08	Dorsal + Ventral Tl10B spn27A (9)	0.55987	0.47526
		Q9VC20;Q9VC19	Q9VC20;Q9VC19	Dorsal + Ventral Tl10B spn27A (9)	0.511466	0.285676
asp	Protein abnormal spindle	Q9VC45	Q9VC45	Dorsal + Ventral Tl10B spn27A (9)	-0.0310667	-0.0131273
[truncated: 639 more rows]

## Sheet: Phos_Deviation_DVClusters1-12
Phospho_ID	Gene_Name	Protein_Name	Protein_ID	Majority_Protein_ID	DV Cluster	Phospho_Log2FCDev_TL	Phospho_Log2FCDev_SP
960	CG4449-RA;CG4449	Uncharacterized protein CG4449	A0A0B4KHP8	A0A0B4KHP8	Dorsal (1)	0.255436	0.299554
13086	Elba2		Q9VQD6	Q9VQD6	Dorsal (1)	NaN	0.367655
12254	TfIIFalpha	General transcription factor IIF subunit 1	Q05913	Q05913	Dorsal (1)	0.330343	0.369134
1079	coil		A0A0B4LEV8	A0A0B4LEV8	Dorsal (1)	0.246893	0.282923
1205	thr	Protein three rows	A0A0B4LFY0	A0A0B4LFY0	Dorsal (1)	0.0752115	0.182627
1320	XNP		A0A0B4LHR3	A0A0B4LHR3	Dorsal (1)	NaN	0.560223
1584	NAT1		A1Z968	A1Z968	Dorsal (1)	0.142294	0.1934
1923	sgg	Protein kinase shaggy	A4V3W2	A4V3W2	Dorsal (1)	0.155632	0.219655
2887	Capr	Caprin homolog	E4NKG1	E4NKG1	Dorsal (1)	NaN	0.10021
2930	PGRP-LD-RB;Pmi	Transmembrane protein 11 homolog, mitochondrial	G4LTX1	G4LTX1	Dorsal (1)	NaN	0.26663
4050	e(y)3	Supporter of activation of yellow protein	M9PHL0	M9PHL0	Dorsal (1)	NaN	0.376533
4197	Orc1	Origin recognition complex subunit 1	O16810	O16810	Dorsal (1)	NaN	0.277518
5016	lin19	Cullin homolog 1	Q24311	Q24311	Dorsal (1)	NaN	0.619099
5044	Cp190	Centrosome-associated zinc finger protein CP190	Q24478	Q24478	Dorsal (1)	0.168632	0.183884
5485			Q7K1V0	Q7K1V0	Dorsal (1)	0.339104	0.414188
5642	wde		Q7KMH9	Q7KMH9	Dorsal (1)	0.243408	0.307101
5808	Atg17		Q7KTS2	Q7KTS2	Dorsal (1)	0.471198	0.524478
6929	abs	ATP-dependent RNA helicase abstrakt	Q9V3C0	Q9V3C0	Dorsal (1)	-0.0183114	0.00600619
6995	REG		Q9V3P3	Q9V3P3	Dorsal (1)	0.250693	0.387435
7158	scra	Actin-binding protein anillin	Q9V4P1	Q9V4P1	Dorsal (1)	0.352983	0.468476
7713	CG5382	Zinc finger protein-like 1 homolog	Q9VD26	Q9VD26	Dorsal (1)	NaN	0.323289
8513	eEF1delta	Probable elongation factor 1-delta	Q9VL18	Q9VL18	Dorsal (1)	0.214638	0.341039
8702	lost		Q9VN21	Q9VN21	Dorsal (1)	0.1007	0.166499
9150			Q9VRV1	Q9VRV1	Dorsal (1)	0.530641	0.551269
9499	CTPsyn	CTP synthase	X2JCY2	X2JCY2	Dorsal (1)	0.0189466	0.0410706
9572	spd-2		Q9VV79	Q9VV79	Dorsal (1)	NaN	0.20334
10267	MED14	Mediator of RNA polymerase II transcription subunit 14	Q9W0P8	Q9W0P8	Dorsal (1)	0.0396201	0.179383
10897	Slmap		Q9W5R5	Q9W5R5	Dorsal (1)	0.371515	0.393106
11049	sip1	Septin-interacting protein 1	X2J8R0	X2J8R0	Dorsal (1)	0.0655393	0.201371
11447	hrg		Q9N6D7	Q9N6D7	Dorsal (1)	-0.0697448	0.0151568
11449	hrg		Q9N6D7	Q9N6D7	Dorsal (1)	0.00696218	0.0879318
12098	Df31		O16043	O16043	Dorsal (1)	NaN	0.274301
12104	Orc1	Origin recognition complex subunit 1	O16810	O16810	Dorsal (1)	0.128016	0.166477
12189	DNApol-alpha180	DNA polymerase alpha catalytic subunit	P26019	P26019	Dorsal (1)	NaN	0.265125
13309			Q9VZ60	Q9VZ60	Dorsal (1)	0.15585	0.217831
13249	CG32549-RF		Q9VWV2	Q9VWV2	Dorsal (1)	-0.400534	-0.363706
13158	SRm160		Q9VU43	Q9VU43	Dorsal (1)	0.331949	0.337185
13464	Rif1		Q9XZ34	Q9XZ34	Dorsal (1)	-0.2994	-0.320082
13347	DCP1		Q9W1H5	Q9W1H5	Dorsal (1)	-0.484691	-0.457675
13078			Q9VPR5	Q9VPR5	Dorsal (1)	-0.230552	-0.166179
13028	lost		Q9VN21	Q9VN21	Dorsal (1)	0.51269	0.550783
13025	lost		Q9VN21	Q9VN21	Dorsal (1)	0.239955	0.256864
13004	slam		Q9VME5	Q9VME5	Dorsal (1)	-0.352331	-0.445615
12889			Q9VHC8	Q9VHC8	Dorsal (1)	0.305621	0.276347
12834	Dys	Dystrophin, isoforms A/C/F/G/H	Q9VDW6	Q9VDW6	Dorsal (1)	0.244785	NaN
12718	CG8858	Proteasome-associated protein ECM29 homolog	Q9V677	Q9V677	Dorsal (1)	0.193932	0.186368
12685	Nab2		Q9V3H9	Q9V3H9	Dorsal (1)	-0.553496	-0.513201
12495	Akap200		Q9VLL3;Q8IPF5	Q9VLL3	Dorsal (1)	-0.532169	-0.513447
12406	Pi3K68D		Q7K3H0	Q7K3H0	Dorsal (1)	-0.425791	-0.42737
12222	Klp61F	Bipolar kinesin KRP-130	P46863	P46863	Dorsal (1)	-0.381729	-0.316681
12109	Orc1	Origin recognition complex subunit 1	O16810	O16810	Dorsal (1)	0.176013	0.207861
12069	e(y)3	Supporter of activation of yellow protein	M9PHL0	M9PHL0	Dorsal (1)	0.634287	0.675599
11919	Mbs		M9NDA1	M9NDA1	Dorsal (1)	0.177245	0.112372
11911	spen	Protein split ends	M9NCM6	M9NCM6	Dorsal (1)	0.253147	0.289182
11776	BcDNA:LD21969		Q9VI18	Q9VI18	Dorsal (1)	-0.28774	-0.241953
11765			B7Z0I8	B7Z0I8	Dorsal (1)	0.164184	0.214882
11701			B5RJJ4	B5RJJ4	Dorsal (1)	-0.145861	-0.133286
11669	hts	Protein hu-li tai shao	A8DYJ2	A8DYJ2	Dorsal (1)	0.381836	0.381886
11604	NAT1		A1Z968	A1Z968	Dorsal (1)	-0.452162	-0.389083
11541	Ca-P60A	Calcium-transporting ATPase;Calcium-transporting ATPase sarcoplasmic/endoplasmic reticulum type	A0A0B4LGB7	A0A0B4LGB7	Dorsal (1)	0.32019	0.313185
11521	Sec31		A1Z7J7	A1Z7J7	Dorsal (1)	-0.400443	-0.347606
11461			Q9VC89	Q9VC89	Dorsal (1)	-0.310627	-0.285184
11383	14-3-3zeta	14-3-3 protein zeta	A0A0B4KEH0	A0A0B4KEH0	Dorsal (1)	-0.376559	-0.345017
11368	larp	La-related protein 1	A0A0B4K7Y7	A0A0B4K7Y7	Dorsal (1)	-0.406683	-0.34053
11257	CG33090	Non-lysosomal glucosylceramidase	X2JE45	X2JE45	Dorsal (1)	0.192137	0.196776
11124	Apc2		Q9Y1T2	Q9Y1T2	Dorsal (1)	0.303626	0.264424
11098	BcDNA.GH04978		Q9Y145	Q9Y145	Dorsal (1)	-0.331772	-0.300663
11095	BcDNA.GH04978		Q9Y145	Q9Y145	Dorsal (1)	-0.34851	-0.342357
11012	Rif1		Q9XZ34	Q9XZ34	Dorsal (1)	-0.336482	-0.303047
11002	Klp3A	Kinesin-like protein	Q9XZ29	Q9XZ29	Dorsal (1)	-0.369381	-0.39642
10995			Q9XZ22	Q9XZ22	Dorsal (1)	-0.429621	-0.429951
10993			Q9XZ22	Q9XZ22	Dorsal (1)	-0.392065	-0.410214
10977	snama		Q9XZ21	Q9XZ21	Dorsal (1)	-0.336467	-0.275419
10976	snama		Q9XZ21	Q9XZ21	Dorsal (1)	-0.318637	-0.265426
10960	snama		Q9XZ21	Q9XZ21	Dorsal (1)	-0.406897	-0.413294
10957	snama		Q9XZ21	Q9XZ21	Dorsal (1)	NaN	-0.853291
10808	tyf		Q9W4M7	Q9W4M7	Dorsal (1)	-0.378727	-0.376515
10774	Usp16-45	Ubiquitin carboxyl-terminal hydrolase	Q9W4C3	Q9W4C3	Dorsal (1)	-0.389828	-0.405767
10766	IntS6		Q9W485	Q9W485	Dorsal (1)	-0.299734	-0.35944
10703			Q9W3Y3	Q9W3Y3	Dorsal (1)	0.256102	0.320534
10700	CG3224	Zinc finger protein 593 homolog	Q9W3Y0	Q9W3Y0	Dorsal (1)	0.27429	0.274329
10625	CG17982-RA		Q9W3J6	Q9W3J6	Dorsal (1)	0.222505	0.267594
10592	Caf1-180		Q9W3D1	Q9W3D1	Dorsal (1)	0.278088	0.331761
10556	mxc		Q9W363	Q9W363	Dorsal (1)	NaN	-0.58618
10542	Larp7		Q9W362	Q9W362	Dorsal (1)	-0.503968	-0.307006
10522	ATPsyndelta		Q9W2X6	Q9W2X6	Dorsal (1)	-0.566453	-0.553883
10503	nocte		Q9W2U7	Q9W2U7	Dorsal (1)	0.227225	0.292857
10502	nocte		Q9W2U7	Q9W2U7	Dorsal (1)	0.114779	0.148681
10451	Rbpn-5		Q9W2M0	Q9W2M0	Dorsal (1)	0.312959	0.363072
10447	Rbpn-5		Q9W2M0	Q9W2M0	Dorsal (1)	0.27886	0.311584
10354	DCP1		Q9W1H5	Q9W1H5	Dorsal (1)	-0.452358	-0.414933
10351	DCP1		Q9W1H5	Q9W1H5	Dorsal (1)	-0.21754	NaN
10348	DNA-ligI	DNA ligase 1	Q9W1H4	Q9W1H4	Dorsal (1)	-0.541534	-0.491955
10211			Q9W019	Q9W019	Dorsal (1)	-0.342004	-0.369891
10154			Q9VZ60	Q9VZ60	Dorsal (1)	0.15585	0.217831
10106	HP5		Q9VYY7	Q9VYY7	Dorsal (1)	-0.679602	-0.662339
10105	HP5		Q9VYY7	Q9VYY7	Dorsal (1)	-0.679602	-0.648864
10066	Amun		Q9VYV4	Q9VYV4	Dorsal (1)	-0.380761	-0.361656
10040	Usp7	Ubiquitin carboxyl-terminal hydrolase;Ubiquitin carboxyl-terminal hydrolase 7	X2JEX7	X2JEX7	Dorsal (1)	-0.288902	-0.245979
9998			Q9VYA4	Q9VYA4	Dorsal (1)	-0.435141	-0.355524
9972	Pdcd4		Q9VY91	Q9VY91	Dorsal (1)	-0.395581	-0.306931
9964	l(1)G0007		Q9VY54	Q9VY54	Dorsal (1)	0.154856	0.185504
9935	mh		Q9VXU6	Q9VXU6	Dorsal (1)	0.0422385	0.0424973
9925			X2JF83	X2JF83	Dorsal (1)	0.335934	0.337397
9892	hang	Zinc finger protein hangover	Q9VXG1	Q9VXG1	Dorsal (1)	-0.374966	-0.34881
9855			X2JFW6	X2JFW6	Dorsal (1)	-0.312826	-0.32005
9810	Rip11		X2JFP6	X2JFP6	Dorsal (1)	-0.404929	-0.395931
9709			Q9VWD7	Q9VWD7	Dorsal (1)	-0.445885	-0.483655
9650			Q9VVW2	Q9VVW2	Dorsal (1)	-0.256246	NaN
9633	MED19	Mediator of RNA polymerase II transcription subunit 19	X2J969	X2J969	Dorsal (1)	-0.390567	-0.328599
9623			Q9VVG9	Q9VVG9	Dorsal (1)	0.340634	0.364224
9481	stwl		Q9VUE5	Q9VUE5	Dorsal (1)	-0.490183	-0.460145
9320			Q9VTK7	Q9VTK7	Dorsal (1)	-0.333954	-0.370431
9259			Q9VT61	Q9VT61	Dorsal (1)	0.226324	0.246333
9178	eco	N-acetyltransferase eco	Q9VS50	Q9VS50	Dorsal (1)	-0.30673	-0.323222
9166	RhoGEF4		Q9VS45	Q9VS45	Dorsal (1)	0.446196	0.482912
9140	scny	Ubiquitin carboxyl-terminal hydrolase 36	Q9VRP5	Q9VRP5	Dorsal (1)	-0.429045	-0.365938
9084	Elba3		Q9VR19	Q9VR19	Dorsal (1)	0.12386	0.146239
9077	Bsg25A		Q9VR17	Q9VR17	Dorsal (1)	-0.471224	-0.536845
9068			Q9VQZ8	Q9VQZ8	Dorsal (1)	-0.702862	-0.646477
9042			Q9VQK5	Q9VQK5	Dorsal (1)	0.719644	0.704083
8996			Q9VQ78	Q9VQ78	Dorsal (1)	-0.247709	-0.275959
8991	CG15356-RA		Q9VQ58	Q9VQ58	Dorsal (1)	-0.51567	-0.534266
8955			Q9VPR5	Q9VPR5	Dorsal (1)	-0.632143	-0.501184
8866	MED1	Mediator of RNA polymerase II transcription subunit 1	Q9VP05	Q9VP05	Dorsal (1)	-0.480109	-0.438716
8843			Q9VNW1	Q9VNW1	Dorsal (1)	0.326925	0.267527
8822	sec8	Exocyst complex component 4	Q9VNH6	Q9VNH6	Dorsal (1)	0.240265	0.248873
8735	cno		Q9VN82	Q9VN82	Dorsal (1)	0.312264	0.311464
8726	cno		Q9VN82	Q9VN82	Dorsal (1)	-0.385352	-0.382162
8685	CG6907	Putative elongator complex protein 4	X2J4N6	X2J4N6	Dorsal (1)	0.90184	0.894626
8566	borr	Borealin	Q9VLD6	Q9VLD6	Dorsal (1)	0.153418	0.156025
8488	Grip75	Gamma-tubulin complex component 4 homolog	Q9VKU7	Q9VKU7	Dorsal (1)	0.325143	0.348685
8315	Grip71		Q9VJ57	Q9VJ57	Dorsal (1)	-0.387823	-0.409142
8307	ssp3		X2J6U8	X2J6U8	Dorsal (1)	-0.438731	-0.374185
8231	Cen		Q9VIK6	Q9VIK6	Dorsal (1)	-0.305407	-0.323772
8139	Atg13	Autophagy-related protein 13 homolog	Q9VHR6	Q9VHR6	Dorsal (1)	0.421491	0.384678
8118	Tcp-1eta		Q9VHL2	Q9VHL2	Dorsal (1)	-0.246945	-0.428741
8083			Q9VHC8	Q9VHC8	Dorsal (1)	-0.302213	NaN
8047			Q9VH82	Q9VH82	Dorsal (1)	0.338493	0.337697
7997	Blm	Bloom syndrome protein homolog	Q9VGI8	Q9VGI8	Dorsal (1)	-0.272044	-0.269822
7992	Blm	Bloom syndrome protein homolog	Q9VGI8	Q9VGI8	Dorsal (1)	-0.339512	-0.340731
7982	Lk6		Q9VGI5	Q9VGI5	Dorsal (1)	-0.195114	-0.139667
7958	trus		Q9VG62	Q9VG62	Dorsal (1)	0.492655	0.510915
7895	mor		Q9VF03	Q9VF03	Dorsal (1)	-0.471974	-0.407763
7890	mor		Q9VF03	Q9VF03	Dorsal (1)	0.314975	0.232882
7884	mor		Q9VF03	Q9VF03	Dorsal (1)	0.272704	0.30978
7873			Q9VEV3	Q9VEV3	Dorsal (1)	0.697533	0.676447
7795	Dys	Dystrophin, isoforms A/C/F/G/H;Dystrophin, isoform B;Dystrophin, isoform D;Dystrophin, isoform E	Q9VDW6	Q9VDW6	Dorsal (1)	0.26107	0.319174
7792	Dys	Dystrophin, isoforms A/C/F/G/H	Q9VDW6	Q9VDW6	Dorsal (1)	0.325089	NaN
7787	trem		Q9VDQ4	Q9VDQ4	Dorsal (1)	NaN	-0.0225364
7762	Rlip	RalA-binding protein 1	Q9VDG2	Q9VDG2	Dorsal (1)	-0.270157	-0.250024
7750	ppan	Protein Peter pan	Q9VDE5	Q9VDE5	Dorsal (1)	-0.610409	-0.553257
7676	EloA	Transcription elongation factor B polypeptide 3	Q9VCP0	Q9VCP0	Dorsal (1)	0.234596	0.305374
7620	CHORD	Cysteine and histidine-rich domain-containing protein	Q9VCC0	Q9VCC0	Dorsal (1)	-0.352391	-0.33506
7551			Q9VC60	Q9VC60	Dorsal (1)	-0.43928	-0.495061
7472	Mink		Q9VC08	Q9VC08	Dorsal (1)	0.385094	0.344266
7357	pins		Q9VB22	Q9VB22	Dorsal (1)	-0.526421	-0.490129
7348	CG5003-RA		Q9VAZ0	Q9VAZ0	Dorsal (1)	-0.325889	-0.292038
7347	CG5003-RA		Q9VAZ0	Q9VAZ0	Dorsal (1)	-0.751314	-0.707383
7334	Moca-cyp		Q9VAW1	Q9VAW1	Dorsal (1)	-0.372735	-0.420346
7175	RpL31	60S ribosomal protein L31	Q9V597	Q9V597	Dorsal (1)	-0.603147	-0.59172
7145	bip2		Q9V4D4	Q9V4D4	Dorsal (1)	-0.454323	-0.448286
7112	CG9776	Zinc finger matrin-type protein CG9776	Q9V468	Q9V468	Dorsal (1)	-0.474518	-0.458426
7111	CG9776	Zinc finger matrin-type protein CG9776	Q9V468	Q9V468	Dorsal (1)	-0.536592	-0.42967
7078	vig		Q9V426	Q9V426	Dorsal (1)	0.225981	0.255262
7025	Rpt5		Q9V3V6	Q9V3V6	Dorsal (1)	-0.176034	-0.150794
7005	x16		Q9V3V0	Q9V3V0	Dorsal (1)	0.108834	0.123436
7004	x16		Q9V3V0	Q9V3V0	Dorsal (1)	-0.198366	-0.163346
6986	Nab2		Q9V3H9	Q9V3H9	Dorsal (1)	0.53988	0.547529
6977	Nab2		Q9V3H9	Q9V3H9	Dorsal (1)	0.28611	0.306726
6976	Nab2		Q9V3H9	Q9V3H9	Dorsal (1)	0.147906	0.168522
6973	Nab2		Q9V3H9	Q9V3H9	Dorsal (1)	-0.556813	-0.567375
6972	Nab2		Q9V3H9	Q9V3H9	Dorsal (1)	-0.602183	-0.548443
6883	chb	CLIP-associating protein	Q9NBD7	Q9NBD7	Dorsal (1)	-0.301402	-0.260168
6881	chb	CLIP-associating protein	Q9NBD7	Q9NBD7	Dorsal (1)	-0.401949	-0.36943
6861	Jupiter	Microtubule-associated protein Jupiter	Q9I7K0	Q9I7K0	Dorsal (1)	-0.41846	-0.336636
6830	XNP	Transcriptional regulator ATRX homolog	Q9GQN5	Q9GQN5	Dorsal (1)	0.445714	0.447528
6797	Hrs	Hepatocyte growth factor-regulated tyrosine kinase substrate	Q960X8	Q960X8	Dorsal (1)	-0.493419	-0.457383
6791	Sap47	Synapse-associated protein of 47 kDa	Q960T2	Q960T2	Dorsal (1)	0.268954	0.261387
6768	vig2		Q960D3	Q960D3	Dorsal (1)	0.410707	0.382707
6713	Dref		Q94883	Q94883	Dorsal (1)	-0.518086	-0.469384
6596	Uba1		Q8T0L3	Q8T0L3	Dorsal (1)	-0.442443	-0.41819
6553	Yeti		Q8SXI2	Q8SXI2	Dorsal (1)	-0.148551	-0.163949
6516	Atx2	Ataxin-2 homolog	Q8SWR8	Q8SWR8	Dorsal (1)	-0.313063	-0.288421
6473	BigH1		Q8MSC4	Q8MSC4	Dorsal (1)	0.217004	0.277796
6424	Eps-15;Eps-15-RB		Q8MMD2	Q8MMD2	Dorsal (1)	-0.324689	-0.266855
6364	CG32251	Claspin homolog	Q8IRB5	Q8IRB5	Dorsal (1)	-0.808989	-0.582885
6361	CG32251	Claspin homolog	Q8IRB5	Q8IRB5	Dorsal (1)	-0.680288	-0.578831
6293			Q8T0E7	Q8T0E7	Dorsal (1)	-0.457326	-0.399397
6204	sle;CG12592	Protein slender lobes;Slender lobes-like protein	Q8INM3	Q8INM3	Dorsal (1)	0.177391	0.201871
6185	sle	Protein slender lobes	Q8INM3	Q8INM3	Dorsal (1)	0.294944	0.326187
6183	sle;CG12592	Protein slender lobes;Slender lobes-like protein	Q8INM3	Q8INM3	Dorsal (1)	-0.339724	-0.30452
6178	sle	Protein slender lobes	Q8INM3	Q8INM3	Dorsal (1)	-0.447026	-0.504911
6155	sle	Protein slender lobes	Q8INM3	Q8INM3	Dorsal (1)	-0.490509	-0.444484
6120	Hexim		Q9VFH2	Q9VFH2	Dorsal (1)	0.0858653	0.122161
6043	Chro		Q86BS3	Q86BS3	Dorsal (1)	-0.335138	-0.313578
6030	elg1		Q86BP6	Q86BP6	Dorsal (1)	-0.347155	-0.307795
6019	Akap200		Q9VLL3;Q8IPF5	Q9VLL3	Dorsal (1)	-0.315134	-0.309804
6005	CG8611	Probable ATP-dependent RNA helicase CG8611	X2JKW3	X2JKW3	Dorsal (1)	-0.467315	-0.39064
5941	Skp2		Q7YZ95	Q7YZ95	Dorsal (1)	-0.454771	NaN
5887	Vap-33A		Q7KVX5	Q7KVX5	Dorsal (1)	-0.249604	-0.220518
5858	iPLA2-VIA		Q9VT60	Q9VT60	Dorsal (1)	0.2455	0.231788
5857	iPLA2-VIA		Q9VT60	Q9VT60	Dorsal (1)	0.235068	0.241837
5849	Uba2		Q7KUA4	Q7KUA4	Dorsal (1)	0.317106	0.327423
5812	Nopp140		Q7KTV5	Q7KTV5	Dorsal (1)	0.293741	0.275822
5806	Atg17		Q7KTS2	Q7KTS2	Dorsal (1)	-0.428411	-0.395921
5750	fray		Q7KSD3	Q7KSD3	Dorsal (1)	0.321677	0.345052
5749	fray		Q7KSD3	Q7KSD3	Dorsal (1)	0.279072	0.310655
5748	fray		Q7KSD3	Q7KSD3	Dorsal (1)	-0.545415	-0.525642
5737	btz		Q9VB04	Q9VB04	Dorsal (1)	0.133498	0.0407789
5723	CG1646	Pre-mRNA-processing factor 39	Q7KRW8	Q7KRW8	Dorsal (1)	-0.372021	-0.378566
5718			Q8IMG3	Q8IMG3	Dorsal (1)	0.227778	0.228201
5640	wde		Q7KMH9	Q7KMH9	Dorsal (1)	0.29895	0.332816
5600	CG5544		Q7K556	Q7K556	Dorsal (1)	-0.32857	-0.370366
5599	CG5544		Q7K556	Q7K556	Dorsal (1)	-0.200109	-0.215652
5582			Q7K4L8	Q7K4L8	Dorsal (1)	-0.385277	-0.367143
5441	FLASH		Q7K0L8	Q7K0L8	Dorsal (1)	-0.470914	-0.537691
5413	ClC-b	Chloride channel protein	Q7JZ25	Q7JZ25	Dorsal (1)	-0.288968	-0.310164
5396	Roc2		Q7JWH5	Q7JWH5	Dorsal (1)	0.219457	0.22726
5391	Usp20-33	Ubiquitin carboxyl-terminal hydrolase	Q7JW61	Q7JW61	Dorsal (1)	-0.342674	NaN
5317	Rs1		Q7JQN4	Q7JQN4	Dorsal (1)	-0.173959	-0.143517
5316	Rs1		Q7JQN4	Q7JQN4	Dorsal (1)	-0.173959	-0.143517
5315	Rs1		Q7JQN4	Q7JQN4	Dorsal (1)	-0.173959	-0.143517
5291			Q7JQU9	Q7JQU9	Dorsal (1)	-0.338575	-0.331547
5244			Q5BI31	Q5BI31	Dorsal (1)	0.274953	0.333787
5243			Q5BI31	Q5BI31	Dorsal (1)	0.274953	0.333787
5194			Q4QQ01	Q4QQ01	Dorsal (1)	0.287105	0.276886
5193			Q4QQ01	Q4QQ01	Dorsal (1)	0.197095	0.143614
5060	Cp190	Centrosome-associated zinc finger protein CP190	Q24478	Q24478	Dorsal (1)	-0.367171	-0.32689
5043	Cp190	Centrosome-associated zinc finger protein CP190	Q24478	Q24478	Dorsal (1)	0.337341	0.406872
5042	Cp190	Centrosome-associated zinc finger protein CP190	Q24478	Q24478	Dorsal (1)	0.402442	0.435978
4994	RpL29	60S ribosomal protein L29	Q24154	Q24154	Dorsal (1)	NaN	-0.380032
4991	DnaJ-1	DnaJ protein homolog 1	Q53ZT0	Q53ZT0	Dorsal (1)	0.158285	0.167696
4912	MEP-1		Q0E8J0	Q0E8J0	Dorsal (1)	-0.340404	-0.312187
4843	ndl	Serine protease nudel	P98159	P98159	Dorsal (1)	-0.421397	-0.385763
4842	ndl	Serine protease nudel	P98159	P98159	Dorsal (1)	-0.420405	-0.38945
4829	Letm1	LETM1 and EF-hand domain-containing protein anon-60Da, mitochondrial	P91927	P91927	Dorsal (1)	-0.513304	-0.517391
4816	Haspin	Putative serine/threonine-protein kinase haspin homolog	P83103	P83103	Dorsal (1)	-0.545805	-0.516356
4741	RnrS	Ribonucleoside-diphosphate reductase subunit M2	P48592	P48592	Dorsal (1)	0.360448	0.365817
4739	RnrS	Ribonucleoside-diphosphate reductase subunit M2	P48592	P48592	Dorsal (1)	-0.457604	-0.381838
4738	RnrL	Ribonucleoside-diphosphate reductase large subunit	P48591	P48591	Dorsal (1)	0.321638	0.350946
4714	lola	'Longitudinals lacking protein, isoform G;Longitudinals lacking protein, isoforms H/M/V;Longitudinals lacking protein, isoforms A...' <Preview truncated at 128 characters>	P42283	P42283	Dorsal (1)	-0.692769	-0.54597
4697	La	La protein homolog	P40796	P40796	Dorsal (1)	-0.432661	-0.433757
4685	opa	Pair-rule protein odd-paired	P39768	P39768	Dorsal (1)	-0.519162	-0.420965
4679	Gnf1	Replication factor C subunit 1	P35600	P35600	Dorsal (1)	-0.336191	-0.306021
4678	Gnf1	Replication factor C subunit 1	P35600	P35600	Dorsal (1)	-0.270094	-0.244244
4614	bnb	Protein bangles and beads	P29746	P29746	Dorsal (1)	0.250854	0.251209
4585	tud	Maternal protein tudor	P25823	P25823	Dorsal (1)	NaN	-0.516631
4532	CycB	G2/mitotic-specific cyclin-B	P20439	P20439	Dorsal (1)	0.129957	0.131927
4481	Gl	Dynactin subunit 1	P13496	P13496	Dorsal (1)	-0.572187	-0.54825
4424	alphaTub84D;alphaTub84B	Tubulin alpha-3 chain;Tubulin alpha-1 chain	P06605	P06605	Dorsal (1)	0.314747	0.282255
4408	hb	Protein hunchback	P05084	P05084	Dorsal (1)	-0.392485	-0.407226
4274	pen	Protein penguin	O61345	O61345	Dorsal (1)	-0.465564	-0.417223
4238	east		Q7KW02	Q7KW02	Dorsal (1)	0.204632	0.204677
4196	Orc1	Origin recognition complex subunit 1	O16810	O16810	Dorsal (1)	0.222904	0.236999
4151	Spt6	Transcription elongation factor SPT6	N0D8I3	N0D8I3	Dorsal (1)	-0.255975	-0.25589
4112	Spc105R		Q9VPB2	Q9VPB2	Dorsal (1)	-0.401647	-0.528021
4082	sti		Q9VTY8	Q9VTY8	Dorsal (1)	-0.366462	-0.323175
3976	klar		Q7YU15	Q7YU15	Dorsal (1)	-0.28234	-0.29287
3860	Nopp140		M9PFZ1;Q7KTV5	Q7KTV5	Dorsal (1)	0.424066	0.41912
3859	Nopp140		M9PFZ1;Q7KTV5	Q7KTV5	Dorsal (1)	-0.685484	NaN
3821	brm	ATP-dependent helicase brm	M9PFM5	M9PFM5	Dorsal (1)	0.235292	0.215577
3806	Klc	Kinesin light chain	M9PF24	M9PF24	Dorsal (1)	0.553746	0.550625
3745	Girdin		Q8SX64	Q8SX64	Dorsal (1)	-0.644861	-0.653222
3717	cact	NF-kappa-B inhibitor cactus	M9PD95	M9PD95	Dorsal (1)	0.314334	0.334909
3642	Vps60;CG6259	Charged multivesicular body protein 5	M9PCV9	M9PCV9	Dorsal (1)	-0.222928	-0.21106
3640	chico	Insulin receptor substrate 1	M9PCQ8	M9PCQ8	Dorsal (1)	0.184473	0.20777
3634	numb	Protein numb	M9PCN6	M9PCN6	Dorsal (1)	0.227644	0.243468
3540	CG12084	Protein zer-1 homolog	M9PBH9	M9PBH9	Dorsal (1)	-0.477174	-0.450928
3490	Wee1;wee	Wee1-like protein kinase	M9PB57	M9PB57	Dorsal (1)	-0.337142	-0.335557
3337	Lam	Lamin Dm0	M9NE89	M9NE89	Dorsal (1)	-0.432941	-0.400884
3275	Reps		M9NDL7	M9NDL7	Dorsal (1)	0.614025	0.610652
3247	eIF5B		M9ND37	M9ND37	Dorsal (1)	-0.47383	-0.37928
3225	l(2)gl	Lethal(2) giant larvae protein	M9NCX1	M9NCX1	Dorsal (1)	0.291011	0.282531
3117	Nrt	Neurotactin	M9MS15	M9MS15	Dorsal (1)	-0.567688	-0.480299
3012	CaMKII	Calcium/calmodulin-dependent protein kinase type II alpha chain	L0MLP2	L0MLP2	Dorsal (1)	-0.581883	-0.637734
3003	Pp2A-29B	Serine/threonine-protein phosphatase PP2A 65 kDa regulatory subunit	M9MQH9	M9MQH9	Dorsal (1)	0.17848	0.174674
2915	ens		Q8IRC1	Q8IRC1	Dorsal (1)	0.164279	0.136137
2893	Capr	Caprin homolog	E4NKG1	E4NKG1	Dorsal (1)	-0.505928	-0.430835
2878	CG2982	Bifunctional lysine-specific demethylase and histidyl-hydroxylase NO66	E2QD64	E2QD64	Dorsal (1)	NaN	-0.293168
2610	Klp31E	Kinesin-like protein	E1JHE1	E1JHE1	Dorsal (1)	-0.43765	-0.412827
2604	Hrb27C	Heterogeneous nuclear ribonucleoprotein 27C	E1JHA4	E1JHA4	Dorsal (1)	-0.310002	-0.314626
2603	Hrb27C	Heterogeneous nuclear ribonucleoprotein 27C	E1JHA4	E1JHA4	Dorsal (1)	-0.20846	-0.190256
2570	ssh	Protein phosphatase Slingshot	D3PFH9	D3PFH9	Dorsal (1)	-0.29383	-0.331271
2514	CoRest	REST corepressor	C7LAG1;Q59E36	Q59E36	Dorsal (1)	0.416738	0.467971
2513	CoRest	REST corepressor	C7LAG1;Q59E36	Q59E36	Dorsal (1)	0.416738	0.463161
2498	Trp1		X2J9A4	X2J9A4	Dorsal (1)	-0.360012	-0.413634
2495	CrebB	Cyclic AMP response element-binding protein B	M9PHW9	M9PHW9	Dorsal (1)	-0.493369	-0.447686
2472			Q9VYL7	Q9VYL7	Dorsal (1)	0.295833	0.361447
2459	Taf7	Transcription initiation factor TFIID subunit 7	B7Z0V1	B7Z0V1	Dorsal (1)	-0.0803753	-0.0492474
2434			B7Z0I8	B7Z0I8	Dorsal (1)	-0.38696	-0.332321
2395			B7Z0I8	B7Z0I8	Dorsal (1)	0.244091	0.309412
2390			B7Z0I8	B7Z0I8	Dorsal (1)	0.283956	0.270992
2373			B7Z0I8	B7Z0I8	Dorsal (1)	0.368105	0.448015
2329	sowah		B7Z0B0	B7Z0B0	Dorsal (1)	-0.43648	-0.408094
2285	kis		B7Z002	B7Z002	Dorsal (1)	0.170799	0.191852
2244	kis		B7Z002	B7Z002	Dorsal (1)	-0.30346	-0.247702
2222	Rrp1	Recombination repair protein 1	B7YZZ9	B7YZZ9	Dorsal (1)	0.236582	0.199188
2184	slik		B7YZQ1	B7YZQ1	Dorsal (1)	0.235	0.244385
2160			B5RJJ4	B5RJJ4	Dorsal (1)	-0.589173	-0.641861
2135	pod1	Coronin	Q9W3W1	Q9W3W1	Dorsal (1)	0.0746245	0.147872
2050	I-2		Q9V3C7	Q9V3C7	Dorsal (1)	-0.405189	-0.347656
1882	D1	Chromosomal protein D1	A4V2K7	A4V2K7	Dorsal (1)	-0.572395	-0.536679
1875	D1	Chromosomal protein D1	A4V2K7	A4V2K7	Dorsal (1)	0.400823	0.391998
1808	CG16742	WASH complex subunit FAM21 homolog	A1ZBW7	A1ZBW7	Dorsal (1)	-0.355797	-0.374043
1777			A1ZBT6	A1ZBT6	Dorsal (1)	-0.198613	-0.162228
1776			A1ZBT6	A1ZBT6	Dorsal (1)	-0.198613	-0.162228
1721	CG30115-RD;GEFmeso		B3DN64	B3DN64	Dorsal (1)	-0.379991	-0.391751
1703	Tes		A1ZAT5	A1ZAT5	Dorsal (1)	-0.355556	-0.353287
1685	Psi		A1ZAK7	A1ZAK7	Dorsal (1)	-0.319965	-0.31672
1671	Dek		Q8IFW6	Q8IFW6	Dorsal (1)	-0.341495	-0.32822
1666	Dek		Q8IFW6	Q8IFW6	Dorsal (1)	-0.374792	-0.341122
1643	Su(var)2-HP2		A1Z9S6	A1Z9S6	Dorsal (1)	-0.458155	-0.426733
1594	NAT1		A1Z968	A1Z968	Dorsal (1)	-0.4638	-0.608519
1538			E1JH24	E1JH24	Dorsal (1)	-0.347958	-0.319875
1478	BubR1		A1Z6I7	A1Z6I7	Dorsal (1)	-0.782681	-0.746136
1442	CG4951	Uncharacterized protein CG4951	A1A708	A1A708	Dorsal (1)	-0.360218	-0.355744
1441	CG4951	Uncharacterized protein CG4951	A1A708	A1A708	Dorsal (1)	-0.332414	-0.327853
1389	FDY		A0A0S0X2W5	A0A0S0X2W5	Dorsal (1)	0.511373	0.546592
1321	Lnk		A0A0B4LIP5	A0A0B4LIP5	Dorsal (1)	0.167338	0.259764
1298	Vrp1		Q8SX98	Q8SX98	Dorsal (1)	0.313093	0.339536
1174	Incenp		A0A0B4LFQ2	A0A0B4LFQ2	Dorsal (1)	NaN	-0.381868
1169	Incenp		A0A0B4LFQ2	A0A0B4LFQ2	Dorsal (1)	-0.300377	-0.251076
1151	CG8370	Transmembrane protein 131 homolog	A0A0B4LFJ4	A0A0B4LFJ4	Dorsal (1)	-0.229014	-0.23756
1101	cg		A1Z9M4	A1Z9M4	Dorsal (1)	0.177759	0.21944
1072	dpa	DNA replication licensing factor MCM4	A0A0B4LEV2	A0A0B4LEV2	Dorsal (1)	0.280778	0.333556
1036	spn-F		Q9V9Y9	Q9V9Y9	Dorsal (1)	NaN	-0.315083
1017	woc		A0A0B4KHZ0	A0A0B4KHZ0	Dorsal (1)	0.0827459	0.0870126
994			A0A0B4KHY8	A0A0B4KHY8	Dorsal (1)	-0.522834	-0.548175
923	puf	Ubiquitin carboxyl-terminal hydrolase	A0A0B4LIK5	A0A0B4LIK5	Dorsal (1)	-0.301976	-0.31265
869			Q9VC89	Q9VC89	Dorsal (1)	-0.310627	-0.285184
858	jar-RG;jar	Myosin heavy chain 95F	H1UUJ8	H1UUJ8	Dorsal (1)	0.308093	0.347765
829			A0A0B4KH73	A0A0B4KH73	Dorsal (1)	-0.367667	-0.313844
740	CG3499-RC		Q9W1Y0	Q9W1Y0	Dorsal (1)	0.250145	0.280163
617	Vps28	Vacuolar protein sorting-associated protein 28 homolog	A0A0B4KF05	A0A0B4KF05	Dorsal (1)	-0.440751	-0.423833
517	Ars2	Serrate RNA effector molecule homolog	A0A0B4KEI5	A0A0B4KEI5	Dorsal (1)	0.596446	0.614249
515	CG1513-RA	Oxysterol-binding protein	E1JH23	E1JH23	Dorsal (1)	-0.19736	-0.189358
426	larp	La-related protein 1	A0A0B4K7Y7	A0A0B4K7Y7	Dorsal (1)	-0.312133	-0.39176
417	larp	La-related protein 1	A0A0B4K7Y7	A0A0B4K7Y7	Dorsal (1)	0.116745	0.127059
407	RhoGEF2		A0A0B4LFF8	A0A0B4LFF8	Dorsal (1)	-0.166845	-0.168106
367	CG5174-RA		A1ZB80;A1ZB83;A1ZB79	A1ZB80	Dorsal (1)	-0.312661	-0.281081
333	mask	Ankyrin repeat and KH domain-containing protein mask	A0A0B4KHR8	A0A0B4KHR8	Dorsal (1)	-0.416769	-0.400829
309	su(Hw)	Protein suppressor of hairy wing	A0A0B4K6W1	A0A0B4K6W1	Dorsal (1)	-0.331438	-0.262471
222	mod(mdg4)	Modifier of mdg4	A0A0B4K6B8	A0A0B4K6B8	Dorsal (1)	-0.145364	-0.149681
221	mod(mdg4)	Modifier of mdg4	A0A0B4K6B8	A0A0B4K6B8	Dorsal (1)	-0.337888	-0.386979
214	rpk		O46342	O46342	Dorsal (1)	2.61977	2.62194
136	Taf1	Transcription initiation factor TFIID subunit 1	E1JJ72	E1JJ72	Dorsal (1)	-0.538408	NaN
125	CG6621	Tetratricopeptide repeat protein 14 homolog	A0A0B4JDC3	A0A0B4JDC3	Dorsal (1)	-0.383364	-0.330288
116	Cp1	Cathepsin L;Cathepsin L heavy chain;Cathepsin L light chain	A0A0B4JD48	A0A0B4JD48	Dorsal (1)	-0.867714	-0.861955
115	CG3800	CCHC-type zinc finger protein CG3800	A0A0B4JD46	A0A0B4JD46	Dorsal (1)	-0.166823	-0.149704
111	Su(var)2-10		A0A0B4JD33	A0A0B4JD33	Dorsal (1)	-0.435878	-0.40452
105	CG18659-RA		C8VV76	C8VV76	Dorsal (1)	-0.655427	-0.585624
81	ctrip		A0A0B4LHQ4	A0A0B4LHQ4	Dorsal (1)	-0.425614	-0.386812
77	tacc		A0A0B4JCV4	A0A0B4JCV4	Dorsal (1)	-0.236759	-0.207644
64	tacc		A0A0B4JCV4	A0A0B4JCV4	Dorsal (1)	-0.488243	-0.415763
13488	BcDNA.GH04978		Q9Y145	Q9Y145	Dorsal (1)	-0.349836	-0.343678
34	Lpin		E5DK16	E5DK16	Dorsal (1)	-0.271382	-0.283468
371	mod	DNA-binding protein modulo	A0A0B4K7G4	A0A0B4K7G4	Lateral (2)	0.306221	0.24706
2357	Su(var)3-3	Possible lysine-specific histone demethylase 1	M9PFR5	M9PFR5	Lateral (2)	0.235088	0.0934432
6233	CG10336	Protein TIPIN homolog	Q8INX3	Q8INX3	Lateral (2)	0.466945	0.446574
6916	cmtr2	Cap-specific mRNA (nucleoside-2'-O-)-methyltransferase 2	Q9UAS6	Q9UAS6	Lateral (2)	0.297654	0.201999
6917	cmtr2	Cap-specific mRNA (nucleoside-2'-O-)-methyltransferase 2	Q9UAS6	Q9UAS6	Lateral (2)	0.153424	0.0481185
7197	wcd	U3 small nucleolar RNA-associated protein 18 homolog	Q9V7P1	Q9V7P1	Lateral (2)	0.23815	0.178337
7198	wcd	U3 small nucleolar RNA-associated protein 18 homolog	Q9V7P1	Q9V7P1	Lateral (2)	0.23815	0.178337
7474	Mink		Q9VC08	Q9VC08	Lateral (2)	0.190252	0.151983
8160			Q9VI53	Q9VI53	Lateral (2)	0.345605	NaN
9920	Tcp-1zeta		Q9VXQ5	Q9VXQ5	Lateral (2)	0.157841	0.114355
9922			X2JF83	X2JF83	Lateral (2)	0.105488	0.0535182
10194			Q9VZS7	Q9VZS7	Lateral (2)	0.189654	0.08869
10659	CG1677-RA		X2JE07	X2JE07	Lateral (2)	0.268025	0.250248
12271	mei-218		Q0KHR4	Q0KHR4	Lateral (2)	0.207254	NaN
12955	Elf		Q9VK85	Q9VK85	Lateral (2)	0.14879	0.115978
4278	Nmt	Glycylpeptide N-tetradecanoyltransferase	O61613	O61613	Lateral (2)	0.183833	0.114869
3613	Rack1	Guanine nucleotide-binding protein subunit beta-like protein	M9PCC1	M9PCC1	Lateral (2)	0.241156	0.150271
3851	CG6479-RA		M9PFY2	M9PFY2	Lateral (2)	-0.270688	-0.25874
6071	SNF4Agamma		Q8I0A1;Q8SXT8;Q9VDD2	Q9VDD2	Lateral (2)	0.279358	0.29248
6058	rig	Protein rigor mortis	Q86BY9	Q86BY9	Lateral (2)	-0.536963	-0.493056
5959			Q7YZ99	Q7YZ99	Lateral (2)	0.472932	0.492787
5947			Q7YZ99	Q7YZ99	Lateral (2)	0.339649	0.309269
5946			Q7YZ99	Q7YZ99	Lateral (2)	0.402722	0.340458
5879	spoon		Q9W4C4	Q9W4C4	Lateral (2)	-0.400585	-0.386091
5867			Q7KV99	Q7KV99	Lateral (2)	0.213112	0.296118
5816	PNUTS		Q7KU01	Q7KU01	Lateral (2)	0.177637	0.263939
5681	TER94	Transitional endoplasmic reticulum ATPase TER94	Q7KN62	Q7KN62	Lateral (2)	0.313053	0.297808
5533			Q7K3D4	Q7K3D4	Lateral (2)	0.220786	0.245686
5429	Nup50		Q7K0D8	Q7K0D8	Lateral (2)	0.132864	0.152346
5401	Mtl		Q7JWS8	Q7JWS8	Lateral (2)	0.101503	0.10573
4105			M9PIC3	M9PIC3	Lateral (2)	0.215958	0.226077
5257	Set1	Histone-lysine N-methyltransferase SETD1	Q5LJZ2	Q5LJZ2	Lateral (2)	0.240151	0.239213
5245			Q5BI31	Q5BI31	Lateral (2)	0.282502	0.355143
5210			Q4V3Z5	Q4V3Z5	Lateral (2)	0.242613	0.27575
5104	Ubp64E	Ubiquitin carboxyl-terminal hydrolase 64E	Q24574	Q24574	Lateral (2)	-0.490704	-0.591547
5062	Cp190	Centrosome-associated zinc finger protein CP190	Q24478	Q24478	Lateral (2)	0.326931	0.36186
5048	Cp190	Centrosome-associated zinc finger protein CP190	Q24478	Q24478	Lateral (2)	0.168388	0.165864
5031	l(2)dtl	Protein lethal(2)denticleless	Q24371	Q24371	Lateral (2)	-0.492712	-0.418913
4981	Irbp	ATP-dependent DNA helicase 2 subunit 1	Q23976	Q23976	Lateral (2)	0.186886	0.231767
4926	eIF2B-delta		Q0E8X6	Q0E8X6	Lateral (2)	0.317932	0.289777
4917	mri		X2J8G3	X2J8G3	Lateral (2)	0.130974	0.155781
4913	MEP-1		Q0E8J0	Q0E8J0	Lateral (2)	-0.375476	-0.308295
4849	r-l	Uridine 5'-monophosphate synthase;Orotate phosphoribosyltransferase;Orotidine 5'-phosphate decarboxylase	Q01637	Q01637	Lateral (2)	0.322355	0.336289
4178	Df31		O16043	O16043	Lateral (2)	-0.410176	-0.376664
4607	RpS6	40S ribosomal protein S6	P29327	P29327	Lateral (2)	0.416378	0.418643
4604	Aats-glupro	Bifunctional glutamate/proline--tRNA ligase;Glutamate--tRNA ligase;Proline--tRNA ligase	P28668	P28668	Lateral (2)	0.243292	0.227256
4586	tud	Maternal protein tudor	P25823	P25823	Lateral (2)	0.145998	0.0926947
4573	fs(1)Ya	Mitosis initiation protein fs(1)Ya	P25028	P25028	Lateral (2)	0.177381	0.194883
4572	fs(1)Ya	Mitosis initiation protein fs(1)Ya	P25028	P25028	Lateral (2)	0.177381	0.194883
4563	Map205	205 kDa microtubule-associated protein	Q8IMF5	Q8IMF5	Lateral (2)	0.3324	0.379539
4560	me31B	Putative ATP-dependent RNA helicase me31b	P23128	P23128	Lateral (2)	-0.409857	-0.461011
4199	Orc1	Origin recognition complex subunit 1	O16810	O16810	Lateral (2)	0.24755	0.196709
4497	Top2	DNA topoisomerase 2	P15348	P15348	Lateral (2)	0.39633	0.366625
4449	RpL4	60S ribosomal protein L4	P09180	P09180	Lateral (2)	0.253106	0.201559
4331	ade3	'Trifunctional purine biosynthetic protein adenosine-3;Phosphoribosylamine--glycine ligase;Phosphoribosylformylglycinamidine cycl...' <Preview truncated at 128 characters>	X2J516	X2J516	Lateral (2)	0.382254	0.389859
4325	Axs	Anoctamin	O97132	O97132	Lateral (2)	0.427574	0.426413
4320	fab1	Putative 1-phosphatidylinositol 3-phosphate 5-kinase	O96838	O96838	Lateral (2)	0.094433	0.121745
4301	pck		Q2PE37	Q2PE37	Lateral (2)	0.258623	0.204156
4502	Khc	Kinesin heavy chain	P17210	P17210	Lateral (2)	0.162534	0.145421
4550	Hsf	Heat shock factor protein	Q4H2F8	Q4H2F8	Lateral (2)	-0.388144	-0.395163
4186	Df31		O16043	O16043	Lateral (2)	NaN	-0.85322
4656	Gnf1	Replication factor C subunit 1	P35600	P35600	Lateral (2)	-0.287517	-0.285696
4662	Gnf1	Replication factor C subunit 1	P35600	P35600	Lateral (2)	0.296853	0.261949
4712	lola	'Longitudinals lacking protein, isoform G;Longitudinals lacking protein, isoforms H/M/V;Longitudinals lacking protein, isoforms A...' <Preview truncated at 128 characters>	P42283	P42283	Lateral (2)	-0.483274	-0.43441
4726	betaCop	Coatomer subunit beta	P45437	P45437	Lateral (2)	0.141704	0.105263
4780	FK506-bp1	39 kDa FK506-binding nuclear protein	P54397	P54397	Lateral (2)	0.281617	0.257696
4824	smo	Protein smoothened	P91682	P91682	Lateral (2)	-0.452651	-0.369653
4840	ndl	Serine protease nudel	P98159	P98159	Lateral (2)	0.364429	0.368164
4131	fs(1)h	Homeotic protein female sterile	M9PJC7	M9PJC7	Lateral (2)	-0.356639	-0.338989
5258	Set1	Histone-lysine N-methyltransferase SETD1	Q5LJZ2	Q5LJZ2	Lateral (2)	0.240151	0.239213
5280			Q5U0X8	Q5U0X8	Lateral (2)	-0.108644	-0.098151
5281			Q5U0X8	Q5U0X8	Lateral (2)	0.2888	0.253629
5342			Q7JRH5	Q7JRH5	Lateral (2)	0.256113	0.188943
5362	Prp38		Q7JVL3	Q7JVL3	Lateral (2)	0.234363	0.305734
3935	Cdk12	Cyclin-dependent kinase 12	M9PG50	M9PG50	Lateral (2)	0.237713	0.261842
3881	Nopp140		M9PFZ1;Q7KTV5	Q7KTV5	Lateral (2)	NaN	-0.55399
3849	CG6479-RA;CG6479-RB		M9PFY2	M9PFY2	Lateral (2)	0.298268	0.300178
3827	Tor	Target of rapamycin	M9PFS0	M9PFS0	Lateral (2)	-0.333534	-0.327115
3816	RpL13	60S ribosomal protein L13	M9PFF0	M9PFF0	Lateral (2)	-0.353801	-0.324311
3768	mge		M9PEJ1	M9PEJ1	Lateral (2)	0.156408	0.217605
3690			Q0E8R8	Q0E8R8	Lateral (2)	-0.47117	-0.406955
3566	Dhc64C	Dynein heavy chain, cytoplasmic	M9PE73	M9PE73	Lateral (2)	0.258582	0.273723
3565	Dhc64C	Dynein heavy chain, cytoplasmic	M9PE73	M9PE73	Lateral (2)	0.24264	0.241572
3518	bib	Neurogenic protein big brain	M9PB86	M9PB86	Lateral (2)	NaN	-0.12279
3507	poe	Protein purity of essence	M9PB68	M9PB68	Lateral (2)	0.0953654	0.105922
3494	Ndae1	Anion exchange protein	M9PB60	M9PB60	Lateral (2)	0.298529	0.294304
3474	CG17078-RA		M9PAY6	M9PAY6	Lateral (2)	0.615933	0.61817
177	pug	'C-1-tetrahydrofolate synthase, cytoplasmic;Methylenetetrahydrofolate dehydrogenase;Methenyltetrahydrofolate cyclohydrolase;Formy...' <Preview truncated at 128 characters>	A0A0B4K623	A0A0B4K623	Lateral (2)	0.570678	0.542887
308	su(Hw)	Protein suppressor of hairy wing	A0A0B4K6W1	A0A0B4K6W1	Lateral (2)	0.338045	0.310834
377	garz		A1Z8W9	A1Z8W9	Lateral (2)	0.161966	0.139979
425	larp	La-related protein 1	A0A0B4K7Y7	A0A0B4K7Y7	Lateral (2)	-0.502598	-0.485607
459			A1Z945	A1Z945	Lateral (2)	0.333307	0.321007
573	sbb		Q9N693	Q9N693	Lateral (2)	0.330278	0.322105
633	SRPK		Q0E965	Q0E965	Lateral (2)	0.359513	0.363325
675	Mtor	Nucleoprotein TPR	A0A0B4KFE9	A0A0B4KFE9	Lateral (2)	0.272289	0.272723
713	Bruce		A0A0B4KH36	A0A0B4KH36	Lateral (2)	0.412343	0.379793
785	CG15099	Protein dopey-1 homolog	A0A0B4KG81	A0A0B4KG81	Lateral (2)	-0.488799	-0.52756
820	bon		A8WHL4	A8WHL4	Lateral (2)	0.250111	0.284258
939	GlyS	Glycogen [starch] synthase	A0A0B4KHJ5	A0A0B4KHJ5	Lateral (2)	0.275731	0.273007
1061	Map205		A0A0B4KI71	A0A0B4KI71	Lateral (2)	0.239735	0.269688
1084	coil		A0A0B4LEV8	A0A0B4LEV8	Lateral (2)	0.355993	0.375452
1222	Ca-P60A	Calcium-transporting ATPase;Calcium-transporting ATPase sarcoplasmic/endoplasmic reticulum type	A0A0B4LGB7	A0A0B4LGB7	Lateral (2)	0.241753	0.196522
1399	CG8223	Protein NASP homolog	A0A126BEE6	A0A126BEE6	Lateral (2)	-0.379265	-0.352764
1416	Not10	CCR4-NOT transcription complex subunit 10	A0A126GUU0	A0A126GUU0	Lateral (2)	0.196218	0.208395
1437	CG4951	Uncharacterized protein CG4951	A1A708	A1A708	Lateral (2)	0.605977	0.598348
1558	ADD1		A1Z8R2	A1Z8R2	Lateral (2)	0.351475	0.350138
1981			Q9VJI6	Q9VJI6	Lateral (2)	0.297067	0.298994
2044	lqf		M9PEM7	M9PEM7	Lateral (2)	0.248228	0.335202
2105			A8JV07	A8JV07	Lateral (2)	0.511204	0.470396
2223	Rrp1	Recombination repair protein 1	B7YZZ9	B7YZZ9	Lateral (2)	0.220411	0.230444
2229	Rrp1	Recombination repair protein 1	B7YZZ9	B7YZZ9	Lateral (2)	0.204455	0.303459
2310	RhoGAP71E		M9MRW2	M9MRW2	Lateral (2)	0.185372	0.165251
2316	frc	UDP-sugar transporter UST74c	B7Z066	B7Z066	Lateral (2)	0.18585	0.225388
2425			B7Z0I8	B7Z0I8	Lateral (2)	-0.332552	-0.297238
2542	Psc-RA;Psc	Polycomb group protein Psc	D0Z760	D0Z760	Lateral (2)	0.240962	0.26498
2678	Mi-2	Chromodomain-helicase-DNA-binding protein Mi-2 homolog	M9PIA6	M9PIA6	Lateral (2)	0.139831	0.115622
2864	tho2		Q9VQ76	Q9VQ76	Lateral (2)	-0.356583	NaN
2964	Spn		M9NDX8	M9NDX8	Lateral (2)	0.528216	0.52257
3037	unc-13		L0MPR2	L0MPR2	Lateral (2)	0.2017	0.118062
3120	Nrt	Neurotactin	M9MS15	M9MS15	Lateral (2)	0.212315	0.215689
3252	eIF5B		M9ND37	M9ND37	Lateral (2)	0.269149	0.23342
3457	Pep	Zinc finger protein on ecdysone puffs	M9NG39	M9NG39	Lateral (2)	0.349798	0.306295
6138	timeout		Q8INH7	Q8INH7	Lateral (2)	0.350066	0.321333
3458	Pep	Zinc finger protein on ecdysone puffs	M9NG39	M9NG39	Lateral (2)	-0.390502	-0.378137
3450	Plp		M9NFV3	M9NFV3	Lateral (2)	0.116155	0.199121
3354	rudhira	Breast carcinoma-amplified sequence 3 homolog	M9NED8	M9NED8	Lateral (2)	-0.456986	-0.400366
3230	l(2)gl	Lethal(2) giant larvae protein	M9NCX1	M9NCX1	Lateral (2)	0.353587	0.362307
3089	tweek		M9MSI8	M9MSI8	Lateral (2)	0.234491	0.315805
3002	Pp2A-29B	Serine/threonine-protein phosphatase PP2A 65 kDa regulatory subunit	M9MQH9	M9MQH9	Lateral (2)	-0.647378	-0.665074
2924	CG18508-RA;CG18508	UPF0729 protein CG18508	F3YDJ5	F3YDJ5	Lateral (2)	0.422894	0.431525
2846	Tango11	Transport and Golgi organization protein 11	E2QCK0	E2QCK0	Lateral (2)	-0.388028	-0.358407
2707			E1JIB9;X2JG79	E1JIB9	Lateral (2)	0.197462	0.235774
2581	Nop60B	H/ACA ribonucleoprotein complex subunit 4	E1JGV6	E1JGV6	Lateral (2)	0.0825517	0.0821873
2489	HIP-R;HIP	Hsc70-interacting protein 2;Hsc70-interacting protein 1	E2QD63	E2QD63	Lateral (2)	0.256141	0.273229
2348	Unr		B7Z0E2	B7Z0E2	Lateral (2)	0.221007	0.227745
2315	RhoGAP71E		M9MRW2	M9MRW2	Lateral (2)	0.291312	0.264197
2260	kis		B7Z002	B7Z002	Lateral (2)	0.199962	0.227057
2240	kis		B7Z002	B7Z002	Lateral (2)	0.106362	0.0159259
2224	Rrp1	Recombination repair protein 1	B7YZZ9	B7YZZ9	Lateral (2)	0.258858	0.168574
2107			A8JV07	A8JV07	Lateral (2)	-0.44005	-0.438638
2021	kst		M9PBL6	M9PBL6	Lateral (2)	0.318089	0.292612
1743			A1ZBE9	A1ZBE9	Lateral (2)	0.3244	0.312101
1661	CG8414	Polynucleotide 5'-hydroxyl-kinase NOL9	A1ZA92	A1ZA92	Lateral (2)	0.342422	0.354336
1562	ADD1		A1Z8R2	A1Z8R2	Lateral (2)	-0.465529	-0.392254
1438	CG4951	Uncharacterized protein CG4951	A1A708	A1A708	Lateral (2)	0.15346	0.14492
1436	CG4951	Uncharacterized protein CG4951	A1A708	A1A708	Lateral (2)	0.154757	0.14492
1406	Madm	Nuclear receptor-binding protein homolog	A0A126GUQ5	A0A126GUQ5	Lateral (2)	-0.709479	-0.630293
1393	CG8223	Protein NASP homolog	A0A126BEE6	A0A126BEE6	Lateral (2)	0.1334	0.0877815
1150	CG8370	Transmembrane protein 131 homolog	A0A0B4LFJ4	A0A0B4LFJ4	Lateral (2)	0.415004	0.411772
1083	coil		A0A0B4LEV8	A0A0B4LEV8	Lateral (2)	0.194252	0.108322
997			A0A0B4KHY8	A0A0B4KHY8	Lateral (2)	0.387579	0.387532
900	Rpn2	26S proteasome non-ATPase regulatory subunit 1	A0A0B4KHE9	A0A0B4KHE9	Lateral (2)	0.158531	0.171486
794	hrg		Q9N6D7	Q9N6D7	Lateral (2)	0.231911	0.245104
775	CG15099	Protein dopey-1 homolog	A0A0B4KG81	A0A0B4KG81	Lateral (2)	-0.464804	-0.436922
703	Kdm2	JmjC domain-containing histone demethylation protein 1	A0A0B4KFJ7	A0A0B4KFJ7	Lateral (2)	-0.213104	-0.230126
634	SRPK		Q0E965	Q0E965	Lateral (2)	0.254888	0.316654
587	Ipk1	Inositol-pentakisphosphate 2-kinase	A0A0B4KEV9	A0A0B4KEV9	Lateral (2)	0.511848	0.529982
507			A0A0B4KEE7	A0A0B4KEE7	Lateral (2)	-0.363147	-0.354898
445	Prosap		A0A0B4LF25	A0A0B4LF25	Lateral (2)	0.195059	0.190087
421	larp	La-related protein 1	A0A0B4K7Y7	A0A0B4K7Y7	Lateral (2)	0.378874	0.396909
372	mod	DNA-binding protein modulo	A0A0B4K7G4	A0A0B4K7G4	Lateral (2)	0.29686	0.296365
277	scrib	Protein lap4	A0A0B4KHY2	A0A0B4KHY2	Lateral (2)	-0.35285	-0.357161
13389			Q9W397	Q9W397	Lateral (2)	-0.267932	-0.261933
13366	Tango5		Q9W2S1	Q9W2S1	Lateral (2)	0.40544	0.349502
13365	Tango5		Q9W2S1	Q9W2S1	Lateral (2)	0.324809	0.278243
13316			Q9VZS1	Q9VZS1	Lateral (2)	0.252223	0.285909
13263			X2JF83	X2JF83	Lateral (2)	-0.216146	-0.188712
13115	l(3)psg2		Q9VRM6	Q9VRM6	Lateral (2)	0.571087	0.571405
13042			Q9VNE0	Q9VNE0	Lateral (2)	0.212586	0.22824
12958	CG4751	MPN domain-containing protein CG4751	Q9VKJ1	Q9VKJ1	Lateral (2)	0.281265	0.323119
12892			Q9VHI8	Q9VHI8	Lateral (2)	0.23456	0.200649
12878	RnpS1		Q9VHC0	Q9VHC0	Lateral (2)	0.304453	0.302655
12869	MBD-R2		Q9VGA4	Q9VGA4	Lateral (2)	-0.290069	-0.253531
12828	Rlip	RalA-binding protein 1	Q9VDG2	Q9VDG2	Lateral (2)	NaN	-0.234372
12789			Q9VC54	Q9VC54	Lateral (2)	0.465954	0.409857
12755			Q9VAU6	Q9VAU6	Lateral (2)	-0.372343	-0.407023
12754	Slbp	Histone RNA hairpin-binding protein	Q9VAN6	Q9VAN6	Lateral (2)	-0.0246929	0.00989176
12715	scra	Actin-binding protein anillin	Q9V4P1	Q9V4P1	Lateral (2)	0.303065	0.291942
12708	ZnT35C		Q9V471	Q9V471	Lateral (2)	0.364282	0.316903
12689	Jafrac1	Peroxiredoxin 1	X2JF59	X2JF59	Lateral (2)	NaN	-0.383056
12593	kuk		Q8SX89	Q8SX89	Lateral (2)	0.0135846	0.0737394
12391	Map60		Q7K180	Q7K180	Lateral (2)	0.409694	0.407188
12378	dup		Q7JVY2	Q7JVY2	Lateral (2)	-0.397883	-0.445994
12319	l(2)not	Lethal(2)neighbour of tid protein	Q27333	Q27333	Lateral (2)	0.408591	0.422211
12305	Cp190	Centrosome-associated zinc finger protein CP190	Q24478	Q24478	Lateral (2)	0.243644	0.275518
12300	l(2)dtl	Protein lethal(2)denticleless	Q24371	Q24371	Lateral (2)	0.323399	0.388201
12275	Cnx99A;Cnx14D		Q0KHZ9	Q0KHZ9	Lateral (2)	-0.435764	-0.527388
12228	polo	Serine/threonine-protein kinase polo	P52304	P52304	Lateral (2)	NaN	-0.48415
12203	Gnf1	Replication factor C subunit 1	P35600	P35600	Lateral (2)	0.246167	0.244476
12190	Aats-glupro	Bifunctional glutamate/proline--tRNA ligase;Glutamate--tRNA ligase;Proline--tRNA ligase	P28668	P28668	Lateral (2)	0.266335	0.232153
12099	Df31		O16043	O16043	Lateral (2)	-0.299414	-0.400193
12050	Cdk12	Cyclin-dependent kinase 12	M9PG50	M9PG50	Lateral (2)	0.237851	0.267433
12041	Nopp140		M9PFZ1;Q7KTV5	Q7KTV5	Lateral (2)	-1.03053	-0.827043
12016	stc	Protein shuttle craft	M9PDG3	M9PDG3	Lateral (2)	0.352464	0.34038
11963	Pep	Zinc finger protein on ecdysone puffs	M9NG39	M9NG39	Lateral (2)	0.572793	0.587474
11694			A8JV07	A8JV07	Lateral (2)	-0.445886	-0.391847
11679	kst		M9PBL6	M9PBL6	Lateral (2)	-0.376849	-0.363837
11647	D1	Chromosomal protein D1	A4V2K7	A4V2K7	Lateral (2)	0.373939	0.380699
11581	BubR1		A1Z6I7	A1Z6I7	Lateral (2)	0.17016	0.177883
11580	BubR1		A1Z6I7	A1Z6I7	Lateral (2)	0.277545	0.288678
11566	CG8223	Protein NASP homolog	A0A126BEE6	A0A126BEE6	Lateral (2)	0.386129	0.371964
11507	Map205	205 kDa microtubule-associated protein	A0A0B4KI71;Q8IMF5	Q8IMF5	Lateral (2)	0.376021	0.371939
11411	SRPK		Q0E965	Q0E965	Lateral (2)	0.274094	0.246606
11401	row		Q95RL2	Q95RL2	Lateral (2)	0.306874	0.319546
10911	jumu		Q9XTP7	Q9XTP7	Lateral (2)	0.273819	0.34882
10854	eIF2B-epsilon		Q9W541	Q9W541	Lateral (2)	0.32142	0.339698
10843	EG:67A9.2		Q9W526	Q9W526	Lateral (2)	0.158806	0.215548
10792	rb	AP-3 complex subunit beta	Q9W4K1	Q9W4K1	Lateral (2)	0.233127	0.280756
10734	Rbcn-3A		Q9W425	Q9W425	Lateral (2)	0.211573	0.207312
10652	CG1677-RA		X2JE07	X2JE07	Lateral (2)	0.142222	0.0643618
10572			Q9W397	Q9W397	Lateral (2)	0.331055	0.345992
10488	nocte		Q9W2U7	Q9W2U7	Lateral (2)	0.266071	0.262517
10469	Tango5		Q9W2S1	Q9W2S1	Lateral (2)	0.473665	0.441364
10457			Q9W2N6	Q9W2N6	Lateral (2)	0.296828	0.275177
10455			Q9W2N6	Q9W2N6	Lateral (2)	0.199497	0.107556
10336	Nap1		Q9W1G7	Q9W1G7	Lateral (2)	0.125288	0.126595
10335	Nap1		Q9W1G7	Q9W1G7	Lateral (2)	0.0512177	0.00185665
10240	RpL23A		Q9W0A8	Q9W0A8	Lateral (2)	0.370337	0.353147
10116	CG1737-RA		X2JEU3	X2JEU3	Lateral (2)	0.369447	0.338173
10058	ATP7		Q9VYT4	Q9VYT4	Lateral (2)	0.0918837	0.0626071
10017	CG15747-RA		Q9VYE3	Q9VYE3	Lateral (2)	-0.668556	-0.752583
9827	CG32549-RF		Q9VWV2	Q9VWV2	Lateral (2)	-0.345305	-0.359242
9783	CG7332	Protein FAM188A homolog	X2JL49	X2JL49	Lateral (2)	NaN	-0.547415
9782	CG7332	Protein FAM188A homolog	X2JL49	X2JL49	Lateral (2)	0.0385039	0.129964
9770			X2JFQ1	X2JFQ1	Lateral (2)	0.363022	0.390661
9684	Rpn1		Q9VW54	Q9VW54	Lateral (2)	-0.469522	-0.418189
9568	Smn	Survival motor neuron protein	Q9VV74	Q9VV74	Lateral (2)	0.183251	0.221207
9470	CG13484-RA		Q9VUC4	Q9VUC4	Lateral (2)	0.345299	0.358997
9432	Abp1	Drebrin-like protein	Q9VU84	Q9VU84	Lateral (2)	0.351409	0.335787
9397	SRm160		Q9VU43	Q9VU43	Lateral (2)	0.27356	0.245272
9380	SRm160		Q9VU43	Q9VU43	Lateral (2)	0.198567	0.269714
9379	SRm160		Q9VU43	Q9VU43	Lateral (2)	0.167966	0.130867
9378	SRm160		Q9VU43	Q9VU43	Lateral (2)	0.181282	0.144529
9372	SRm160		Q9VU43	Q9VU43	Lateral (2)	0.265778	0.183251
9329	Grip163		Q9VTS3	Q9VTS3	Lateral (2)	-0.658475	-0.606134
9294	SuUR	Protein suppressor of underreplication	Q9VTE2	Q9VTE2	Lateral (2)	-0.548041	-0.49383
9203	MED24	Mediator of RNA polymerase II transcription subunit 24	Q9VSF2	Q9VSF2	Lateral (2)	0.17616	0.19308
9139	scny	Ubiquitin carboxyl-terminal hydrolase 36	Q9VRP5	Q9VRP5	Lateral (2)	0.20651	0.19108
9116	sinu		Q9VRM3	Q9VRM3	Lateral (2)	0.373255	0.449663
9109			Q9VRG8	Q9VRG8	Lateral (2)	0.330587	0.320807
8971	capt	Adenylyl cyclase-associated protein	Q9VPX7	Q9VPX7	Lateral (2)	0.525002	0.475081
8970	capt	Adenylyl cyclase-associated protein	Q9VPX7	Q9VPX7	Lateral (2)	0.285592	0.296945
8948	mbm		Q9VPM5	Q9VPM5	Lateral (2)	NaN	-0.553912
8927	Tbc1d15-17		Q9VPL5	Q9VPL5	Lateral (2)	0.118355	0.201122
8814			Q9VNH5	Q9VNH5	Lateral (2)	0.127124	0.195719
8802	RpL13A	60S ribosomal protein L13a	Q9VNE9	Q9VNE9	Lateral (2)	0.299241	0.28531
8762			Q9VNE0	Q9VNE0	Lateral (2)	0.228872	0.2454
8689	CG7371-RA		Q9VMQ8	Q9VMQ8	Lateral (2)	NaN	-0.451397
8583	SmE	Probable small nuclear ribonucleoprotein E	Q9VLV5	Q9VLV5	Lateral (2)	0.124397	0.110071
8537	Srp54		Q9VL71	Q9VL71	Lateral (2)	0.328927	0.364018
8531	Srp54		Q9VL71	Q9VL71	Lateral (2)	0.409724	0.405879
8530	Srp54		Q9VL71	Q9VL71	Lateral (2)	0.240452	0.236131
8487	Grip75	Gamma-tubulin complex component 4 homolog	Q9VKU7	Q9VKU7	Lateral (2)	0.420527	0.404698
8483			Q9VKU2	Q9VKU2	Lateral (2)	-0.530037	-0.518191
8480			Q9VKU2	Q9VKU2	Lateral (2)	0.135318	0.171619
8479			Q9VKU2	Q9VKU2	Lateral (2)	0.220531	0.208943
8453	CG4751	MPN domain-containing protein CG4751	Q9VKJ1	Q9VKJ1	Lateral (2)	0.333739	0.356075
8452	CG4751	MPN domain-containing protein CG4751	Q9VKJ1	Q9VKJ1	Lateral (2)	0.743816	0.729698
8439	CycY		Q9VKF0	Q9VKF0	Lateral (2)	-0.376011	-0.401194
8435			Q9VKD2	Q9VKD2	Lateral (2)	0.200655	0.152933
8425	rab3-GAP	Rab3 GTPase-activating protein regulatory subunit	Q9VKB9	Q9VKB9	Lateral (2)	0.630925	0.616284
8367	l(2)35Bd	mRNA cap guanine-N7 methyltransferase	Q9VJQ4	Q9VJQ4	Lateral (2)	0.302112	0.313228
8365	l(2)35Bd	mRNA cap guanine-N7 methyltransferase	Q9VJQ4	Q9VJQ4	Lateral (2)	-0.390087	-0.467407
8364	l(2)35Bd	mRNA cap guanine-N7 methyltransferase	Q9VJQ4	Q9VJQ4	Lateral (2)	0.311383	0.318243
8361	BG:DS09218.3		Q9VJK9	Q9VJK9	Lateral (2)	0.0942813	0.121451
8325	ncm	Pre-mRNA-splicing factor CWC22 homolog	Q9VJ87	Q9VJ87	Lateral (2)	0.245663	0.187691
8323	ncm	Pre-mRNA-splicing factor CWC22 homolog	Q9VJ87	Q9VJ87	Lateral (2)	0.386906	0.342395
8314	Grip71		Q9VJ57	Q9VJ57	Lateral (2)	0.298718	0.267013
8295	mib2		Q9VJ14	Q9VJ14	Lateral (2)	0.381711	0.441472
8250			Q9VIP2	Q9VIP2	Lateral (2)	0.139129	0.174267
8214	Nbr	Exonuclease mut-7 homolog	Q9VIF1	Q9VIF1	Lateral (2)	-0.452945	-0.395754
8213	Nbr	Exonuclease mut-7 homolog	Q9VIF1	Q9VIF1	Lateral (2)	0.58108	0.590614
8195			Q9VID9	Q9VID9	Lateral (2)	0.230333	0.184696
8181			Q9VID9	Q9VID9	Lateral (2)	0.718491	0.695939
8124			Q9VHN7	Q9VHN7	Lateral (2)	0.173386	0.171301
8063	RnpS1		Q9VHC0	Q9VHC0	Lateral (2)	0.222291	0.239991
8057	RnpS1		Q9VHC0	Q9VHC0	Lateral (2)	0.304453	0.302655
8056	RnpS1		Q9VHC0	Q9VHC0	Lateral (2)	0.178411	0.205297
7926	rin		Q9VFT4	Q9VFT4	Lateral (2)	-0.373576	-0.479901
7862	AdSL	Adenylosuccinate lyase	Q9VEP6	Q9VEP6	Lateral (2)	0.130789	0.0866815
7825			Q9VE98	Q9VE98	Lateral (2)	0.148975	0.170829
7683	Rassf		Q9VCQ7	Q9VCQ7	Lateral (2)	NaN	0.263371
7631			Q9VCF1	Q9VCF1	Lateral (2)	0.175624	0.146581
7628			Q9VCF1	Q9VCF1	Lateral (2)	0.291948	0.260481
7625			Q9VCD3	Q9VCD3	Lateral (2)	-0.313199	-0.299806
7518			Q9VC54	Q9VC54	Lateral (2)	0.186638	0.202684
7500	asp	Protein abnormal spindle	Q9VC45	Q9VC45	Lateral (2)	0.257821	0.342017
7476	Mink		Q9VC08	Q9VC08	Lateral (2)	0.172086	0.114976
7443	Nup358		Q9VBU7	Q9VBU7	Lateral (2)	0.239811	0.267389
7434	Nup358		Q9VBU7	Q9VBU7	Lateral (2)	0.396934	0.406028
7417	Nup358		Q9VBU7	Q9VBU7	Lateral (2)	1.22442	1.21702
7416	Nup358		Q9VBU7	Q9VBU7	Lateral (2)	0.377903	0.395402
7404	jigr1		Q9VBP5	Q9VBP5	Lateral (2)	0.268949	0.25768
7344	CG12260		Q9VAY8	Q9VAY8	Lateral (2)	-0.345501	-0.351186
7339	Moca-cyp		Q9VAW1	Q9VAW1	Lateral (2)	0.23203	0.220597
7338	Moca-cyp		Q9VAW1	Q9VAW1	Lateral (2)	0.234423	0.231181
7322	Moca-cyp		Q9VAW1	Q9VAW1	Lateral (2)	0.182283	0.132726
7315	Moca-cyp		Q9VAW1	Q9VAW1	Lateral (2)	0.121296	0.106233
7314	Moca-cyp		Q9VAW1	Q9VAW1	Lateral (2)	0.233783	0.206006
7223			Q9V9U3	Q9V9U3	Lateral (2)	-0.224374	-0.191481
7221			Q9V9U3	Q9V9U3	Lateral (2)	0.362969	0.369704
7212	Acf1		Q9V9T4	Q9V9T4	Lateral (2)	0.191723	0.192166
7159	scra	Actin-binding protein anillin	Q9V4P1	Q9V4P1	Lateral (2)	0.836329	0.806821
7103	CG9776	Zinc finger matrin-type protein CG9776	Q9V468	Q9V468	Lateral (2)	0.117312	0.094196
6926	abs	ATP-dependent RNA helicase abstrakt	Q9V3C0	Q9V3C0	Lateral (2)	-0.774985	-0.738698
6925	abs	ATP-dependent RNA helicase abstrakt	Q9V3C0	Q9V3C0	Lateral (2)	-0.774985	-0.747721
6910	Gtp-bp	Signal recognition particle receptor subunit alpha homolog	Q9U5L1	Q9U5L1	Lateral (2)	0.875472	0.848478
6748			Q95SH7	Q95SH7	Lateral (2)	0.379223	0.334865
6710	Atu	Another transcription unit protein	Q94546	Q94546	Lateral (2)	0.27416	0.228653
6654	Rel	Nuclear factor NF-kappa-B p110 subunit;Nuclear factor NF-kappa-B p68 subunit;Nuclear factor NF-kappa-B p49 subunit	Q94527	Q94527	Lateral (2)	0.239178	0.248867
6653	Rel	Nuclear factor NF-kappa-B p110 subunit;Nuclear factor NF-kappa-B p68 subunit;Nuclear factor NF-kappa-B p49 subunit	Q94527	Q94527	Lateral (2)	0.239178	0.248867
6651	Ork1	Open rectifier potassium channel protein 1	X2JD82	X2JD82	Lateral (2)	0.287401	0.295981
6625	pUf68	Poly(U)-binding-splicing factor half pint	Q8T6B9	Q8T6B9	Lateral (2)	0.313832	0.235124
6618	dlt	Protein disks lost	Q8T626	Q8T626	Lateral (2)	0.385996	0.372834
6613	Rrp45		Q8T4A9	Q8T4A9	Lateral (2)	0.215604	0.248741
6560	Aats-lys	Lysine--tRNA ligase	Q8SXM8	Q8SXM8	Lateral (2)	0.360984	0.336473
6547	kuk		Q8SX89	Q8SX89	Lateral (2)	-0.209311	-0.179049
6410	LBR	Lamin-B receptor	Q8MLV1	Q8MLV1	Lateral (2)	0.1897	0.222653
6409	LBR	Lamin-B receptor	Q8MLV1	Q8MLV1	Lateral (2)	0.1897	0.222653
6389	CG2199	Zinc finger protein CG2199	Q8IRH5	Q8IRH5	Lateral (2)	0.174201	0.220421
6379	YT521-B		Q8IRD2	Q8IRD2	Lateral (2)	-0.454298	-0.474196
6308	Nup205		Q9VWB8	Q9VWB8	Lateral (2)	0.395065	0.429351
6235	Cul3		Q9V475	Q9V475	Lateral (2)	0.150442	0.214753
6151	sle;CG12592	Protein slender lobes;Slender lobes-like protein	Q8INM3	Q8INM3	Lateral (2)	0.510509	0.449722
53	Jabba		A0A0B4KG78;Q7K1Q6	Q7K1Q6	Ventral Tl10B (3)	-0.10224	-0.244791
3421	fry	Protein furry	M9NFQ5	M9NFQ5	Ventral Tl10B (3)	-0.0813332	-0.256052
3829	CG9705	Cold shock domain-containing protein CG9705	M9PFS8	M9PFS8	Ventral Tl10B (3)	0.0537861	-0.0718271
9796			Q9VWP5	Q9VWP5	Ventral Tl10B (3)	0.252882	-0.255692
9816	Rip11		X2JFP6	X2JFP6	Ventral Tl10B (3)	-0.0310575	-0.225174
109	CG2246-RB;CG2246-RA		Q961V3	Q961V3	Ventral Tl10B (3)	0.0393773	-0.0622896
13405	CG1677-RA		X2JE07	X2JE07	Ventral Tl10B (3)	-0.461522	-0.55098
13381	l(1)G0320		Q9W335	Q9W335	Ventral Tl10B (3)	-0.700345	-0.875067
310	su(Hw)	Protein suppressor of hairy wing	A0A0B4K6W1	A0A0B4K6W1	Ventral Tl10B (3)	0.203766	0.147993
336	mask	Ankyrin repeat and KH domain-containing protein mask	A0A0B4KHR8	A0A0B4KHR8	Ventral Tl10B (3)	0.306797	0.258256
346	Sin3A		Q5U0Y0;A0A0B4LF82;A1Z928	Q5U0Y0	Ventral Tl10B (3)	0.310925	0.290271
384	faf	Ubiquitin carboxyl-terminal hydrolase;Probable ubiquitin carboxyl-terminal hydrolase FAF	A0A0B4K7S0	A0A0B4K7S0	Ventral Tl10B (3)	0.0526479	-0.0295536
572	sbb		Q9N693	Q9N693	Ventral Tl10B (3)	0.299233	0.223164
766	MTA1-like		Q9VNF7	Q9VNF7	Ventral Tl10B (3)	-0.442264	-0.604502
899	Rpn2	26S proteasome non-ATPase regulatory subunit 1	A0A0B4KHE9	A0A0B4KHE9	Ventral Tl10B (3)	0.338487	0.223619
989	Ets97D	DNA-binding protein Ets97D	A0A0B4KHY6	A0A0B4KHY6	Ventral Tl10B (3)	0.0459083	-0.061017
998			A0A0B4KHY8	A0A0B4KHY8	Ventral Tl10B (3)	0.243304	0.0938121
1009	woc		A0A0B4KHZ0	A0A0B4KHZ0	Ventral Tl10B (3)	0.117318	0.0845176
1158	eIF3-S8	Eukaryotic translation initiation factor 3 subunit C	A0A0B4LFL2	A0A0B4LFL2	Ventral Tl10B (3)	0.16825	-0.0896037
1204	dom	Helicase domino	Q8MLW2	Q8MLW2	Ventral Tl10B (3)	0.163344	0.0656468
1227	retn	Protein dead ringer	A0A0B4LGF9	A0A0B4LGF9	Ventral Tl10B (3)	0.0622614	0.0249908
1249	betaTub60D;betaTub56D;betaTub97EF	Tubulin beta-3 chain;Tubulin beta-1 chain	A0A0B4LGH1;Q24560	Q24560	Ventral Tl10B (3)	-0.350282	-0.572064
1429	yrt		A0T1Z5	A0T1Z5	Ventral Tl10B (3)	0.024383	-0.102294
1486	BubR1		A1Z6I7	A1Z6I7	Ventral Tl10B (3)	-0.0542256	-0.155951
1503	Vps13		A1Z713	A1Z713	Ventral Tl10B (3)	0.071877	0.0440453
1543	Caf1-105		A1Z898	A1Z898	Ventral Tl10B (3)	0.317222	0.208842
1642	Su(var)2-HP2		A1Z9S6	A1Z9S6	Ventral Tl10B (3)	0.123604	0.0299017
1665	Dek		Q8IFW6	Q8IFW6	Ventral Tl10B (3)	0.119626	-5.05148e-05
1798	CG16742	WASH complex subunit FAM21 homolog	A1ZBW7	A1ZBW7	Ventral Tl10B (3)	-0.771307	-0.96378
1883	D1	Chromosomal protein D1	A4V2K7	A4V2K7	Ventral Tl10B (3)	-0.591707	-0.659275
1898	ball	Nucleosomal histone kinase 1	A4V3G8	A4V3G8	Ventral Tl10B (3)	0.188815	0.0657346
1905	ball	Nucleosomal histone kinase 1	A4V3G8	A4V3G8	Ventral Tl10B (3)	0.179313	0.0903009
2108			A8JV07	A8JV07	Ventral Tl10B (3)	0.162102	0.111817
2173	CG4040-RA		B5RJS0	B5RJS0	Ventral Tl10B (3)	-0.436307	-0.475549
2251	kis		B7Z002	B7Z002	Ventral Tl10B (3)	-0.978464	-1.3175
2258	kis		B7Z002	B7Z002	Ventral Tl10B (3)	-0.0693486	-0.196493
2484	CG18815-RA		Q9I7R0	Q9I7R0	Ventral Tl10B (3)	-0.440385	-0.545186
2515	CoRest	REST corepressor	C7LAG1;Q59E36	Q59E36	Ventral Tl10B (3)	0.379178	-0.0386429
2676	Mi-2	Chromodomain-helicase-DNA-binding protein Mi-2 homolog	M9PIA6	M9PIA6	Ventral Tl10B (3)	0.215032	0.0709961
2695	CG2162-RB		Q8MRH9	Q8MRH9	Ventral Tl10B (3)	-0.425023	-0.587659
2797	Set2	Histone-lysine N-methyltransferase;Probable histone-lysine N-methyltransferase CG1716	E1JJN9	E1JJN9	Ventral Tl10B (3)	0.0860968	0.0370184
2803	Set2	Histone-lysine N-methyltransferase;Probable histone-lysine N-methyltransferase CG1716	E1JJN9	E1JJN9	Ventral Tl10B (3)	0.164283	0.128435
2837	bin3	Probable RNA methyltransferase bin3	E2QC61	E2QC61	Ventral Tl10B (3)	0.277052	0.177446
2986	Spn		M9NDX8	M9NDX8	Ventral Tl10B (3)	-0.373711	-0.418664
3007	Crk	Adapter molecule Crk	H9XVM7	H9XVM7	Ventral Tl10B (3)	0.19741	0.179376
3041	Rfabg	Apolipophorins;Apolipophorin-2;Apolipophorin-1	L0MPS3	L0MPS3	Ventral Tl10B (3)	0.248109	0.142223
3071	CG4747	Putative oxidoreductase GLYR1 homolog	X2JDP6	X2JDP6	Ventral Tl10B (3)	0.208155	0.107901
3232	dia	Protein diaphanous	M9PDV1	M9PDV1	Ventral Tl10B (3)	-0.630271	-0.747394
3305	BicD	Protein bicaudal D	M9NDR2	M9NDR2	Ventral Tl10B (3)	-0.367842	-0.426005
3342	2001-12-01	Defective chorion-1 protein, FC125 isoform	M9NEA7	M9NEA7	Ventral Tl10B (3)	0.273135	0.1414
3435	fry		M9NFQ5	M9NFQ5	Ventral Tl10B (3)	0.202175	0.120271
3453	Plp		M9NFV3	M9NFV3	Ventral Tl10B (3)	-0.544214	-0.623913
3686	eRF1	Eukaryotic peptide chain release factor subunit 1	M9PD27	M9PD27	Ventral Tl10B (3)	0.100869	0.0164011
3709	Wnk		M9PIH3	M9PIH3	Ventral Tl10B (3)	0.282255	0.228801
3738	hipk		M9PDR2	M9PDR2	Ventral Tl10B (3)	0.0543526	-0.156996
3777		Anion exchange protein	Q7KUD6	Q7KUD6	Ventral Tl10B (3)	0.0280336	-0.0525488
3778		Anion exchange protein	Q7KUD6	Q7KUD6	Ventral Tl10B (3)	0.0651414	-0.0320021
3880	Nopp140		M9PFZ1;Q7KTV5	Q7KTV5	Ventral Tl10B (3)	0.218856	0.170069
3920	Arf79F	ADP-ribosylation factor 1	M9PG22	M9PG22	Ventral Tl10B (3)	-0.417372	-0.586157
4095	MESR6		Q9VVW6	Q9VVW6	Ventral Tl10B (3)	0.189154	0.113186
4115	Spc105R		Q9VPB2	Q9VPB2	Ventral Tl10B (3)	0.178218	0.112725
4145	su(s)	Protein suppressor of sable	M9W963	M9W963	Ventral Tl10B (3)	0.298018	0.283357
4306	crm	Protein cramped	O76906	O76906	Ventral Tl10B (3)	0.425492	0.147074
4349	Yp1	Vitellogenin-1	X2JD55	X2JD55	Ventral Tl10B (3)	0.154164	0.093767
4365	Yp1	Vitellogenin-1	X2JD55	X2JD55	Ventral Tl10B (3)	-0.452728	-0.526655
4469	EF2	Elongation factor 2	P13060	P13060	Ventral Tl10B (3)	0.238141	0.21425
4600	Aats-glupro	Bifunctional glutamate/proline--tRNA ligase;Glutamate--tRNA ligase;Proline--tRNA ligase	P28668	P28668	Ventral Tl10B (3)	0.0960663	-0.00477669
4636	lds	Transcription termination factor 2	P34739	P34739	Ventral Tl10B (3)	0.179099	0.175721
4806	Pka-R2	cAMP-dependent protein kinase type II regulatory subunit	P81900	P81900	Ventral Tl10B (3)	0.0516908	-0.0170246
4865	kel	Ring canal kelch protein;Kelch short protein	Q04652	Q04652	Ventral Tl10B (3)	-0.528269	-0.705937
4903	MEP-1		Q0E8J0	Q0E8J0	Ventral Tl10B (3)	-0.0347715	-0.107204
5010	Cdc37	Hsp90 co-chaperone Cdc37	Q24276	Q24276	Ventral Tl10B (3)	0.114317	0.0457077
5076	Ubp64E	Ubiquitin carboxyl-terminal hydrolase 64E	Q24574	Q24574	Ventral Tl10B (3)	0.104561	-0.0909575
5089	Ubp64E	Ubiquitin carboxyl-terminal hydrolase 64E	Q24574	Q24574	Ventral Tl10B (3)	0.0129636	-0.0881681
5233	scaf6		Q59E33	Q59E33	Ventral Tl10B (3)	0.0868528	-0.0337093
5410	Ak6	Adenylate kinase isoenzyme 6 homolog	Q7JYV7	Q7JYV7	Ventral Tl10B (3)	0.361177	0.229469
5529			Q7K3D4	Q7K3D4	Ventral Tl10B (3)	-1.0006	-1.49136
5729	CG1646	Pre-mRNA-processing factor 39	Q7KRW8	Q7KRW8	Ventral Tl10B (3)	0.156743	0.0783327
5836	smid		Q7KU82	Q7KU82	Ventral Tl10B (3)	0.207116	0.0338792
5963			Q7YZ99	Q7YZ99	Ventral Tl10B (3)	0.206948	0.159715
5994	CG7065	Uncharacterized protein CG7065	Q7YZA2	Q7YZA2	Ventral Tl10B (3)	-0.724323	-0.848849
6025	Akap200		Q9VLL3	Q9VLL3	Ventral Tl10B (3)	0.196192	0.141584
6072	SNF4Agamma		Q8I0A1;Q8SXT8;Q9VDD2	Q9VDD2	Ventral Tl10B (3)	0.347142	0.262494
6252	Bsg		Q8IPG9	Q8IPG9	Ventral Tl10B (3)	0.232889	0.204658
6383	dre4	FACT complex subunit spt16	Q8IRG6	Q8IRG6	Ventral Tl10B (3)	0.271757	0.195596
6469	BigH1		Q8MSC4	Q8MSC4	Ventral Tl10B (3)	0.206996	0.14681
6615	Rrp45		Q8T4A9	Q8T4A9	Ventral Tl10B (3)	0.191029	0.127545
6616	Rrp45		Q8T4A9	Q8T4A9	Ventral Tl10B (3)	-0.457621	-0.581252
6628			Q8T8T9	Q8T8T9	Ventral Tl10B (3)	0.235745	0.0227746
6633	CG9328-RA		Q8T9H0	Q8T9H0	Ventral Tl10B (3)	-0.402316	-0.489898
6943	spag		Q9V3E9	Q9V3E9	Ventral Tl10B (3)	0.0984273	-0.0287406
7131	dbr		Q9V474	Q9V474	Ventral Tl10B (3)	-1.47076	-1.70664
7185	TppII	Tripeptidyl-peptidase 2	Q9V6K1	Q9V6K1	Ventral Tl10B (3)	0.245321	0.155467
7239	zwilch	Protein zwilch	Q9VA00	Q9VA00	Ventral Tl10B (3)	-0.464072	-0.513417
7242	l(3)03670		Q9VA18	Q9VA18	Ventral Tl10B (3)	0.0518439	-0.111156
7279	Brd8		Q9VAM5	Q9VAM5	Ventral Tl10B (3)	0.201504	0.00731337
7454	CG31510-RA		Q9VBX4	Q9VBX4	Ventral Tl10B (3)	-0.460164	-0.602475
7502	asp	Protein abnormal spindle	Q9VC45	Q9VC45	Ventral Tl10B (3)	0.332555	0.24879
7531			Q9VC60	Q9VC60	Ventral Tl10B (3)	0.297726	0.196514
7549			Q9VC60	Q9VC60	Ventral Tl10B (3)	-0.0168705	-0.145721
7550			Q9VC60	Q9VC60	Ventral Tl10B (3)	-0.0168705	-0.145721
7566	CG5789-RA		Q9VC63	Q9VC63	Ventral Tl10B (3)	0.498339	-0.177479
7863			Q9VEP9	Q9VEP9	Ventral Tl10B (3)	-0.0055863	-0.063954
7864			Q9VEP9	Q9VEP9	Ventral Tl10B (3)	0.0589837	0.0103094
7969	MBD-R2		Q9VGA4	Q9VGA4	Ventral Tl10B (3)	0.179875	0.101903
7994	Blm	Bloom syndrome protein homolog	Q9VGI8	Q9VGI8	Ventral Tl10B (3)	-0.407273	-0.526655
8005			Q9VGL0	Q9VGL0	Ventral Tl10B (3)	-0.0102371	-0.115762
8132			Q9VHR5	Q9VHR5	Ventral Tl10B (3)	0.193435	0.159577
8286	Acn		Q9VJ12	Q9VJ12	Ventral Tl10B (3)	0.175156	-0.0678273
8322	ncm	Pre-mRNA-splicing factor CWC22 homolog	Q9VJ87	Q9VJ87	Ventral Tl10B (3)	0.493181	0.28732
8497	holn1	CD2 antigen cytoplasmic tail-binding protein 2 homolog	Q9VKV5	Q9VKV5	Ventral Tl10B (3)	0.243183	0.112445
8512	eEF1delta	Probable elongation factor 1-delta	Q9VL18	Q9VL18	Ventral Tl10B (3)	0.164961	0.0590368
8523	BEST:CK01296		Q9VL69	Q9VL69	Ventral Tl10B (3)	0.200863	0.165517
8524	Srp54		Q9VL71	Q9VL71	Ventral Tl10B (3)	-0.479933	-0.586174
8606	nop5		Q9VM69	Q9VM69	Ventral Tl10B (3)	0.310233	0.128175
8636	slam		Q9VME5	Q9VME5	Ventral Tl10B (3)	-0.533628	-0.649616
8637	slam		Q9VME5	Q9VME5	Ventral Tl10B (3)	-0.415186	-0.546828
8650	slam		Q9VME5	Q9VME5	Ventral Tl10B (3)	0.148971	0.0617631
8658	slam		Q9VME5	Q9VME5	Ventral Tl10B (3)	-0.696614	-0.934376
8835			Q9VNI5	Q9VNI5	Ventral Tl10B (3)	0.0411909	-0.055744
8860	MED1	Mediator of RNA polymerase II transcription subunit 1	Q9VP05	Q9VP05	Ventral Tl10B (3)	0.120497	0.0450966
8958			Q9VPR5	Q9VPR5	Ventral Tl10B (3)	-0.658027	-0.904246
9036			Q9VQK5	Q9VQK5	Ventral Tl10B (3)	0.234394	0.103836
9041			Q9VQK5	Q9VQK5	Ventral Tl10B (3)	0.22247	0.158684
9132	scny	Ubiquitin carboxyl-terminal hydrolase 36	Q9VRP5	Q9VRP5	Ventral Tl10B (3)	0.332055	0.185427
9257			Q9VT61	Q9VT61	Ventral Tl10B (3)	0.214186	0.144609
9287			Q9VTC1	Q9VTC1	Ventral Tl10B (3)	-0.516864	-0.650669
9309	NaPi-III		Q9VTG0	Q9VTG0	Ventral Tl10B (3)	0.172266	0.0506957
9563	Aats-tyr	Tyrosine--tRNA ligase	Q9VV60	Q9VV60	Ventral Tl10B (3)	0.181372	0.0292743
9569	Smn	Survival motor neuron protein	Q9VV74	Q9VV74	Ventral Tl10B (3)	0.268969	0.146465
9626			Q9VVG9	Q9VVG9	Ventral Tl10B (3)	0.189528	0.167878
9794			Q9VWP5	Q9VWP5	Ventral Tl10B (3)	0.196579	-0.0477755
9867	Rok	Rho-associated protein kinase	X2JKQ8	X2JKQ8	Ventral Tl10B (3)	0.514643	0.28654
10006	CG2691	RRP12-like protein	X2JEW2	X2JEW2	Ventral Tl10B (3)	0.062783	-0.0179735
10039	Usp7	Ubiquitin carboxyl-terminal hydrolase;Ubiquitin carboxyl-terminal hydrolase 7	X2JEX7	X2JEX7	Ventral Tl10B (3)	-0.751549	-0.952859
10136	CG1657	Receptor-mediated endocytosis protein 6 homolog	Q9VZ08	Q9VZ08	Ventral Tl10B (3)	-0.412203	-0.592157
10203	Non2		Q9VZY0	Q9VZY0	Ventral Tl10B (3)	-0.656663	-0.749146
10280	BcDNA:GH03108		Q9W0X8	Q9W0X8	Ventral Tl10B (3)	-0.463257	-0.595602
10301	uri		Q9W148	Q9W148	Ventral Tl10B (3)	-0.45092	-0.5736
10302	uri		Q9W148	Q9W148	Ventral Tl10B (3)	0.000779077	-0.111064
10321			Q9W1A8	Q9W1A8	Ventral Tl10B (3)	0.118376	-0.0885175
10343	DNA-ligI	DNA ligase 1	Q9W1H4	Q9W1H4	Ventral Tl10B (3)	0.142343	0.0622423
10423	px		Q9W244	Q9W244	Ventral Tl10B (3)	-0.557091	-0.904599
10424	px		Q9W244	Q9W244	Ventral Tl10B (3)	-0.557091	-0.904599
10430			Q9W281	Q9W281	Ventral Tl10B (3)	0.33463	0.284895
10486	nocte		Q9W2U7	Q9W2U7	Ventral Tl10B (3)	0.355143	0.172062
10509	nocte		Q9W2U7	Q9W2U7	Ventral Tl10B (3)	0.166238	0.101951
10531	l(1)G0320		Q9W335	Q9W335	Ventral Tl10B (3)	0.0333765	-0.110759
10871	inc		Q9W579	Q9W579	Ventral Tl10B (3)	0.37222	0.22862
10898	Slmap		Q9W5R5	Q9W5R5	Ventral Tl10B (3)	0.419692	-0.14069
10981	snama		Q9XZ21	Q9XZ21	Ventral Tl10B (3)	0.200268	0.146306
11020	Rif1		Q9XZ34	Q9XZ34	Ventral Tl10B (3)	0.168888	0.0519027
11030	XRCC1		Q9Y095	Q9Y095	Ventral Tl10B (3)	-0.470726	-0.776093
11112	Vps4		Q9Y162	Q9Y162	Ventral Tl10B (3)	0.0731508	-0.0359196
11332			A0A0B4K6G6	A0A0B4K6G6	Ventral Tl10B (3)	0.345098	0.0791994
11402	sbb		Q9N693	Q9N693	Ventral Tl10B (3)	0.202701	0.146069
11404	sbb		Q9N693	Q9N693	Ventral Tl10B (3)	0.115182	0.0551054
11611	Su(var)2-HP2		A1Z9S6	A1Z9S6	Ventral Tl10B (3)	0.237456	0.0723522
11726	kis		B7Z002	B7Z002	Ventral Tl10B (3)	0.265688	0.246609
11730	kis		B7Z002	B7Z002	Ventral Tl10B (3)	-0.93767	-1.17243
11956	fry		M9NFQ5	M9NFQ5	Ventral Tl10B (3)	-0.750595	-0.917136
11993	Hsp83	Heat shock protein 83	M9PBL3	M9PBL3	Ventral Tl10B (3)	0.141483	-0.0634196
12097	Df31		O16043	O16043	Ventral Tl10B (3)	0.301131	0.084541
12142	Yp1	Vitellogenin-1	X2JD55	X2JD55	Ventral Tl10B (3)	0.109898	0.0538144
12180	cdc2	Cyclin-dependent kinase 1	P23572	P23572	Ventral Tl10B (3)	-0.0185097	-0.0779555
12184	Rcc1	Regulator of chromosome condensation	P25171	P25171	Ventral Tl10B (3)	0.291652	0.203615
12188	tud	Maternal protein tudor	P25823	P25823	Ventral Tl10B (3)	-0.441906	-0.452326
12197	lds	Transcription termination factor 2	P34739	P34739	Ventral Tl10B (3)	0.25136	0.213406
12269			Q0E9B5	Q0E9B5	Ventral Tl10B (3)	0.279336	0.227791
12481			Q7PLL6	Q7PLL6	Ventral Tl10B (3)	0.0925415	0.0548968
12520	sle	Protein slender lobes	Q8INM3	Q8INM3	Ventral Tl10B (3)	-0.565798	-0.69979
12546	sle	Protein slender lobes	Q8INM3	Q8INM3	Ventral Tl10B (3)	0.166882	0.0542792
12582	BigH1		Q8MSC4	Q8MSC4	Ventral Tl10B (3)	-1.03991	NaN
13342	Nap1		Q9W1G7	Q9W1G7	Ventral Tl10B (3)	0.229424	0.154544
13272	Pdcd4		Q9VY91	Q9VY91	Ventral Tl10B (3)	-0.0305101	-0.0869251
13259	CG9947-RA		X2JKP3	X2JKP3	Ventral Tl10B (3)	0.11804	-0.0361381
13217	CG14184-RB		Q9VW73	Q9VW73	Ventral Tl10B (3)	0.194042	0.110438
13173	Hsc70Cb		Q9VUC1	Q9VUC1	Ventral Tl10B (3)	-0.259825	-0.52964
13118	scny	Ubiquitin carboxyl-terminal hydrolase 36	Q9VRP5	Q9VRP5	Ventral Tl10B (3)	0.274127	0.0915381
13094			Q9VQK5	Q9VQK5	Ventral Tl10B (3)	0.0825696	-0.0173618
12936	ncm	Pre-mRNA-splicing factor CWC22 homolog	Q9VJ87	Q9VJ87	Ventral Tl10B (3)	0.188893	0.072088
12874	Ranbp9		Q9VGP4	Q9VGP4	Ventral Tl10B (3)	0.133916	0.0375065
10841	EG:67A9.2		Q9W526	Q9W526	Ventral Tl10B (3)	0.00117345	-0.249438
7505	asp	Protein abnormal spindle	Q9VC45	Q9VC45	Ventral Tl10B (3)	0.121543	-0.320543
4456	Act5C;Act42A	Actin-5C;Actin-42A	X2JCP8	X2JCP8	Ventral Tl10B (3)	0.0382338	NaN
3383	chm	Histone acetyltransferase	M9NEW2	M9NEW2	Ventral Tl10B (3)	0.142039	-0.0458319
3382	chm	Histone acetyltransferase	M9NEW2	M9NEW2	Ventral Tl10B (3)	0.142039	-0.0458319
2339			B7Z0D7	B7Z0D7	Ventral Tl10B (3)	0.299197	-0.088671
2338			B7Z0D7	B7Z0D7	Ventral Tl10B (3)	0.299197	-0.088671
11930	BicD	Protein bicaudal D	M9NDR2	M9NDR2	Ventral Tl10B (3)	0.0565344	-0.144589
13331	Usp10		Q9W0L7	Q9W0L7	Ventral Tl10B (3)	0.253365	0.094042
987	Ets97D	DNA-binding protein Ets97D	A0A0B4KHY6	A0A0B4KHY6	Ventral Tl10B (3)	0.165864	-0.0322891
11806	Hrb27C	Heterogeneous nuclear ribonucleoprotein 27C	E1JHA4	E1JHA4	Ventral Tl10B (3)	0.0634512	-0.043285
10201	Non2		Q9VZY0	Q9VZY0	Ventral Tl10B (3)	-0.055249	-0.22705
9890	CG9947-RA		X2JKP3	X2JKP3	Ventral Tl10B (3)	0.0108423	-0.091339
9365	MICAL-like		Q9VU34	Q9VU34	Ventral Tl10B (3)	0.0611907	-0.0530634
8649	slam		Q9VME5	Q9VME5	Ventral Tl10B (3)	-0.308187	-0.480064
7780	mdlc		Q9VDP8	Q9VDP8	Ventral Tl10B (3)	0.000136266	-0.133374
7779	mdlc		Q9VDP8	Q9VDP8	Ventral Tl10B (3)	-0.0804103	-0.227975
7579			Q9VC94	Q9VC94	Ventral Tl10B (3)	-0.0600613	-0.161929
6659	Atu	Another transcription unit protein	Q94546	Q94546	Ventral Tl10B (3)	0.0822444	0.00298442
6373	YT521-B		Q8IRD2	Q8IRD2	Ventral Tl10B (3)	-0.0528635	-0.133871
6367	CG32251	Claspin homolog	Q8IRB5	Q8IRB5	Ventral Tl10B (3)	0.111586	-0.292535
6346	CG32251	Claspin homolog	Q8IRB5	Q8IRB5	Ventral Tl10B (3)	0.0114934	-0.152933
5605	Ubc10		Q7K738	Q7K738	Ventral Tl10B (3)	-0.157633	-0.27261
5169	egg	Histone-lysine N-methyltransferase eggless	Q32KD2	Q32KD2	Ventral Tl10B (3)	0.0967209	-0.105539
1160	eIF3-S8	Eukaryotic translation initiation factor 3 subunit C	A0A0B4LFL2	A0A0B4LFL2	Ventral Tl10B (3)	-0.0190933	-0.18252
12186	Rcc1	Regulator of chromosome condensation	P25171	P25171	Ventral Tl10B (3)	0.107134	0.0306672
12862	CG3817	RRP15-like protein	Q9VFE6	Q9VFE6	Ventral Tl10B (3)	0.138642	-0.14436
464	cnn	Centrosomin	A0A0B4K863	A0A0B4K863	Ventral Tl10B (3)	0.0566173	-0.145391
74	tacc		A0A0B4JCV4	A0A0B4JCV4	Ventral spn27A (4)	-0.179232	0.0439596
4235	Parg	Poly(ADP-ribose) glycohydrolase	O46043	O46043	Ventral spn27A (4)	-0.197404	-0.0375284
4648	lds	Transcription termination factor 2	P34739	P34739	Ventral spn27A (4)	-0.163682	-0.0921298
8087			Q9VHC8	Q9VHC8	Ventral spn27A (4)	-0.255431	-0.0902235
8475			Q9VKP5	Q9VKP5	Ventral spn27A (4)	-0.22122	-0.117859
9296	SuUR	Protein suppressor of underreplication	Q9VTE2	Q9VTE2	Ventral spn27A (4)	-0.10969	0.0806692
9537	mRpS31		Q9VUX1	Q9VUX1	Ventral spn27A (4)	-0.197599	-0.0897057
11651	ball	Nucleosomal histone kinase 1	A4V3G8	A4V3G8	Ventral spn27A (4)	-0.195553	0.201627
12408			Q7K4G8	Q7K4G8	Ventral spn27A (4)	-0.131628	0.17887
1893	ball	Nucleosomal histone kinase 1	A4V3G8	A4V3G8	Ventral spn27A (4)	-0.300585	0.140653
140	Taf1	Transcription initiation factor TFIID subunit 1	E1JJ72	E1JJ72	Ventral spn27A (4)	-0.034436	0.10953
244	pps		Q9VG78	Q9VG78	Ventral spn27A (4)	-0.0927955	0.0448389
449	CanB2	Calcineurin subunit B type 2	A0A0B4K833	A0A0B4K833	Ventral spn27A (4)	-0.63503	-0.526116
462	cnn	Centrosomin	A0A0B4K863	A0A0B4K863	Ventral spn27A (4)	-0.675269	-0.577615
585	sbb		Q9N693	Q9N693	Ventral spn27A (4)	-0.620404	-0.519041
590	Patronin	Patronin	A0A0B4KEY6;A0A0B4KFA4	A0A0B4KFA4	Ventral spn27A (4)	-0.669534	-0.640087
1172	Incenp		A0A0B4LFQ2	A0A0B4LFQ2	Ventral spn27A (4)	-0.11658	0.0345317
782	CG15099	Protein dopey-1 homolog	A0A0B4KG81	A0A0B4KG81	Ventral spn27A (4)	-0.164578	0.245266
789	Arp5	Actin-related protein 5	A0A0B4KG83	A0A0B4KG83	Ventral spn27A (4)	-0.51384	-0.423555
790	Arp5	Actin-related protein 5	A0A0B4KG83	A0A0B4KG83	Ventral spn27A (4)	-0.51384	-0.423555
826	CG9393	Metaxin-1 homolog	A0A0B4KGL6	A0A0B4KGL6	Ventral spn27A (4)	-0.527716	-0.463058
880	Synd		A0A0B4KH28	A0A0B4KH28	Ventral spn27A (4)	0.0614317	0.0785517
917	puf	Ubiquitin carboxyl-terminal hydrolase	A0A0B4LIK5	A0A0B4LIK5	Ventral spn27A (4)	0.0524067	0.179997
967	Mes-4	Histone-lysine N-methyltransferase;Probable histone-lysine N-methyltransferase Mes-4	A0A0B4KHR6	A0A0B4KHR6	Ventral spn27A (4)	-0.663478	-0.451416
976	dan	Protein distal antenna	A0A0B4KHU6	A0A0B4KHU6	Ventral spn27A (4)	-0.026559	0.112466
1001	woc		A0A0B4KHZ0	A0A0B4KHZ0	Ventral spn27A (4)	0.00870025	0.0251013
1010	woc		A0A0B4KHZ0	A0A0B4KHZ0	Ventral spn27A (4)	0.139367	0.180121
1318	XNP		A0A0B4LHR3	A0A0B4LHR3	Ventral spn27A (4)	NaN	-0.325422
1328	heph		Q8IMF8	Q8IMF8	Ventral spn27A (4)	-0.621031	-0.491484
1387	FDY;vig2		A0A0S0X2W5;Q960D3	Q960D3	Ventral spn27A (4)	0.139786	0.203189
1479	BubR1		A1Z6I7	A1Z6I7	Ventral spn27A (4)	0.0519415	0.194403
1480	BubR1		A1Z6I7	A1Z6I7	Ventral spn27A (4)	0.171129	0.269054
1521	FANCI		A1Z7L1	A1Z7L1	Ventral spn27A (4)	-1.13151	-0.799284
1522	FANCI		A1Z7L1	A1Z7L1	Ventral spn27A (4)	-1.13151	-0.799284
1537	CG1665-RA		A1Z803	A1Z803	Ventral spn27A (4)	-0.0811957	0.0740111
1544	Caf1-105		A1Z898	A1Z898	Ventral spn27A (4)	0.21221	0.315437
1794			A1ZBW6	A1ZBW6	Ventral spn27A (4)	0.117599	0.191638
1934	ras	Inosine-5'-monophosphate dehydrogenase	A4V488	A4V488	Ventral spn27A (4)	0.148507	0.242604
1988	eIF4G		O61380	O61380	Ventral spn27A (4)	0.153353	0.179461
2142	Nup153	Nuclear pore complex protein Nup153	A8JV18	A8JV18	Ventral spn27A (4)	-0.963101	-0.735411
2271	kis		B7Z002	B7Z002	Ventral spn27A (4)	-0.657783	-0.488459
2320	Nedd4	E3 ubiquitin-protein ligase Nedd-4	B7Z067	B7Z067	Ventral spn27A (4)	-0.586118	-0.566638
2359	Snup		B7Z0I7	B7Z0I7	Ventral spn27A (4)	-0.484966	-0.433805
2398			B7Z0I8	B7Z0I8	Ventral spn27A (4)	0.195878	0.235339
2413			B7Z0I8	B7Z0I8	Ventral spn27A (4)	-0.639985	-0.523165
2424			B7Z0I8	B7Z0I8	Ventral spn27A (4)	-0.538704	-0.493379
2499	Trp1		X2J9A4	X2J9A4	Ventral spn27A (4)	-0.637188	-0.450082
2660	E(bx)	Nucleosome-remodeling factor subunit NURF301	M9PE12	M9PE12	Ventral spn27A (4)	-0.738944	-0.337624
2684	Mi-2	Chromodomain-helicase-DNA-binding protein Mi-2 homolog	M9PIA6	M9PIA6	Ventral spn27A (4)	0.197093	0.293294
2800	Set2	Histone-lysine N-methyltransferase;Probable histone-lysine N-methyltransferase CG1716	E1JJN9	E1JJN9	Ventral spn27A (4)	-0.533716	-0.303038
2836	bin3	Probable RNA methyltransferase bin3	E2QC61	E2QC61	Ventral spn27A (4)	0.0730142	0.220376
2955	Syb-RA		H1UUB1	H1UUB1	Ventral spn27A (4)	-0.680047	-0.55288
3023	4E-T		L0MLQ9	L0MLQ9	Ventral spn27A (4)	-0.0408214	0.0437177
3182	spen	Protein split ends	M9NCM6	M9NCM6	Ventral spn27A (4)	-0.436458	-0.313526
3183	spen	Protein split ends	M9NCM6	M9NCM6	Ventral spn27A (4)	-0.436458	-0.313526
3341	2001-12-01	'Defective chorion-1 protein, FC125 isoform;Defective chorion-1 protein, FC106 isoform;Defective chorion-1 protein, FC106 isoform...' <Preview truncated at 128 characters>	M9NEA7;M9NG31	M9NEA7	Ventral spn27A (4)	-0.826915	-0.613378
13550	Yp1	Vitellogenin-1	X2JD55	X2JD55	Ventral spn27A (4)	0.000865603	0.0714443
13524	Stat92E	Signal transducer and activator of transcription;Signal transducer and transcription activator	A0A0B4KHS6	A0A0B4KHS6	Ventral spn27A (4)	0.0530372	0.104039
13385	mxc		Q9W363	Q9W363	Ventral spn27A (4)	-0.788078	-0.64978
13308			Q9VZ60	Q9VZ60	Ventral spn27A (4)	0.130002	0.150877
12947	CG31729-RA;CG6263	Phospholipid-transporting ATPase	Q9VK04;Q9VK06	Q9VK06	Ventral spn27A (4)	NaN	-0.545581
12733			Q9V9U3	Q9V9U3	Ventral spn27A (4)	-0.575444	-0.407329
12684	Nab2		Q9V3H9	Q9V3H9	Ventral spn27A (4)	-0.0405433	0.0868879
12663	CG11505	La-related protein CG11505	Q9I7T7	Q9I7T7	Ventral spn27A (4)	0.11967	0.196679
12607			Q8SY69	Q8SY69	Ventral spn27A (4)	0.0999458	0.170721
12584	BigH1		Q8MSC4	Q8MSC4	Ventral spn27A (4)	-0.0486189	0.155436
12544	sle	Protein slender lobes	Q8INM3	Q8INM3	Ventral spn27A (4)	0.0243427	0.116328
12496	Akap200		Q9VLL3;Q8IPF5	Q9VLL3	Ventral spn27A (4)	-0.592826	-0.501136
12493	Akap200		Q9VLL3;Q8IPF5	Q9VLL3	Ventral spn27A (4)	0.28463	0.426827
12218	Klp61F	Bipolar kinesin KRP-130	P46863	P46863	Ventral spn27A (4)	0.122857	0.316683
12192	bnb	Protein bangles and beads	P29746	P29746	Ventral spn27A (4)	-0.97591	-0.453198
12183	Rcc1	Regulator of chromosome condensation	P25171	P25171	Ventral spn27A (4)	-0.101109	0.0450426
11850	Capr	Caprin homolog	E4NKG1	E4NKG1	Ventral spn27A (4)	0.12619	0.228668
11747	sowah		B7Z0B0	B7Z0B0	Ventral spn27A (4)	0.0600336	0.228801
11650	ball	Nucleosomal histone kinase 1	A4V3G8	A4V3G8	Ventral spn27A (4)	-0.112081	0.311863
11494	dan	Protein distal antenna	A0A0B4KHU6	A0A0B4KHU6	Ventral spn27A (4)	-0.12174	0.180898
11407	Patronin	Patronin	A0A0B4KEY6;A0A0B4KFA4	A0A0B4KFA4	Ventral spn27A (4)	-0.746238	-0.715201
11102	BcDNA.GH04978		Q9Y145	Q9Y145	Ventral spn27A (4)	0.122043	0.225517
10896	Slmap		Q9W5R5	Q9W5R5	Ventral spn27A (4)	-0.420251	-0.318537
10674			Q9W3S4	Q9W3S4	Ventral spn27A (4)	-0.524051	-0.404734
10567			Q9W394	Q9W394	Ventral spn27A (4)	0.190669	0.256131
10566			Q9W394	Q9W394	Ventral spn27A (4)	0.190669	0.256131
10553	mxc		Q9W363	Q9W363	Ventral spn27A (4)	-0.788078	-0.64978
10521	Psf3		Q9W2V7	Q9W2V7	Ventral spn27A (4)	0.172068	0.223325
10309	ocm		Q9W198	Q9W198	Ventral spn27A (4)	0.0421454	0.151214
10170	CG11583	Ribosome biogenesis protein BRX1 homolog	Q9VZE6	Q9VZE6	Ventral spn27A (4)	0.16534	0.254442
10159			Q9VZ60	Q9VZ60	Ventral spn27A (4)	-0.135857	0.171215
9899	hang	Zinc finger protein hangover	Q9VXG1	Q9VXG1	Ventral spn27A (4)	0.245524	0.27405
9707			Q9VWD5	Q9VWD5	Ventral spn27A (4)	-0.213009	-0.0543424
9567	Smn	Survival motor neuron protein	Q9VV74	Q9VV74	Ventral spn27A (4)	-0.00141688	0.0511432
9501	Msh6	Probable DNA mismatch repair protein Msh6	Q9VUM0	Q9VUM0	Ventral spn27A (4)	-0.0767887	-0.0390828
9307	NaPi-III		Q9VTG0	Q9VTG0	Ventral spn27A (4)	-0.571741	-0.467398
9297	SuUR	Protein suppressor of underreplication	Q9VTE2	Q9VTE2	Ventral spn27A (4)	-0.820014	-0.525752
9295	SuUR	Protein suppressor of underreplication	Q9VTE2	Q9VTE2	Ventral spn27A (4)	0.170634	0.279886
9248			Q9VT38	Q9VT38	Ventral spn27A (4)	0.208367	0.401588
9075	Bsg25A		Q9VR17	Q9VR17	Ventral spn27A (4)	0.144358	0.207123
9067			Q9VQZ8	Q9VQZ8	Ventral spn27A (4)	-0.543224	-0.469049
9026	Cwc25		Q9VQF5	Q9VQF5	Ventral spn27A (4)	-0.509051	-0.497507
8951	CG13690	Ribonuclease H2 subunit A	Q9VPP5	Q9VPP5	Ventral spn27A (4)	-0.0384938	0.177479
8949	Hop		Q9VPN5	Q9VPN5	Ventral spn27A (4)	-0.0054409	0.151012
8899	Pitslre	Serine/threonine-protein kinase PITSLRE	Q9VPC0	Q9VPC0	Ventral spn27A (4)	0.139274	0.211738
8891			Q9VP77	Q9VP77	Ventral spn27A (4)	-0.0854227	-0.00166714
8837			Q9VNI5	Q9VNI5	Ventral spn27A (4)	-0.0321256	0.0509804
8836			Q9VNI5	Q9VNI5	Ventral spn27A (4)	-0.111357	0.915357
8747			Q9VND7	Q9VND7	Ventral spn27A (4)	-0.523796	-0.422489
8476			Q9VKP5	Q9VKP5	Ventral spn27A (4)	-0.68796	-0.557876
8474			Q9VKP5	Q9VKP5	Ventral spn27A (4)	-0.951714	-0.769536
8444	CG4751	MPN domain-containing protein CG4751	Q9VKJ1	Q9VKJ1	Ventral spn27A (4)	0.127161	0.22815
8404	A16		Q9VK43	Q9VK43	Ventral spn27A (4)	0.157442	0.225751
8285	Acn		Q9VJ12	Q9VJ12	Ventral spn27A (4)	0.117609	0.229602
8284	Acn		Q9VJ12	Q9VJ12	Ventral spn27A (4)	0.0786636	0.176192
8283	Acn		Q9VJ12	Q9VJ12	Ventral spn27A (4)	0.132941	0.210577
8282	Acn		Q9VJ12	Q9VJ12	Ventral spn27A (4)	0.129452	0.210577
8281	Acn		Q9VJ12	Q9VJ12	Ventral spn27A (4)	-0.740666	-0.580596
8279	Acn		Q9VJ12	Q9VJ12	Ventral spn27A (4)	-0.726136	-0.584111
8266	l(2)37Cb		Q9VIZ3	Q9VIZ3	Ventral spn27A (4)	0.0920167	0.2087
8229	Cen		Q9VIK6	Q9VIK6	Ventral spn27A (4)	-0.0274857	0.0829162
8209	Mcm10	Protein MCM10 homolog	Q9VIE6	Q9VIE6	Ventral spn27A (4)	0.145816	0.173159
8196			Q9VID9	Q9VID9	Ventral spn27A (4)	0.0602653	0.198927
8159	Dmtn		Q9VI21	Q9VI21	Ventral spn27A (4)	-0.593994	-0.27514
8109	E(var)3-9		Q9VHJ3	Q9VHJ3	Ventral spn27A (4)	-0.672397	-0.505005
8078	rump		Q9VHC7	Q9VHC7	Ventral spn27A (4)	-0.549457	-0.477523
8029	Art1		Q9VGW7	Q9VGW7	Ventral spn27A (4)	NaN	-0.462902
8024	GCC88		Q9VGR1	Q9VGR1	Ventral spn27A (4)	-0.0938832	0.057966
8009			Q9VGL0	Q9VGL0	Ventral spn27A (4)	0.0276024	0.102988
8008			Q9VGL0	Q9VGL0	Ventral spn27A (4)	-0.52058	-0.395026
7940			Q9VG03	Q9VG03	Ventral spn27A (4)	-0.114073	-0.0182212
7860	Patr-1		Q9VEN9	Q9VEN9	Ventral spn27A (4)	-0.469871	-0.415983
7823			Q9VE79	Q9VE79	Ventral spn27A (4)	-0.0151327	0.1205
7785	mdlc		Q9VDP8	Q9VDP8	Ventral spn27A (4)	-0.106982	0.018929
7765	Srp72	Signal recognition particle subunit SRP72	Q9VDK7	Q9VDK7	Ventral spn27A (4)	-0.0451753	0.186729
7763	Rlip	RalA-binding protein 1	Q9VDG2	Q9VDG2	Ventral spn27A (4)	0.219712	0.234976
7532			Q9VC60	Q9VC60	Ventral spn27A (4)	NaN	-0.767296
7317	Moca-cyp		Q9VAW1	Q9VAW1	Ventral spn27A (4)	0.0101204	0.0974106
7235			Q9V9Z8	Q9V9Z8	Ventral spn27A (4)	0.167963	0.217985
7218			Q9V9U3	Q9V9U3	Ventral spn27A (4)	0.172074	0.245862
7201	NiPp1		Q9V7W9	Q9V7W9	Ventral spn27A (4)	-0.441967	-0.375823
6971	Nab2		Q9V3H9	Q9V3H9	Ventral spn27A (4)	0.0414218	0.149799
6821	lgs	Protein BCL9 homolog	Q961D9	Q961D9	Ventral spn27A (4)	-0.559767	-0.488589
6741	Pur-alpha		Q95RR6	Q95RR6	Ventral spn27A (4)	-1.20518	-0.731403
6714	Dref		Q94883	Q94883	Ventral spn27A (4)	-0.149651	-0.0641852
6706	Atu	Another transcription unit protein	Q94546	Q94546	Ventral spn27A (4)	0.0459751	0.0615663
6649	Dlc90F	Dynein light chain Tctex-type	Q94524	Q94524	Ventral spn27A (4)	0.118985	0.179353
6464	Reph		Q9VQV2	Q9VQV2	Ventral spn27A (4)	0.00306414	0.0559185
6282	pbl		Q8IQ95	Q8IQ95	Ventral spn27A (4)	-0.990069	-0.766279
6207	sle	Protein slender lobes	Q8INM3	Q8INM3	Ventral spn27A (4)	-0.0553279	0.293404
6102	LSm3		Q8IMX8	Q8IMX8	Ventral spn27A (4)	-0.00343437	0.183122
6006	Zn72D		Q86BI3	Q86BI3	Ventral spn27A (4)	-0.611781	-0.551896
5876	spoon		Q9W4C4	Q9W4C4	Ventral spn27A (4)	0.0923654	0.310655
5855	iPLA2-VIA		Q9VT60	Q9VT60	Ventral spn27A (4)	-0.617638	-0.551058
5722	CG1646	Pre-mRNA-processing factor 39	Q7KRW8	Q7KRW8	Ventral spn27A (4)	0.119983	0.197314
5680	TER94	Transitional endoplasmic reticulum ATPase TER94	Q7KN62	Q7KN62	Ventral spn27A (4)	NaN	-0.463327
5565			Q7K4G8	Q7K4G8	Ventral spn27A (4)	-0.204027	-0.0323296
5446	FLASH		Q7K0L8	Q7K0L8	Ventral spn27A (4)	0.145623	0.234368
5384	dup		Q7JVY2	Q7JVY2	Ventral spn27A (4)	0.0932774	0.209314
5383	dup		Q7JVY2	Q7JVY2	Ventral spn27A (4)	0.0579491	0.1332
5379	dup		Q7JVY2	Q7JVY2	Ventral spn27A (4)	0.0535198	0.110765
5375	dup		Q7JVY2	Q7JVY2	Ventral spn27A (4)	0.0554733	0.174611
5349			Q7JRH5	Q7JRH5	Ventral spn27A (4)	-0.425345	-0.379079
5265	Set1	Histone-lysine N-methyltransferase SETD1	Q5LJZ2	Q5LJZ2	Ventral spn27A (4)	-0.921578	-0.701775
4983	anon-i1		Q24050	Q24050	Ventral spn27A (4)	0.187999	0.474494
4964	Cnx99A		Q0KHZ9	Q0KHZ9	Ventral spn27A (4)	-0.553157	-0.364259
4893	CG7255-RE		Q0E8E5	Q0E8E5	Ventral spn27A (4)	0.0216728	0.0498011
4837	ndl	Serine protease nudel	P98159	P98159	Ventral spn27A (4)	0.260378	0.280412
4835	14-3-3epsilon	14-3-3 protein epsilon	P92177	P92177	Ventral spn27A (4)	NaN	-0.728396
4728	RpL7A	60S ribosomal protein L7a	X2JCS6	X2JCS6	Ventral spn27A (4)	-0.0589927	0.0702677
4443	Sry-delta	Serendipity locus protein delta	P07664	P07664	Ventral spn27A (4)	0.0355825	0.126795
4416	RpLP2	60S acidic ribosomal protein P2	P05389	P05389	Ventral spn27A (4)	0.064905	0.135325
4415	RpLP2	60S acidic ribosomal protein P2	P05389	P05389	Ventral spn27A (4)	0.210701	0.28356
4362	Yp1	Vitellogenin-1	X2JD55	X2JD55	Ventral spn27A (4)	NaN	-0.600086
4355	Yp1	Vitellogenin-1	X2JD55	X2JD55	Ventral spn27A (4)	-0.0465991	0.0829446
4334	His1:CG33801;His1:CG33807;His1:CG33834;His1:CG33861;His1	Histone H1	Q4ABE3	Q4ABE3	Ventral spn27A (4)	-0.011563	0.0540581
4316	SkpA		O77430	O77430	Ventral spn27A (4)	0.236802	0.307539
4179	Df31		O16043	O16043	Ventral spn27A (4)	0.165354	0.181466
3877	Nopp140		M9PFZ1;Q7KTV5	Q7KTV5	Ventral spn27A (4)	0.130086	0.222632
3838	CycT	Cyclin-T	M9PI89	M9PI89	Ventral spn27A (4)	-0.577954	-0.321566
3775		Anion exchange protein	Q7KUD6	Q7KUD6	Ventral spn27A (4)	NaN	-0.764164
3769	mge		M9PEJ1	M9PEJ1	Ventral spn27A (4)	0.287543	0.326983
3687	eRF1	Eukaryotic peptide chain release factor subunit 1	M9PD27	M9PD27	Ventral spn27A (4)	0.119509	0.235366
3647	cmet	Kinesin-like protein	M9PCX3	M9PCX3	Ventral spn27A (4)	-0.0799984	0.0389686
3633	numb	Protein numb	M9PCN6	M9PCN6	Ventral spn27A (4)	-0.0746998	-0.0258603
3560	Hsp83	Heat shock protein 83	M9PBL3	M9PBL3	Ventral spn27A (4)	0.108791	0.200649
3513	CG31712	UPF0430 protein CG31712	M9PB85	M9PB85	Ventral spn27A (4)	0.0590114	0.44112
17	CG10341	H/ACA ribonucleoprotein complex non-core subunit NAF1	A0A023GQ99	A0A023GQ99	Ventral spn27A (4)	-0.0224113	0.0140298
655	CG15187		A0A0B4KFB8	A0A0B4KFB8	Ventral spn27A (4)	-0.0816664	0.109754
2559	mfas-RJ;mfas		D3DMM4	D3DMM4	Ventral spn27A (4)	-0.126647	0.218057
13134	ldbr	Lariat debranching enzyme	Q9VSD7	Q9VSD7	Ventral spn27A (4)	NaN	0.0307172
12008	chif	Protein chiffon	M9PD16	M9PD16	Ventral spn27A (4)	0.0859089	0.294407
10697	RpL17	60S ribosomal protein L17	X2JIQ5	X2JIQ5	Ventral spn27A (4)	-0.0497925	0.138819
10204	Non2		Q9VZY0	Q9VZY0	Ventral spn27A (4)	NaN	0.309122
9566	Smn	Survival motor neuron protein	Q9VV74	Q9VV74	Ventral spn27A (4)	NaN	0.165468
8856	MED1	Mediator of RNA polymerase II transcription subunit 1	Q9VP05	Q9VP05	Ventral spn27A (4)	-0.0515459	0.146702
8528	Srp54		Q9VL71	Q9VL71	Ventral spn27A (4)	-0.25741	0.171942
7962			Q9VG69	Q9VG69	Ventral spn27A (4)	0.0830386	0.237859
7733	SNF4Agamma		Q9VDD2	Q9VDD2	Ventral spn27A (4)	-0.198982	0.0581257
7022	Rpt5		Q9V3V6	Q9V3V6	Ventral spn27A (4)	NaN	0.308292
6708	Atu	Another transcription unit protein	Q94546	Q94546	Ventral spn27A (4)	NaN	0.419001
5850	Uba2		Q7KUA4	Q7KUA4	Ventral spn27A (4)	NaN	-0.0291081
4882	TfIIFalpha	General transcription factor IIF subunit 1	Q05913	Q05913	Ventral spn27A (4)	0.185858	0.516206
4499	Khc	Kinesin heavy chain	P17210	P17210	Ventral spn27A (4)	-0.0124494	0.526936
4492	Top2	DNA topoisomerase 2	P15348	P15348	Ventral spn27A (4)	-0.00743631	0.155714
4431	Yp3	Vitellogenin-3	X2JEX8	X2JEX8	Ventral spn27A (4)	0.128915	0.282828
4094	MESR6		Q9VVW6	Q9VVW6	Ventral spn27A (4)	NaN	0.237654
643	CG7701;CG30015-RB		A8DY98	A8DY98	Ventral spn27A (4)	-0.101588	0.12051
78	tacc		A0A0B4JCV4	A0A0B4JCV4	Ventral spn27A (4)	NaN	1.6827
1976	nub	POU domain protein;Protein nubbin	X2JDY7	X2JDY7	Ventral Tl10B spn27A (5)	0.108747	0.00099525
4495	Top2	DNA topoisomerase 2	P15348	P15348	Ventral Tl10B spn27A (5)	0.0809974	0.0859452
2517	CoRest	REST corepressor	C7LAG1;Q59E36	Q59E36	Ventral Tl10B spn27A (5)	0.000193764	0.149513
183	btsz		Q59DW9	Q59DW9	Ventral Tl10B spn27A (5)	0.250617	0.177826
642	Hcs		A0A0B4KF92	A0A0B4KF92	Ventral Tl10B spn27A (5)	-0.399523	-0.414759
819	bon		A8WHL4	A8WHL4	Ventral Tl10B spn27A (5)	0.399343	0.309886
911	puf	Ubiquitin carboxyl-terminal hydrolase	A0A0B4LIK5	A0A0B4LIK5	Ventral Tl10B spn27A (5)	-0.803101	-0.874941
1097	Pal1		A0A0B4LF14	A0A0B4LF14	Ventral Tl10B spn27A (5)	-0.420164	-0.438771
1194	dom	Helicase domino	Q8MLW2	Q8MLW2	Ventral Tl10B spn27A (5)	0.199872	0.566695
1293			A0A0B4LH25	A0A0B4LH25	Ventral Tl10B spn27A (5)	-0.313146	-0.343831
1571	CG33964-RA		A1Z8U7	A1Z8U7	Ventral Tl10B spn27A (5)	0.256305	0.231163
2405			B7Z0I8	B7Z0I8	Ventral Tl10B spn27A (5)	0.114347	-0.0196985
3167	spen	Protein split ends	M9NCM6	M9NCM6	Ventral Tl10B spn27A (5)	-0.468233	-0.502927
3632	numb	Protein numb	M9PCN6	M9PCN6	Ventral Tl10B spn27A (5)	-0.392163	-0.380082
3753	Eip63E		Q7KM04	Q7KM04	Ventral Tl10B spn27A (5)	-0.378529	-0.396447
4708	eIF-2beta	Eukaryotic translation initiation factor 2 subunit 2	P41375	P41375	Ventral Tl10B spn27A (5)	-0.290451	-0.340271
4924	eIF2B-delta		Q0E8X6	Q0E8X6	Ventral Tl10B spn27A (5)	-0.537363	-0.535043
5073	betaTub56D	Tubulin beta-1 chain	Q24560	Q24560	Ventral Tl10B spn27A (5)	0.149928	0.527253
5387	UbcE2H		Q7JW03	Q7JW03	Ventral Tl10B spn27A (5)	0.207155	0.327033
5641	wde		Q7KMH9	Q7KMH9	Ventral Tl10B spn27A (5)	0.237193	0.154718
5728	CG1646	Pre-mRNA-processing factor 39	Q7KRW8	Q7KRW8	Ventral Tl10B spn27A (5)	0.0122219	0.0159533
5835	smid		Q7KU82	Q7KU82	Ventral Tl10B spn27A (5)	-0.402472	-0.401983
6177	sle	Protein slender lobes	Q8INM3	Q8INM3	Ventral Tl10B spn27A (5)	0.265393	0.435933
6502			Q8MT78	Q8MT78	Ventral Tl10B spn27A (5)	-0.72391	-0.656692
7412	Npl4	Nuclear protein localization protein 4 homolog	Q9VBP9	Q9VBP9	Ventral Tl10B spn27A (5)	0.0850651	0.0513112
7706	loco;loco-RC	Regulator of G-protein signaling loco	Q9VCX1	Q9VCX1	Ventral Tl10B spn27A (5)	0.286535	0.298684
7955	CG5608-RA		Q9VG59	Q9VG59	Ventral Tl10B spn27A (5)	-0.835563	-0.911292
8413	Pih1D1		Q9VK58	Q9VK58	Ventral Tl10B spn27A (5)	-0.404388	-0.364918
8551	FKBP59	FK506-binding protein 59	X2J5E8	X2J5E8	Ventral Tl10B spn27A (5)	-0.46729	-0.407266
8918	Zir		Q9VPI9	Q9VPI9	Ventral Tl10B spn27A (5)	-0.414335	-0.430456
9280			Q9VT61	Q9VT61	Ventral Tl10B spn27A (5)	0.299734	0.124344
9437	Abp1	Drebrin-like protein	Q9VU84	Q9VU84	Ventral Tl10B spn27A (5)	-0.420162	-0.410581
9530			Q9VUR2	Q9VUR2	Ventral Tl10B spn27A (5)	0.0420925	0.0928391
9717	CG14215	Protein ELYS homolog	X2JG50	X2JG50	Ventral Tl10B spn27A (5)	0.123694	0.109952
9976	Pdcd4		Q9VY91	Q9VY91	Ventral Tl10B spn27A (5)	0.310991	0.221355
10242			Q9W0A9	Q9W0A9	Ventral Tl10B spn27A (5)	-0.356272	-0.368666
11125	Apc2		Q9Y1T2	Q9Y1T2	Ventral Tl10B spn27A (5)	-0.398982	-0.388749
11599	CG33964-RA		A1Z8U7	A1Z8U7	Ventral Tl10B spn27A (5)	0.256305	0.231163
12114	east		Q7KW02	Q7KW02	Ventral Tl10B spn27A (5)	0.373968	0.27403
12407	CG5721	Armadillo repeat-containing protein 6 homolog	Q7K486	Q7K486	Ventral Tl10B spn27A (5)	-0.430698	-0.386452
12559	pbl		Q8IQ95	Q8IQ95	Ventral Tl10B spn27A (5)	-0.500536	-0.53046
13003	slam		Q9VME5	Q9VME5	Ventral Tl10B spn27A (5)	-0.565044	-0.543408
13311	CG15014	THUMP domain-containing protein 1 homolog	Q9VZD8	Q9VZD8	Ventral Tl10B spn27A (5)	-0.444127	-0.292066
13255	DENR	Density-regulated protein homolog	Q9VX98	Q9VX98	Ventral Tl10B spn27A (5)	0.264298	0.244054
13020	lost		Q9VN21	Q9VN21	Ventral Tl10B spn27A (5)	0.204699	0.232024
12976	Srp54		Q9VL71	Q9VL71	Ventral Tl10B spn27A (5)	-0.479933	-0.508216
12458	smid		Q7KU82	Q7KU82	Ventral Tl10B spn27A (5)	-0.415487	-0.528382
12139	His1:CG33801;His1:CG33807;His1:CG33834;His1:CG33861;His1	Histone H1	Q4ABE3	Q4ABE3	Ventral Tl10B spn27A (5)	0.458464	0.274409
11583			A1Z6Z7	A1Z6Z7	Ventral Tl10B spn27A (5)	-0.541772	-0.544414
10443			Q9W2I2	Q9W2I2	Ventral Tl10B spn27A (5)	-0.558851	-0.536803
10227	Mfap1		Q9W062	Q9W062	Ventral Tl10B spn27A (5)	0.334235	0.383926
9718	CG14215	Protein ELYS homolog	X2JG50	X2JG50	Ventral Tl10B spn27A (5)	0.224553	0.204521
9607			Q9VVC9	Q9VVC9	Ventral Tl10B spn27A (5)	0.331265	0.229106
9542	Pgm	Phosphoglucomutase	Q9VUY9	Q9VUY9	Ventral Tl10B spn27A (5)	0.265401	0.22566
9529			Q9VUR2	Q9VUR2	Ventral Tl10B spn27A (5)	-0.675979	-0.583753
9358	nst		Q9VTZ4	Q9VTZ4	Ventral Tl10B spn27A (5)	0.297405	0.255808
9201	mus301		Q9VSE2	Q9VSE2	Ventral Tl10B spn27A (5)	0.195366	0.143511
8731	cno		Q9VN82	Q9VN82	Ventral Tl10B spn27A (5)	0.299532	0.262644
8511	eEF1delta	Probable elongation factor 1-delta	Q9VL18	Q9VL18	Ventral Tl10B spn27A (5)	0.26989	0.174912
7814			Q9VE54	Q9VE54	Ventral Tl10B spn27A (5)	0.270164	0.902367
6745			Q95RX5	Q95RX5	Ventral Tl10B spn27A (5)	-0.507416	-0.476268
6338	CG32251	Claspin homolog	Q8IRB5	Q8IRB5	Ventral Tl10B spn27A (5)	-0.745422	-0.733627
6081	Mat89Ba	Nucleolar protein 6	Q8IH00	Q8IH00	Ventral Tl10B spn27A (5)	0.254864	2.20794
5830	smid		Q7KU82	Q7KU82	Ventral Tl10B spn27A (5)	-0.388285	-0.49848
5696	CG11148	PERQ amino acid-rich with GYF domain-containing protein CG11148	Q7KQM6	Q7KQM6	Ventral Tl10B spn27A (5)	-0.34675	-0.407327
5639	wde		Q7KMH9	Q7KMH9	Ventral Tl10B spn27A (5)	0.312013	0.305756
5235	scaf6		Q59E33	Q59E33	Ventral Tl10B spn27A (5)	-0.288101	-0.317908
4965	Cnx99A		Q0KHZ9	Q0KHZ9	Ventral Tl10B spn27A (5)	-0.0418837	0.0439777
4799	Sod	Superoxide dismutase [Cu-Zn]	P61851	P61851	Ventral Tl10B spn27A (5)	0.321394	0.272203
4635	lds	Transcription termination factor 2	P34739	P34739	Ventral Tl10B spn27A (5)	0.319199	0.229228
3907	Nopp140		M9PFZ1;Q7KTV5	Q7KTV5	Ventral Tl10B spn27A (5)	0.401084	0.197477
3716	cact	NF-kappa-B inhibitor cactus	M9PD95	M9PD95	Ventral Tl10B spn27A (5)	0.227782	0.241587
2987	Spn		M9NDX8	M9NDX8	Ventral Tl10B spn27A (5)	-0.350675	-0.398329
1827			A2VEG3	A2VEG3	Ventral Tl10B spn27A (5)	0.364637	0.32478
1572	CG8490-RB		A1Z8X0	A1Z8X0	Ventral Tl10B spn27A (5)	0.36771	0.338815
1570	CG33964-RA		A1Z8U7	A1Z8U7	Ventral Tl10B spn27A (5)	0.300254	0.288065
1355	flfl	Serine/threonine-protein phosphatase 4 regulatory subunit 3	A0A0C4DHE6	A0A0C4DHE6	Ventral Tl10B spn27A (5)	-0.527807	-0.626727
1220	Gp150		A0A0B4LGB0	A0A0B4LGB0	Ventral Tl10B spn27A (5)	-0.0399157	0.00854742
1098	Pal1		A0A0B4LF14	A0A0B4LF14	Ventral Tl10B spn27A (5)	0.188072	0.198978
975	dan	Protein distal antenna	A0A0B4KHU6	A0A0B4KHU6	Ventral Tl10B spn27A (5)	0.292311	0.246184
904	puf	Ubiquitin carboxyl-terminal hydrolase	A0A0B4LIK5	A0A0B4LIK5	Ventral Tl10B spn27A (5)	-0.368253	-0.518625
652	CG15187		A0A0B4KFB8	A0A0B4KFB8	Ventral Tl10B spn27A (5)	0.268996	0.242289
236	pps		Q9VG78	Q9VG78	Ventral Tl10B spn27A (5)	0.228429	0.279813
169	mtd		Q9VNA1;Q8MSQ5	Q9VNA1	Ventral Tl10B spn27A (5)	-1.01422	-0.997169
5795	fu12	1-acyl-sn-glycerol-3-phosphate acyltransferase	Q7KTI0	Q7KTI0	Ventral Tl10B spn27A (5)	-0.21499	-0.447675
2728	Su(var)3-7	Protein suppressor of variegation 3-7	E1JIJ9	E1JIJ9	Ventral Tl10B spn27A (5)	-0.225206	-0.389902
9659	CG9231	UPF0389 protein CG9231	X2JGV8	X2JGV8	Ventral Tl10B spn27A (5)	-0.382691	-0.516506
5130	RhoGAP1A		Q29QE1;X2JC00	Q29QE1	Ventral Tl10B spn27A (5)	-0.138924	-0.217371
2252	kis		B7Z002	B7Z002	Ventral Tl10B spn27A (5)	-0.106478	-0.0828628
2093	Rnp4F	RNA-binding protein 4F	A8JUY0	A8JUY0	Ventral Tl10B spn27A (5)	0.603799	0.10891
10636	CG1677-RA		X2JE07	X2JE07	Ventral Tl10B spn27A (5)	-0.112363	-0.0214547
8496	holn1	CD2 antigen cytoplasmic tail-binding protein 2 homolog	Q9VKV5	Q9VKV5	Ventral Tl10B spn27A (5)	-0.364328	-0.158919
8089			Q9VHC8	Q9VHC8	Ventral Tl10B spn27A (5)	-0.731461	-0.516238
3250	eIF5B		M9ND37	M9ND37	Ventral Tl10B spn27A (5)	-0.49032	0.0907885
402	RhoGEF2		A0A0B4LFF8	A0A0B4LFF8	Dorsal + Lateral (6)	1.4792	1.47883
7918	E5		Q9VFQ3	Q9VFQ3	Dorsal + Lateral (6)	2.36645	2.35968
8278	Acn		Q9VJ12	Q9VJ12	Dorsal + Lateral (6)	NaN	0.52876
8363	l(2)35Bd	mRNA cap guanine-N7 methyltransferase	Q9VJQ4	Q9VJQ4	Dorsal + Lateral (6)	0.0522786	0.0795345
4470	fs(1)K10	DNA-binding protein K10	P13468	P13468	Dorsal + Lateral (6)	0.239407	0.305615
4111			M9PIC3	M9PIC3	Dorsal + Lateral (6)	0.556926	0.52639
3006	spo	Cytochrome P450 307a1	H8F4V5	H8F4V5	Dorsal + Lateral (6)	0.0105077	-0.000759967
5007	RpS5a	40S ribosomal protein S5a	X2JKU5	X2JKU5	Dorsal + Lateral (6)	0.0336501	0.0436778
4615	bnb	Protein bangles and beads	P29746	P29746	Dorsal + Lateral (6)	0.993325	NaN
2436			B7Z0I8	B7Z0I8	Dorsal + Lateral (6)	0.55198	0.524687
370	mod	DNA-binding protein modulo	A0A0B4K7G4	A0A0B4K7G4	Dorsal + Lateral (6)	0.693363	0.663122
954	CG4449-RA;CG4449	Uncharacterized protein CG4449	A0A0B4KHP8	A0A0B4KHP8	Dorsal + Lateral (6)	0.606503	0.459198
7441	Nup358		Q9VBU7	Q9VBU7	Dorsal + Lateral (6)	0.767904	NaN
7507	asp	Protein abnormal spindle	Q9VC45	Q9VC45	Dorsal + Lateral (6)	0.683205	0.612115
10927	mre11		Q9XYZ4	Q9XYZ4	Dorsal + Lateral (6)	0.687417	0.651275
12168	wdn	Serendipity locus protein H-1	P15619	P15619	Dorsal + Lateral (6)	1.13764	1.09192
13070	mbm		Q9VPM5	Q9VPM5	Dorsal + Lateral (6)	0.344191	0.25819
13071	mbm		Q9VPM5	Q9VPM5	Dorsal + Lateral (6)	0.366687	0.301483
13266			Q9VXW2	Q9VXW2	Dorsal + Lateral (6)	0.558267	0.415556
13156	SmD1	Probable small nuclear ribonucleoprotein Sm D1	Q9VU02	Q9VU02	Dorsal + Lateral (6)	0.635964	0.558753
2182	slik		B7YZQ1	B7YZQ1	Dorsal + Lateral (6)	0.418208	0.31183
2996	Spn		M9NDX8	M9NDX8	Dorsal + Lateral (6)	0.393518	0.374413
3340	Ctr1A		M9NE97	M9NE97	Dorsal + Lateral (6)	0.394897	NaN
3359	CanA-14F	Serine/threonine-protein phosphatase;Serine/threonine-protein phosphatase 2B catalytic subunit 3	M9NEL1	M9NEL1	Dorsal + Lateral (6)	0.44426	0.364665
1650	Su(var)2-HP2		A1Z9S6	A1Z9S6	Dorsal + Lateral (6)	NaN	0.155286
11008	Rif1		Q9XZ34	Q9XZ34	Dorsal + Lateral (6)	0.56276	0.513351
2134	pod1	Coronin	Q9W3W1	Q9W3W1	Dorsal + Lateral (6)	0.315478	0.313057
3246	eIF5B		M9ND37	M9ND37	Dorsal + Lateral (6)	0.328401	0.346602
3873	Nopp140		M9PFZ1;Q7KTV5	Q7KTV5	Dorsal + Lateral (6)	0.708664	NaN
9429	cmb		Q9VU76	Q9VU76	Dorsal + Lateral (6)	1.01464	1.05178
10548	mxc		Q9W363	Q9W363	Dorsal + Lateral (6)	0.271414	NaN
56	tacc		A0A0B4JCV4	A0A0B4JCV4	Dorsal + Lateral (6)	-0.353328	-0.400345
67	tacc		A0A0B4JCV4	A0A0B4JCV4	Dorsal + Lateral (6)	0.597116	0.582342
206	pr-set7	Histone-lysine N-methyltransferase pr-set7	A0A0B4K680	A0A0B4K680	Dorsal + Lateral (6)	-0.373914	-0.411039
235	cic	Putative transcription factor capicua	A0A0B4K6D6	A0A0B4K6D6	Dorsal + Lateral (6)	-0.109965	-0.179974
296	lig;lig-RA	Protein lingerer	A0A126GUM8	A0A126GUM8	Dorsal + Lateral (6)	-0.439619	-0.439776
440	larp	La-related protein 1	A0A0B4K7Y7	A0A0B4K7Y7	Dorsal + Lateral (6)	-0.146526	-0.138585
484	cnn	Centrosomin	A0A0B4K863	A0A0B4K863	Dorsal + Lateral (6)	0.40103	0.445336
872			Q9VC89	Q9VC89	Dorsal + Lateral (6)	-0.149272	-0.156908
955	CG4449-RA;CG4449	Uncharacterized protein CG4449	A0A0B4KHP8	A0A0B4KHP8	Dorsal + Lateral (6)	-0.120992	-0.120619
958	CG4449-RA;CG4449	Uncharacterized protein CG4449	A0A0B4KHP8	A0A0B4KHP8	Dorsal + Lateral (6)	0.608321	0.548254
1117	Inr-a		A0A0B4LFF9	A0A0B4LFF9	Dorsal + Lateral (6)	0.552428	0.554386
1153	CG8370	Transmembrane protein 131 homolog	A0A0B4LFJ4	A0A0B4LFJ4	Dorsal + Lateral (6)	-0.214794	-0.239846
1180	MESR4		A0A0B4LGV3	A0A0B4LGV3	Dorsal + Lateral (6)	0.328416	0.303315
1302	CG7218	Protein TAPT1 homolog	A0A0B4LH99	A0A0B4LH99	Dorsal + Lateral (6)	-0.33878	-0.33756
1348	jing	Zinc finger protein jing	A0A0C4DHC2	A0A0C4DHC2	Dorsal + Lateral (6)	-0.175912	-0.091743
1457	vlc		A1Z6H4	A1Z6H4	Dorsal + Lateral (6)	-0.291509	-0.261127
1713	RhoGAP54D		A1ZAW3	A1ZAW3	Dorsal + Lateral (6)	0.533999	0.519623
1935	Klp10A	Kinesin-like protein;Kinesin-like protein Klp10A	A4V4A1	A4V4A1	Dorsal + Lateral (6)	0.836367	0.778825
2014	kst		M9PBL6	M9PBL6	Dorsal + Lateral (6)	-0.296729	-0.344398
2350	Unr		B7Z0E2	B7Z0E2	Dorsal + Lateral (6)	-0.287931	-0.244095
2553	Psc-RA;Psc	Polycomb group protein Psc	D0Z760	D0Z760	Dorsal + Lateral (6)	-0.0582148	-0.0704884
2682	Mi-2	Chromodomain-helicase-DNA-binding protein Mi-2 homolog	M9PIA6	M9PIA6	Dorsal + Lateral (6)	-0.400457	-0.335692
2819	RhoGAP19D		E1JJS2	E1JJS2	Dorsal + Lateral (6)	0.133387	NaN
2931	PGRP-LD-RB;Pmi	Transmembrane protein 11 homolog, mitochondrial	G4LTX1	G4LTX1	Dorsal + Lateral (6)	0.320664	0.299857
3112	su(w[a])	Protein suppressor of white apricot	M9MS02	M9MS02	Dorsal + Lateral (6)	-0.221583	-0.159377
3220	l(2)gl	Lethal(2) giant larvae protein	M9NCX1	M9NCX1	Dorsal + Lateral (6)	-0.250868	-0.281244
3353	rudhira	Breast carcinoma-amplified sequence 3 homolog	M9NED8	M9NED8	Dorsal + Lateral (6)	-0.236435	-0.227063
3360	CanA-14F	Serine/threonine-protein phosphatase;Serine/threonine-protein phosphatase 2B catalytic subunit 3	M9NEL1	M9NEL1	Dorsal + Lateral (6)	0.517173	0.527871
3407	Ubr1;UBR1	E3 ubiquitin-protein ligase UBR1	M9NFA7	M9NFA7	Dorsal + Lateral (6)	-0.275018	-0.305412
3638	chico	Insulin receptor substrate 1	M9PCQ8	M9PCQ8	Dorsal + Lateral (6)	0.545365	0.590103
3808	Klc	Kinesin light chain	M9PF24	M9PF24	Dorsal + Lateral (6)	-0.259221	-0.225311
3815	RpL13	60S ribosomal protein L13	M9PFF0	M9PFF0	Dorsal + Lateral (6)	1.29035	1.27148
4181	Df31		O16043	O16043	Dorsal + Lateral (6)	0.326868	0.340875
4255	EG:25E8.1		O46067	O46067	Dorsal + Lateral (6)	-0.0949125	-0.076428
4303	crm	Protein cramped	O76906	O76906	Dorsal + Lateral (6)	-0.0510896	-0.0883695
4345	Hsp27	Heat shock protein 27	X2JC82	X2JC82	Dorsal + Lateral (6)	1.28456	1.25799
4352	Yp1	Vitellogenin-1	X2JD55	X2JD55	Dorsal + Lateral (6)	-0.257035	-0.272637
4464	term	Protein terminus	P11455	P11455	Dorsal + Lateral (6)	-0.19888	-0.203832
4557	me31B	Putative ATP-dependent RNA helicase me31b	P23128	P23128	Dorsal + Lateral (6)	-0.174503	-0.173281
4706	eIF-2alpha	Eukaryotic translation initiation factor 2 subunit 1	X2JFR6	X2JFR6	Dorsal + Lateral (6)	-0.119063	-0.116834
4795	CdsA	Phosphatidate cytidylyltransferase;Phosphatidate cytidylyltransferase, photoreceptor-specific	X2JC55	X2JC55	Dorsal + Lateral (6)	0.834817	0.851964
4875	TfIIFalpha	General transcription factor IIF subunit 1	Q05913	Q05913	Dorsal + Lateral (6)	1.24938	1.27997
4977	mtrm	Protein matrimony	Q23973	Q23973	Dorsal + Lateral (6)	0.0440699	0.0240662
5034	l(2)dtl	Protein lethal(2)denticleless	Q24371	Q24371	Dorsal + Lateral (6)	0.550959	0.515904
5127	Trf	TBP-related factor	Q27896	Q27896	Dorsal + Lateral (6)	NaN	-0.299154
5168	egg	Histone-lysine N-methyltransferase eggless	Q32KD2	Q32KD2	Dorsal + Lateral (6)	-0.0846929	-0.0818674
5292			Q6IHY4	Q6IHY4	Dorsal + Lateral (6)	-0.218804	-0.248709
5424	Sec61beta		Q7JZN0	Q7JZN0	Dorsal + Lateral (6)	-0.18903	-0.175544
5653	BcDNA.LD23371		Q7KMI3	Q7KMI3	Dorsal + Lateral (6)	-0.0904641	-0.0958582
5762	Sbf		Q7KSP6	Q7KSP6	Dorsal + Lateral (6)	0.449138	0.441848
6028	Akap200		Q9VLL3	Q9VLL3	Dorsal + Lateral (6)	0.682859	0.758044
6167	sle;CG12592	Protein slender lobes;Slender lobes-like protein	Q8INM3	Q8INM3	Dorsal + Lateral (6)	-0.32427	-0.309771
6331			Q8IR33	Q8IR33	Dorsal + Lateral (6)	-0.182512	NaN
6404	kcc		Q8MLQ5	Q8MLQ5	Dorsal + Lateral (6)	-0.198266	-0.17046
6457			Q8MRI4	Q8MRI4	Dorsal + Lateral (6)	-0.275778	-0.195449
6570	Mgstl		Q8SY19	Q8SY19	Dorsal + Lateral (6)	0.315656	0.339402
6734	pita		Q9W1N1	Q9W1N1	Dorsal + Lateral (6)	NaN	-0.181067
6854	mbo	Nuclear pore complex protein Nup88	Q9GYU8	Q9GYU8	Dorsal + Lateral (6)	0.540369	0.527754
6942	spag		Q9V3E9	Q9V3E9	Dorsal + Lateral (6)	0.450101	0.463006
7299	CG11882-RA		Q9VAN8	Q9VAN8	Dorsal + Lateral (6)	-0.121374	-0.118655
7415	Nup358		Q9VBU7	Q9VBU7	Dorsal + Lateral (6)	-0.23366	-0.235007
7440	Nup358		Q9VBU7	Q9VBU7	Dorsal + Lateral (6)	0.538142	0.569732
7751	ppan	Protein Peter pan	Q9VDE5	Q9VDE5	Dorsal + Lateral (6)	-0.409942	-0.336725
7922	rin		Q9VFT4	Q9VFT4	Dorsal + Lateral (6)	-0.232031	-0.203285
7990	Blm	Bloom syndrome protein homolog	Q9VGI8	Q9VGI8	Dorsal + Lateral (6)	0.527315	0.543897
8013			Q9VGL0	Q9VGL0	Dorsal + Lateral (6)	-0.263547	-0.235871
8106	E(var)3-9		Q9VHJ3	Q9VHJ3	Dorsal + Lateral (6)	NaN	-0.145432
8205			Q9VID9	Q9VID9	Dorsal + Lateral (6)	-0.246913	-0.231621
8466	Ge-1	Enhancer of mRNA-decapping protein 4 homolog	Q9VKK1	Q9VKK1	Dorsal + Lateral (6)	0.420391	0.465568
8657	slam		Q9VME5	Q9VME5	Dorsal + Lateral (6)	-0.00390202	-0.0153751
9126	l(3)psg2		Q9VRM6	Q9VRM6	Dorsal + Lateral (6)	0.966663	0.958613
9129	Eaf6		Q9VRN3	Q9VRN3	Dorsal + Lateral (6)	NaN	-0.00303376
9229			Q9VSW7	Q9VSW7	Dorsal + Lateral (6)	1.69778	1.71893
9322	RIOK1	Serine/threonine-protein kinase RIO1	Q9VTL5	Q9VTL5	Dorsal + Lateral (6)	0.607518	0.649463
9440	Liprin-beta		Q9VU88	Q9VU88	Dorsal + Lateral (6)	0.395518	0.451616
9519	dop		Q9VUQ9	Q9VUQ9	Dorsal + Lateral (6)	NaN	-0.0468282
9769			X2JFQ1	X2JFQ1	Dorsal + Lateral (6)	-0.261743	-0.200374
9860	wus		Q9VX95	Q9VX95	Dorsal + Lateral (6)	0.669534	0.680933
9939	Grip128		Q9VXU8	Q9VXU8	Dorsal + Lateral (6)	-0.282859	-0.297756
9956	pdgy		Q9VXZ8	Q9VXZ8	Dorsal + Lateral (6)	NaN	-0.0934768
9997			Q9VYA4	Q9VYA4	Dorsal + Lateral (6)	-0.343074	-0.353493
10083			Q9VYW4	Q9VYW4	Dorsal + Lateral (6)	0.373723	0.380878
10250	l(3)02640		Q9W0G4	Q9W0G4	Dorsal + Lateral (6)	0.926559	0.882348
10372	egl		Q9W1K4	Q9W1K4	Dorsal + Lateral (6)	-0.118877	-0.104052
10529	l(1)G0320		Q9W335	Q9W335	Dorsal + Lateral (6)	-0.0807443	-0.0326828
10655	CG1677-RA		X2JE07	X2JE07	Dorsal + Lateral (6)	-0.103016	-0.109074
10747	raptor		Q9W437	Q9W437	Dorsal + Lateral (6)	-0.212086	-0.242204
10773	Usp16-45	Ubiquitin carboxyl-terminal hydrolase	Q9W4C3	Q9W4C3	Dorsal + Lateral (6)	-0.278105	-0.30584
10860	mip130		Q9W542	Q9W542	Dorsal + Lateral (6)	-0.3497	-0.341766
10971	snama		Q9XZ21	Q9XZ21	Dorsal + Lateral (6)	0.304617	0.366054
11060	BcDNA.GH10229		Q9Y114	Q9Y114	Dorsal + Lateral (6)	-0.192646	-0.183962
11261	l(1)G0196	Inositol hexakisphosphate and diphosphoinositol-pentakisphosphate kinase	X2JEN2	X2JEN2	Dorsal + Lateral (6)	0.917315	0.910602
11592	Caf1-105		A1Z898	A1Z898	Dorsal + Lateral (6)	0.327918	0.394546
11856	ens		Q8IRC1	Q8IRC1	Dorsal + Lateral (6)	0.429224	0.478615
12119	east		Q7KW02	Q7KW02	Dorsal + Lateral (6)	-0.239358	-0.259622
12320	Trf	TBP-related factor	Q27896	Q27896	Dorsal + Lateral (6)	NaN	-0.299154
12403	Nup44A		Q7K2X8	Q7K2X8	Dorsal + Lateral (6)	-0.0855325	-0.0700769
12637	vig2		Q960D3	Q960D3	Dorsal + Lateral (6)	-0.0964715	-0.116887
12799	eIF4G2		Q9VCH1	Q9VCH1	Dorsal + Lateral (6)	NaN	-0.247652
12875	Art1		Q9VGW7	Q9VGW7	Dorsal + Lateral (6)	-0.392181	-0.321184
12992	nop5		Q9VM69	Q9VM69	Dorsal + Lateral (6)	0.786596	0.77953
13119	scny	Ubiquitin carboxyl-terminal hydrolase 36	Q9VRP5	Q9VRP5	Dorsal + Lateral (6)	-0.0357758	-0.0413326
13124			Q9VRV1	Q9VRV1	Dorsal + Lateral (6)	1.14147	1.14642
13219	parvin		Q9VWD0	Q9VWD0	Dorsal + Lateral (6)	-0.406173	-0.40298
13458	snama		Q9XZ21	Q9XZ21	Dorsal + Lateral (6)	0.662528	0.632879
13563	Pi3K92E		P91634	P91634	Dorsal + Lateral (6)	0.540411	0.521044
13475	NELF-B	Negative elongation factor B	Q9Y113	Q9Y113	Dorsal + Lateral (6)	-0.17524	-0.16204
13346	DCP1		Q9W1H5	Q9W1H5	Dorsal + Lateral (6)	-0.0745614	NaN
13170	Liprin-beta		Q9VU88	Q9VU88	Dorsal + Lateral (6)	0.395518	0.451616
13120	scny	Ubiquitin carboxyl-terminal hydrolase 36	Q9VRP5	Q9VRP5	Dorsal + Lateral (6)	-0.0357758	-0.0413326
13113	l(3)psg2		Q9VRM6	Q9VRM6	Dorsal + Lateral (6)	0.598129	0.61326
12912			Q9VID9	Q9VID9	Dorsal + Lateral (6)	1.01446	1.04666
12836	Ino80	Putative DNA helicase Ino80	Q9VDY1	Q9VDY1	Dorsal + Lateral (6)	-0.169034	-0.177211
12692	EndoGI		Q9V3V9	Q9V3V9	Dorsal + Lateral (6)	-0.211515	-0.153317
12501	Chro		Q86BS3	Q86BS3	Dorsal + Lateral (6)	NaN	-0.29726
12359			Q7JQU9	Q7JQU9	Dorsal + Lateral (6)	-0.13092	-0.119319
12204	Gnf1	Replication factor C subunit 1	P35600	P35600	Dorsal + Lateral (6)	0.936653	0.958853
11937	Lam	Lamin Dm0	M9NE89	M9NE89	Dorsal + Lateral (6)	0.428915	0.491909
11859	sqh	Myosin regulatory light chain sqh	F6J1D0	F6J1D0	Dorsal + Lateral (6)	0.554881	0.522059
11487	CG4449-RA;CG4449	Uncharacterized protein CG4449	A0A0B4KHP8	A0A0B4KHP8	Dorsal + Lateral (6)	NaN	0.647438
11071	Pol32		Q9Y118	Q9Y118	Dorsal + Lateral (6)	0.573541	0.596346
11059	BcDNA.GH10229		Q9Y114	Q9Y114	Dorsal + Lateral (6)	-0.306818	-0.307194
10941	Nup93-1		Q9XZ06	Q9XZ06	Dorsal + Lateral (6)	NaN	0.563157
10855	eIF2B-epsilon		Q9W541	Q9W541	Dorsal + Lateral (6)	0.727543	0.726348
10756	GAA1		Q9W464	Q9W464	Dorsal + Lateral (6)	0.675257	0.678894
10594	Crag		Q9W3D2	Q9W3D2	Dorsal + Lateral (6)	0.379968	0.338256
10294	Fcp1		Q9W147	Q9W147	Dorsal + Lateral (6)	-0.113454	-0.170255
10081			Q9VYW4	Q9VYW4	Dorsal + Lateral (6)	-0.300596	-0.336011
9985	mus101		Q9VY97	Q9VY97	Dorsal + Lateral (6)	-0.168943	NaN
9943			Q9VXW2	Q9VXW2	Dorsal + Lateral (6)	-0.204744	-0.293169
9828	CG32549-RF		Q9VWV2	Q9VWV2	Dorsal + Lateral (6)	-0.322776	-0.354333
9768			X2JFQ1	X2JFQ1	Dorsal + Lateral (6)	-0.301649	-0.282646
9460	endos		Q9VUB8	Q9VUB8	Dorsal + Lateral (6)	0.331594	0.373689
9417	SRm160		Q9VU43	Q9VU43	Dorsal + Lateral (6)	-0.155544	-0.155954
9256			Q9VT61	Q9VT61	Dorsal + Lateral (6)	0.557676	0.601217
9196			Q9VSC5	Q9VSC5	Dorsal + Lateral (6)	-0.22704	-0.197264
9127	l(3)psg2		Q9VRM6	Q9VRM6	Dorsal + Lateral (6)	0.917459	0.921259
8661	slam		Q9VME5	Q9VME5	Dorsal + Lateral (6)	-0.096521	-0.0406723
8563	borr	Borealin	Q9VLD6	Q9VLD6	Dorsal + Lateral (6)	-0.287068	-0.264668
8206			Q9VID9	Q9VID9	Dorsal + Lateral (6)	-0.246913	-0.223665
8085			Q9VHC8	Q9VHC8	Dorsal + Lateral (6)	-0.162295	-0.100087
8004	Ho		Q9VGJ9	Q9VGJ9	Dorsal + Lateral (6)	-0.194485	-0.214542
7937			Q9VG01	Q9VG01	Dorsal + Lateral (6)	0.532279	0.605915
7826	Rpb4	DNA-directed RNA polymerase II 16 kDa polypeptide	Q9VEA5	Q9VEA5	Dorsal + Lateral (6)	NaN	-0.0170985
7669	eIF-3p66	Eukaryotic translation initiation factor 3 subunit D-1	Q9VCK0	Q9VCK0	Dorsal + Lateral (6)	-0.194565	-0.206841
7533			Q9VC60	Q9VC60	Dorsal + Lateral (6)	0.501695	0.485595
7435	Nup358		Q9VBU7	Q9VBU7	Dorsal + Lateral (6)	-0.432696	-0.404723
7400	RpL27	60S ribosomal protein L27	Q9VBN5	Q9VBN5	Dorsal + Lateral (6)	0.6559	0.682468
7156	scra	Actin-binding protein anillin	Q9V4P1	Q9V4P1	Dorsal + Lateral (6)	-0.278698	-0.24161
6878	CG11505	La-related protein CG11505	Q9I7T7	Q9I7T7	Dorsal + Lateral (6)	-0.305302	-0.267296
6844	stai		Q9GQR5	Q9GQR5	Dorsal + Lateral (6)	-0.134025	-0.166466
6458			Q8MRI4	Q8MRI4	Dorsal + Lateral (6)	-0.35947	-0.279141
6454			Q8MRI4	Q8MRI4	Dorsal + Lateral (6)	-0.134492	-0.125738
6400	trr	Histone-lysine N-methyltransferase trr	Q8IRW8	Q8IRW8	Dorsal + Lateral (6)	-0.22394	-0.173229
6265	dikar		Q8IQ71	Q8IQ71	Dorsal + Lateral (6)	NaN	-0.23276
5831	smid		Q7KU82	Q7KU82	Dorsal + Lateral (6)	NaN	-0.203074
5742	Pk92B		Q7KSB7	Q7KSB7	Dorsal + Lateral (6)	-0.184162	-0.185741
5719			Q8IMG3	Q8IMG3	Dorsal + Lateral (6)	-0.295434	-0.284063
5525			Q7K3D4	Q7K3D4	Dorsal + Lateral (6)	-0.259679	-0.257321
5415			Q7JZ37	Q7JZ37	Dorsal + Lateral (6)	-0.22306	-0.19452
5282			Q5U0X8	Q5U0X8	Dorsal + Lateral (6)	1.1181	1.09476
5152	RhoGAP1A		Q29QE1;X2JC00	Q29QE1	Dorsal + Lateral (6)	0.315027	0.381847
5075	Caf1	Probable histone-binding protein Caf1	Q24572	Q24572	Dorsal + Lateral (6)	NaN	-0.212181
5006	hk	Protein hook	Q24185	Q24185	Dorsal + Lateral (6)	-0.0254836	-0.0310388
4911	MEP-1		Q0E8J0	Q0E8J0	Dorsal + Lateral (6)	-0.200317	-0.186841
4809	Stim	Stromal interaction molecule homolog	P83094	P83094	Dorsal + Lateral (6)	-0.325926	-0.296458
4756	Taf11	Transcription initiation factor TFIID subunit 11	P49906	P49906	Dorsal + Lateral (6)	-0.142889	-0.0980149
4559	me31B	Putative ATP-dependent RNA helicase me31b	P23128	P23128	Dorsal + Lateral (6)	-0.240902	-0.288814
4493	Top2	DNA topoisomerase 2	P15348	P15348	Dorsal + Lateral (6)	0.321904	0.344494
4405	hb	Protein hunchback	P05084	P05084	Dorsal + Lateral (6)	-0.0744376	-0.0480769
4346	Hsp27	Heat shock protein 27	X2JC82	X2JC82	Dorsal + Lateral (6)	-0.156599	-0.182105
4328	Axs	Anoctamin	O97132	O97132	Dorsal + Lateral (6)	-0.256882	-0.252603
4272	Dbp80	DEAD-box helicase Dbp80	O61305	O61305	Dorsal + Lateral (6)	-0.415169	-0.344055
4230	Parg	Poly(ADP-ribose) glycohydrolase	O46043	O46043	Dorsal + Lateral (6)	3.81887	NaN
3917	Nopp140		M9PFZ1	M9PFZ1	Dorsal + Lateral (6)	0.449784	0.437235
3812	Rcd-1		M9PF85	M9PF85	Dorsal + Lateral (6)	0.318138	0.360418
3789	APP-BP1	Nedd8-activating enzyme E1 regulatory subunit	M9PEU5	M9PEU5	Dorsal + Lateral (6)	-0.238465	-0.259721
3460	Pep	Zinc finger protein on ecdysone puffs	M9NG39	M9NG39	Dorsal + Lateral (6)	-0.198267	-0.175697
3393	nbs	Nibrin	M9NF67	M9NF67	Dorsal + Lateral (6)	-0.335099	-0.364298
3358	CanA-14F	Serine/threonine-protein phosphatase;Serine/threonine-protein phosphatase 2B catalytic subunit 3	M9NEL1	M9NEL1	Dorsal + Lateral (6)	0.396991	0.411944
3267	Mbs		M9NDA1	M9NDA1	Dorsal + Lateral (6)	1.37381	1.39505
3118	Nrt	Neurotactin	M9MS15	M9MS15	Dorsal + Lateral (6)	-0.107712	-0.0836074
3004	Pp2A-29B	Serine/threonine-protein phosphatase PP2A 65 kDa regulatory subunit	M9MQH9	M9MQH9	Dorsal + Lateral (6)	NaN	0.683657
2963	Spn		M9NDX8	M9NDX8	Dorsal + Lateral (6)	-0.378575	-0.320117
2870	tho2		Q9VQ76	Q9VQ76	Dorsal + Lateral (6)	-0.135563	-0.126507
2700			E1JIB9;X2JG79	E1JIB9	Dorsal + Lateral (6)	-0.392336	-0.368977
2680	Mi-2	Chromodomain-helicase-DNA-binding protein Mi-2 homolog	M9PIA6	M9PIA6	Dorsal + Lateral (6)	-0.0173548	-0.0153166
2442			B7Z0I8	B7Z0I8	Dorsal + Lateral (6)	-0.316603	-0.353363
2326	CG7414	Eukaryotic translation initiation factor 2A	B7Z098	B7Z098	Dorsal + Lateral (6)	-0.140095	-0.110357
1876	D1	Chromosomal protein D1	A4V2K7	A4V2K7	Dorsal + Lateral (6)	0.544596	0.543302
1400	CG8223	Protein NASP homolog	A0A126BEE6	A0A126BEE6	Dorsal + Lateral (6)	-0.312035	-0.437271
1326	awd	Nucleoside diphosphate kinase	A0A0B4LJ12	A0A0B4LJ12	Dorsal + Lateral (6)	1.102	1.09517
1223	Ca-P60A	Calcium-transporting ATPase;Calcium-transporting ATPase sarcoplasmic/endoplasmic reticulum type	A0A0B4LGB7	A0A0B4LGB7	Dorsal + Lateral (6)	0.529326	0.557655
1176	Incenp		A0A0B4LFQ2	A0A0B4LFQ2	Dorsal + Lateral (6)	-0.362529	-0.319165
1149	CG8370	Transmembrane protein 131 homolog	A0A0B4LFJ4	A0A0B4LFJ4	Dorsal + Lateral (6)	0.751646	0.808206
983	Gcn2		Q9V9X8	Q9V9X8	Dorsal + Lateral (6)	NaN	0.0584871
956	CG4449-RA;CG4449	Uncharacterized protein CG4449	A0A0B4KHP8	A0A0B4KHP8	Dorsal + Lateral (6)	-0.180988	-0.188822
941	GlyS	Glycogen [starch] synthase	A0A0B4KHJ5	A0A0B4KHJ5	Dorsal + Lateral (6)	-0.0865332	-0.0777584
550	Mlh1		A0A0B4KEM3	A0A0B4KEM3	Dorsal + Lateral (6)	-0.197057	-0.197986
447	Rpn6	26S proteasome non-ATPase regulatory subunit 11	A0A0B4K7Z5	A0A0B4K7Z5	Dorsal + Lateral (6)	-0.288406	-0.287317
410	Kdm4A	Probable lysine-specific demethylase 4A	A0A0B4K7U3	A0A0B4K7U3	Dorsal + Lateral (6)	NaN	1.78244
278	scrib	Protein lap4	A0A0B4KHY2	A0A0B4KHY2	Dorsal + Lateral (6)	-0.198628	-0.185103
219	mod(mdg4)	Modifier of mdg4	A0A0B4K6B8	A0A0B4K6B8	Dorsal + Lateral (6)	-0.161184	-0.167813
68	tacc		A0A0B4JCV4	A0A0B4JCV4	Dorsal + Lateral (6)	0.674002	0.662155
63	tacc		A0A0B4JCV4	A0A0B4JCV4	Dorsal + Lateral (6)	-0.173635	-0.153374
19	CG10341	H/ACA ribonucleoprotein complex non-core subunit NAF1	A0A023GQ99	A0A023GQ99	Dorsal + Lateral (6)	0.487381	0.515713
4539	pAbp	Polyadenylate-binding protein	P21187	P21187	Dorsal + Lateral (6)	NaN	0.413181
3304	BicD	Protein bicaudal D	M9NDR2	M9NDR2	Dorsal + Lateral (6)	NaN	0.640356
12040	Nopp140		M9PFZ1;Q7KTV5	Q7KTV5	Dorsal + Lateral (6)	0.392442	0.495387
11720	Rrp1	Recombination repair protein 1	B7YZZ9	B7YZZ9	Dorsal + Lateral (6)	NaN	3.13531
10805	tyf		Q9W4M7	Q9W4M7	Dorsal + Lateral (6)	NaN	1.93203
10214	ecd	Protein SGT1 homolog ecdysoneless	Q9W032	Q9W032	Dorsal + Lateral (6)	NaN	0.570076
6545	kuk		Q8SX89	Q8SX89	Dorsal + Lateral (6)	0.515667	0.582479
6392	CG2199	Zinc finger protein CG2199	Q8IRH5	Q8IRH5	Dorsal + Lateral (6)	NaN	0.932253
5560	Cct1		Q7K4C7	Q7K4C7	Dorsal + Lateral (6)	NaN	0.719385
746	stumps		A0A0B4KGP0	A0A0B4KGP0	Dorsal + Lateral (6)	0.261082	0.3454
412	Kdm4A	Probable lysine-specific demethylase 4A	A0A0B4K7U3	A0A0B4K7U3	Dorsal + Lateral (6)	0.242842	0.268545
1139			A0A0B4LFE1	A0A0B4LFE1	Dorsal + Ventral Tl10B (7)	0.458351	NaN
13319	Non2		Q9VZY0	Q9VZY0	Dorsal + Ventral Tl10B (7)	0.55927	0.0709215
8651	slam		Q9VME5	Q9VME5	Dorsal + Ventral Tl10B (7)	0.595794	0.243424
6554	Yeti		Q8SXI2	Q8SXI2	Dorsal + Ventral Tl10B (7)	0.28713	0.0466325
4210	Rab1		O18332	O18332	Dorsal + Ventral Tl10B (7)	0.69348	0.334993
4072	dah		M9PHN1	M9PHN1	Dorsal + Ventral Tl10B (7)	0.771434	0.297167
3989	bif		M9PGW8	M9PGW8	Dorsal + Ventral Tl10B (7)	0.590141	0.430739
4173	mof	Males-absent on the first protein	O02193	O02193	Dorsal + Ventral Tl10B (7)	1.05542	0.959869
1795	CG16742	WASH complex subunit FAM21 homolog	A1ZBW7	A1ZBW7	Dorsal + Ventral Tl10B (7)	-0.196877	-0.40897
12979	und	Methionine aminopeptidase 2	Q9VL89	Q9VL89	Dorsal + Ventral Tl10B (7)	-0.0739169	-0.358143
10707			Q9W3Z4	Q9W3Z4	Dorsal + Ventral Tl10B (7)	0.373787	-0.267742
2189	CG31869-RB		B7YZV0	B7YZV0	Dorsal + Ventral Tl10B (7)	-0.0361424	-0.304401
5156	CG12877-RC		Q2PDP6	Q2PDP6	Dorsal + Ventral Tl10B (7)	-0.209277	-0.404541
6426	Eps-15		Q8MMD2	Q8MMD2	Dorsal + Ventral Tl10B (7)	-0.181111	-0.405589
8418			Q9VK59	Q9VK59	Dorsal + Ventral Tl10B (7)	-0.0440224	-0.237682
8554	und	Methionine aminopeptidase 2	Q9VL89	Q9VL89	Dorsal + Ventral Tl10B (7)	0.00874432	-0.280635
8627	Tango1	Transport and Golgi organization protein 1	X2J786	X2J786	Dorsal + Ventral Tl10B (7)	-0.0753684	-0.354565
9288			Q9VTC1	Q9VTC1	Dorsal + Ventral Tl10B (7)	-0.227321	-0.508244
8662	slam		Q9VME5	Q9VME5	Dorsal + Ventral Tl10B (7)	-0.307175	-0.540928
8041	Snap24;Snap25	Synaptosomal-associated protein;Synaptosomal-associated protein 25	Q9VH76	Q9VH76	Dorsal + Ventral Tl10B (7)	0.464181	0.416577
7874			Q9VEV3	Q9VEV3	Dorsal + Ventral Tl10B (7)	0.258431	0.174014
7718	RpI12	DNA-directed RNA polymerase subunit	Q9VD81	Q9VD81	Dorsal + Ventral Tl10B (7)	-0.314736	-0.362059
7487	polybromo		Q9VC36	Q9VC36	Dorsal + Ventral Tl10B (7)	-0.181908	-0.252836
7219			Q9V9U3	Q9V9U3	Dorsal + Ventral Tl10B (7)	0.439891	0.361165
7180	CG8858	Proteasome-associated protein ECM29 homolog	Q9V677	Q9V677	Dorsal + Ventral Tl10B (7)	0.621402	0.524183
6940	Ref1		Q9V3E7	Q9V3E7	Dorsal + Ventral Tl10B (7)	-0.318907	-0.383438
6825	Cog3	Conserved oligomeric Golgi complex subunit 3	Q961G1	Q961G1	Dorsal + Ventral Tl10B (7)	-0.266687	-0.295638
6770	vig2		Q960D3	Q960D3	Dorsal + Ventral Tl10B (7)	0.358743	0.330393
9179	eco	N-acetyltransferase eco	Q9VS50	Q9VS50	Dorsal + Ventral Tl10B (7)	-0.375324	-0.407316
6349	CG32251	Claspin homolog	Q8IRB5	Q8IRB5	Dorsal + Ventral Tl10B (7)	-0.496383	-0.541783
6262			Q8IPZ5	Q8IPZ5	Dorsal + Ventral Tl10B (7)	-0.223383	-0.283018
6179	sle	Protein slender lobes	Q8INM3	Q8INM3	Dorsal + Ventral Tl10B (7)	-0.329662	-0.361444
5923			Q7PLL6	Q7PLL6	Dorsal + Ventral Tl10B (7)	-0.286504	NaN
5306	sced		Q6NQZ5	Q6NQZ5	Dorsal + Ventral Tl10B (7)	-0.332891	-0.427955
5298			Q6NQY9	Q6NQY9	Dorsal + Ventral Tl10B (7)	-0.266504	-0.345477
5162	CG4622	Zinc finger CCHC domain-containing protein 8 homolog	Q2PE14	Q2PE14	Dorsal + Ventral Tl10B (7)	0.399624	0.38318
5096	Ubp64E	Ubiquitin carboxyl-terminal hydrolase 64E	Q24574	Q24574	Dorsal + Ventral Tl10B (7)	-0.285127	-0.422568
5095	Ubp64E	Ubiquitin carboxyl-terminal hydrolase 64E	Q24574	Q24574	Dorsal + Ventral Tl10B (7)	-0.285127	-0.422011
5052	Cp190	Centrosome-associated zinc finger protein CP190	Q24478	Q24478	Dorsal + Ventral Tl10B (7)	0.354163	0.348673
4960	Cnx99A		Q0KHZ9	Q0KHZ9	Dorsal + Ventral Tl10B (7)	-0.210696	-0.446095
4898	MEP-1		Q0E8J0	Q0E8J0	Dorsal + Ventral Tl10B (7)	-0.284582	-0.359001
9212	Cbl		Q9VSK2	Q9VSK2	Dorsal + Ventral Tl10B (7)	-0.0647481	-0.176693
4188	Df31		O16043	O16043	Dorsal + Ventral Tl10B (7)	-0.256931	-0.304449
9433	Abp1	Drebrin-like protein	Q9VU84	Q9VU84	Dorsal + Ventral Tl10B (7)	-0.296609	-0.387155
4152	Spt6	Transcription elongation factor SPT6	N0D8I3	N0D8I3	Dorsal + Ventral Tl10B (7)	-0.34956	-0.397288
9843			Q9VX34	Q9VX34	Dorsal + Ventral Tl10B (7)	0.306085	0.263815
3995	bif		M9PGW8	M9PGW8	Dorsal + Ventral Tl10B (7)	-0.314861	NaN
10005	CG2691	RRP12-like protein	X2JEW2	X2JEW2	Dorsal + Ventral Tl10B (7)	-0.123335	-0.262409
3539			Q9VIV0	Q9VIV0	Dorsal + Ventral Tl10B (7)	-0.300456	-0.376674
3505	poe	Protein purity of essence	M9PB68	M9PB68	Dorsal + Ventral Tl10B (7)	0.831205	0.49233
3306	BicD	Protein bicaudal D	M9NDR2	M9NDR2	Dorsal + Ventral Tl10B (7)	-0.163576	-0.216168
3251	eIF5B		M9ND37	M9ND37	Dorsal + Ventral Tl10B (7)	-0.293334	-0.401889
3245	eIF5B		M9ND37	M9ND37	Dorsal + Ventral Tl10B (7)	1.20186	1.14149
3231	l(2)gl	Lethal(2) giant larvae protein	M9NCX1	M9NCX1	Dorsal + Ventral Tl10B (7)	0.422585	0.346388
3205	spen	Protein split ends	M9NCM6	M9NCM6	Dorsal + Ventral Tl10B (7)	-0.217561	-0.24298
2979	Spn		M9NDX8	M9NDX8	Dorsal + Ventral Tl10B (7)	-0.257008	-0.323339
2971	Spn		M9NDX8	M9NDX8	Dorsal + Ventral Tl10B (7)	0.56238	0.264802
2970	Spn		M9NDX8	M9NDX8	Dorsal + Ventral Tl10B (7)	0.56238	0.264802
2814	pcm		Q9VWI1	Q9VWI1	Dorsal + Ventral Tl10B (7)	-0.312866	-0.36754
2770	sws	Neuropathy target esterase sws	E1JJF4	E1JJF4	Dorsal + Ventral Tl10B (7)	-0.261797	-0.387575
2433			B7Z0I8	B7Z0I8	Dorsal + Ventral Tl10B (7)	-0.260575	-0.474152
2387			B7Z0I8	B7Z0I8	Dorsal + Ventral Tl10B (7)	-0.308573	-0.409335
2371			B7Z0I8	B7Z0I8	Dorsal + Ventral Tl10B (7)	-0.213915	-0.248612
2293	kis		B7Z002	B7Z002	Dorsal + Ventral Tl10B (7)	-0.0106978	NaN
2265	kis		B7Z002	B7Z002	Dorsal + Ventral Tl10B (7)	-0.464757	-0.484446
2239	kis		B7Z002	B7Z002	Dorsal + Ventral Tl10B (7)	-0.225583	-0.376736
2186	Nplp1	Neuropeptide-like 1;MTYamide peptide;IPNamide peptide;NAP peptide;NPLP1-1;NPLP1-2;NPLP1-3;NPLP1-4;NPLP1-5;NPLP1-6	Q0E8W0	Q0E8W0	Dorsal + Ventral Tl10B (7)	0.409539	0.3364
2162	CG4040-RA		B5RJS0	B5RJS0	Dorsal + Ventral Tl10B (7)	0.193549	0.150233
2060	nudE	Nuclear distribution protein nudE homolog	B7Z0G0	B7Z0G0	Dorsal + Ventral Tl10B (7)	0.264471	0.0932252
1672	Dek		Q8IFW6	Q8IFW6	Dorsal + Ventral Tl10B (7)	-0.303982	-0.402082
1574	CG8545-RA		A1Z909	A1Z909	Dorsal + Ventral Tl10B (7)	-0.361264	-0.513919
1294			A0A0B4LH25	A0A0B4LH25	Dorsal + Ventral Tl10B (7)	-0.490537	-0.529557
1152	CG8370	Transmembrane protein 131 homolog	A0A0B4LFJ4	A0A0B4LFJ4	Dorsal + Ventral Tl10B (7)	-0.136322	-0.163492
10082			Q9VYW4	Q9VYW4	Dorsal + Ventral Tl10B (7)	-0.410449	-0.87095
1102	Inr-a		A0A0B4LFF9	A0A0B4LFF9	Dorsal + Ventral Tl10B (7)	0.527366	0.391289
499			A0A0B4K8A7	A0A0B4K8A7	Dorsal + Ventral Tl10B (7)	-0.380927	-0.549128
498			A0A0B4K8A7	A0A0B4K8A7	Dorsal + Ventral Tl10B (7)	-0.380927	-0.549128
328	mask	Ankyrin repeat and KH domain-containing protein mask	A0A0B4KHR8	A0A0B4KHR8	Dorsal + Ventral Tl10B (7)	-0.400984	-0.451174
257			A0A0B4K6I2	A0A0B4K6I2	Dorsal + Ventral Tl10B (7)	1.3669	1.24745
256			A0A0B4K6I2	A0A0B4K6I2	Dorsal + Ventral Tl10B (7)	1.3669	1.24745
215	rpk		O46342	O46342	Dorsal + Ventral Tl10B (7)	1.40058	1.39919
110	Su(var)2-10		A0A0B4JD33	A0A0B4JD33	Dorsal + Ventral Tl10B (7)	0.595471	0.416508
10202	Non2		Q9VZY0	Q9VZY0	Dorsal + Ventral Tl10B (7)	0.719205	0.314504
10345	DNA-ligI	DNA ligase 1	Q9W1H4	Q9W1H4	Dorsal + Ventral Tl10B (7)	-0.252622	-0.285799
12547	sle	Protein slender lobes	Q8INM3	Q8INM3	Dorsal + Ventral Tl10B (7)	-0.40508	-0.432652
13186	Msh6	Probable DNA mismatch repair protein Msh6	Q9VUM0	Q9VUM0	Dorsal + Ventral Tl10B (7)	-0.459816	-0.492696
13215			Q9VW40	Q9VW40	Dorsal + Ventral Tl10B (7)	0.330372	0.274404
13290	Amun		Q9VYV4	Q9VYV4	Dorsal + Ventral Tl10B (7)	-0.385898	-0.441219
13204			Q9VVG9	Q9VVG9	Dorsal + Ventral Tl10B (7)	0.533033	0.487681
12894	E(var)3-9		Q9VHJ3	Q9VHJ3	Dorsal + Ventral Tl10B (7)	0.457172	0.371302
12462	smid		Q7KU82	Q7KU82	Dorsal + Ventral Tl10B (7)	-0.305482	-0.452769
10347	DNA-ligI	DNA ligase 1	Q9W1H4	Q9W1H4	Dorsal + Ventral Tl10B (7)	-0.291698	-0.322143
10281	BcDNA:GH03108		Q9W0X8	Q9W0X8	Dorsal + Ventral Tl10B (7)	-0.24941	-0.362785
7179	CG8858	Proteasome-associated protein ECM29 homolog	Q9V677	Q9V677	Dorsal + Ventral Tl10B (7)	0.712805	0.6567
1510	rnh1		A1Z768	A1Z768	Dorsal + Ventral spn27A (8)	1.09911	1.56649
12155	Yp3	Vitellogenin-3	X2JEX8	X2JEX8	Dorsal + Ventral spn27A (8)	0.235614	0.377567
3489	Wee1;wee	Wee1-like protein kinase	M9PB57	M9PB57	Dorsal + Ventral spn27A (8)	0.0696097	0.186207
7148	MED26	Mediator of RNA polymerase II transcription subunit 26	Q9V4F9	Q9V4F9	Dorsal + Ventral spn27A (8)	0.560968	0.762195
7164	scra	Actin-binding protein anillin	Q9V4P1	Q9V4P1	Dorsal + Ventral spn27A (8)	0.243825	0.393862
7217			Q9V9U3	Q9V9U3	Dorsal + Ventral spn27A (8)	0.124585	0.21705
7453	Clbn	Nuclear export mediator factor NEMF homolog	Q9VBX1	Q9VBX1	Dorsal + Ventral spn27A (8)	0.1594	0.392129
8616	cup	Protein cup	X2J9P9	X2J9P9	Dorsal + Ventral spn27A (8)	0.243905	0.822762
41			A0A0B4JD24	A0A0B4JD24	Dorsal + Ventral spn27A (8)	-0.347501	-0.327199
13371	nocte		Q9W2U7	Q9W2U7	Dorsal + Ventral spn27A (8)	0.725646	0.844253
13454	l(1)1Bi		Q9W5E4	Q9W5E4	Dorsal + Ventral spn27A (8)	-0.477893	-0.422597
13393	Caf1-180		Q9W3D1	Q9W3D1	Dorsal + Ventral spn27A (8)	-0.443204	-0.3709
13117	Eaf6		Q9VRN3	Q9VRN3	Dorsal + Ventral spn27A (8)	0.087195	0.234791
42			A0A0B4JD24	A0A0B4JD24	Dorsal + Ventral spn27A (8)	-0.313034	-0.293786
381	garz		A1Z8W9	A1Z8W9	Dorsal + Ventral spn27A (8)	NaN	-0.154169
596	Patronin	Patronin	A0A0B4KEY6;A0A0B4KFA4	A0A0B4KFA4	Dorsal + Ventral spn27A (8)	-0.389674	-0.305368
623			Q9VNC4	Q9VNC4	Dorsal + Ventral spn27A (8)	-0.374424	-0.272748
729	CG5098	Uncharacterized protein CG5098	A0A126GUN5	A0A126GUN5	Dorsal + Ventral spn27A (8)	-0.332307	-0.278546
755	ald		Q9VEH1	Q9VEH1	Dorsal + Ventral spn27A (8)	-0.329861	-0.270684
786	CG15099	Protein dopey-1 homolog	A0A0B4KG81	A0A0B4KG81	Dorsal + Ventral spn27A (8)	0.301099	0.36118
1115	Inr-a		A0A0B4LFF9	A0A0B4LFF9	Dorsal + Ventral spn27A (8)	-0.452444	-0.403428
1168	Ef1beta	Probable elongation factor 1-beta	A0A0B4LFL3	A0A0B4LFL3	Dorsal + Ventral spn27A (8)	-0.201319	-0.172159
1189	ena	Protein enabled	A0A0B4LFX0	A0A0B4LFX0	Dorsal + Ventral spn27A (8)	-0.209098	-0.159182
1230	retn	Protein dead ringer	A0A0B4LGF9	A0A0B4LGF9	Dorsal + Ventral spn27A (8)	-0.483863	-0.338037
1271	Cenp-C		A0A0B4LGX0	A0A0B4LGX0	Dorsal + Ventral spn27A (8)	-0.340094	-0.302232
1388	FDY;vig2		A0A0S0X2W5;Q960D3	Q960D3	Dorsal + Ventral spn27A (8)	-0.191157	-0.148047
1477	BubR1		A1Z6I7	A1Z6I7	Dorsal + Ventral spn27A (8)	0.292042	0.370759
1485	BubR1		A1Z6I7	A1Z6I7	Dorsal + Ventral spn27A (8)	-0.295471	-0.239431
1651	Su(var)2-HP2		A1Z9S6	A1Z9S6	Dorsal + Ventral spn27A (8)	-0.310232	-0.265976
1854	Patj	Patj homolog	A4V1B2	A4V1B2	Dorsal + Ventral spn27A (8)	-0.310054	-0.279739
1895	ball	Nucleosomal histone kinase 1	A4V3G8	A4V3G8	Dorsal + Ventral spn27A (8)	-0.394641	-0.297263
1915	Doa		B7Z0R6	B7Z0R6	Dorsal + Ventral spn27A (8)	0.213324	0.403505
2266	kis		B7Z002	B7Z002	Dorsal + Ventral spn27A (8)	NaN	-0.248688
2370			B7Z0I8	B7Z0I8	Dorsal + Ventral spn27A (8)	NaN	-0.442942
2479	BcDNA:LD21969		Q9VI18	Q9VI18	Dorsal + Ventral spn27A (8)	-0.157659	-0.0919075
2562	ssh	Protein phosphatase Slingshot	D3PFH9	D3PFH9	Dorsal + Ventral spn27A (8)	-0.490052	-0.384839
2585	Nipped-B	Nipped-B protein	E1JGX3	E1JGX3	Dorsal + Ventral spn27A (8)	0.533944	0.625728
2657	E(bx)	Nucleosome-remodeling factor subunit NURF301	M9PE12	M9PE12	Dorsal + Ventral spn27A (8)	-0.123198	-0.090285
2795	X11L		M9PF12	M9PF12	Dorsal + Ventral spn27A (8)	0.281785	0.365431
2799	Set2	Histone-lysine N-methyltransferase;Probable histone-lysine N-methyltransferase CG1716	E1JJN9	E1JJN9	Dorsal + Ventral spn27A (8)	0.829007	1.36369
2954	CG13096-RA;CG13096	Ribosomal L1 domain-containing protein CG13096	H0RNN8	H0RNN8	Dorsal + Ventral spn27A (8)	-0.453061	-0.330576
2961	Spn		M9NDX8	M9NDX8	Dorsal + Ventral spn27A (8)	-0.397133	-0.286608
3077	Utx		M9PCJ7	M9PCJ7	Dorsal + Ventral spn27A (8)	0.585091	0.661997
3288	Reps		M9NDL7	M9NDL7	Dorsal + Ventral spn27A (8)	-0.33289	-0.308491
3430	fry	Protein furry	M9NFQ5	M9NFQ5	Dorsal + Ventral spn27A (8)	-0.364427	-0.297792
3431	fry	Protein furry	M9NFQ5	M9NFQ5	Dorsal + Ventral spn27A (8)	-0.386183	-0.318559
3605	Liprin-alpha		M9PC73	M9PC73	Dorsal + Ventral spn27A (8)	-0.288336	-0.248152
3842	wek	Zinc finger protein weckle	M9PFY1	M9PFY1	Dorsal + Ventral spn27A (8)	-0.341299	-0.318833
3889	Nopp140		M9PFZ1;Q7KTV5	Q7KTV5	Dorsal + Ventral spn27A (8)	0.165037	0.248924
4068	e(y)3	Supporter of activation of yellow protein	M9PHL0	M9PHL0	Dorsal + Ventral spn27A (8)	-0.34606	-0.217804
4253	east		Q7KW02	Q7KW02	Dorsal + Ventral spn27A (8)	-0.385947	-0.307356
4277	Fim		O61604	O61604	Dorsal + Ventral spn27A (8)	-0.386814	-0.305154
4471	Gl	Dynactin subunit 1	P13496	P13496	Dorsal + Ventral spn27A (8)	0.84462	1.08893
4472	Gl	Dynactin subunit 1	P13496	P13496	Dorsal + Ventral spn27A (8)	0.812198	1.03816
4523	Ote	Otefin	P20240	P20240	Dorsal + Ventral spn27A (8)	-0.406603	-0.32142
4884	TfIIFalpha	General transcription factor IIF subunit 1	Q05913	Q05913	Dorsal + Ventral spn27A (8)	-0.307899	-0.217272
4909	MEP-1		Q0E8J0	Q0E8J0	Dorsal + Ventral spn27A (8)	-0.326432	-0.236279
5151	RhoGAP1A		Q29QE1;X2JC00	Q29QE1	Dorsal + Ventral spn27A (8)	0.244139	0.351205
5167	CG4622	Zinc finger CCHC domain-containing protein 8 homolog	Q2PE14	Q2PE14	Dorsal + Ventral spn27A (8)	-0.432457	-0.41602
5227			Q59DT1	Q59DT1	Dorsal + Ventral spn27A (8)	NaN	-0.114778
5271	Synj		Q5U0V7	Q5U0V7	Dorsal + Ventral spn27A (8)	-0.218784	-0.187983
5412	ClC-b	Chloride channel protein	Q7JZ25	Q7JZ25	Dorsal + Ventral spn27A (8)	-0.28037	-0.238197
5427			Q7K0D3	Q7K0D3	Dorsal + Ventral spn27A (8)	-0.476561	-0.388766
5477	Map60		Q7K180	Q7K180	Dorsal + Ventral spn27A (8)	-0.419405	-0.297147
5496			Q7K264	Q7K264	Dorsal + Ventral spn27A (8)	0.101413	0.281383
5497			Q7K264	Q7K264	Dorsal + Ventral spn27A (8)	-0.0756096	0.0766112
5557	p47		Q7K3Z3	Q7K3Z3	Dorsal + Ventral spn27A (8)	NaN	-0.197087
5627	Amph		Q7KLE5	Q7KLE5	Dorsal + Ventral spn27A (8)	-0.272221	-0.235649
5632	bic	Transcription factor BTF3	Q7KM15	Q7KM15	Dorsal + Ventral spn27A (8)	0.351296	0.412006
5796	sip2		Q9VM57	Q9VM57	Dorsal + Ventral spn27A (8)	-0.120057	-0.0581937
5940	Skp2		Q7YZ95	Q7YZ95	Dorsal + Ventral spn27A (8)	-0.330361	-0.252477
6027	Akap200		Q9VLL3	Q9VLL3	Dorsal + Ventral spn27A (8)	0.573823	0.725488
6045	Chro		Q86BS3	Q86BS3	Dorsal + Ventral spn27A (8)	-0.505475	-0.425627
6056	Chro		Q86BS3	Q86BS3	Dorsal + Ventral spn27A (8)	-0.378454	-0.283134
6145	sle	Protein slender lobes	Q8INM3	Q8INM3	Dorsal + Ventral spn27A (8)	0.394671	0.562657
6172	sle	Protein slender lobes	Q8INM3	Q8INM3	Dorsal + Ventral spn27A (8)	-0.509264	-0.390642
6184	sle	Protein slender lobes	Q8INM3	Q8INM3	Dorsal + Ventral spn27A (8)	-0.364336	-0.304699
6214	sle;CG12592	Protein slender lobes;Slender lobes-like protein	Q8INM3	Q8INM3	Dorsal + Ventral spn27A (8)	-0.404887	-0.285682
6224	sle	Protein slender lobes	Q8INM3	Q8INM3	Dorsal + Ventral spn27A (8)	-0.545404	-0.388524
6234	CG10336	Protein TIPIN homolog	Q8INX3	Q8INX3	Dorsal + Ventral spn27A (8)	0.552175	0.666917
6237	CG9293-RB	Inhibitor of growth protein	Q8IP71	Q8IP71	Dorsal + Ventral spn27A (8)	0.349129	0.412247
6254	l(2)05714		Q9VMX2	Q9VMX2	Dorsal + Ventral spn27A (8)	0.530754	0.618769
6354	CG32251	Claspin homolog	Q8IRB5	Q8IRB5	Dorsal + Ventral spn27A (8)	-0.325988	-0.317861
6536	kuk		Q8SX89	Q8SX89	Dorsal + Ventral spn27A (8)	-0.33058	-0.294395
6590			Q8T051	Q8T051	Dorsal + Ventral spn27A (8)	0.396907	0.423655
6742	Pur-alpha		Q95RR6	Q95RR6	Dorsal + Ventral spn27A (8)	-0.323094	-0.286619
6806			Q9I7J4	Q9I7J4	Dorsal + Ventral spn27A (8)	-0.289856	-0.249203
6873	CG11505	La-related protein CG11505	Q9I7T7	Q9I7T7	Dorsal + Ventral spn27A (8)	0.270605	0.339862
7065	crp		Q9V406	Q9V406	Dorsal + Ventral spn27A (8)	0.214471	0.278869
7195	wcd	U3 small nucleolar RNA-associated protein 18 homolog	Q9V7P1	Q9V7P1	Dorsal + Ventral spn27A (8)	-0.385558	-0.156881
7261	yata		Q9VAH7	Q9VAH7	Dorsal + Ventral spn27A (8)	-0.139845	-0.0629044
7295	Slbp	Histone RNA hairpin-binding protein	Q9VAN6	Q9VAN6	Dorsal + Ventral spn27A (8)	-0.290493	-0.20935
7297	Pglym78;Pglym87		Q9VAN7	Q9VAN7	Dorsal + Ventral spn27A (8)	NaN	-0.0986128
7460	PQBP1		Q9VBY6	Q9VBY6	Dorsal + Ventral spn27A (8)	0.149	0.234062
7479	PIG-S;sud1	Prolyl 3-hydroxylase sudestada1	Q9VC10	Q9VC10	Dorsal + Ventral spn27A (8)	0.28572	0.368762
7539			Q9VC60	Q9VC60	Dorsal + Ventral spn27A (8)	0.53443	0.605069
7656	RanBP3		Q9VCI7	Q9VCI7	Dorsal + Ventral spn27A (8)	0.66811	0.818053
7708	loco;loco-RC	Regulator of G-protein signaling loco	Q9VCX1	Q9VCX1	Dorsal + Ventral spn27A (8)	-0.264593	-0.167793
7734	SNF4Agamma		Q9VDD2	Q9VDD2	Dorsal + Ventral spn27A (8)	-0.356539	-0.210811
7767	Srp72	Signal recognition particle subunit SRP72	Q9VDK7	Q9VDK7	Dorsal + Ventral spn27A (8)	-0.168058	-0.0787579
7850	Brf		Q9VEL2	Q9VEL2	Dorsal + Ventral spn27A (8)	0.257778	0.376916
7936			Q9VG01	Q9VG01	Dorsal + Ventral spn27A (8)	0.983041	1.01849
8114	pyd		Q9VHK1	Q9VHK1	Dorsal + Ventral spn27A (8)	-0.339466	-0.291518
8255	barr	Condensin complex subunit 2	Q9VIP9	Q9VIP9	Dorsal + Ventral spn27A (8)	-0.422651	-0.314061
8477	Dpy-30L1	Protein dpy-30 homolog	Q9VKQ9	Q9VKQ9	Dorsal + Ventral spn27A (8)	0.138296	0.318082
8498	pie		Q9VKW2	Q9VKW2	Dorsal + Ventral spn27A (8)	0.463638	0.586172
8677	mtm		Q9VMI9	Q9VMI9	Dorsal + Ventral spn27A (8)	0.594267	1.21298
8700	lost		Q9VN21	Q9VN21	Dorsal + Ventral spn27A (8)	-0.185659	-0.135531
8795			Q9VNE0	Q9VNE0	Dorsal + Ventral spn27A (8)	0.281361	0.337016
8796			Q9VNE0	Q9VNE0	Dorsal + Ventral spn27A (8)	0.281361	0.337016
8827	CG1218	UPF0609 protein CG1218	Q9VNI3	Q9VNI3	Dorsal + Ventral spn27A (8)	0.301527	0.402502
8840	BoYb	Putative ATP-dependent RNA helicase BoYb	Q9VNP5	Q9VNP5	Dorsal + Ventral spn27A (8)	-0.245921	-0.192269
8853	MED1	Mediator of RNA polymerase II transcription subunit 1	Q9VP05	Q9VP05	Dorsal + Ventral spn27A (8)	-0.242876	-0.168202
8882	pzg		Q9VP57	Q9VP57	Dorsal + Ventral spn27A (8)	NaN	0.777643
9092	Mon1		Q9VR38	Q9VR38	Dorsal + Ventral spn27A (8)	0.364262	0.836861
9110	waw	Translation factor waclaw, mitochondrial	Q9VRH6	Q9VRH6	Dorsal + Ventral spn27A (8)	NaN	-0.0743071
9241	Jarid2		Q9VT00	Q9VT00	Dorsal + Ventral spn27A (8)	NaN	-0.0398767
9254			Q9VT61	Q9VT61	Dorsal + Ventral spn27A (8)	-0.240819	-0.202677
9348	CG5645	Protein KRI1 homolog	Q9VTU0	Q9VTU0	Dorsal + Ventral spn27A (8)	0.322412	0.426431
9476	stwl		Q9VUE5	Q9VUE5	Dorsal + Ventral spn27A (8)	NaN	0.00163276
9712	dome	Cytokine receptor	Q9VWE0	Q9VWE0	Dorsal + Ventral spn27A (8)	NaN	-0.341902
9754	Ulp1		Q9VWK5	Q9VWK5	Dorsal + Ventral spn27A (8)	0.837657	0.930106
9836			Q9VX24	Q9VX24	Dorsal + Ventral spn27A (8)	-0.334013	-0.234807
9951			Q9VXW2	Q9VXW2	Dorsal + Ventral spn27A (8)	-0.339851	-0.294476
10089	Kmn1		Q9VYX4	Q9VYX4	Dorsal + Ventral spn27A (8)	-0.405931	-0.384967
10119	CG1737-RA		X2JEU3	X2JEU3	Dorsal + Ventral spn27A (8)	-0.390715	-0.293924
10122	CG1737-RA		X2JEU3	X2JEU3	Dorsal + Ventral spn27A (8)	-0.325807	-0.238533
10148			Q9VZ60	Q9VZ60	Dorsal + Ventral spn27A (8)	-0.423687	-0.310045
10152			Q9VZ60	Q9VZ60	Dorsal + Ventral spn27A (8)	-0.298966	-0.196093
10160			Q9VZ60	Q9VZ60	Dorsal + Ventral spn27A (8)	-0.288969	-0.213695
10167	CG15014	THUMP domain-containing protein 1 homolog	Q9VZD8	Q9VZD8	Dorsal + Ventral spn27A (8)	-0.252149	-0.160568
10326	enok	Histone acetyltransferase	Q9W1A9	Q9W1A9	Dorsal + Ventral spn27A (8)	0.922461	0.937032
10342	Upf3		Q9W1H3	Q9W1H3	Dorsal + Ventral spn27A (8)	-0.165086	-0.108909
10381	mi		Q9W1N8	Q9W1N8	Dorsal + Ventral spn27A (8)	0.141355	0.252654
10487	nocte		Q9W2U7	Q9W2U7	Dorsal + Ventral spn27A (8)	0.342357	0.385064
10489	nocte		Q9W2U7	Q9W2U7	Dorsal + Ventral spn27A (8)	0.38793	0.423892
10589	Caf1-180		Q9W3D1	Q9W3D1	Dorsal + Ventral spn27A (8)	0.215701	0.322795
10590	Caf1-180		Q9W3D1	Q9W3D1	Dorsal + Ventral spn27A (8)	-0.318526	-0.205142
10647	CG1677-RA		X2JE07	X2JE07	Dorsal + Ventral spn27A (8)	0.169726	0.27058
10665	CG1677-RA		X2JE07	X2JE07	Dorsal + Ventral spn27A (8)	NaN	-0.166623
11252	RhoGAP1A		X2JC00	X2JC00	Dorsal + Ventral spn27A (8)	-0.323718	-0.242624
11253	RhoGAP1A		X2JC00	X2JC00	Dorsal + Ventral spn27A (8)	-0.323718	-0.242624
11590	Caf1-105		A1Z898	A1Z898	Dorsal + Ventral spn27A (8)	-0.27821	-0.194867
11593	Caf1-105		A1Z898	A1Z898	Dorsal + Ventral spn27A (8)	0.191079	0.327837
11775	BcDNA:LD21969		Q9VI18	Q9VI18	Dorsal + Ventral spn27A (8)	-0.300654	-0.166629
11809	Klp31E	Kinesin-like protein	E1JHE1	E1JHE1	Dorsal + Ventral spn27A (8)	-0.227524	-0.194649
11813	Rtnl1	Reticulon-like protein	Q9VMV9	Q9VMV9	Dorsal + Ventral spn27A (8)	0.181642	0.299538
11817	E(bx)	Nucleosome-remodeling factor subunit NURF301	M9PE12	M9PE12	Dorsal + Ventral spn27A (8)	-0.280001	-0.25285
11894	Mur2B		M9MS86	M9MS86	Dorsal + Ventral spn27A (8)	NaN	-0.0126994
11986			Q9VIV0	Q9VIV0	Dorsal + Ventral spn27A (8)	-0.20923	-0.0961279
13088	Bacc		Q9VQF7	Q9VQF7	Dorsal + Ventral spn27A (8)	-0.266291	-0.15581
12165	Top2	DNA topoisomerase 2	P15348	P15348	Dorsal + Ventral spn27A (8)	-0.378588	-0.248617
12219	Klp61F	Bipolar kinesin KRP-130	P46863	P46863	Dorsal + Ventral spn27A (8)	0.383051	0.432599
12250	TfIIFalpha	General transcription factor IIF subunit 1	Q05913	Q05913	Dorsal + Ventral spn27A (8)	0.265943	0.329791
12262	MEP-1		Q0E8J0	Q0E8J0	Dorsal + Ventral spn27A (8)	-0.229581	-0.190399
12426	wde		Q7KMH9	Q7KMH9	Dorsal + Ventral spn27A (8)	0.219764	0.336981
12453	Apoltp		Q7KTG2	Q7KTG2	Dorsal + Ventral spn27A (8)	0.329111	0.60901
12709	bip2		Q9V4D4	Q9V4D4	Dorsal + Ventral spn27A (8)	-0.423501	-0.289759
12802	Nup98-96;Nup98-RA		Q9VCH5	Q9VCH5	Dorsal + Ventral spn27A (8)	-0.152658	-0.10306
13057			Q9VNW2	Q9VNW2	Dorsal + Ventral spn27A (8)	-0.492148	-0.416494
12843		Inhibitor of growth protein	Q9VEF5	Q9VEF5	Dorsal + Ventral spn27A (8)	0.466763	0.518606
12927	barr	Condensin complex subunit 2	Q9VIP9	Q9VIP9	Dorsal + Ventral spn27A (8)	-0.475548	-0.409349
12994	cup	Protein cup	X2J9P9	X2J9P9	Dorsal + Ventral spn27A (8)	0.34819	0.383653
13019	lost		Q9VN21	Q9VN21	Dorsal + Ventral spn27A (8)	-0.332326	-0.315459
13056	BoYb	Putative ATP-dependent RNA helicase BoYb	Q9VNP5	Q9VNP5	Dorsal + Ventral spn27A (8)	-0.245921	-0.192269
9862			Q9VXB4	Q9VXB4	Dorsal + Ventral spn27A (8)	NaN	0.413282
9642	Atg3	Autophagy-related protein 3	Q9VVS6	Q9VVS6	Dorsal + Ventral spn27A (8)	NaN	0.113376
8081			Q9VHC8	Q9VHC8	Dorsal + Ventral spn27A (8)	-0.084158	-0.066842
7983	Lk6		Q9VGI5	Q9VGI5	Dorsal + Ventral spn27A (8)	0.0886357	0.150321
7981	Lk6		Q9VGI5	Q9VGI5	Dorsal + Ventral spn27A (8)	0.122789	0.166988
7960	trus		Q9VG62	Q9VG62	Dorsal + Ventral spn27A (8)	NaN	0.0898472
6170	sle	Protein slender lobes	Q8INM3	Q8INM3	Dorsal + Ventral spn27A (8)	0.0441551	0.169651
5832	smid		Q7KU82	Q7KU82	Dorsal + Ventral spn27A (8)	0.255875	0.37034
3708	Wnk		M9PIH3	M9PIH3	Dorsal + Ventral spn27A (8)	0.174742	0.261383
2874			E2QCZ5	E2QCZ5	Dorsal + Ventral spn27A (8)	-0.135585	-0.0289062
1646	Su(var)2-HP2		A1Z9S6	A1Z9S6	Dorsal + Ventral spn27A (8)	0.256684	0.290204
11847			E2QCZ5	E2QCZ5	Dorsal + Ventral spn27A (8)	0.275815	0.379674
11014	Rif1		Q9XZ34	Q9XZ34	Dorsal + Ventral spn27A (8)	NaN	0.776986
7778	mdlc		Q9VDP8	Q9VDP8	Dorsal + Ventral spn27A (8)	NaN	0.687607
7777	mdlc		Q9VDP8	Q9VDP8	Dorsal + Ventral spn27A (8)	NaN	0.794572
7059	Rpn5		Q9V3Z4	Q9V3Z4	Dorsal + Ventral spn27A (8)	NaN	0.719942
5418	Sec61beta		Q7JZN0	Q7JZN0	Dorsal + Ventral spn27A (8)	0.296669	0.475731
5005	Slh	Protein sly1 homolog	Q24179	Q24179	Dorsal + Ventral spn27A (8)	NaN	0.803092
4399	RpII215	DNA-directed RNA polymerase II subunit RPB1	P04052	P04052	Dorsal + Ventral spn27A (8)	NaN	0.42037
4363	Yp1	Vitellogenin-1	X2JD55	X2JD55	Dorsal + Ventral spn27A (8)	NaN	0.251211
2551	Psc-RA;Psc	Polycomb group protein Psc	D0Z760	D0Z760	Dorsal + Ventral spn27A (8)	0.24889	0.410265
2039	enc	Protein encore	M9PE05	M9PE05	Dorsal + Ventral spn27A (8)	NaN	0.459553
833	CG8312-RA		Q86BA6	Q86BA6	Dorsal + Ventral spn27A (8)	0.221781	1.18891
11295	tacc		A0A0B4JCV4	A0A0B4JCV4	Dorsal + Ventral spn27A (8)	NaN	0.857119
12812	EloA	Transcription elongation factor B polypeptide 3	Q9VCP0	Q9VCP0	Dorsal + Ventral spn27A (8)	NaN	0.28556
234	cic		A0A0B4K6D6	A0A0B4K6D6	Dorsal + Ventral spn27A (8)	NaN	1.0098
979	dan	Protein distal antenna	A0A0B4KHU6	A0A0B4KHU6	Dorsal + Ventral spn27A (8)	-0.40627	0.0889919
1396	CG8223	Protein NASP homolog	A0A126BEE6	A0A126BEE6	Dorsal + Ventral spn27A (8)	-0.150053	0.176953
12094	Df31		O16043	O16043	Dorsal + Ventral spn27A (8)	-0.299495	-0.0799664
4810	Stim	Stromal interaction molecule homolog	P83094	P83094	Dorsal + Ventral spn27A (8)	NaN	-0.0218415
4794	CdsA	Phosphatidate cytidylyltransferase;Phosphatidate cytidylyltransferase, photoreceptor-specific	X2JC55	X2JC55	Dorsal + Ventral spn27A (8)	-0.658446	-0.181269
505			A0A0B4KEE7	A0A0B4KEE7	Dorsal + Ventral spn27A (8)	NaN	-0.0655312
636	SRPK		Q0E965	Q0E965	Dorsal + Ventral Tl10B spn27A (9)	-0.00206249	0.0385795
637	SRPK		Q0E965	Q0E965	Dorsal + Ventral Tl10B spn27A (9)	-0.00206249	0.00150262
1476	BubR1		A1Z6I7	A1Z6I7	Dorsal + Ventral Tl10B spn27A (9)	0.303834	0.330627
1637	Su(var)2-HP2		A1Z9S6	A1Z9S6	Dorsal + Ventral Tl10B spn27A (9)	0.951905	0.912588
2805	Set2	Histone-lysine N-methyltransferase;Probable histone-lysine N-methyltransferase CG1716	E1JJN9	E1JJN9	Dorsal + Ventral Tl10B spn27A (9)	0.915313	0.925779
2826	CG10417	Probable protein phosphatase CG10417	E2QC56	E2QC56	Dorsal + Ventral Tl10B spn27A (9)	0.0195449	0.0182615
6199	sle;CG12592	Protein slender lobes;Slender lobes-like protein	Q8INM3	Q8INM3	Dorsal + Ventral Tl10B spn27A (9)	-0.206091	-0.194514
6584			Q8SYR5	Q8SYR5	Dorsal + Ventral Tl10B spn27A (9)	0.453995	0.426488
6771	vig2		Q960D3	Q960D3	Dorsal + Ventral Tl10B spn27A (9)	0.140481	0.178867
7079	vig		Q9V426	Q9V426	Dorsal + Ventral Tl10B spn27A (9)	0.000820205	0.00569047
7678	EloA	Transcription elongation factor B polypeptide 3	Q9VCP0	Q9VCP0	Dorsal + Ventral Tl10B spn27A (9)	-0.0470778	0.0647661
10583	Caf1-180		Q9W3D1	Q9W3D1	Dorsal + Ventral Tl10B spn27A (9)	0.186393	0.259611
12460	smid		Q7KU82	Q7KU82	Dorsal + Ventral Tl10B spn27A (9)	0.557303	0.644704
13022	lost		Q9VN21	Q9VN21	Dorsal + Ventral Tl10B spn27A (9)	0.0870483	0.0763733
281	CG6051	Lateral signaling target protein 2 homolog	A0A0B4LHZ6	A0A0B4LHZ6	Dorsal + Ventral Tl10B spn27A (9)	-0.109322	-0.0722847
297	lig;lig-RA	Protein lingerer	A0A126GUM8	A0A126GUM8	Dorsal + Ventral Tl10B spn27A (9)	-0.324463	-0.392466
479	cnn	Centrosomin	A0A0B4K863	A0A0B4K863	Dorsal + Ventral Tl10B spn27A (9)	-0.0879033	-0.012804
644	CG7701;CG30015-RB		A8DY98	A8DY98	Dorsal + Ventral Tl10B spn27A (9)	0.847392	0.862043
972	CycB3	G2/mitotic-specific cyclin-B3	A0A0B4KHT9	A0A0B4KHT9	Dorsal + Ventral Tl10B spn27A (9)	0.434793	0.430454
1342	uex		A0A0B7P9G0	A0A0B7P9G0	Dorsal + Ventral Tl10B spn27A (9)	-0.292288	-0.296097
1573	CG8490-RB		A1Z8X0	A1Z8X0	Dorsal + Ventral Tl10B spn27A (9)	0.390606	0.388427
1707	RhoGAP54D		A1ZAW3	A1ZAW3	Dorsal + Ventral Tl10B spn27A (9)	-0.238922	-0.210609
1715	RhoGAP54D		A1ZAW3	A1ZAW3	Dorsal + Ventral Tl10B spn27A (9)	0.448218	0.419578
1837	GlyP	Alpha-1,4 glucan phosphorylase;Glycogen phosphorylase	A4UZZ4	A4UZZ4	Dorsal + Ventral Tl10B spn27A (9)	-0.301828	-0.357935
1855	Patj	Patj homolog	A4V1B2	A4V1B2	Dorsal + Ventral Tl10B spn27A (9)	-0.313355	-0.263841
1916	Doa		B7Z0R6	B7Z0R6	Dorsal + Ventral Tl10B spn27A (9)	0.425247	0.628824
2063	Abl	Non-specific protein-tyrosine kinase;Tyrosine-protein kinase Abl	X2JGR4	X2JGR4	Dorsal + Ventral Tl10B spn27A (9)	-0.0560346	-0.0695794
2161	CG4040-RA		B5RJS0	B5RJS0	Dorsal + Ventral Tl10B spn27A (9)	0.389874	0.419328
2187	Mapmodulin;Anp32a	Acidic leucine-rich nuclear phosphoprotein 32 family member A	B7YZR7	B7YZR7	Dorsal + Ventral Tl10B spn27A (9)	-0.149905	-0.135792
2220			B7YZY0	B7YZY0	Dorsal + Ventral Tl10B spn27A (9)	-0.170356	-0.183291
2261	kis		B7Z002	B7Z002	Dorsal + Ventral Tl10B spn27A (9)	-0.159978	-0.244462
2404			B7Z0I8	B7Z0I8	Dorsal + Ventral Tl10B spn27A (9)	0.427866	0.390158
2429			B7Z0I8	B7Z0I8	Dorsal + Ventral Tl10B spn27A (9)	-0.235585	-0.244146
2443			B7Z0I8	B7Z0I8	Dorsal + Ventral Tl10B spn27A (9)	-0.0619335	-0.00927752
2446	CG42375-RA		B7Z0J4	B7Z0J4	Dorsal + Ventral Tl10B spn27A (9)	-0.330837	-0.253298
2690	siz		E1JI59;Q6U9V3	E1JI59	Dorsal + Ventral Tl10B spn27A (9)	-0.000521131	0.0491904
2854	tho2		Q9VQ76	Q9VQ76	Dorsal + Ventral Tl10B spn27A (9)	-0.210458	-0.135568
2958	CG9791-RC;CG9791	ATP-dependent RNA helicase SUV3 homolog, mitochondrial	H1UUI2	H1UUI2	Dorsal + Ventral Tl10B spn27A (9)	-0.279097	-0.246094
3026	4E-T		L0MLQ9	L0MLQ9	Dorsal + Ventral Tl10B spn27A (9)	-0.294161	-0.172486
3036	Slip1	Slo-interacting protein 1	L0MN84	L0MN84	Dorsal + Ventral Tl10B spn27A (9)	-0.338837	-0.324032
3046	Bsg25D	Blastoderm-specific protein 25D	M9MRD3	M9MRD3	Dorsal + Ventral Tl10B spn27A (9)	-0.273805	-0.335423
3072	CG4747	Putative oxidoreductase GLYR1 homolog	X2JDP6	X2JDP6	Dorsal + Ventral Tl10B spn27A (9)	-0.265738	-0.150032
3103	akirin	Akirin	M9MRW4	M9MRW4	Dorsal + Ventral Tl10B spn27A (9)	-0.371962	-0.432854
3308	BicD	Protein bicaudal D	M9NDR2	M9NDR2	Dorsal + Ventral Tl10B spn27A (9)	-0.255557	-0.248105
3542	alpha-Spec	Spectrin alpha chain	M9PDQ0	M9PDQ0	Dorsal + Ventral Tl10B spn27A (9)	-0.0479174	-0.110642
3669	chif	Protein chiffon	M9PD16	M9PD16	Dorsal + Ventral Tl10B spn27A (9)	-0.0890691	-0.211083
3759	hep	Dual specificity mitogen-activated protein kinase kinase hemipterous	X2JJV1	X2JJV1	Dorsal + Ventral Tl10B spn27A (9)	0.407209	0.485968
3762	ZnT63C		Q7K3K5	Q7K3K5	Dorsal + Ventral Tl10B spn27A (9)	-0.226281	-0.200235
3843	wek	Zinc finger protein weckle	M9PFY1	M9PFY1	Dorsal + Ventral Tl10B spn27A (9)	-0.34929	-0.366513
3883	Nopp140		M9PFZ1;Q7KTV5	Q7KTV5	Dorsal + Ventral Tl10B spn27A (9)	-0.200731	-0.186938
3967	G9a		Q95RU8	Q95RU8	Dorsal + Ventral Tl10B spn27A (9)	-0.115405	-0.227035
4166	mst	Protein misato	X2JG23	X2JG23	Dorsal + Ventral Tl10B spn27A (9)	-0.227793	-0.194899
4187	Df31		O16043	O16043	Dorsal + Ventral Tl10B spn27A (9)	0.47425	0.519179
4240	east		Q7KW02	Q7KW02	Dorsal + Ventral Tl10B spn27A (9)	-0.262909	-0.258776
4304	crm	Protein cramped	O76906	O76906	Dorsal + Ventral Tl10B spn27A (9)	0.493158	0.45028
4327	Axs	Anoctamin	O97132	O97132	Dorsal + Ventral Tl10B spn27A (9)	0.729422	0.722134
4358	Yp1	Vitellogenin-1	X2JD55	X2JD55	Dorsal + Ventral Tl10B spn27A (9)	-0.154585	-0.141794
4364	Yp1	Vitellogenin-1	X2JD55	X2JD55	Dorsal + Ventral Tl10B spn27A (9)	-0.272837	-0.306459
4384	Yp2	Vitellogenin-2	X2JB25	X2JB25	Dorsal + Ventral Tl10B spn27A (9)	-0.145679	-0.123098
4758	Taf11	Transcription initiation factor TFIID subunit 11	P49906	P49906	Dorsal + Ventral Tl10B spn27A (9)	-0.214486	-0.199465
4765	Pen	Importin subunit alpha	P52295	P52295	Dorsal + Ventral Tl10B spn27A (9)	-0.179369	-0.194598
4830	Letm1	LETM1 and EF-hand domain-containing protein anon-60Da, mitochondrial	P91927	P91927	Dorsal + Ventral Tl10B spn27A (9)	0.00263549	-0.116058
4982	fzy		Q24044	Q24044	Dorsal + Ventral Tl10B spn27A (9)	1.71575	1.63438
5049	Cp190	Centrosome-associated zinc finger protein CP190	Q24478	Q24478	Dorsal + Ventral Tl10B spn27A (9)	-0.221907	-0.270569
5114	mus210	DNA repair protein complementing XP-C cells homolog	Q24595	Q24595	Dorsal + Ventral Tl10B spn27A (9)	-0.22632	-0.206596
5161	CG4622	Zinc finger CCHC domain-containing protein 8 homolog	Q2PE14	Q2PE14	Dorsal + Ventral Tl10B spn27A (9)	0.308777	0.318418
5199	mus201		Q4U2Q5	Q4U2Q5	Dorsal + Ventral Tl10B spn27A (9)	-0.284921	-0.250816
5234	scaf6		Q59E33	Q59E33	Dorsal + Ventral Tl10B spn27A (9)	-0.235191	-0.24763
5327	MAN1		Q7JRE4	Q7JRE4	Dorsal + Ventral Tl10B spn27A (9)	-0.283785	-0.289659
5400	HipHop		Q7JWP6	Q7JWP6	Dorsal + Ventral Tl10B spn27A (9)	-0.0335743	-0.0333433
5404	Nup62		Q7JXF5	Q7JXF5	Dorsal + Ventral Tl10B spn27A (9)	-0.15313	-0.151864
5479	Map60		Q7K180	Q7K180	Dorsal + Ventral Tl10B spn27A (9)	-0.172253	-0.168781
5707	CG11148	PERQ amino acid-rich with GYF domain-containing protein CG11148	Q7KQM6	Q7KQM6	Dorsal + Ventral Tl10B spn27A (9)	-0.0444745	-0.0204515
5833	smid		Q7KU82	Q7KU82	Dorsal + Ventral Tl10B spn27A (9)	1.18739	1.2025
5853	iPLA2-VIA		Q9VT60	Q9VT60	Dorsal + Ventral Tl10B spn27A (9)	-0.276907	-0.276728
6133	CG32473-RC;CG32473-RB		Q8INH6	Q8INH6	Dorsal + Ventral Tl10B spn27A (9)	-0.600461	-0.443826
6147	sle	Protein slender lobes	Q8INM3	Q8INM3	Dorsal + Ventral Tl10B spn27A (9)	-0.2594	-0.215463
6189	sle;CG12592	Protein slender lobes;Slender lobes-like protein	Q8INM3	Q8INM3	Dorsal + Ventral Tl10B spn27A (9)	-0.238676	-0.232739
6191	sle;CG12592	Protein slender lobes;Slender lobes-like protein	Q8INM3	Q8INM3	Dorsal + Ventral Tl10B spn27A (9)	-0.119547	-0.165914
6203	sle	Protein slender lobes	Q8INM3	Q8INM3	Dorsal + Ventral Tl10B spn27A (9)	-0.174089	-0.159637
6257			Q8IPU7	Q8IPU7	Dorsal + Ventral Tl10B spn27A (9)	-0.365263	-0.389968
6258			Q8IPU7	Q8IPU7	Dorsal + Ventral Tl10B spn27A (9)	-0.387301	-0.411308
6467			Q8MS69	Q8MS69	Dorsal + Ventral Tl10B spn27A (9)	-0.277231	-0.237609
6472	BigH1		Q8MSC4	Q8MSC4	Dorsal + Ventral Tl10B spn27A (9)	-0.313206	-0.273191
6532	pch2		Q8SX76	Q8SX76	Dorsal + Ventral Tl10B spn27A (9)	-0.0571802	-0.0548561
6712	Dref		Q94883	Q94883	Dorsal + Ventral Tl10B spn27A (9)	-0.220592	-0.188455
6834	XNP	Transcriptional regulator ATRX homolog	Q9GQN5	Q9GQN5	Dorsal + Ventral Tl10B spn27A (9)	-0.280096	-0.288114
7043	Seipin	Seipin	Q9V3X4	Q9V3X4	Dorsal + Ventral Tl10B spn27A (9)	-0.0935772	-0.0884016
7413	Nup358		Q9VBU7	Q9VBU7	Dorsal + Ventral Tl10B spn27A (9)	-0.33351	-0.295248
7522	Syx18		Q9VC58	Q9VC58	Dorsal + Ventral Tl10B spn27A (9)	-0.373738	-0.324083
7615	CG5515-RA		Q9VCB9	Q9VCB9	Dorsal + Ventral Tl10B spn27A (9)	-0.017537	-0.0538248
7636	eIF4G2		Q9VCH1	Q9VCH1	Dorsal + Ventral Tl10B spn27A (9)	-0.0288842	-0.117183
7858	Patr-1		Q9VEN9	Q9VEN9	Dorsal + Ventral Tl10B spn27A (9)	-0.281964	-0.206516
7914	Afti		Q9VFK5	Q9VFK5	Dorsal + Ventral Tl10B spn27A (9)	-0.180278	-0.174363
8103	E(var)3-9		Q9VHJ3	Q9VHJ3	Dorsal + Ventral Tl10B spn27A (9)	-0.205705	-0.244694
8235	Cen		Q9VIK6	Q9VIK6	Dorsal + Ventral Tl10B spn27A (9)	-0.221936	-0.252178
8236	Cen		Q9VIK6	Q9VIK6	Dorsal + Ventral Tl10B spn27A (9)	-0.224393	-0.188997
8354			Q9VJE3	Q9VJE3	Dorsal + Ventral Tl10B spn27A (9)	0.603423	0.621654
8495	holn1	CD2 antigen cytoplasmic tail-binding protein 2 homolog	Q9VKV5	Q9VKV5	Dorsal + Ventral Tl10B spn27A (9)	0.47127	0.683566
8562	Aldh		Q9VLC5	Q9VLC5	Dorsal + Ventral Tl10B spn27A (9)	-0.196681	-0.158021
8604	nop5		Q9VM69	Q9VM69	Dorsal + Ventral Tl10B spn27A (9)	-0.00824555	-0.0931567
8655	slam		Q9VME5	Q9VME5	Dorsal + Ventral Tl10B spn27A (9)	-0.136737	-0.160192
8725	cno		Q9VN82	Q9VN82	Dorsal + Ventral Tl10B spn27A (9)	0.637572	0.624629
8741			Q9VNB2	Q9VNB2	Dorsal + Ventral Tl10B spn27A (9)	-0.319376	-0.279132
8801	asl		Q9VNE4	Q9VNE4	Dorsal + Ventral Tl10B spn27A (9)	-0.401475	-0.427231
8812			Q9VNH5	Q9VNH5	Dorsal + Ventral Tl10B spn27A (9)	-0.186559	-0.325573
8846			Q9VNW2	Q9VNW2	Dorsal + Ventral Tl10B spn27A (9)	-0.220447	-0.185129
8847			Q9VNW2	Q9VNW2	Dorsal + Ventral Tl10B spn27A (9)	-0.0446098	-0.0813007
8898	Pitslre	Serine/threonine-protein kinase PITSLRE	Q9VPC0	Q9VPC0	Dorsal + Ventral Tl10B spn27A (9)	-0.258623	-0.261195
8905	Pitslre	Serine/threonine-protein kinase PITSLRE	Q9VPC0	Q9VPC0	Dorsal + Ventral Tl10B spn27A (9)	-0.408887	-0.336176
9059	Cep97		Q9VQV7	Q9VQV7	Dorsal + Ventral Tl10B spn27A (9)	-0.148505	-0.150199
9206	exo70	Exocyst complex component 7	Q9VSJ8	Q9VSJ8	Dorsal + Ventral Tl10B spn27A (9)	-0.0706574	-0.135704
9327			Q9VTN7	Q9VTN7	Dorsal + Ventral Tl10B spn27A (9)	-0.205191	-0.239751
9328			Q9VTN7	Q9VTN7	Dorsal + Ventral Tl10B spn27A (9)	-0.264962	-0.301003
9423	cmb		Q9VU76	Q9VU76	Dorsal + Ventral Tl10B spn27A (9)	0.349798	0.385215
9474	stwl		Q9VUE5	Q9VUE5	Dorsal + Ventral Tl10B spn27A (9)	-0.300186	-0.165011
9480	stwl		Q9VUE5	Q9VUE5	Dorsal + Ventral Tl10B spn27A (9)	-0.206066	-0.215592
9624			Q9VVG9	Q9VVG9	Dorsal + Ventral Tl10B spn27A (9)	-0.174677	-0.192434
10059	ATP7		Q9VYT4	Q9VYT4	Dorsal + Ventral Tl10B spn27A (9)	-0.183286	-0.186867
10383	Golgin245		Q9W1R3	Q9W1R3	Dorsal + Ventral Tl10B spn27A (9)	-0.383963	-0.337094
10384	Golgin245		Q9W1R3	Q9W1R3	Dorsal + Ventral Tl10B spn27A (9)	-0.383963	-0.337094
10402			Q9W1U7	Q9W1U7	Dorsal + Ventral Tl10B spn27A (9)	-0.134927	-0.0797409
10528	l(1)G0320		Q9W335	Q9W335	Dorsal + Ventral Tl10B spn27A (9)	0.485245	0.460448
10660	CG1677-RA		X2JE07	X2JE07	Dorsal + Ventral Tl10B spn27A (9)	-0.168704	-0.163002
10850	EG:22E5.7		Q9W531	Q9W531	Dorsal + Ventral Tl10B spn27A (9)	0.00525647	-0.0781038
10889			Q9W5Q1	Q9W5Q1	Dorsal + Ventral Tl10B spn27A (9)	-0.385287	-0.356861
11082	BcDNA.GH08385		Q9Y124	Q9Y124	Dorsal + Ventral Tl10B spn27A (9)	0.405071	0.406316
11526	Rpn13	Proteasomal ubiquitin receptor ADRM1 homolog	A0A0B4LFA6;Q7K2G1	Q7K2G1	Dorsal + Ventral Tl10B spn27A (9)	-0.202355	-0.230301
11634	par-1		Q963E6	Q963E6	Dorsal + Ventral Tl10B spn27A (9)	-0.355004	-0.317139
11883	CG4747	Putative oxidoreductase GLYR1 homolog	X2JDP6	X2JDP6	Dorsal + Ventral Tl10B spn27A (9)	-0.144009	-0.0671584
11917	eIF5B		M9ND37	M9ND37	Dorsal + Ventral Tl10B spn27A (9)	-0.306081	-0.343694
12036	CG6479-RA;CG6479-RB		M9PFY2	M9PFY2	Dorsal + Ventral Tl10B spn27A (9)	0.636174	0.621799
12370	MAN1		Q7JRE4	Q7JRE4	Dorsal + Ventral Tl10B spn27A (9)	-0.371033	-0.360032
12438	CG11148	PERQ amino acid-rich with GYF domain-containing protein CG11148	Q7KQM6	Q7KQM6	Dorsal + Ventral Tl10B spn27A (9)	-0.28058	-0.281037
12500	Chro		Q86BS3	Q86BS3	Dorsal + Ventral Tl10B spn27A (9)	-0.300158	-0.323031
12527	sle	Protein slender lobes	Q8INM3	Q8INM3	Dorsal + Ventral Tl10B spn27A (9)	-0.167571	-0.113411
12576	Eps-15		Q8MMD2	Q8MMD2	Dorsal + Ventral Tl10B spn27A (9)	-0.335227	-0.268493
12832	Srp72	Signal recognition particle subunit SRP72	Q9VDK7	Q9VDK7	Dorsal + Ventral Tl10B spn27A (9)	-0.257935	-0.221535
12983	Aldh		Q9VLC5	Q9VLC5	Dorsal + Ventral Tl10B spn27A (9)	-0.196681	-0.158021
13007	slam		Q9VME5	Q9VME5	Dorsal + Ventral Tl10B spn27A (9)	-0.282521	-0.283549
13011			Q9VMI2	Q9VMI2	Dorsal + Ventral Tl10B spn27A (9)	-0.356643	-0.244152
13039			Q9VNE0	Q9VNE0	Dorsal + Ventral Tl10B spn27A (9)	0.486382	0.418779
13577	Aldh		Q9VLC5	Q9VLC5	Dorsal + Ventral Tl10B spn27A (9)	-0.196681	-0.158021
179	btsz		Q59DW9	Q59DW9	Dorsal + Ventral Tl10B spn27A (9)	-0.1909	-0.113779
139	Taf1	Transcription initiation factor TFIID subunit 1	E1JJ72	E1JJ72	Dorsal + Ventral Tl10B spn27A (9)	-0.378241	-0.388182
901	Rpn2	26S proteasome non-ATPase regulatory subunit 1	A0A0B4KHE9	A0A0B4KHE9	Lateral + Ventral Tl10B (10)	-0.0133103	-0.0411188
1845	CycE	G1/S-specific cyclin-E	A4V0R4	A4V0R4	Lateral + Ventral Tl10B (10)	0.103017	0.0402446
8269			Q9VJ11	Q9VJ11	Lateral + Ventral Tl10B (10)	0.128192	-0.00999063
8385	CG31729-RA;CG6263	Phospholipid-transporting ATPase	Q9VK04;Q9VK06	Q9VK06	Lateral + Ventral Tl10B (10)	0.0751787	0.0358324
1856	Patj	Patj homolog	A4V1B2	A4V1B2	Lateral + Ventral Tl10B (10)	-0.0830296	-0.126953
1846	CycE	G1/S-specific cyclin-E	A4V0R4	A4V0R4	Lateral + Ventral Tl10B (10)	-0.00650842	-0.0698736
653	CG15187		A0A0B4KFB8	A0A0B4KFB8	Lateral + Ventral Tl10B (10)	0.131404	0.0810806
1040	Gprk2	G protein-coupled receptor kinase 2	A0A0B4KI69	A0A0B4KI69	Lateral + Ventral Tl10B (10)	0.230568	0.0548351
1360	B52	Serine-arginine protein 55	A0A0C4DHG5	A0A0C4DHG5	Lateral + Ventral Tl10B (10)	0.180574	0.111401
3444	Plp		M9NFV3	M9NFV3	Lateral + Ventral Tl10B (10)	0.221005	0.0324489
3960			M9PGG8	M9PGG8	Lateral + Ventral Tl10B (10)	0.166006	-0.0393038
4663	Gnf1	Replication factor C subunit 1	P35600	P35600	Lateral + Ventral Tl10B (10)	0.360653	0.287386
6832	XNP	Transcriptional regulator ATRX homolog	Q9GQN5	Q9GQN5	Lateral + Ventral Tl10B (10)	0.670571	0.442887
8501			Q9VKW5	Q9VKW5	Lateral + Ventral Tl10B (10)	0.536864	0.427838
2936	Rtf1-RA;Rtf1	RNA polymerase-associated protein Rtf1	H0RNK7	H0RNK7	Lateral + Ventral Tl10B (10)	-0.230947	-0.474497
9300			Q9VTE6	Q9VTE6	Lateral + Ventral Tl10B (10)	0.0886364	-0.109247
4870	Ssrp	FACT complex subunit Ssrp1	Q05344	Q05344	Lateral + Ventral Tl10B (10)	-0.25594	NaN
11717			M9PG55	M9PG55	Lateral + Ventral Tl10B (10)	0.26077	0.19325
11380			A0A0B4KEE7	A0A0B4KEE7	Lateral + Ventral Tl10B (10)	-0.262309	-0.378587
11120	Tim8	Mitochondrial import inner membrane translocase subunit Tim8	X2JB87	X2JB87	Lateral + Ventral Tl10B (10)	0.757471	0.517652
11100	BcDNA.GH04978		Q9Y145	Q9Y145	Lateral + Ventral Tl10B (10)	0.428481	0.395513
11063	Pol32		Q9Y118	Q9Y118	Lateral + Ventral Tl10B (10)	0.450496	0.187179
10943			Q9XZ11	Q9XZ11	Lateral + Ventral Tl10B (10)	-0.432523	-0.47182
10942			Q9XZ11	Q9XZ11	Lateral + Ventral Tl10B (10)	-0.432523	-0.47182
10874	mei-38		Q9W584	Q9W584	Lateral + Ventral Tl10B (10)	0.813598	0.791072
10844	EG:67A9.2		Q9W526	Q9W526	Lateral + Ventral Tl10B (10)	-0.234286	NaN
10831	Mct1		Q9W509	Q9W509	Lateral + Ventral Tl10B (10)	-0.30019	-0.378329
10829	eIF3-S4-1	Eukaryotic translation initiation factor 3 subunit G-1	Q9W4X7	Q9W4X7	Lateral + Ventral Tl10B (10)	0.343495	0.322154
10793	rb	AP-3 complex subunit beta	Q9W4K1	Q9W4K1	Lateral + Ventral Tl10B (10)	0.394041	0.144972
10526	Hex-A	Hexokinase	Q9W330	Q9W330	Lateral + Ventral Tl10B (10)	-0.241031	-0.303744
10431			Q9W281	Q9W281	Lateral + Ventral Tl10B (10)	0.372311	0.354743
10344	DNA-ligI	DNA ligase 1	Q9W1H4	Q9W1H4	Lateral + Ventral Tl10B (10)	-0.324836	-0.397975
10330	RpL12		Q9W1B9	Q9W1B9	Lateral + Ventral Tl10B (10)	0.505097	0.464362
10138	Dlic		Q9VZ20	Q9VZ20	Lateral + Ventral Tl10B (10)	0.381456	0.298859
9921	Tcp-1zeta		Q9VXQ5	Q9VXQ5	Lateral + Ventral Tl10B (10)	0.769458	0.656615
9853			X2JFW6	X2JFW6	Lateral + Ventral Tl10B (10)	-0.338536	-0.412935
9852			X2JFW6	X2JFW6	Lateral + Ventral Tl10B (10)	-0.338536	-0.412935
9646			Q9VVV7	Q9VVV7	Lateral + Ventral Tl10B (10)	-0.211576	-0.331663
9645			Q9VVV7	Q9VVV7	Lateral + Ventral Tl10B (10)	-0.225221	-0.338553
9492	Prosbeta2	Proteasome subunit beta type	Q9VUJ1	Q9VUJ1	Lateral + Ventral Tl10B (10)	0.566464	0.211212
9398	SRm160		Q9VU43	Q9VU43	Lateral + Ventral Tl10B (10)	0.380212	0.340802
9371	SRm160		Q9VU43	Q9VU43	Lateral + Ventral Tl10B (10)	0.424328	0.355925
9357	nst		Q9VTZ4	Q9VTZ4	Lateral + Ventral Tl10B (10)	0.587693	0.479853
9221	Cdc6		Q9VSM9	Q9VSM9	Lateral + Ventral Tl10B (10)	0.390052	0.333182
9073			Q9VQZ8	Q9VQZ8	Lateral + Ventral Tl10B (10)	0.444438	0.357766
11905	spen	Protein split ends	M9NCM6	M9NCM6	Lateral + Ventral Tl10B (10)	-0.141827	NaN
8548	Etl1	SWI/SNF-related matrix-associated actin-dependent regulator of chromatin subfamily A containing DEAD/H box 1 homolog	Q9VL72	Q9VL72	Lateral + Ventral Tl10B (10)	0.216018	0.192836
8547	Etl1	SWI/SNF-related matrix-associated actin-dependent regulator of chromatin subfamily A containing DEAD/H box 1 homolog	Q9VL72	Q9VL72	Lateral + Ventral Tl10B (10)	0.216567	0.15412
8182			Q9VID9	Q9VID9	Lateral + Ventral Tl10B (10)	0.915832	0.894147
7746	slmb		Q9VDE3	Q9VDE3	Lateral + Ventral Tl10B (10)	0.382095	0.190553
7384	CG6066	UPF0396 protein CG6066	Q9VB74	Q9VB74	Lateral + Ventral Tl10B (10)	0.311308	0.192122
7363	wdb		Q9VB23	Q9VB23	Lateral + Ventral Tl10B (10)	-0.215625	-0.304987
7326	Moca-cyp		Q9VAW1	Q9VAW1	Lateral + Ventral Tl10B (10)	0.373063	0.340523
7320	Moca-cyp		Q9VAW1	Q9VAW1	Lateral + Ventral Tl10B (10)	0.280324	0.253347
7310			Q9VAU6	Q9VAU6	Lateral + Ventral Tl10B (10)	-0.161996	-0.206517
7186	TppII	Tripeptidyl-peptidase 2	Q9V6K1	Q9V6K1	Lateral + Ventral Tl10B (10)	0.376405	0.291358
6909	Gtp-bp	Signal recognition particle receptor subunit alpha homolog	Q9U5L1	Q9U5L1	Lateral + Ventral Tl10B (10)	0.478767	0.310109
6908	Gtp-bp	Signal recognition particle receptor subunit alpha homolog	Q9U5L1	Q9U5L1	Lateral + Ventral Tl10B (10)	-0.46434	-0.569132
6675	Atu	Another transcription unit protein	Q94546	Q94546	Lateral + Ventral Tl10B (10)	-0.214122	-0.491845
6660	Atu	Another transcription unit protein	Q94546	Q94546	Lateral + Ventral Tl10B (10)	0.314089	0.26773
6640	Rpd3	Histone deacetylase Rpd3	Q94517	Q94517	Lateral + Ventral Tl10B (10)	0.911229	0.748336
6578	CSN3	COP9 signalosome complex subunit 3	Q8SYG2	Q8SYG2	Lateral + Ventral Tl10B (10)	0.327747	0.260958
6374	YT521-B		Q8IRD2	Q8IRD2	Lateral + Ventral Tl10B (10)	0.410628	0.310842
6372	YT521-B		Q8IRD2	Q8IRD2	Lateral + Ventral Tl10B (10)	0.526482	0.362674
6347	CG32251	Claspin homolog	Q8IRB5	Q8IRB5	Lateral + Ventral Tl10B (10)	-0.122081	-0.24246
6164	sle	Protein slender lobes	Q8INM3	Q8INM3	Lateral + Ventral Tl10B (10)	-0.0071724	-0.14986
5948			Q7YZ99	Q7YZ99	Lateral + Ventral Tl10B (10)	0.327266	0.266876
5924			Q7PLL6	Q7PLL6	Lateral + Ventral Tl10B (10)	-0.325087	-0.36059
5715			Q8IMG3	Q8IMG3	Lateral + Ventral Tl10B (10)	0.360409	0.322907
5685	Aats-cys	Cysteine--tRNA ligase, cytoplasmic	Q7KN90	Q7KN90	Lateral + Ventral Tl10B (10)	1.12645	0.959605
5608	Spn42Da		Q7K8Y3	Q7K8Y3	Lateral + Ventral Tl10B (10)	0.758098	0.68495
5515			Q7K2N0	Q7K2N0	Lateral + Ventral Tl10B (10)	-0.165246	-0.286093
5481	Map60		Q7K180	Q7K180	Lateral + Ventral Tl10B (10)	0.368272	0.139785
5184	Fbl6		Q494G8	Q494G8	Lateral + Ventral Tl10B (10)	0.486482	0.332966
5126	l(2)not	Lethal(2)neighbour of tid protein	Q27333	Q27333	Lateral + Ventral Tl10B (10)	-0.387535	-0.462306
5092	Ubp64E	Ubiquitin carboxyl-terminal hydrolase 64E	Q24574	Q24574	Lateral + Ventral Tl10B (10)	0.522015	0.330433
5067	RpA-70	Replication protein A 70 kDa DNA-binding subunit	Q24492	Q24492	Lateral + Ventral Tl10B (10)	-0.167111	-0.240347
5029	Iswi	Chromatin-remodeling complex ATPase chain Iswi	Q24368	Q24368	Lateral + Ventral Tl10B (10)	0.46637	0.425495
5001	Orc2	Origin recognition complex subunit 2	Q24168	Q24168	Lateral + Ventral Tl10B (10)	0.209023	0.148761
4995	RpL29	60S ribosomal protein L29	Q24154	Q24154	Lateral + Ventral Tl10B (10)	0.339405	0.237893
4936	RpS11	40S ribosomal protein S11	Q0E9B6	Q0E9B6	Lateral + Ventral Tl10B (10)	0.456934	0.3764
4935			Q0E9B5	Q0E9B5	Lateral + Ventral Tl10B (10)	0.297627	0.249293
4905	MEP-1		Q0E8J0	Q0E8J0	Lateral + Ventral Tl10B (10)	0.211269	0.0891912
4832	14-3-3epsilon	14-3-3 protein epsilon	P92177	P92177	Lateral + Ventral Tl10B (10)	0.53961	0.49063
4779	2002-09-01	Septin-2	P54359	P54359	Lateral + Ventral Tl10B (10)	0.288524	0.194422
4603	Aats-glupro	Bifunctional glutamate/proline--tRNA ligase;Glutamate--tRNA ligase;Proline--tRNA ligase	P28668	P28668	Lateral + Ventral Tl10B (10)	-0.253775	-0.376209
4566	Map205	205 kDa microtubule-associated protein	Q8IMF5	Q8IMF5	Lateral + Ventral Tl10B (10)	0.617055	0.569194
4491	Top2	DNA topoisomerase 2	P15348	P15348	Lateral + Ventral Tl10B (10)	0.32102	0.213845
4428	alphaTub67C	Tubulin alpha-4 chain	P06606	P06606	Lateral + Ventral Tl10B (10)	-0.284634	-0.32914
4425	alphaTub67C	Tubulin alpha-4 chain	P06606	P06606	Lateral + Ventral Tl10B (10)	0.332123	0.273094
4369	Yp2	Vitellogenin-2	X2JB25	X2JB25	Lateral + Ventral Tl10B (10)	0.535522	0.245697
4351	Yp1	Vitellogenin-1	X2JD55	X2JD55	Lateral + Ventral Tl10B (10)	0.377056	0.338415
4191	RpL3	60S ribosomal protein L3	O16797	O16797	Lateral + Ventral Tl10B (10)	0.252077	0.171836
4156	Spt6	Transcription elongation factor SPT6	N0D8I3	N0D8I3	Lateral + Ventral Tl10B (10)	-0.207982	-0.263286
4104			M9PIC3	M9PIC3	Lateral + Ventral Tl10B (10)	0.262432	0.229327
3905	Nopp140		M9PFZ1;Q7KTV5	Q7KTV5	Lateral + Ventral Tl10B (10)	1.01024	0.962639
3076	Utx		M9PCJ7	M9PCJ7	Lateral + Ventral Tl10B (10)	0.192894	0.133349
2946	Rtf1-RA;Rtf1	RNA polymerase-associated protein Rtf1	H0RNK7	H0RNK7	Lateral + Ventral Tl10B (10)	0.401674	0.358122
2745	WRNexo-RB;WRNexo	Werner Syndrome-like exonuclease	E8NH59	E8NH59	Lateral + Ventral Tl10B (10)	0.177535	0.151716
2519	Moe	Moesin/ezrin/radixin homolog 1	M9PHG2	M9PHG2	Lateral + Ventral Tl10B (10)	0.263795	0.23949
2438			B7Z0I8	B7Z0I8	Lateral + Ventral Tl10B (10)	-0.224552	-0.410045
2421			B7Z0I8	B7Z0I8	Lateral + Ventral Tl10B (10)	-0.299766	-0.383457
2174	CG4040-RA		B5RJS0	B5RJS0	Lateral + Ventral Tl10B (10)	-0.297938	-0.32761
2095	Rnp4F	RNA-binding protein 4F	A8JUY0	A8JUY0	Lateral + Ventral Tl10B (10)	-0.251205	-0.358618
1575	CG8545-RA		A1Z909	A1Z909	Lateral + Ventral Tl10B (10)	0.223876	0.00396946
1392	CG8223	Protein NASP homolog	A0A126BEE6	A0A126BEE6	Lateral + Ventral Tl10B (10)	0.212199	0.0915773
1367	B52		A0A0C4DHG5	A0A0C4DHG5	Lateral + Ventral Tl10B (10)	0.42097	0.28443
1366	B52		A0A0C4DHG5	A0A0C4DHG5	Lateral + Ventral Tl10B (10)	0.585441	0.42883
1165	eIF3-S8	Eukaryotic translation initiation factor 3 subunit C	A0A0B4LFL2	A0A0B4LFL2	Lateral + Ventral Tl10B (10)	-0.150276	-0.231078
1081	coil		A0A0B4LEV8	A0A0B4LEV8	Lateral + Ventral Tl10B (10)	0.43898	0.39412
1038	spn-F		Q9V9Y9	Q9V9Y9	Lateral + Ventral Tl10B (10)	0.388287	0.344873
1028	CG5514-RA		Q9VAY4	Q9VAY4	Lateral + Ventral Tl10B (10)	0.217298	0.119774
981	PSR	Bifunctional arginine demethylase and lysyl-hydroxylase PSR	A0A0B4KHW1	A0A0B4KHW1	Lateral + Ventral Tl10B (10)	0.587358	0.292884
953	CSN5	COP9 signalosome complex subunit 5	A0A0B4KHM2	A0A0B4KHM2	Lateral + Ventral Tl10B (10)	0.413537	0.306045
915	puf	Ubiquitin carboxyl-terminal hydrolase	A0A0B4LIK5	A0A0B4LIK5	Lateral + Ventral Tl10B (10)	0.734169	0.58141
817	Stat92E	Signal transducer and activator of transcription;Signal transducer and transcription activator	A0A0B4KHS6;A0A0B4KGI7	A0A0B4KGI7	Lateral + Ventral Tl10B (10)	0.296515	0.223718
792	Tab2		A0A0B4KG87	A0A0B4KG87	Lateral + Ventral Tl10B (10)	-0.281756	-0.331127
709	Bruce		A0A0B4KH36	A0A0B4KH36	Lateral + Ventral Tl10B (10)	-0.400224	-0.542169
702	Kdm2	JmjC domain-containing histone demethylation protein 1	A0A0B4KFJ7	A0A0B4KFJ7	Lateral + Ventral Tl10B (10)	0.729141	0.671583
697	Rpn8	26S proteasome non-ATPase regulatory subunit 7	A0A0B4KGE6	A0A0B4KGE6	Lateral + Ventral Tl10B (10)	0.47019	0.392787
509			A0A0B4KEE7	A0A0B4KEE7	Lateral + Ventral Tl10B (10)	-0.198578	-0.281592
422	larp	La-related protein 1	A0A0B4K7Y7	A0A0B4K7Y7	Lateral + Ventral Tl10B (10)	0.314869	0.254763
280	Scm	Polycomb protein Scm	A0A0B4K6M7	A0A0B4K6M7	Lateral + Ventral Tl10B (10)	0.178294	0.124878
239	pps		Q9VG78	Q9VG78	Lateral + Ventral Tl10B (10)	0.25506	0.191939
55	tacc		A0A0B4JCV4	A0A0B4JCV4	Lateral + Ventral Tl10B (10)	0.441118	0.36384
[truncated: 431 more rows]
