# Supplementary material for: Differential regulation of the proteome and phosphoproteome along the dorso-ventral axis of the early Drosophila embryo
Source: eLife. 2024 Sep 2;13:e99263. doi: 10.7554/eLife.99263 (PMC11466282; doi:10.7554/eLife.99263)
Supplement: Supplementary file 11. — Empty cell in gene and protein name indicate the detected protein (or protein that hosts a phosphosite) had not been given a gene and/or a protein name in the Uniprot database version used in this study. NaN indicates it was not possible or did not correspond to calculate the Euclidean distance using a particular ventralized mutant. [file elife-99263-supp11.xlsx]

## Sheet: LFQ_Proteome_EDScores
LFQ_ID	Gene Name (or CG Number)	Protein Name	UniprotID	Majority Uniprot ID	DV_Cluster	DLVtl ED Score	DLVsp ED Score
409	Gp150		A0A0B4LGB0;Q24007;Q8MLT4	A0A0B4LGB0;Q24007;Q8MLT4	Dorsal (1)	0.806619	0.78065
4404	Hf		Q9VIQ4	Q9VIQ4	Dorsal (1)	0.810342	0.61211
3136	vito		Q8SWS7	Q8SWS7	Dorsal (1)	0.840179	0.780465
1747	Mkk4		O61444	O61444	Dorsal (1)	0.845928	0.802303
2881	Ptr		Q86P36;A0A0B4KED8;A0A0B4KEC6	Q86P36	Dorsal (1)	0.806575	0.687893
12		Oxysterol-binding protein	Q8IN56;Q9I7I8;A0A0B4JDD8;A0A0B4JDG2;B7Z0M9;Q7KSB3;A0A0B4JCZ0	Q8IN56;Q9I7I8;A0A0B4JDD8;A0A0B4JDG2;B7Z0M9;Q7KSB3;A0A0B4JCZ0	Dorsal (1)	0.85319	0.798751
5780			Q9VZQ7	Q9VZQ7	Dorsal (1)	0.531801	0.531801
65	tmod;tmod-RC		A8JRH3;A0A0B4K6N4;O46231;E1JJ21;Q9VA56;Q9VA58;C7LAH8;A0A0B4KHF2;Q9VA59;A0A0B4K7R6;A0A0B4KHW6	A8JRH3;A0A0B4K6N4;O46231;E1JJ21;Q9VA56;Q9VA58;C7LAH8;A0A0B4KHF2;Q9VA59;A0A0B4K7R6;A0A0B4KHW6	Dorsal (1)	0.674883	0.669092
72	alpha-Est5		A0A0B4K6V8	A0A0B4K6V8	Dorsal (1)	0.609675	0.604855
74	wake		A0A0B4K6W6;A0A0B4LHH4;A0A0B4K6D0	A0A0B4K6W6;A0A0B4LHH4;A0A0B4K6D0	Dorsal (1)	0.656724	0.754318
87	chn	Protein charlatan	A0A0B4K876;A0A0B4K7Z6;A0A0B4K7A3;Q7YU81;A0A0B4K7Q9	A0A0B4K876;A0A0B4K7Z6;A0A0B4K7A3;Q7YU81	Dorsal (1)	0.756194	0.780326
175	LRP1		A1Z7C4;A0A0B4KFD1	A1Z7C4;A0A0B4KFD1	Dorsal (1)	0.808004	0.806292
210	GstS1		A0A0B4KFT5	A0A0B4KFT5	Dorsal (1)	0.455775	0.614942
224	Acyp2	Acylphosphatase-2	A0A0B4KG16;Q9VF36	A0A0B4KG16;Q9VF36	Dorsal (1)	0.859046	0.831532
271	AnxB9	Annexin;Annexin B9	A0A0B4KH34;P22464	A0A0B4KH34;P22464	Dorsal (1)	0.812901	0.790954
327	Tnks	Tankyrase	A0A0B4KI19;Q9VBP3	A0A0B4KI19;Q9VBP3	Dorsal (1)	0.863716	0.850358
349	fra		A0A0B4LEX6;A1Z920;A1Z921	A0A0B4LEX6;A1Z920;A1Z921	Dorsal (1)	0.725688	0.725296
355	Cyp12d1-p	Probable cytochrome P450 12d1 proximal, mitochondrial	A0A0B4LF45;P82712	A0A0B4LF45;P82712	Dorsal (1)	0.674715	0.652324
426	CG8399	Putative ferric-chelate reductase 1 homolog	A0A0B4LGL5;Q8MSU3	A0A0B4LGL5;Q8MSU3	Dorsal (1)	0.848071	0.827138
432	corto	Centrosomal and chromosomal factor	A0A0B4LGR6;P41046	A0A0B4LGR6;P41046	Dorsal (1)	0.871445	0.828094
491	flfl	Serine/threonine-protein phosphatase 4 regulatory subunit 3	A0A0C4DHE6;Q9VFS5	A0A0C4DHE6;Q9VFS5	Dorsal (1)	0.843339	0.814629
518	Mical	Protein-methionine sulfoxide oxidase Mical	A0A126GUS4;Q86BA1;A0A0B4K703;A0A0B4K6D5;A0A126GUS6;A0A0B4K6N6	A0A126GUS4;Q86BA1;A0A0B4K703;A0A0B4K6D5;A0A126GUS6;A0A0B4K6N6	Dorsal (1)	0.825459	0.809299
557	didum		A1Z6Z9;A1Z6Z8;A1Z700	A1Z6Z9;A1Z6Z8;A1Z700	Dorsal (1)	0.826278	0.829172
558	CG2144-RA		A1Z705	A1Z705	Dorsal (1)	0.825991	0.800887
566	rnh1		A1Z768;Q7JY33	A1Z768;Q7JY33	Dorsal (1)	0.870691	0.845655
615			A1Z8I8;A1Z8I6;Q7JWT7;B7YZF1	A1Z8I8	Dorsal (1)	0.505273	0.629307
622	CG18343-RA		A1Z8T3	A1Z8T3	Dorsal (1)	0.813076	0.790974
650			A1Z9K0	A1Z9K0	Dorsal (1)	0.845405	0.809303
687	CG4847-RD		Q7K5N8;A1ZAU4	Q7K5N8;A1ZAU4	Dorsal (1)	0.843135	0.803252
702	GstE7		A1ZB72	A1ZB72	Dorsal (1)	0.808901	0.789378
705	slim	Kelch domain-containing protein 10 homolog	A1ZB86	A1ZB86	Dorsal (1)	0.766188	0.754146
715	CG11257-RA		A1ZBK6	A1ZBK6	Dorsal (1)	0.84061	0.811311
738	EcR	Ecdysone receptor	A4UZ51;E1JGY2;P34021	A4UZ51;E1JGY2;P34021	Dorsal (1)	0.779066	0.761549
753	Patj	Patj homolog	A4V1B2;Q9NB04	A4V1B2;Q9NB04	Dorsal (1)	0.829575	0.810066
756	Gyc76C	Guanylate cyclase	Q7JQ32;A4V243	Q7JQ32;A4V243	Dorsal (1)	0.802461	0.750272
827	CG34039-RA		A8E6W0	A8E6W0	Dorsal (1)	0.822656	0.81697
844			A8JNV1	A8JNV1	Dorsal (1)	0.792197	0.772224
910	kappaB-Ras	NF-kappa-B inhibitor-interacting Ras-like protein	B7YZS7;Q9V4L4	B7YZS7;Q9V4L4	Dorsal (1)	0.839657	0.832624
938			B7Z0D7;Q9VSE1	B7Z0D7;Q9VSE1	Dorsal (1)	0.846618	0.822781
945	CG42245-RA		B7Z0I5	B7Z0I5	Dorsal (1)	0.836178	0.806757
965	CG34408-RA		B7Z138;Q9W2X2;X2JB32;Q8IRL5;X2JD61;X2JEC6;X2JEP7;X2JJ95;B7Z140;X2JB38	B7Z138;Q9W2X2;X2JB32;Q8IRL5;X2JD61;X2JEC6;X2JEP7;X2JJ95;B7Z140;X2JB38	Dorsal (1)	0.842786	0.836706
1042	Obp99a	General odorant-binding protein 99a	D1FYH5;Q9VAJ4	D1FYH5;Q9VAJ4	Dorsal (1)	0.828111	0.777262
1044	CaMKII	Calcium/calmodulin-dependent protein kinase type II alpha chain	D1YSG7;Q00168;L0MLR4;L0MLP2	D1YSG7;Q00168;L0MLR4;L0MLP2	Dorsal (1)	0.845975	0.818153
1090	bsk	Mitogen-activated protein kinase;Stress-activated protein kinase JNK	E1JHD6;P92208	E1JHD6;P92208	Dorsal (1)	0.796898	0.740496
1134	p38a;Mpk2	Mitogen-activated protein kinase;Mitogen-activated protein kinase 14A	E1JIV6;O62618	E1JIV6;O62618	Dorsal (1)	0.824138	0.802613
1154	Fur2	Furin-like protease 2	E1JJL4;P30432;E1JJL5	E1JJL4;P30432	Dorsal (1)	0.867916	0.850446
1163	GstT3		Q9VRA4;E1JJS1	Q9VRA4;E1JJS1	Dorsal (1)	0.84565	0.83927
1193	Taf2	Transcription initiation factor TFIID subunit 2	E8NHB1;Q24325	E8NHB1;Q24325	Dorsal (1)	0.826339	0.804824
1209	PGRP-LD-RB;Pmi	Transmembrane protein 11 homolog, mitochondrial	G4LTX1;Q8IQ56	G4LTX1;Q8IQ56	Dorsal (1)	0.804235	0.808323
1221	CG16935-RA;CG16935	Probable trans-2-enoyl-CoA reductase, mitochondrial	H8F4T6;Q9V6U9	H8F4T6;Q9V6U9	Dorsal (1)	0.83991	0.832402
1282	spen	Protein split ends	M9NCM6;M9PDR5;Q8SX83;M9PBZ3;M9PBJ8	M9NCM6;M9PDR5;Q8SX83;M9PBZ3;M9PBJ8	Dorsal (1)	0.880497	0.854712
1296	Plp		M9ND93;M9PCJ5;Q400N2;M9PFP0;M9PI63;M9PFA8;M9PFJ2;M9PCK2;M9NFV3;M9PFA3;M9PFP4;Q400N1	M9ND93;M9PCJ5;Q400N2;M9PFP0;M9PI63;M9PFA8;M9PFJ2;M9PCK2;M9NFV3;M9PFA3;M9PFP4	Dorsal (1)	0.838925	0.803823
1318	Pp2B-14D	Serine/threonine-protein phosphatase;Serine/threonine-protein phosphatase 2B catalytic subunit 2	M9NE01;Q27889	M9NE01;Q27889	Dorsal (1)	0.882803	0.852461
1333	chic	Profilin	M9NEU5;P25843	M9NEU5;P25843	Dorsal (1)	0.826954	0.811776
1343	BG:DS09217.4		Q9V3K7;M9NF32	Q9V3K7;M9NF32	Dorsal (1)	0.846832	0.810601
1353	RhoGAP19D		M9NFH4;X2JEI9;E1JJS2;Q9VRA6	M9NFH4;X2JEI9;E1JJS2;Q9VRA6	Dorsal (1)	0.841497	0.845414
1399	Atg4a		M9PBM3;Q9VPW2	M9PBM3;Q9VPW2	Dorsal (1)	0.854312	0.848854
1519	CG12182-RA		M9PED1;Q9VZZ7	M9PED1;Q9VZZ7	Dorsal (1)	0.835275	0.828288
1565	gdl	Gonadal protein gdl	M9PFK4;P22468	M9PFK4;P22468	Dorsal (1)	0.782381	0.781421
1573	CG5830-RA		Q9VUX0;M9PFN0	Q9VUX0;M9PFN0	Dorsal (1)	0.7985	0.798665
1611	CG11596		M9PGG7	M9PGG7	Dorsal (1)	0.84945	0.841947
1663	CG32521-RB		M9PI18;Q9VRF7;M9PHP6	M9PI18;Q9VRF7;M9PHP6	Dorsal (1)	0.837128	0.821938
1685	Ice	Caspase;Caspase subunit p21;Caspase subunit p12	O01382	O01382	Dorsal (1)	0.861493	0.835786
1710	Chi		O18353;Q7KVG9	O18353;Q7KVG9	Dorsal (1)	0.846854	0.836938
1838	Act42A	Actin-42A	P02572	P02572	Dorsal (1)	0.779909	0.741604
1853	prd	Segmentation protein paired	P06601	P06601	Dorsal (1)	0.856075	0.80772
1871	Ccdc56	Cytochrome c oxidase assembly factor 3, mitochondrial	P0DKM0	P0DKM0	Dorsal (1)	0.83926	0.829506
1927	Tbp	TATA-box-binding protein	P20227	P20227	Dorsal (1)	0.787729	0.793268
1933	trx	Histone-lysine N-methyltransferase trithorax	P20659	P20659	Dorsal (1)	0.661902	0.771334
1939	Z600	Protein Z600	P22469	P22469	Dorsal (1)	0.861474	0.848857
1968	tld	Dorsal-ventral patterning protein tolloid	P25723	P25723	Dorsal (1)	0.67126	0.697221
1980	RpS6	40S ribosomal protein S6	P29327	P29327	Dorsal (1)	0.821426	0.79332
2048	Rala	Ras-related protein Ral-a	P48555	P48555	Dorsal (1)	0.831598	0.828851
2138	RpS13	40S ribosomal protein S13	X2J950;Q03334	X2J950;Q03334	Dorsal (1)	0.818774	0.811086
2162			Q0E8G6;Q9VSY2	Q0E8G6;Q9VSY2	Dorsal (1)	0.857139	0.838887
2199	Lsd-2		Q0KHS7	Q0KHS7	Dorsal (1)	0.806164	0.811946
2264	Dsor1	Dual specificity mitogen-activated protein kinase kinase dSOR1	Q24324;X2JAZ3;REV__CON__Q28107	Q24324;X2JAZ3	Dorsal (1)	0.845857	0.819469
2283	hop	Tyrosine-protein kinase hopscotch	Q24592	Q24592	Dorsal (1)	0.859765	0.82528
2342	Apf		Q4V6M1	Q4V6M1	Dorsal (1)	0.811547	0.809334
2356			Q8IR19;Q59E43	Q8IR19;Q59E43	Dorsal (1)	0.829144	0.80722
2365	CG17698-RA		Q5LJP6;A4V2C3;Q5LJP5;M9PGA6	Q5LJP6;A4V2C3;Q5LJP5;M9PGA6	Dorsal (1)	0.791601	0.801969
2430	Hsl		Q7JR83	Q7JR83	Dorsal (1)	0.861844	0.851785
2452	CG30491;CG30495		Q7JUS1	Q7JUS1	Dorsal (1)	0.83594	0.790466
2474	GstE11		Q7JVZ8	Q7JVZ8	Dorsal (1)	0.797846	0.781993
2476			Q7JW07	Q7JW07	Dorsal (1)	0.788207	0.778689
2513	Atg7		Q7JY94;A1ZBA9	Q7JY94;A1ZBA9	Dorsal (1)	0.849805	0.834192
2573	Hen1	Small RNA 2-O-methyltransferase	Q7K175	Q7K175	Dorsal (1)	0.73553	0.7548
2607	CG10265-RB		Q7K2K2;A0A0C4DHG4	Q7K2K2;A0A0C4DHG4	Dorsal (1)	0.848991	0.849462
2626	Pi3K68D		Q7K3H0	Q7K3H0	Dorsal (1)	0.867869	0.827541
2638	CG5721	Armadillo repeat-containing protein 6 homolog	Q7K486	Q7K486	Dorsal (1)	0.849871	0.845805
2657	CG6550	Threonylcarbamoyladenosine tRNA methylthiotransferase	Q7K4W1	Q7K4W1	Dorsal (1)	0.839063	0.821677
2668	Gpo-1	Glycerol-3-phosphate dehydrogenase	Q7K569	Q7K569	Dorsal (1)	0.769538	0.723186
2714	Pten		Q9V3L4;Q7KMQ6;Q9Y0B6	Q9V3L4;Q7KMQ6;Q9Y0B6	Dorsal (1)	0.823844	0.815898
2742	Ude		Q7KS11	Q7KS11	Dorsal (1)	0.506456	0.506456
2750	sea		Q7KSQ0	Q7KSQ0	Dorsal (1)	0.852861	0.830314
2765	Apoltp		Q7KTG2	Q7KTG2	Dorsal (1)	0.823727	0.81059
2812	CG33228-RA		Q7KVF6	Q7KVF6	Dorsal (1)	0.839836	0.831553
2818	Trf4-1		Q7KVS9	Q7KVS9	Dorsal (1)	0.871539	0.84615
2824			Q7KW09;Q9W554	Q7KW09;Q9W554	Dorsal (1)	0.853553	0.828006
2837	Nipped-B	Nipped-B protein	Q7PLI2;E1JGX3;A0A0B4KF23	Q7PLI2;E1JGX3;A0A0B4KF23	Dorsal (1)	0.847477	0.835445
2858	CG33172-RA		Q86B53	Q86B53	Dorsal (1)	0.811128	0.784324
2884			Q8I050	Q8I050	Dorsal (1)	0.712458	0.678609
2942	CG31320	Dynein assembly factor 5, axonemal	Q8INF7	Q8INF7	Dorsal (1)	0.835444	0.822074
3002	scramb1		Q8IQD7;Q8IQD8;Q9VT88	Q8IQD7;Q8IQD8;Q9VT88	Dorsal (1)	0.851292	0.804778
3045	thoc7	THO complex protein 7	Q8IRJ8	Q8IRJ8	Dorsal (1)	0.829495	0.825284
3054	CG3038-RB;EG:BACR37P7.1		Q8IRZ0;Q95RP8;X2JD78	Q8IRZ0;Q95RP8;X2JD78	Dorsal (1)	0.863364	0.827934
3096			Q8MS38	Q8MS38	Dorsal (1)	0.840489	0.833141
3116	Mes-4	Probable histone-lysine N-methyltransferase Mes-4;Histone-lysine N-methyltransferase	Q8MT36;A0A0B4KHR6	Q8MT36;A0A0B4KHR6	Dorsal (1)	0.842633	0.794301
3234	conu		Q8T0G4	Q8T0G4	Dorsal (1)	0.859768	0.834277
3249			Q8T481	Q8T481	Dorsal (1)	0.800774	0.788337
3250	Rrp45		Q8T4A9	Q8T4A9	Dorsal (1)	0.833755	0.810795
3260	Alg10	Putative Dol-P-Glc:Glc(2)Man(9)GlcNAc(2)-PP-Dol alpha-1,2-glucosyltransferase	Q8T8L8	Q8T8L8	Dorsal (1)	0.773332	0.750988
3376	Pvf1		Q9BLX1;Q9VWP6;X2JCH3	Q9BLX1;Q9VWP6;X2JCH3	Dorsal (1)	0.656631	0.764931
3395	Ku80	ATP-dependent DNA helicase II subunit 2	Q9I7M8	Q9I7M8	Dorsal (1)	0.849027	0.826978
3423	Myt1	Membrane-associated tyrosine- and threonine-specific cdc2-inhibitory kinase	Q9NI63	Q9NI63	Dorsal (1)	0.848964	0.804927
3438	ECSIT	Evolutionarily conserved signaling intermediate in Toll pathway, mitochondrial	Q9U6M0	Q9U6M0	Dorsal (1)	0.869854	0.821699
3441	Doc1		Q9U8L5;M9PBY6	Q9U8L5;M9PBY6	Dorsal (1)	0.352284	0.352284
3453	Catsup	Protein catecholamines up	Q9V3A4	Q9V3A4	Dorsal (1)	0.732637	0.756491
3539	RecQ5		Q9V433;Q59E27;Q7YZ98	Q9V433;Q59E27;Q7YZ98	Dorsal (1)	0.813033	0.830904
3547	Kr-h2	Krueppel homolog 2	X2J4W8;Q9V447	X2J4W8;Q9V447	Dorsal (1)	0.813534	0.798646
3551	Kap-alpha3	Importin subunit alpha	Q9V455	Q9V455	Dorsal (1)	0.886035	0.850474
3570	Eph	Receptor protein-tyrosine kinase	Q9V4E5;Q8IMC2;Q0KIF4;D1YSF9;Q59DQ4	Q9V4E5;Q8IMC2;Q0KIF4;D1YSF9;Q59DQ4	Dorsal (1)	0.807693	0.81731
3680	CG7598	Probable complex I intermediate-associated protein 30, mitochondrial	Q9VAI1	Q9VAI1	Dorsal (1)	0.826004	0.807804
3802	PQBP1		Q9VBY6	Q9VBY6	Dorsal (1)	0.84135	0.817752
3824	Ppox		Q9VC52	Q9VC52	Dorsal (1)	0.873453	0.844934
3903	Dph5		Q9VCY2	Q9VCY2	Dorsal (1)	0.819789	0.795204
3934	Usp8	Ubiquitin carboxyl-terminal hydrolase	Q9VDD8	Q9VDD8	Dorsal (1)	0.864789	0.835483
3956	CG15922-RA		Q9VDL5	Q9VDL5	Dorsal (1)	0.846467	0.843444
3995			Q9VE58	Q9VE58	Dorsal (1)	0.769053	0.778747
3996	CG7687		Q9VE69;Q8MQJ5;A0A0B4KGF5	Q9VE69;Q8MQJ5;A0A0B4KGF5	Dorsal (1)	0.85711	0.830979
4025			Q9VEF0	Q9VEF0	Dorsal (1)	0.856404	0.839507
4035	CREG		Q9VEK7;Q8IN97	Q9VEK7;Q8IN97	Dorsal (1)	0.844429	0.786685
4055			Q9VET3	Q9VET3	Dorsal (1)	0.821175	0.77756
4093	Sra-1	Cytoplasmic FMR1-interacting protein	Q9VF87	Q9VF87	Dorsal (1)	0.845467	0.818133
4122			Q9VFM0	Q9VFM0	Dorsal (1)	0.486472	0.635472
4132	omd		Q9VFS6	Q9VFS6	Dorsal (1)	0.852681	0.845984
4156	Dtg		Q9VG45	Q9VG45	Dorsal (1)	0.584226	0.60889
4159			Q9VG60	Q9VG60	Dorsal (1)	0.831347	0.826072
4167			Q9VG81	Q9VG81	Dorsal (1)	0.86177	0.818204
4186	GC1		Q9VGF7	Q9VGF7	Dorsal (1)	0.85097	0.824271
4198	fabp		Q9VGM2;Q8INK3;Q8INK2	Q9VGM2;Q8INK3;Q8INK2	Dorsal (1)	0.806135	0.790912
4208	KP78a		Q9VGP9	Q9VGP9	Dorsal (1)	0.81184	0.790162
4216	Ugt86Da		Q9VGT3	Q9VGT3	Dorsal (1)	0.819456	0.792014
4237			Q9VH13	Q9VH13	Dorsal (1)	0.790367	0.763543
4242			Q9VH37	Q9VH37	Dorsal (1)	0.763324	0.749717
4252		Mannose-6-phosphate isomerase	Q9VH77	Q9VH77	Dorsal (1)	0.821999	0.801065
4266	Vps45		Q9VHB5	Q9VHB5	Dorsal (1)	0.852179	0.826883
4269	trmt44	Probable tRNA (uracil-O(2)-)-methyltransferase	Q9VHB9	Q9VHB9	Dorsal (1)	0.846347	0.834214
4360	CG1234	Nucleolar complex protein 3 homolog	Q9VI82	Q9VI82	Dorsal (1)	0.833965	0.842759
4466	CG7200	JmjC domain-containing protein 4 homolog	X2JEJ1;Q9VJ97	X2JEJ1;Q9VJ97	Dorsal (1)	0.850752	0.844194
4497	RpL24	60S ribosomal protein L24	X2JE06;Q9VJY6	X2JE06;Q9VJY6	Dorsal (1)	0.804492	0.793849
4582	CG17118		Q9VKR2	Q9VKR2	Dorsal (1)	0.7676	0.745811
4586			Q9VKU5	Q9VKU5	Dorsal (1)	0.832979	0.809169
4587	Grip75	Gamma-tubulin complex component 4 homolog	Q9VKU7	Q9VKU7	Dorsal (1)	0.855648	0.825984
4595	RfC3		Q9VKW3	Q9VKW3	Dorsal (1)	0.860554	0.837264
4602	CG4972-RA	Nicalin	Q9VKZ7	Q9VKZ7	Dorsal (1)	0.828378	0.823285
4659			Q9VLM7	Q9VLM7	Dorsal (1)	0.835024	0.830848
4665	CG7787	Guanine nucleotide exchange factor MSS4 homolog	Q9VLP3	Q9VLP3	Dorsal (1)	0.834443	0.8086
4684	mon2	Protein MON2 homolog	X2J564;Q9VLT1	X2J564;Q9VLT1	Dorsal (1)	0.845021	0.838094
4688			X2JDI9;Q9VLU3	X2JDI9;Q9VLU3	Dorsal (1)	0.796883	0.679524
4702	CG5181	SOSS complex subunit B homolog	Q9VM17	Q9VM17	Dorsal (1)	0.863871	0.844971
4738	Fbw5		Q9VMI1	Q9VMI1	Dorsal (1)	0.819935	0.82377
4773	CG3792	Mannose-P-dolichol utilization defect 1 protein homolog	Q9VMW8	Q9VMW8	Dorsal (1)	0.800241	0.753863
4781	DhpD		Q9VMY9	Q9VMY9	Dorsal (1)	0.826281	0.80522
4857	P5CDh1		Q9VNX4	Q9VNX4	Dorsal (1)	0.864411	0.845184
4929	Ipk2		Q9VPR6	Q9VPR6	Dorsal (1)	0.863941	0.842082
5008	CG17593-RA		Q9VQR9	Q9VQR9	Dorsal (1)	0.820506	0.816243
5101	Trn		Q9VRV8	Q9VRV8	Dorsal (1)	0.857347	0.836666
5232	PCID2	PCI domain-containing protein 2 homolog	Q9VTL1	Q9VTL1	Dorsal (1)	0.819723	0.816723
5256			Q9VTW1;X2JB05;Q9VTW0;X2JGL7	Q9VTW1;X2JB05;Q9VTW0;X2JGL7	Dorsal (1)	0.828003	0.832042
5264	ver		Q9VTZ2	Q9VTZ2	Dorsal (1)	0.469705	0.598056
5372			Q9VVA9	Q9VVA9	Dorsal (1)	0.808953	0.789208
5408			Q9VVP9	Q9VVP9	Dorsal (1)	0.470692	0.605452
5452	Grasp65		Q9VW57	Q9VW57	Dorsal (1)	0.85695	0.831881
5460			Q9VW84	Q9VW84	Dorsal (1)	0.768597	0.782976
5495	CG7889-RA		Q9VWJ9	Q9VWJ9	Dorsal (1)	0.856167	0.819345
5553			Q9VX87	Q9VX87	Dorsal (1)	0.644751	0.757063
5582	CG9917-RA		Q9VXH7	Q9VXH7	Dorsal (1)	0.847935	0.81749
5624			Q9VXV4	Q9VXV4	Dorsal (1)	0.81026	0.821332
5625	Scamp		Q9VXV6	Q9VXV6	Dorsal (1)	0.848601	0.810551
5648	l(1)G0007		Q9VY54;Q9VY50	Q9VY54	Dorsal (1)	0.864987	0.838877
5650	AMPdeam		Q9VY76;Q76NR0;M9NDW2	Q9VY76;Q76NR0	Dorsal (1)	0.873289	0.822255
5734			Q9VZ34	Q9VZ34	Dorsal (1)	0.820867	0.816115
5746	Imp		Q9VZ69	Q9VZ69	Dorsal (1)	0.773485	0.739837
5798			Q9VZX8	Q9VZX8	Dorsal (1)	0.782309	0.778046
5825	RpL23A		Q9W0A8	Q9W0A8	Dorsal (1)	0.82348	0.804434
5839			Q9W0E2	Q9W0E2	Dorsal (1)	0.870799	0.828836
5912	gek	Serine/threonine-protein kinase Genghis Khan	Q9W1B0	Q9W1B0	Dorsal (1)	0.847878	0.84056
6024	BTBD9		Q9W2S3	Q9W2S3	Dorsal (1)	0.831975	0.819683
6032	CG2974	NAD(P)H-hydrate epimerase	Q9W2Y3	Q9W2Y3	Dorsal (1)	0.838055	0.815427
6072			Q9W3C8	Q9W3C8	Dorsal (1)	0.876611	0.826195
6092			Q9W3J9	Q9W3J9	Dorsal (1)	0.82231	0.804252
6118	CG32736	Small integral membrane protein 4	Q9W3T5	Q9W3T5	Dorsal (1)	0.841527	0.777546
6133			Q9W3X3	Q9W3X3	Dorsal (1)	0.820665	0.832973
6168	lin-52		Q9W482	Q9W482	Dorsal (1)	0.830818	0.796749
6229	EG:67A9.2		Q9W526	Q9W526	Dorsal (1)	0.798017	0.79376
2498			Q7JX94	Q7JX94	Dorsal (1)	0.458208	0.458208
2611			Q7K2Q5	Q7K2Q5	Dorsal (1)	0.471331	0.61862
6259			Q9W5T4;A0A0B4LFP2	Q9W5T4;A0A0B4LFP2	Dorsal (1)	0.829583	0.804556
4894			Q9VPE0	Q9VPE0	Dorsal (1)	0.527579	0.527579
6248	CG43867	Uncharacterized protein CG43867	X2JDC1;Q9W5D0	X2JDC1;Q9W5D0	Dorsal (1)	0.698043	0.684016
6271	Nc	Caspase Nc;Caspase Nc subunit 1;Caspase Nc subunit 2	Q9XYF4	Q9XYF4	Dorsal (1)	0.843325	0.845907
4629	BEST:CK01296		Q9VL69	Q9VL69	Dorsal (1)	0.81995	0.833039
4573	CG33129		Q9VKM8	Q9VKM8	Dorsal (1)	0.737979	0.826953
4418	CG18094-RA		Q9VIV5	Q9VIV5	Dorsal (1)	0.646775	0.800432
4417	CG10189	Cytoplasmic tRNA 2-thiolation protein 2	Q9VIV3	Q9VIV3	Dorsal (1)	0.833617	0.849212
4057	CG14883-RA		Q9VEU9	Q9VEU9	Dorsal (1)	0.801043	0.813843
3841	jnj		Q9VCB8	Q9VCB8	Dorsal (1)	0.817955	0.826551
3675	ca		Q9VAG5	Q9VAG5	Dorsal (1)	0.80038	0.81627
3617	Src42A	Tyrosine-protein kinase Src42A	Q9V9J3	Q9V9J3	Dorsal (1)	0.830003	0.851411
3595	Taz	Tafazzin homolog	Q9V6G5;A0A0B4JD45	Q9V6G5;A0A0B4JD45	Dorsal (1)	0.794069	0.827994
3220			Q8T007;Q9VGL7	Q8T007;Q9VGL7	Dorsal (1)	0.723625	0.766366
3156			Q8SX81	Q8SX81	Dorsal (1)	0.82099	0.839363
2487			Q7JWI7	Q7JWI7	Dorsal (1)	0.680874	0.821887
2484	mRpL52	39S ribosomal protein L52, mitochondrial	Q7JWG9	Q7JWG9	Dorsal (1)	0.822516	0.833814
2336			Q4V604	Q4V604	Dorsal (1)	0.697255	0.845649
2247	betaggt-I		Q24173;M9PEL6	Q24173;M9PEL6	Dorsal (1)	0.803475	0.816172
2120	smid		P91638	P91638	Dorsal (1)	0.833167	0.829488
1619	klar		M9PGK7;Q7YU15;Q9W0Q4;A8JNH2;M9PBH0;X2J8G9;M9PDJ0;X2JAH4;A8JNH1	M9PGK7;Q7YU15;Q9W0Q4;A8JNH2	Dorsal (1)	0.747448	0.827756
1409	Vap-33B		Q9VRR4;Q8I935;M9PBR6;Q8I934	Q9VRR4;Q8I935;M9PBR6;Q8I934	Dorsal (1)	0.78205	0.847145
1275	l(2)35Bc	tRNA(His) guanylyltransferase;Probable tRNA(His) guanylyltransferase	M9MSI6;Q9V3N8	M9MSI6;Q9V3N8	Dorsal (1)	0.67794	0.819196
1114	CG2162-RB		E1JIB4;Q9VZW2;Q8MRH9	E1JIB4;Q9VZW2;Q8MRH9	Dorsal (1)	0.805798	0.79953
1070	CG8920-RD;CG8920-RC		E1JGN5;Q0E910;Q7KN83;D5AEP3	E1JGN5;Q0E910;Q7KN83;D5AEP3	Dorsal (1)	0.675441	0.825687
525			A0A126GUX4	A0A126GUX4	Dorsal (1)	0.781475	0.761456
168	Atg9		Q7JQL5;A0A0B4KF86	Q7JQL5;A0A0B4KF86	Dorsal (1)	0.782208	0.817241
79	cnc	Segmentation protein capncollar	A0A0B4K6Z0;A0A0B4K6G8;A0A0B4KGT0;A0A0B4K6E1;A0A0B4KHP5;P20482	A0A0B4K6Z0;A0A0B4K6G8;A0A0B4KGT0;A0A0B4K6E1;A0A0B4KHP5;P20482	Dorsal (1)	0.701333	0.835589
5446	Fibp		Q9VW45;M9PFY4	Q9VW45	Dorsal (1)	0.771668	0.824547
6322	pgant3	Polypeptide N-acetylgalactosaminyltransferase 3	Q9Y117	Q9Y117	Dorsal (1)	0.804659	0.811118
16	Syx1A	Syntaxin-1A	A0A126GV04;A0A0B4JCZ4;Q24547	A0A126GV04;A0A0B4JCZ4;Q24547	Dorsal (1)	0.819165	0.823351
50	CG9603	Probable cytochrome c oxidase subunit 7A, mitochondrial	A0A0B4K6C3;Q9VHS2	A0A0B4K6C3;Q9VHS2	Lateral (2)	0.718844	0.69927
5253	Adk1		Q9VTV3;Q8IQG9	Q9VTV3;Q8IQG9	Lateral (2)	0.705258	0.659435
5263	Gcn5		Q9VTZ1	Q9VTZ1	Lateral (2)	0.793296	0.778863
5310			Q9VUI8;M9NE98	Q9VUI8;M9NE98	Lateral (2)	0.747501	0.724546
5327			Q9VUR2	Q9VUR2	Lateral (2)	0.749239	0.73617
5352			Q9VV47	Q9VV47	Lateral (2)	0.739929	0.698134
5382	rogdi	Protein rogdi	Q9VVE2	Q9VVE2	Lateral (2)	0.774018	0.743253
5413	MED11	Mediator of RNA polymerase II transcription subunit 11	Q9VVS4	Q9VVS4	Lateral (2)	0.791444	0.75277
5517	CG15047-RA		Q9VWS7	Q9VWS7	Lateral (2)	0.733228	0.72395
5550	baz		Q9VX75;X2JFU8;X2JCB3;Q0KHR3	Q9VX75;X2JFU8;X2JCB3;Q0KHR3	Lateral (2)	0.801582	0.753834
5654	Pdcd4		Q9VY91	Q9VY91	Lateral (2)	0.791262	0.761572
5717	Kmn1		Q9VYX4	Q9VYX4	Lateral (2)	0.713086	0.729835
5749			Q9VZC8	Q9VZC8	Lateral (2)	0.700898	0.687171
5765	Chd64	Transgelin	Q9VZI1;M9PE30	Q9VZI1;M9PE30	Lateral (2)	0.719852	0.712826
5821	mRpL46		Q9W086	Q9W086	Lateral (2)	0.770191	0.753032
5844	msd1		Q9W0G7	Q9W0G7	Lateral (2)	0.795286	0.758895
5856			Q9W0M4	Q9W0M4	Lateral (2)	0.7673	0.732564
5880	BcDNA:GH03108		Q9W0X8	Q9W0X8	Lateral (2)	0.763336	0.749322
5887			Q9W112	Q9W112	Lateral (2)	0.768333	0.736769
5890	ND-19		Q9W125	Q9W125	Lateral (2)	0.790051	0.746065
5900	uri		Q9W148	Q9W148	Lateral (2)	0.797719	0.769254
5935	shu	Inactive peptidyl-prolyl cis-trans isomerase shutdown	Q9W1I9	Q9W1I9	Lateral (2)	0.698198	0.714184
5943	mi		Q9W1N8	Q9W1N8	Lateral (2)	0.774382	0.768158
5983	GM130		Q9W289	Q9W289	Lateral (2)	0.793698	0.758689
5986			Q9W298	Q9W298	Lateral (2)	0.802133	0.768507
5989	Tim10	Mitochondrial import inner membrane translocase subunit Tim10	Q9W2D6	Q9W2D6	Lateral (2)	0.77732	0.750548
6006	Sgf29		Q9W2I4	Q9W2I4	Lateral (2)	0.799485	0.75595
6023	Atg8a		Q9W2S2;X2JJA8;X2JEE0	Q9W2S2	Lateral (2)	0.768666	0.766671
6040			Q9W333	Q9W333	Lateral (2)	0.738251	0.718842
6043	c12.2		Q9W347;M9PHH0	Q9W347;M9PHH0	Lateral (2)	0.779893	0.738369
6057	fh	Frataxin homolog, mitochondrial	Q9W385	Q9W385	Lateral (2)	0.794119	0.760636
6068	CG1785	Uncharacterized protein CG1785	Q9W3C2	Q9W3C2	Lateral (2)	0.756137	0.717091
6085			X2JEI6;Q9W3G7	X2JEI6;Q9W3G7	Lateral (2)	0.720248	0.680101
6114			Q9W3S3	Q9W3S3	Lateral (2)	0.740665	0.7026
6139			Q9W3Y3	Q9W3Y3	Lateral (2)	0.769883	0.755357
6184	Pp2C1		Q9W4H8	Q9W4H8	Lateral (2)	0.797413	0.753394
6223	temp		Q9W501	Q9W501	Lateral (2)	0.769019	0.725395
6225	EG:17E2.1		Q9W511	Q9W511	Lateral (2)	0.768588	0.745692
6247	TRAM	Translocating chain-associated membrane protein	Q9W5C2	Q9W5C2	Lateral (2)	0.624521	0.742309
6255	MED21	Mediator of RNA polymerase II transcription subunit 21	Q9W5P1	Q9W5P1	Lateral (2)	0.774896	0.729289
6278	mre11		Q9XYZ4	Q9XYZ4	Lateral (2)	0.780532	0.763592
6293			Q9XZ22	Q9XZ22	Lateral (2)	0.776762	0.752534
3793	danr	Protein distal antenna-related	Q9VBW9	Q9VBW9	Lateral (2)	0.541246	0.666658
3832			Q9VC66	Q9VC66	Lateral (2)	0.780121	0.767563
3892			Q9VCV3	Q9VCV3	Lateral (2)	0.71406	0.697306
3906			Q9VD02	Q9VD02	Lateral (2)	0.765169	0.770186
3910			Q9VD14	Q9VD14	Lateral (2)	0.766823	0.75392
3972	Naam		Q9VDU7	Q9VDU7	Lateral (2)	0.75203	0.744149
1824	cib		O97428;Q8IRS7	O97428;Q8IRS7	Lateral (2)	0.726971	0.714097
3982	CG11779-RB	Mitochondrial import inner membrane translocase subunit TIM44	Q9VDZ8;Q9VDZ7	Q9VDZ8;Q9VDZ7	Lateral (2)	0.79093	0.770431
3988			Q9VE12	Q9VE12	Lateral (2)	0.759941	0.732684
4157	Snx3		Q9VG51	Q9VG51	Lateral (2)	0.764396	0.743327
4178	Spt3		Q9VGE2	Q9VGE2	Lateral (2)	0.732356	0.708256
4227			Q9VGY8	Q9VGY8	Lateral (2)	0.689035	0.673075
4233			Q9VH00	Q9VH00	Lateral (2)	0.711657	0.689257
4297	E(var)3-9		Q9VHJ3	Q9VHJ3	Lateral (2)	0.77705	0.774754
1842	Yp2	Vitellogenin-2	X2JB25;P02844	X2JB25;P02844	Lateral (2)	0.738888	0.719837
4320	Atg13	Autophagy-related protein 13 homolog	Q9VHR6	Q9VHR6	Lateral (2)	0.766296	0.751867
4399	Taf13		Q9VIP1	Q9VIP1	Lateral (2)	0.744951	0.684273
4444	Nedd8	NEDD8	X2J935;Q9VJ33	X2J935;Q9VJ33	Lateral (2)	0.76433	0.723842
4510			Q9VK20	Q9VK20	Lateral (2)	0.765766	0.714418
4571	YL-1	Vacuolar protein sorting-associated protein 72 homolog	X2JA36;Q9VKM6	X2JA36;Q9VKM6	Lateral (2)	0.779759	0.724649
4576			Q9VKP5	Q9VKP5	Lateral (2)	0.763419	0.733268
4605	CG4968	Ubiquitin thioesterase otubain-like	Q9VL00	Q9VL00	Lateral (2)	0.790802	0.756455
1850	RpLP2	60S acidic ribosomal protein P2	P05389	P05389	Lateral (2)	0.73781	0.655672
4653	fu2		Q9VLK8	Q9VLK8	Lateral (2)	0.771606	0.741083
1857	Yp3	Vitellogenin-3	X2JEX8;P06607;Q4V566;Q9VPH3;M9NFL7	X2JEX8;P06607	Lateral (2)	0.749763	0.732825
4683	CG12375	Beta-lactamase-like protein 2 homolog	Q9VLS9	Q9VLS9	Lateral (2)	0.799308	0.761388
1923	ci	Transcriptional activator cubitus interruptus;Transcriptional repressor cubitus interruptus	P19538;H9XVL7;H9XVL6;A0A0B4KEP0;A0A0B4KGM2;Q962I0;Q7K0S9	P19538;H9XVL7	Lateral (2)	0.760525	0.725736
4692	SmE	Probable small nuclear ribonucleoprotein E	Q9VLV5	Q9VLV5	Lateral (2)	0.742307	0.727347
4709	Rab30		Q9VM50	Q9VM50	Lateral (2)	0.774744	0.775175
4714	Gas41		Q9VM63	Q9VM63	Lateral (2)	0.766186	0.748574
4723			Q9VMB3	Q9VMB3	Lateral (2)	0.668992	0.630334
4725	COX5B		Q9VMB9	Q9VMB9	Lateral (2)	0.747924	0.722093
4761	CG12512-RA		Q9VMR6	Q9VMR6	Lateral (2)	0.754624	0.738606
4807			Q9VNB2	Q9VNB2	Lateral (2)	0.79551	0.732203
4810	Snm1		Q9VND2	Q9VND2	Lateral (2)	0.702506	0.696409
1877	Hsc70-2	Heat shock 70 kDa protein cognate 2	P11146	P11146	Lateral (2)	0.593571	0.698932
4819			Q9VNE8	Q9VNE8	Lateral (2)	0.732138	0.750216
4861	Als2		Q9VNZ8	Q9VNZ8	Lateral (2)	0.778291	0.730952
4899	CG5199-RA		Q9VPF1	Q9VPF1	Lateral (2)	0.786365	0.744792
4954	mRpL48		Q9VQ35	Q9VQ35	Lateral (2)	0.756059	0.735187
4979	Bacc		Q9VQF7	Q9VQF7	Lateral (2)	0.676034	0.717126
4981	snapin	SNAPIN protein homolog	Q9VQF9	Q9VQF9	Lateral (2)	0.750246	0.691186
1931	GstD1	Glutathione S-transferase 1-1	P20432	P20432	Lateral (2)	0.669288	0.623205
5046			Q9VR62	Q9VR62	Lateral (2)	0.768406	0.736912
1936	sca	Protein scabrous	P21520	P21520	Lateral (2)	0.659599	0.566984
5183	aay	Phosphoserine phosphatase	Q9VSY6	Q9VSY6	Lateral (2)	0.732137	0.725664
5186			Q9VSZ2	Q9VSZ2	Lateral (2)	0.758472	0.745535
3762			Q9VBI0	Q9VBI0	Lateral (2)	0.780604	0.733855
3741			Q9VB51	Q9VB51	Lateral (2)	0.714819	0.687562
214	CG5098	Uncharacterized protein CG5098	A0A126GUN5;A0A0B4KFU8;Q6AWG9	A0A126GUN5;A0A0B4KFU8;Q6AWG9	Lateral (2)	0.772044	0.759044
161	Vps28	Vacuolar protein sorting-associated protein 28 homolog	A0A0B4KF05;Q9V359	A0A0B4KF05;Q9V359	Lateral (2)	0.788487	0.743517
282	Sur-8	Leucine-rich repeat protein soc-2 homolog	A0A0B4KHN4;A0A0B4KHA2;Q9VEK6	A0A0B4KHN4;A0A0B4KHA2;Q9VEK6	Lateral (2)	0.739654	0.748305
3722	CG12259	Protein FAM50 homolog	Q9VAY7	Q9VAY7	Lateral (2)	0.79171	0.768616
3701	CG11880	CTL-like protein 2	Q9VAP3	Q9VAP3	Lateral (2)	0.794222	0.745161
2015	swa	Protein swallow	P40688	P40688	Lateral (2)	0.746509	0.688215
1945	Hsf	Heat shock factor protein	Q4H2F8;Q4H2F9;Q4H2F7;P22813	Q4H2F8;Q4H2F9;Q4H2F7;P22813	Lateral (2)	0.75607	0.748283
140	E(Pc)	Enhancer of polycomb-like protein	A0A0B4KEK1;Q0E9C2;A0A0B4KET9;A0A0B4KFP2	A0A0B4KEK1;Q0E9C2;A0A0B4KET9;A0A0B4KFP2	Lateral (2)	0.757032	0.72837
2055	pr	6-pyruvoyl tetrahydrobiopterin synthase	P48611	P48611	Lateral (2)	0.755739	0.73876
3662			Q9VAB8	Q9VAB8	Lateral (2)	0.701678	0.721086
118	CanB2;CanB	Calcineurin subunit B type 2;Calcineurin subunit B type 1	A0A0B4K833;Q24214;M9NFW6;P48451	A0A0B4K833;Q24214;M9NFW6;P48451	Lateral (2)	0.758907	0.750338
2179			Q0E8X8	Q0E8X8	Lateral (2)	0.779722	0.761025
2200	Drak	Death-associated protein kinase related	Q0KHT7	Q0KHT7	Lateral (2)	0.739896	0.73947
2209			Q0KI15	Q0KI15	Lateral (2)	0.789203	0.780589
1822	ND-B14.5A		O97418	O97418	Lateral (2)	0.725077	0.700269
77	unk	RING finger protein unkempt	A0A0B4K6Y4;Q86B79	A0A0B4K6Y4;Q86B79	Lateral (2)	0.757893	0.751377
2272	Oscp	ATP synthase subunit O, mitochondrial	Q24439	Q24439	Lateral (2)	0.748447	0.74187
3646	CG1542	Probable rRNA-processing protein EBP2 homolog	Q9V9Z9	Q9V9Z9	Lateral (2)	0.764718	0.746015
2306	CG33977-RA		Q2PDR0	Q2PDR0	Lateral (2)	0.718856	0.733839
2331			Q4V4H7	Q4V4H7	Lateral (2)	0.741124	0.728045
3644	mRpL32	39S ribosomal protein L32, mitochondrial	Q9V9Z1	Q9V9Z1	Lateral (2)	0.729861	0.736672
5211			Q9VTB3	Q9VTB3	Lateral (2)	0.799215	0.776105
5235	pallidin	Biogenesis of lysosome-related organelles complex 1 subunit 6	Q9VTM0	Q9VTM0	Lateral (2)	0.748839	0.729469
2405	Meltrin		Q6QU65;Q400M8	Q6QU65;Q400M8	Lateral (2)	0.736441	0.746043
6341	Orc6	Origin recognition complex subunit 6	Q9Y1B2	Q9Y1B2	Lateral (2)	0.801738	0.772195
3626	FeCh	Ferrochelatase, mitochondrial	Q9V9S8	Q9V9S8	Lateral (2)	0.792077	0.766921
2409	sPLA2		Q6XPX3;Q8SZB2	Q6XPX3;Q8SZB2	Lateral (2)	0.774922	0.744648
2451			Q7JUN9	Q7JUN9	Lateral (2)	0.737138	0.689133
2496	kermit		Q7JX82	Q7JX82	Lateral (2)	0.67884	0.688491
2544			Q7K0D3	Q7K0D3	Lateral (2)	0.791947	0.74089
359	CG7686	Protein LTV1 homolog	A0A0B4LF59;Q7KN79	A0A0B4LF59;Q7KN79	Lateral (2)	0.728004	0.716549
391	MESR4		A0A0B4LGV3;A0A0B4LFV9;A1ZAV3	A0A0B4LGV3;A0A0B4LFV9;A1ZAV3	Lateral (2)	0.76346	0.751024
420	Galphas	G protein alpha s subunit	A0A0B4LGI1;P20354	A0A0B4LGI1;P20354	Lateral (2)	0.791241	0.74151
559	Vps13		A1Z713	A1Z713	Lateral (2)	0.80039	0.779238
695			A1ZAY5	A1ZAY5	Lateral (2)	0.71151	0.685654
798	DIP1		Q8MRC7;Q9W5S7;Q9U4F5;A4V4V2;Q9TW27;Q9TW12	Q8MRC7;Q9W5S7;Q9U4F5;A4V4V2;Q9TW27;Q9TW12	Lateral (2)	0.771932	0.742896
806	ND-MWFE		A8DYC5;A8DYC4	A8DYC5;A8DYC4	Lateral (2)	0.748369	0.709539
835	lqf		M9PEM7;M9PBU6;A8JNM3;Q7KU93;M9PEF2;Q7KU90;Q9VS85	M9PEM7;M9PBU6;A8JNM3;Q7KU93;M9PEF2;Q7KU90;Q9VS85	Lateral (2)	0.808787	0.774702
922	drongo		B7Z005;Q9VPU3;E1JHR0;Q8MRM4;E1JHR1	B7Z005;Q9VPU3;E1JHR0;Q8MRM4;E1JHR1	Lateral (2)	0.594733	0.695454
986	Ald-RC;Ald	Fructose-bisphosphate aldolase	C8VV14;P07764	C8VV14;P07764	Lateral (2)	0.749176	0.713147
1064	CG7115-RB		D8FT19;M9PCH3;Q9XZ28	D8FT19;M9PCH3;Q9XZ28	Lateral (2)	0.748835	0.759575
1120			Q961C3;Q9VH75;E1JIH4	Q961C3;Q9VH75;E1JIH4	Lateral (2)	0.781302	0.751119
1165	bin3	Probable RNA methyltransferase bin3	E2QC61;Q7K480	E2QC61;Q7K480	Lateral (2)	0.762163	0.720911
1208	RpS3	40S ribosomal protein S3	G3M3A2;Q06559	G3M3A2;Q06559	Lateral (2)	0.764151	0.749852
1262	Pka-R1	cAMP-dependent protein kinase type I regulatory subunit	M9MRY3;P16905;M9MS72;M9MS37;H1UUF3;Q9VPA7;M9MS76	M9MRY3;P16905;M9MS72;M9MS37;H1UUF3;Q9VPA7;M9MS76	Lateral (2)	0.704235	0.703297
1373	Wee1;wee	Wee1-like protein kinase	M9PB57;P54350	M9PB57;P54350	Lateral (2)	0.814569	0.776267
1437			Q0E8S5;M9PCE7;M9PEZ6;M9PCT0	Q0E8S5;M9PCE7;M9PEZ6;M9PCT0	Lateral (2)	0.577688	0.710809
1467	Usp32	Ubiquitin carboxyl-terminal hydrolase	M9PFQ1;M9PD06;M9PG46;M9PFZ0	M9PFQ1;M9PD06;M9PG46;M9PFZ0	Lateral (2)	0.765429	0.773592
1481	RanGAP		M9PD65	M9PD65	Lateral (2)	0.579496	0.699147
1534			M9PES8	M9PES8	Lateral (2)	0.777168	0.766088
1577	CG9705	Cold shock domain-containing protein CG9705	M9PFS8;Q9VVA0	M9PFS8;Q9VVA0	Lateral (2)	0.762698	0.756842
1638	sog	Dorsal-ventral patterning protein Sog	M9PH73;Q24025	M9PH73;Q24025	Lateral (2)	0.568703	0.54158
1723	Vinc	Vinculin	X2JAB9;O46037	X2JAB9;O46037	Lateral (2)	0.807559	0.780393
1735	bcn92	Protein bcn92	O46098	O46098	Lateral (2)	0.788009	0.781841
5241	RpL10Ab	60S ribosomal protein L10a-2	Q9VTP4	Q9VTP4	Lateral (2)	0.742947	0.734396
1983	Tpi	Triosephosphate isomerase	P29613	P29613	Lateral (2)	0.75221	0.723435
1732	Pex5		Q7KW08;O46085	Q7KW08;O46085	Lateral (2)	0.771745	0.750523
1721	qkr58E-3		O44434	O44434	Lateral (2)	0.766373	0.745556
1585	Mkp3	Dual specificity protein phosphatase;Dual specificity protein phosphatase Mpk3	M9PFW0;M9PG13;Q9VVW5	M9PFW0;M9PG13;Q9VVW5	Lateral (2)	0.774713	0.726032
1570	fz	Frizzled	M9PFL6;P18537	M9PFL6;P18537	Lateral (2)	0.762691	0.726899
1517	RpS21	40S ribosomal protein S21	M9PEA6;O76927	M9PEA6;O76927	Lateral (2)	0.766968	0.743381
1470	spict		Q9VK62;M9PD12	Q9VK62;M9PD12	Lateral (2)	0.653482	0.69038
1458	chico	Insulin receptor substrate 1	M9PCQ8;Q9XTN2	M9PCQ8;Q9XTN2	Lateral (2)	0.746524	0.749713
1377	bib	Neurogenic protein big brain	M9PB86;P23645	M9PB86;P23645	Lateral (2)	0.758552	0.744375
1322	Hsp23	Heat shock protein 23	M9NE68;P02516	M9NE68;P02516	Lateral (2)	0.655311	0.684957
1251	Sh3beta	SH3 domain-binding glutamic acid-rich protein homolog	M9MSK4;M9MRQ6;Q9NFP5;M9MRR7	M9MSK4;M9MRQ6;Q9NFP5;M9MRR7	Lateral (2)	0.774668	0.755364
1171	Gs1l		E2QCN9	E2QCN9	Lateral (2)	0.733792	0.708339
1157	ben	Ubiquitin-conjugating enzyme E2 N	E1JJN1;P35128;Q9VJS5	E1JJN1;P35128	Lateral (2)	0.71622	0.718827
1076			E1JGZ3	E1JGZ3	Lateral (2)	0.739691	0.700302
1040	AMPdeam-RJ;AMPdeam		D0IQK3;Q961Q7	D0IQK3;Q961Q7	Lateral (2)	0.720952	0.689983
967	BcDNA:LD21969		Q9VI18;B9A0M7	Q9VI18;B9A0M7	Lateral (2)	0.788037	0.731845
895	Neu2		B6VQ99;M9PFW2	B6VQ99;M9PFW2	Lateral (2)	0.721597	0.704537
813			A8DYU2;A8DYU1;A8DYU3;R9PY62;R9PY34;M9NE71	A8DYU2;A8DYU1;A8DYU3;R9PY62;R9PY34	Lateral (2)	0.74919	0.721473
805			A8DYB0	A8DYB0	Lateral (2)	0.768678	0.763972
751	CaMKII		A4V134;A4V133;L0MNA2	A4V134;A4V133;L0MNA2	Lateral (2)	0.587709	0.693919
639	arr		A1Z9D7	A1Z9D7	Lateral (2)	0.683094	0.672474
551	koi		A1Z6Q0;A4UZ58	A1Z6Q0;A4UZ58	Lateral (2)	0.718678	0.692428
419		Oxysterol-binding protein	Q9W1D9;A0A0B4LGH8	Q9W1D9;A0A0B4LGH8	Lateral (2)	0.75244	0.738931
361	CG4646	UPF0587 protein CG4646	A0A0B4LF92;A1Z9A2	A0A0B4LF92;A1Z9A2	Lateral (2)	0.740772	0.725239
358	Cam	Calmodulin	A0A0B4LF57;P62152	A0A0B4LF57;P62152	Lateral (2)	0.753631	0.742437
2555			Q7K0S1;H0RN96	Q7K0S1	Lateral (2)	0.765504	0.719993
307	mira		A0A0B4KHS3;Q8IN63	A0A0B4KHS3;Q8IN63	Lateral (2)	0.60646	0.708033
3598	Uba3	Nedd8-activating enzyme E1 catalytic subunit	Q9V6U8	Q9V6U8	Lateral (2)	0.766258	0.7551
2676	Ubc10		Q7K738	Q7K738	Lateral (2)	0.756441	0.748058
3801			Q9VBY5	Q9VBY5	Lateral (2)	0.750326	0.752255
3469	Srp54k		Q9V3D9	Q9V3D9	Lateral (2)	0.777527	0.771366
2758	Gli		Q7KT70	Q7KT70	Lateral (2)	0.663108	0.647288
2764			Q7KTG0	Q7KTG0	Lateral (2)	0.770054	0.731164
2780	CG7369-RA		Q7KTU3	Q7KTU3	Lateral (2)	0.748863	0.718168
3404			Q9I7W2	Q9I7W2	Lateral (2)	0.771818	0.702978
2847			Q7YU16;Q9VZN0	Q7YU16;Q9VZN0	Lateral (2)	0.7804	0.741915
2857	CG8611	Probable ATP-dependent RNA helicase CG8611	Q86B47;X2JKW3	Q86B47;X2JKW3	Lateral (2)	0.781236	0.751745
3342	Lrch		Q960C5;X2JA56;Q9VJE6	Q960C5;X2JA56;Q9VJE6	Lateral (2)	0.708828	0.709901
2905	CG2201-RB		Q9V9R4;Q8IMF4;Q2PDP3;Q8IMF3	Q9V9R4;Q8IMF4;Q2PDP3;Q8IMF3	Lateral (2)	0.757199	0.751167
3337	Galk		Q95U34	Q95U34	Lateral (2)	0.769677	0.752133
3312			Q95RX5	Q95RX5	Lateral (2)	0.792438	0.761233
3300	CG3426		Q95RP1	Q95RP1	Lateral (2)	0.732256	0.729624
3187			Q8SY58	Q8SY58	Lateral (2)	0.739087	0.714919
2969	dUTPase		Q8IPB1	Q8IPB1	Lateral (2)	0.729217	0.703629
3013			Q8IQM5	Q8IQM5	Lateral (2)	0.797104	0.752868
3100	BigH1		Q8MSC4	Q8MSC4	Lateral (2)	0.78937	0.75814
3130	Nf-YB		Q8ST61	Q8ST61	Lateral (2)	0.675016	0.661491
3169	TBPH		Q8SXP8;Q9W1I0	Q8SXP8;Q9W1I0	Lateral (2)	0.78567	0.749249
3805			Q9VBY9	Q9VBY9	Lateral (2)	0.778416	0.701329
4719	Aatf	Protein Aatf	Q9VM95	Q9VM95	Lateral (2)	0.753677	0.712739
3784	RIOK2		Q9VBU2	Q9VBU2	Lateral (2)	0.79218	0.720974
2239	shark	Tyrosine-protein kinase shark	Q24145	Q24145	Lateral (2)	0.728484	0.663055
3803	veli		Q9VBY7	Q9VBY7	Lateral (2)	0.786169	0.721132
1422	robo2		Q9VQ08;M9PC46	Q9VQ08;M9PC46	Lateral (2)	0.787755	0.733055
464	sra	Protein sarah	A0A0B4LHI3;Q9XZL8	A0A0B4LHI3;Q9XZL8	Ventral Tl10B (3)	0.752259	NaN
5979	wdp		Q9W266	Q9W266	Ventral Tl10B (3)	0.774558	NaN
5975	qkr58E-2		Q9W254	Q9W254	Ventral Tl10B (3)	0.752885	NaN
468	pre-mod(mdg4)-E		A0A0B4LHQ9	A0A0B4LHQ9	Ventral Tl10B (3)	0.702512	NaN
1276			M9MSJ7;M9PGW2;Q9W081	M9MSJ7	Ventral Tl10B (3)	0.656628	NaN
1342			M9NF18;Q9VYW5;M9NED4	M9NF18;Q9VYW5;M9NED4	Ventral Tl10B (3)	0.745954	NaN
1387	Hakai		Q8INW0;M9PBE2;Q9VIT1;Q8INV9	Q8INW0;M9PBE2;Q9VIT1;Q8INV9	Ventral Tl10B (3)	0.724296	NaN
1803	Ate1	Arginyl-tRNA--protein transferase 1	O96539	O96539	Ventral Tl10B (3)	0.733303	NaN
2146	SmB	Small nuclear ribonucleoprotein-associated protein B	Q05856	Q05856	Ventral Tl10B (3)	0.737983	NaN
2509	Vps25	Vacuolar protein-sorting-associated protein 25	Q7JXV9	Q7JXV9	Ventral Tl10B (3)	0.770246	NaN
2520			Q7JYZ0	Q7JYZ0	Ventral Tl10B (3)	0.674218	NaN
2673			Q7K5M2;A0A0B4LFE1	Q7K5M2;A0A0B4LFE1	Ventral Tl10B (3)	0.750417	NaN
3548	Mst85C		Q9V451	Q9V451	Ventral Tl10B (3)	0.711598	NaN
3755			Q9VBC6	Q9VBC6	Ventral Tl10B (3)	0.71728	NaN
4031			Q9VEH2	Q9VEH2	Ventral Tl10B (3)	0.740442	NaN
4127			Q9VFP5	Q9VFP5	Ventral Tl10B (3)	0.752263	NaN
4284	Ibf1		Q9VHG5;A0A0B4LGV6	Q9VHG5;A0A0B4LGV6	Ventral Tl10B (3)	0.747157	NaN
4538	RpL7-like		Q9VKC1	Q9VKC1	Ventral Tl10B (3)	0.746642	NaN
5049	Syx16		Q9VR90	Q9VR90	Ventral Tl10B (3)	0.761303	NaN
5301	CG13484-RA		Q9VUC4	Q9VUC4	Ventral Tl10B (3)	0.743213	NaN
5336			Q9VUV8	Q9VUV8	Ventral Tl10B (3)	0.737331	NaN
5432	Bet1		Q9VVX6	Q9VVX6	Ventral Tl10B (3)	0.719946	NaN
5607			Q9VXQ6	Q9VXQ6	Ventral Tl10B (3)	0.757395	NaN
5834			X2JG46;Q9W0D2	X2JG46;Q9W0D2	Ventral Tl10B (3)	0.69604	NaN
6042	l(1)G0320		Q9W335	Q9W335	Ventral Tl10B (3)	0.781005	NaN
6045	CG16892-RA		Q9W351	Q9W351	Ventral Tl10B (3)	0.762325	NaN
6054			Q9W380	Q9W380	Ventral Tl10B (3)	0.690093	NaN
6064	Rbm13		Q9W3B2	Q9W3B2	Ventral Tl10B (3)	0.780846	NaN
6077			Q9W3D5	Q9W3D5	Ventral Tl10B (3)	0.722481	NaN
6082	CG12125-RB		Q9W3F7	Q9W3F7	Ventral Tl10B (3)	0.770073	NaN
6084			Q9W3G1	Q9W3G1	Ventral Tl10B (3)	0.803075	NaN
6091	CG17982-RA		Q9W3J6	Q9W3J6	Ventral Tl10B (3)	0.774459	NaN
6098	l(1)G0193		Q9W3M4	Q9W3M4	Ventral Tl10B (3)	0.73694	NaN
6120			Q9W3T9	Q9W3T9	Ventral Tl10B (3)	0.802535	NaN
6123			Q9W3U9;X2JAQ5	Q9W3U9;X2JAQ5	Ventral Tl10B (3)	0.788899	NaN
6127	CG4542	Probable dolichyl pyrophosphate Glc1Man9GlcNAc2 alpha-1,3-glucosyltransferase	Q9W3V8	Q9W3V8	Ventral Tl10B (3)	0.583525	NaN
6141	APC7		Q9W3Y6;Q8IRQ6	Q9W3Y6;Q8IRQ6	Ventral Tl10B (3)	0.753114	NaN
6170	CG32758-RA		Q9W486;X2JIH1;F3YD98	Q9W486;X2JIH1;F3YD98	Ventral Tl10B (3)	0.781997	NaN
6178			X2JCL3;Q9W4D1	X2JCL3;Q9W4D1	Ventral Tl10B (3)	0.802233	NaN
6190			Q9W4J6	Q9W4J6	Ventral Tl10B (3)	0.782346	NaN
6194	CG3626-RA		Q9W4K8	Q9W4K8	Ventral Tl10B (3)	0.722376	NaN
6202			Q9W4N6	Q9W4N6	Ventral Tl10B (3)	0.771611	NaN
6203	Vap-33A		Q9W4N8;Q7KVX5	Q9W4N8;Q7KVX5	Ventral Tl10B (3)	0.81139	NaN
6215			Q9W4W8	Q9W4W8	Ventral Tl10B (3)	0.784324	NaN
6230	EG:22E5.7		Q9W531	Q9W531	Ventral Tl10B (3)	0.744172	NaN
6253	ebo		Q9W5G1;X2JDN0;X2J9Y4	Q9W5G1;X2JDN0;X2J9Y4	Ventral Tl10B (3)	0.766431	NaN
6319	BcDNA.GH10614		Q9Y112;Q9VZK8	Q9Y112	Ventral Tl10B (3)	0.763341	NaN
6329	CG7601	Dehydrogenase/reductase SDR family protein 7-like	Q9Y140	Q9Y140	Ventral Tl10B (3)	0.78126	NaN
6338	BcDNA.GH02220		Q9Y171	Q9Y171	Ventral Tl10B (3)	0.735127	NaN
6537	sesB	ADP,ATP carrier protein	X2JB48;Q26365	X2JB48;Q26365	Ventral Tl10B (3)	0.781688	NaN
5955	Nup214	Nuclear pore complex protein Nup214	Q9W1X4	Q9W1X4	Ventral Tl10B (3)	0.797108	NaN
5981			Q9W281	Q9W281	Ventral Tl10B (3)	0.735218	NaN
6029	Psf3		Q9W2V7	Q9W2V7	Ventral Tl10B (3)	0.794598	NaN
5949	CG3502-RB		Q9W1S1	Q9W1S1	Ventral Tl10B (3)	0.734129	NaN
5929	DCP1		Q9W1H5	Q9W1H5	Ventral Tl10B (3)	0.785456	NaN
5902			Q9W158	Q9W158	Ventral Tl10B (3)	0.811124	NaN
5901	CG11414-RA		Q9W149	Q9W149	Ventral Tl10B (3)	0.807662	NaN
5869	Cdc5		Q9W0R0	Q9W0R0	Ventral Tl10B (3)	0.781478	NaN
5806	CG9004	Nucleolar MIF4G domain-containing protein 1 homolog	Q9W020	Q9W020	Ventral Tl10B (3)	0.804918	NaN
5793	Sk2		Q9VZW0	Q9VZW0	Ventral Tl10B (3)	0.753178	NaN
5762	pav	Kinesin-like protein	Q9VZF5	Q9VZF5	Ventral Tl10B (3)	0.784596	NaN
5736	CG2145	Poly(U)-specific endoribonuclease homolog	X2JJD6;Q9VZ49	X2JJD6;Q9VZ49	Ventral Tl10B (3)	0.785518	NaN
5712			Q9VYW4	Q9VYW4	Ventral Tl10B (3)	0.808451	NaN
5695	Tango4		Q9VYQ9	Q9VYQ9	Ventral Tl10B (3)	0.79265	NaN
5669	CG1622-RA		Q9VYE9;M9PHQ4;X2JF51	Q9VYE9	Ventral Tl10B (3)	0.754297	NaN
5637	pdgy		Q9VXZ8	Q9VXZ8	Ventral Tl10B (3)	0.76555	NaN
5630			Q9VXW9;Q8IR40	Q9VXW9;Q8IR40	Ventral Tl10B (3)	0.770481	NaN
5623	shtd		Q9VXV3	Q9VXV3	Ventral Tl10B (3)	0.790045	NaN
5613			Q9VXR9	Q9VXR9	Ventral Tl10B (3)	0.622648	NaN
5605			Q9VXQ3	Q9VXQ3	Ventral Tl10B (3)	0.763006	NaN
5597	sun		Q9VXN2	Q9VXN2	Ventral Tl10B (3)	0.691454	NaN
5594	tay		X2JC54;Q9VXM5	X2JC54;Q9VXM5	Ventral Tl10B (3)	0.741389	NaN
5567	mthl1	Probable G-protein coupled receptor Mth-like 1	X2JC86;Q9VXD9	X2JC86;Q9VXD9	Ventral Tl10B (3)	0.751924	NaN
5526	Taf8	Transcription initiation factor TFIID subunit 8	Q9VWY6	Q9VWY6	Ventral Tl10B (3)	0.795994	NaN
5509	Pk17E		Q9VWQ2	Q9VWQ2	Ventral Tl10B (3)	0.759947	NaN
5496	Ulp1		Q9VWK5	Q9VWK5	Ventral Tl10B (3)	0.774336	NaN
5484	HspB8		Q9VWG1;Q8IQW5;M9NHC5	Q9VWG1;Q8IQW5;M9NHC5	Ventral Tl10B (3)	0.791296	NaN
5483	Shawn		Q9VWG0	Q9VWG0	Ventral Tl10B (3)	0.736598	NaN
5481	NAA20		Q9VWF5;M9PI14	Q9VWF5;M9PI14	Ventral Tl10B (3)	0.752318	NaN
5474	dome	Cytokine receptor	Q9VWE0	Q9VWE0	Ventral Tl10B (3)	0.798824	NaN
5473	Ubqn		Q9VWD9	Q9VWD9	Ventral Tl10B (3)	0.775235	NaN
5467	vfl		Q9VWC6;X2BZL0;M9NES1	Q9VWC6;X2BZL0;M9NES1	Ventral Tl10B (3)	0.772068	NaN
5456	CG7668-RA		Q9VW70	Q9VW70	Ventral Tl10B (3)	0.802278	NaN
5441	Trpml		Q9VW35	Q9VW35	Ventral Tl10B (3)	0.778241	NaN
5440	l(3)76BDm		Q9VW22	Q9VW22	Ventral Tl10B (3)	0.794308	NaN
5419	RpL26		Q9VVU2	Q9VVU2	Ventral Tl10B (3)	0.761941	NaN
5405	mRpS26	Probable 28S ribosomal protein S26, mitochondrial	Q9VVN2	Q9VVN2	Ventral Tl10B (3)	0.794473	NaN
5386			Q9VVG9	Q9VVG9	Ventral Tl10B (3)	0.728494	NaN
5373	CG9951	Coiled-coil domain-containing protein 22 homolog	Q9VVB4	Q9VVB4	Ventral Tl10B (3)	0.778479	NaN
5363	spd-2		Q9VV79	Q9VV79	Ventral Tl10B (3)	0.777656	NaN
5348	PDCD-5		Q9VUZ8	Q9VUZ8	Ventral Tl10B (3)	0.782353	NaN
5287	cmb		Q9VU76;M9PFE5;M9PFI2;Q961X4	Q9VU76;M9PFE5;M9PFI2;Q961X4	Ventral Tl10B (3)	0.792687	NaN
5281	Syx13		Q9VU45	Q9VU45	Ventral Tl10B (3)	0.773334	NaN
5261			Q9VTY5	Q9VTY5	Ventral Tl10B (3)	0.776077	NaN
5257			Q9VTW6	Q9VTW6	Ventral Tl10B (3)	0.770896	NaN
5205			Q9VT61	Q9VT61	Ventral Tl10B (3)	0.793904	NaN
5199			Q9VT38	Q9VT38	Ventral Tl10B (3)	0.7961	NaN
5190	CG3434	Queuine tRNA-ribosyltransferase subunit QTRTD1 homolog	Q9VSZ6	Q9VSZ6	Ventral Tl10B (3)	0.79871	NaN
5184	Bet3		Q9VSY8	Q9VSY8	Ventral Tl10B (3)	0.756069	NaN
5179	Klp67A	Kinesin-like protein	Q9VSW5;M9PF35	Q9VSW5;M9PF35	Ventral Tl10B (3)	0.782054	NaN
5175	Tequila		Q9VSU2;E1JI93	Q9VSU2;E1JI93	Ventral Tl10B (3)	0.666036	NaN
5127	PGRP-SD	Peptidoglycan-recognition protein SD	Q9VS97	Q9VS97	Ventral Tl10B (3)	0.78247	NaN
5118	eco	N-acetyltransferase eco	Q9VS50	Q9VS50	Ventral Tl10B (3)	0.768156	NaN
5117			Q9VS47	Q9VS47	Ventral Tl10B (3)	0.759791	NaN
5114	MED4	Mediator of RNA polymerase II transcription subunit 4	Q9VS38	Q9VS38	Ventral Tl10B (3)	0.802048	NaN
5053			Q9VRA0	Q9VRA0	Ventral Tl10B (3)	0.724129	NaN
5044	l(1)G0196	Inositol hexakisphosphate and diphosphoinositol-pentakisphosphate kinase	X2JEN2;Q9VR59;X2JCY0;X2JG41;X2JGE9;X2JLN4	X2JEN2;Q9VR59;X2JCY0;X2JG41;X2JGE9;X2JLN4	Ventral Tl10B (3)	0.80245	NaN
5043			Q9VR57;Q8IQ25	Q9VR57;Q8IQ25	Ventral Tl10B (3)	0.774423	NaN
5010			Q9VQT5	Q9VQT5	Ventral Tl10B (3)	0.745684	NaN
4983	colt	Congested-like trachea protein	Q9VQG4	Q9VQG4	Ventral Tl10B (3)	0.801208	NaN
4917	CG3645-RB		Q9VPM1	Q9VPM1	Ventral Tl10B (3)	0.776586	NaN
4915	Tbc1d15-17		Q9VPL5	Q9VPL5	Ventral Tl10B (3)	0.792251	NaN
4902			Q9VPF9	Q9VPF9	Ventral Tl10B (3)	0.775252	NaN
4874			Q9VP52;Q9VP51	Q9VP52;Q9VP51	Ventral Tl10B (3)	0.806655	NaN
4847			Q9VNR9;M9PDB7	Q9VNR9	Ventral Tl10B (3)	0.759758	NaN
4833	sec8	Exocyst complex component 4	Q9VNH6	Q9VNH6	Ventral Tl10B (3)	0.811454	NaN
4828	CG2182	Gametogenetin-binding protein 2-like	Q9VNG1	Q9VNG1	Ventral Tl10B (3)	0.776388	NaN
4822		3-oxoacyl-[acyl-carrier-protein] synthase	Q9VNF5	Q9VNF5	Ventral Tl10B (3)	0.791744	NaN
4797	Hus1-like		Q9VN60	Q9VN60	Ventral Tl10B (3)	0.771707	NaN
4795	eIF3-S5-1	Eukaryotic translation initiation factor 3 subunit F-1	Q9VN50	Q9VN50	Ventral Tl10B (3)	0.798487	NaN
4791	Fip1		Q9VN31	Q9VN31	Ventral Tl10B (3)	0.786066	NaN
4776			Q9VMX3	Q9VMX3	Ventral Tl10B (3)	0.785951	NaN
4766			Q9VMU2	Q9VMU2	Ventral Tl10B (3)	0.783819	NaN
4763	Ncoa6		Q9VMS2;M9NES4;A8DYV5	Q9VMS2;M9NES4;A8DYV5	Ventral Tl10B (3)	0.797578	NaN
4727			Q9VMC6	Q9VMC6	Ventral Tl10B (3)	0.772952	NaN
4703			Q9VM22	Q9VM22	Ventral Tl10B (3)	0.775535	NaN
4696			Q9VLX2	Q9VLX2	Ventral Tl10B (3)	0.811222	NaN
4695	Herp		Q9VLW9	Q9VLW9	Ventral Tl10B (3)	0.747804	NaN
4678	Piezo	Piezo-type mechanosensitive ion channel component	Q9VLS3;M9PB69;M9MRE5;M9PF50;Q0E8L0;E1JHB4;A0A0S0WGQ9;M9PCC7;Q8IPG4;M9PCW8;M9MSG8	Q9VLS3;M9PB69;M9MRE5;M9PF50;Q0E8L0;E1JHB4;A0A0S0WGQ9;M9PCC7;Q8IPG4;M9PCW8;M9MSG8	Ventral Tl10B (3)	0.761747	NaN
4632	Etl1	SWI/SNF-related matrix-associated actin-dependent regulator of chromatin subfamily A containing DEAD/H box 1 homolog	Q9VL72	Q9VL72	Ventral Tl10B (3)	0.795004	NaN
4580	Dpy-30L1	Protein dpy-30 homolog	Q9VKQ9	Q9VKQ9	Ventral Tl10B (3)	0.758971	NaN
4543	dmGlut		Q9VKC9	Q9VKC9	Ventral Tl10B (3)	0.766904	NaN
4537	rab3-GAP	Rab3 GTPase-activating protein regulatory subunit	Q9VKB9	Q9VKB9	Ventral Tl10B (3)	0.774621	NaN
4536	CG6712	Probable ribosome production factor 1	Q9VKB4	Q9VKB4	Ventral Tl10B (3)	0.785711	NaN
4526			Q9VK59	Q9VK59	Ventral Tl10B (3)	0.810976	NaN
4525	Pih1D1		Q9VK58	Q9VK58	Ventral Tl10B (3)	0.776042	NaN
4519	A16		Q9VK43	Q9VK43	Ventral Tl10B (3)	0.72331	NaN
4489	l(2)35Bd	mRNA cap guanine-N7 methyltransferase	Q9VJQ4	Q9VJQ4	Ventral Tl10B (3)	0.796847	NaN
4486	GMF		Q9VJL6	Q9VJL6	Ventral Tl10B (3)	0.753621	NaN
4482			Q9VJJ1	Q9VJJ1	Ventral Tl10B (3)	0.736916	NaN
4471	SPH93		Q9VJD7	Q9VJD7	Ventral Tl10B (3)	0.574532	NaN
4469	GCS2beta		Q9VJD1	Q9VJD1	Ventral Tl10B (3)	0.810457	NaN
4452	Grip71		Q9VJ57	Q9VJ57	Ventral Tl10B (3)	0.778254	NaN
4451	BEST:LD25345		Q9VJ45	Q9VJ45	Ventral Tl10B (3)	0.684672	NaN
4433			Q9VJ08	Q9VJ08	Ventral Tl10B (3)	0.791109	NaN
4405			Q9VIQ5	Q9VIQ5	Ventral Tl10B (3)	0.62761	NaN
4401	neb	Kinesin-like protein	Q9VIP4	Q9VIP4	Ventral Tl10B (3)	0.773541	NaN
4400			Q9VIP2	Q9VIP2	Ventral Tl10B (3)	0.76414	NaN
4393			Q9VIL2	Q9VIL2	Ventral Tl10B (3)	0.799244	NaN
4367	Mio		Q9VID4;Q8INT6	Q9VID4;Q8INT6	Ventral Tl10B (3)	0.782124	NaN
4366	Tsp39D	Tetraspanin	Q9VID1	Q9VID1	Ventral Tl10B (3)	0.776123	NaN
4350			Q9VI53	Q9VI53	Ventral Tl10B (3)	0.764031	NaN
4347			Q9VI15	Q9VI15	Ventral Tl10B (3)	0.792146	NaN
4339			Q9VHX2	Q9VHX2	Ventral Tl10B (3)	0.786747	NaN
4331			Q9VHV6;A0A0B4LGT9	Q9VHV6;A0A0B4LGT9	Ventral Tl10B (3)	0.79512	NaN
4300			Q9VHJ7	Q9VHJ7	Ventral Tl10B (3)	0.79999	NaN
4294			Q9VHI7	Q9VHI7	Ventral Tl10B (3)	0.803514	NaN
4243	mtTFB2	Dimethyladenosine transferase 2, mitochondrial	Q9VH38	Q9VH38	Ventral Tl10B (3)	0.79952	NaN
4228	CG6345	CDK5RAP1-like protein	Q9VGZ1	Q9VGZ1	Ventral Tl10B (3)	0.781272	NaN
4226	CG14683	Probable methyltransferase-like protein 15 homolog	Q9VGY5	Q9VGY5	Ventral Tl10B (3)	0.759352	NaN
4215	Ugt35a		Q9VGS9	Q9VGS9	Ventral Tl10B (3)	0.665845	NaN
4210	Arfip		Q9VGQ8	Q9VGQ8	Ventral Tl10B (3)	0.769958	NaN
4201			Q9VGN8	Q9VGN8	Ventral Tl10B (3)	0.76561	NaN
4199			Q9VGM4	Q9VGM4	Ventral Tl10B (3)	0.79363	NaN
4189	Cad87A	Cadherin-87A	Q9VGG5	Q9VGG5	Ventral Tl10B (3)	0.775373	NaN
4188	aurA		Q9VGF9	Q9VGF9	Ventral Tl10B (3)	0.770114	NaN
4165	Dip-C		Q9VG79	Q9VG79	Ventral Tl10B (3)	0.800328	NaN
4146			Q9VG01	Q9VG01	Ventral Tl10B (3)	0.764411	NaN
4109	CG3817	RRP15-like protein	Q9VFE6	Q9VFE6	Ventral Tl10B (3)	0.781287	NaN
4095	CG6236-RA		Q9VF91	Q9VF91	Ventral Tl10B (3)	0.798843	NaN
4068	ird5	Inhibitor of nuclear factor kappa-B kinase subunit beta	Q9VEZ5	Q9VEZ5	Ventral Tl10B (3)	0.771567	NaN
4063	Asun	Protein asunder	Q9VEX5	Q9VEX5	Ventral Tl10B (3)	0.781692	NaN
4017	MED17	Mediator of RNA polymerase II transcription subunit 17	Q9VEC1	Q9VEC1	Ventral Tl10B (3)	0.780559	NaN
4010			Q9VEA9	Q9VEA9	Ventral Tl10B (3)	0.571686	NaN
3998			Q9VE73	Q9VE73	Ventral Tl10B (3)	0.774516	NaN
3991	Gos28	Golgi SNAP receptor complex member 1	Q9VE50	Q9VE50	Ventral Tl10B (3)	0.781584	NaN
3989	snRNP-U1-C	U1 small nuclear ribonucleoprotein C	Q9VE17	Q9VE17	Ventral Tl10B (3)	0.785705	NaN
3978			Q9VDY6	Q9VDY6	Ventral Tl10B (3)	0.799241	NaN
3969			Q9VDT4	Q9VDT4	Ventral Tl10B (3)	0.759446	NaN
3967	Pk92B		Q9VDS9;Q7KSB7	Q9VDS9;Q7KSB7	Ventral Tl10B (3)	0.796855	NaN
3957	mdlc		Q9VDP8	Q9VDP8	Ventral Tl10B (3)	0.762964	NaN
3947			Q9VDI5;Q0KI39	Q9VDI5	Ventral Tl10B (3)	0.793917	NaN
3933	meigo	Solute carrier family 35 member B1 homolog	Q9VDD7	Q9VDD7	Ventral Tl10B (3)	0.770479	NaN
3924	Fancm		Q9VDA0	Q9VDA0	Ventral Tl10B (3)	0.751088	NaN
3899	mRpL45	Probable 39S ribosomal protein L45, mitochondrial	Q9VCX3	Q9VCX3	Ventral Tl10B (3)	0.801675	NaN
3885	Usp12-46		Q9VCT9	Q9VCT9	Ventral Tl10B (3)	0.810989	NaN
3861			Q9VCG0	Q9VCG0	Ventral Tl10B (3)	0.740534	NaN
3850			Q9VCD3	Q9VCD3	Ventral Tl10B (3)	0.77059	NaN
3837	BRWD3		Q9VC96	Q9VC96	Ventral Tl10B (3)	0.773744	NaN
3834			Q9VC87	Q9VC87	Ventral Tl10B (3)	0.780245	NaN
3812	Trf4-2		Q9VC07	Q9VC07	Ventral Tl10B (3)	0.762369	NaN
3799			Q9VBX8	Q9VBX8	Ventral Tl10B (3)	0.790545	NaN
3795	Mocs2	Molybdopterin synthase catalytic subunit	Q9VBX2	Q9VBX2	Ventral Tl10B (3)	0.783502	NaN
3763	Sld5	DNA replication complex GINS protein SLD5	Q9VBI1	Q9VBI1	Ventral Tl10B (3)	0.778701	NaN
3756	plum		Q9VBE5	Q9VBE5	Ventral Tl10B (3)	0.789799	NaN
3735	pins		Q9VB22	Q9VB22	Ventral Tl10B (3)	0.789953	NaN
3732	RpS10a	40S ribosomal protein S10a	Q9VB14	Q9VB14	Ventral Tl10B (3)	0.756821	NaN
3725	CG5003-RA		Q9VAZ0	Q9VAZ0	Ventral Tl10B (3)	0.789987	NaN
3717	CG4884-RA		Q9VAX9	Q9VAX9	Ventral Tl10B (3)	0.751848	NaN
3699			Q9VAP1	Q9VAP1	Ventral Tl10B (3)	0.763088	NaN
3688	ND-20L		Q9VAK5	Q9VAK5	Ventral Tl10B (3)	0.667976	NaN
3672			Q9VAF3	Q9VAF3	Ventral Tl10B (3)	0.741876	NaN
3667	Sas-6	Spindle assembly abnormal protein 6 homolog	Q9VAC8	Q9VAC8	Ventral Tl10B (3)	0.740065	NaN
3659			Q9VA97	Q9VA97	Ventral Tl10B (3)	0.789555	NaN
3656			Q9VA80	Q9VA80	Ventral Tl10B (3)	0.714514	NaN
3652	Npc2g		Q9VA42	Q9VA42	Ventral Tl10B (3)	0.774742	NaN
3647	zwilch	Protein zwilch	Q9VA00	Q9VA00	Ventral Tl10B (3)	0.787004	NaN
3616	phtf	Putative homeodomain transcription factor	Q9V9A8	Q9V9A8	Ventral Tl10B (3)	0.797645	NaN
3599	mRpS16	Probable 28S ribosomal protein S16, mitochondrial	Q9V6Y3	Q9V6Y3	Ventral Tl10B (3)	0.760229	NaN
3583	CG1968	Conserved oligomeric Golgi complex subunit 6	Q9V564	Q9V564	Ventral Tl10B (3)	0.793237	NaN
3572	myo		Q9V4F4	Q9V4F4	Ventral Tl10B (3)	0.736818	NaN
3529	Ilk		Q9V400;E3CTS5	Q9V400	Ventral Tl10B (3)	0.768041	NaN
3513	Spc25	Kinetochore protein Spc25	Q9V3V7	Q9V3V7	Ventral Tl10B (3)	0.745917	NaN
3502	BcDNA.GH12326		Q9V3S7	Q9V3S7	Ventral Tl10B (3)	0.77012	NaN
3496	l(2)34Fd		Q9V3P2	Q9V3P2	Ventral Tl10B (3)	0.778847	NaN
3458	c12.1	Protein CWC15 homolog	Q9V3B6;REV__Q9VNZ4	Q9V3B6	Ventral Tl10B (3)	0.814471	NaN
3424	PEK	Eukaryotic translation initiation factor 2-alpha kinase	Q9NIV1;A0A0B4KGJ5;A0A0B4KG56	Q9NIV1;A0A0B4KGJ5;A0A0B4KG56	Ventral Tl10B (3)	0.773056	NaN
3409	hdc	Headcase protein;Headcase short protein	Q9N2M8;A0A0B4KI61;Q8IMI6	Q9N2M8;A0A0B4KI61	Ventral Tl10B (3)	0.753097	NaN
3379	spin	Protein spinster	Q9GQQ0	Q9GQQ0	Ventral Tl10B (3)	0.762426	NaN
3377	Ranbp16	Ran-binding protein 16	X2JFC3;Q9GQN0;M9MSN9;M9MS57;M9MSD3;M9MSB0	X2JFC3;Q9GQN0;M9MSN9;M9MS57;M9MSD3;M9MSB0	Ventral Tl10B (3)	0.789282	NaN
3365	lgs	Protein BCL9 homolog	Q961D9	Q961D9	Ventral Tl10B (3)	0.80392	NaN
3352	milt	Trafficking kinesin-binding protein milt	Q960V3	Q960V3	Ventral Tl10B (3)	0.788246	NaN
3346			Q960J7	Q960J7	Ventral Tl10B (3)	0.792342	NaN
3267	BEAF-32		Q94513	Q94513	Ventral Tl10B (3)	0.786395	NaN
3252			Q8T4C9	Q8T4C9	Ventral Tl10B (3)	0.637779	NaN
3224			Q8T051	Q8T051	Ventral Tl10B (3)	0.767373	NaN
3207	Sdhaf3	Succinate dehydrogenase assembly factor 3, mitochondrial	Q8SZ16	Q8SZ16	Ventral Tl10B (3)	0.798212	NaN
3206			Q8SZ15	Q8SZ15	Ventral Tl10B (3)	0.809312	NaN
3184	gw	Protein Gawky	Q8SY33	Q8SY33	Ventral Tl10B (3)	0.799467	NaN
3158	kuk		Q8SX89	Q8SX89	Ventral Tl10B (3)	0.78652	NaN
3149	Pis		Q8SX37	Q8SX37	Ventral Tl10B (3)	0.703334	NaN
3142	EG:171D11.2		Q8SWW9	Q8SWW9	Ventral Tl10B (3)	0.751312	NaN
3125	CG8112-RA	O-acyltransferase	Q8MYW9;D3DMP4;A0A0B4LGV0	Q8MYW9;D3DMP4;A0A0B4LGV0	Ventral Tl10B (3)	0.755105	NaN
3121	GalNAc-T2	Polypeptide N-acetylgalactosaminyltransferase;N-acetylgalactosaminyltransferase 7	X2JEA3;Q8MV48	X2JEA3;Q8MV48	Ventral Tl10B (3)	0.764988	NaN
3114	Ns1	Guanine nucleotide-binding protein-like 3 homolog	Q8MT06	Q8MT06	Ventral Tl10B (3)	0.770279	NaN
3106	mRpS2		Q8MSS7	Q8MSS7	Ventral Tl10B (3)	0.803707	NaN
3104	Mekk1		Q8MSQ4;Q9VE37	Q8MSQ4;Q9VE37	Ventral Tl10B (3)	0.792345	NaN
3090			Q8MRI4	Q8MRI4	Ventral Tl10B (3)	0.781494	NaN
3087	CG1827	' Putative N(4)-(beta-N-acetylglucosaminyl)-L-asparaginase CG1827;Glycosylasparaginase alpha chain;Glycosylasparaginase beta chai...' <Preview truncated at 128 characters>	Q8MR45	Q8MR45	Ventral Tl10B (3)	0.801225	NaN
3070	LBR	Lamin-B receptor	Q8MLV1	Q8MLV1	Ventral Tl10B (3)	0.784661	NaN
3060	Coq9	Ubiquinone biosynthesis protein COQ9, mitochondrial	Q8MKN0	Q8MKN0	Ventral Tl10B (3)	0.790399	NaN
3028	CG32638-RB		Q8IR72	Q8IR72	Ventral Tl10B (3)	0.775335	NaN
3027			Q8IR64	Q8IR64	Ventral Tl10B (3)	0.665093	NaN
2995			Q8IQ70	Q8IQ70	Ventral Tl10B (3)	0.744221	NaN
2986			Q8IPU7;Q8IPU8;Q9VPD6	Q8IPU7;Q8IPU8;Q9VPD6	Ventral Tl10B (3)	0.77259	NaN
2966	Ada1-2;Ada1-1		Q8IPA1;Q8IP99	Q8IPA1;Q8IP99	Ventral Tl10B (3)	0.742731	NaN
2957			Q8IP11	Q8IP11	Ventral Tl10B (3)	0.458065	NaN
2954	CG10336	Protein TIPIN homolog	Q8INX3	Q8INX3	Ventral Tl10B (3)	0.775603	NaN
2952	CG31674-RA		Q8INU6	Q8INU6	Ventral Tl10B (3)	0.545971	NaN
2950			Q8INL3	Q8INL3	Ventral Tl10B (3)	0.750172	NaN
2946	timeout		Q8INH7	Q8INH7	Ventral Tl10B (3)	0.776021	NaN
2879	Hmr		Q86CW5	Q86CW5	Ventral Tl10B (3)	0.792112	NaN
2875			Q9XZ25;Q86BR7	Q9XZ25;Q86BR7	Ventral Tl10B (3)	0.773962	NaN
2873	pfk		Q86BP7;Q9VZU3	Q86BP7;Q9VZU3	Ventral Tl10B (3)	0.694663	NaN
2853	rno	PHD finger protein rhinoceros	Q7YZH1	Q7YZH1	Ventral Tl10B (3)	0.703143	NaN
2821	spoon		Q9W4C4;Q7KVW1	Q9W4C4;Q7KVW1	Ventral Tl10B (3)	0.796598	NaN
2809	CG33230-RA		Q7KVB0	Q7KVB0	Ventral Tl10B (3)	0.666713	NaN
2804	PAN3;CG11486-RK;CG11486;CG11486-RB	PAB-dependent poly(A)-specific ribonuclease subunit PAN3	Q9VZV3;Q7KV83;Q95RR8;Q9I7T8;A8JNJ2;Q8IRE7	Q9VZV3;Q7KV83;Q95RR8;Q9I7T8;A8JNJ2;Q8IRE7	Ventral Tl10B (3)	0.815568	NaN
2754			Q7KSV7;Q95T08	Q7KSV7;Q95T08	Ventral Tl10B (3)	0.81425	NaN
2735			Q7KRS9;Q8IMG3	Q7KRS9;Q8IMG3	Ventral Tl10B (3)	0.78365	NaN
2730	CG11148	PERQ amino acid-rich with GYF domain-containing protein CG11148	Q7KQM6;REV__A0A0B4KG49	Q7KQM6	Ventral Tl10B (3)	0.775465	NaN
2650	tef	Protein teflon	Q7K4M4	Q7K4M4	Ventral Tl10B (3)	0.784701	NaN
2648			Q7K4L8	Q7K4L8	Ventral Tl10B (3)	0.790402	NaN
2646	CG8892-RB	UBX domain-containing protein 7	Q7K4I5	Q7K4I5	Ventral Tl10B (3)	0.78596	NaN
2613	loopin-1		Q7K2S9	Q7K2S9	Ventral Tl10B (3)	0.772855	NaN
2608	lat		Q7K2L1	Q7K2L1	Ventral Tl10B (3)	0.766533	NaN
2590	Jheh3		Q7K1W4	Q7K1W4	Ventral Tl10B (3)	0.728816	NaN
2579	CG6491		Q7K1H0	Q7K1H0	Ventral Tl10B (3)	0.780729	NaN
2566	Not3		Q7K126	Q7K126	Ventral Tl10B (3)	0.789503	NaN
2551	Tpc1		Q7K0L7	Q7K0L7	Ventral Tl10B (3)	0.770963	NaN
2546	Mob4	MOB kinase activator-like 4	Q7K0E3;A0A0B4K6X9	Q7K0E3;A0A0B4K6X9	Ventral Tl10B (3)	0.785737	NaN
2542	mRpL42		Q7K0A0	Q7K0A0	Ventral Tl10B (3)	0.751424	NaN
2538	Tsp42Ef	Tetraspanin	Q7K010	Q7K010	Ventral Tl10B (3)	0.769076	NaN
2499			Q7JX95	Q7JX95	Ventral Tl10B (3)	0.748474	NaN
2477	wash	WAS protein family homolog 1	Q7JW27	Q7JW27	Ventral Tl10B (3)	0.76062	NaN
2454	trmt10c	Mitochondrial ribonuclease P protein 1 homolog	Q7JUX9	Q7JUX9	Ventral Tl10B (3)	0.781527	NaN
2446			Q7JRM5	Q7JRM5	Ventral Tl10B (3)	0.764975	NaN
2433	CG30094-RA		Q7JR99	Q7JR99	Ventral Tl10B (3)	0.760561	NaN
2416	CaMKI		Q7JMV3;A4V110;Q0KIF7	Q7JMV3;A4V110;Q0KIF7	Ventral Tl10B (3)	0.767143	NaN
2370	Synj		Q5U0V7	Q5U0V7	Ventral Tl10B (3)	0.797145	NaN
2352	CG9795-RD		Q59E01;Q8IPM6;Q86BB1;Q95RI8	Q59E01;Q8IPM6;Q86BB1;Q95RI8	Ventral Tl10B (3)	0.783351	NaN
2348	dnk	Deoxynucleoside kinase	Q540Z9;Q9XZT6	Q540Z9;Q9XZT6	Ventral Tl10B (3)	0.757532	NaN
2337			Q4V619	Q4V619	Ventral Tl10B (3)	0.766653	NaN
2333			Q4V5H0;Q9VCD4	Q4V5H0;Q9VCD4	Ventral Tl10B (3)	0.716641	NaN
2329			Q4V3Z5	Q4V3Z5	Ventral Tl10B (3)	0.781924	NaN
2309			Q2PDX2;M9PF23	Q2PDX2;M9PF23	Ventral Tl10B (3)	0.781685	NaN
2308	Cp110		Q2PDW6;Q9VR58;M9PI43	Q2PDW6;Q9VR58;M9PI43	Ventral Tl10B (3)	0.712632	NaN
2307	NimB3		Q2PDU0	Q2PDU0	Ventral Tl10B (3)	0.708333	NaN
2299	Rrp42		Q29QQ9	Q29QQ9	Ventral Tl10B (3)	0.793676	NaN
2295	Pcmt	Protein-L-isoaspartate(D-aspartate) O-methyltransferase;Protein-L-isoaspartate O-methyltransferase	Q27869;A0A0B4KGK0	Q27869;A0A0B4KGK0	Ventral Tl10B (3)	0.770474	NaN
2291	l(2)not	Lethal(2)neighbour of tid protein	Q27333	Q27333	Ventral Tl10B (3)	0.733313	NaN
2203	CG32699	1-acylglycerophosphocholine O-acyltransferase 1	Q0KHU5	Q0KHU5	Ventral Tl10B (3)	0.730657	NaN
2177	eIF2B-delta		Q0E8X6;Q9W1Q8	Q0E8X6;Q9W1Q8	Ventral Tl10B (3)	0.796721	NaN
2175	CG30427		Q9W0Y5;Q0E8W1;Q8MMC6	Q9W0Y5;Q0E8W1;Q8MMC6	Ventral Tl10B (3)	0.551743	NaN
2169			Q0E8P1;Q9VIX6	Q0E8P1;Q9VIX6	Ventral Tl10B (3)	0.743181	NaN
2155	mub		Q0E8A7;M9NEH9	Q0E8A7;M9NEH9	Ventral Tl10B (3)	0.749958	NaN
2147	TfIIFalpha	General transcription factor IIF subunit 1	Q05913	Q05913	Ventral Tl10B (3)	0.802806	NaN
2135	H	Protein hairless	Q02308	Q02308	Ventral Tl10B (3)	0.770318	NaN
2103	Rtc1	Probable RNA 3-terminal phosphate cyclase-like protein	P56175	P56175	Ventral Tl10B (3)	0.786364	NaN
2060	mnb	Serine/threonine-protein kinase minibrain	P49657;X2JFM3;Q9VX06	P49657;X2JFM3;Q9VX06	Ventral Tl10B (3)	0.795788	NaN
2058	mago	Protein mago nashi	P49028	P49028	Ventral Tl10B (3)	0.816249	NaN
2033	plu	DNA replication inhibitor plutonium	P42570	P42570	Ventral Tl10B (3)	0.761081	NaN
2030	lola;pre-lola-G	Longitudinals lacking protein, isoform G	P42283;A0A0B4KEI4;P42284;Q7KQZ4	P42283;A0A0B4KEI4	Ventral Tl10B (3)	0.765635	NaN
2029	37135	Septin-1	P42207	P42207	Ventral Tl10B (3)	0.784049	NaN
2010	salm	Homeotic protein spalt-major	X2JA59;P39770	X2JA59;P39770	Ventral Tl10B (3)	0.693942	NaN
1955	mts	Serine/threonine-protein phosphatase;Serine/threonine-protein phosphatase PP2A	X2JDI1;P23696	X2JDI1;P23696	Ventral Tl10B (3)	0.770161	NaN
1926	Su(var)3-7	Protein suppressor of variegation 3-7	P20193;E1JIJ9	P20193;E1JIJ9	Ventral Tl10B (3)	0.796596	NaN
1915	ptc	Protein patched	P18502	P18502	Ventral Tl10B (3)	0.788521	NaN
1911	RpL40	Ubiquitin-60S ribosomal protein L40;Ubiquitin;60S ribosomal protein L40	Q7JYK1;P18101	Q7JYK1;P18101	Ventral Tl10B (3)	0.6673	NaN
1907	crn	Protein crooked neck	P17886	P17886	Ventral Tl10B (3)	0.766069	NaN
1882	Lsp1beta	Larval serum protein 1 beta chain	X2J8F5;P11996	X2J8F5;P11996	Ventral Tl10B (3)	0.734633	NaN
1858	Cp36	Chorion protein S36	P07182	P07182	Ventral Tl10B (3)	0.749007	NaN
1854	eve	Segmentation protein even-skipped	P06602	P06602	Ventral Tl10B (3)	0.747259	NaN
1832	His1:CG33861;His1;His1:CG33834;His1:CG33807	Histone H1	Q4AB54;P02255;Q4AB94;Q4ABD8	Q4AB54;P02255;Q4AB94;Q4ABD8	Ventral Tl10B (3)	0.798379	NaN
1825	l(1)10Bb		O97454	O97454	Ventral Tl10B (3)	0.785674	NaN
1790	CG4045	tRNA (guanine-N(7)-)-methyltransferase	O77263	O77263	Ventral Tl10B (3)	0.782734	NaN
1784	Pp4-19C	Serine/threonine-protein phosphatase;Serine/threonine-protein phosphatase 4 catalytic subunit	X2JG90;O76932	X2JG90;O76932	Ventral Tl10B (3)	0.776418	NaN
1771	EG:100G10.1		O76861	O76861	Ventral Tl10B (3)	0.779113	NaN
1740	png		O46308	O46308	Ventral Tl10B (3)	0.767883	NaN
1697	RpL39	60S ribosomal protein L39	O16130	O16130	Ventral Tl10B (3)	0.627949	NaN
1648	e(y)3	Supporter of activation of yellow protein	M9PHL0;M9PHZ0;M9PI16;Q9VWF2	M9PHL0;M9PHZ0;M9PI16;Q9VWF2	Ventral Tl10B (3)	0.786611	NaN
1647	Tao		M9PHK2;Q0KHQ5;Q8IQW6;M9NE33;M9PI11	M9PHK2;Q0KHQ5;Q8IQW6	Ventral Tl10B (3)	0.741784	NaN
1642	Trf2		Q8T052;M9PHD8;Q07DP5	Q8T052;M9PHD8;Q07DP5	Ventral Tl10B (3)	0.736928	NaN
1626	Bx42	Puff-specific protein Bx42	M9PGQ6;P39736	M9PGQ6;P39736	Ventral Tl10B (3)	0.801236	NaN
1594	Cdk12	Cyclin-dependent kinase 12	M9PG50;Q9VP22	M9PG50;Q9VP22	Ventral Tl10B (3)	0.791008	NaN
1584	TfIIS	Transcription elongation factor S-II	M9PFV9;P20232;Q9VXS6	M9PFV9;P20232	Ventral Tl10B (3)	0.801179	NaN
1559	Hip14	Palmitoyltransferase	Q9VUW9;M9PFE4	Q9VUW9;M9PFE4	Ventral Tl10B (3)	0.770459	NaN
1557	alien	COP9 signalosome complex subunit 2	M9PFB5;Q94899	M9PFB5;Q94899	Ventral Tl10B (3)	0.811706	NaN
1547	tral		M9PF14;M9PF20	M9PF14;M9PF20	Ventral Tl10B (3)	0.77281	NaN
1541	byn	T-related protein	M9PEX3;P55965	M9PEX3;P55965	Ventral Tl10B (3)	0.748215	NaN
1535	simj		Q960V1;Q0E8G1;M9PET3;M9PF79	Q960V1;Q0E8G1;M9PET3;M9PF79	Ventral Tl10B (3)	0.794247	NaN
1523	ZnT63C		Q7K3K5;M9PEG6	Q7K3K5;M9PEG6	Ventral Tl10B (3)	0.670368	NaN
1503			M9PDP5;Q9W4R7;M9PGK9	M9PDP5;Q9W4R7;M9PGK9	Ventral Tl10B (3)	0.7342	NaN
1465	rost	Protein rolling stone	M9PD01;O44252	M9PD01;O44252	Ventral Tl10B (3)	0.753248	NaN
1451	mRpS7	28S ribosomal protein S7, mitochondrial	M9PCL5;Q9VKX4	M9PCL5;Q9VKX4	Ventral Tl10B (3)	0.78351	NaN
1425	x16		M9PC85;Q9V3V0	M9PC85;Q9V3V0	Ventral Tl10B (3)	0.809217	NaN
1416	Mad	Mothers against decapentaplegic homolog;Protein mothers against dpp	M9PBX0;P42003	M9PBX0;P42003	Ventral Tl10B (3)	0.75253	NaN
1415	UbcE2M;Ubc12	Nedd8-conjugating enzyme Ubc12	M9PBW0;Q9VSF3	M9PBW0;Q9VSF3	Ventral Tl10B (3)	0.787405	NaN
1365	CG17078-RA		M9PAY6;M9PDS0;Q9VPM7	M9PAY6;M9PDS0;Q9VPM7	Ventral Tl10B (3)	0.803481	NaN
1309	CG7427	Defective in cullin neddylation protein;DCN1-like protein	M9PI67;M9NEA3;M9NDR9;Q9VUQ8	M9PI67;M9NEA3;M9NDR9;Q9VUQ8	Ventral Tl10B (3)	0.767295	NaN
1298	Lasp	LIM and SH3 domain protein Lasp	M9NDA6;Q8I7C3;M9NFH3	M9NDA6;Q8I7C3;M9NFH3	Ventral Tl10B (3)	0.796321	NaN
1248			M9MRL4	M9MRL4	Ventral Tl10B (3)	0.743774	NaN
1206	Torsin	Torsin-like protein	F6JQA6;O77277	F6JQA6;O77277	Ventral Tl10B (3)	0.806063	NaN
1169	Tango11	Transport and Golgi organization protein 11	E2QCK0;Q961C9;A0A0B4LG59	E2QCK0;Q961C9	Ventral Tl10B (3)	0.787237	NaN
1160	Grip84	Gamma-tubulin complex component 2 homolog	E1JJQ3;Q8IQW7;X2JG40;E1JJQ4;Q9XYP7	E1JJQ3;Q8IQW7;X2JG40;E1JJQ4;Q9XYP7	Ventral Tl10B (3)	0.790044	NaN
1143	sol	Calpain-D	E1JJ98;P27398	E1JJ98;P27398	Ventral Tl10B (3)	0.757119	NaN
1126	osa	Trithorax group protein osa	Q7KSE8;E1JIN6;Q8IN94;A0A0B4KHB1;A0A0B4KGD1	Q7KSE8;E1JIN6;Q8IN94;A0A0B4KHB1;A0A0B4KGD1	Ventral Tl10B (3)	0.810747	NaN
1110	Sin		E1JI58;Q9VP85	E1JI58;Q9VP85	Ventral Tl10B (3)	0.800992	NaN
1085	CG7544	Methyltransferase-like protein;Methyltransferase-like protein 16 homolog	E1JH71;Q7K3B9	E1JH71;Q7K3B9	Ventral Tl10B (3)	0.784906	NaN
952	Atg16		Q86BR6;B7Z0R7;Q95TJ1	Q86BR6;B7Z0R7;Q95TJ1	Ventral Tl10B (3)	0.775061	NaN
950			B7Z0N0	B7Z0N0	Ventral Tl10B (3)	0.790528	NaN
944	Su(var)3-3	Possible lysine-specific histone demethylase 1	B7Z0G7;Q9VW97;M9PFR5	B7Z0G7;Q9VW97;M9PFR5	Ventral Tl10B (3)	0.781151	NaN
902	Jabba		B7YZK4;B7YZK5;A0A0B4KG78;A0A0B4JCT7;B7YZK6	B7YZK4;B7YZK5;A0A0B4KG78;A0A0B4JCT7;B7YZK6	Ventral Tl10B (3)	0.767686	NaN
891	hfw	Protein halfway	B6IDK2;Q9W568	B6IDK2;Q9W568	Ventral Tl10B (3)	0.777783	NaN
879	how	Protein held out wings	E1JIT0;B3DNL7;O01367;A0A0B4KHV5	E1JIT0;B3DNL7;O01367;A0A0B4KHV5	Ventral Tl10B (3)	0.774709	NaN
878	Tis11	Protein TIS11	B3DN56;P47980	B3DN56;P47980	Ventral Tl10B (3)	0.753288	NaN
870	Nup153	Nuclear pore complex protein Nup153	A8JV18;Q9VXE6	A8JV18;Q9VXE6	Ventral Tl10B (3)	0.799832	NaN
860			A8JUS8;Q9W5G0	A8JUS8;Q9W5G0	Ventral Tl10B (3)	0.811676	NaN
840	A2bp1		M9PF74;A8JNQ5;A8JNQ4;M9ND74;Q7YU08;Q9VT99;Q9VT98;M9NFQ7	M9PF74;A8JNQ5;A8JNQ4;M9ND74;Q7YU08;Q9VT99;Q9VT98;M9NFQ7	Ventral Tl10B (3)	0.762254	NaN
819	CG34183	Putative RNA polymerase II subunit B1 CTD phosphatase RPAP2 homolog	A8DYY5	A8DYY5	Ventral Tl10B (3)	0.779674	NaN
774	Doa	Serine/threonine-protein kinase Doa	B7Z0R6;A4V3J9;Q0KI03;Q8IML9;A0A0B4K7Z3;A8JRF7;Q86B72;A0A0C4DHG9;P49762	B7Z0R6;A4V3J9;Q0KI03;Q8IML9;A0A0B4K7Z3;A8JRF7;Q86B72;A0A0C4DHG9;P49762	Ventral Tl10B (3)	0.778315	NaN
752	Pdk1	3-phosphoinositide-dependent protein kinase 1	A4V164;H5V8B9;Q9W0V1;A4V166	A4V164;H5V8B9;Q9W0V1;A4V166	Ventral Tl10B (3)	0.78713	NaN
726	CG18065-RA		A1ZBV5	A1ZBV5	Ventral Tl10B (3)	0.793413	NaN
697			A1ZB29	A1ZB29	Ventral Tl10B (3)	0.795676	NaN
646	tum		A1Z9I5	A1Z9I5	Ventral Tl10B (3)	0.801293	NaN
636	AGBE		A1Z992	A1Z992	Ventral Tl10B (3)	0.773333	NaN
625	Sr-CII		A1Z8V0;Q9V3H7	A1Z8V0	Ventral Tl10B (3)	0.72262	NaN
613	CG18004-RB		A1Z8D4	A1Z8D4	Ventral Tl10B (3)	0.791593	NaN
602	cdc2rk		A1Z840	A1Z840	Ventral Tl10B (3)	0.759774	NaN
595	CG30001-RA		A1Z7Z8	A1Z7Z8	Ventral Tl10B (3)	0.709712	NaN
585	Hydr1		E2QCN3;A1Z7Q7	E2QCN3;A1Z7Q7	Ventral Tl10B (3)	0.783995	NaN
577	CG30349-RA		A1Z7K2	A1Z7K2	Ventral Tl10B (3)	0.786759	NaN
574	CG8586-RA		A1Z7H7	A1Z7H7	Ventral Tl10B (3)	0.733326	NaN
562	CG1383		A1Z743;A1Z745;Q8SXN9	A1Z743;A1Z745;Q8SXN9	Ventral Tl10B (3)	0.78916	NaN
549	Bap170		A1Z6M0	A1Z6M0	Ventral Tl10B (3)	0.794372	NaN
542			A1Z6H6	A1Z6H6	Ventral Tl10B (3)	0.796341	NaN
524	l(3)07882	Nucleolar protein 14 homolog	A0A126GUW2;Q9VEJ2	A0A126GUW2;Q9VEJ2	Ventral Tl10B (3)	0.765543	NaN
515	hd	Protein downstream neighbor of son homolog	A0A126GUQ3;Q9VNA8	A0A126GUQ3;Q9VNA8	Ventral Tl10B (3)	0.765914	NaN
480	att-ORFA		A0A0B4LIE8;Q9VDL7;Q8IN53	A0A0B4LIE8;Q9VDL7;Q8IN53	Ventral Tl10B (3)	0.749936	NaN
470	Rga	Regulator of gene activity	A0A0B4LHS9;Q94547	A0A0B4LHS9;Q94547	Ventral Tl10B (3)	0.766253	NaN
455	CG7694	E3 ubiquitin-protein ligase RNF181 homolog	A0A0B4LHA6;Q9VE61	A0A0B4LHA6;Q9VE61	Ventral Tl10B (3)	0.763465	NaN
395	thr		A0A0B4LFY0	A0A0B4LFY0	Ventral Tl10B (3)	0.758355	NaN
390	ana2		A0A0B4LFU9	A0A0B4LFU9	Ventral Tl10B (3)	0.743904	NaN
367	cg		A8DYD3;A1Z9M3;B7YZE6;A0A0B4LFC7;A8DYD2;A8DYD1;A0A0B4LF29;A0A126GUP1	A8DYD3;A1Z9M3;B7YZE6;A0A0B4LFC7;A8DYD2;A8DYD1;A0A0B4LF29;A0A126GUP1	Ventral Tl10B (3)	0.79545	NaN
356	Mppe		Q8T085;A1Z8S4;A0A0B4LG64;A0A0B4LF50	Q8T085;A1Z8S4;A0A0B4LG64;A0A0B4LF50	Ventral Tl10B (3)	0.791256	NaN
344	Cyp6u1	Probable cytochrome P450 6u1	A0A0B4LET2;Q9V979	A0A0B4LET2;Q9V979	Ventral Tl10B (3)	0.778143	NaN
317	dco	Discs overgrown protein kinase	A0A0B4KHX3;O76324	A0A0B4KHX3;O76324	Ventral Tl10B (3)	0.797556	NaN
308	Pp1alpha-96A	Serine/threonine-protein phosphatase;Serine/threonine-protein phosphatase alpha-1 isoform	A0A0B4KHS9;P48461;A8QI94	A0A0B4KHS9;P48461	Ventral Tl10B (3)	0.762645	NaN
293	dgt1		A0A0B4KHH6;Q9VAF4;A0A0B4LHU7	A0A0B4KHH6;Q9VAF4;A0A0B4LHU7	Ventral Tl10B (3)	0.788362	NaN
283	CtBP		A0A0B4KHB2	A0A0B4KHB2	Ventral Tl10B (3)	0.769222	NaN
266	Tsp96F	Tetraspanin	Q9V3X2;A0A0B4KH03	Q9V3X2;A0A0B4KH03	Ventral Tl10B (3)	0.739173	NaN
256	lute;CG5319-RA		Q9VEL0;A0A0B4KGU2;C7LAF3	Q9VEL0;A0A0B4KGU2;C7LAF3	Ventral Tl10B (3)	0.805121	NaN
248	Mvl	Protein Malvolio	A4V370;A0A0B4KGL5;P49283;A0A0B4K7L4	A4V370;A0A0B4KGL5;P49283;A0A0B4K7L4	Ventral Tl10B (3)	0.789886	NaN
238	cic	Putative transcription factor capicua	A0A0B4KGD7;A0A0B4K6D6;A0A0B4K778;A0A0B4K698;Q9U1H0	A0A0B4KGD7;A0A0B4K6D6;A0A0B4K778;A0A0B4K698;Q9U1H0	Ventral Tl10B (3)	0.782596	NaN
237	apt		O61602;Q9W1M6;A0A0B4KGD0;Q8MLR4	O61602;Q9W1M6;A0A0B4KGD0;Q8MLR4	Ventral Tl10B (3)	0.79578	NaN
232	Jupiter		A0A0B4KG85	A0A0B4KG85	Ventral Tl10B (3)	0.755313	NaN
147	ttv	Exostosin-1	A0A0B4KER9;Q9V730;D5SHU8	A0A0B4KER9;Q9V730	Ventral Tl10B (3)	0.759425	NaN
142	PI31	Proteasome inhibitor PI31 subunit	A0A0B4KEK7;Q9V637	A0A0B4KEK7;Q9V637	Ventral Tl10B (3)	0.781178	NaN
121	tun	Protein N-terminal glutamine amidohydrolase	A0A0B4K882;Q7K2Y9	A0A0B4K882;Q7K2Y9	Ventral Tl10B (3)	0.808545	NaN
113	larp	La-related protein 1	A0A0B4K7Y7;Q9VAW5;A0A0B4K6K9	A0A0B4K7Y7;Q9VAW5;A0A0B4K6K9	Ventral Tl10B (3)	0.812105	NaN
105	Mlf	Myeloid leukemia factor	A0A0B4K7R5;E1JH79;Q9NKV0	A0A0B4K7R5;E1JH79;Q9NKV0	Ventral Tl10B (3)	0.7638	NaN
102	p53		A0A0B4K7P1;Q9N6D8;Q8IMZ4	A0A0B4K7P1;Q9N6D8;Q8IMZ4	Ventral Tl10B (3)	0.755537	NaN
75	gus	Protein gustavus	A0A0B4K6X3;A1Z6E0	A0A0B4K6X3;A1Z6E0	Ventral Tl10B (3)	0.79393	NaN
73	su(Hw)	Protein suppressor of hairy wing	A0A0B4K6W1;P08970	A0A0B4K6W1;P08970	Ventral Tl10B (3)	0.779266	NaN
58	mld		A0A0B4K6J3;Q8IMW5;A0A0C4DHB7;A0A0B4K7S6	A0A0B4K6J3;Q8IMW5;A0A0C4DHB7;A0A0B4K7S6	Ventral Tl10B (3)	0.597751	NaN
42	pr-set7	Histone-lysine N-methyltransferase pr-set7	A0A0B4K680;Q9VFK6	A0A0B4K680;Q9VFK6	Ventral Tl10B (3)	0.740279	NaN
38	btsz		A0A0B4K657;Q6XK20;B7Z0K1	A0A0B4K657	Ventral Tl10B (3)	0.736598	NaN
8	CG9849	PRADC1-like protein	A0A0B4JCU5;Q9W1W9	A0A0B4JCU5;Q9W1W9	Ventral Tl10B (3)	0.724604	NaN
5011			Q9VQT6	Q9VQT6	Ventral Tl10B (3)	0.447248	NaN
5380	Papst2	Adenosine 3-phospho 5-phosphosulfate transporter 2	Q9VVD9	Q9VVD9	Ventral Tl10B (3)	0.743126	NaN
6			A0A0B4JD24;A0A0B4JCR9;Q7JQT8	A0A0B4JD24;A0A0B4JCR9;Q7JQT8	Ventral Tl10B (3)	0.795861	NaN
241	beta-Man		A0A0B4KGF7;Q9VMY5;Q0KIE6	A0A0B4KGF7;Q9VMY5;Q0KIE6	Ventral spn27A (4)	NaN	0.708472
397			A0A0B4LFY9	A0A0B4LFY9	Ventral spn27A (4)	NaN	0.731376
3643			Q9V9Z0	Q9V9Z0	Ventral spn27A (4)	NaN	0.737657
4856	DNApol-eta		Q9VNX1	Q9VNX1	Ventral spn27A (4)	NaN	0.751051
5029			Q9VR06	Q9VR06	Ventral spn27A (4)	NaN	0.72974
5038			Q9VR44	Q9VR44	Ventral spn27A (4)	NaN	0.710895
5108	CG10099		Q9VRY7;Q8T476	Q9VRY7;Q8T476	Ventral spn27A (4)	NaN	0.635099
5270			Q9VU04	Q9VU04	Ventral spn27A (4)	NaN	0.729619
6336	Dic1		Q9Y166	Q9Y166	Ventral spn27A (4)	NaN	0.71856
3078			Q8MMD0	Q8MMD0	Ventral spn27A (4)	NaN	0.735523
2904	unc-13		X2J9E1;Q8IM87;Q9V483;L0MPR2	X2J9E1;Q8IM87;Q9V483;L0MPR2	Ventral spn27A (4)	NaN	0.734868
2802			Q7KV24	Q7KV24	Ventral spn27A (4)	NaN	0.755509
2524	S2P		Q7JZ56	Q7JZ56	Ventral spn27A (4)	NaN	0.74676
2382	CG4806-RA		Q6IGX8	Q6IGX8	Ventral spn27A (4)	NaN	0.73653
1773	Csat		Q9W4W6;O76865	Q9W4W6;O76865	Ventral spn27A (4)	NaN	0.727103
1092	Fatp		Q9VKU1;E1JHE4	Q9VKU1;E1JHE4	Ventral spn27A (4)	NaN	0.732865
781	CG32795	Transmembrane protein 120 homolog	A4V3W8;Q9U1M2	A4V3W8;Q9U1M2	Ventral spn27A (4)	NaN	0.740403
539	CG17508-RA		A1Z6G4	A1Z6G4	Ventral spn27A (4)	NaN	0.755289
1963	Arl1	ADP-ribosylation factor-like protein 1	P25160	P25160	Ventral spn27A (4)	NaN	0.702975
1881	Lsp1alpha	Larval serum protein 1 alpha chain	P11995	P11995	Ventral spn27A (4)	NaN	0.597021
94	mod	DNA-binding protein modulo	A0A0B4K7G4;P13469	A0A0B4K7G4;P13469	Ventral spn27A (4)	NaN	0.755557
98	sax	Receptor protein serine/threonine kinase	Q95U21;Q7JQ36;A0A0B4K7J3	Q95U21;Q7JQ36;A0A0B4K7J3	Ventral spn27A (4)	NaN	0.794751
125	mahj	Protein mahjong	A0A0B4K8A5;Q9W2F2	A0A0B4K8A5;Q9W2F2	Ventral spn27A (4)	NaN	0.791186
222	140up	RPII140-upstream gene protein	A0A0B4KFZ0;P81928	A0A0B4KFZ0;P81928	Ventral spn27A (4)	NaN	0.79961
225	CG10326	ARL-6-interacting protein 1 homolog	A0A0B4KG41;Q9VES1	A0A0B4KG41;Q9VES1	Ventral spn27A (4)	NaN	0.740388
277	CG17931	Putative SERF-like protein	A0A0B4KH85;Q9VEW2	A0A0B4KH85;Q9VEW2	Ventral spn27A (4)	NaN	0.731443
310	Rlip	RalA-binding protein 1	A0A0B4KHU1;Q9VDG2	A0A0B4KHU1;Q9VDG2	Ventral spn27A (4)	NaN	0.768213
1797	Sec22		O77434;M9PGI6	O77434;M9PGI6	Ventral spn27A (4)	NaN	0.782941
314	PSR	Bifunctional arginine demethylase and lysyl-hydroxylase PSR	A0A0B4KHW1;Q9VD28	A0A0B4KHW1;Q9VD28	Ventral spn27A (4)	NaN	0.811583
337	Map205		A0A0B4KI71	A0A0B4KI71	Ventral spn27A (4)	NaN	0.772409
407			A0A0B4LGA2	A0A0B4LGA2	Ventral spn27A (4)	NaN	0.749744
422	CG3209-RA		A0A0B4LHH1;Q960R0;Q9W1B5;A0A0B4LGJ9	A0A0B4LHH1;Q960R0;Q9W1B5;A0A0B4LGJ9	Ventral spn27A (4)	NaN	0.765388
581	Ance-4		A1Z7M8;A0A0B4LEH6	A1Z7M8;A0A0B4LEH6	Ventral spn27A (4)	NaN	0.573524
594	GstT2		A1Z7X7	A1Z7X7	Ventral spn27A (4)	NaN	0.730577
599			A1Z818;E1JH25;E1JH24	A1Z818;E1JH25;E1JH24	Ventral spn27A (4)	NaN	0.73324
1708	Rab8		O18338;M9NEE8	O18338;M9NEE8	Ventral spn27A (4)	NaN	0.772387
607			Q8T008;A1Z8A7;A8DY95	Q8T008;A1Z8A7;A8DY95	Ventral spn27A (4)	NaN	0.745031
669			A1ZA83	A1ZA83	Ventral spn27A (4)	NaN	0.788907
671			A1ZAA9	A1ZAA9	Ventral spn27A (4)	NaN	0.801439
769	AdipoR	Adiponectin receptor protein	A4V392;Q9VCY8	A4V392;Q9VCY8	Ventral spn27A (4)	NaN	0.791321
780	CG2694-RA		A4V3W7;Q8IRV6;Q9W4W3;Q9VM89	A4V3W7;Q8IRV6;Q9W4W3	Ventral spn27A (4)	NaN	0.767183
790	CkIIbeta	Casein kinase II subunit beta	A4V4C1;M9NGA3;M9NDU6;M9PHA6;P08182	A4V4C1;M9NGA3;M9NDU6;M9PHA6;P08182	Ventral spn27A (4)	NaN	0.797778
841	Hsc20		A8JNT7	A8JNT7	Ventral spn27A (4)	NaN	0.728615
854	Efa6		A8JR82;E2QD55;A8JR81;E2QD56;E1JIT7	A8JR82;E2QD55;A8JR81;E2QD56;E1JIT7	Ventral spn27A (4)	NaN	0.770766
867		DNA-directed RNA polymerase	A8JUY3	A8JUY3	Ventral spn27A (4)	NaN	0.791323
883	retm	Protein real-time	B5RIN0;M9PB50;Q9VMD6	B5RIN0;M9PB50;Q9VMD6	Ventral spn27A (4)	NaN	0.798722
889	ImpL3	L-lactate dehydrogenase	B5RJQ0;Q95028	B5RJQ0;Q95028	Ventral spn27A (4)	NaN	0.527126
911	Fis1		B7YZT3;B7YZT2;A1Z6G3;Q8SYX2	B7YZT3;B7YZT2;A1Z6G3;Q8SYX2	Ventral spn27A (4)	NaN	0.758611
914	CG4668;CG42389-RF		Q9VJJ8;Q9VJJ9;M9PD19;B7YZW3	Q9VJJ8;Q9VJJ9;M9PD19;B7YZW3	Ventral spn27A (4)	NaN	0.76842
1702	Hira	Protein HIRA homolog	O17468	O17468	Ventral spn27A (4)	NaN	0.789805
1046	Sulf1-RA;Sulf1	Extracellular sulfatase SULF-1 homolog	D1Z367;Q9VEX0	D1Z367;Q9VEX0	Ventral spn27A (4)	NaN	0.754784
1068			E1JGK8	E1JGK8	Ventral spn27A (4)	NaN	0.74689
1145	norpA	Phosphoinositide phospholipase C;1-phosphatidylinositol 4,5-bisphosphate phosphodiesterase	X2JCI4;E1JJD5;P13217	X2JCI4;E1JJD5;P13217	Ventral spn27A (4)	NaN	0.735872
1148	sws	Neuropathy target esterase sws	E1JJF4;Q9U969	E1JJF4;Q9U969	Ventral spn27A (4)	NaN	0.783853
1686	ATPsyn-gamma	ATP synthase subunit gamma, mitochondrial	O01666	O01666	Ventral spn27A (4)	NaN	0.786874
1161	pcm		E1JJR3;Q9VWI1	E1JJR3;Q9VWI1	Ventral spn27A (4)	NaN	0.776368
1190	PMCA	Calcium-transporting ATPase	E6EK15;Q9V4C7;Q59DQ0;E6EK17;E6EK18	E6EK15;Q9V4C7;Q59DQ0;E6EK17;E6EK18	Ventral spn27A (4)	NaN	0.660461
1220	Pp2A-29B		M9NDI6;H5V8B8	M9NDI6;H5V8B8	Ventral spn27A (4)	NaN	0.665387
1245	Cnot4		M9MRH8;Q8IPB9;Q9VKX1	M9MRH8;Q8IPB9;Q9VKX1	Ventral spn27A (4)	NaN	0.696534
1639	CG2061	LanC-like protein 3 homolog	M9PH85;Q9Y0Y7	M9PH85;Q9Y0Y7	Ventral spn27A (4)	NaN	0.802289
1263			Q8IRG7;M9MRY7;Q8SZU6	Q8IRG7;M9MRY7;Q8SZU6	Ventral spn27A (4)	NaN	0.565791
1326	Ctr1A		M9NE97;Q9W3X9	M9NE97;Q9W3X9	Ventral spn27A (4)	NaN	0.738114
1330	CanA-14F	Serine/threonine-protein phosphatase;Serine/threonine-protein phosphatase 2B catalytic subunit 3	M9NEL1;Q9VXF1	M9NEL1;Q9VXF1	Ventral spn27A (4)	NaN	0.793415
1397	kraken	Probable serine hydrolase	M9PBM0;O18391	M9PBM0;O18391	Ventral spn27A (4)	NaN	0.791582
1401	NLaz		Q8SXR1;M9PBN2	Q8SXR1;M9PBN2	Ventral spn27A (4)	NaN	0.711193
1459	CG12272	WASH complex subunit strumpellin homolog	M9PCR4;Q9VUY8	M9PCR4;Q9VUY8	Ventral spn27A (4)	NaN	0.751805
1461	Vps60;CG6259	Charged multivesicular body protein 5	M9PCV9;Q9VVI9	M9PCV9;Q9VVI9	Ventral spn27A (4)	NaN	0.789816
1478	skd	Mediator of RNA polymerase II transcription subunit 13	M9PD50;Q7KTX8;A8JNW4	M9PD50;Q7KTX8;A8JNW4	Ventral spn27A (4)	NaN	0.789392
1483	Tep4		M9PD73;M9PDF6;Q9VIT9;M9PDR0	M9PD73;M9PDF6;Q9VIT9;M9PDR0	Ventral spn27A (4)	NaN	0.747092
1556	Pmp70		M9PF96;Q9VWC8	M9PF96;Q9VWC8	Ventral spn27A (4)	NaN	0.79517
1599	CG11448	RILP-like protein homolog	M9PG81;M9PGM0;O76878	M9PG81;M9PGM0;O76878	Ventral spn27A (4)	NaN	0.769543
1623	Tip60	Histone acetyltransferase;Histone acetyltransferase Tip60	M9PH08;M9PGN1;Q960X4	M9PH08;M9PGN1;Q960X4	Ventral spn27A (4)	NaN	0.706356
1883	Lsp1gamma	Larval serum protein 1 gamma chain	P11997	P11997	Ventral spn27A (4)	NaN	0.766945
1924	Pepck	Phosphoenolpyruvate carboxykinase [GTP]	P20007	P20007	Ventral spn27A (4)	NaN	0.782393
1969	tud	Maternal protein tudor	P25823;A0A0B4LG05	P25823;A0A0B4LG05	Ventral spn27A (4)	NaN	0.77819
1972	Pc	Polycomb group protein Pc	P26017	P26017	Ventral spn27A (4)	NaN	0.541183
1975	Dbp73D	Probable ATP-dependent RNA helicase Dbp73D	P26802	P26802	Ventral spn27A (4)	NaN	0.761435
1978	Xpac	DNA repair protein complementing XP-A cells homolog	P28518	P28518	Ventral spn27A (4)	NaN	0.776087
2057	tim	Protein timeless	P49021	P49021	Ventral spn27A (4)	NaN	0.329014
2067	msl-3	Protein male-specific lethal-3	P50536	P50536	Ventral spn27A (4)	NaN	0.788323
2097	scw	Protein screw	X2JB15;P54631	X2JB15;P54631	Ventral spn27A (4)	NaN	0.741134
2130	Nelf-E	Negative elongation factor E	P92204	P92204	Ventral spn27A (4)	NaN	0.791926
2171			Q0E8Q7;E1JHH7	Q0E8Q7	Ventral spn27A (4)	NaN	0.788991
2273	Rbf	Retinoblastoma family protein	Q24472	Q24472	Ventral spn27A (4)	NaN	0.78894
2285	dpn	Protein deadpan	Q26263	Q26263	Ventral spn27A (4)	NaN	0.526288
2341	GstE10		Q4V6J1	Q4V6J1	Ventral spn27A (4)	NaN	0.483873
2375	svr		Q6AWJ5	Q6AWJ5	Ventral spn27A (4)	NaN	0.791452
2399			Q6NP91	Q6NP91	Ventral spn27A (4)	NaN	0.792732
2434			Q7JRC0	Q7JRC0	Ventral spn27A (4)	NaN	0.795708
2469	Br140		Q7JVP4	Q7JVP4	Ventral spn27A (4)	NaN	0.805344
2493	CG8078	Cytoplasmic tRNA 2-thiolation protein 1	Q7JWW5	Q7JWW5	Ventral spn27A (4)	NaN	0.739659
2507	CG9005-RA		Q7JXG9	Q7JXG9	Ventral spn27A (4)	NaN	0.774164
2565			Q7K121	Q7K121	Ventral spn27A (4)	NaN	0.77178
2570			Q7K157	Q7K157	Ventral spn27A (4)	NaN	0.721822
2682	Sara		Q7K9H6	Q7K9H6	Ventral spn27A (4)	NaN	0.804243
2684	Jheh2		Q7KB18	Q7KB18	Ventral spn27A (4)	NaN	0.76325
2690	Tsp42Ee	Tetraspanin	Q7KJ73	Q7KJ73	Ventral spn27A (4)	NaN	0.761347
2726	drosha		Q7KNF1	Q7KNF1	Ventral spn27A (4)	NaN	0.777697
2732	Cyp12d1-d	Probable cytochrome P450 12d1 distal, mitochondrial	Q7KR10	Q7KR10	Ventral spn27A (4)	NaN	0.640797
2751	Csk	Non-specific protein-tyrosine kinase	Q7KSQ2;Q9VGK8;Q8INJ8	Q7KSQ2;Q9VGK8;Q8INJ8	Ventral spn27A (4)	NaN	0.809952
2808	CG13921-RB		Q9W093;Q7KVA8;M9PGV2;M9MRP1	Q9W093;Q7KVA8;M9PGV2;M9MRP1	Ventral spn27A (4)	NaN	0.590827
2898			Q8I937	Q8I937	Ventral spn27A (4)	NaN	0.772779
3099	CG13638		Q8MSB1	Q8MSB1	Ventral spn27A (4)	NaN	0.789336
3122	Pgant35A	Polypeptide N-acetylgalactosaminyltransferase 35A	Q8MVS5	Q8MVS5	Ventral spn27A (4)	NaN	0.803504
2562	Myd88		Q7K105	Q7K105	Ventral spn27A (4)	NaN	0.610397
84	mus210		A0A0B4K739	A0A0B4K739	Ventral spn27A (4)	NaN	0.764931
6544	CG33181-RG		X2JE61;A8JV35;M9PHE6;Q9W3E3;A8JV32	X2JE61;A8JV35;M9PHE6;Q9W3E3;A8JV32	Ventral spn27A (4)	NaN	0.739568
6240	inc		Q9W579	Q9W579	Ventral spn27A (4)	NaN	0.794643
6212			Q9W4U2	Q9W4U2	Ventral spn27A (4)	NaN	0.764608
6182			Q9W4G1	Q9W4G1	Ventral spn27A (4)	NaN	0.765108
6167			Q9W469	Q9W469	Ventral spn27A (4)	NaN	0.519268
6094			Q9W3K4	Q9W3K4	Ventral spn27A (4)	NaN	0.771748
6025			Q9W2T3	Q9W2T3	Ventral spn27A (4)	NaN	0.746408
5984			Q9W293	Q9W293	Ventral spn27A (4)	NaN	0.77851
5801	Aats-pro		Q9VZY9;M9PBJ9	Q9VZY9	Ventral spn27A (4)	NaN	0.811387
5777	IntS10		Q9VZM7	Q9VZM7	Ventral spn27A (4)	NaN	0.791453
5773	ida		Q9VZL2	Q9VZL2	Ventral spn27A (4)	NaN	0.791481
5738		Purple acid phosphatase	Q9VZ56;X2JB52	Q9VZ56;X2JB52	Ventral spn27A (4)	NaN	0.78029
5687			Q9VYK7	Q9VYK7	Ventral spn27A (4)	NaN	0.803754
5684	CG4004-RA		Q9VYJ7;M9PHP0	Q9VYJ7	Ventral spn27A (4)	NaN	0.585921
5658			Q9VYA1;Q9I7S2	Q9VYA1	Ventral spn27A (4)	NaN	0.760519
5634	opm		Q9VXY9	Q9VXY9	Ventral spn27A (4)	NaN	0.754321
5596	CG15914	Glycosyltransferase-like domain-containing protein 1-like	Q9VXN0	Q9VXN0	Ventral spn27A (4)	NaN	0.734179
5566			Q9VXD6	Q9VXD6	Ventral spn27A (4)	NaN	0.804243
5563	CG4768-RA		Q9VXB1	Q9VXB1	Ventral spn27A (4)	NaN	0.659534
5545			Q9VX51;Q86B46	Q9VX51;Q86B46	Ventral spn27A (4)	NaN	0.773945
5507			Q9VWP5;R9PY26	Q9VWP5;R9PY26	Ventral spn27A (4)	NaN	0.788052
5504	Usp39		Q9VWP1	Q9VWP1	Ventral spn27A (4)	NaN	0.791482
5368	CG9706-RA		Q9VVA1	Q9VVA1	Ventral spn27A (4)	NaN	0.774485
5349	mRpS34		Q9VV39	Q9VV39	Ventral spn27A (4)	NaN	0.790326
5340	mRpS31		Q9VUX1	Q9VUX1	Ventral spn27A (4)	NaN	0.808858
5322	AGO2	Protein argonaute-2	Q9VUQ5;M9PFK7;REV__O97365	Q9VUQ5;M9PFK7	Ventral spn27A (4)	NaN	0.783478
5319			Q9VUM3	Q9VUM3	Ventral spn27A (4)	NaN	0.793225
5245	l(3)j2D3		Q9VTT2	Q9VTT2	Ventral spn27A (4)	NaN	0.81272
5219	SuUR	Protein suppressor of underreplication	Q9VTE2	Q9VTE2	Ventral spn27A (4)	NaN	0.781396
5193	path		Q9VT04;Q9VT03	Q9VT04;Q9VT03	Ventral spn27A (4)	NaN	0.773872
5177	Use1	Vesicle transport protein USE1	Q9VSU7	Q9VSU7	Ventral spn27A (4)	NaN	0.794286
5168			Q9VSP0	Q9VSP0	Ventral spn27A (4)	NaN	0.806885
5144			Q9VSG9	Q9VSG9	Ventral spn27A (4)	NaN	0.774127
5138	mus301		Q9VSE2	Q9VSE2	Ventral spn27A (4)	NaN	0.76413
5121	CTCF		Q9VS55	Q9VS55	Ventral spn27A (4)	NaN	0.782456
5100	CG13298	Splicing factor 3B subunit 6-like protein	Q9VRV7	Q9VRV7	Ventral spn27A (4)	NaN	0.756797
5082	Eaf6		Q9VRN3	Q9VRN3	Ventral spn27A (4)	NaN	0.806164
5052	cactin	Cactin	Q9VR99	Q9VR99	Ventral spn27A (4)	NaN	0.791332
5037			Q9VR42	Q9VR42	Ventral spn27A (4)	NaN	0.813038
5030	Bsg25A		Q9VR17	Q9VR17	Ventral spn27A (4)	NaN	0.785866
4994	GABPI	Palmitoyltransferase	Q9VQK9	Q9VQK9	Ventral spn27A (4)	NaN	0.757291
4988			Q9VQJ6;Q8IPZ5	Q9VQJ6;Q8IPZ5	Ventral spn27A (4)	NaN	0.773506
4934			Q9VPU0	Q9VPU0	Ventral spn27A (4)	NaN	0.784783
4882			Q9VP87	Q9VP87	Ventral spn27A (4)	NaN	0.780343
4854	CG7458-RA		Q9VNW8	Q9VNW8	Ventral spn27A (4)	NaN	0.767455
4852			Q9VNW1	Q9VNW1	Ventral spn27A (4)	NaN	0.803382
4844	l(3)04053		Q9VNR6	Q9VNR6	Ventral spn27A (4)	NaN	0.799647
4608			Q9VL06	Q9VL06	Ventral spn27A (4)	NaN	0.813097
4553	CG6488	Conserved oligomeric Golgi complex subunit 8	Q9VKH0	Q9VKH0	Ventral spn27A (4)	NaN	0.801211
4520			Q9VK44	Q9VK44	Ventral spn27A (4)	NaN	0.794308
4512			Q9VK28	Q9VK28	Ventral spn27A (4)	NaN	0.761162
4496			Q9VJY3	Q9VJY3	Ventral spn27A (4)	NaN	0.7572
4495	CG9267-RA		Q9VJX8	Q9VJX8	Ventral spn27A (4)	NaN	0.73635
4493	Sec71		Q9VJW1	Q9VJW1	Ventral spn27A (4)	NaN	0.812663
4440	Swip-1	EF-hand domain-containing protein D2 homolog	X2J6X1;Q9VJ26	X2J6X1;Q9VJ26	Ventral spn27A (4)	NaN	0.81119
4381	NTH1	Endonuclease III homolog	Q9VIH0	Q9VIH0	Ventral spn27A (4)	NaN	0.74628
4353	Dpck		Q9VI57	Q9VI57	Ventral spn27A (4)	NaN	0.779321
4328	CG9630	Probable ATP-dependent RNA helicase DDX55 homolog	Q9VHU1	Q9VHU1	Ventral spn27A (4)	NaN	0.779275
4325	Sgt1		Q9VHT3	Q9VHT3	Ventral spn27A (4)	NaN	0.771722
4310			Q9VHN0	Q9VHN0	Ventral spn27A (4)	NaN	0.722072
4272	JHDM2		Q9VHC5	Q9VHC5	Ventral spn27A (4)	NaN	0.742677
4234	CG6293-RA		Q9VH02	Q9VH02	Ventral spn27A (4)	NaN	0.674488
4158	CG5608-RA		Q9VG59	Q9VG59	Ventral spn27A (4)	NaN	0.810497
4079	Arpc3A	Actin-related protein 2/3 complex subunit 3	Q9VF28	Q9VF28	Ventral spn27A (4)	NaN	0.77884
3976	Dys	Dystrophin, isoforms A/C/F/G/H	Q9VDW6;A0A0B4KGB9;Q9VDW3;A0A0B4KHE2;Q7YU29	Q9VDW6	Ventral spn27A (4)	NaN	0.753579
3937	slmb		Q9VDE3;A0A0B4KHK1	Q9VDE3;A0A0B4KHK1	Ventral spn27A (4)	NaN	0.770792
3909	lqfR		Q9VD13	Q9VD13	Ventral spn27A (4)	NaN	0.762525
3900	EF-G2	Ribosome-releasing factor 2, mitochondrial	Q9VCX4;A0A0B4LIH0	Q9VCX4;A0A0B4LIH0	Ventral spn27A (4)	NaN	0.800462
3852			Q9VCD9	Q9VCD9	Ventral spn27A (4)	NaN	0.763036
3839	CG13609	Protein PTOV1 homolog	Q9VCB1	Q9VCB1	Ventral spn27A (4)	NaN	0.792442
3797	CG10057		Q9VBX5	Q9VBX5	Ventral spn27A (4)	NaN	0.806686
3785			Q9VBU4	Q9VBU4	Ventral spn27A (4)	NaN	0.794366
3769	RpL27	60S ribosomal protein L27	Q9VBN5	Q9VBN5	Ventral spn27A (4)	NaN	0.765409
3751	CG6330-RB		Q9VBA0;Q8IMQ8	Q9VBA0;Q8IMQ8	Ventral spn27A (4)	NaN	0.723513
3709	WASp		Q9VAT0;Q86B74	Q9VAT0;Q86B74	Ventral spn27A (4)	NaN	0.781806
3708			Q9VAR0	Q9VAR0	Ventral spn27A (4)	NaN	0.788498
3705	CG11837	Probable dimethyladenosine transferase	Q9VAQ5	Q9VAQ5	Ventral spn27A (4)	NaN	0.747972
3692	Brd8		Q9VAM5	Q9VAM5	Ventral spn27A (4)	NaN	0.779048
3630	betaGlu	Beta-glucuronidase	Q9V9T9	Q9V9T9	Ventral spn27A (4)	NaN	0.718816
3620	RpL21		Q9V9M7	Q9V9M7	Ventral spn27A (4)	NaN	0.7705
3510	Fkbp14		Q9V3V2	Q9V3V2	Ventral spn27A (4)	NaN	0.808424
3477	out		Q9V3F9	Q9V3F9	Ventral spn27A (4)	NaN	0.772141
3474	lace		Q9V3F2	Q9V3F2	Ventral spn27A (4)	NaN	0.798613
3462	Rich	Guanine nucleotide exchange factor subunit Rich	Q9V3C5	Q9V3C5	Ventral spn27A (4)	NaN	0.799974
3457	Fadd	Fas-associated death domain protein	Q9V3B4	Q9V3B4	Ventral spn27A (4)	NaN	0.759105
3447	cmtr2	Cap-specific mRNA (nucleoside-2-O-)-methyltransferase 2	Q9UAS6	Q9UAS6	Ventral spn27A (4)	NaN	0.811933
3437	ppl	Glycine cleavage system H protein, mitochondrial	Q9U616	Q9U616	Ventral spn27A (4)	NaN	0.714292
3430	xmas-2	Protein xmas-2	Q9U3V9	Q9U3V9	Ventral spn27A (4)	NaN	0.802545
3416	eIF2D		Q9NG60	Q9NG60	Ventral spn27A (4)	NaN	0.800262
3350	Sap47;Sap47-RI	Synapse-associated protein of 47 kDa	Q960T2;F3YDF6;A0A0B4LH71	Q960T2;F3YDF6;A0A0B4LH71	Ventral spn27A (4)	NaN	0.80005
3310	Lhr		Q95RV3	Q95RV3	Ventral spn27A (4)	NaN	0.749041
3306	Pur-alpha		Q95RR6;F3YDK4	Q95RR6;F3YDK4	Ventral spn27A (4)	NaN	0.737258
3263	CG9328-RA		Q8T9H0;Q9VIJ3	Q8T9H0;Q9VIJ3	Ventral spn27A (4)	NaN	0.790258
3233	Zyx		Q8T0F5;Q9N675	Q8T0F5;Q9N675	Ventral spn27A (4)	NaN	0.76594
3183	CG10500		Q8SY25	Q8SY25	Ventral spn27A (4)	NaN	0.752871
3182	Mgstl		Q8SY19;Q8SY70	Q8SY19;Q8SY70	Ventral spn27A (4)	NaN	0.791142
67	CG14299	Ectopic P granules protein 5 homolog	A0A0B4K6N7;Q9VE34	A0A0B4K6N7;Q9VE34	Ventral spn27A (4)	NaN	0.783348
53	pps		Q9VG78;A0A0B4K6G3	Q9VG78;A0A0B4K6G3	Ventral spn27A (4)	NaN	0.79643
1801	Sodh-2		O96299;O97479	O96299	Ventral Tl10B spn27A (5)	0.650009	0.623229
1874	kni	Zygotic gap protein knirps	X2JGX8;P10734;P15370	X2JGX8;P10734	Ventral Tl10B spn27A (5)	0.722057	0.695661
4754			Q9VMP8	Q9VMP8	Ventral Tl10B spn27A (5)	0.743411	0.729977
5126	ltl		Q9VS84	Q9VS84	Ventral Tl10B spn27A (5)	0.713499	0.648036
6335	morgue		Q9Y165	Q9Y165	Ventral Tl10B spn27A (5)	0.760843	0.709484
2225	mtrm	Protein matrimony	Q23973	Q23973	Ventral Tl10B spn27A (5)	0.719673	0.702566
212	Ada2b		A0A0B4KFU2	A0A0B4KFU2	Ventral Tl10B spn27A (5)	0.501885	0.550817
6270	stck		Q9XYA7;Q8INR0;Q8INQ9	Q9XYA7;Q8INR0;Q8INQ9	Ventral Tl10B spn27A (5)	0.718427	0.75429
5424			Q9VVW2	Q9VVW2	Ventral Tl10B spn27A (5)	0.551188	0.574267
1876	LanB1	Laminin subunit beta-1	P11046	P11046	Ventral Tl10B spn27A (5)	0.713213	0.716269
4365	alpha-Est1		Q9VIC3	Q9VIC3	Ventral Tl10B spn27A (5)	0.749138	0.752399
4249	CG12945-RB		Q9VH65;A0A0B4KFJ0	Q9VH65;A0A0B4KFJ0	Ventral Tl10B spn27A (5)	0.729912	0.748619
3819			Q9VC40	Q9VC40	Ventral Tl10B spn27A (5)	0.734513	0.728423
3053	Dredd	Caspase-8;Caspase-8 subunit p15;Caspase-8 subunit p10	X2JHT0;Q8IRY7	X2JHT0;Q8IRY7	Ventral Tl10B spn27A (5)	0.672551	0.695157
2902			Q8IGV3	Q8IGV3	Ventral Tl10B spn27A (5)	0.758893	0.763089
2777	Hdac3	Histone deacetylase	Q7KTS4	Q7KTS4	Ventral Tl10B spn27A (5)	0.744168	0.75835
15	pre-mod(mdg4)-W		A0A0B4JCZ3	A0A0B4JCZ3	Ventral Tl10B spn27A (5)	0.718846	0.72107
47			A0A0B4LIB9;A0A0B4K6A8	A0A0B4LIB9;A0A0B4K6A8	Ventral Tl10B spn27A (5)	0.394812	0.408739
150	Patronin	Patronin	A0A0B4KG58;B7YZJ2;E1JH90;A0A0B4KET5;A0A0B4KFA4;E1JH91;A0A0B4KEY4;A0A0B4KFU3;B7YZJ1;A1ZAU8;A0A0B4KEY6	A0A0B4KG58;B7YZJ2;E1JH90;A0A0B4KET5;A0A0B4KFA4;E1JH91;A0A0B4KEY4;A0A0B4KFU3;B7YZJ1;A1ZAU8;A0A0B4KEY6	Ventral Tl10B spn27A (5)	0.765583	0.784305
233	Tab2		A0A0B4KG87;Q6NQZ7	A0A0B4KG87;Q6NQZ7	Ventral Tl10B spn27A (5)	0.781226	0.787113
269	TAF1B;CG6241	TATA box-binding protein-associated factor RNA polymerase I subunit B	A0A0B4KH26;Q9VH20;A0A0B4KG32	A0A0B4KH26;Q9VH20;A0A0B4KG32	Ventral Tl10B spn27A (5)	0.79064	0.781732
286	Mpc1	Mitochondrial pyruvate carrier 1	A0A0B4KHD3;Q7KSC4	A0A0B4KHD3;Q7KSC4	Ventral Tl10B spn27A (5)	0.745607	0.760612
411	twi	Protein twist	A0A0B4LGC1;P10627	A0A0B4LGC1;P10627	Ventral Tl10B spn27A (5)	0.303796	0.216229
454	CG7218	Protein TAPT1 homolog	A0A0B4LH99;Q9VED0	A0A0B4LH99;Q9VED0	Ventral Tl10B spn27A (5)	0.785126	0.787009
471	Inx3	Innexin;Innexin inx3	A0A0B4LHT3;Q9VAS7	A0A0B4LHT3;Q9VAS7	Ventral Tl10B spn27A (5)	0.743601	0.749833
589	CG8026-RB		Q95T49;A1Z7S4;C9QPE2	Q95T49;A1Z7S4;C9QPE2	Ventral Tl10B spn27A (5)	0.680977	0.735842
748	Syx5	Syntaxin-5	A4V0S1;Q24509	A4V0S1;Q24509	Ventral Tl10B spn27A (5)	0.800847	0.807649
869			A8JV07	A8JV07	Ventral Tl10B spn27A (5)	0.812634	0.811415
970	RpS14b		X2JCX8;C0HKA1;C0HKA0	X2JCX8;C0HKA1;C0HKA0	Ventral Tl10B spn27A (5)	0.768698	0.780338
1111	CG5021	Golgi apparatus membrane protein TVP23 homolog;Uncharacterized Golgi apparatus membrane protein-like protein CG5021	E1JI84;Q8IQC1	E1JI84;Q8IQC1	Ventral Tl10B spn27A (5)	0.796791	0.802614
1142	Kmn2		E1JJ86;Q6IKI1	E1JJ86;Q6IKI1	Ventral Tl10B spn27A (5)	0.750894	0.768328
1182	CG1129	Mannose-1-phosphate guanyltransferase beta	E2QCZ9;Q7JZB4	E2QCZ9;Q7JZB4	Ventral Tl10B spn27A (5)	0.776745	0.766392
1247	tweek		M9MSI8;M9MRP6;M9MRV1;M9MRK7;X2JAP2;X2JA38	M9MSI8;M9MRP6;M9MRV1;M9MRK7;X2JAP2;X2JA38	Ventral Tl10B spn27A (5)	0.685	0.707595
1291	CG16758-RF	Purine nucleoside phosphorylase	Q7KV91;Q7KV95;Q9W004;Q7KV94;M9ND26;M9PE19	Q7KV91;Q7KV95;Q9W004;Q7KV94;M9ND26;M9PE19	Ventral Tl10B spn27A (5)	0.605661	0.641172
1443			X2J9V7;Q8IPG6;M9PCI1	X2J9V7;Q8IPG6;M9PCI1	Ventral Tl10B spn27A (5)	0.715278	0.740468
1590	RhoBTB		M9PIB5;Q9VPG7;M9PG08	M9PIB5;Q9VPG7;M9PG08	Ventral Tl10B spn27A (5)	0.787743	0.799188
1661	JIL-1	Chromosomal serine/threonine-protein kinase JIL-1	M9PI05;Q9V3I5	M9PI05;Q9V3I5	Ventral Tl10B spn27A (5)	0.734356	0.745719
1785	Ip259		O76994	O76994	Ventral Tl10B spn27A (5)	0.749585	0.731097
1864	sna	Protein snail	P08044	P08044	Ventral Tl10B spn27A (5)	0.376496	0.283366
2051	RnrS	Ribonucleoside-diphosphate reductase subunit M2	P48592	P48592	Ventral Tl10B spn27A (5)	0.812106	0.809334
2112	Wsck	Putative tyrosine-protein kinase Wsck	P83097	P83097	Ventral Tl10B spn27A (5)	0.767847	0.747849
2149	Arl2	ADP-ribosylation factor-like protein 2	Q06849	Q06849	Ventral Tl10B spn27A (5)	0.787958	0.78984
2182	mRpL34	39S ribosomal protein L34, mitochondrial	Q0E959	Q0E959	Ventral Tl10B spn27A (5)	0.727514	0.765466
2257	Iap2	Apoptosis 2 inhibitor	Q24307	Q24307	Ventral Tl10B spn27A (5)	0.76516	0.756641
2298			Q29QN4	Q29QN4	Ventral Tl10B spn27A (5)	0.799647	0.809454
2346	UQCR-6.4		Q500Y7	Q500Y7	Ventral Tl10B spn27A (5)	0.751167	0.762528
2388			Q6IL18	Q6IL18	Ventral Tl10B spn27A (5)	0.636941	0.666126
2441	Reep1	Receptor expression-enhancing protein	Q7JRH2;A0A0B4LG73	Q7JRH2	Ventral Tl10B spn27A (5)	0.785581	0.804946
2516			Q7JYQ4	Q7JYQ4	Ventral Tl10B spn27A (5)	0.771676	0.776796
2598			Q7K264	Q7K264	Ventral Tl10B spn27A (5)	0.778836	0.797601
2649			Q7K4L9	Q7K4L9	Ventral Tl10B spn27A (5)	0.756268	0.752349
2787	PNUTS		Q7KU01;Q9VPU9	Q7KU01;Q9VPU9	Ventral Tl10B spn27A (5)	0.800918	0.805172
2832	ND-AGGG		Q7PL91	Q7PL91	Ventral Tl10B spn27A (5)	0.764577	0.770597
2886			Q8I079	Q8I079	Ventral Tl10B spn27A (5)	0.742163	0.799671
2914	CG5484-RA;CG5484-RB		Q8IMR4;Q9VBC5;Q8IMR3	Q8IMR4;Q9VBC5;Q8IMR3	Ventral Tl10B spn27A (5)	0.735948	0.728119
2984			Q8IPT1;Q8IPT0	Q8IPT1;Q8IPT0	Ventral Tl10B spn27A (5)	0.77932	0.763316
3018			Q8IQT0;M9PCW9	Q8IQT0;M9PCW9	Ventral Tl10B spn27A (5)	0.705375	0.746746
3127			Q8MZ22	Q8MZ22	Ventral Tl10B spn27A (5)	0.67133	0.654476
3175			Q8SXU0	Q8SXU0	Ventral Tl10B spn27A (5)	0.773619	0.783776
3251	ATPsynbetaL	ATP synthase subunit beta	Q8T4C4	Q8T4C4	Ventral Tl10B spn27A (5)	0.734279	0.758712
3316			Q95SH7	Q95SH7	Ventral Tl10B spn27A (5)	0.788229	0.791726
3362			Q9I7J4;Q961C8	Q9I7J4;Q961C8	Ventral Tl10B spn27A (5)	0.745874	0.77948
3428	sbr	Nuclear RNA export factor 1	Q9U1H9	Q9U1H9	Ventral Tl10B spn27A (5)	0.797739	0.793625
3478	RpL8	60S ribosomal protein L8	Q9V3G1	Q9V3G1	Ventral Tl10B spn27A (5)	0.757657	0.750984
3507	CG4500	Long-chain-fatty-acid--CoA ligase bubblegum-like	Q9V3U0	Q9V3U0	Ventral Tl10B spn27A (5)	0.504274	0.41806
3566	bip2		Q9V4D4	Q9V4D4	Ventral Tl10B spn27A (5)	0.81569	0.807172
3622	Jupiter;Clamp		Q9V9N4;Q8IGP5;M9PIL6;M9PG92;Q7KAH0;M9NFP1;M9PGG2	Q9V9N4;Q8IGP5	Ventral Tl10B spn27A (5)	0.78401	0.795271
3772	jigr1		Q9VBP5;Q9VIM6	Q9VBP5	Ventral Tl10B spn27A (5)	0.744272	0.762862
3791			Q9VBV8	Q9VBV8	Ventral Tl10B spn27A (5)	0.763946	0.750008
3977	Ino80	Putative DNA helicase Ino80	Q9VDY1	Q9VDY1	Ventral Tl10B spn27A (5)	0.784506	0.773963
4153	Men	Malic enzyme	Q9VG31;Q9VG32;Q2QBM1	Q9VG31;Q9VG32;Q2QBM1	Ventral Tl10B spn27A (5)	0.79621	0.787026
4185	Tango9		Q9VGF5	Q9VGF5	Ventral Tl10B spn27A (5)	0.753486	0.729935
4236	Sirt6	NAD-dependent protein deacetylase Sirt6	Q9VH08	Q9VH08	Ventral Tl10B spn27A (5)	0.720796	0.71632
4288	ird1		Q9VHH2;A0A0B4KGX5	Q9VHH2;A0A0B4KGX5	Ventral Tl10B spn27A (5)	0.803964	0.797519
4431			Q9VJ04	Q9VJ04	Ventral Tl10B spn27A (5)	0.783464	0.784156
4540	CG6770-RA		Q9VKC5	Q9VKC5	Ventral Tl10B spn27A (5)	0.711122	0.715455
4658	Rcd4		Q9VLM6	Q9VLM6	Ventral Tl10B spn27A (5)	0.750151	0.793247
4756			Q9VMQ6	Q9VMQ6	Ventral Tl10B spn27A (5)	0.755838	0.741239
4764	Bub1		Q9VMS5	Q9VMS5	Ventral Tl10B spn27A (5)	0.788231	0.796083
4859			Q9VNX9	Q9VNX9	Ventral Tl10B spn27A (5)	0.762246	0.810992
4885	CG11399-RB		Q9VPB7	Q9VPB7	Ventral Tl10B spn27A (5)	0.750383	0.755362
4953			Q9VQ34	Q9VQ34	Ventral Tl10B spn27A (5)	0.789911	0.79277
4996			Q9VQL2	Q9VQL2	Ventral Tl10B spn27A (5)	0.771361	0.77099
5119			Q9VS52	Q9VS52	Ventral Tl10B spn27A (5)	0.753546	0.780366
5291	Vps36	Vacuolar protein-sorting-associated protein 36	Q9VU87	Q9VU87	Ventral Tl10B spn27A (5)	0.746009	0.757953
5338			Q9VUW0	Q9VUW0	Ventral Tl10B spn27A (5)	0.524219	0.50393
5388			Q9VVH3	Q9VVH3	Ventral Tl10B spn27A (5)	0.771476	0.760969
5614			Q9VXT0	Q9VXT0	Ventral Tl10B spn27A (5)	0.800215	0.743625
5666		Branched-chain-amino-acid aminotransferase	Q9VYD5	Q9VYD5	Ventral Tl10B spn27A (5)	0.592444	0.566728
5796	mRpS35		Q9VZX6;REV__A1Z9E4	Q9VZX6	Ventral Tl10B spn27A (5)	0.789903	0.79809
5810	yellow-g		Q9W029	Q9W029	Ventral Tl10B spn27A (5)	0.755413	0.770157
5939	Pi3K59F	Phosphatidylinositol 3-kinase	Q9W1M7	Q9W1M7	Ventral Tl10B spn27A (5)	0.766506	0.778307
6022	Tango5		Q9W2S1;Q7KVQ7	Q9W2S1;Q7KVQ7	Ventral Tl10B spn27A (5)	0.757826	0.738776
6070	Hexo2		Q9W3C4	Q9W3C4	Ventral Tl10B spn27A (5)	0.738231	0.735126
6153	CG3781	Josephin-like protein	Q9W422	Q9W422	Ventral Tl10B spn27A (5)	0.749934	0.762069
6189	CG3527	Ribosomal RNA small subunit methyltransferase NEP1	Q9W4J5	Q9W4J5	Ventral Tl10B spn27A (5)	0.775885	0.762422
6302	betaggt-II		Q9XZ68	Q9XZ68	Ventral Tl10B spn27A (5)	0.779569	0.797013
6541			X2JCX4	X2JCX4	Ventral Tl10B spn27A (5)	0.763136	0.802169
1616	dm	Myc protein	M9PGK0;Q9W4S7	M9PGK0;Q9W4S7	Ventral Tl10B spn27A (5)	0.340719	0.425341
6545	Zw	Glucose-6-phosphate 1-dehydrogenase	X2JEF0	X2JEF0	Ventral Tl10B spn27A (5)	0.562434	0.580684
6306	MED18	Mediator of RNA polymerase II transcription subunit 18	Q9XZT1;B7Z116	Q9XZT1	Ventral Tl10B spn27A (5)	0.759494	0.733473
6191			Q9W4J7	Q9W4J7	Ventral Tl10B spn27A (5)	0.771626	0.781567
6179			X2JE64;Q9W4D4	X2JE64;Q9W4D4	Ventral Tl10B spn27A (5)	0.744121	0.784815
6081			Q9W3F5	Q9W3F5	Ventral Tl10B spn27A (5)	0.733901	0.757801
6069			Q9W3C3	Q9W3C3	Ventral Tl10B spn27A (5)	0.780044	0.767242
5988			Q9W2B3	Q9W2B3	Ventral Tl10B spn27A (5)	0.791143	0.781713
5896	CG4692	Putative ATP synthase subunit f, mitochondrial	Q9W141	Q9W141	Ventral Tl10B spn27A (5)	0.754084	0.760595
5809	yellow-g2		Q9W028	Q9W028	Ventral Tl10B spn27A (5)	0.741409	0.738306
5770	Mul1		Q9VZJ9	Q9VZJ9	Ventral Tl10B spn27A (5)	0.785508	0.764142
5638			Q9VY02	Q9VY02	Ventral Tl10B spn27A (5)	0.792566	0.789642
5422			Q9VVU6	Q9VVU6	Ventral Tl10B spn27A (5)	0.803176	0.814664
5379			Q9VVD3	Q9VVD3	Ventral Tl10B spn27A (5)	0.781045	0.78314
5300			Q9VUC3	Q9VUC3	Ventral Tl10B spn27A (5)	0.764046	0.747789
5209	vnc		Q9VT75	Q9VT75	Ventral Tl10B spn27A (5)	0.73512	0.770974
5019			Q9VQY7	Q9VQY7	Ventral Tl10B spn27A (5)	0.769253	0.762342
4978	Cwc25		Q9VQF5	Q9VQF5	Ventral Tl10B spn27A (5)	0.802339	0.798949
4930	cold		Q9VPR7	Q9VPR7	Ventral Tl10B spn27A (5)	0.775386	0.77901
4876	CG12975	Multifunctional methyltransferase subunit TRM112-like protein	Q9VP65	Q9VP65	Ventral Tl10B spn27A (5)	0.748453	0.7469
4792			Q9VN39;Q8T0Q2	Q9VN39;Q8T0Q2	Ventral Tl10B spn27A (5)	0.786426	0.800695
4758	CG7371-RA		Q9VMQ8	Q9VMQ8	Ventral Tl10B spn27A (5)	0.791491	0.781048
4707	Mnn1		Q9VM47;Q8SXU2	Q9VM47;Q8SXU2	Ventral Tl10B spn27A (5)	0.802165	0.808329
4643	FucTB	Alpha-(1,3)-fucosyltransferase B	X2J5D8;Q9VLC1;B9EQY2	X2J5D8;Q9VLC1;B9EQY2	Ventral Tl10B spn27A (5)	0.671128	0.659176
4532			Q9VK90;M9PBA6	Q9VK90;M9PBA6	Ventral Tl10B spn27A (5)	0.786534	0.805057
4357			Q9VI70	Q9VI70	Ventral Tl10B spn27A (5)	0.810318	0.813799
4239	gammaSnap2		Q9VH25	Q9VH25	Ventral Tl10B spn27A (5)	0.755121	0.782358
4217	Adk3	GTP:AMP phosphotransferase, mitochondrial	Q9VGU6;REV__Q9VZS5;REV__D1Z3A1	Q9VGU6	Ventral Tl10B spn27A (5)	0.770869	0.766631
4179			Q9VGE3	Q9VGE3	Ventral Tl10B spn27A (5)	0.733734	0.773988
4119			Q9VFJ1	Q9VFJ1	Ventral Tl10B spn27A (5)	0.769543	0.768352
3960	trem		Q9VDQ4	Q9VDQ4	Ventral Tl10B spn27A (5)	0.739864	0.758494
3778	MED28	Mediator of RNA polymerase II transcription subunit 28	Q9VBQ9	Q9VBQ9	Ventral Tl10B spn27A (5)	0.744962	0.748201
3754			Q9VBC4	Q9VBC4	Ventral Tl10B spn27A (5)	0.749854	0.774893
3610	CG5189	Ragulator complex protein LAMTOR2 homolog	Q9V8I2	Q9V8I2	Ventral Tl10B spn27A (5)	0.798268	0.777489
3563	CG11076-RA		Q9V493;Q7KQM8	Q9V493;Q7KQM8	Ventral Tl10B spn27A (5)	0.78945	0.773417
3503	mus81		Q9V3T1	Q9V3T1	Ventral Tl10B spn27A (5)	0.799765	0.796636
3432	Surf1	SURF1-like protein	Q9U4F3	Q9U4F3	Ventral Tl10B spn27A (5)	0.781117	0.784612
3392	BcDNA.GH02384		Q9Y168;Q9I7L9	Q9Y168;Q9I7L9	Ventral Tl10B spn27A (5)	0.765847	0.74977
3356	Hrs	Hepatocyte growth factor-regulated tyrosine kinase substrate	Q960X8	Q960X8	Ventral Tl10B spn27A (5)	0.805042	0.80585
3268	ifc		Q94515;M9PC47	Q94515	Ventral Tl10B spn27A (5)	0.752877	0.748156
3242	MESK2		Q8T0V2;Q7KVN1;Q9I7V7;Q9I7V6	Q8T0V2;Q7KVN1;Q9I7V7;Q9I7V6	Ventral Tl10B spn27A (5)	0.801931	0.79938
3174	SNF4Agamma		Q8SXT8	Q8SXT8	Ventral Tl10B spn27A (5)	0.752401	0.779821
3095	mRpL35	39S ribosomal protein L35, mitochondrial	Q8MS27	Q8MS27	Ventral Tl10B spn27A (5)	0.743925	0.777169
3009			Q8IQI5;Q8IQI4	Q8IQI5;Q8IQI4	Ventral Tl10B spn27A (5)	0.759547	0.743008
2925	wfs1		Q8IMZ9;A0A0B4JDG5	Q8IMZ9;A0A0B4JDG5	Ventral Tl10B spn27A (5)	0.745388	0.748814
2913	CG5815	Protein SPT2 homolog	Q8IMP6	Q8IMP6	Ventral Tl10B spn27A (5)	0.597663	0.648688
2843	IntS3	Integrator complex subunit 3 homolog	Q7PLS8	Q7PLS8	Ventral Tl10B spn27A (5)	0.812007	0.814365
2800	AlkB		Q7KUZ2	Q7KUZ2	Ventral Tl10B spn27A (5)	0.683142	0.708793
2705	Ercc1		Q7KMG7	Q7KMG7	Ventral Tl10B spn27A (5)	0.770172	0.765623
2635			Q7K3Z8	Q7K3Z8	Ventral Tl10B spn27A (5)	0.620279	0.604445
2584			Q7K1R6	Q7K1R6	Ventral Tl10B spn27A (5)	0.40137	0.425351
2500	L		Q7JXA2	Q7JXA2	Ventral Tl10B spn27A (5)	0.765799	0.803947
2440	Syx6		Q86P32;Q7JRF1;Q7JY00	Q86P32;Q7JRF1;Q7JY00	Ventral Tl10B spn27A (5)	0.726443	0.778135
2353	AcCoAS	Acetyl-coenzyme A synthetase	Q59E09;Q9VP61	Q59E09;Q9VP61	Ventral Tl10B spn27A (5)	0.722136	0.732839
2320			Q4QPR8	Q4QPR8	Ventral Tl10B spn27A (5)	0.793264	0.796107
2267	l(2)dtl	Protein lethal(2)denticleless	Q24371	Q24371	Ventral Tl10B spn27A (5)	0.771028	0.784652
2188	RpS11	40S ribosomal protein S11	Q0E9B6;A1Z8U9	Q0E9B6;A1Z8U9	Ventral Tl10B spn27A (5)	0.761692	0.759183
2180	Dgp-1		Q0E931	Q0E931	Ventral Tl10B spn27A (5)	0.720364	0.735402
2133	Mdr49	Multidrug resistance protein homolog 49	Q00449;E1JH49	Q00449;E1JH49	Ventral Tl10B spn27A (5)	0.442747	0.395278
2068	RpL9	60S ribosomal protein L9	X2JDU0;P50882	X2JDU0;P50882	Ventral Tl10B spn27A (5)	0.767533	0.768447
1919	mt:Cyt-b	Cytochrome b	P18935	P18935	Ventral Tl10B spn27A (5)	0.733636	0.742697
1791	CG4061	RNA 3-terminal phosphate cyclase	X2JI07;O77264	X2JI07;O77264	Ventral Tl10B spn27A (5)	0.72203	0.733821
1671			M9PIC3;Q9VPD3	M9PIC3;Q9VPD3	Ventral Tl10B spn27A (5)	0.739242	0.758796
1649	RpL18	60S ribosomal protein L18	M9PHM6;Q9VS34	M9PHM6;Q9VS34	Ventral Tl10B spn27A (5)	0.757732	0.753525
1575	vir-1		Q8SXD5;M9PFQ2;Q0E8R1	Q8SXD5;M9PFQ2;Q0E8R1	Ventral Tl10B spn27A (5)	0.734427	0.737824
1398	U2af38	Splicing factor U2af 38 kDa subunit	M9PBM1;Q94535	M9PBM1;Q94535	Ventral Tl10B spn27A (5)	0.772111	0.798887
1284			M9NCT3;Q9VKL9;M9NEE5;Q8IPB2	M9NCT3;Q9VKL9;M9NEE5;Q8IPB2	Ventral Tl10B spn27A (5)	0.726893	0.729504
1240	RpL37A	60S ribosomal protein L37a	M9MRF2;Q9VMU4	M9MRF2;Q9VMU4	Ventral Tl10B spn27A (5)	0.762472	0.754929
1175	BicC	Protein bicaudal C	E2QCR4;Q24009	E2QCR4;Q24009	Ventral Tl10B spn27A (5)	0.763289	0.748045
1139			E1JIZ7	E1JIZ7	Ventral Tl10B spn27A (5)	0.751264	0.804828
1096	CdGAPr	GTPase-activating protein CdGAPr	E1JHM1;M9PDR8;Q9VIS1;E1JHM0	E1JHM1;M9PDR8;Q9VIS1;E1JHM0	Ventral Tl10B spn27A (5)	0.81181	0.813714
874	UQCR-11	Cytochrome b-c1 complex subunit 6	A8Y535	A8Y535	Ventral Tl10B spn27A (5)	0.779489	0.767596
814	Traf4		A8DYU9;Q9XYR0	A8DYU9;Q9XYR0	Ventral Tl10B spn27A (5)	0.725501	0.722392
737	app	Palmitoyltransferase	A2VEY9;Q9VTV6	A2VEY9;Q9VTV6	Ventral Tl10B spn27A (5)	0.698161	0.72662
573	beta3GalTII		A1Z7G9	A1Z7G9	Ventral Tl10B spn27A (5)	0.684887	0.694599
465	CG6982-RC		Q9VCV1;A0A0B4LHK8	Q9VCV1;A0A0B4LHK8	Ventral Tl10B spn27A (5)	0.614977	0.621811
433	Amy-p;Amy-d	Alpha-amylase;Alpha-amylase B;Alpha-amylase A	A0A0B4LGS0;P81641;P08144	A0A0B4LGS0;P81641;P08144	Ventral Tl10B spn27A (5)	0.660228	0.731049
372			A0A0B4LFF6;Q7K3C2	A0A0B4LFF6;Q7K3C2	Ventral Tl10B spn27A (5)	0.764001	0.708312
278			A0A0B4KH87;Q9VAT1	A0A0B4KH87;Q9VAT1	Ventral Tl10B spn27A (5)	0.746368	0.76192
235	l(3)neo38-RA;l(3)neo38		E0R905;Q7KSP5;A0A0B4KGA3;A0A0B4K6S1;A0A0B4K6F4;Q8SZN9	E0R905;Q7KSP5;A0A0B4KGA3;A0A0B4K6S1;A0A0B4K6F4;Q8SZN9	Ventral Tl10B spn27A (5)	0.709712	0.745277
195	RanBPM		A0A0B4KFL0	A0A0B4KFL0	Ventral Tl10B spn27A (5)	0.758703	0.778964
82	Tfb1	General transcription factor IIH subunit 1	A0A0B4K726;Q960E8	A0A0B4K726;Q960E8	Ventral Tl10B spn27A (5)	0.79248	0.807452
21	CG2246-RB;CG2246-RA		A0A0B4JD23;Q8IMI0;A0A0B4JDE3;Q9VA53;A0A0B4KHJ3;A0A0B4KHF5	A0A0B4JD23;Q8IMI0;A0A0B4JDE3;Q9VA53;A0A0B4KHJ3;A0A0B4KHF5	Ventral Tl10B spn27A (5)	0.7305	0.755653
4562			Q9VKJ5	Q9VKJ5	Ventral Tl10B spn27A (5)	0.699177	0.733366
4148	CG17327-RA		Q9VG06	Q9VG06	Ventral Tl10B spn27A (5)	0.72554	0.771597
4104	Spn88Eb		Q9VFC1	Q9VFC1	Ventral Tl10B spn27A (5)	0.552857	0.678605
4038			Q9VEM0	Q9VEM0	Ventral Tl10B spn27A (5)	0.719669	0.75494
3021	GS	Glutathione synthetase	Q8IQZ1	Q8IQZ1	Ventral Tl10B spn27A (5)	0.540056	0.609483
2358			Q5BI03	Q5BI03	Ventral Tl10B spn27A (5)	0.713209	0.738199
2117	His2A:CG33859;His2A	Histone H2A	Q4AB57;P84051	Q4AB57;P84051	Ventral Tl10B spn27A (5)	0.720371	0.766604
1920	tra2	Transformer-2 sex-determining protein	P19018	P19018	Ventral Tl10B spn27A (5)	0.462613	0.570359
743	S	Protein Star	A4UZY2;P42519	A4UZY2;P42519	Ventral Tl10B spn27A (5)	0.714609	0.756098
4654	U26	Acyl-CoA synthetase family member 4 homolog	Q9VLL0;X2J591	Q9VLL0	Ventral Tl10B spn27A (5)	0.669568	0.695553
5502			Q9VWN9	Q9VWN9	Ventral Tl10B spn27A (5)	0.721318	0.749
203	Tsp86D	Tetraspanin	Q9VGV3;A0A0B4KFQ5	Q9VGV3;A0A0B4KFQ5	Ventral Tl10B spn27A (5)	0.484041	0.553277
3655			Q9VA79	Q9VA79	Ventral Tl10B spn27A (5)	0.737838	0.752321
3074	Idgf3	Chitinase-like protein Idgf3	Q8MLZ7;X2JA18;REV__O76460	Q8MLZ7;X2JA18	Ventral Tl10B spn27A (5)	0.703447	0.7433
3733			Q9VB17	Q9VB17	Ventral Tl10B spn27A (5)	0.725051	0.733188
1177	CG3961-RD;CG3961-RA		E2QCY2;M9PCX4;Q9VVT8	E2QCY2;M9PCX4;Q9VVT8	Ventral Tl10B spn27A (5)	0.637597	0.646244
1118	neur	Protein neuralized	E1JIG1;P29503	E1JIG1;P29503	Ventral Tl10B spn27A (5)	0.741588	0.734975
4386	Pomp		Q9VIJ5	Q9VIJ5	Ventral Tl10B spn27A (5)	0.755903	0.73538
6214	EG:100G10.6		Q9W4W7	Q9W4W7	Ventral Tl10B spn27A (5)	0.735341	0.760882
56	spartin	Protein spartin	A0A0B4K6I5;Q9VN45	A0A0B4K6I5;Q9VN45	Ventral Tl10B spn27A (5)	0.722204	0.75091
281	m-cup		A0A0B4KHA0;Q9I7J2	A0A0B4KHA0;Q9I7J2	Dorsal + Lateral (6)	0.76491	0.744502
442	Unc-115a		A0A0B4LGY0;A0A0B4LGZ0;Q9VH91;E1JIH1;A0A0B4LI11;A0A0B4LGY1;E1JIH2;E1JIH3	A0A0B4LGY0;A0A0B4LGZ0;Q9VH91;E1JIH1;A0A0B4LI11;A0A0B4LGY1;E1JIH2;E1JIH3	Dorsal + Lateral (6)	0.6765	0.788954
5482			Q9VWF8	Q9VWF8	Dorsal + Lateral (6)	0.804129	0.787734
5851			Q9W0J9	Q9W0J9	Dorsal + Lateral (6)	0.733774	0.71795
2269	Lsp2	Larval serum protein 2	X2JCV2;Q24388	X2JCV2;Q24388	Dorsal + Lateral (6)	0.756974	0.702363
4333			Q9VHW0	Q9VHW0	Dorsal + Lateral (6)	0.693983	0.737112
4627			Q9VL67	Q9VL67	Dorsal + Lateral (6)	0.756071	0.621969
5861	Vti1		Q9W0N6	Q9W0N6	Dorsal + Lateral (6)	0.7707	0.748413
3253			Q8T4D6	Q8T4D6	Dorsal + Lateral (6)	0.681669	0.797693
741	Sam-S	S-adenosylmethionine synthase	A4UZW2;E4NKH6;M9PAY2;REV__O96827;REV__A0A0B4LFL3	A4UZW2	Dorsal + Lateral (6)	0.654943	0.727484
1677	z	Regulatory protein zeste	Q7YU84;M9PIU6;P09956	Q7YU84;M9PIU6;P09956	Dorsal + Lateral (6)	0.820594	0.802759
5033			Q9VR30	Q9VR30	Dorsal + Lateral (6)	0.757197	0.734098
5014			Q9VQU0	Q9VQU0	Dorsal + Lateral (6)	0.818309	0.776571
1431			M9PCQ7;M9PCB8;M9PB51;M9PC63;A8DYW2;M9PCC2;Q9VMA9;M9PEV6	M9PCQ7;M9PCB8;M9PB51;M9PC63;A8DYW2;M9PCC2;Q9VMA9;M9PEV6	Dorsal + Lateral (6)	0.764229	0.747141
605	CG12896		A1Z893	A1Z893	Dorsal + Lateral (6)	0.728234	0.722591
200	gpp	Histone-lysine N-methyltransferase, H3 lysine-79 specific	A0A0B4KFP4;Q8INR6	A0A0B4KFP4;Q8INR6	Dorsal + Lateral (6)	0.745599	0.765379
320	Ets97D	DNA-binding protein Ets97D	A0A0B4KHY6;Q04688	A0A0B4KHY6;Q04688	Dorsal + Lateral (6)	0.616867	0.766106
1355	DOR		Q9VZC7;M9NFM7;A8JNK7;Q8IRB4	Q9VZC7;M9NFM7;A8JNK7;Q8IRB4	Dorsal + Lateral (6)	0.540203	0.715411
1515	CG5568		M9PEA1;Q9VRQ5	M9PEA1;Q9VRQ5	Dorsal + Lateral (6)	0.711247	0.752419
1568	D;Sox21a;Sox21b	SOX domain-containing protein dichaete	M9PFL2;Q24533;Q9VUD1;M9PFG6;Q9VUD3;M9PCG2	M9PFL2;Q24533;Q9VUD1;M9PFG6;Q9VUD3;M9PCG2	Dorsal + Lateral (6)	0.70098	0.749311
2790	Idh	Isocitrate dehydrogenase [NADP]	Q7KUB1	Q7KUB1	Dorsal + Lateral (6)	0.53565	0.712094
3056			Q8MKJ6	Q8MKJ6	Dorsal + Lateral (6)	0.757891	0.797179
4760			Q9VMR0	Q9VMR0	Dorsal + Lateral (6)	0.769917	0.779966
5732			Q9VZ24	Q9VZ24	Dorsal + Lateral (6)	0.618758	0.775142
6155	Spx		Q9W424	Q9W424	Dorsal + Lateral (6)	0.737034	0.780515
6224	Mct1		Q9W509	Q9W509	Dorsal + Lateral (6)	0.728107	0.756733
720	18w		A1ZBR2	A1ZBR2	Dorsal + Lateral (6)	0.700313	0.747174
630	CG33672-RA		A1Z933	A1Z933	Dorsal + Lateral (6)	0.751751	0.749695
503	Nplp2	Neuropeptide-like 2	X2JB24;A0A0S0WH10;Q9VU58	X2JB24;A0A0S0WH10;Q9VU58	Dorsal + Lateral (6)	0.732521	0.784259
489	CG4091	Tumor necrosis factor alpha-induced protein 8-like protein	A0A0C4DHD1;Q7KVH9	A0A0C4DHD1;Q7KVH9	Dorsal + Lateral (6)	0.735338	0.768465
92			A0A0B4K7D8;Q7K161	A0A0B4K7D8;Q7K161	Dorsal + Lateral (6)	0.850443	0.836576
6105	Nek2		Q9W3N8	Q9W3N8	Dorsal + Lateral (6)	0.812325	0.77154
6048	mxc		Q9W363	Q9W363	Dorsal + Lateral (6)	0.786114	0.793331
6011	Magi		Q9W2L2	Q9W2L2	Dorsal + Lateral (6)	0.832719	0.787906
5814			Q9W042;Q8IRF6	Q9W042;Q8IRF6	Dorsal + Lateral (6)	0.830426	0.789143
5775	Ccz1		Q9VZL5	Q9VZL5	Dorsal + Lateral (6)	0.843806	0.823992
5751	PMP34		Q9VZD9	Q9VZD9	Dorsal + Lateral (6)	0.791793	0.79151
5617	CG9213	CWF19-like protein 2 homolog	X2JKF2;Q9VXT5	X2JKF2;Q9VXT5	Dorsal + Lateral (6)	0.824021	0.793648
5587		Putative rRNA methyltransferase	Q9VXK5	Q9VXK5	Dorsal + Lateral (6)	0.834551	0.838369
5442			Q9VW38	Q9VW38	Dorsal + Lateral (6)	0.818728	0.803559
5332	DCP2		Q9VUU4;Q86NM7	Q9VUU4;Q86NM7	Dorsal + Lateral (6)	0.788548	0.773741
5296	upSET		Q9VUB5	Q9VUB5	Dorsal + Lateral (6)	0.785274	0.783738
5207			Q9VT73	Q9VT73	Dorsal + Lateral (6)	0.768217	0.756079
5093			Q9VRT6	Q9VRT6	Dorsal + Lateral (6)	0.718512	0.812704
5084			Q9VRP2	Q9VRP2	Dorsal + Lateral (6)	0.841076	0.834716
5021	Psf2	Probable DNA replication complex GINS protein PSF2	Q9VQY9	Q9VQY9	Dorsal + Lateral (6)	0.830874	0.833085
4970			Q9VQB4	Q9VQB4	Dorsal + Lateral (6)	0.793096	0.769651
4960	Npc2a	Protein NPC2 homolog	Q9VQ62	Q9VQ62	Dorsal + Lateral (6)	0.813851	0.796671
4893	mTerf3		Q9VPD5	Q9VPD5	Dorsal + Lateral (6)	0.773792	0.755984
4877			Q9VP69	Q9VP69	Dorsal + Lateral (6)	0.813236	0.788864
4726	CG9551		Q9VMC3	Q9VMC3	Dorsal + Lateral (6)	0.813826	0.802767
4710			Q9VM51	Q9VM51	Dorsal + Lateral (6)	0.817758	0.777207
4446	ssp3		X2J6U8;Q9VJ35	X2J6U8;Q9VJ35	Dorsal + Lateral (6)	0.829847	0.792198
4425	CG17544-RA	Acyl-coenzyme A oxidase	Q9VIX4	Q9VIX4	Dorsal + Lateral (6)	0.680722	0.682492
4315			Q9VHN8	Q9VHN8	Dorsal + Lateral (6)	0.831836	0.787649
4277			Q9VHE3	Q9VHE3	Dorsal + Lateral (6)	0.780626	0.782565
4133	CG9588	26S proteasome non-ATPase regulatory subunit 9	Q9VFS8	Q9VFS8	Dorsal + Lateral (6)	0.840892	0.822373
4029	alt		Q9VEH0	Q9VEH0	Dorsal + Lateral (6)	0.522851	0.522851
3951			Q9VDK9	Q9VDK9	Dorsal + Lateral (6)	0.832098	0.833651
3884		Aminoacylase-1	Q9VCR2;Q8T490	Q9VCR2	Dorsal + Lateral (6)	0.828419	0.811296
3881	EloA	Transcription elongation factor B polypeptide 3	Q9VCP0	Q9VCP0	Dorsal + Lateral (6)	0.80681	0.765021
3864	eIF4G2		Q9VCH1	Q9VCH1	Dorsal + Lateral (6)	0.788313	0.786274
3830	ana1		Q9VC64	Q9VC64	Dorsal + Lateral (6)	0.802533	0.762376
3749			Q9VB96;A0A0B4K6I6	Q9VB96;A0A0B4K6I6	Dorsal + Lateral (6)	0.82973	0.823938
3737	Klp98A	Kinesin-like protein	Q9VB25	Q9VB25	Dorsal + Lateral (6)	0.805485	0.743654
3687	alph		Q9VAK1	Q9VAK1	Dorsal + Lateral (6)	0.820501	0.802789
3650	wts	Serine/threonine-protein kinase Warts	Q9VA38	Q9VA38	Dorsal + Lateral (6)	0.822079	0.804827
3514	EndoGI		Q9V3V9	Q9V3V9	Dorsal + Lateral (6)	0.824649	0.818707
3443	rdgBbeta	Cytoplasmic phosphatidylinositol transfer protein 1	Q9U9P7	Q9U9P7	Dorsal + Lateral (6)	0.839114	0.839689
3411	chb	CLIP-associating protein	Q9NBD7	Q9NBD7	Dorsal + Lateral (6)	0.811084	0.791598
3317			Q95SI7	Q95SI7	Dorsal + Lateral (6)	0.846777	0.831024
3305	Pi3K68D		Q95RR5	Q95RR5	Dorsal + Lateral (6)	0.814174	0.784038
3278	Atu	Another transcription unit protein	Q94546	Q94546	Dorsal + Lateral (6)	0.830817	0.833598
3108	Sym	Symplekin	Q8MSU4	Q8MSU4	Dorsal + Lateral (6)	0.825316	0.801683
3098			Q8MS69	Q8MS69	Dorsal + Lateral (6)	0.849332	0.804105
2977	l(2)05714		Q9VMX2;Q8IPL4	Q9VMX2;Q8IPL4	Dorsal + Lateral (6)	0.796021	0.775609
2773	Rtnl1	Reticulon-like protein	Q7KTP4;E1JHT9;Q9VMW2;Q9VMW4	Q7KTP4;E1JHT9;Q9VMW2;Q9VMW4	Dorsal + Lateral (6)	0.848383	0.805978
2737	Fer1HCH	Ferritin	Q7KRU8;Q8I0T0	Q7KRU8;Q8I0T0	Dorsal + Lateral (6)	0.83196	0.826933
2698	Cct5		Q7KKI0;A1Z8U4	Q7KKI0;A1Z8U4	Dorsal + Lateral (6)	0.855633	0.838341
2687			Q7KGU6;Q95R82	Q7KGU6;Q95R82	Dorsal + Lateral (6)	0.800155	0.795511
2615	Atf6		Q7K2V1;Q8SX87	Q7K2V1;Q8SX87	Dorsal + Lateral (6)	0.836733	0.814581
2326			Q4QQB9	Q4QQB9	Dorsal + Lateral (6)	0.671322	0.536497
2268	Lac	Lachesin	Q24372	Q24372	Dorsal + Lateral (6)	0.818124	0.767548
2204	CG42259-RA		Q0KHX4	Q0KHX4	Dorsal + Lateral (6)	0.762587	0.751743
2099	RpS20	40S ribosomal protein S20	P55828	P55828	Dorsal + Lateral (6)	0.85891	0.845277
2071	bys	Bystin	P51406	P51406	Dorsal + Lateral (6)	0.787836	0.784292
2056	pelo	Protein pelota	P48612	P48612	Dorsal + Lateral (6)	0.797102	0.760003
2036	tsr	Cofilin/actin-depolymerizing factor homolog	P45594	P45594	Dorsal + Lateral (6)	0.848203	0.839477
1959	Cyp1	Peptidyl-prolyl cis-trans isomerase	P25007;Q7K2I4	P25007	Dorsal + Lateral (6)	0.858442	0.844237
1951	Vha16-1	V-type proton ATPase 16 kDa proteolipid subunit	P23380;Q8IQG3	P23380	Dorsal + Lateral (6)	0.765626	0.76908
1917	mt:ND3	NADH-ubiquinone oxidoreductase chain 3	P18930	P18930	Dorsal + Lateral (6)	0.855339	0.783185
1875	Act5C	Actin-5C	X2JCP8;P10987	X2JCP8;P10987	Dorsal + Lateral (6)	0.865432	0.838155
1841	Yp1	Vitellogenin-1	X2JD55;P02843	X2JD55;P02843	Dorsal + Lateral (6)	0.84961	0.826882
1827	Adh	Alcohol dehydrogenase	P00334	P00334	Dorsal + Lateral (6)	0.869209	0.851665
1741	hth	Homeobox protein homothorax	O46339	O46339	Dorsal + Lateral (6)	0.822247	0.781419
1633	fend	Transmembrane protein fend	M9PH27;Q9GNL3	M9PH27;Q9GNL3	Dorsal + Lateral (6)	0.857956	0.831676
1624	oc	Homeotic protein ocelliless	M9PGZ9;M9PGN9;P22810	M9PGZ9;M9PGN9;P22810	Dorsal + Lateral (6)	0.757054	0.698562
1612			M9PGG8;Q8T415	M9PGG8	Dorsal + Lateral (6)	0.840717	0.816967
1489	vari		M9PDB2;Q7KT16;Q2PDR9;Q9VIJ4	M9PDB2;Q7KT16;Q2PDR9;Q9VIJ4	Dorsal + Lateral (6)	0.865108	0.844915
1395	RpLP1	60S acidic ribosomal protein P1	M9PBK5;P08570	M9PBK5;P08570	Dorsal + Lateral (6)	0.858474	0.835888
1237	RpL27A	60S ribosomal protein L27a	M9MRC9;P41092	M9MRC9;P41092	Dorsal + Lateral (6)	0.841623	0.814949
1133	CG5902	Uncharacterized protein CG5902	E1JIV0;Q9VCF0	E1JIV0;Q9VCF0	Dorsal + Lateral (6)	0.859132	0.850766
1088	uif		Q9VM55;E1JHA6	Q9VM55;E1JHA6	Dorsal + Lateral (6)	0.800801	0.766561
1057	PebIII-RA;PebIII	Ejaculatory bulb-specific protein 3	D5A7M1;Q9W1C9	D5A7M1;Q9W1C9	Dorsal + Lateral (6)	0.811411	0.785132
1048	ATPsyn-Cf6-RA;ATPsyn-Cf6	ATP synthase-coupling factor 6, mitochondrial	D1Z3A2;Q24407	D1Z3A2;Q24407	Dorsal + Lateral (6)	0.822885	0.817054
985	Moe		M9PHG2;C7LAH9	M9PHG2;C7LAH9	Dorsal + Lateral (6)	0.827016	0.791567
982	Hsc70-4-RA;Hsc70-4	Heat shock 70 kDa protein cognate 4	C7LA75;P11147	C7LA75;P11147	Dorsal + Lateral (6)	0.850815	0.830341
648	shot		A1Z9J3	A1Z9J3	Dorsal + Lateral (6)	0.802277	0.758114
703	GstE8		A1ZB73	A1ZB73	Dorsal + Lateral (6)	0.607435	0.593844
706	mRpS28		A1ZBA5	A1ZBA5	Dorsal + Lateral (6)	0.827825	0.802681
817	CG34310-RA		A8DYW4;A0A0S0WGS4	A8DYW4;A0A0S0WGS4	Dorsal + Lateral (6)	0.688087	0.765082
881	Spase25	Signal peptidase complex subunit 2	B4F5U4;Q9VYY2	B4F5U4;Q9VYY2	Dorsal + Lateral (6)	0.860631	0.838969
905	CG9865-RA		B7YZN6	B7YZN6	Dorsal + Lateral (6)	0.718043	0.825678
915			M9PG55;Q9VJ42;B7YZX6	M9PG55;Q9VJ42;B7YZX6	Dorsal + Lateral (6)	0.797279	0.819836
946	Snup		B7Z0I7	B7Z0I7	Dorsal + Lateral (6)	0.804675	0.810783
968			B9A0N7	B9A0N7	Dorsal + Lateral (6)	0.728616	0.836456
3449	NimC4		Q9V392	Q9V392	Dorsal + Lateral (6)	0.654094	0.654094
3663	RpS28a		Q9VAB9	Q9VAB9	Dorsal + Lateral (6)	0.675524	0.675524
520	Tctp	Translationally-controlled tumor protein homolog	A0A126GUT1;Q9VGS2	A0A126GUT1;Q9VGS2	Dorsal + Lateral (6)	0.836163	0.829757
701	GstE6		A1ZB71	A1ZB71	Dorsal + Lateral (6)	0.824377	0.798139
645			A1Z9I0	A1Z9I0	Dorsal + Lateral (6)	0.641196	0.711202
279	ema		A0A0B4KH88;Q9VEV4;Q5BIH5	A0A0B4KH88;Q9VEV4;Q5BIH5	Dorsal + Lateral (6)	0.737111	0.829659
328	Nlp	Nucleoplasmin-like protein	A0A0B4KI24;Q27415	A0A0B4KI24;Q27415	Dorsal + Lateral (6)	0.820768	0.816295
475	awd	Nucleoside diphosphate kinase	A0A0B4LJ12;A0A0B4LHX6;P08879	A0A0B4LJ12;A0A0B4LHX6;P08879	Dorsal + Lateral (6)	0.840338	0.821349
981	Ef1alpha48D-RA;Ef1alpha48D	Elongation factor 1-alpha;Elongation factor 1-alpha 1	C6TP87;P08736	C6TP87;P08736	Dorsal + Lateral (6)	0.847236	0.832353
388	grh	Protein grainyhead	A0A0B4LFT7;P13002;A0A0B4K7F6	A0A0B4LFT7;P13002	Dorsal + Lateral (6)	0.698542	0.788266
318	CG11539	N-acetyltransferase 9-like protein	A0A0B4KHX9;Q9V9V9	A0A0B4KHX9;Q9V9V9	Dorsal + Lateral (6)	0.72777	0.829
167	Alh		Q9VI61;A0A0B4KF76;Q8INT1;A0A0B4KFQ4;E1JJ75;E1JJ76;A8JQU7;Q7KSZ0;A0A0B4KFD2;Q9VI63;A0A0B4KGB4;A8JQU6;A0A0B4KGP1	Q9VI61;A0A0B4KF76;Q8INT1;A0A0B4KFQ4;E1JJ75;E1JJ76;A8JQU7;Q7KSZ0;A0A0B4KFD2;Q9VI63;A0A0B4KGB4;A8JQU6;A0A0B4KGP1	Dorsal + Lateral (6)	0.783672	0.779142
3414	Fmr1	Fragile X mental retardation syndrome-related protein 1	Q9NFU0;B3LF78	Q9NFU0;B3LF78	Dorsal + Lateral (6)	0.801283	0.767289
3394			Q9I7M5	Q9I7M5	Dorsal + Lateral (6)	0.675633	0.787879
2087	tsg	Protein twisted gastrulation	P54356	P54356	Dorsal + Lateral (6)	0.710544	0.743769
1872	w	Protein white	P10090	P10090	Dorsal + Lateral (6)	0.759304	0.668638
1622			M9PJ04;Q2PE29;M9PGL8;Q7KVX6	M9PJ04;Q2PE29;M9PGL8;Q7KVX6	Dorsal + Lateral (6)	0.80579	0.770506
1187	sdt		Q9W3H6;Q7KVT3;X2JCZ1;M9PJD0;E2QD98;Q6NR03;Q0KHU9;X2JIZ6;Q9W3H8;Q9W3H7;M9NG38;M9NEZ2	Q9W3H6;Q7KVT3;X2JCZ1;M9PJD0;E2QD98;Q6NR03;Q0KHU9;X2JIZ6;Q9W3H8;Q9W3H7;M9NG38;M9NEZ2	Dorsal + Lateral (6)	0.793192	0.714764
3501	heix	UbiA prenyltransferase domain-containing protein 1 homolog	Q9V3R8	Q9V3R8	Dorsal + Lateral (6)	0.800791	0.77517
5412			Q9VVS3	Q9VVS3	Dorsal + Lateral (6)	0.780578	0.769054
423	lov	Protein jim lovell	A0A0B4LGK1;P14083	A0A0B4LGK1;P14083	Dorsal + Lateral (6)	0.676779	0.676779
1439	Duox	Dual oxidase	M9PCF1;Q9VQH2	M9PCF1;Q9VQH2	Dorsal + Ventral Tl10B (7)	0.77168	NaN
1242			M9MRG2	M9MRG2	Dorsal + Ventral Tl10B (7)	0.645026	NaN
3120	egr		Q8MUJ1	Q8MUJ1	Dorsal + Ventral Tl10B (7)	0.66458	NaN
1868	zen	Protein zerknuellt 1	P09089	P09089	Dorsal + Ventral Tl10B (7)	0.695552	NaN
2938	CG42726-RA		Q8INE2	Q8INE2	Dorsal + Ventral Tl10B (7)	0.681693	NaN
68	MED31	Mediator of RNA polymerase II transcription subunit 31	A0A0B4K6R3;Q8IH24	A0A0B4K6R3;Q8IH24	Dorsal + Ventral Tl10B (7)	0.718845	NaN
5978	babos		Q9W258	Q9W258	Dorsal + Ventral Tl10B (7)	0.632368	NaN
1116	sfl	Bifunctional heparan sulfate N-deacetylase/N-sulfotransferase;Heparan sulfate N-deacetylase;Heparan sulfate N-sulfotransferase	E1JID8;Q9V3L1	E1JID8;Q9V3L1	Dorsal + Ventral Tl10B (7)	0.574878	NaN
5808	CG1317-RB		Q9W023	Q9W023	Dorsal + Ventral Tl10B (7)	0.613163	NaN
684	Gbp		A1ZAQ9	A1ZAQ9	Dorsal + Ventral Tl10B (7)	0.538263	NaN
1153	rdgB	Protein retinal degeneration B	E1JJK9;E1JJK7;X2JF93;P43125;E1JJK8;E1JJK6;M9PJM8;M9PEJ5	E1JJK9;E1JJK7;X2JF93;P43125;E1JJK8;E1JJK6;M9PJM8;M9PEJ5	Dorsal + Ventral Tl10B (7)	0.745845	NaN
2514			Q7JY99	Q7JY99	Dorsal + Ventral Tl10B (7)	0.7576	NaN
2536			Q7JZY1	Q7JZY1	Dorsal + Ventral Tl10B (7)	0.789688	NaN
2760	NimB2		Q7KTA1	Q7KTA1	Dorsal + Ventral Tl10B (7)	0.763906	NaN
4673	CG8372-RB		Q9VLR4;Q8IPG2	Q9VLR4;Q8IPG2	Dorsal + Ventral Tl10B (7)	0.782808	NaN
4907	net		Q9VPI8	Q9VPI8	Dorsal + Ventral Tl10B (7)	0.739158	NaN
4961			Q9VQ75	Q9VQ75	Dorsal + Ventral Tl10B (7)	0.77417	NaN
5519	psh	Serine protease persephone	Q9VWU1	Q9VWU1	Dorsal + Ventral Tl10B (7)	0.596683	NaN
5706	p24-1		Q9VYT6	Q9VYT6	Dorsal + Ventral Tl10B (7)	0.77762	NaN
1084	AttB;AttA	Attacin-B;Attacin-A	E1JH67;Q9V751;P45884	E1JH67;Q9V751;P45884	Dorsal + Ventral Tl10B (7)	0.743037	NaN
5683	CG12717-RA		Q9VYJ5	Q9VYJ5	Dorsal + Ventral Tl10B (7)	0.735775	NaN
5174			Q9VST8	Q9VST8	Dorsal + Ventral Tl10B (7)	0.795348	NaN
2504			Q7JXE1	Q7JXE1	Dorsal + Ventral Tl10B (7)	0.774696	NaN
6250	EG:115C2.8		Q9W5E2	Q9W5E2	Dorsal + Ventral Tl10B (7)	0.810525	NaN
6206	VhaAC39-1	V-type proton ATPase subunit d 1	Q9W4P5	Q9W4P5	Dorsal + Ventral Tl10B (7)	0.78879	NaN
6150	CG15896-RA		Q9W413	Q9W413	Dorsal + Ventral Tl10B (7)	0.817214	NaN
6126			Q9W3V3	Q9W3V3	Dorsal + Ventral Tl10B (7)	0.858949	NaN
6110	Dok		Q9W3R6	Q9W3R6	Dorsal + Ventral Tl10B (7)	0.777541	NaN
6036	Ser7		Q9W314	Q9W314	Dorsal + Ventral Tl10B (7)	0.824065	NaN
6285	Vha100-1	V-type proton ATPase subunit a	Q9XZ10;Q8IML5	Q9XZ10;Q8IML5	Dorsal + Ventral Tl10B (7)	0.82714	NaN
5940	Rrp4		Q9W1M9	Q9W1M9	Dorsal + Ventral Tl10B (7)	0.848489	NaN
5920			Q9W1F5	Q9W1F5	Dorsal + Ventral Tl10B (7)	0.799643	NaN
5841	Ptp61F	Tyrosine-protein phosphatase non-receptor type 61F;Protein-tyrosine-phosphatase	Q9W0G1;Q8IRH4	Q9W0G1;Q8IRH4	Dorsal + Ventral Tl10B (7)	0.832186	NaN
5827			Q9W0B2;A0A0S0WGR0	Q9W0B2;A0A0S0WGR0	Dorsal + Ventral Tl10B (7)	0.809516	NaN
5799	CG9977-RA	Adenosylhomocysteinase	Q9VZX9;Q7KSG0;P50245	Q9VZX9	Dorsal + Ventral Tl10B (7)	0.830195	NaN
5743	feo		Q9VZ62	Q9VZ62	Dorsal + Ventral Tl10B (7)	0.821817	NaN
5702			Q9VYT1	Q9VYT1	Dorsal + Ventral Tl10B (7)	0.867348	NaN
5686	Tomosyn		Q9VYK6;A4V4D2;Q9VYK5	Q9VYK6;A4V4D2;Q9VYK5	Dorsal + Ventral Tl10B (7)	0.791999	NaN
5681	CG3775-RA		Q9VYJ1	Q9VYJ1	Dorsal + Ventral Tl10B (7)	0.780638	NaN
5635	ND-B18		Q9VXZ0	Q9VXZ0	Dorsal + Ventral Tl10B (7)	0.861547	NaN
5581			Q9VXH4	Q9VXH4	Dorsal + Ventral Tl10B (7)	0.781158	NaN
5490	mRpS14		Q9VWI3	Q9VWI3	Dorsal + Ventral Tl10B (7)	0.815931	NaN
5362	Syx8		Q9VV76	Q9VV76	Dorsal + Ventral Tl10B (7)	0.823949	NaN
5334	CG15715-RA		Q9VUU8;Q9VUU7	Q9VUU8;Q9VUU7	Dorsal + Ventral Tl10B (7)	0.787179	NaN
5325	UFSP2	Probable Ufm1-specific protease 2	Q9VUR0	Q9VUR0	Dorsal + Ventral Tl10B (7)	0.79983	NaN
5258	CG32104-RB		Q9VTX1	Q9VTX1	Dorsal + Ventral Tl10B (7)	0.807411	NaN
5229	rt	Protein O-mannosyltransferase 1	Q9VTK2	Q9VTK2	Dorsal + Ventral Tl10B (7)	0.697108	NaN
5198			Q9VT29	Q9VT29	Dorsal + Ventral Tl10B (7)	0.821842	NaN
5151	exo70	Exocyst complex component 7	Q9VSJ8	Q9VSJ8	Dorsal + Ventral Tl10B (7)	0.817732	NaN
5115			Q9VS44	Q9VS44	Dorsal + Ventral Tl10B (7)	0.821485	NaN
5077	membrin	Probable Golgi SNAP receptor complex member 2	Q9VRL2	Q9VRL2	Dorsal + Ventral Tl10B (7)	0.826551	NaN
5028			Q9VR05	Q9VR05	Dorsal + Ventral Tl10B (7)	0.822954	NaN
5006	PIF1	ATP-dependent DNA helicase PIF1	Q9VQR3;REV__A1Z7X7	Q9VQR3	Dorsal + Ventral Tl10B (7)	0.84666	NaN
4916	Rpp30		Q9VPM0	Q9VPM0	Dorsal + Ventral Tl10B (7)	0.802518	NaN
4865	VhaM9.7-b		Q9VP18	Q9VP18	Dorsal + Ventral Tl10B (7)	0.831147	NaN
4780	CG12581-RA		Q9VMY3	Q9VMY3	Dorsal + Ventral Tl10B (7)	0.83874	NaN
4724	Ent2		Q9VMB6	Q9VMB6	Dorsal + Ventral Tl10B (7)	0.812163	NaN
4697	Tep2		Q9VLY9;Q8IPH5;Q8IPH4;Q9VLZ0	Q9VLY9;Q8IPH5;Q8IPH4;Q9VLZ0	Dorsal + Ventral Tl10B (7)	0.773346	NaN
4549	CG42486-RA		Q9VKE7	Q9VKE7	Dorsal + Ventral Tl10B (7)	0.7712	NaN
4499	loqs		X2J5X6;Q9VJY9;X2JAB1;Q8IP72	X2J5X6;Q9VJY9;X2JAB1;Q8IP72	Dorsal + Ventral Tl10B (7)	0.81576	NaN
4492	DNApol-gamma35		Q9VJV8	Q9VJV8	Dorsal + Ventral Tl10B (7)	0.848251	NaN
4426	fon		Q9VIX7;Q8INW9	Q9VIX7;Q8INW9	Dorsal + Ventral Tl10B (7)	0.822464	NaN
4421	Rab9		Q9VIW6	Q9VIW6	Dorsal + Ventral Tl10B (7)	0.790432	NaN
4388	CG9319-RA		Q9VIK0	Q9VIK0	Dorsal + Ventral Tl10B (7)	0.824953	NaN
4385			X2J9A5;Q9VII9	X2J9A5;Q9VII9	Dorsal + Ventral Tl10B (7)	0.85896	NaN
4214	SdhC		Q9VGS3	Q9VGS3	Dorsal + Ventral Tl10B (7)	0.863914	NaN
4184			Q9VGF3	Q9VGF3	Dorsal + Ventral Tl10B (7)	0.770685	NaN
3971	CG11447	rRNA methyltransferase 2, mitochondrial	Q9VDT6	Q9VDT6	Dorsal + Ventral Tl10B (7)	0.812934	NaN
3927	AP-2sigma		Q9VDC3	Q9VDC3	Dorsal + Ventral Tl10B (7)	0.782394	NaN
3831			Q9VC65	Q9VC65	Dorsal + Ventral Tl10B (7)	0.796692	NaN
3746	CG5880-RA	Palmitoyltransferase	Q9VB73	Q9VB73	Dorsal + Ventral Tl10B (7)	0.769522	NaN
3690	CG2006-RA		Q9VAL1	Q9VAL1	Dorsal + Ventral Tl10B (7)	0.809933	NaN
3651	Npc2h		Q9VA41;Q8IMH5	Q9VA41;Q8IMH5	Dorsal + Ventral Tl10B (7)	0.817985	NaN
3603	pcs	SH3 domain-binding protein 5 homolog	Q9V785	Q9V785	Dorsal + Ventral Tl10B (7)	0.676709	NaN
3486	Rab5		Q9V3I2	Q9V3I2	Dorsal + Ventral Tl10B (7)	0.856308	NaN
3471	Tsp66E	Tetraspanin	Q9V3E5	Q9V3E5	Dorsal + Ventral Tl10B (7)	0.819405	NaN
3380	mus205	DNA polymerase	Q9GSR1	Q9GSR1	Dorsal + Ventral Tl10B (7)	0.825226	NaN
3353			Q960W0	Q960W0	Dorsal + Ventral Tl10B (7)	0.800456	NaN
3335	alpha-Est5		Q95U30	Q95U30	Dorsal + Ventral Tl10B (7)	0.855791	NaN
3304	Atox1		Q95RR1;M9PD88	Q95RR1;M9PD88	Dorsal + Ventral Tl10B (7)	0.816103	NaN
3135			Q8SWS2;X2JEY3;Q9VYM7	Q8SWS2;X2JEY3;Q9VYM7	Dorsal + Ventral Tl10B (7)	0.848638	NaN
3089	pgant9	Putative polypeptide N-acetylgalactosaminyltransferase 9	Q8MRC9	Q8MRC9	Dorsal + Ventral Tl10B (7)	0.804542	NaN
3004	Nrx-IV	Neurexin-4	Q8IQH0;Q94887	Q8IQH0;Q94887	Dorsal + Ventral Tl10B (7)	0.807448	NaN
3003	Mocs1	' Molybdenum cofactor biosynthesis protein 1;Cyclic pyranopterin monophosphate synthase;Cyclic pyranopterin monophosphate synth...' <Preview truncated at 128 characters>	Q8IQF1	Q8IQF1	Dorsal + Ventral Tl10B (7)	0.825007	NaN
3000			Q8IQC6	Q8IQC6	Dorsal + Ventral Tl10B (7)	0.827264	NaN
2960	BG:DS00797.2		Q8IP67;Q9V3D1;X2JAD3	Q8IP67;Q9V3D1;X2JAD3	Dorsal + Ventral Tl10B (7)	0.83021	NaN
2943			Q8ING0	Q8ING0	Dorsal + Ventral Tl10B (7)	0.848004	NaN
2933	Tim22	Mitochondrial import inner membrane translocase subunit Tim22	Q8IN78	Q8IN78	Dorsal + Ventral Tl10B (7)	0.828077	NaN
2908	Vha100-1	V-type proton ATPase subunit a	Q8IML3;Q8IML4;Q6NLA3	Q8IML3;Q8IML4;Q6NLA3	Dorsal + Ventral Tl10B (7)	0.824644	NaN
2880			Q86NX3	Q86NX3	Dorsal + Ventral Tl10B (7)	0.816318	NaN
2863	p24-2;eca	Transmembrane emp24 domain-containing protein eca	Q86BA5;Q9I7K5	Q86BA5;Q9I7K5	Dorsal + Ventral Tl10B (7)	0.798801	NaN
2836	p120ctn		Q7PLI0	Q7PLI0	Dorsal + Ventral Tl10B (7)	0.83743	NaN
2825	CG17896	Probable methylmalonate-semialdehyde dehydrogenase [acylating], mitochondrial	Q7KW39	Q7KW39	Dorsal + Ventral Tl10B (7)	0.881677	NaN
2807	oxt	Xylosyltransferase oxt	Q7KVA1	Q7KVA1	Dorsal + Ventral Tl10B (7)	0.811613	NaN
2772	tkv	Receptor protein serine/threonine kinase	Q95SI0;Q8IPK9;Q7KTP1;Q9VMT1	Q95SI0;Q8IPK9;Q7KTP1;Q9VMT1	Dorsal + Ventral Tl10B (7)	0.793363	NaN
2736			Q961V3;Q7KRU0;A0A0B4KHW7	Q961V3;Q7KRU0;A0A0B4KHW7	Dorsal + Ventral Tl10B (7)	0.8353	NaN
2716	fat-spondin		Q7KN04	Q7KN04	Dorsal + Ventral Tl10B (7)	0.822231	NaN
2527	Dip3		Q7JZD5	Q7JZD5	Dorsal + Ventral Tl10B (7)	0.790013	NaN
2432	Snx16		Q7JR96	Q7JR96	Dorsal + Ventral Tl10B (7)	0.814987	NaN
2426	VhaAC45		Q7JR49	Q7JR49	Dorsal + Ventral Tl10B (7)	0.866269	NaN
2280	Mer	Moesin/ezrin/radixin homolog 2	X2JFU0;Q24564	X2JFU0;Q24564	Dorsal + Ventral Tl10B (7)	0.798982	NaN
2158			Q0E8E7	Q0E8E7	Dorsal + Ventral Tl10B (7)	0.852984	NaN
2156	CG32158-RE		Q0E8E1;Q9I7R2	Q0E8E1;Q9I7R2	Dorsal + Ventral Tl10B (7)	0.746432	NaN
2062	Taf5	Transcription initiation factor TFIID subunit 5	P49846	P49846	Dorsal + Ventral Tl10B (7)	0.808297	NaN
1608	Fas2	Fasciclin-2	M9PGF6;X2JCI0;M9PJ19;X2JAF4;P34082	M9PGF6;X2JCI0;M9PJ19;X2JAF4;P34082	Dorsal + Ventral Tl10B (7)	0.842288	NaN
1587	CG6479-RA;CG6479-RB		M9PFY2;Q9VVF4;Q8IQQ8	M9PFY2;Q9VVF4;Q8IQQ8	Dorsal + Ventral Tl10B (7)	0.847078	NaN
1558			M9PHQ1;M9PFD0;Q9VRG4	M9PHQ1;M9PFD0;Q9VRG4	Dorsal + Ventral Tl10B (7)	0.817348	NaN
1554	RasGAP1	GTPase-activating protein	M9PF62;P48423	M9PF62;P48423	Dorsal + Ventral Tl10B (7)	0.818482	NaN
1391	CG12084	Protein zer-1 homolog	M9PBH9;Q9W0E8	M9PBH9;Q9W0E8	Dorsal + Ventral Tl10B (7)	0.820319	NaN
1374	Ndae1	Anion exchange protein	M9PB60;M9PCT2;Q9VM32;M9PF01;M9PCF0;M9PC92;Q9VM31;M9PC95;M9PB59;Q8IPI3	M9PB60;M9PCT2;Q9VM32;M9PF01;M9PCF0;M9PC92;Q9VM31;M9PC95;M9PB59;Q8IPI3	Dorsal + Ventral Tl10B (7)	0.805912	NaN
1357	CycA	G2/mitotic-specific cyclin-A	M9NFR3;P14785	M9NFR3;P14785	Dorsal + Ventral Tl10B (7)	0.833046	NaN
1339	amx	TM2 domain-containing protein almondex	M9NF00;Q9U4H5	M9NF00;Q9U4H5	Dorsal + Ventral Tl10B (7)	0.806514	NaN
1335	CG9336-RA		M9NEV7;Q9VII1	M9NEV7;Q9VII1	Dorsal + Ventral Tl10B (7)	0.841366	NaN
1289	Chd1	Chromodomain-helicase-DNA-binding protein 1	M9ND16;Q7KU24;M9PEB2	M9ND16;Q7KU24;M9PEB2	Dorsal + Ventral Tl10B (7)	0.819483	NaN
1211	CG9154-RA;CG9154	Protein-lysine N-methyltransferase CG9154	H0RNC9;Q9VMH7	H0RNC9;Q9VMH7	Dorsal + Ventral Tl10B (7)	0.841685	NaN
1179	CG7705-RA		E2QCZ3;E2QCZ4	E2QCZ3	Dorsal + Ventral Tl10B (7)	0.826137	NaN
1151	APC4		E1JJG4;Q9W395	E1JJG4;Q9W395	Dorsal + Ventral Tl10B (7)	0.803942	NaN
1082	Den1		Q7JUX2;E1JH43	Q7JUX2;E1JH43	Dorsal + Ventral Tl10B (7)	0.836737	NaN
1052	mfas-RJ;mfas		D3DMM4;Q86B97;Q9VGE9;Q86B96;Q86B95;Q9VGF0;Q86B94	D3DMM4;Q86B97;Q9VGE9;Q86B96;Q86B95;Q9VGF0;Q86B94	Dorsal + Ventral Tl10B (7)	0.80336	NaN
825			L0MLL1;Q8IMA6;Q7KQN3;A8DZ26;Q8IMA3;Q8IMA5;Q8IMA7;Q8SXV3	L0MLL1;Q8IMA6;Q7KQN3;A8DZ26	Dorsal + Ventral Tl10B (7)	0.85001	NaN
758	Aef1	Adult enhancer factor 1	A4V287;M9PG42;P39413	A4V287;M9PG42;P39413	Dorsal + Ventral Tl10B (7)	0.862606	NaN
747	CycE	G1/S-specific cyclin-E	A4V0R4;M9NDQ2;P54733	A4V0R4;M9NDQ2;P54733	Dorsal + Ventral Tl10B (7)	0.820595	NaN
662	CG33506-RA		A1Z9W2	A1Z9W2	Dorsal + Ventral Tl10B (7)	0.800163	NaN
601			A1Z830;A1Z831	A1Z830;A1Z831	Dorsal + Ventral Tl10B (7)	0.873491	NaN
523			Q9VEZ6;A0A126GUV0	Q9VEZ6;A0A126GUV0	Dorsal + Ventral Tl10B (7)	0.745496	NaN
405	l(2)k09913		A0A0B4LG95;Q7K274;A0A0B4LGC6;Q8MLS7	A0A0B4LG95;Q7K274;A0A0B4LGC6;Q8MLS7	Dorsal + Ventral Tl10B (7)	0.849098	NaN
191	CG11755	Cysteine-rich DPF motif domain-containing protein 1	A0A0B4KFI0;Q9VHN3	A0A0B4KFI0;Q9VHN3	Dorsal + Ventral Tl10B (7)	0.755919	NaN
160	Topors	E3 ubiquitin-protein ligase Topors	A0A0B4KEZ9;Q9V8P9	A0A0B4KEZ9;Q9V8P9	Dorsal + Ventral Tl10B (7)	0.814599	NaN
111	Glycogenin		A0A0B4K7X5;A0A0B4LFW5;Q9W2J6;A0A0B4LG72;A0A0B4LG29;E1JGQ3	A0A0B4K7X5;A0A0B4LFW5;Q9W2J6;A0A0B4LG72;A0A0B4LG29;E1JGQ3	Dorsal + Ventral Tl10B (7)	0.810131	NaN
29	CG6136	Copper homeostasis protein cutC homolog	A0A0B4JDE8;Q9VF71	A0A0B4JDE8;Q9VF71	Dorsal + Ventral Tl10B (7)	0.805286	NaN
364	seq		A0A0B4LFA2;A1Z995	A0A0B4LFA2;A1Z995	Dorsal + Ventral Tl10B (7)	0.582298	NaN
4675	SLC5A11		Q9VLR8	Q9VLR8	Dorsal + Ventral Tl10B (7)	0.704731	NaN
843	Nc73EF		A8JNU6	A8JNU6	Dorsal + Ventral Tl10B (7)	0.848011	NaN
7	Lap1	Protein lap1	A0A0B4JCT8;Q9V780	A0A0B4JCT8;Q9V780	Dorsal + Ventral Tl10B (7)	0.820271	NaN
3022			Q8IQZ4	Q8IQZ4	Dorsal + Ventral Tl10B (7)	0.824726	NaN
52			Q9VGD1;A0A0B4K6G0	Q9VGD1;A0A0B4K6G0	Dorsal + Ventral spn27A (8)	NaN	0.598164
5455			Q9VW68	Q9VW68	Dorsal + Ventral spn27A (8)	NaN	0.797336
4356			Q9VI65	Q9VI65	Dorsal + Ventral spn27A (8)	NaN	0.770921
754	bol	Protein boule	A4V1Q1;A4V1Q0;M9PF25;Q24207;Q6NN06	A4V1Q1;A4V1Q0;M9PF25;Q24207;Q6NN06	Dorsal + Ventral spn27A (8)	NaN	0.794329
900			B7YZJ4	B7YZJ4	Dorsal + Ventral spn27A (8)	NaN	0.809828
2435	Jheh1		Q7JRC3	Q7JRC3	Dorsal + Ventral spn27A (8)	NaN	0.77777
2822	l(1)G0045		Q7KVW2	Q7KVW2	Dorsal + Ventral spn27A (8)	NaN	0.806719
2944	CG32473-RB		Q8INH5	Q8INH5	Dorsal + Ventral spn27A (8)	NaN	0.648148
3562	CG11077	Mpv17-like protein	Q9V492	Q9V492	Dorsal + Ventral spn27A (8)	NaN	0.696106
4238			Q9VH18	Q9VH18	Dorsal + Ventral spn27A (8)	NaN	0.676596
4265	CG16790	U6 snRNA phosphodiesterase	Q9VHB3	Q9VHB3	Dorsal + Ventral spn27A (8)	NaN	0.825313
96	l(2)k14710		A0A0B4K7H0;Q7KN74	A0A0B4K7H0;Q7KN74	Dorsal + Ventral spn27A (8)	NaN	0.803522
133			A0A0B4KEN1;A1Z7N4;A0A0B4KEF7;A0A0B4LEX2	A0A0B4KEN1;A1Z7N4;A0A0B4KEF7;A0A0B4LEX2	Dorsal + Ventral spn27A (8)	NaN	0.82791
162	Ppa;ppa		Q9W214;A0A0B4KF28	Q9W214;A0A0B4KF28	Dorsal + Ventral spn27A (8)	NaN	0.786089
218	f-cup		Q7KSK8;Q9V3X1;A0A0B4KFW1;A0A0B4KG03;A8JQZ7;A0A0B4KGK9;A8JQZ8;Q6NLJ7	Q7KSK8;Q9V3X1;A0A0B4KFW1;A0A0B4KG03;A8JQZ7;A0A0B4KGK9	Dorsal + Ventral spn27A (8)	NaN	0.819572
334	CG1969-RB;CG1969	Probable glucosamine 6-phosphate N-acetyltransferase	Q8IMK5;C6TP98;A0A0B4KI57;A0A0B4K7R2;Q9VAI0	Q8IMK5;C6TP98;A0A0B4KI57;A0A0B4K7R2;Q9VAI0	Dorsal + Ventral spn27A (8)	NaN	0.83186
424	Zasp52	PDZ and LIM domain protein Zasp	A0A0B4LGL0;A1ZA47;A0A126GUN6;A0A0B4KEW3;C1C3E7;G3JX29;G3JX30;G3JX27;G3JX28;A0A0B4KFR8;A0A0B4KER6;G3JX25;G3JX31;G3JX32;G3JX33	A0A0B4LGL0;A1ZA47;A0A126GUN6;A0A0B4KEW3;C1C3E7;G3JX29;G3JX30;G3JX27;G3JX28;A0A0B4KFR8;A0A0B4KER6;G3JX25;G3JX31;G3JX32	Dorsal + Ventral spn27A (8)	NaN	0.734454
521	Not10	CCR4-NOT transcription complex subunit 10	A0A126GUU0;Q9V3G6	A0A126GUU0;Q9V3G6	Dorsal + Ventral spn27A (8)	NaN	0.856003
608	CG7220-RB		Q8T972;A1Z8B5	Q8T972;A1Z8B5	Dorsal + Ventral spn27A (8)	NaN	0.799151
664	Pms2		A1ZA03	A1ZA03	Dorsal + Ventral spn27A (8)	NaN	0.852586
683	CG9646-RA		A1ZAP1;A0A0B4LFQ7	A1ZAP1;A0A0B4LFQ7	Dorsal + Ventral spn27A (8)	NaN	0.854753
704	CG12263-RA		A1ZB84;REV__A1ZB84	A1ZB84	Dorsal + Ventral spn27A (8)	NaN	0.806966
735	CG4495	Calcium uptake protein 1 homolog, mitochondrial	A2VEI2	A2VEI2	Dorsal + Ventral spn27A (8)	NaN	0.84128
739	GstS1	Glutathione S-transferase S1	A4UZL5;P41043	A4UZL5;P41043	Dorsal + Ventral spn27A (8)	NaN	0.827378
939	Idh	Isocitrate dehydrogenase [NADP]	B7Z0E0;Q8IQA7;Q9VSI6;Q7KUB0	B7Z0E0;Q8IQA7;Q9VSI6;Q7KUB0	Dorsal + Ventral spn27A (8)	NaN	0.832263
979	RpS9	40S ribosomal protein S9	C6SUW3;P55935;Q95RG1	C6SUW3;P55935;Q95RG1	Dorsal + Ventral spn27A (8)	NaN	0.875093
1055	ssh	Protein phosphatase Slingshot	D3PFH9;E1JIW2;Q6NN85	D3PFH9;E1JIW2;Q6NN85	Dorsal + Ventral spn27A (8)	NaN	0.822715
1224	Arl4		Q9V4B2;H9XVM3;L0MN60	Q9V4B2;H9XVM3	Dorsal + Ventral spn27A (8)	NaN	0.610517
1234	CG40228	Transcription elongation factor 1 homolog	L7ED64;L7EEF9;Q8MQI6	L7ED64;L7EEF9;Q8MQI6	Dorsal + Ventral spn27A (8)	NaN	0.836052
1244	RluA-2		M9MRH0;Q9VKU8;M9PFI9;Q9VKV0	M9MRH0;Q9VKU8	Dorsal + Ventral spn27A (8)	NaN	0.843089
1347	qua	Villin-like protein quail	M9NF69;Q23989	M9NF69;Q23989	Dorsal + Ventral spn27A (8)	NaN	0.818981
1394	pgant6	Polypeptide N-acetylgalactosaminyltransferase;N-acetylgalactosaminyltransferase 6	M9PBK1;Q6WV16	M9PBK1;Q6WV16	Dorsal + Ventral spn27A (8)	NaN	0.802144
1450	CG3887	SelT-like protein	M9PCL4;Q9VMV6	M9PCL4;Q9VMV6	Dorsal + Ventral spn27A (8)	NaN	0.789664
1479	Ac78C		M9PG27;M9PD54;Q9VP76;M9PID8;M9NG95	M9PG27;M9PD54;Q9VP76;M9PID8;M9NG95	Dorsal + Ventral spn27A (8)	NaN	0.793282
1494	cad	Homeotic protein caudal	M9PDI3;P09085	M9PDI3;P09085	Dorsal + Ventral spn27A (8)	NaN	0.851396
1501	cta	Guanine nucleotide-binding protein subunit alpha homolog	M9PDM5;P25157	M9PDM5;P25157	Dorsal + Ventral spn27A (8)	NaN	0.81078
1544	Atg18a		M9PEY7;M9PER1;M9PHS3;Q9VSF0	M9PEY7;M9PER1;M9PHS3;Q9VSF0	Dorsal + Ventral spn27A (8)	NaN	0.875584
1562	tral		M9PFF9;M9PFG3	M9PFF9;M9PFG3	Dorsal + Ventral spn27A (8)	NaN	0.608
1586	wek	Zinc finger protein weckle	M9PFY1;Q9VJN5	M9PFY1;Q9VJN5	Dorsal + Ventral spn27A (8)	NaN	0.838593
1693	Rab10		O15971	O15971	Dorsal + Ventral spn27A (8)	NaN	0.83799
1703	Rab1		O18332	O18332	Dorsal + Ventral spn27A (8)	NaN	0.851858
1719	scb	Integrin alpha-PS3;Integrin alpha-PS3 heavy chain;Integrin alpha-PS3 light chain	O44386	O44386	Dorsal + Ventral spn27A (8)	NaN	0.534999
1728	kz	Probable ATP-dependent RNA helicase kurz	X2JCE0;O46072	X2JCE0;O46072	Dorsal + Ventral spn27A (8)	NaN	0.826217
1748	Flo-1	Flotillin-1	O61491	O61491	Dorsal + Ventral spn27A (8)	NaN	0.811042
1779	crm	Protein cramped	O76906	O76906	Dorsal + Ventral spn27A (8)	NaN	0.825135
1866	Ras85D	Ras-like protein 1	P08646	P08646	Dorsal + Ventral spn27A (8)	NaN	0.848308
1902	Pka-C3	Protein kinase DC2	P16912	P16912	Dorsal + Ventral spn27A (8)	NaN	0.813588
2022	RpL18A	60S ribosomal protein L18a	P41093	P41093	Dorsal + Ventral spn27A (8)	NaN	0.848426
2122	smo	Protein smoothened	P91682	P91682	Dorsal + Ventral spn27A (8)	NaN	0.789514
2228	dx	Protein deltex	Q23985	Q23985	Dorsal + Ventral spn27A (8)	NaN	0.850664
2312			Q32KD3;Q7KSW1;Q494I1;A0A0B4KGS8;Q9VHW9;A0A0B4KGF6	Q32KD3;Q7KSW1;Q494I1;A0A0B4KGS8;Q9VHW9;A0A0B4KGF6	Dorsal + Ventral spn27A (8)	NaN	0.83861
2339	Atg10		Q4V6A8	Q4V6A8	Dorsal + Ventral spn27A (8)	NaN	0.711504
2392			Q6NLJ9	Q6NLJ9	Dorsal + Ventral spn27A (8)	NaN	0.816961
2402			Q6NR22	Q6NR22	Dorsal + Ventral spn27A (8)	NaN	0.814027
2481	CG1598	ATPase ASNA1 homolog	Q7JWD3	Q7JWD3	Dorsal + Ventral spn27A (8)	NaN	0.837959
2492			Q7JWU9	Q7JWU9	Dorsal + Ventral spn27A (8)	NaN	0.853058
2563	OstDelta		Q7K110	Q7K110	Dorsal + Ventral spn27A (8)	NaN	0.84571
2581			Q7K1M4	Q7K1M4	Dorsal + Ventral spn27A (8)	NaN	0.811856
2664	mlt		Q7K549	Q7K549	Dorsal + Ventral spn27A (8)	NaN	0.875983
2667	Bmcp		Q7K566	Q7K566	Dorsal + Ventral spn27A (8)	NaN	0.8063
2701	Dark		Q7KLI1;Q9U8R4	Q7KLI1;Q9U8R4	Dorsal + Ventral spn27A (8)	NaN	0.839984
2846	LpR2		Q7YU01;A8JRC4;A8JRC7;A0A0B4KH38;Q9VBN2;Q7YTZ6;Q86B77;A0A0B4KGZ9;Q6NN57	Q7YU01;A8JRC4;A8JRC7;A0A0B4KH38;Q9VBN2;Q7YTZ6;Q86B77;A0A0B4KGZ9	Dorsal + Ventral spn27A (8)	NaN	0.801539
2887	SNF4Agamma		Q8I0A1	Q8I0A1	Dorsal + Ventral spn27A (8)	NaN	0.687372
3030			Q9VYT2;Q8IR85	Q9VYT2;Q8IR85	Dorsal + Ventral spn27A (8)	NaN	0.805225
3037	Strip		Q9VZQ9;Q8IRD5	Q9VZQ9;Q8IRD5	Dorsal + Ventral spn27A (8)	NaN	0.880276
3073			Q8MLW4	Q8MLW4	Dorsal + Ventral spn27A (8)	NaN	0.844268
3092	CG8135	LMBR1 domain-containing protein 2 homolog	Q8MRQ4	Q8MRQ4	Dorsal + Ventral spn27A (8)	NaN	0.851532
3179	PIP4K		Q8SXX1	Q8SXX1	Dorsal + Ventral spn27A (8)	NaN	0.849797
3213			Q8SZB7	Q8SZB7	Dorsal + Ventral spn27A (8)	NaN	0.834977
3338	Mms19		Q95U54	Q95U54	Dorsal + Ventral spn27A (8)	NaN	0.819322
3467	Idgf2	Chitinase-like protein Idgf2	Q9V3D4;D4G7B1	Q9V3D4;D4G7B1	Dorsal + Ventral spn27A (8)	NaN	0.8417
3493	htt		Q9V3N4	Q9V3N4	Dorsal + Ventral spn27A (8)	NaN	0.825171
3508	EG:103E12.3		Q9V3U1;M9PGK1	Q9V3U1;M9PGK1	Dorsal + Ventral spn27A (8)	NaN	0.850117
3582	tsu	RNA-binding protein 8A	Q9V535	Q9V535	Dorsal + Ventral spn27A (8)	NaN	0.873545
3658	Bet5		Q9VA95	Q9VA95	Dorsal + Ventral spn27A (8)	NaN	0.831847
3693	CG1458	CDGSH iron-sulfur domain-containing protein 2 homolog	Q9VAM6	Q9VAM6	Dorsal + Ventral spn27A (8)	NaN	0.81313
3742	l(3)mbt		Q9VB52	Q9VB52	Dorsal + Ventral spn27A (8)	NaN	0.83611
3788	Nup37		Q9VBU8	Q9VBU8	Dorsal + Ventral spn27A (8)	NaN	0.847918
3859	AP-1sigma		Q9VCF4	Q9VCF4	Dorsal + Ventral spn27A (8)	NaN	0.8437
3928	CG3337-RA		Q9VDC8	Q9VDC8	Dorsal + Ventral spn27A (8)	NaN	0.810048
4056	Der-2		Q9VEU2	Q9VEU2	Dorsal + Ventral spn27A (8)	NaN	0.850587
4071	Rbf2		Q9VF04	Q9VF04	Dorsal + Ventral spn27A (8)	NaN	0.824362
4096	l(3)neo43		Q9VF98	Q9VF98	Dorsal + Ventral spn27A (8)	NaN	0.786433
4150	yellow-f2		Q9VG08	Q9VG08	Dorsal + Ventral spn27A (8)	NaN	0.815742
4203		D-tyrosyl-tRNA(Tyr) deacylase	Q9VGP0	Q9VGP0	Dorsal + Ventral spn27A (8)	NaN	0.704147
4211			Q9VGR0	Q9VGR0	Dorsal + Ventral spn27A (8)	NaN	0.823692
4264			Q9VHB1;A0A0B4KFZ7;Q9VHB2	Q9VHB1;A0A0B4KFZ7	Dorsal + Ventral spn27A (8)	NaN	0.852886
4307	CG8202	UPF0505 protein CG8202	Q9VHM2	Q9VHM2	Dorsal + Ventral spn27A (8)	NaN	0.826978
4368	l(2)k14505		Q9VID7	Q9VID7	Dorsal + Ventral spn27A (8)	NaN	0.829793
4383	Mtp		Q9VIH3	Q9VIH3	Dorsal + Ventral spn27A (8)	NaN	0.824021
4443	Nak		Q9VJ30;Q7KT38;X2J946	Q9VJ30;Q7KT38;X2J946	Dorsal + Ventral spn27A (8)	NaN	0.829994
4579			Q9VKQ7	Q9VKQ7	Dorsal + Ventral spn27A (8)	NaN	0.803727
4626	CG4592-RA		Q9VL66	Q9VL66	Dorsal + Ventral spn27A (8)	NaN	0.735205
4686	RpL36A		Q9VLT7	Q9VLT7	Dorsal + Ventral spn27A (8)	NaN	0.807405
4734	Arpc4		Q9VMH2	Q9VMH2	Dorsal + Ventral spn27A (8)	NaN	0.82222
4777	Scox		Q9VMX4	Q9VMX4	Dorsal + Ventral spn27A (8)	NaN	0.873921
4786			Q9VN18	Q9VN18	Dorsal + Ventral spn27A (8)	NaN	0.587534
4820	RpL13A	60S ribosomal protein L13a	Q9VNE9;A0A0B4KFM7	Q9VNE9	Dorsal + Ventral spn27A (8)	NaN	0.870494
4845			Q9VNR7;A8E6R2	Q9VNR7;A8E6R2	Dorsal + Ventral spn27A (8)	NaN	0.723773
4883			Q9VPA9	Q9VPA9	Dorsal + Ventral spn27A (8)	NaN	0.812504
4951			Q9VQ27	Q9VQ27	Dorsal + Ventral spn27A (8)	NaN	0.831654
4958			Q9VQ60	Q9VQ60	Dorsal + Ventral spn27A (8)	NaN	0.799127
5085	Txl		Q9VRP3	Q9VRP3	Dorsal + Ventral spn27A (8)	NaN	0.85674
5129	CG7457-RA;CG7457	Tonsoku-like protein	T2GGE0;Q9VSA4	T2GGE0;Q9VSA4	Dorsal + Ventral spn27A (8)	NaN	0.789195
5157	GstO3		Q9VSL2	Q9VSL2	Dorsal + Ventral spn27A (8)	NaN	0.654964
5203	Cdk8	Cyclin-dependent kinase 8	Q9VT57	Q9VT57	Dorsal + Ventral spn27A (8)	NaN	0.797894
5254			Q9VTV4	Q9VTV4	Dorsal + Ventral spn27A (8)	NaN	0.83417
5280	SRm160		Q9VU43	Q9VU43	Dorsal + Ventral spn27A (8)	NaN	0.829292
5297	ptip		Q9VUB7	Q9VUB7	Dorsal + Ventral spn27A (8)	NaN	0.787517
5353			Q9VV49	Q9VV49	Dorsal + Ventral spn27A (8)	NaN	0.792685
5436	CG9231	UPF0389 protein CG9231	X2JGV8;Q9VW12	X2JGV8;Q9VW12	Dorsal + Ventral spn27A (8)	NaN	0.797139
5513	CG6659	C-mannosyltransferase dpy-19 homolog	Q9VWR8	Q9VWR8	Dorsal + Ventral spn27A (8)	NaN	0.83469
5577	mei-41	Serine/threonine-protein kinase ATR	Q9VXG8	Q9VXG8	Dorsal + Ventral spn27A (8)	NaN	0.830258
5688	Aven		Q9VYK8	Q9VYK8	Dorsal + Ventral spn27A (8)	NaN	0.783197
5802	CG16986-RA		Q9VZZ5	Q9VZZ5	Dorsal + Ventral spn27A (8)	NaN	0.81888
5836			Q9W0D8	Q9W0D8	Dorsal + Ventral spn27A (8)	NaN	0.579979
5917	or		Q9W1E8	Q9W1E8	Dorsal + Ventral spn27A (8)	NaN	0.792387
6020			Q9W2P5	Q9W2P5	Dorsal + Ventral spn27A (8)	NaN	0.813561
6117	CG4593-RA		Q9W3T2	Q9W3T2	Dorsal + Ventral spn27A (8)	NaN	0.87283
6269	ox	Cytochrome b-c1 complex subunit 9	Q9XY35	Q9XY35	Dorsal + Ventral spn27A (8)	NaN	0.839414
1059	Hydr2	Abhydrolase domain-containing protein 2	D5AEM9;M9NDD5;Q24093	D5AEM9;M9NDD5;Q24093	Dorsal + Ventral spn27A (8)	NaN	0.70685
3102			Q8MSE4	Q8MSE4	Dorsal + Ventral spn27A (8)	NaN	0.810639
2489	Swim		Q7JWQ7	Q7JWQ7	Dorsal + Ventral spn27A (8)	NaN	0.838757
6536			X2JAM4;X2JG79;Q7KV92;M9PEC5;Q0E8J1;M9MRP8;M9NFH6;M9MRN5;M9MRZ4;M9NEY0;M9MRQ1	X2JAM4;X2JG79;Q7KV92;M9PEC5;Q0E8J1	Dorsal + Ventral spn27A (8)	NaN	0.837424
6176			Q9W4C2	Q9W4C2	Dorsal + Ventral spn27A (8)	NaN	0.781721
6093			Q9W3K3	Q9W3K3	Dorsal + Ventral spn27A (8)	NaN	0.858781
5944	CG3520-RA		Q9W1Q5	Q9W1Q5	Dorsal + Ventral spn27A (8)	NaN	0.787526
5895	CG3570	Probable methyltransferase BTM2 homolog	Q9W138	Q9W138	Dorsal + Ventral spn27A (8)	NaN	0.833844
5817	mv		Q9W060	Q9W060	Dorsal + Ventral spn27A (8)	NaN	0.814231
5769			Q9VZJ4	Q9VZJ4	Dorsal + Ventral spn27A (8)	NaN	0.764863
5620	mh		Q9VXU6	Q9VXU6	Dorsal + Ventral spn27A (8)	NaN	0.760074
5564	Sap30	Histone deacetylase complex subunit SAP30 homolog	X2JKS9;Q9VXB3	X2JKS9;Q9VXB3	Dorsal + Ventral spn27A (8)	NaN	0.806052
5469	parvin		Q9VWD0	Q9VWD0	Dorsal + Ventral spn27A (8)	NaN	0.878184
5435			Q9VW10	Q9VW10	Dorsal + Ventral spn27A (8)	NaN	0.850447
5343	Taspase1		Q9VUX9	Q9VUX9	Dorsal + Ventral spn27A (8)	NaN	0.833336
5283	CG10171-RB		Q9VU64;Q8IQJ7	Q9VU64;Q8IQJ7	Dorsal + Ventral spn27A (8)	NaN	0.828789
5271			Q9VU08	Q9VU08	Dorsal + Ventral spn27A (8)	NaN	0.767744
5249	Atg12	Autophagy protein 12-like	Q9VTU1	Q9VTU1	Dorsal + Ventral spn27A (8)	NaN	0.82318
5181			Q9VSX7	Q9VSX7	Dorsal + Ventral spn27A (8)	NaN	0.694616
5150		NADPH-dependent diflavin oxidoreductase 1	Q9VSJ5	Q9VSJ5	Dorsal + Ventral spn27A (8)	NaN	0.826767
5109			Q9VRZ7	Q9VRZ7	Dorsal + Ventral spn27A (8)	NaN	0.828871
5056	Cyp6v1	Probable cytochrome P450 6v1	X2JGA6;Q9VRB3	X2JGA6;Q9VRB3	Dorsal + Ventral spn27A (8)	NaN	0.827148
4952	RFeSP	Cytochrome b-c1 complex subunit Rieske, mitochondrial	Q9VQ29	Q9VQ29	Dorsal + Ventral spn27A (8)	NaN	0.828046
4891			Q9VPC3	Q9VPC3	Dorsal + Ventral spn27A (8)	NaN	0.681067
4867	Mkrn1		Q9VP20	Q9VP20	Dorsal + Ventral spn27A (8)	NaN	0.831136
4843	SPoCk	Calcium-transporting ATPase	Q9VNR2;C1C5A0;Q8IPS6;A8JNX2;M9PG15	Q9VNR2;C1C5A0;Q8IPS6;A8JNX2;M9PG15	Dorsal + Ventral spn27A (8)	NaN	0.84103
4805	CG1161	Uncharacterized protein CG1161	Q9VNA4;Q59E06	Q9VNA4;Q59E06	Dorsal + Ventral spn27A (8)	NaN	0.836667
4778	Marcal1	SWI/SNF-related matrix-associated actin-dependent regulator of chromatin subfamily A-like protein 1	Q9VMX6	Q9VMX6	Dorsal + Ventral spn27A (8)	NaN	0.883887
4772	CG8891	Inosine triphosphate pyrophosphatase	Q9VMW7	Q9VMW7	Dorsal + Ventral spn27A (8)	NaN	0.828168
4706	Nuf2		Q9VM45	Q9VM45	Dorsal + Ventral spn27A (8)	NaN	0.81333
4646	Trs23		Q9VLI9	Q9VLI9	Dorsal + Ventral spn27A (8)	NaN	0.787268
4625	CG31712	UPF0430 protein CG31712	Q9VL63;M9PB85	Q9VL63;M9PB85	Dorsal + Ventral spn27A (8)	NaN	0.835671
4522		Protein YIPF	Q9VK46	Q9VK46	Dorsal + Ventral spn27A (8)	NaN	0.809824
4392	bru	Protein brunelleschi	Q9VIL0	Q9VIL0	Dorsal + Ventral spn27A (8)	NaN	0.822671
4371	Atg18b		Q9VIE1	Q9VIE1	Dorsal + Ventral spn27A (8)	NaN	0.717276
4349	Zif		Q9VI24	Q9VI24	Dorsal + Ventral spn27A (8)	NaN	0.84278
4281			Q9VHF6;Q8T0L6	Q9VHF6;Q8T0L6	Dorsal + Ventral spn27A (8)	NaN	0.778308
4259	nmdyn-D7		Q9VH94	Q9VH94	Dorsal + Ventral spn27A (8)	NaN	0.819963
4204	CG5270	Zinc finger FYVE domain-containing protein 26 homolog	Q9VGP1	Q9VGP1	Dorsal + Ventral spn27A (8)	NaN	0.776339
4166	CG5196-RA	Palmitoyltransferase	Q9VG80;Q8SWX8	Q9VG80;Q8SWX8	Dorsal + Ventral spn27A (8)	NaN	0.830585
4126	rdx	Protein roadkill	Q9VFP2	Q9VFP2	Dorsal + Ventral spn27A (8)	NaN	0.829501
4088	ldlCp	Conserved oligomeric Golgi complex subunit 2	Q9VF78	Q9VF78	Dorsal + Ventral spn27A (8)	NaN	0.830128
4065			Q9VEY4	Q9VEY4	Dorsal + Ventral spn27A (8)	NaN	0.83423
4006	Vps39		Q9VEA2	Q9VEA2	Dorsal + Ventral spn27A (8)	NaN	0.822797
3923	CG6353	Protein archease-like	Q9VD92	Q9VD92	Dorsal + Ventral spn27A (8)	NaN	0.794326
3809	beta4GalT7		Q9VBZ9	Q9VBZ9	Dorsal + Ventral spn27A (8)	NaN	0.8087
3782			Q9VBR9	Q9VBR9	Dorsal + Ventral spn27A (8)	NaN	0.820906
3698	CG11882-RA		Q9VAN8	Q9VAN8	Dorsal + Ventral spn27A (8)	NaN	0.850088
3674	Vps16B		Q9VAG4	Q9VAG4	Dorsal + Ventral spn27A (8)	NaN	0.80066
3638			Q9V9W4	Q9V9W4	Dorsal + Ventral spn27A (8)	NaN	0.7796
3520	Seipin	Seipin	Q9V3X4	Q9V3X4	Dorsal + Ventral spn27A (8)	NaN	0.849185
3498	Jafrac2		Q9V3Q4	Q9V3Q4	Dorsal + Ventral spn27A (8)	NaN	0.844317
3481	Drep4		Q9V3H0	Q9V3H0	Dorsal + Ventral spn27A (8)	NaN	0.775994
3431	grau	Transcription factor grauzone	Q9U405	Q9U405	Dorsal + Ventral spn27A (8)	NaN	0.856466
3235	ltd		Q8T0G8	Q8T0G8	Dorsal + Ventral spn27A (8)	NaN	0.846625
3191	Ttc19	Tetratricopeptide repeat protein 19 homolog, mitochondrial	Q8SYD0	Q8SYD0	Dorsal + Ventral spn27A (8)	NaN	0.819124
3124	Fancd2		Q8MYL1	Q8MYL1	Dorsal + Ventral spn27A (8)	NaN	0.788422
3083	CG7231-RD		Q8MQP2;Q9VLU9	Q8MQP2;Q9VLU9	Dorsal + Ventral spn27A (8)	NaN	0.794595
3050	Sirt4	NAD-dependent protein deacetylase Sirt4	Q8IRR5	Q8IRR5	Dorsal + Ventral spn27A (8)	NaN	0.833015
3034			Q8IRD1	Q8IRD1	Dorsal + Ventral spn27A (8)	NaN	0.81144
3014	Nc73EF		Q8IQQ0	Q8IQQ0	Dorsal + Ventral spn27A (8)	NaN	0.832962
2851			Q7YZ99;Q9W0B0;A8JNI2;Q86BP9;X2J8K5	Q7YZ99;Q9W0B0;A8JNI2	Dorsal + Ventral spn27A (8)	NaN	0.804207
2831	Spf45		Q7PL82	Q7PL82	Dorsal + Ventral spn27A (8)	NaN	0.862372
2696	sut1		Q7KK97	Q7KK97	Dorsal + Ventral spn27A (8)	NaN	0.84304
2666			Q7K561	Q7K561	Dorsal + Ventral spn27A (8)	NaN	0.73769
2612	Trs31		Q7K2Q8	Q7K2Q8	Dorsal + Ventral spn27A (8)	NaN	0.811628
2572	ste24a		Q7K172	Q7K172	Dorsal + Ventral spn27A (8)	NaN	0.817015
2558			Q7K0W1	Q7K0W1	Dorsal + Ventral spn27A (8)	NaN	0.811356
2490			Q7JWR4	Q7JWR4	Dorsal + Ventral spn27A (8)	NaN	0.822965
2449			Q7JUM3	Q7JUM3	Dorsal + Ventral spn27A (8)	NaN	0.721313
2394	Ntmt	Alpha N-terminal protein methyltransferase 1	Q6NN40	Q6NN40	Dorsal + Ventral spn27A (8)	NaN	0.814345
2367			Q5LJQ3	Q5LJQ3	Dorsal + Ventral spn27A (8)	NaN	0.808326
2330			Q4V429	Q4V429	Dorsal + Ventral spn27A (8)	NaN	0.767062
2236	dally	Division abnormally delayed protein	Q53XG2;Q24114	Q53XG2;Q24114	Dorsal + Ventral spn27A (8)	NaN	0.71462
2221	nrv2	Sodium/potassium-transporting ATPase subunit beta-2	Q1RL12;A4V0B5;Q24048	Q1RL12;A4V0B5;Q24048	Dorsal + Ventral spn27A (8)	NaN	0.793505
2042	Fdh	Alcohol dehydrogenase class-3	P46415	P46415	Dorsal + Ventral spn27A (8)	NaN	0.811967
1906	Dhfr	Dihydrofolate reductase	P17719	P17719	Dorsal + Ventral spn27A (8)	NaN	0.819663
1869	RpL4	60S ribosomal protein L4	P09180	P09180	Dorsal + Ventral spn27A (8)	NaN	0.874383
1780	crm		O76912	O76912	Dorsal + Ventral spn27A (8)	NaN	0.80282
1767	Rab7		O76742	O76742	Dorsal + Ventral spn27A (8)	NaN	0.840592
1733	CG14803	Protein MMS22-like	O46089;X2JA69	O46089;X2JA69	Dorsal + Ventral spn27A (8)	NaN	0.796517
1727	EG:25E8.1		O46067	O46067	Dorsal + Ventral spn27A (8)	NaN	0.840093
1705	Rab6	Ras-related protein Rab6	X2J5T3;O18334	X2J5T3;O18334	Dorsal + Ventral spn27A (8)	NaN	0.823343
1698	RpL3	60S ribosomal protein L3	O16797	O16797	Dorsal + Ventral spn27A (8)	NaN	0.877557
1651			Q9VXE7;M9PHS8	Q9VXE7;M9PHS8	Dorsal + Ventral spn27A (8)	NaN	0.835566
1578	CG3634	Protein ST7 homolog	M9PFT2;Q9VPB1	M9PFT2;Q9VPB1	Dorsal + Ventral spn27A (8)	NaN	0.848289
1560	RpL13	60S ribosomal protein L13	M9PFF0;P41126	M9PFF0;P41126	Dorsal + Ventral spn27A (8)	NaN	0.863969
1527			M9PEJ2	M9PEJ2	Dorsal + Ventral spn27A (8)	NaN	0.867046
1496	cni	Protein cornichon	M9PDJ6;P49858	M9PDJ6;P49858	Dorsal + Ventral spn27A (8)	NaN	0.82303
1480	stc	Protein shuttle craft	M9PDG3;M9PD57;P40798	M9PDG3;M9PD57;P40798	Dorsal + Ventral spn27A (8)	NaN	0.827036
1466	Deaf1	Deformed epidermal autoregulatory factor 1	Q86LC7;M9PD02;Q24180;M9PFP9;E8NH34	Q86LC7;M9PD02;Q24180;M9PFP9;E8NH34	Dorsal + Ventral spn27A (8)	NaN	0.80255
1432	Rack1	Guanine nucleotide-binding protein subunit beta-like protein	M9PCC1;O18640;M9PB67	M9PCC1;O18640	Dorsal + Ventral spn27A (8)	NaN	0.881909
1367			Q9VQ83;M9PB06	Q9VQ83;M9PB06	Dorsal + Ventral spn27A (8)	NaN	0.851869
1257	R	Ras-like protein 3	M9MRT6;P08645	M9MRT6;P08645	Dorsal + Ventral spn27A (8)	NaN	0.833429
1235	Dbp80		Q5LK13;L7EEU0;L7EFC0;Q5LK12	Q5LK13;L7EEU0;L7EFC0;Q5LK12	Dorsal + Ventral spn27A (8)	NaN	0.572214
1233	Cals	Calsyntenin-1	X2J9E8;L0MQ08;Q9V498	X2J9E8;L0MQ08;Q9V498	Dorsal + Ventral spn27A (8)	NaN	0.808308
1124			Q7KSI9;E1JIL1	Q7KSI9;E1JIL1	Dorsal + Ventral spn27A (8)	NaN	0.817125
1045	CaMKII		D1YSG8	D1YSG8	Dorsal + Ventral spn27A (8)	NaN	0.869296
964	C3G	Guanine nucleotide-releasing factor 2	B7Z131;B7Z132;X2JIR4;M9PJ95;B7Z129;M9PGJ9;B7Z130;O77086	B7Z131;B7Z132;X2JIR4;M9PJ95;B7Z129;M9PGJ9;B7Z130;O77086	Dorsal + Ventral spn27A (8)	NaN	0.78992
890	CG4040-RA;CG42388-RF;CG42388-RC		B5RJS0;X2JAX8;D5SHR1;M9MQH0;H1UUM2	B5RJS0;X2JAX8;D5SHR1;M9MQH0;H1UUM2	Dorsal + Ventral spn27A (8)	NaN	0.806178
736			A2VEK1	A2VEK1	Dorsal + Ventral spn27A (8)	NaN	0.746444
709	CG15099	Protein dopey-1 homolog	A1ZBE8	A1ZBE8	Dorsal + Ventral spn27A (8)	NaN	0.831546
698	MED9	Mediator of RNA polymerase II transcription subunit 9	A1ZB42	A1ZB42	Dorsal + Ventral spn27A (8)	NaN	0.836078
682	Ehbp1		A1ZAN2;A4UZL2;B7YZI1;A4UZL3	A1ZAN2;A4UZL2;B7YZI1;A4UZL3	Dorsal + Ventral spn27A (8)	NaN	0.841016
647			A1Z9I6	A1Z9I6	Dorsal + Ventral spn27A (8)	NaN	0.819867
572	Mlh1		A1Z7C1;A0A0B4KEM3	A1Z7C1;A0A0B4KEM3	Dorsal + Ventral spn27A (8)	NaN	0.857128
425	CG3376-RA	Sphingomyelin phosphodiesterase	Q8MLP3;A0A0B4LGL2;Q9W188;D6W4U0	Q8MLP3;A0A0B4LGL2;Q9W188;D6W4U0	Dorsal + Ventral spn27A (8)	NaN	0.799824
339		Palmitoyltransferase	A0A0B4LF00;A1Z833;A0A0B4LEL6;A0A0B4LF16;Q7K2V5;A0A0B4KF56;E2QCN5	A0A0B4LF00;A1Z833;A0A0B4LEL6;A0A0B4LF16;Q7K2V5;A0A0B4KF56;E2QCN5	Dorsal + Ventral spn27A (8)	NaN	0.843879
329	LpR1		A0A0B4KI25;E1JIX9;Q6NP71;Q9VBN0;A8JRD0;A8JRD1;A0A0B4KHW9;A8JRD2;Q9VBN1	A0A0B4KI25;E1JIX9;Q6NP71;Q9VBN0;A8JRD0;A8JRD1;A0A0B4KHW9;A8JRD2;Q9VBN1	Dorsal + Ventral spn27A (8)	NaN	0.632578
207			A0A0B4KFS3;Q8T4A5	A0A0B4KFS3;Q8T4A5	Dorsal + Ventral spn27A (8)	NaN	0.785296
143	CG18812-RA;CG18812-RB;CG18812	Protein GDAP2 homolog	A1Z742;A0A0B4KEL9;A1Z741;D1Z396;A0A0B4KFB9;Q7JUR6	A1Z742;A0A0B4KEL9;A1Z741;D1Z396;A0A0B4KFB9;Q7JUR6	Dorsal + Ventral spn27A (8)	NaN	0.805728
104	Spase22-23	Signal peptidase complex subunit 3	A0A0B4K7R1;Q9VCA9	A0A0B4K7R1;Q9VCA9	Dorsal + Ventral spn27A (8)	NaN	0.854651
35	Fmr1		A0A0B4K618	A0A0B4K618	Dorsal + Ventral spn27A (8)	NaN	0.855421
229	plx		A0A0B4KG76;Q9VNG9;Q8IPP5;A0A0B4KGK7;E1JJ52	A0A0B4KG76;Q9VNG9;Q8IPP5;A0A0B4KGK7;E1JJ52	Dorsal + Ventral spn27A (8)	NaN	0.827723
389	stmA	Protein EFR3 homolog cmp44E	A0A0B4LFU5;Q8IGJ0	A0A0B4LFU5;Q8IGJ0	Dorsal + Ventral spn27A (8)	NaN	0.818822
504			Q9VTT4;A0A0S0WNE9	Q9VTT4;A0A0S0WNE9	Dorsal + Ventral spn27A (8)	NaN	0.731623
1155	LIMK1	LIM domain kinase 1	E1JJM7;Q8IR79;E1JJM8	E1JJM7;Q8IR79;E1JJM8	Dorsal + Ventral spn27A (8)	NaN	0.803447
1495			M9PDI7;Q8IRW6;M9PIQ9	M9PDI7;Q8IRW6;M9PIQ9	Dorsal + Ventral spn27A (8)	NaN	0.830812
1631	comt	Vesicle-fusing ATPase 1	M9PH10;P46461	M9PH10;P46461	Dorsal + Ventral spn27A (8)	NaN	0.800225
2862	CG14732		Q9VGG3;Q86B99;Q86B98	Q9VGG3;Q86B99;Q86B98	Dorsal + Ventral spn27A (8)	NaN	0.794447
3146			Q8SX24	Q8SX24	Dorsal + Ventral spn27A (8)	NaN	0.739047
3613	Obp56a	General odorant-binding protein 56a	Q9V8Y2	Q9V8Y2	Dorsal + Ventral spn27A (8)	NaN	0.758584
3911			Q9VD22	Q9VD22	Dorsal + Ventral spn27A (8)	NaN	0.767626
4588	LManII	Alpha-mannosidase	Q9VKV1	Q9VKV1	Dorsal + Ventral spn27A (8)	NaN	0.818061
4699	RapGAP1		Q9VM00	Q9VM00	Dorsal + Ventral spn27A (8)	NaN	0.828545
5027			Q9VR04	Q9VR04	Dorsal + Ventral spn27A (8)	NaN	0.7981
5779	CG12012-RA		Q9VZP9	Q9VZP9	Dorsal + Ventral spn27A (8)	NaN	0.814854
5961	stl		Q9W1Z6	Q9W1Z6	Dorsal + Ventral spn27A (8)	NaN	0.750969
3057			Q8MKJ9	Q8MKJ9	Dorsal + Ventral spn27A (8)	NaN	0.81033
5744			Q9VZ63	Q9VZ63	Dorsal + Ventral spn27A (8)	NaN	0.770622
6226			Q9W513	Q9W513	Dorsal + Ventral spn27A (8)	NaN	0.83809
5824	Gk		Q9W095	Q9W095	Dorsal + Ventral spn27A (8)	NaN	0.80242
5402			Q9VVM1	Q9VVM1	Dorsal + Ventral spn27A (8)	NaN	0.821844
4732	frj		Q9VMD5	Q9VMD5	Dorsal + Ventral spn27A (8)	NaN	0.802693
4698	Cyp4d21	Probable cytochrome P450 4d21	Q9VLZ7	Q9VLZ7	Dorsal + Ventral spn27A (8)	NaN	0.768697
4341			Q9VHX6	Q9VHX6	Dorsal + Ventral spn27A (8)	NaN	0.745553
3845	mRpS24	28S ribosomal protein S24, mitochondrial	Q9VCC3	Q9VCC3	Dorsal + Ventral spn27A (8)	NaN	0.814424
3584	l(2)k10201	Protein lethal(2)k10201	Q9V574	Q9V574	Dorsal + Ventral spn27A (8)	NaN	0.820484
2996	pst		Q8IQ82;Q8IQ80	Q8IQ82;Q8IQ80	Dorsal + Ventral spn27A (8)	NaN	0.70454
2450			Q7JUN3	Q7JUN3	Dorsal + Ventral spn27A (8)	NaN	0.761602
1566			Q9VVJ0;M9PFK5	Q9VVJ0;M9PFK5	Dorsal + Ventral spn27A (8)	NaN	0.800793
1430	Vm26Aa	Vitelline membrane protein Vm26Aa	M9PCA1;P11449	M9PCA1;P11449	Dorsal + Ventral spn27A (8)	NaN	0.686567
531			A0A1L4AAD6	A0A1L4AAD6	Dorsal + Ventral spn27A (8)	NaN	0.800131
429	Hcs		Q9VNC3;A0A0B4LGM5;A0A0B4KF92;A0A0B4LGS6	Q9VNC3;A0A0B4LGM5;A0A0B4KF92;A0A0B4LGS6	Dorsal + Ventral spn27A (8)	NaN	0.80302
387	Cyp4e2	Cytochrome P450 4e2	A0A0B4LFT2;Q27606;Q9V4T5	A0A0B4LFT2;Q27606	Dorsal + Ventral spn27A (8)	NaN	0.740883
169	CG12895	Succinate dehydrogenase assembly factor 2, mitochondrial;Succinate dehydrogenase assembly factor 2-B, mitochondrial	A0A0B4KF96;A1Z897	A0A0B4KF96;A1Z897	Dorsal + Ventral spn27A (8)	NaN	0.797383
700	GstE3		A1ZB68	A1ZB68	Dorsal + Ventral spn27A (8)	NaN	0.789904
1336	CG43346-RA		M9NEW0	M9NEW0	Dorsal + Ventral spn27A (8)	NaN	0.803598
2150	htl	Fibroblast growth factor receptor homolog 1	Q07407	Q07407	Dorsal + Ventral spn27A (8)	NaN	0.670345
2606	dmpd		Q7K2J4	Q7K2J4	Dorsal + Ventral spn27A (8)	NaN	0.651868
5578			Q9VXG9	Q9VXG9	Dorsal + Ventral spn27A (8)	NaN	0.785912
5510			Q9VWQ3	Q9VWQ3	Dorsal + Ventral spn27A (8)	NaN	0.482454
2956	Socs36E		Q9VJA1;Q8INY1	Q9VJA1;Q8INY1	Dorsal + Ventral spn27A (8)	NaN	0.670364
250	foxo	Forkhead box protein O	A0A126GUT4;A0A0B4KGN1;Q95V55	A0A126GUT4;A0A0B4KGN1;Q95V55	Dorsal + Ventral spn27A (8)	NaN	0.775548
5782	Drsl5		Q9VZR2	Q9VZR2	Dorsal + Ventral spn27A (8)	NaN	0.637578
5595	CG16952-RB		X2JFM8;Q9VXM6	X2JFM8;Q9VXM6	Dorsal + Ventral spn27A (8)	NaN	0.814187
4870			Q9VP36;M9PIG0	Q9VP36;M9PIG0	Dorsal + Ventral spn27A (8)	NaN	0.821719
4749	bchs		Q9VML2	Q9VML2	Dorsal + Ventral spn27A (8)	NaN	0.794616
4564			Q9VKJ8	Q9VKJ8	Dorsal + Ventral spn27A (8)	NaN	0.81434
4361			Q9VI83	Q9VI83	Dorsal + Ventral spn27A (8)	NaN	0.609755
3339	mkg-p		Q95U58	Q95U58	Dorsal + Ventral spn27A (8)	NaN	0.611401
3178			Q8SXX0	Q8SXX0	Dorsal + Ventral spn27A (8)	NaN	0.829939
651	RN-tre		A1Z9K4;Q7KQC4;A0A0B4JD18;Q95RE0;A0A0B4KEQ5	A1Z9K4;Q7KQC4;A0A0B4JD18;Q95RE0;A0A0B4KEQ5	Dorsal + Ventral spn27A (8)	NaN	0.742133
5302	Pex1		Q9VUC7	Q9VUC7	Dorsal + Ventral spn27A (8)	NaN	0.769817
5640	nmdyn-D6	Nucleoside diphosphate kinase	Q9VY27	Q9VY27	Dorsal + Ventral spn27A (8)	NaN	0.73585
5123	SMSr	Sphingomyelin synthase-related 1	Q9VS60	Q9VS60	Dorsal + Ventral spn27A (8)	NaN	0.743121
4898	CG5969	Vacuolar ATPase assembly integral membrane protein VMA21 homolog	Q9VPE4	Q9VPE4	Dorsal + Ventral spn27A (8)	NaN	0.683344
3894	Cyp6d4	Probable cytochrome P450 6d4	Q9VCW1	Q9VCW1	Dorsal + Ventral spn27A (8)	NaN	0.558402
3846			Q9VCC4	Q9VCC4	Dorsal + Ventral spn27A (8)	NaN	0.748653
3093			Q8MRT7	Q8MRT7	Dorsal + Ventral spn27A (8)	NaN	0.756215
127			A0A0B4KEH8;A0A0B4KEC2;Q9W5H8;Q5LJQ4	A0A0B4KEH8;A0A0B4KEC2;Q9W5H8;Q5LJQ4	Dorsal + Ventral spn27A (8)	NaN	0.749494
141	CG9003-RC		A8DYA5;Q5BI22;A0A0B4KEK4;A1Z8M8;A0A0B4KEU4;A8DYA6	A8DYA5;Q5BI22;A0A0B4KEK4;A1Z8M8;A0A0B4KEU4;A8DYA6	Dorsal + Ventral Tl10B spn27A (9)	0.602376	0.689144
6234	mRpL16		Q9W547	Q9W547	Dorsal + Ventral Tl10B spn27A (9)	0.816156	0.83643
5894			Q9W137	Q9W137	Dorsal + Ventral Tl10B spn27A (9)	0.776903	0.84137
153	Ipk1	Inositol-pentakisphosphate 2-kinase	A0A0B4KEV9;A8DYK1;Q9W2Q7;A0A0B4LH15	A0A0B4KEV9;A8DYK1;Q9W2Q7;A0A0B4LH15	Dorsal + Ventral Tl10B spn27A (9)	0.736954	0.76939
193	Kdm2	JmjC domain-containing histone demethylation protein 1	A0A0B4KFJ7;Q9VHH9	A0A0B4KFJ7;Q9VHH9	Dorsal + Ventral Tl10B spn27A (9)	0.785392	0.804284
383	UFSP1	Probable Ufm1-specific protease 1	A0A0B4LFP9;Q4V6M7	A0A0B4LFP9;Q4V6M7	Dorsal + Ventral Tl10B spn27A (9)	0.774172	0.838765
481	pre-mod(mdg4)-C		A0A0B4LIG1	A0A0B4LIG1	Dorsal + Ventral Tl10B spn27A (9)	0.817233	0.829401
628	ana3		A1Z8X3	A1Z8X3	Dorsal + Ventral Tl10B spn27A (9)	0.79714	0.838546
761	Ama	Protein amalgam	A4V2I0;Q7KSX2;P15364	A4V2I0;Q7KSX2;P15364	Dorsal + Ventral Tl10B spn27A (9)	0.644397	0.66614
1065	CG9662-RA;CG9662	Putative oligosaccharyltransferase complex subunit CG9662	E0R7Q5;Q9VQP9	E0R7Q5;Q9VQP9	Dorsal + Ventral Tl10B spn27A (9)	0.816656	0.847776
1736	fs(1)N		O46100;M9PDG9	O46100;M9PDG9	Dorsal + Ventral Tl10B spn27A (9)	0.797636	0.821388
2167	CG34137-RA		Q0E8M3	Q0E8M3	Dorsal + Ventral Tl10B spn27A (9)	0.826197	0.855058
2494	nec		Q7JWX3	Q7JWX3	Dorsal + Ventral Tl10B spn27A (9)	0.783192	0.828318
2636			Q7K483	Q7K483	Dorsal + Ventral Tl10B spn27A (9)	0.788283	0.814485
2762	MRP		Q7KTC4;Q7KTB7	Q7KTC4;Q7KTB7	Dorsal + Ventral Tl10B spn27A (9)	0.605132	0.691944
3007	Sap130		Q8IQH9;Q8IQI0;M9PI47;M9PCC4;Q9XZ09	Q8IQH9;Q8IQI0;M9PI47;M9PCC4;Q9XZ09	Dorsal + Ventral Tl10B spn27A (9)	0.82882	0.866123
3199	CG5147-RA		Q8SYM9	Q8SYM9	Dorsal + Ventral Tl10B spn27A (9)	0.80608	0.830968
3324	CG9798	Elongation of very long chain fatty acids protein	Q95T98	Q95T98	Dorsal + Ventral Tl10B spn27A (9)	0.81915	0.836149
3391	Cdc23		Q9I7L8;E1JHM5	Q9I7L8;E1JHM5	Dorsal + Ventral Tl10B spn27A (9)	0.81442	0.83908
3463	EG:BACR42I17.10		Q9V3C6	Q9V3C6	Dorsal + Ventral Tl10B spn27A (9)	0.799899	0.831413
3527	Sp7		Q9V3Z2	Q9V3Z2	Dorsal + Ventral Tl10B spn27A (9)	0.765882	0.818039
3872	SPE		Q9VCJ8;Q8IN70	Q9VCJ8	Dorsal + Ventral Tl10B spn27A (9)	0.795163	0.854865
4202	RpL24-like	Probable ribosome biogenesis protein RLP24	Q9VGN9	Q9VGN9	Dorsal + Ventral Tl10B spn27A (9)	0.771325	0.809361
4332			Q9VHV9	Q9VHV9	Dorsal + Ventral Tl10B spn27A (9)	0.787078	0.824389
4359	CG10055	Protein SHQ1 homolog	Q9VI74	Q9VI74	Dorsal + Ventral Tl10B spn27A (9)	0.804613	0.850843
4689	Spn28Dc		Q9VLU4	Q9VLU4	Dorsal + Ventral Tl10B spn27A (9)	0.749779	0.808405
4829			Q9VNG2	Q9VNG2	Dorsal + Ventral Tl10B spn27A (9)	0.823325	0.851733
4941	Tfb4		Q9VPX4	Q9VPX4	Dorsal + Ventral Tl10B spn27A (9)	0.789592	0.842932
5012	CG16713-RA		Q9VQT7	Q9VQT7	Dorsal + Ventral Tl10B spn27A (9)	0.792799	0.832937
5096	loj		Q9VRU2	Q9VRU2	Dorsal + Ventral Tl10B spn27A (9)	0.79439	0.842995
5140			Q9VSE8	Q9VSE8	Dorsal + Ventral Tl10B spn27A (9)	0.812088	0.835425
5560	CG9125	Decapping nuclease DXO homolog	Q9VXA8	Q9VXA8	Dorsal + Ventral Tl10B spn27A (9)	0.804975	0.83227
5591	Rrp47		Q9VXL4	Q9VXL4	Dorsal + Ventral Tl10B spn27A (9)	0.787047	0.826801
5645			Q9VY47;Q8MR65	Q9VY47	Dorsal + Ventral Tl10B spn27A (9)	0.793182	0.843835
5700	sicily	NADH dehydrogenase (ubiquinone) complex I, assembly factor 6 homolog	X2JJK8;Q9VYS5	X2JJK8;Q9VYS5	Dorsal + Ventral Tl10B spn27A (9)	0.783614	0.807941
5803			Q9VZZ6	Q9VZZ6	Dorsal + Ventral Tl10B spn27A (9)	0.817742	0.849585
5822			Q9W087;Q9VHQ9	Q9W087	Dorsal + Ventral Tl10B spn27A (9)	0.820317	0.852868
5867	Cypl	Peptidyl-prolyl cis-trans isomerase	Q9W0Q2	Q9W0Q2	Dorsal + Ventral Tl10B spn27A (9)	0.834155	0.866455
4	CG45784-RA		A0A0A1EI90	A0A0A1EI90	Dorsal + Ventral Tl10B spn27A (9)	0.681604	0.721804
5786			Q9VZS7	Q9VZS7	Dorsal + Ventral Tl10B spn27A (9)	0.862282	0.869858
5865			Q9W0P4	Q9W0P4	Dorsal + Ventral Tl10B spn27A (9)	0.852131	0.849367
5898	Start1		Q9W145;A0A0B4LGM4	Q9W145;A0A0B4LGM4	Dorsal + Ventral Tl10B spn27A (9)	0.83161	0.836304
5911	enok	Histone acetyltransferase	Q9W1A9	Q9W1A9	Dorsal + Ventral Tl10B spn27A (9)	0.849284	0.824708
5926			Q9W1H1	Q9W1H1	Dorsal + Ventral Tl10B spn27A (9)	0.864417	0.864457
5982		tRNA pseudouridine synthase	Q9W282	Q9W282	Dorsal + Ventral Tl10B spn27A (9)	0.853929	0.859348
6106			Q9W3N9	Q9W3N9	Dorsal + Ventral Tl10B spn27A (9)	0.822375	0.830469
6146			Q9W403	Q9W403	Dorsal + Ventral Tl10B spn27A (9)	0.849503	0.849917
6163			Q9W455;Q95RH3	Q9W455;Q95RH3	Dorsal + Ventral Tl10B spn27A (9)	0.697772	0.699389
6197	Femcoat		Q9W4M3	Q9W4M3	Dorsal + Ventral Tl10B spn27A (9)	0.834009	0.83675
6218	Bzd		Q9W4X8	Q9W4X8	Dorsal + Ventral Tl10B spn27A (9)	0.778763	0.812723
6235	CG14805-RA		Q9W550	Q9W550	Dorsal + Ventral Tl10B spn27A (9)	0.846979	0.857729
6249	EG:34F3.4		Q9W5D3	Q9W5D3	Dorsal + Ventral Tl10B spn27A (9)	0.827183	0.81459
6284	botv	Exostosin-3	Q9XZ08	Q9XZ08	Dorsal + Ventral Tl10B spn27A (9)	0.819253	0.828003
6310	XRCC1		Q9Y095	Q9Y095	Dorsal + Ventral Tl10B spn27A (9)	0.814394	0.824114
6333	BcDNA.GH03377		Q9Y153	Q9Y153	Dorsal + Ventral Tl10B spn27A (9)	0.825225	0.813594
6534			X2JC02;X2J8M7;X2JCG0;E1JIB9;Q7KV98;Q9W016;E1JIC0;X2JAL9;M9PDU5;M9MRU6;Q9W013;Q8IRF0	X2JC02;X2J8M7;X2JCG0;E1JIB9;Q7KV98;Q9W016;E1JIC0;X2JAL9;M9PDU5	Dorsal + Ventral Tl10B spn27A (9)	0.801333	0.818991
6343			R9PY27	R9PY27	Dorsal + Ventral Tl10B spn27A (9)	0.78341	0.809995
6311	Tim9b	Mitochondrial import inner membrane translocase subunit Tim10B	Q9Y0V3	Q9Y0V3	Dorsal + Ventral Tl10B spn27A (9)	0.814072	0.825342
6287			Q9XZ12	Q9XZ12	Dorsal + Ventral Tl10B spn27A (9)	0.79496	0.811787
6260			Q9W5W6	Q9W5W6	Dorsal + Ventral Tl10B spn27A (9)	0.833499	0.841667
6237	Vps26	Vacuolar protein sorting-associated protein 26	Q9W552	Q9W552	Dorsal + Ventral Tl10B spn27A (9)	0.867848	0.862336
6231	eIF2B-epsilon		Q9W541	Q9W541	Dorsal + Ventral Tl10B spn27A (9)	0.843484	0.839035
6201	CG6379-RB;CG6379	Cap-specific mRNA (nucleoside-2-O-)-methyltransferase 1	T2GGJ9;Q9W4N2	T2GGJ9;Q9W4N2	Dorsal + Ventral Tl10B spn27A (9)	0.750979	0.747871
6166	GAA1		Q9W464	Q9W464	Dorsal + Ventral Tl10B spn27A (9)	0.840613	0.835816
6161			Q9W448;X2JDV7	Q9W448;X2JDV7	Dorsal + Ventral Tl10B spn27A (9)	0.8261	0.808093
6124	Cht11		Q9W3V1	Q9W3V1	Dorsal + Ventral Tl10B spn27A (9)	0.775168	0.792059
6037	Lst8	Protein LST8 homolog	Q9W328	Q9W328	Dorsal + Ventral Tl10B spn27A (9)	0.829479	0.828888
5960			Q9W1Y8	Q9W1Y8	Dorsal + Ventral Tl10B spn27A (9)	0.784406	0.789287
5919	thoc5	THO complex subunit 5	Q9W1F4	Q9W1F4	Dorsal + Ventral Tl10B spn27A (9)	0.811415	0.817099
5910			Q9W1A8	Q9W1A8	Dorsal + Ventral Tl10B spn27A (9)	0.817226	0.834359
5884	Orc4		Q9W102	Q9W102	Dorsal + Ventral Tl10B spn27A (9)	0.841296	0.848626
5857			Q9W0M5	Q9W0M5	Dorsal + Ventral Tl10B spn27A (9)	0.801746	0.829612
5776	CG12006	GPI mannosyltransferase 3	Q9VZM5	Q9VZM5	Dorsal + Ventral Tl10B spn27A (9)	0.817656	0.816497
30	Ptp99A	Protein-tyrosine-phosphatase;Tyrosine-protein phosphatase 99A	A0A0B4JDF4;Q9VAL5;P35832	A0A0B4JDF4;Q9VAL5;P35832	Dorsal + Ventral Tl10B spn27A (9)	0.773594	0.757575
89	Asph		Q9GQ82;A0A0B4K7C1;A0A0B4KFS5	Q9GQ82;A0A0B4K7C1;A0A0B4KFS5	Dorsal + Ventral Tl10B spn27A (9)	0.532172	0.510715
159	Mctp		Q7JZN2;A1ZBD6;A0A126GUP9;A0A0C4DHG8;A0A0B4KEZ6	Q7JZN2;A1ZBD6;A0A126GUP9;A0A0C4DHG8;A0A0B4KEZ6	Dorsal + Ventral Tl10B spn27A (9)	0.820522	0.840357
165	Uba1		A0A0B4KF46	A0A0B4KF46	Dorsal + Ventral Tl10B spn27A (9)	0.874496	0.861959
173	shn		Q0E9C5;A1Z8F4;A0A0B4KFC0	Q0E9C5;A1Z8F4;A0A0B4KFC0	Dorsal + Ventral Tl10B spn27A (9)	0.723841	0.773798
176	Ate1	Arginyl-tRNA--protein transferase 1	A0A0B4KFD5	A0A0B4KFD5	Dorsal + Ventral Tl10B spn27A (9)	0.825365	0.804932
187			Q9W1W8;A0A0B4KFG3	Q9W1W8;A0A0B4KFG3	Dorsal + Ventral Tl10B spn27A (9)	0.769902	0.789667
231	Arp5	Actin-related protein 5	A0A0B4KG83;Q9VEC3	A0A0B4KG83;Q9VEC3	Dorsal + Ventral Tl10B spn27A (9)	0.833335	0.860419
274	Aats-met	Methionine--tRNA ligase, mitochondrial	A0A0B4KH54;Q9VFL5	A0A0B4KH54;Q9VFL5	Dorsal + Ventral Tl10B spn27A (9)	0.86381	0.85102
292	sip3	E3 ubiquitin-protein ligase HRD1	A0A0B4KHH2;Q95SP2	A0A0B4KHH2;Q95SP2	Dorsal + Ventral Tl10B spn27A (9)	0.844682	0.85469
319	Tl	Protein toll	A0A0B4KHY4;P08953	A0A0B4KHY4;P08953	Dorsal + Ventral Tl10B spn27A (9)	0.692837	0.700131
321			A0A0B4KHY8;Q9XZ32	A0A0B4KHY8;Q9XZ32	Dorsal + Ventral Tl10B spn27A (9)	0.848492	0.841096
342			A8DY62;A0A0B4LES9	A8DY62;A0A0B4LES9	Dorsal + Ventral Tl10B spn27A (9)	0.766356	0.808575
386	CG10915	Uncharacterized protein CG10915	A0A0B4LFS3;Q8SX68	A0A0B4LFS3;Q8SX68	Dorsal + Ventral Tl10B spn27A (9)	0.855794	0.86355
396	CG11007	Thioredoxin-related transmembrane protein 2 homolog	A0A0B4LFY2;Q7JW12	A0A0B4LFY2;Q7JW12	Dorsal + Ventral Tl10B spn27A (9)	0.832652	0.824439
400	CalpA	Calpain-A;Calpain-A catalytic subunit	A8DYJ3;A0A0B4LG26;Q11002;Q9VFV0	A8DYJ3;A0A0B4LG26;Q11002	Dorsal + Ventral Tl10B spn27A (9)	0.835004	0.817467
401	HmgZ	High mobility group protein Z	A0A0B4LG36;Q06943	A0A0B4LG36;Q06943	Dorsal + Ventral Tl10B spn27A (9)	0.821407	0.812273
417	Lpt		A0A0B4LGG6;Q9W1H0	A0A0B4LGG6;Q9W1H0	Dorsal + Ventral Tl10B spn27A (9)	0.835514	0.832844
418	Cyp6a22	Cytochrome P450 6a22	A0A0B4LGH5;Q9V769	A0A0B4LGH5;Q9V769	Dorsal + Ventral Tl10B spn27A (9)	0.821253	0.845648
435			A0A0B4LGS5;Q8MRA9	A0A0B4LGS5;Q8MRA9	Dorsal + Ventral Tl10B spn27A (9)	0.78821	0.814093
436	Gie	ADP-ribosylation factor-like protein 8	A0A0B4LGT4;Q9VHV5	A0A0B4LGT4;Q9VHV5	Dorsal + Ventral Tl10B spn27A (9)	0.853019	0.838091
440	Elk		A0A0B4LGW2;A1ZB14	A0A0B4LGW2;A1ZB14	Dorsal + Ventral Tl10B spn27A (9)	0.819775	0.80245
445	RpL11	60S ribosomal protein L11	A0A0B4LGZ5;P46222	A0A0B4LGZ5;P46222	Dorsal + Ventral Tl10B spn27A (9)	0.8752	0.872763
463	Muted;muted	Biogenesis of lysosome-related organelles complex 1 subunit 5	A0A0B4LHG2;Q0KI28	A0A0B4LHG2;Q0KI28	Dorsal + Ventral Tl10B spn27A (9)	0.848749	0.838474
492	Gdh	Glutamate dehydrogenase	A0A0C4DHE7	A0A0C4DHE7	Dorsal + Ventral Tl10B spn27A (9)	0.863964	0.878739
495	CG1427-RC	O-phosphoseryl-tRNA(Sec) selenium transferase	A0A0C4DHG1;Q9VNE3;A0A0B4KF37	A0A0C4DHG1;Q9VNE3	Dorsal + Ventral Tl10B spn27A (9)	0.809932	0.817069
496	Gel	Gelsolin	A0A0C4DHG2;Q07171;A0A0C4DHG6	A0A0C4DHG2;Q07171;A0A0C4DHG6	Dorsal + Ventral Tl10B spn27A (9)	0.856543	0.860568
514			A0A126GUP6	A0A126GUP6	Dorsal + Ventral Tl10B spn27A (9)	0.773095	0.801449
567	CG8726-RB		A1Z782;A1Z783;Q8MQL4	A1Z782;A1Z783;Q8MQL4	Dorsal + Ventral Tl10B spn27A (9)	0.811536	0.816839
620	rho-7		A1Z8R8	A1Z8R8	Dorsal + Ventral Tl10B spn27A (9)	0.867193	0.831116
654	CG13016-RA		A1Z9L5	A1Z9L5	Dorsal + Ventral Tl10B spn27A (9)	0.811241	0.799915
663	aPKC	Atypical protein kinase C;Protein kinase C	A1Z9X0;A0A0B4KFQ6;A0A0B4KEQ8;A0A0B4KEV2;A0A0B4JD78;A0A0B4KG15;A0A0B4JD26	A1Z9X0;A0A0B4KFQ6;A0A0B4KEQ8;A0A0B4KEV2;A0A0B4JD78;A0A0B4KG15;A0A0B4JD26	Dorsal + Ventral Tl10B spn27A (9)	0.863141	0.876296
670	CG8414	Polynucleotide 5-hydroxyl-kinase NOL9	A1ZA92	A1ZA92	Dorsal + Ventral Tl10B spn27A (9)	0.810027	0.790212
681			A1ZAM0	A1ZAM0	Dorsal + Ventral Tl10B spn27A (9)	0.748432	0.738963
692	Oxp		A1ZAW9	A1ZAW9	Dorsal + Ventral Tl10B spn27A (9)	0.833877	0.81219
724			A1ZBU8	A1ZBU8	Dorsal + Ventral Tl10B spn27A (9)	0.791235	0.818129
791	Flo2;Flo-2	Flotillin-2	A4V4F2;M9PJN2;M9PHT0;F2FB46;M9PHL7;O61492;C9QP31	A4V4F2;M9PJN2;M9PHT0;F2FB46;M9PHL7;O61492;C9QP31	Dorsal + Ventral Tl10B spn27A (9)	0.863316	0.858036
797	slgA	Proline dehydrogenase 1, mitochondrial	A4V4U5;M9NHG9;M9NFJ2;Q04499	A4V4U5;M9NHG9;M9NFJ2;Q04499	Dorsal + Ventral Tl10B spn27A (9)	0.831708	0.840132
811			A8DYT3;M9PE16;A8DYT2;Q9VQ67	A8DYT3;M9PE16;A8DYT2;Q9VQ67	Dorsal + Ventral Tl10B spn27A (9)	0.855268	0.844947
859	Vav	Protein vav	A8JUQ9;Q9NHV9;M9PHJ6	A8JUQ9;Q9NHV9;M9PHJ6	Dorsal + Ventral Tl10B spn27A (9)	0.803979	0.788262
864	boi		Q9W4Y6;A8JUV7	Q9W4Y6;A8JUV7	Dorsal + Ventral Tl10B spn27A (9)	0.754488	0.763202
876			Q7PLP4;A8Y582;Q7PLP5	Q7PLP4;A8Y582;Q7PLP5	Dorsal + Ventral Tl10B spn27A (9)	0.820644	0.833294
926	pes		B7Z031	B7Z031	Dorsal + Ventral Tl10B spn27A (9)	0.86573	0.865237
933	CG8786-RC;CG8786-RB		B7Z078;Q9VW25;B7Z083	B7Z078;Q9VW25	Dorsal + Ventral Tl10B spn27A (9)	0.843345	0.86014
1058			Q9VV51;D5AEK7;Q961F9	Q9VV51;D5AEK7;Q961F9	Dorsal + Ventral Tl10B spn27A (9)	0.829857	0.816531
1095	dl	Embryonic polarity protein dorsal	E1JHK3;C7LA93;P15330	E1JHK3;C7LA93;P15330	Dorsal + Ventral Tl10B spn27A (9)	0.852153	0.862736
1128	WRNexo;WRNexo-RB	Werner Syndrome-like exonuclease	E1JIP3;Q9VE86;E8NH59	E1JIP3;Q9VE86;E8NH59	Dorsal + Ventral Tl10B spn27A (9)	0.86507	0.84121
1131	CG7956-RA		E1JIS1;Q0KI33;Q59DV6;Q9VD98;E1JIS2	E1JIS1;Q0KI33;Q59DV6;Q9VD98;E1JIS2	Dorsal + Ventral Tl10B spn27A (9)	0.808344	0.828557
1152	CkIalpha	Casein kinase I isoform alpha	E1JJI5;P54367	E1JJI5;P54367	Dorsal + Ventral Tl10B spn27A (9)	0.854441	0.854659
1213	Rtf1-RA;Rtf1	RNA polymerase-associated protein Rtf1	H0RNK7;Q9W261	H0RNK7;Q9W261	Dorsal + Ventral Tl10B spn27A (9)	0.870008	0.862944
1222	spo	Cytochrome P450 307a1	H8F4V5;Q9VRM7	H8F4V5;Q9VRM7	Dorsal + Ventral Tl10B spn27A (9)	0.824842	0.81122
1254	Myo31DF	Myosin-IA	M9MRS7;Q23978	M9MRS7;Q23978	Dorsal + Ventral Tl10B spn27A (9)	0.803068	0.812357
1264	Nrt	Neurotactin	M9MS15;P23654	M9MS15;P23654	Dorsal + Ventral Tl10B spn27A (9)	0.851276	0.842852
1278			M9MSL0;Q9VU16	M9MSL0;Q9VU16	Dorsal + Ventral Tl10B spn27A (9)	0.798098	0.791235
1288	Rim2		M9ND06;Q9VQ37;M9NDD0	M9ND06;Q9VQ37;M9NDD0	Dorsal + Ventral Tl10B spn27A (9)	0.756294	0.790969
1331	CG5110	Ragulator complex protein LAMTOR3 homolog	M9NEQ5;Q9VJD2	M9NEQ5;Q9VJD2	Dorsal + Ventral Tl10B spn27A (9)	0.872199	0.855743
1348	Ubr1;UBR1	E3 ubiquitin-protein ligase UBR1	M9NFA7;Q9VX91	M9NFA7;Q9VX91	Dorsal + Ventral Tl10B spn27A (9)	0.851601	0.848095
1366			Q9VQ16;M9PAZ8	Q9VQ16;M9PAZ8	Dorsal + Ventral Tl10B spn27A (9)	0.853699	0.835847
1407	AIF	Putative apoptosis-inducing factor 1, mitochondrial	M9PBQ4;Q9VQ79	M9PBQ4;Q9VQ79	Dorsal + Ventral Tl10B spn27A (9)	0.866621	0.87645
1433	MED20	Mediator of RNA polymerase II transcription subunit 20	M9PCC3;P91641	M9PCC3;P91641	Dorsal + Ventral Tl10B spn27A (9)	0.848957	0.816907
1444	NHP2	H/ACA ribonucleoprotein complex subunit 2-like protein	M9PCI2;Q9V3U2	M9PCI2;Q9V3U2	Dorsal + Ventral Tl10B spn27A (9)	0.840612	0.845092
1449	CG13090	' Adenylyltransferase and sulfurtransferase MOCS3;Adenylyltransferase and sulfurtransferase MOCS3;Molybdopterin-synthase adenyl...' <Preview truncated at 128 characters>	M9PCK7;Q9VLJ8	M9PCK7;Q9VLJ8	Dorsal + Ventral Tl10B spn27A (9)	0.81746	0.848608
1452	Eip71CD	Peptide methionine sulfoxide reductase	M9PCL6;P08761;Q7KUM8;M9PI66;Q7KUN2	M9PCL6;P08761;Q7KUM8;M9PI66	Dorsal + Ventral Tl10B spn27A (9)	0.823409	0.813148
1456			M9PCP3;Q9VMK9	M9PCP3;Q9VMK9	Dorsal + Ventral Tl10B spn27A (9)	0.765072	0.739199
1460	Edem2	alpha-1,2-Mannosidase	M9PCV1;Q9VK27	M9PCV1;Q9VK27	Dorsal + Ventral Tl10B spn27A (9)	0.796664	0.827354
1488	CG2614	Methyltransferase-like protein 13	M9PDA6;Q9VIK9	M9PDA6;Q9VIK9	Dorsal + Ventral Tl10B spn27A (9)	0.879731	0.859886
1491	Adat1;adat	tRNA-specific adenosine deaminase 1	M9PDF5;Q9V3R6	M9PDF5;Q9V3R6	Dorsal + Ventral Tl10B spn27A (9)	0.790253	0.818983
1500	PI4KIIIalpha		Q9W4X4;M9PDM4	Q9W4X4;M9PDM4	Dorsal + Ventral Tl10B spn27A (9)	0.855952	0.82536
1508			M9PDX4;Q9W089	M9PDX4;Q9W089	Dorsal + Ventral Tl10B spn27A (9)	0.549165	0.508668
1521	CG3714	Nicotinate phosphoribosyltransferase	M9PEF6;Q9VQX4;M9PC31	M9PEF6;Q9VQX4;M9PC31	Dorsal + Ventral Tl10B spn27A (9)	0.806208	0.784427
1528			M9PEJ9;M9PF10;Q9VSM4	M9PEJ9;M9PF10;Q9VSM4	Dorsal + Ventral Tl10B spn27A (9)	0.813061	0.803663
1530			M9PEL5;Q9VST7	M9PEL5;Q9VST7	Dorsal + Ventral Tl10B spn27A (9)	0.840751	0.832718
1539			M9PEW1	M9PEW1	Dorsal + Ventral Tl10B spn27A (9)	0.868742	0.860738
1563	l(3)72Dn		Q9VUZ6;M9PFG1	Q9VUZ6;M9PFG1	Dorsal + Ventral Tl10B spn27A (9)	0.855346	0.865571
1606			M9PGD7;Q9W4R9	M9PGD7;Q9W4R9	Dorsal + Ventral Tl10B spn27A (9)	0.869189	0.865272
1675	RpL10	60S ribosomal protein L10	M9PIM0;O61231	M9PIM0;O61231	Dorsal + Ventral Tl10B spn27A (9)	0.856384	0.861586
1695	Chd3	Chromodomain-helicase-DNA-binding protein 3	O16102	O16102	Dorsal + Ventral Tl10B spn27A (9)	0.860989	0.860516
1707	Rab14		O18336;Q86BK8	O18336;Q86BK8	Dorsal + Ventral Tl10B spn27A (9)	0.848759	0.832932
1731	Pgam5	Serine/threonine-protein phosphatase Pgam5, mitochondrial	O46084	O46084	Dorsal + Ventral Tl10B spn27A (9)	0.851347	0.850768
1734	Ocrl		O46094	O46094	Dorsal + Ventral Tl10B spn27A (9)	0.859328	0.879952
1742	rpk		O46342;A0A0B4K691;Q9VS73	O46342;A0A0B4K691	Dorsal + Ventral Tl10B spn27A (9)	0.818942	0.818184
1754	AP-2mu		O62530	O62530	Dorsal + Ventral Tl10B spn27A (9)	0.874054	0.856838
1763	NitFhit	Nitrilase and fragile histidine triad fusion protein NitFhit;Bis(5-adenosyl)-triphosphatase;Nitrilase homolog	O76464	O76464	Dorsal + Ventral Tl10B spn27A (9)	0.822323	0.837153
1769	KdelR	ER lumen protein-retaining receptor	O76767	O76767	Dorsal + Ventral Tl10B spn27A (9)	0.818884	0.816919
1775	EG:132E8.3		O76877	O76877	Dorsal + Ventral Tl10B spn27A (9)	0.807286	0.826068
1781	aub	Protein aubergine	O76922	O76922	Dorsal + Ventral Tl10B spn27A (9)	0.844455	0.841283
1783	cm		O76928	O76928	Dorsal + Ventral Tl10B spn27A (9)	0.85148	0.867874
1789	EG:115C2.6		Q9W5E6;O77260	Q9W5E6;O77260	Dorsal + Ventral Tl10B spn27A (9)	0.872632	0.86778
1792	EG:22E5.5		O77266;Q960D4	O77266;Q960D4	Dorsal + Ventral Tl10B spn27A (9)	0.836407	0.848634
1800	JTBR		O96067	O96067	Dorsal + Ventral Tl10B spn27A (9)	0.853682	0.846181
1804	pug	' C-1-tetrahydrofolate synthase, cytoplasmic;Methylenetetrahydrofolate dehydrogenase;Methenyltetrahydrofolate cyclohydrolase;Fo...' <Preview truncated at 128 characters>	O96553;A0A0B4K623	O96553;A0A0B4K623	Dorsal + Ventral Tl10B spn27A (9)	0.842186	0.869792
1814	CDC45L		O96989	O96989	Dorsal + Ventral Tl10B spn27A (9)	0.817661	0.843668
1819	Axs	Anoctamin	O97132	O97132	Dorsal + Ventral Tl10B spn27A (9)	0.800166	0.810178
1865	Btk29A	Tyrosine-protein kinase Btk29A	P08630	P08630	Dorsal + Ventral Tl10B spn27A (9)	0.820428	0.834539
1893	Atpalpha	Sodium/potassium-transporting ATPase subunit alpha	P13607;E1JIR4;A0A0B4KGG8	P13607;E1JIR4;A0A0B4KGG8	Dorsal + Ventral Tl10B spn27A (9)	0.861517	0.860999
1930	Galphai	G protein alpha i subunit	P20353	P20353	Dorsal + Ventral Tl10B spn27A (9)	0.835819	0.839398
1948	me31B	Putative ATP-dependent RNA helicase me31b	P23128	P23128	Dorsal + Ventral Tl10B spn27A (9)	0.864986	0.852252
1949	Map205	205 kDa microtubule-associated protein	Q8IMF5;P23226	Q8IMF5;P23226	Dorsal + Ventral Tl10B spn27A (9)	0.824074	0.838282
1953	Galphaq	G protein alpha q subunit	P23625	P23625	Dorsal + Ventral Tl10B spn27A (9)	0.812934	0.841757
1962	osk	Maternal effect protein oskar	P25158;A0A126GUR4	P25158	Dorsal + Ventral Tl10B spn27A (9)	0.79248	0.802544
1974	Sos	Protein son of sevenless	P26675	P26675	Dorsal + Ventral Tl10B spn27A (9)	0.856618	0.829401
1990	RpL7	60S ribosomal protein L7	X2J5G6;P32100	X2J5G6;P32100	Dorsal + Ventral Tl10B spn27A (9)	0.870075	0.872783
1994	nullo	Protein nullo	P32845	P32845	Dorsal + Ventral Tl10B spn27A (9)	0.792858	0.800598
2020	RpS4	40S ribosomal protein S4	X2JGM9;P41042	X2JGM9;P41042	Dorsal + Ventral Tl10B spn27A (9)	0.873788	0.879915
2024	eIF-2alpha	Eukaryotic translation initiation factor 2 subunit 1	X2JFR6;P41374	X2JFR6;P41374	Dorsal + Ventral Tl10B spn27A (9)	0.873811	0.868886
2039	Arp6	Actin-related protein 6	P45890	P45890	Dorsal + Ventral Tl10B spn27A (9)	0.857425	0.846049
2040	Su(var)3-9	Histone-lysine N-methyltransferase Su(var)3-9	P45975	P45975	Dorsal + Ventral Tl10B spn27A (9)	0.828337	0.830019
2041	RpL7A	60S ribosomal protein L7a	X2JCS6;P46223	X2JCS6;P46223	Dorsal + Ventral Tl10B spn27A (9)	0.881183	0.864681
2104	eIF6	Eukaryotic translation initiation factor 6	P56538	P56538	Dorsal + Ventral Tl10B spn27A (9)	0.823742	0.830813
2113	Dyrk3	Putative dual specificity tyrosine-phosphorylation-regulated kinase 3 homolog	P83102	P83102	Dorsal + Ventral Tl10B spn27A (9)	0.806562	0.812863
2141	kel	Ring canal kelch protein;Kelch short protein	Q04652	Q04652	Dorsal + Ventral Tl10B spn27A (9)	0.804626	0.81956
2159	Mpcp		Q0E8E8	Q0E8E8	Dorsal + Ventral Tl10B spn27A (9)	0.865082	0.87341
2166	Mkp-RB	tRNA pseudouridine synthase	Q0E8K6	Q0E8K6	Dorsal + Ventral Tl10B spn27A (9)	0.803282	0.834971
2168	step		Q0E8N2;Q9V9Q6	Q0E8N2;Q9V9Q6	Dorsal + Ventral Tl10B spn27A (9)	0.721279	0.775816
2170	BG:DS00797.6		Q0E8Q6;Q8SYW8	Q0E8Q6;Q8SYW8	Dorsal + Ventral Tl10B spn27A (9)	0.726087	0.713353
2220			Q1LZ24	Q1LZ24	Dorsal + Ventral Tl10B spn27A (9)	0.838551	0.849283
2233	mei-9	DNA repair endonuclease XPF	T2FFI3;Q24087	T2FFI3;Q24087	Dorsal + Ventral Tl10B spn27A (9)	0.857853	0.859272
2243	brn	Beta-1,3-galactosyltransferase brn	Q24157	Q24157	Dorsal + Ventral Tl10B spn27A (9)	0.812437	0.820009
[truncated: 757 more rows]

## Sheet: Phosphoproteomics_EDScores
Phospho_Facility_ID	UniProt_ID	DV Cluster	Score DLVtl	Score DLVsp
960	A0A0B4KHP8	Dorsal (1)	0.763116	0.788522
13086	Q9VQD6	Dorsal (1)	0.642625	0.817581
12254	Q05913	Dorsal (1)	0.79341	0.813839
1079	A0A0B4LEV8	Dorsal (1)	0.838533	0.855383
1205	A0A0B4LFY0	Dorsal (1)	0.800778	0.843068
1320	A0A0B4LHR3	Dorsal (1)	0.662206	0.831061
1584	A1Z968	Dorsal (1)	0.774539	0.800443
1923	A4V3W2	Dorsal (1)	0.815896	0.842171
2887	E4NKG1	Dorsal (1)	0.661356	0.841262
2930	G4LTX1	Dorsal (1)	0.66506	0.827581
4050	M9PHL0	Dorsal (1)	0.637312	0.807292
4197	O16810	Dorsal (1)	0.679888	0.854003
5016	Q24311	Dorsal (1)	0.659531	0.823558
5044	Q24478	Dorsal (1)	0.80892	0.817659
5485	Q7K1V0	Dorsal (1)	0.816017	0.847882
5642	Q7KMH9	Dorsal (1)	0.788768	0.818017
5808	Q7KTS2	Dorsal (1)	0.818677	0.845126
6929	Q9V3C0	Dorsal (1)	0.7993	0.811624
6995	Q9V3P3	Dorsal (1)	0.761395	0.822575
7158	Q9V4P1	Dorsal (1)	0.78057	0.828064
7713	Q9VD26	Dorsal (1)	0.705513	0.870482
8513	Q9VL18	Dorsal (1)	0.828378	0.875058
8702	Q9VN21	Dorsal (1)	0.800841	0.829234
9150	Q9VRV1	Dorsal (1)	0.796209	0.80934
9499	X2JCY2	Dorsal (1)	0.790679	0.802602
9572	Q9VV79	Dorsal (1)	0.677247	0.854735
10267	Q9W0P8	Dorsal (1)	0.796032	0.846964
10897	Q9W5R5	Dorsal (1)	0.779899	0.794251
11049	X2J8R0	Dorsal (1)	0.81494	0.858495
11447	Q9N6D7	Dorsal (1)	0.771637	0.809646
11449	Q9N6D7	Dorsal (1)	0.776773	0.812884
12098	O16043	Dorsal (1)	0.697418	0.872963
12104	O16810	Dorsal (1)	0.801063	0.818902
12189	P26019	Dorsal (1)	0.697027	0.864859
13309	Q9VZ60	Dorsal (1)	0.829746	0.848538
13249	Q9VWV2	Dorsal (1)	0.816185	0.831171
13158	Q9VU43	Dorsal (1)	0.845108	0.847943
13464	Q9XZ34	Dorsal (1)	0.801086	0.799283
13347	Q9W1H5	Dorsal (1)	0.760377	0.777907
13078	Q9VPR5	Dorsal (1)	0.782525	0.810607
13121	Q9VRP5	Dorsal (1)	0.519407	0.621053
13028	Q9VN21	Dorsal (1)	0.84092	0.853281
13025	Q9VN21	Dorsal (1)	0.859735	0.864149
13004	Q9VME5	Dorsal (1)	0.709136	0.676338
12889	Q9VHC8	Dorsal (1)	0.859803	0.849638
12844	Q9VEJ1	Dorsal (1)	0.480692	0.480692
12834	Q9VDW6	Dorsal (1)	0.61929	0.464261
12718	Q9V677	Dorsal (1)	0.713814	0.717429
12685	Q9V3H9	Dorsal (1)	0.754381	0.77707
12603	Q8SXS0	Dorsal (1)	0.520677	0.520677
12521	Q8INM3	Dorsal (1)	0.518016	0.680376
12495	Q9VLL3	Dorsal (1)	0.776085	0.788361
12421	Q7KM15	Dorsal (1)	0.471871	0.656601
12406	Q7K3H0	Dorsal (1)	0.804207	0.80865
12222	P46863	Dorsal (1)	0.785437	0.811458
12109	O16810	Dorsal (1)	0.834756	0.847977
12089	M9W963	Dorsal (1)	0.380408	0.547109
12069	M9PHL0	Dorsal (1)	0.771375	0.792776
11919	M9NDA1	Dorsal (1)	0.858244	0.83782
11911	M9NCM6	Dorsal (1)	0.831853	0.843596
11802	E1JGV6	Dorsal (1)	0.684977	0.520817
11776	Q9VI18	Dorsal (1)	0.773911	0.797362
11765	B7Z0I8	Dorsal (1)	0.80837	0.826806
11701	B5RJJ4	Dorsal (1)	0.767279	0.777785
11670	Q0E8U6	Dorsal (1)	0.66258	0.661839
11669	A8DYJ2	Dorsal (1)	0.847161	0.848392
11604	A1Z968	Dorsal (1)	0.794168	0.818874
11541	A0A0B4LGB7	Dorsal (1)	0.854715	0.852733
11521	A1Z7J7	Dorsal (1)	0.805208	0.825047
11461	Q9VC89	Dorsal (1)	0.802829	0.81498
11383	A0A0B4KEH0	Dorsal (1)	0.817946	0.831041
11368	A0A0B4K7Y7	Dorsal (1)	0.793863	0.819371
11257	X2JE45	Dorsal (1)	0.828371	0.830732
11124	Q9Y1T2	Dorsal (1)	0.854906	0.841353
11098	Q9Y145	Dorsal (1)	0.793954	0.810537
11095	Q9Y145	Dorsal (1)	0.813077	0.819372
11012	Q9XZ34	Dorsal (1)	0.799759	0.8139
11002	Q9XZ29	Dorsal (1)	0.802897	0.799524
10995	Q9XZ22	Dorsal (1)	0.792212	0.79753
10993	Q9XZ22	Dorsal (1)	0.811703	0.811097
10977	Q9XZ21	Dorsal (1)	0.799528	0.823248
10976	Q9XZ21	Dorsal (1)	0.802241	0.823907
10960	Q9XZ21	Dorsal (1)	0.797039	0.798666
10957	Q9XZ21	Dorsal (1)	0.58919	0.64442
10939	Q9XYZ6	Dorsal (1)	0.500266	0.500266
10808	Q9W4M7	Dorsal (1)	0.799168	0.805718
10774	Q9W4C3	Dorsal (1)	0.81374	0.813321
10766	Q9W485	Dorsal (1)	0.763221	0.745252
10703	Q9W3Y3	Dorsal (1)	0.823421	0.846102
10700	Q9W3Y0	Dorsal (1)	0.860565	0.859011
10625	Q9W3J6	Dorsal (1)	0.811606	0.829638
10592	Q9W3D1	Dorsal (1)	0.841631	0.857627
10556	Q9W363	Dorsal (1)	0.64965	0.777801
10542	Q9W362	Dorsal (1)	0.695984	0.782857
10522	Q9W2X6	Dorsal (1)	0.769528	0.78172
10503	Q9W2U7	Dorsal (1)	0.847194	0.868031
10502	Q9W2U7	Dorsal (1)	0.81883	0.831166
10451	Q9W2M0	Dorsal (1)	0.83903	0.856151
10447	Q9W2M0	Dorsal (1)	0.868286	0.876454
10434	Q9W298	Dorsal (1)	0.632765	0.494629
10354	Q9W1H5	Dorsal (1)	0.789082	0.807939
10351	Q9W1H5	Dorsal (1)	0.800214	0.653258
10348	Q9W1H4	Dorsal (1)	0.7683	0.787335
10211	Q9W019	Dorsal (1)	0.812379	0.807825
10154	Q9VZ60	Dorsal (1)	0.829746	0.848538
10106	Q9VYY7	Dorsal (1)	0.763503	0.774771
10105	Q9VYY7	Dorsal (1)	0.763503	0.778306
10066	Q9VYV4	Dorsal (1)	0.807389	0.817139
10040	X2JEX7	Dorsal (1)	0.77662	0.799454
9998	Q9VYA4	Dorsal (1)	0.797627	0.826069
9972	Q9VY91	Dorsal (1)	0.772748	0.806737
9964	Q9VY54	Dorsal (1)	0.827198	0.840117
9935	Q9VXU6	Dorsal (1)	0.817546	0.819543
9925	X2JF83	Dorsal (1)	0.839728	0.842821
9901	Q9VXH3	Dorsal (1)	0.659499	0.49704
9900	Q9VXH3	Dorsal (1)	0.659499	0.49704
9892	Q9VXG1	Dorsal (1)	0.778535	0.794242
9855	X2JFW6	Dorsal (1)	0.826535	0.827761
9810	X2JFP6	Dorsal (1)	0.782111	0.791218
9804	Q9VWQ3	Dorsal (1)	0.491223	0.491223
9709	Q9VWD7	Dorsal (1)	0.806061	0.799829
9650	Q9VVW2	Dorsal (1)	0.808814	0.672662
9633	X2J969	Dorsal (1)	0.790199	0.816153
9623	Q9VVG9	Dorsal (1)	0.860284	0.866947
9481	Q9VUE5	Dorsal (1)	0.782478	0.79616
9320	Q9VTK7	Dorsal (1)	0.807227	0.800125
9259	Q9VT61	Dorsal (1)	0.843733	0.853027
9215	Q9VSK9	Dorsal (1)	0.522064	0.522064
9178	Q9VS50	Dorsal (1)	0.821223	0.819754
9166	Q9VS45	Dorsal (1)	0.815473	0.831933
9140	Q9VRP5	Dorsal (1)	0.778177	0.806003
9084	Q9VR19	Dorsal (1)	0.818741	0.828517
9077	Q9VR17	Dorsal (1)	0.807082	0.792733
9068	Q9VQZ8	Dorsal (1)	0.688142	0.71962
9046	Q9VQM0	Dorsal (1)	0.35839	0.35839
9042	Q9VQK5	Dorsal (1)	0.823873	0.817208
8996	Q9VQ78	Dorsal (1)	0.81034	0.805496
8991	Q9VQ58	Dorsal (1)	0.799569	0.799199
8955	Q9VPR5	Dorsal (1)	0.718508	0.789972
8943	Q9VPM5	Dorsal (1)	0.491536	0.491536
8866	Q9VP05	Dorsal (1)	0.79202	0.809918
8843	Q9VNW1	Dorsal (1)	0.875241	0.854891
8822	Q9VNH6	Dorsal (1)	0.832741	0.836888
8735	Q9VN82	Dorsal (1)	0.841219	0.841136
8726	Q9VN82	Dorsal (1)	0.817091	0.821015
8685	X2J4N6	Dorsal (1)	0.836116	0.830834
8566	Q9VLD6	Dorsal (1)	0.806647	0.809475
8488	Q9VKU7	Dorsal (1)	0.825655	0.836314
8467	Q9VKK1	Dorsal (1)	0.508011	0.690149
8315	Q9VJ57	Dorsal (1)	0.804058	0.802076
8307	X2J6U8	Dorsal (1)	0.784359	0.810322
8231	Q9VIK6	Dorsal (1)	0.807877	0.806249
8143	Q9VHT3	Dorsal (1)	0.662473	0.657758
8139	Q9VHR6	Dorsal (1)	0.864542	0.850183
8118	Q9VHL2	Dorsal (1)	0.810993	0.743695
8083	Q9VHC8	Dorsal (1)	0.735629	0.62069
8077	Q9VHC7	Dorsal (1)	0.501867	0.633468
8047	Q9VH82	Dorsal (1)	0.849669	0.846839
7997	Q9VGI8	Dorsal (1)	0.812005	0.816193
7992	Q9VGI8	Dorsal (1)	0.817518	0.82137
7982	Q9VGI5	Dorsal (1)	0.744953	0.777632
7958	Q9VG62	Dorsal (1)	0.789735	0.798913
7895	Q9VF03	Dorsal (1)	0.74398	0.77283
7890	Q9VF03	Dorsal (1)	0.846176	0.816937
7884	Q9VF03	Dorsal (1)	0.864399	0.874027
7880	Q9VEV7	Dorsal (1)	0.643159	0.643159
7873	Q9VEV3	Dorsal (1)	0.780816	0.770875
7795	Q9VDW6	Dorsal (1)	0.847343	0.869213
7792	Q9VDW6	Dorsal (1)	0.614936	0.458437
7787	Q9VDQ4	Dorsal (1)	0.612351	0.769742
7762	Q9VDG2	Dorsal (1)	0.795016	0.805279
7750	Q9VDE5	Dorsal (1)	0.768465	0.794729
7676	Q9VCP0	Dorsal (1)	0.811018	0.836132
7620	Q9VCC0	Dorsal (1)	0.818044	0.827063
7551	Q9VC60	Dorsal (1)	0.820078	0.808675
7523	Q9VC58	Dorsal (1)	0.517752	0.517752
7472	Q9VC08	Dorsal (1)	0.842298	0.826876
7357	Q9VB22	Dorsal (1)	0.781092	0.797978
7348	Q9VAZ0	Dorsal (1)	0.808013	0.82216
7347	Q9VAZ0	Dorsal (1)	0.734484	0.756524
7334	Q9VAW1	Dorsal (1)	0.812423	0.802552
7182	Q9V6K1	Dorsal (1)	0.500815	0.656033
7175	Q9V597	Dorsal (1)	0.746225	0.758789
7145	Q9V4D4	Dorsal (1)	0.804636	0.811132
7112	Q9V468	Dorsal (1)	0.809114	0.817905
7111	Q9V468	Dorsal (1)	0.773392	0.812572
7078	Q9V426	Dorsal (1)	0.854277	0.861259
7025	Q9V3V6	Dorsal (1)	0.795195	0.807689
7005	Q9V3V0	Dorsal (1)	0.810806	0.818214
7004	Q9V3V0	Dorsal (1)	0.776694	0.795336
6986	Q9V3H9	Dorsal (1)	0.499164	0.533317
6977	Q9V3H9	Dorsal (1)	0.818906	0.826365
6976	Q9V3H9	Dorsal (1)	0.807383	0.815937
6975	Q9V3H9	Dorsal (1)	0.636499	0.463442
6973	Q9V3H9	Dorsal (1)	0.783301	0.786652
6972	Q9V3H9	Dorsal (1)	0.753131	0.780669
6906	Q9U4G5	Dorsal (1)	0.647066	0.66328
6883	Q9NBD7	Dorsal (1)	0.782549	0.799726
6881	Q9NBD7	Dorsal (1)	0.791738	0.806307
6861	Q9I7K0	Dorsal (1)	0.784809	0.815976
6830	Q9GQN5	Dorsal (1)	0.876616	0.874544
6797	Q960X8	Dorsal (1)	0.772839	0.789593
6791	Q960T2	Dorsal (1)	0.860757	0.858371
6768	Q960D3	Dorsal (1)	0.805377	0.794607
6713	Q94883	Dorsal (1)	0.767722	0.788275
6596	Q8T0L3	Dorsal (1)	0.805707	0.81793
6553	Q8SXI2	Dorsal (1)	0.751725	0.75102
6516	Q8SWR8	Dorsal (1)	0.806146	0.818513
6473	Q8MSC4	Dorsal (1)	0.85692	0.873795
6424	Q8MMD2	Dorsal (1)	0.792992	0.815487
6364	Q8IRB5	Dorsal (1)	0.662286	0.765066
6361	Q8IRB5	Dorsal (1)	0.741292	0.782609
6293	Q8T0E7	Dorsal (1)	0.784044	0.806575
6204	Q8INM3	Dorsal (1)	0.824967	0.832847
6185	Q8INM3	Dorsal (1)	0.865419	0.873846
6183	Q8INM3	Dorsal (1)	0.785578	0.802423
6178	Q8INM3	Dorsal (1)	0.79965	0.787044
6155	Q8INM3	Dorsal (1)	0.792639	0.81143
6120	Q9VFH2	Dorsal (1)	0.82282	0.834603
6043	Q86BS3	Dorsal (1)	0.799132	0.810715
6030	Q86BP6	Dorsal (1)	0.711361	0.737208
6019	Q9VLL3	Dorsal (1)	0.793193	0.800265
6005	X2JKW3	Dorsal (1)	0.803792	0.830816
5941	Q7YZ95	Dorsal (1)	0.794204	0.683641
5887	Q7KVX5	Dorsal (1)	0.788707	0.803934
5858	Q9VT60	Dorsal (1)	0.861437	0.856839
5857	Q9VT60	Dorsal (1)	0.855563	0.858193
5849	Q7KUA4	Dorsal (1)	0.829485	0.834764
5812	Q7KTV5	Dorsal (1)	0.858227	0.852322
5806	Q7KTS2	Dorsal (1)	0.800884	0.815025
5750	Q7KSD3	Dorsal (1)	0.855001	0.860386
5749	Q7KSD3	Dorsal (1)	0.850062	0.858667
5748	Q7KSD3	Dorsal (1)	0.793581	0.80394
5737	Q9VB04	Dorsal (1)	0.84923	0.821096
5723	Q7KRW8	Dorsal (1)	0.807755	0.809727
5718	Q8IMG3	Dorsal (1)	0.856044	0.855157
5702	Q7KQM6	Dorsal (1)	0.647289	0.663467
5698	Q7KQM6	Dorsal (1)	0.682381	0.682381
5640	Q7KMH9	Dorsal (1)	0.858237	0.8672
5600	Q7K556	Dorsal (1)	0.823797	0.815328
5599	Q7K556	Dorsal (1)	0.803342	0.802148
5582	Q7K4L8	Dorsal (1)	0.787831	0.800245
5441	Q7K0L8	Dorsal (1)	0.795356	0.780818
5413	Q7JZ25	Dorsal (1)	0.803963	0.801816
5396	Q7JWH5	Dorsal (1)	0.847011	0.850829
5391	Q7JW61	Dorsal (1)	0.798802	0.667967
5317	Q7JQN4	Dorsal (1)	0.752135	0.77099
5316	Q7JQN4	Dorsal (1)	0.752135	0.77099
5315	Q7JQN4	Dorsal (1)	0.752135	0.77099
5291	Q7JQU9	Dorsal (1)	0.808365	0.815075
5244	Q5BI31	Dorsal (1)	0.863218	0.881753
5243	Q5BI31	Dorsal (1)	0.863218	0.881753
5194	Q4QQ01	Dorsal (1)	0.85869	0.85388
5193	Q4QQ01	Dorsal (1)	0.860526	0.843301
5060	Q24478	Dorsal (1)	0.780974	0.797046
5043	Q24478	Dorsal (1)	0.795112	0.824082
5042	Q24478	Dorsal (1)	0.831162	0.841756
4994	Q24154	Dorsal (1)	0.585967	0.735247
4991	Q53ZT0	Dorsal (1)	0.83836	0.843323
4912	Q0E8J0	Dorsal (1)	0.799476	0.812729
4879	Q05913	Dorsal (1)	0.645408	0.497613
4843	P98159	Dorsal (1)	0.78707	0.805127
4842	P98159	Dorsal (1)	0.787443	0.804015
4829	P91927	Dorsal (1)	0.771525	0.775433
4816	P83103	Dorsal (1)	0.785217	0.799549
4741	P48592	Dorsal (1)	0.84215	0.846258
4739	P48592	Dorsal (1)	0.783214	0.815569
4738	P48591	Dorsal (1)	0.871518	0.879074
4714	P42283	Dorsal (1)	0.732517	0.795479
4697	P40796	Dorsal (1)	0.80428	0.809898
4685	P39768	Dorsal (1)	0.749607	0.787553
4679	P35600	Dorsal (1)	0.795045	0.809858
4678	P35600	Dorsal (1)	0.798284	0.811595
4619	P29746	Dorsal (1)	0.649778	0.649778
4614	P29746	Dorsal (1)	0.833238	0.831679
4585	P25823	Dorsal (1)	0.562795	0.651928
4532	P20439	Dorsal (1)	0.839682	0.840308
4496	P15348	Dorsal (1)	0.466643	0.466643
4481	P13496	Dorsal (1)	0.776015	0.79089
4424	P06605	Dorsal (1)	0.856314	0.844866
4408	P05084	Dorsal (1)	0.817334	0.816534
4274	O61345	Dorsal (1)	0.793256	0.812184
4238	Q7KW02	Dorsal (1)	0.835216	0.836108
4196	O16810	Dorsal (1)	0.849365	0.853593
4193	O16797	Dorsal (1)	0.458517	0.458517
4151	N0D8I3	Dorsal (1)	0.766393	0.772583
4112	Q9VPB2	Dorsal (1)	0.812936	0.778128
4096	Q9VVW6	Dorsal (1)	0.500631	0.500631
4082	Q9VTY8	Dorsal (1)	0.795823	0.814695
3990	M9PGW8	Dorsal (1)	0.633203	0.663167
3976	Q7YU15	Dorsal (1)	0.821206	0.821557
3962	M9PGH6	Dorsal (1)	0.635713	0.635009
3885	Q7KTV5	Dorsal (1)	0.501851	0.501851
3860	Q7KTV5	Dorsal (1)	0.850836	0.849217
3859	Q7KTV5	Dorsal (1)	0.494048	0.469467
3853	Q7KTV5	Dorsal (1)	0.453169	0.650542
3821	M9PFM5	Dorsal (1)	0.856533	0.849762
3806	M9PF24	Dorsal (1)	0.843259	0.842224
3745	Q8SX64	Dorsal (1)	0.770079	0.773923
3717	M9PD95	Dorsal (1)	0.826962	0.832557
3706	M9PIH3	Dorsal (1)	0.513444	0.647822
3642	M9PCV9	Dorsal (1)	0.797744	0.80573
3640	M9PCQ8	Dorsal (1)	0.846147	0.852208
3634	M9PCN6	Dorsal (1)	0.855708	0.860298
3540	M9PBH9	Dorsal (1)	0.781447	0.796998
3490	M9PB57	Dorsal (1)	0.824546	0.828474
3337	M9NE89	Dorsal (1)	0.804532	0.818056
3275	M9NDL7	Dorsal (1)	0.849175	0.846212
3247	M9ND37	Dorsal (1)	0.759985	0.799002
3225	M9NCX1	Dorsal (1)	0.858876	0.855972
3117	M9MS15	Dorsal (1)	0.716324	0.758293
3012	L0MLP2	Dorsal (1)	0.763345	0.752315
3003	M9MQH9	Dorsal (1)	0.836971	0.83712
2980	M9NDX8	Dorsal (1)	0.652049	0.490797
2915	Q8IRC1	Dorsal (1)	0.849597	0.840059
2893	E4NKG1	Dorsal (1)	0.758665	0.787129
2878	E2QD64	Dorsal (1)	0.677995	0.821286
2823	E2QC56	Dorsal (1)	0.521771	0.673541
2610	E1JHE1	Dorsal (1)	0.811924	0.822871
2604	E1JHA4	Dorsal (1)	0.810278	0.812703
2603	E1JHA4	Dorsal (1)	0.791473	0.802581
2570	D3PFH9	Dorsal (1)	0.804804	0.797388
2514	Q59E36	Dorsal (1)	0.827309	0.84646
2513	Q59E36	Dorsal (1)	0.827309	0.844869
2498	X2J9A4	Dorsal (1)	0.783989	0.771669
2495	M9PHW9	Dorsal (1)	0.786637	0.807828
2472	Q9VYL7	Dorsal (1)	0.79471	0.820628
2459	B7Z0V1	Dorsal (1)	0.742909	0.760599
2434	B7Z0I8	Dorsal (1)	0.76244	0.787201
2420	B7Z0I8	Dorsal (1)	0.494479	0.656145
2395	B7Z0I8	Dorsal (1)	0.846698	0.868177
2390	B7Z0I8	Dorsal (1)	0.817456	0.812539
2373	B7Z0I8	Dorsal (1)	0.826699	0.85836
2355	M9PFR5	Dorsal (1)	0.524723	0.676472
2329	B7Z0B0	Dorsal (1)	0.802226	0.814498
2285	B7Z002	Dorsal (1)	0.839877	0.845215
2244	B7Z002	Dorsal (1)	0.748416	0.775688
2222	B7YZZ9	Dorsal (1)	0.866457	0.853512
2184	B7YZQ1	Dorsal (1)	0.836821	0.838249
2160	B5RJJ4	Dorsal (1)	0.77864	0.769101
2135	Q9W3W1	Dorsal (1)	0.747142	0.78758
2076	-	Dorsal (1)	0.35839	0.35839
2075	Q9VQM0	Dorsal (1)	0.35839	0.35839
2050	Q9V3C7	Dorsal (1)	0.812262	0.833043
1882	A4V2K7	Dorsal (1)	0.768082	0.785919
1875	A4V2K7	Dorsal (1)	0.75021	0.750841
1808	A1ZBW7	Dorsal (1)	0.812873	0.811352
1777	A1ZBT6	Dorsal (1)	0.786732	0.804122
1776	A1ZBT6	Dorsal (1)	0.786732	0.804122
1721	B3DN64	Dorsal (1)	0.775294	0.778465
1703	A1ZAT5	Dorsal (1)	0.812392	0.817528
1702	Q9NDR1	Dorsal (1)	0.471595	0.471595
1685	A1ZAK7	Dorsal (1)	0.733717	0.740306
1679	Q8IFW6	Dorsal (1)	0.504062	0.504062
1671	Q8IFW6	Dorsal (1)	0.809804	0.816859
1666	Q8IFW6	Dorsal (1)	0.793168	0.808808
1643	A1Z9S6	Dorsal (1)	0.504087	0.553827
1594	A1Z968	Dorsal (1)	0.77441	0.722637
1538	E1JH24	Dorsal (1)	0.800893	0.815365
1478	A1Z6I7	Dorsal (1)	0.74079	0.761563
1442	A1A708	Dorsal (1)	0.818052	0.823169
1441	A1A708	Dorsal (1)	0.812165	0.817412
1389	A0A0S0X2W5	Dorsal (1)	0.790747	0.806856
1321	A0A0B4LIP5	Dorsal (1)	0.835304	0.864655
1311	A0A0B4LHI3	Dorsal (1)	0.636837	0.636837
1298	Q8SX98	Dorsal (1)	0.868622	0.875609
1290	A0A0B4LGZ6	Dorsal (1)	0.497405	0.6777
1261	A0A0B4LGT7	Dorsal (1)	0.643208	0.635191
1215	A0A0B4LG36	Dorsal (1)	0.670193	0.685412
1183	A0A0B4LGV3	Dorsal (1)	0.660935	0.672674
1174	A0A0B4LFQ2	Dorsal (1)	0.66286	0.806626
1169	A0A0B4LFQ2	Dorsal (1)	0.806739	0.826109
1151	A0A0B4LFJ4	Dorsal (1)	0.799175	0.799854
1101	A1Z9M4	Dorsal (1)	0.837939	0.851724
1072	A0A0B4LEV2	Dorsal (1)	0.865097	0.879769
1036	Q9V9Y9	Dorsal (1)	0.680259	0.805741
1017	A0A0B4KHZ0	Dorsal (1)	0.822948	0.82574
994	A0A0B4KHY8	Dorsal (1)	0.792064	0.790571
923	A0A0B4LIK5	Dorsal (1)	0.818299	0.818481
869	Q9VC89	Dorsal (1)	0.802829	0.81498
865	Q9VC89	Dorsal (1)	0.436438	0.436438
858	H1UUJ8	Dorsal (1)	0.815533	0.833245
829	A0A0B4KH73	Dorsal (1)	0.805455	0.826125
740	Q9W1Y0	Dorsal (1)	0.851394	0.858502
617	A0A0B4KF05	Dorsal (1)	0.806768	0.815477
517	A0A0B4KEI5	Dorsal (1)	0.852663	0.85743
515	E1JH23	Dorsal (1)	0.796821	0.804008
426	A0A0B4K7Y7	Dorsal (1)	0.80611	0.783002
417	A0A0B4K7Y7	Dorsal (1)	0.834368	0.837766
407	A0A0B4LFF8	Dorsal (1)	0.793725	0.796469
367	A1ZB80	Dorsal (1)	0.79959	0.814115
357	A1ZB80	Dorsal (1)	0.659596	0.659596
333	A0A0B4KHR8	Dorsal (1)	0.795288	0.806463
309	A0A0B4K6W1	Dorsal (1)	0.776203	0.804102
238	Q9VG78	Dorsal (1)	0.630216	0.630216
222	A0A0B4K6B8	Dorsal (1)	0.797974	0.799936
221	A0A0B4K6B8	Dorsal (1)	0.779563	0.768126
214	O46342	Dorsal (1)	0.586466	0.604806
136	E1JJ72	Dorsal (1)	0.760207	0.625019
125	A0A0B4JDC3	Dorsal (1)	0.768071	0.789564
116	A0A0B4JD48	Dorsal (1)	0.68741	0.700901
115	A0A0B4JD46	Dorsal (1)	0.763543	0.773868
111	A0A0B4JD33	Dorsal (1)	0.795863	0.809111
105	C8VV76	Dorsal (1)	0.766955	0.793976
81	A0A0B4LHQ4	Dorsal (1)	0.795438	0.814469
77	A0A0B4JCV4	Dorsal (1)	0.797708	0.811457
64	A0A0B4JCV4	Dorsal (1)	0.770557	0.801292
13488	Q9Y145	Dorsal (1)	0.813212	0.819507
34	E5DK16	Dorsal (1)	0.802033	0.802384
371	A0A0B4K7G4	Lateral (2)	0.78584	0.762902
2357	M9PFR5	Lateral (2)	0.800785	0.746975
6233	Q8INX3	Lateral (2)	0.717149	0.709154
6916	Q9UAS6	Lateral (2)	0.793171	0.75513
6917	Q9UAS6	Lateral (2)	0.786432	0.747589
7197	Q9V7P1	Lateral (2)	0.793003	0.771033
7198	Q9V7P1	Lateral (2)	0.793003	0.771033
7474	Q9VC08	Lateral (2)	0.782593	0.76957
8160	Q9VI53	Lateral (2)	0.792523	0.608962
9920	Q9VXQ5	Lateral (2)	0.790808	0.776186
9922	X2JF83	Lateral (2)	0.772685	0.754621
10194	Q9VZS7	Lateral (2)	0.786764	0.748155
10659	X2JE07	Lateral (2)	0.771943	0.76674
12271	Q0KHR4	Lateral (2)	0.799859	0.603428
12955	Q9VK85	Lateral (2)	0.768763	0.758308
4278	O61613	Lateral (2)	0.789127	0.763819
3613	M9PCC1	Lateral (2)	0.77854	0.743596
3851	M9PFY2	Lateral (2)	0.71895	0.732339
6071	Q9VDD2	Lateral (2)	0.808729	0.810345
6058	Q86BY9	Lateral (2)	0.766233	0.785275
5959	Q7YZ99	Lateral (2)	0.770411	0.778971
5947	Q7YZ99	Lateral (2)	0.796727	0.783885
5946	Q7YZ99	Lateral (2)	0.78674	0.761678
5879	Q9W4C4	Lateral (2)	0.788081	0.796809
5867	Q7KV99	Lateral (2)	0.779539	0.809442
5816	Q7KU01	Lateral (2)	0.786022	0.815316
5681	Q7KN62	Lateral (2)	0.806401	0.800304
5533	Q7K3D4	Lateral (2)	0.791734	0.802434
5492	Q7K1V1	Lateral (2)	0.425935	0.425935
5429	Q7K0D8	Lateral (2)	0.773592	0.781832
5409	Q7JXZ2	Lateral (2)	0.631968	0.631968
5401	Q7JWS8	Lateral (2)	0.794783	0.794468
4105	M9PIC3	Lateral (2)	0.793145	0.796908
5257	Q5LJZ2	Lateral (2)	0.770797	0.770857
5245	Q5BI31	Lateral (2)	0.794255	0.819066
5210	Q4V3Z5	Lateral (2)	0.79164	0.800933
5104	Q24574	Lateral (2)	0.769833	0.743978
5062	Q24478	Lateral (2)	0.814342	0.823631
5048	Q24478	Lateral (2)	0.791678	0.790974
5031	Q24371	Lateral (2)	0.759356	0.792384
4981	Q23976	Lateral (2)	0.79235	0.805423
4926	Q0E8X6	Lateral (2)	0.825811	0.814257
4917	X2J8G3	Lateral (2)	0.721522	0.737306
4913	Q0E8J0	Lateral (2)	0.706432	0.748141
4849	Q01637	Lateral (2)	0.778388	0.780946
4178	O16043	Lateral (2)	0.774545	0.789685
4607	P29327	Lateral (2)	0.744631	0.747038
4604	P28668	Lateral (2)	0.801919	0.794542
4586	P25823	Lateral (2)	0.78743	0.769306
4573	P25028	Lateral (2)	0.78915	0.794724
4572	P25028	Lateral (2)	0.78915	0.794724
4563	Q8IMF5	Lateral (2)	0.791818	0.807404
4560	P23128	Lateral (2)	0.780601	0.769258
4199	O16810	Lateral (2)	0.810856	0.792748
4497	P15348	Lateral (2)	0.795334	0.782492
4455	X2JCP8	Lateral (2)	0.391769	0.391769
4449	P09180	Lateral (2)	0.80078	0.782174
4331	X2J516	Lateral (2)	0.814236	0.814618
4325	O97132	Lateral (2)	0.771672	0.770488
4320	O96838	Lateral (2)	0.792329	0.799272
4301	Q2PE37	Lateral (2)	0.81096	0.791526
4502	P17210	Lateral (2)	0.792368	0.786084
4550	Q4H2F8	Lateral (2)	0.753411	0.757739
4186	O16043	Lateral (2)	0.612856	0.733853
4656	P35600	Lateral (2)	0.79179	0.795577
4662	P35600	Lateral (2)	0.772667	0.759171
4712	P42283	Lateral (2)	0.755905	0.778927
4726	P45437	Lateral (2)	0.78541	0.772893
4780	P54397	Lateral (2)	0.792772	0.782291
4824	P91682	Lateral (2)	0.762505	0.794667
4840	P98159	Lateral (2)	0.786623	0.787558
4131	M9PJC7	Lateral (2)	0.777914	0.788289
5258	Q5LJZ2	Lateral (2)	0.770797	0.770857
5280	Q5U0X8	Lateral (2)	0.703467	0.715138
5281	Q5U0X8	Lateral (2)	0.784728	0.770829
5342	Q7JRH5	Lateral (2)	0.79363	0.768851
5362	Q7JVL3	Lateral (2)	0.7853	0.809382
3993	M9PGW8	Lateral (2)	0.384297	0.384297
3935	M9PG50	Lateral (2)	0.806642	0.812472
3881	Q7KTV5	Lateral (2)	0.620113	0.759876
4254	O46067	Lateral (2)	0.476589	0.476589
3849	M9PFY2	Lateral (2)	0.813479	0.813136
3827	M9PFS0	Lateral (2)	0.793517	0.798656
3816	M9PFF0	Lateral (2)	0.775215	0.788112
3768	M9PEJ1	Lateral (2)	0.790219	0.810379
3690	Q0E8R8	Lateral (2)	0.773118	0.797999
3567	M9PE73	Lateral (2)	0.42233	0.42233
3566	M9PE73	Lateral (2)	0.788652	0.791456
3565	M9PE73	Lateral (2)	0.806789	0.80401
3518	M9PB86	Lateral (2)	0.528705	0.660206
3507	M9PB68	Lateral (2)	0.787346	0.790642
3494	M9PB60	Lateral (2)	0.687193	0.691674
3474	M9PAY6	Lateral (2)	0.733451	0.736279
177	A0A0B4K623	Lateral (2)	0.795695	0.782323
308	A0A0B4K6W1	Lateral (2)	0.792438	0.781257
377	A1Z8W9	Lateral (2)	0.807342	0.79844
425	A0A0B4K7Y7	Lateral (2)	0.781087	0.790506
459	A1Z945	Lateral (2)	0.807121	0.800522
573	Q9N693	Lateral (2)	0.817506	0.812811
633	Q0E965	Lateral (2)	0.794868	0.794699
675	A0A0B4KFE9	Lateral (2)	0.804857	0.804167
713	A0A0B4KH36	Lateral (2)	0.793337	0.779442
785	A0A0B4KG81	Lateral (2)	0.773213	0.76689
820	A8WHL4	Lateral (2)	0.782705	0.795921
939	A0A0B4KHJ5	Lateral (2)	0.816974	0.813988
1061	A0A0B4KI71	Lateral (2)	0.793309	0.803914
1084	A0A0B4LEV8	Lateral (2)	0.811422	0.815252
1222	A0A0B4LGB7	Lateral (2)	0.761749	0.744799
1399	A0A126BEE6	Lateral (2)	0.783923	0.79619
1416	A0A126GUU0	Lateral (2)	0.802479	0.803813
1437	A1A708	Lateral (2)	0.747993	0.743766
1558	A1Z8R2	Lateral (2)	0.795408	0.794036
1625	A1Z9S6	Lateral (2)	0.654178	0.662597
1677	Q8IFW6	Lateral (2)	0.387922	0.387922
1981	Q9VJI6	Lateral (2)	0.758019	0.760531
2044	M9PEM7	Lateral (2)	0.789826	0.819568
2105	A8JV07	Lateral (2)	0.787448	0.769355
2223	B7YZZ9	Lateral (2)	0.804663	0.806112
2229	B7YZZ9	Lateral (2)	0.769947	0.806314
2243	B7Z002	Lateral (2)	0.393409	0.393409
2310	M9MRW2	Lateral (2)	0.77973	0.772369
2316	B7Z066	Lateral (2)	0.796624	0.807047
2425	B7Z0I8	Lateral (2)	0.779188	0.794443
2542	D0Z760	Lateral (2)	0.78085	0.790294
2678	M9PIA6	Lateral (2)	0.779944	0.771609
2748	E1JIS1	Lateral (2)	0.379666	0.587716
2864	Q9VQ76	Lateral (2)	0.772348	0.62789
2964	M9NDX8	Lateral (2)	0.756891	0.755992
3017	L0MLP2	Lateral (2)	0.670489	0.684492
3037	L0MPR2	Lateral (2)	0.808063	0.779091
3120	M9MS15	Lateral (2)	0.661535	0.672709
3252	M9ND37	Lateral (2)	0.782772	0.76914
3415	M9NFQ5	Lateral (2)	0.49705	0.49705
3457	M9NG39	Lateral (2)	0.8038	0.786707
6138	Q8INH7	Lateral (2)	0.780957	0.768559
3458	M9NG39	Lateral (2)	0.7653	0.776229
3450	M9NFV3	Lateral (2)	0.775484	0.801333
3354	M9NED8	Lateral (2)	0.777443	0.799025
3230	M9NCX1	Lateral (2)	0.775875	0.781118
3089	M9MSI8	Lateral (2)	0.768779	0.796877
3019	L0MLP2	Lateral (2)	0.670489	0.684492
3002	M9MQH9	Lateral (2)	0.752495	0.75454
2924	F3YDJ5	Lateral (2)	0.771359	0.775011
2846	E2QCK0	Lateral (2)	0.77624	0.790383
2707	E1JIB9	Lateral (2)	0.79116	0.804318
2581	E1JGV6	Lateral (2)	0.770026	0.772264
2489	E2QD63	Lateral (2)	0.797342	0.803578
2348	B7Z0E2	Lateral (2)	0.794796	0.797745
2315	M9MRW2	Lateral (2)	0.813229	0.802468
2260	B7Z002	Lateral (2)	0.770993	0.77962
2240	B7Z002	Lateral (2)	0.796409	0.766617
2224	B7YZZ9	Lateral (2)	0.80879	0.777086
2107	A8JV07	Lateral (2)	0.78499	0.790432
2092	Q9W4F6	Lateral (2)	0.435481	0.435481
2021	M9PBL6	Lateral (2)	0.795048	0.78507
1743	A1ZBE9	Lateral (2)	0.789234	0.783559
1661	A1ZA92	Lateral (2)	0.754262	0.761028
1562	A1Z8R2	Lateral (2)	0.726332	0.75679
1438	A1A708	Lateral (2)	0.789854	0.786922
1436	A1A708	Lateral (2)	0.790325	0.786922
1406	A0A126GUQ5	Lateral (2)	0.686907	0.720619
1393	A0A126BEE6	Lateral (2)	0.794068	0.778698
1150	A0A0B4LFJ4	Lateral (2)	0.795723	0.793469
1083	A0A0B4LEV8	Lateral (2)	0.808944	0.780129
997	A0A0B4KHY8	Lateral (2)	0.785839	0.783915
900	A0A0B4KHE9	Lateral (2)	0.790734	0.795664
794	Q9N6D7	Lateral (2)	0.797369	0.801501
775	A0A0B4KG81	Lateral (2)	0.773201	0.785249
703	A0A0B4KFJ7	Lateral (2)	0.768321	0.766415
634	Q0E965	Lateral (2)	0.76444	0.784442
587	A0A0B4KEV9	Lateral (2)	0.741981	0.75056
507	A0A0B4KEE7	Lateral (2)	0.766375	0.775612
445	A0A0B4LF25	Lateral (2)	0.777202	0.777041
421	A0A0B4K7Y7	Lateral (2)	0.785833	0.790405
372	A0A0B4K7G4	Lateral (2)	0.786411	0.78587
277	A0A0B4KHY2	Lateral (2)	0.791571	0.793566
13549	X2JD55	Lateral (2)	0.388309	0.388309
13472	Q9Y095	Lateral (2)	0.465496	0.643344
13389	Q9W397	Lateral (2)	0.767854	0.773983
13366	Q9W2S1	Lateral (2)	0.812368	0.790494
13365	Q9W2S1	Lateral (2)	0.788215	0.770248
13316	Q9VZS1	Lateral (2)	0.799919	0.811859
13263	X2JF83	Lateral (2)	0.759406	0.772828
13199	Q9VV74	Lateral (2)	0.581853	0.581853
13125	Q9VRV1	Lateral (2)	0.492989	0.669338
13115	Q9VRM6	Lateral (2)	0.749992	0.7512
13042	Q9VNE0	Lateral (2)	0.806341	0.808418
12958	Q9VKJ1	Lateral (2)	0.781742	0.79671
12956	Q9VK85	Lateral (2)	0.51754	0.673062
12892	Q9VHI8	Lateral (2)	0.791903	0.779796
12878	Q9VHC0	Lateral (2)	0.797852	0.794909
12871	Q9VGI5	Lateral (2)	0.557197	0.557197
12869	Q9VGA4	Lateral (2)	0.749822	0.768048
12828	Q9VDG2	Lateral (2)	0.53785	0.65707
12789	Q9VC54	Lateral (2)	0.808314	0.785314
12755	Q9VAU6	Lateral (2)	0.776251	0.770045
12754	Q9VAN6	Lateral (2)	0.631773	0.66831
12715	Q9V4P1	Lateral (2)	0.781809	0.778398
12708	Q9V471	Lateral (2)	0.803948	0.78555
12689	X2JF59	Lateral (2)	0.636269	0.767443
12593	Q8SX89	Lateral (2)	0.684287	0.722381
12391	Q7K180	Lateral (2)	0.61642	0.624522
12378	Q7JVY2	Lateral (2)	0.778895	0.768711
12319	Q27333	Lateral (2)	0.784191	0.787025
12305	Q24478	Lateral (2)	0.774183	0.787894
12300	Q24371	Lateral (2)	0.784761	0.808518
12275	Q0KHZ9	Lateral (2)	0.774096	0.750963
12228	P52304	Lateral (2)	0.615978	0.760385
12203	P35600	Lateral (2)	0.790804	0.791443
12190	P28668	Lateral (2)	0.805346	0.7927
12099	O16043	Lateral (2)	0.765019	0.731041
12050	M9PG50	Lateral (2)	0.807863	0.815015
12041	Q7KTV5	Lateral (2)	0.648436	0.735507
12016	M9PDG3	Lateral (2)	0.77663	0.771534
11963	M9NG39	Lateral (2)	0.768411	0.774868
11694	A8JV07	Lateral (2)	0.753789	0.77819
11679	M9PBL6	Lateral (2)	0.731717	0.742215
11647	A4V2K7	Lateral (2)	0.808852	0.809594
11581	A1Z6I7	Lateral (2)	0.796316	0.797748
11580	A1Z6I7	Lateral (2)	0.794108	0.795798
11566	A0A126BEE6	Lateral (2)	0.744351	0.739777
11507	Q8IMF5	Lateral (2)	0.806094	0.803465
11411	Q0E965	Lateral (2)	0.797819	0.78734
11401	Q95RL2	Lateral (2)	0.803054	0.805431
10911	Q9XTP7	Lateral (2)	0.78043	0.81095
10854	Q9W541	Lateral (2)	0.784324	0.788028
10843	Q9W526	Lateral (2)	0.78941	0.806397
10792	Q9W4K1	Lateral (2)	0.793437	0.807498
10734	Q9W425	Lateral (2)	0.803162	0.800187
10652	X2JE07	Lateral (2)	0.798768	0.773166
10572	Q9W397	Lateral (2)	0.796608	0.800144
10492	Q9W2U7	Lateral (2)	0.616249	0.428034
10488	Q9W2U7	Lateral (2)	0.798733	0.798371
10469	Q9W2S1	Lateral (2)	0.78305	0.768675
10457	Q9W2N6	Lateral (2)	0.770783	0.76344
10455	Q9W2N6	Lateral (2)	0.809168	0.777418
10336	Q9W1G7	Lateral (2)	0.706615	0.712379
10335	Q9W1G7	Lateral (2)	0.782668	0.766993
10240	Q9W0A8	Lateral (2)	0.802671	0.794055
10124	X2JEU3	Lateral (2)	0.681668	0.675277
10116	X2JEU3	Lateral (2)	0.82231	0.809633
10058	Q9VYT4	Lateral (2)	0.787897	0.778329
10022	Q9VYE9	Lateral (2)	0.482654	0.482654
10017	Q9VYE3	Lateral (2)	0.753263	0.734064
9827	Q9VWV2	Lateral (2)	0.798442	0.798037
9784	X2JL49	Lateral (2)	0.435503	0.435503
9783	X2JL49	Lateral (2)	0.542357	0.658595
9782	X2JL49	Lateral (2)	0.761265	0.791902
9770	X2JFQ1	Lateral (2)	0.806127	0.814068
9684	Q9VW54	Lateral (2)	0.766346	0.785804
9568	Q9VV74	Lateral (2)	0.770381	0.783365
9470	Q9VUC4	Lateral (2)	0.775128	0.781526
9432	Q9VU84	Lateral (2)	0.786799	0.78112
9397	Q9VU43	Lateral (2)	0.818508	0.807108
9380	Q9VU43	Lateral (2)	0.773683	0.797891
9379	Q9VU43	Lateral (2)	0.790501	0.777835
9378	Q9VU43	Lateral (2)	0.791938	0.779296
9372	Q9VU43	Lateral (2)	0.806756	0.777435
9329	Q9VTS3	Lateral (2)	0.72323	0.750884
9294	Q9VTE2	Lateral (2)	0.73168	0.759719
9203	Q9VSF2	Lateral (2)	0.800727	0.805135
9139	Q9VRP5	Lateral (2)	0.798512	0.792946
9116	Q9VRM3	Lateral (2)	0.764323	0.795477
9109	Q9VRG8	Lateral (2)	0.799206	0.794884
8971	Q9VPX7	Lateral (2)	0.800109	0.778437
8970	Q9VPX7	Lateral (2)	0.79672	0.797888
8948	Q9VPM5	Lateral (2)	0.637048	0.773251
8927	Q9VPL5	Lateral (2)	0.767725	0.793732
8814	Q9VNH5	Lateral (2)	0.774357	0.796752
8802	Q9VNE9	Lateral (2)	0.800854	0.793757
8762	Q9VNE0	Lateral (2)	0.808352	0.810868
8689	Q9VMQ8	Lateral (2)	0.627874	0.777138
8583	Q9VLV5	Lateral (2)	0.794556	0.789302
8537	Q9VL71	Lateral (2)	0.764882	0.778944
8531	Q9VL71	Lateral (2)	0.785538	0.783651
8530	Q9VL71	Lateral (2)	0.777493	0.776985
8487	Q9VKU7	Lateral (2)	0.798248	0.791024
8483	Q9VKU2	Lateral (2)	0.762156	0.77113
8480	Q9VKU2	Lateral (2)	0.764777	0.778568
8479	Q9VKU2	Lateral (2)	0.787055	0.783109
8453	Q9VKJ1	Lateral (2)	0.775573	0.784416
8452	Q9VKJ1	Lateral (2)	0.762903	0.754891
8439	Q9VKF0	Lateral (2)	0.764736	0.761606
8435	Q9VKD2	Lateral (2)	0.787644	0.770728
8426	Q9VKC1	Lateral (2)	0.211693	0.211693
8425	Q9VKB9	Lateral (2)	0.767002	0.760065
8400	Q9VK39	Lateral (2)	0.620321	0.491647
8367	Q9VJQ4	Lateral (2)	0.774113	0.777476
8365	Q9VJQ4	Lateral (2)	0.732516	0.705681
8364	Q9VJQ4	Lateral (2)	0.773419	0.778297
8361	Q9VJK9	Lateral (2)	0.782123	0.789473
8325	Q9VJ87	Lateral (2)	0.814778	0.794459
8323	Q9VJ87	Lateral (2)	0.769173	0.750804
8314	Q9VJ57	Lateral (2)	0.799412	0.78773
8295	Q9VJ14	Lateral (2)	0.791308	0.811962
8250	Q9VIP2	Lateral (2)	0.773978	0.784938
8220	Q9VIH1	Lateral (2)	0.481108	0.642999
8214	Q9VIF1	Lateral (2)	0.760853	0.786496
8213	Q9VIF1	Lateral (2)	0.775732	0.777561
8195	Q9VID9	Lateral (2)	0.797445	0.781255
8181	Q9VID9	Lateral (2)	0.749467	0.736716
8124	Q9VHN7	Lateral (2)	0.793036	0.791709
8063	Q9VHC0	Lateral (2)	0.799034	0.802062
8057	Q9VHC0	Lateral (2)	0.797852	0.794909
8056	Q9VHC0	Lateral (2)	0.800169	0.80694
8003	Q9VGJ8	Lateral (2)	0.495657	0.495657
7926	Q9VFT4	Lateral (2)	0.740571	0.707186
7862	Q9VEP6	Lateral (2)	0.772987	0.758029
7825	Q9VE98	Lateral (2)	0.760143	0.768794
7683	Q9VCQ7	Lateral (2)	0.339548	0.434932
7631	Q9VCF1	Lateral (2)	0.805587	0.794818
7628	Q9VCF1	Lateral (2)	0.800003	0.788243
7625	Q9VCD3	Lateral (2)	0.78237	0.789852
7521	Q9VC58	Lateral (2)	0.487949	0.487949
7518	Q9VC54	Lateral (2)	0.785302	0.792499
7500	Q9VC45	Lateral (2)	0.761267	0.792683
7476	Q9VC08	Lateral (2)	0.791913	0.772189
7443	Q9VBU7	Lateral (2)	0.809957	0.815991
7434	Q9VBU7	Lateral (2)	0.758331	0.763184
7417	Q9VBU7	Lateral (2)	0.739421	0.731967
7416	Q9VBU7	Lateral (2)	0.781782	0.788275
7404	Q9VBP5	Lateral (2)	0.81569	0.809674
7344	Q9VAY8	Lateral (2)	0.781049	0.782891
7339	Q9VAW1	Lateral (2)	0.804351	0.798425
7338	Q9VAW1	Lateral (2)	0.800937	0.798401
7322	Q9VAW1	Lateral (2)	0.802227	0.785124
7315	Q9VAW1	Lateral (2)	0.794216	0.788719
7314	Q9VAW1	Lateral (2)	0.817039	0.805951
7223	Q9V9U3	Lateral (2)	0.689799	0.710733
7221	Q9V9U3	Lateral (2)	0.774774	0.776186
7212	Q9V9T4	Lateral (2)	0.800061	0.797967
7159	Q9V4P1	Lateral (2)	0.72533	0.707603
7103	Q9V468	Lateral (2)	0.794876	0.787138
6926	Q9V3C0	Lateral (2)	0.709497	0.73509
6925	Q9V3C0	Lateral (2)	0.709497	0.731766
6910	Q9U5L1	Lateral (2)	0.55187	0.524213
6761	Q9VKD8	Lateral (2)	0.49669	0.49669
6748	Q95SH7	Lateral (2)	0.785408	0.76751
6710	Q94546	Lateral (2)	0.806655	0.790165
6654	Q94527	Lateral (2)	0.801449	0.802661
6653	Q94527	Lateral (2)	0.801449	0.802661
6651	X2JD82	Lateral (2)	0.792336	0.793107
6625	Q8T6B9	Lateral (2)	0.792493	0.7631
6618	Q8T626	Lateral (2)	0.765235	0.75946
6613	Q8T4A9	Lateral (2)	0.686578	0.711007
6560	Q8SXM8	Lateral (2)	0.702917	0.693879
6547	Q8SX89	Lateral (2)	0.753413	0.767946
6410	Q8MLV1	Lateral (2)	0.800931	0.809084
6409	Q8MLV1	Lateral (2)	0.800931	0.809084
6389	Q8IRH5	Lateral (2)	0.780944	0.800144
6379	Q8IRD2	Lateral (2)	0.772644	0.771143
6308	Q9VWB8	Lateral (2)	0.787571	0.797584
6235	Q9V475	Lateral (2)	0.750182	0.776236
6151	Q8INM3	Lateral (2)	0.800325	0.7746
32	E5DK16	Lateral (2)	0.612983	0.612983
53	Q7K1Q6	Ventral Tl10B (3)	0.676292	NaN
13103	Q9VR17	Ventral Tl10B (3)	0.537745	NaN
13077	Q9VPR5	Ventral Tl10B (3)	0.532672	NaN
3421	M9NFQ5	Ventral Tl10B (3)	0.660069	NaN
3740	M9PDR2	Ventral Tl10B (3)	0.532102	NaN
3829	M9PFS8	Ventral Tl10B (3)	0.686382	NaN
7403	Q9VBP5	Ventral Tl10B (3)	0.487691	NaN
9796	Q9VWP5	Ventral Tl10B (3)	0.613891	NaN
9816	X2JFP6	Ventral Tl10B (3)	0.663806	NaN
12727	Q9V9T4	Ventral Tl10B (3)	0.52404	NaN
109	Q961V3	Ventral Tl10B (3)	0.698205	NaN
13405	X2JE07	Ventral Tl10B (3)	0.697133	NaN
13381	Q9W335	Ventral Tl10B (3)	0.628567	NaN
310	A0A0B4K6W1	Ventral Tl10B (3)	0.725064	NaN
336	A0A0B4KHR8	Ventral Tl10B (3)	0.749309	NaN
346	Q5U0Y0	Ventral Tl10B (3)	0.749517	NaN
384	A0A0B4K7S0	Ventral Tl10B (3)	0.720039	NaN
572	Q9N693	Ventral Tl10B (3)	0.74242	NaN
766	Q9VNF7	Ventral Tl10B (3)	0.687623	NaN
899	A0A0B4KHE9	Ventral Tl10B (3)	0.739216	NaN
989	A0A0B4KHY6	Ventral Tl10B (3)	0.700112	NaN
998	A0A0B4KHY8	Ventral Tl10B (3)	0.726791	NaN
1009	A0A0B4KHZ0	Ventral Tl10B (3)	0.73158	NaN
1158	A0A0B4LFL2	Ventral Tl10B (3)	0.700846	NaN
1204	Q8MLW2	Ventral Tl10B (3)	0.731241	NaN
1227	A0A0B4LGF9	Ventral Tl10B (3)	0.717308	NaN
1249	Q24560	Ventral Tl10B (3)	0.684037	NaN
1353	A0A0C4DHD4	Ventral Tl10B (3)	0.376844	NaN
1427	A0T1Z5	Ventral Tl10B (3)	0.353345	NaN
1429	A0T1Z5	Ventral Tl10B (3)	0.699048	NaN
1486	A1Z6I7	Ventral Tl10B (3)	0.703678	NaN
1503	A1Z713	Ventral Tl10B (3)	0.718506	NaN
1543	A1Z898	Ventral Tl10B (3)	0.729525	NaN
1642	A1Z9S6	Ventral Tl10B (3)	0.708974	NaN
1665	Q8IFW6	Ventral Tl10B (3)	0.728226	NaN
1798	A1ZBW7	Ventral Tl10B (3)	0.609778	NaN
1883	A4V2K7	Ventral Tl10B (3)	0.696294	NaN
1897	A4V3G8	Ventral Tl10B (3)	0.477916	NaN
1898	A4V3G8	Ventral Tl10B (3)	0.719931	NaN
1905	A4V3G8	Ventral Tl10B (3)	0.728921	NaN
2108	A8JV07	Ventral Tl10B (3)	0.727004	NaN
2173	B5RJS0	Ventral Tl10B (3)	0.697659	NaN
2251	B7Z002	Ventral Tl10B (3)	0.608612	NaN
2258	B7Z002	Ventral Tl10B (3)	0.680073	NaN
2484	Q9I7R0	Ventral Tl10B (3)	0.710209	NaN
2515	Q59E36	Ventral Tl10B (3)	0.67043	NaN
2676	M9PIA6	Ventral Tl10B (3)	0.727197	NaN
2695	Q8MRH9	Ventral Tl10B (3)	0.684817	NaN
2797	E1JJN9	Ventral Tl10B (3)	0.731732	NaN
2803	E1JJN9	Ventral Tl10B (3)	0.731328	NaN
2837	E2QC61	Ventral Tl10B (3)	0.739962	NaN
2986	M9NDX8	Ventral Tl10B (3)	0.708265	NaN
3007	H9XVM7	Ventral Tl10B (3)	0.74115	NaN
3041	L0MPS3	Ventral Tl10B (3)	0.727701	NaN
3071	X2JDP6	Ventral Tl10B (3)	0.736937	NaN
3232	M9PDV1	Ventral Tl10B (3)	0.654591	NaN
3305	M9NDR2	Ventral Tl10B (3)	0.721254	NaN
3342	M9NEA7	Ventral Tl10B (3)	0.735855	NaN
3435	M9NFQ5	Ventral Tl10B (3)	0.739213	NaN
3453	M9NFV3	Ventral Tl10B (3)	0.679301	NaN
3686	M9PD27	Ventral Tl10B (3)	0.711298	NaN
3709	M9PIH3	Ventral Tl10B (3)	0.731696	NaN
3738	M9PDR2	Ventral Tl10B (3)	0.683186	NaN
3777	Q7KUD6	Ventral Tl10B (3)	0.705266	NaN
3778	Q7KUD6	Ventral Tl10B (3)	0.710307	NaN
3861	Q7KTV5	Ventral Tl10B (3)	0.494731	NaN
3880	Q7KTV5	Ventral Tl10B (3)	0.736654	NaN
3920	M9PG22	Ventral Tl10B (3)	0.683308	NaN
3936	M9PG50	Ventral Tl10B (3)	0.542665	NaN
4095	Q9VVW6	Ventral Tl10B (3)	0.73376	NaN
4115	Q9VPB2	Ventral Tl10B (3)	0.732629	NaN
4145	M9W963	Ventral Tl10B (3)	0.752973	NaN
4306	O76906	Ventral Tl10B (3)	0.689961	NaN
4349	X2JD55	Ventral Tl10B (3)	0.73531	NaN
4365	X2JD55	Ventral Tl10B (3)	0.687954	NaN
4469	P13060	Ventral Tl10B (3)	0.737065	NaN
4600	P28668	Ventral Tl10B (3)	0.724634	NaN
4636	P34739	Ventral Tl10B (3)	0.742395	NaN
4806	P81900	Ventral Tl10B (3)	0.707972	NaN
4865	Q04652	Ventral Tl10B (3)	0.668885	NaN
4903	Q0E8J0	Ventral Tl10B (3)	0.695493	NaN
5010	Q24276	Ventral Tl10B (3)	0.721221	NaN
5076	Q24574	Ventral Tl10B (3)	0.713334	NaN
5089	Q24574	Ventral Tl10B (3)	0.692956	NaN
5233	Q59E33	Ventral Tl10B (3)	0.702753	NaN
5406	Q7JXU4	Ventral Tl10B (3)	0.570652	NaN
5410	Q7JYV7	Ventral Tl10B (3)	0.7346	NaN
5529	Q7K3D4	Ventral Tl10B (3)	0.549009	NaN
5589	Q7K4W1	Ventral Tl10B (3)	0.493741	NaN
5631	Q7KM15	Ventral Tl10B (3)	0.3612	NaN
5729	Q7KRW8	Ventral Tl10B (3)	0.717188	NaN
5836	Q7KU82	Ventral Tl10B (3)	0.714554	NaN
5963	Q7YZ99	Ventral Tl10B (3)	0.732288	NaN
5994	Q7YZA2	Ventral Tl10B (3)	0.664189	NaN
6025	Q9VLL3	Ventral Tl10B (3)	0.732098	NaN
6072	Q9VDD2	Ventral Tl10B (3)	0.753461	NaN
6252	Q8IPG9	Ventral Tl10B (3)	0.748647	NaN
6383	Q8IRG6	Ventral Tl10B (3)	0.747194	NaN
6469	Q8MSC4	Ventral Tl10B (3)	0.74483	NaN
6615	Q8T4A9	Ventral Tl10B (3)	0.731727	NaN
6616	Q8T4A9	Ventral Tl10B (3)	0.68302	NaN
6628	Q8T8T9	Ventral Tl10B (3)	0.71477	NaN
6633	Q8T9H0	Ventral Tl10B (3)	0.704247	NaN
6943	Q9V3E9	Ventral Tl10B (3)	0.723475	NaN
7131	Q9V474	Ventral Tl10B (3)	0.553964	NaN
7185	Q9V6K1	Ventral Tl10B (3)	0.735777	NaN
7239	Q9VA00	Ventral Tl10B (3)	0.710324	NaN
7242	Q9VA18	Ventral Tl10B (3)	0.70009	NaN
7279	Q9VAM5	Ventral Tl10B (3)	0.710796	NaN
7450	Q9VBX1	Ventral Tl10B (3)	0.533921	NaN
7454	Q9VBX4	Ventral Tl10B (3)	0.675229	NaN
7502	Q9VC45	Ventral Tl10B (3)	0.75407	NaN
7531	Q9VC60	Ventral Tl10B (3)	0.75265	NaN
7549	Q9VC60	Ventral Tl10B (3)	0.703573	NaN
7550	Q9VC60	Ventral Tl10B (3)	0.703573	NaN
7566	Q9VC63	Ventral Tl10B (3)	0.650902	NaN
7638	Q9VCH1	Ventral Tl10B (3)	0.408397	NaN
7839	Q9VEJ1	Ventral Tl10B (3)	0.539923	NaN
7863	Q9VEP9	Ventral Tl10B (3)	0.710241	NaN
7864	Q9VEP9	Ventral Tl10B (3)	0.720259	NaN
7969	Q9VGA4	Ventral Tl10B (3)	0.728811	NaN
7994	Q9VGI8	Ventral Tl10B (3)	0.686936	NaN
8005	Q9VGL0	Ventral Tl10B (3)	0.713344	NaN
8132	Q9VHR5	Ventral Tl10B (3)	0.738397	NaN
8286	Q9VJ12	Ventral Tl10B (3)	0.691574	NaN
8322	Q9VJ87	Ventral Tl10B (3)	0.730008	NaN
8497	Q9VKV5	Ventral Tl10B (3)	0.725556	NaN
8512	Q9VL18	Ventral Tl10B (3)	0.712444	NaN
8523	Q9VL69	Ventral Tl10B (3)	0.743793	NaN
8524	Q9VL71	Ventral Tl10B (3)	0.684774	NaN
8606	Q9VM69	Ventral Tl10B (3)	0.729775	NaN
8636	Q9VME5	Ventral Tl10B (3)	0.695989	NaN
8637	Q9VME5	Ventral Tl10B (3)	0.696231	NaN
8650	Q9VME5	Ventral Tl10B (3)	0.72605	NaN
8658	Q9VME5	Ventral Tl10B (3)	0.662917	NaN
8835	Q9VNI5	Ventral Tl10B (3)	0.717449	NaN
8860	Q9VP05	Ventral Tl10B (3)	0.716493	NaN
8865	Q9VP05	Ventral Tl10B (3)	0.558921	NaN
8958	Q9VPR5	Ventral Tl10B (3)	0.630483	NaN
9036	Q9VQK5	Ventral Tl10B (3)	0.724503	NaN
9041	Q9VQK5	Ventral Tl10B (3)	0.741646	NaN
9132	Q9VRP5	Ventral Tl10B (3)	0.724143	NaN
9257	Q9VT61	Ventral Tl10B (3)	0.740865	NaN
9287	Q9VTC1	Ventral Tl10B (3)	0.698288	NaN
9309	Q9VTG0	Ventral Tl10B (3)	0.730984	NaN
9563	Q9VV60	Ventral Tl10B (3)	0.720393	NaN
9569	Q9VV74	Ventral Tl10B (3)	0.741616	NaN
9626	Q9VVG9	Ventral Tl10B (3)	0.73043	NaN
9794	Q9VWP5	Ventral Tl10B (3)	0.683906	NaN
9867	X2JKQ8	Ventral Tl10B (3)	0.719973	NaN
10006	X2JEW2	Ventral Tl10B (3)	0.705921	NaN
10039	X2JEX7	Ventral Tl10B (3)	0.633577	NaN
10136	Q9VZ08	Ventral Tl10B (3)	0.67404	NaN
10203	Q9VZY0	Ventral Tl10B (3)	0.668895	NaN
10280	Q9W0X8	Ventral Tl10B (3)	0.667671	NaN
10287	Q9W108	Ventral Tl10B (3)	0.594848	NaN
10301	Q9W148	Ventral Tl10B (3)	0.700684	NaN
10302	Q9W148	Ventral Tl10B (3)	0.704921	NaN
10321	Q9W1A8	Ventral Tl10B (3)	0.678413	NaN
10343	Q9W1H4	Ventral Tl10B (3)	0.729156	NaN
10423	Q9W244	Ventral Tl10B (3)	0.657968	NaN
10424	Q9W244	Ventral Tl10B (3)	0.657968	NaN
10430	Q9W281	Ventral Tl10B (3)	0.759406	NaN
10486	Q9W2U7	Ventral Tl10B (3)	0.707049	NaN
10509	Q9W2U7	Ventral Tl10B (3)	0.731165	NaN
10531	Q9W335	Ventral Tl10B (3)	0.706145	NaN
10871	Q9W579	Ventral Tl10B (3)	0.739339	NaN
10880	Q9W5E2	Ventral Tl10B (3)	0.482808	NaN
10898	Q9W5R5	Ventral Tl10B (3)	0.642759	NaN
10981	Q9XZ21	Ventral Tl10B (3)	0.738856	NaN
11020	Q9XZ34	Ventral Tl10B (3)	0.721727	NaN
11030	Q9Y095	Ventral Tl10B (3)	0.634111	NaN
11112	Q9Y162	Ventral Tl10B (3)	0.721122	NaN
11294	A0A0B4JCV4	Ventral Tl10B (3)	0.322294	NaN
11332	A0A0B4K6G6	Ventral Tl10B (3)	0.710439	NaN
11402	Q9N693	Ventral Tl10B (3)	0.725893	NaN
11404	Q9N693	Ventral Tl10B (3)	0.726564	NaN
11611	A1Z9S6	Ventral Tl10B (3)	0.713376	NaN
11641	Q9W061	Ventral Tl10B (3)	0.51225	NaN
11726	B7Z002	Ventral Tl10B (3)	0.746085	NaN
11730	B7Z002	Ventral Tl10B (3)	0.636785	NaN
11956	M9NFQ5	Ventral Tl10B (3)	0.648396	NaN
11993	M9PBL3	Ventral Tl10B (3)	0.702134	NaN
12097	O16043	Ventral Tl10B (3)	0.717042	NaN
12142	X2JD55	Ventral Tl10B (3)	0.732004	NaN
12180	P23572	Ventral Tl10B (3)	0.709954	NaN
12184	P25171	Ventral Tl10B (3)	0.74033	NaN
12188	P25823	Ventral Tl10B (3)	0.711297	NaN
12197	P34739	Ventral Tl10B (3)	0.741772	NaN
12269	Q0E9B5	Ventral Tl10B (3)	0.744094	NaN
12481	Q7PLL6	Ventral Tl10B (3)	0.722918	NaN
12494	Q9VLL3	Ventral Tl10B (3)	0.492401	NaN
12520	Q8INM3	Ventral Tl10B (3)	0.654641	NaN
12528	Q8INM3	Ventral Tl10B (3)	0.323709	NaN
12546	Q8INM3	Ventral Tl10B (3)	0.712789	NaN
12580	Q8MRI4	Ventral Tl10B (3)	0.558518	NaN
12582	Q8MSC4	Ventral Tl10B (3)	0.553312	NaN
12587	Q8MZI3	Ventral Tl10B (3)	0.600494	NaN
13342	Q9W1G7	Ventral Tl10B (3)	0.737039	NaN
13272	Q9VY91	Ventral Tl10B (3)	0.707869	NaN
13259	X2JKP3	Ventral Tl10B (3)	0.697229	NaN
13217	Q9VW73	Ventral Tl10B (3)	0.741019	NaN
13173	Q9VUC1	Ventral Tl10B (3)	0.677418	NaN
13141	Q9VT61	Ventral Tl10B (3)	0.450336	NaN
13118	Q9VRP5	Ventral Tl10B (3)	0.718665	NaN
13104	Q9VR17	Ventral Tl10B (3)	0.395378	NaN
13094	Q9VQK5	Ventral Tl10B (3)	0.715263	NaN
13053	Q9VNI3	Ventral Tl10B (3)	0.560367	NaN
12936	Q9VJ87	Ventral Tl10B (3)	0.714703	NaN
12874	Q9VGP4	Ventral Tl10B (3)	0.720607	NaN
10841	Q9W526	Ventral Tl10B (3)	0.693788	NaN
7505	Q9VC45	Ventral Tl10B (3)	0.675309	NaN
4456	X2JCP8	Ventral Tl10B (3)	0.696457	NaN
3383	M9NEW2	Ventral Tl10B (3)	0.720966	NaN
3382	M9NEW2	Ventral Tl10B (3)	0.720966	NaN
2339	B7Z0D7	Ventral Tl10B (3)	0.711089	NaN
2338	B7Z0D7	Ventral Tl10B (3)	0.711089	NaN
11930	M9NDR2	Ventral Tl10B (3)	0.710018	NaN
13331	Q9W0L7	Ventral Tl10B (3)	0.737062	NaN
987	A0A0B4KHY6	Ventral Tl10B (3)	0.725059	NaN
11806	E1JHA4	Ventral Tl10B (3)	0.727014	NaN
11427	E1JH52	Ventral Tl10B (3)	0.562478	NaN
10201	Q9VZY0	Ventral Tl10B (3)	0.696788	NaN
9890	X2JKP3	Ventral Tl10B (3)	0.710392	NaN
9365	Q9VU34	Ventral Tl10B (3)	0.713234	NaN
8649	Q9VME5	Ventral Tl10B (3)	0.665125	NaN
7972	Q9VGF8	Ventral Tl10B (3)	0.529128	NaN
7780	Q9VDP8	Ventral Tl10B (3)	0.695055	NaN
7779	Q9VDP8	Ventral Tl10B (3)	0.678635	NaN
7579	Q9VC94	Ventral Tl10B (3)	0.701385	NaN
6659	Q94546	Ventral Tl10B (3)	0.715792	NaN
6373	Q8IRD2	Ventral Tl10B (3)	0.700005	NaN
6367	Q8IRB5	Ventral Tl10B (3)	0.656202	NaN
6346	Q8IRB5	Ventral Tl10B (3)	0.68169	NaN
5605	Q7K738	Ventral Tl10B (3)	0.680462	NaN
5169	Q32KD2	Ventral Tl10B (3)	0.692925	NaN
5163	Q2PE14	Ventral Tl10B (3)	0.547205	NaN
2892	E4NKG1	Ventral Tl10B (3)	0.621629	NaN
1710	A1ZAW3	Ventral Tl10B (3)	0.584404	NaN
1160	A0A0B4LFL2	Ventral Tl10B (3)	0.705824	NaN
12186	P25171	Ventral Tl10B (3)	0.723389	NaN
12862	Q9VFE6	Ventral Tl10B (3)	0.691044	NaN
464	A0A0B4K863	Ventral Tl10B (3)	0.677626	NaN
74	A0A0B4JCV4	Ventral spn27A (4)	NaN	0.687144
245	Q9VG78	Ventral spn27A (4)	NaN	0.52866
3982	M9PGP7	Ventral spn27A (4)	NaN	0.517514
4235	O46043	Ventral spn27A (4)	NaN	0.670288
4648	P34739	Ventral spn27A (4)	NaN	0.661452
6912	Q9U5L1	Ventral spn27A (4)	NaN	0.507816
7191	Q9V6U8	Ventral spn27A (4)	NaN	0.520067
8087	Q9VHC8	Ventral spn27A (4)	NaN	0.679736
8475	Q9VKP5	Ventral spn27A (4)	NaN	0.68868
9296	Q9VTE2	Ventral spn27A (4)	NaN	0.697469
9342	Q9VTT3	Ventral spn27A (4)	NaN	0.547392
9537	Q9VUX1	Ventral spn27A (4)	NaN	0.683032
11651	A4V3G8	Ventral spn27A (4)	NaN	0.64438
12365	Q7JQH9	Ventral spn27A (4)	NaN	0.50807
12408	Q7K4G8	Ventral spn27A (4)	NaN	0.679974
12773	Q9VBU7	Ventral spn27A (4)	NaN	0.543032
12781	Q9VC08	Ventral spn27A (4)	NaN	0.524139
13205	Q9VVG9	Ventral spn27A (4)	NaN	0.482472
1893	A4V3G8	Ventral spn27A (4)	NaN	0.645758
140	E1JJ72	Ventral spn27A (4)	NaN	0.722952
158	A0A126GUS7	Ventral spn27A (4)	NaN	0.461579
237	Q9VG78	Ventral spn27A (4)	NaN	0.344544
244	Q9VG78	Ventral spn27A (4)	NaN	0.71534
404	A0A0B4LFF8	Ventral spn27A (4)	NaN	0.488811
449	A0A0B4K833	Ventral spn27A (4)	NaN	0.69384
462	A0A0B4K863	Ventral spn27A (4)	NaN	0.660879
534	A0A0B4KEK1	Ventral spn27A (4)	NaN	0.175701
585	Q9N693	Ventral spn27A (4)	NaN	0.69323
590	A0A0B4KFA4	Ventral spn27A (4)	NaN	0.682098
1172	A0A0B4LFQ2	Ventral spn27A (4)	NaN	0.702892
1035	A0A0B4KI59	Ventral spn27A (4)	NaN	0.361684
782	A0A0B4KG81	Ventral spn27A (4)	NaN	0.663524
789	A0A0B4KG83	Ventral spn27A (4)	NaN	0.705559
790	A0A0B4KG83	Ventral spn27A (4)	NaN	0.705559
826	A0A0B4KGL6	Ventral spn27A (4)	NaN	0.704274
880	A0A0B4KH28	Ventral spn27A (4)	NaN	0.728736
917	A0A0B4LIK5	Ventral spn27A (4)	NaN	0.723297
967	A0A0B4KHR6	Ventral spn27A (4)	NaN	0.685123
976	A0A0B4KHU6	Ventral spn27A (4)	NaN	0.717249
1001	A0A0B4KHZ0	Ventral spn27A (4)	NaN	0.719955
1010	A0A0B4KHZ0	Ventral spn27A (4)	NaN	0.740582
1318	A0A0B4LHR3	Ventral spn27A (4)	NaN	0.659022
1328	Q8IMF8	Ventral spn27A (4)	NaN	0.688857
1387	Q960D3	Ventral spn27A (4)	NaN	0.74166
1479	A1Z6I7	Ventral spn27A (4)	NaN	0.726714
1480	A1Z6I7	Ventral spn27A (4)	NaN	0.742476
1521	A1Z7L1	Ventral spn27A (4)	NaN	0.617732
1522	A1Z7L1	Ventral spn27A (4)	NaN	0.617732
1537	A1Z803	Ventral spn27A (4)	NaN	0.694565
1544	A1Z898	Ventral spn27A (4)	NaN	0.746965
1794	A1ZBW6	Ventral spn27A (4)	NaN	0.737985
1934	A4V488	Ventral spn27A (4)	NaN	0.728853
1988	O61380	Ventral spn27A (4)	NaN	0.746503
2142	A8JV18	Ventral spn27A (4)	NaN	0.660084
2271	B7Z002	Ventral spn27A (4)	NaN	0.670844
2320	B7Z067	Ventral spn27A (4)	NaN	0.699001
2359	B7Z0I7	Ventral spn27A (4)	NaN	0.707955
2398	B7Z0I8	Ventral spn27A (4)	NaN	0.749781
2413	B7Z0I8	Ventral spn27A (4)	NaN	0.671829
2424	B7Z0I8	Ventral spn27A (4)	NaN	0.697977
2499	X2J9A4	Ventral spn27A (4)	NaN	0.689739
2575	E1JGK6	Ventral spn27A (4)	NaN	0.406324
2660	M9PE12	Ventral spn27A (4)	NaN	0.638508
2684	M9PIA6	Ventral spn27A (4)	NaN	0.737468
2800	E1JJN9	Ventral spn27A (4)	NaN	0.667508
2836	E2QC61	Ventral spn27A (4)	NaN	0.728565
2945	H0RNK7	Ventral spn27A (4)	NaN	0.60122
2955	H1UUB1	Ventral spn27A (4)	NaN	0.677027
3023	L0MLQ9	Ventral spn27A (4)	NaN	0.703875
3033	L0MLQ9	Ventral spn27A (4)	NaN	0.401781
3064	M9MRD9	Ventral spn27A (4)	NaN	0.331003
3182	M9NCM6	Ventral spn27A (4)	NaN	0.695986
3183	M9NCM6	Ventral spn27A (4)	NaN	0.695986
3312	M9NDR2	Ventral spn27A (4)	NaN	0.532652
3341	M9NEA7	Ventral spn27A (4)	NaN	0.681779
13550	X2JD55	Ventral spn27A (4)	NaN	0.729792
13524	A0A0B4KHS6	Ventral spn27A (4)	NaN	0.734621
13470	Q9XZ34	Ventral spn27A (4)	NaN	0.412003
13385	Q9W363	Ventral spn27A (4)	NaN	0.672586
13384	Q9W363	Ventral spn27A (4)	NaN	0.543521
13308	Q9VZ60	Ventral spn27A (4)	NaN	0.735466
13220	Q9VWD0	Ventral spn27A (4)	NaN	0.351464
12947	Q9VK06	Ventral spn27A (4)	NaN	0.617707
12733	Q9V9U3	Ventral spn27A (4)	NaN	0.687479
12722	Q9V6K1	Ventral spn27A (4)	NaN	0.412006
12684	Q9V3H9	Ventral spn27A (4)	NaN	0.711696
12663	Q9I7T7	Ventral spn27A (4)	NaN	0.747177
12612	Q94517	Ventral spn27A (4)	NaN	0.572441
12607	Q8SY69	Ventral spn27A (4)	NaN	0.729567
12584	Q8MSC4	Ventral spn27A (4)	NaN	0.713019
12544	Q8INM3	Ventral spn27A (4)	NaN	0.728149
12523	Q8INM3	Ventral spn27A (4)	NaN	0.550827
12496	Q9VLL3	Ventral spn27A (4)	NaN	0.70107
12493	Q9VLL3	Ventral spn27A (4)	NaN	0.743896
12393	Q7K1Q6	Ventral spn27A (4)	NaN	0.335725
12218	P46863	Ventral spn27A (4)	NaN	0.740425
12192	P29746	Ventral spn27A (4)	NaN	0.621232
12183	P25171	Ventral spn27A (4)	NaN	0.719727
11890	M9MS15	Ventral spn27A (4)	NaN	0.133563
11855	Q8IRC1	Ventral spn27A (4)	NaN	0.532298
11850	E4NKG1	Ventral spn27A (4)	NaN	0.743238
11816	M9PE12	Ventral spn27A (4)	NaN	0.3636
11747	B7Z0B0	Ventral spn27A (4)	NaN	0.734972
11650	A4V3G8	Ventral spn27A (4)	NaN	0.679186
11503	A0A0B4KHZ0	Ventral spn27A (4)	NaN	0.544759
11494	A0A0B4KHU6	Ventral spn27A (4)	NaN	0.697228
11415	A8DY98	Ventral spn27A (4)	NaN	0.559799
11407	A0A0B4KFA4	Ventral spn27A (4)	NaN	0.674937
11259	X2JE45	Ventral spn27A (4)	NaN	0.344746
11102	Q9Y145	Ventral spn27A (4)	NaN	0.743684
11022	Q9XZ53	Ventral spn27A (4)	NaN	0.331011
10896	Q9W5R5	Ventral spn27A (4)	NaN	0.698931
10674	Q9W3S4	Ventral spn27A (4)	NaN	0.683949
10567	Q9W394	Ventral spn27A (4)	NaN	0.751796
10566	Q9W394	Ventral spn27A (4)	NaN	0.751796
10553	Q9W363	Ventral spn27A (4)	NaN	0.672586
10521	Q9W2V7	Ventral spn27A (4)	NaN	0.746971
10309	Q9W198	Ventral spn27A (4)	NaN	0.729826
10170	Q9VZE6	Ventral spn27A (4)	NaN	0.753288
10159	Q9VZ60	Ventral spn27A (4)	NaN	0.677437
10121	X2JEU3	Ventral spn27A (4)	NaN	0.375175
10108	Q9VYY7	Ventral spn27A (4)	NaN	0.404142
9899	Q9VXG1	Ventral spn27A (4)	NaN	0.754074
9707	Q9VWD5	Ventral spn27A (4)	NaN	0.702478
9653	Q9VVX5	Ventral spn27A (4)	NaN	0.354516
9567	Q9VV74	Ventral spn27A (4)	NaN	0.719025
9501	Q9VUM0	Ventral spn27A (4)	NaN	0.711952
9307	Q9VTG0	Ventral spn27A (4)	NaN	0.695693
9297	Q9VTE2	Ventral spn27A (4)	NaN	0.652064
9295	Q9VTE2	Ventral spn27A (4)	NaN	0.742491
9248	Q9VT38	Ventral spn27A (4)	NaN	0.725634
9245	Q9VT00	Ventral spn27A (4)	NaN	0.32289
9075	Q9VR17	Ventral spn27A (4)	NaN	0.750065
9067	Q9VQZ8	Ventral spn27A (4)	NaN	0.6947
9054	Q9VQS4	Ventral spn27A (4)	NaN	0.282576
9026	Q9VQF5	Ventral spn27A (4)	NaN	0.705122
9012	Q9VQD8	Ventral spn27A (4)	NaN	0.410561
8951	Q9VPP5	Ventral spn27A (4)	NaN	0.706347
8949	Q9VPN5	Ventral spn27A (4)	NaN	0.710165
8899	Q9VPC0	Ventral spn27A (4)	NaN	0.747699
8891	Q9VP77	Ventral spn27A (4)	NaN	0.702694
8837	Q9VNI5	Ventral spn27A (4)	NaN	0.722909
8836	Q9VNI5	Ventral spn27A (4)	NaN	0.637291
8824	Q9VNH6	Ventral spn27A (4)	NaN	0.555265
8747	Q9VND7	Ventral spn27A (4)	NaN	0.697684
8552	Q9VL89	Ventral spn27A (4)	NaN	0.485511
8476	Q9VKP5	Ventral spn27A (4)	NaN	0.685766
8474	Q9VKP5	Ventral spn27A (4)	NaN	0.655514
8468	Q9VKK1	Ventral spn27A (4)	NaN	0.453186
8444	Q9VKJ1	Ventral spn27A (4)	NaN	0.730141
8404	Q9VK43	Ventral spn27A (4)	NaN	0.738652
8285	Q9VJ12	Ventral spn27A (4)	NaN	0.724886
8284	Q9VJ12	Ventral spn27A (4)	NaN	0.730373
8283	Q9VJ12	Ventral spn27A (4)	NaN	0.737387
8282	Q9VJ12	Ventral spn27A (4)	NaN	0.737387
8281	Q9VJ12	Ventral spn27A (4)	NaN	0.682944
8279	Q9VJ12	Ventral spn27A (4)	NaN	0.684744
8266	Q9VIZ3	Ventral spn27A (4)	NaN	0.735101
8229	Q9VIK6	Ventral spn27A (4)	NaN	0.722333
8209	Q9VIE6	Ventral spn27A (4)	NaN	0.73154
8196	Q9VID9	Ventral spn27A (4)	NaN	0.734952
8159	Q9VI21	Ventral spn27A (4)	NaN	0.666602
8109	Q9VHJ3	Ventral spn27A (4)	NaN	0.677366
8078	Q9VHC7	Ventral spn27A (4)	NaN	0.69991
8029	Q9VGW7	Ventral spn27A (4)	NaN	0.616516
8024	Q9VGR1	Ventral spn27A (4)	NaN	0.710311
8009	Q9VGL0	Ventral spn27A (4)	NaN	0.724147
8008	Q9VGL0	Ventral spn27A (4)	NaN	0.705997
7940	Q9VG03	Ventral spn27A (4)	NaN	0.708029
7860	Q9VEN9	Ventral spn27A (4)	NaN	0.71462
7823	Q9VE79	Ventral spn27A (4)	NaN	0.72729
7785	Q9VDP8	Ventral spn27A (4)	NaN	0.704289
7765	Q9VDK7	Ventral spn27A (4)	NaN	0.712586
7763	Q9VDG2	Ventral spn27A (4)	NaN	0.747226
7692	Q9VCU8	Ventral spn27A (4)	NaN	0.388131
7679	Q9VCP0	Ventral spn27A (4)	NaN	0.55209
7532	Q9VC60	Ventral spn27A (4)	NaN	0.294791
7471	Q9VC08	Ventral spn27A (4)	NaN	0.395907
7317	Q9VAW1	Ventral spn27A (4)	NaN	0.718168
7235	Q9V9Z8	Ventral spn27A (4)	NaN	0.744057
7218	Q9V9U3	Ventral spn27A (4)	NaN	0.753127
7201	Q9V7W9	Ventral spn27A (4)	NaN	0.707783
7165	Q9V4P1	Ventral spn27A (4)	NaN	0.545538
6971	Q9V3H9	Ventral spn27A (4)	NaN	0.738895
6821	Q961D9	Ventral spn27A (4)	NaN	0.700769
6741	Q95RR6	Ventral spn27A (4)	NaN	0.598533
6714	Q94883	Ventral spn27A (4)	NaN	0.706366
6706	Q94546	Ventral spn27A (4)	NaN	0.724065
6649	Q94524	Ventral spn27A (4)	NaN	0.746347
6614	Q8T4A9	Ventral spn27A (4)	NaN	0.322963
6464	Q9VQV2	Ventral spn27A (4)	NaN	0.716209
6282	Q8IQ95	Ventral spn27A (4)	NaN	0.634176
6207	Q8INM3	Ventral spn27A (4)	NaN	0.702921
6102	Q8IMX8	Ventral spn27A (4)	NaN	0.708001
6013	Q9VLL3	Ventral spn27A (4)	NaN	0.498072
6006	Q86BI3	Ventral spn27A (4)	NaN	0.695486
5876	Q9W4C4	Ventral spn27A (4)	NaN	0.713076
5855	Q9VT60	Ventral spn27A (4)	NaN	0.688083
5722	Q7KRW8	Ventral spn27A (4)	NaN	0.74281
5680	Q7KN62	Ventral spn27A (4)	NaN	0.654586
5643	Q7KMH9	Ventral spn27A (4)	NaN	0.243577
5571	Q7K4G8	Ventral spn27A (4)	NaN	0.539847
5565	Q7K4G8	Ventral spn27A (4)	NaN	0.691591
5447	Q7K0S5	Ventral spn27A (4)	NaN	0.321539
5446	Q7K0L8	Ventral spn27A (4)	NaN	0.746656
5384	Q7JVY2	Ventral spn27A (4)	NaN	0.747154
5383	Q7JVY2	Ventral spn27A (4)	NaN	0.731199
5379	Q7JVY2	Ventral spn27A (4)	NaN	0.731458
5375	Q7JVY2	Ventral spn27A (4)	NaN	0.720422
5349	Q7JRH5	Ventral spn27A (4)	NaN	0.716172
5265	Q5LJZ2	Ventral spn27A (4)	NaN	0.655065
5253	Q5LJZ2	Ventral spn27A (4)	NaN	0.40618
4983	Q24050	Ventral spn27A (4)	NaN	0.713459
4978	Q23976	Ventral spn27A (4)	NaN	0.351052
4964	Q0KHZ9	Ventral spn27A (4)	NaN	0.685292
4893	Q0E8E5	Ventral spn27A (4)	NaN	0.730112
4877	Q05913	Ventral spn27A (4)	NaN	0.390273
4837	P98159	Ventral spn27A (4)	NaN	0.754715
4835	P92177	Ventral spn27A (4)	NaN	0.672302
4728	X2JCS6	Ventral spn27A (4)	NaN	0.732424
4616	P29746	Ventral spn27A (4)	NaN	0.388628
4443	P07664	Ventral spn27A (4)	NaN	0.726933
4416	P05389	Ventral spn27A (4)	NaN	0.725693
4415	P05389	Ventral spn27A (4)	NaN	0.747568
4362	X2JD55	Ventral spn27A (4)	NaN	0.674287
4355	X2JD55	Ventral spn27A (4)	NaN	0.717713
4334	Q4ABE3	Ventral spn27A (4)	NaN	0.719976
4316	O77430	Ventral spn27A (4)	NaN	0.757069
4179	O16043	Ventral spn27A (4)	NaN	0.739425
4056	M9PHL0	Ventral spn27A (4)	NaN	0.58564
3877	Q7KTV5	Ventral spn27A (4)	NaN	0.732892
3838	M9PI89	Ventral spn27A (4)	NaN	0.669806
3775	Q7KUD6	Ventral spn27A (4)	NaN	0.526436
3769	M9PEJ1	Ventral spn27A (4)	NaN	0.763215
3687	M9PD27	Ventral spn27A (4)	NaN	0.747223
3647	M9PCX3	Ventral spn27A (4)	NaN	0.72799
3633	M9PCN6	Ventral spn27A (4)	NaN	0.715548
3560	M9PBL3	Ventral spn27A (4)	NaN	0.724422
3513	M9PB85	Ventral spn27A (4)	NaN	0.695161
3496	M9PB68	Ventral spn27A (4)	NaN	0.553874
3427	M9NFQ5	Ventral spn27A (4)	NaN	0.37375
17	A0A023GQ99	Ventral spn27A (4)	NaN	0.71216
655	A0A0B4KFB8	Ventral spn27A (4)	NaN	0.721449
2559	D3DMM4	Ventral spn27A (4)	NaN	0.714045
13134	Q9VSD7	Ventral spn27A (4)	NaN	0.694338
12008	M9PD16	Ventral spn27A (4)	NaN	0.745
10697	X2JIQ5	Ventral spn27A (4)	NaN	0.733616
10204	Q9VZY0	Ventral spn27A (4)	NaN	0.739792
9566	Q9VV74	Ventral spn27A (4)	NaN	0.726049
8856	Q9VP05	Ventral spn27A (4)	NaN	0.724171
8528	Q9VL71	Ventral spn27A (4)	NaN	0.684309
7962	Q9VG69	Ventral spn27A (4)	NaN	0.749487
7733	Q9VDD2	Ventral spn27A (4)	NaN	0.705693
7022	Q9V3V6	Ventral spn27A (4)	NaN	0.755853
6708	Q94546	Ventral spn27A (4)	NaN	0.739415
5850	Q7KUA4	Ventral spn27A (4)	NaN	0.709077
4882	Q05913	Ventral spn27A (4)	NaN	0.729606
4499	P17210	Ventral spn27A (4)	NaN	0.71653
4492	P15348	Ventral spn27A (4)	NaN	0.731584
4431	X2JEX8	Ventral spn27A (4)	NaN	0.754708
4094	Q9VVW6	Ventral spn27A (4)	NaN	0.694149
643	A8DY98	Ventral spn27A (4)	NaN	0.713375
78	A0A0B4JCV4	Ventral spn27A (4)	NaN	0.676866
1976	X2JDY7	Ventral Tl10B spn27A (5)	0.682998	0.704208
6270	Q8IQ71	Ventral Tl10B spn27A (5)	0.614586	0.614842
4495	P15348	Ventral Tl10B spn27A (5)	0.709963	0.715439
2517	Q59E36	Ventral Tl10B spn27A (5)	0.719907	0.703831
51	Q7K1Q6	Ventral Tl10B spn27A (5)	0.361417	0.377165
183	Q59DW9	Ventral Tl10B spn27A (5)	0.71479	0.732926
642	A0A0B4KF92	Ventral Tl10B spn27A (5)	0.705051	0.709718
819	A8WHL4	Ventral Tl10B spn27A (5)	0.730928	0.751817
911	A0A0B4LIK5	Ventral Tl10B spn27A (5)	0.625712	0.641038
1097	A0A0B4LF14	Ventral Tl10B spn27A (5)	0.702901	0.708308
1194	Q8MLW2	Ventral Tl10B spn27A (5)	0.723252	0.693234
1293	A0A0B4LH25	Ventral Tl10B spn27A (5)	0.689559	0.698834
1494	A1Z6Z7	Ventral Tl10B spn27A (5)	0.557152	0.542693
1571	A1Z8U7	Ventral Tl10B spn27A (5)	0.721333	0.73162
1790	A1ZBW6	Ventral Tl10B spn27A (5)	0.541388	0.563241
2405	B7Z0I8	Ventral Tl10B spn27A (5)	0.683053	0.708995
3167	M9NCM6	Ventral Tl10B spn27A (5)	0.694293	0.703393
3632	M9PCN6	Ventral Tl10B spn27A (5)	0.706558	0.70502
3753	Q7KM04	Ventral Tl10B spn27A (5)	0.710256	0.715505
4359	X2JD55	Ventral Tl10B spn27A (5)	0.571187	0.596948
4708	P41375	Ventral Tl10B spn27A (5)	0.69369	0.706932
4924	Q0E8X6	Ventral Tl10B spn27A (5)	0.699112	0.698893
5073	Q24560	Ventral Tl10B spn27A (5)	0.731876	0.694564
5387	Q7JW03	Ventral Tl10B spn27A (5)	0.73333	0.721536
5641	Q7KMH9	Ventral Tl10B spn27A (5)	0.716831	0.736082
5728	Q7KRW8	Ventral Tl10B spn27A (5)	0.715684	0.71999
5835	Q7KU82	Ventral Tl10B spn27A (5)	0.708463	0.70918
5980	Q7YZ99	Ventral Tl10B spn27A (5)	0.504158	0.545137
6177	Q8INM3	Ventral Tl10B spn27A (5)	0.745654	0.725929
6502	Q8MT78	Ventral Tl10B spn27A (5)	0.674805	0.661582
6518	Q8SWW4	Ventral Tl10B spn27A (5)	0.28857	0.28517
7042	Q9V3X4	Ventral Tl10B spn27A (5)	0.389165	0.409476
7412	Q9VBP9	Ventral Tl10B spn27A (5)	0.706107	0.717453
7706	Q9VCX1	Ventral Tl10B spn27A (5)	0.74998	0.752545
7955	Q9VG59	Ventral Tl10B spn27A (5)	0.622935	0.638439
8413	Q9VK58	Ventral Tl10B spn27A (5)	0.711827	0.703694
8551	X2J5E8	Ventral Tl10B spn27A (5)	0.708955	0.695973
8918	Q9VPI9	Ventral Tl10B spn27A (5)	0.689716	0.695452
9280	Q9VT61	Ventral Tl10B spn27A (5)	0.701046	0.732488
9437	Q9VU84	Ventral Tl10B spn27A (5)	0.706695	0.705141
9530	Q9VUR2	Ventral Tl10B spn27A (5)	0.719406	0.716391
9605	Q9VVC9	Ventral Tl10B spn27A (5)	0.30462	0.275866
9717	X2JG50	Ventral Tl10B spn27A (5)	0.700178	0.708743
9976	Q9VY91	Ventral Tl10B spn27A (5)	0.730178	0.751348
10242	Q9W0A9	Ventral Tl10B spn27A (5)	0.704045	0.708575
11125	Q9Y1T2	Ventral Tl10B spn27A (5)	0.702524	0.701702
11599	A1Z8U7	Ventral Tl10B spn27A (5)	0.721333	0.73162
12114	Q7KW02	Ventral Tl10B spn27A (5)	0.705773	0.726189
12407	Q7K486	Ventral Tl10B spn27A (5)	0.696026	0.689301
12559	Q8IQ95	Ventral Tl10B spn27A (5)	0.668355	0.676811
13003	Q9VME5	Ventral Tl10B spn27A (5)	0.689135	0.685103
13021	Q9VN21	Ventral Tl10B spn27A (5)	0.557758	0.564243
13311	Q9VZD8	Ventral Tl10B spn27A (5)	0.700209	0.672997
13450	Q9W542	Ventral Tl10B spn27A (5)	0.410863	0.374305
13255	Q9VX98	Ventral Tl10B spn27A (5)	0.741445	0.750456
13020	Q9VN21	Ventral Tl10B spn27A (5)	0.740027	0.740306
12976	Q9VL71	Ventral Tl10B spn27A (5)	0.684774	0.692659
12458	Q7KU82	Ventral Tl10B spn27A (5)	0.674357	0.699939
12139	Q4ABE3	Ventral Tl10B spn27A (5)	0.704168	0.735004
11614	A1Z9S6	Ventral Tl10B spn27A (5)	0.382346	0.385032
11583	A1Z6Z7	Ventral Tl10B spn27A (5)	0.692609	0.693588
10443	Q9W2I2	Ventral Tl10B spn27A (5)	0.689579	0.685165
10227	Q9W062	Ventral Tl10B spn27A (5)	0.741662	0.739718
9718	X2JG50	Ventral Tl10B spn27A (5)	0.706228	0.715963
9607	Q9VVC9	Ventral Tl10B spn27A (5)	0.673873	0.693286
9542	Q9VUY9	Ventral Tl10B spn27A (5)	0.73817	0.750924
9529	Q9VUR2	Ventral Tl10B spn27A (5)	0.673637	0.658822
9358	Q9VTZ4	Ventral Tl10B spn27A (5)	0.742512	0.755696
9201	Q9VSE2	Ventral Tl10B spn27A (5)	0.716511	0.730981
8731	Q9VN82	Ventral Tl10B spn27A (5)	0.729027	0.741168
8511	Q9VL18	Ventral Tl10B spn27A (5)	0.724202	0.745906
8174	Q9VID9	Ventral Tl10B spn27A (5)	0.245592	0.305459
7814	Q9VE54	Ventral Tl10B spn27A (5)	0.742287	0.689886
7478	Q9VC10	Ventral Tl10B spn27A (5)	0.393751	0.397865
7205	Q9V9R2	Ventral Tl10B spn27A (5)	0.293742	0.339034
6745	Q95RX5	Ventral Tl10B spn27A (5)	0.689818	0.685515
6503	Q8MZI3	Ventral Tl10B spn27A (5)	0.552661	0.565542
6338	Q8IRB5	Ventral Tl10B spn27A (5)	0.660445	0.659513
6081	Q8IH00	Ventral Tl10B spn27A (5)	0.7157	0.651459
5954	Q7YZ99	Ventral Tl10B spn27A (5)	0.375748	0.408618
5830	Q7KU82	Ventral Tl10B spn27A (5)	0.679125	0.704418
5696	Q7KQM6	Ventral Tl10B spn27A (5)	0.690858	0.70624
5639	Q7KMH9	Ventral Tl10B spn27A (5)	0.754759	0.760802
5235	Q59E33	Ventral Tl10B spn27A (5)	0.6881	0.697411
4965	Q0KHZ9	Ventral Tl10B spn27A (5)	0.698162	0.690586
4799	P61851	Ventral Tl10B spn27A (5)	0.724228	0.738401
4635	P34739	Ventral Tl10B spn27A (5)	0.723575	0.744617
3907	Q7KTV5	Ventral Tl10B spn27A (5)	0.70302	0.737243
3716	M9PD95	Ventral Tl10B spn27A (5)	0.731838	0.734826
3213	M9NCM6	Ventral Tl10B spn27A (5)	0.590631	0.591333
2987	M9NDX8	Ventral Tl10B spn27A (5)	0.7035	0.716212
1827	A2VEG3	Ventral Tl10B spn27A (5)	0.746566	0.759549
1572	A1Z8X0	Ventral Tl10B spn27A (5)	0.747618	0.758569
1570	A1Z8U7	Ventral Tl10B spn27A (5)	0.729399	0.737518
1355	A0A0C4DHE6	Ventral Tl10B spn27A (5)	0.667981	0.690373
1220	A0A0B4LGB0	Ventral Tl10B spn27A (5)	0.702285	0.699733
1098	A0A0B4LF14	Ventral Tl10B spn27A (5)	0.729135	0.732303
975	A0A0B4KHU6	Ventral Tl10B spn27A (5)	0.741032	0.755028
904	A0A0B4LIK5	Ventral Tl10B spn27A (5)	0.667072	0.699697
652	A0A0B4KFB8	Ventral Tl10B spn27A (5)	0.734875	0.745255
236	Q9VG78	Ventral Tl10B spn27A (5)	0.721604	0.720314
169	Q9VNA1	Ventral Tl10B spn27A (5)	0.592598	0.593792
9177	Q9VS50	Ventral Tl10B spn27A (5)	0.554466	0.59392
5795	Q7KTI0	Ventral Tl10B spn27A (5)	0.652861	0.696927
5731	Q9VB04	Ventral Tl10B spn27A (5)	0.22252	0.407724
4962	Q0KHZ9	Ventral Tl10B spn27A (5)	0.210907	0.363814
3954	M9PG76	Ventral Tl10B spn27A (5)	0.473118	0.557469
3039	L0MPS3	Ventral Tl10B spn27A (5)	0.311693	0.359782
2785	E1JJM8	Ventral Tl10B spn27A (5)	0.500305	0.555472
2728	E1JIJ9	Ventral Tl10B spn27A (5)	0.635949	0.666027
9659	X2JGV8	Ventral Tl10B spn27A (5)	0.649925	0.677007
13187	Q9VUN9	Ventral Tl10B spn27A (5)	0.392309	0.438019
35	E5DK16	Ventral Tl10B spn27A (5)	0.30686	0.380291
7519	Q9VC54	Ventral Tl10B spn27A (5)	0.539311	0.544579
7520	Q9VC54	Ventral Tl10B spn27A (5)	0.539311	0.544579
5130	Q29QE1	Ventral Tl10B spn27A (5)	0.660882	0.6788
3101	M9MRT6	Ventral Tl10B spn27A (5)	0.453225	0.505738
2252	B7Z002	Ventral Tl10B spn27A (5)	0.666519	0.670069
2093	A8JUY0	Ventral Tl10B spn27A (5)	0.637827	0.692591
10636	X2JE07	Ventral Tl10B spn27A (5)	0.668085	0.661726
12760	Q9VB05	Ventral Tl10B spn27A (5)	0.529258	0.443682
1982	L0MLL1	Ventral Tl10B spn27A (5)	0.495389	0.536985
12934	Q9VJ30	Ventral Tl10B spn27A (5)	0.355008	0.331412
10980	Q9XZ21	Ventral Tl10B spn27A (5)	0.540982	0.436709
8496	Q9VKV5	Ventral Tl10B spn27A (5)	0.714228	0.677953
8089	Q9VHC8	Ventral Tl10B spn27A (5)	0.660116	0.626778
7066	Q9V406	Ventral Tl10B spn27A (5)	0.361115	0.333587
5908	Q7PLI0	Ventral Tl10B spn27A (5)	0.376969	0.330948
5581	Q7K4L8	Ventral Tl10B spn27A (5)	0.349987	0.131121
5041	Q24478	Ventral Tl10B spn27A (5)	0.373256	0.350258
3655	M9PG46	Ventral Tl10B spn27A (5)	0.530654	0.48212
3250	M9ND37	Ventral Tl10B spn27A (5)	0.667227	0.610208
1195	Q8MLW2	Ventral Tl10B spn27A (5)	0.412002	0.192895
402	A0A0B4LFF8	Dorsal + Lateral (6)	0.718781	0.722983
1675	Q8IFW6	Dorsal + Lateral (6)	0.588824	0.588824
6855	Q9I7F7	Dorsal + Lateral (6)	0.67164	0.67164
7918	Q9VFQ3	Dorsal + Lateral (6)	0.670503	0.659181
8278	Q9VJ12	Dorsal + Lateral (6)	0.619845	0.767633
8363	Q9VJQ4	Dorsal + Lateral (6)	0.804925	0.820728
10864	Q9W550	Dorsal + Lateral (6)	0.686147	0.686147
4470	P13468	Dorsal + Lateral (6)	0.75163	0.794696
4111	M9PIC3	Dorsal + Lateral (6)	0.774537	0.760774
10865	Q9W550	Dorsal + Lateral (6)	0.686147	0.686147
3006	H8F4V5	Dorsal + Lateral (6)	0.822678	0.822624
5007	X2JKU5	Dorsal + Lateral (6)	0.820936	0.828367
4615	P29746	Dorsal + Lateral (6)	0.729807	0.579875
2436	B7Z0I8	Dorsal + Lateral (6)	0.746704	0.733785
370	A0A0B4K7G4	Dorsal + Lateral (6)	0.77782	0.762728
954	A0A0B4KHP8	Dorsal + Lateral (6)	0.791502	0.692461
7441	Q9VBU7	Dorsal + Lateral (6)	0.801589	0.599706
7507	Q9VC45	Dorsal + Lateral (6)	0.798774	0.762799
10927	Q9XYZ4	Dorsal + Lateral (6)	0.784042	0.765706
12168	P15619	Dorsal + Lateral (6)	0.744543	0.709764
13070	Q9VPM5	Dorsal + Lateral (6)	0.810688	0.772833
13071	Q9VPM5	Dorsal + Lateral (6)	0.801337	0.772786
13266	Q9VXW2	Dorsal + Lateral (6)	0.781734	0.674669
13156	Q9VU02	Dorsal + Lateral (6)	0.802459	0.762242
2182	B7YZQ1	Dorsal + Lateral (6)	0.816163	0.768237
2996	M9NDX8	Dorsal + Lateral (6)	0.796916	0.790735
3340	M9NE97	Dorsal + Lateral (6)	0.837912	0.654053
3359	M9NEL1	Dorsal + Lateral (6)	0.825974	0.793143
1650	A1Z9S6	Dorsal + Lateral (6)	0.669641	0.778668
11652	A4V3G8	Dorsal + Lateral (6)	0.663132	0.663132
11008	Q9XZ34	Dorsal + Lateral (6)	0.758829	0.72649
1894	A4V3G8	Dorsal + Lateral (6)	0.650118	0.650118
2134	Q9W3W1	Dorsal + Lateral (6)	0.798174	0.802495
2422	B7Z0I8	Dorsal + Lateral (6)	0.651783	0.651783
3246	M9ND37	Dorsal + Lateral (6)	0.792675	0.806001
3873	Q7KTV5	Dorsal + Lateral (6)	0.762331	0.627329
4665	P35600	Dorsal + Lateral (6)	0.667023	0.667023
9194	Q9VSC5	Dorsal + Lateral (6)	0.606998	0.606998
9429	Q9VU76	Dorsal + Lateral (6)	0.706079	0.758562
10510	Q9W2U7	Dorsal + Lateral (6)	0.632441	0.632441
10548	Q9W363	Dorsal + Lateral (6)	0.813635	0.676615
56	A0A0B4JCV4	Dorsal + Lateral (6)	0.864939	0.855626
67	A0A0B4JCV4	Dorsal + Lateral (6)	0.81087	0.803387
206	A0A0B4K680	Dorsal + Lateral (6)	0.874249	0.868051
235	A0A0B4K6D6	Dorsal + Lateral (6)	0.846108	0.82515
296	A0A126GUM8	Dorsal + Lateral (6)	0.848883	0.855453
440	A0A0B4K7Y7	Dorsal + Lateral (6)	0.839963	0.846792
484	A0A0B4K863	Dorsal + Lateral (6)	0.802714	0.820788
872	Q9VC89	Dorsal + Lateral (6)	0.854986	0.855956
955	A0A0B4KHP8	Dorsal + Lateral (6)	0.844021	0.848009
958	A0A0B4KHP8	Dorsal + Lateral (6)	0.819404	0.792753
1117	A0A0B4LFF9	Dorsal + Lateral (6)	0.828945	0.826495
1153	A0A0B4LFJ4	Dorsal + Lateral (6)	0.858067	0.854235
1180	A0A0B4LGV3	Dorsal + Lateral (6)	0.820256	0.811571
1302	A0A0B4LH99	Dorsal + Lateral (6)	0.875376	0.878789
1348	A0A0C4DHC2	Dorsal + Lateral (6)	0.818586	0.853949
1457	A1Z6H4	Dorsal + Lateral (6)	0.854245	0.867749
1713	A1ZAW3	Dorsal + Lateral (6)	0.828883	0.821022
1935	A4V4A1	Dorsal + Lateral (6)	0.796015	0.764804
2014	M9PBL6	Dorsal + Lateral (6)	0.864754	0.854713
2350	B7Z0E2	Dorsal + Lateral (6)	0.848216	0.865868
2553	D0Z760	Dorsal + Lateral (6)	0.833641	0.833634
2614	E1JHE1	Dorsal + Lateral (6)	0.495026	0.495026
2682	M9PIA6	Dorsal + Lateral (6)	0.847943	0.872845
2819	E1JJS2	Dorsal + Lateral (6)	0.819179	0.676514
2931	G4LTX1	Dorsal + Lateral (6)	0.830564	0.82306
2965	M9NDX8	Dorsal + Lateral (6)	0.737189	0.737189
3112	M9MS02	Dorsal + Lateral (6)	0.830931	0.856097
3220	M9NCX1	Dorsal + Lateral (6)	0.850394	0.845453
3353	M9NED8	Dorsal + Lateral (6)	0.854801	0.861693
3360	M9NEL1	Dorsal + Lateral (6)	0.822643	0.824113
3407	M9NFA7	Dorsal + Lateral (6)	0.852909	0.848098
3638	M9PCQ8	Dorsal + Lateral (6)	0.801651	0.819783
3808	M9PF24	Dorsal + Lateral (6)	0.837191	0.853856
3815	M9PFF0	Dorsal + Lateral (6)	0.740841	0.725514
4181	O16043	Dorsal + Lateral (6)	0.820652	0.826194
4255	O46067	Dorsal + Lateral (6)	0.840163	0.850207
4303	O76906	Dorsal + Lateral (6)	0.834165	0.824818
4345	X2JC82	Dorsal + Lateral (6)	0.747987	0.726821
4352	X2JD55	Dorsal + Lateral (6)	0.852386	0.852033
4464	P11455	Dorsal + Lateral (6)	0.859282	0.861126
4557	P23128	Dorsal + Lateral (6)	0.820627	0.827404
4706	X2JFR6	Dorsal + Lateral (6)	0.825298	0.831251
4795	X2JC55	Dorsal + Lateral (6)	0.777169	0.785281
4875	Q05913	Dorsal + Lateral (6)	0.72589	0.747299
4977	Q23973	Dorsal + Lateral (6)	0.829632	0.825732
5034	Q24371	Dorsal + Lateral (6)	0.820358	0.804886
5127	Q27896	Dorsal + Lateral (6)	0.740914	0.875665
5168	Q32KD2	Dorsal + Lateral (6)	0.840992	0.845339
5292	Q6IHY4	Dorsal + Lateral (6)	0.862541	0.857047
5424	Q7JZN0	Dorsal + Lateral (6)	0.849582	0.857193
5653	Q7KMI3	Dorsal + Lateral (6)	0.847835	0.849425
5739	Q9VBI4	Dorsal + Lateral (6)	0.697751	0.697751
5762	Q7KSP6	Dorsal + Lateral (6)	0.833913	0.829072
6028	Q9VLL3	Dorsal + Lateral (6)	0.773121	0.809365
6167	Q8INM3	Dorsal + Lateral (6)	0.848712	0.858506
6331	Q8IR33	Dorsal + Lateral (6)	0.850534	0.720709
6404	Q8MLQ5	Dorsal + Lateral (6)	0.830907	0.845915
6457	Q8MRI4	Dorsal + Lateral (6)	0.830935	0.862938
6570	Q8SY19	Dorsal + Lateral (6)	0.826088	0.834111
6734	Q9W1N1	Dorsal + Lateral (6)	0.721758	0.855461
6854	Q9GYU8	Dorsal + Lateral (6)	0.82859	0.821388
6942	Q9V3E9	Dorsal + Lateral (6)	0.819509	0.823014
7299	Q9VAN8	Dorsal + Lateral (6)	0.850067	0.853929
7415	Q9VBU7	Dorsal + Lateral (6)	0.861083	0.864032
7440	Q9VBU7	Dorsal + Lateral (6)	0.806309	0.817609
7572	Q9VC64	Dorsal + Lateral (6)	0.536807	0.536807
7751	Q9VDE5	Dorsal + Lateral (6)	0.853126	0.878902
7922	Q9VFT4	Dorsal + Lateral (6)	0.849851	0.862945
7990	Q9VGI8	Dorsal + Lateral (6)	0.804407	0.810516
8013	Q9VGL0	Dorsal + Lateral (6)	0.851496	0.864214
8106	Q9VHJ3	Dorsal + Lateral (6)	0.714326	0.845258
8205	Q9VID9	Dorsal + Lateral (6)	0.807426	0.82183
8466	Q9VKK1	Dorsal + Lateral (6)	0.823963	0.838251
8657	Q9VME5	Dorsal + Lateral (6)	0.831484	0.83107
9126	Q9VRM6	Dorsal + Lateral (6)	0.767848	0.761971
9129	Q9VRN3	Dorsal + Lateral (6)	0.694492	0.821029
9229	Q9VSW7	Dorsal + Lateral (6)	0.67883	0.702312
9322	Q9VTL5	Dorsal + Lateral (6)	0.769893	0.7925
9440	Q9VU88	Dorsal + Lateral (6)	0.798042	0.822376
9519	Q9VUQ9	Dorsal + Lateral (6)	0.697257	0.820988
9769	X2JFQ1	Dorsal + Lateral (6)	0.834373	0.859486
9860	Q9VX95	Dorsal + Lateral (6)	0.799079	0.802226
9939	Q9VXU8	Dorsal + Lateral (6)	0.855624	0.855502
9956	Q9VXZ8	Dorsal + Lateral (6)	0.705703	0.83993
9997	Q9VYA4	Dorsal + Lateral (6)	0.868271	0.869312
10083	Q9VYW4	Dorsal + Lateral (6)	0.80856	0.812953
10250	Q9W0G4	Dorsal + Lateral (6)	0.782393	0.756162
10372	Q9W1K4	Dorsal + Lateral (6)	0.846887	0.85499
10529	Q9W335	Dorsal + Lateral (6)	0.827654	0.848923
10655	X2JE07	Dorsal + Lateral (6)	0.845851	0.847045
10747	Q9W437	Dorsal + Lateral (6)	0.844446	0.839282
10773	Q9W4C3	Dorsal + Lateral (6)	0.855603	0.851636
10860	Q9W542	Dorsal + Lateral (6)	0.869492	0.875349
10971	Q9XZ21	Dorsal + Lateral (6)	0.823001	0.843394
11060	Q9Y114	Dorsal + Lateral (6)	0.851057	0.857649
11261	X2JEN2	Dorsal + Lateral (6)	0.772574	0.767843
11592	A1Z898	Dorsal + Lateral (6)	0.816258	0.839672
11856	Q8IRC1	Dorsal + Lateral (6)	0.791253	0.813617
11873	L0MLQ9	Dorsal + Lateral (6)	0.628213	0.628213
12119	Q7KW02	Dorsal + Lateral (6)	0.863544	0.860996
12320	Q27896	Dorsal + Lateral (6)	0.740914	0.875665
12403	Q7K2X8	Dorsal + Lateral (6)	0.833891	0.843171
12637	Q960D3	Dorsal + Lateral (6)	0.834857	0.831989
12799	Q9VCH1	Dorsal + Lateral (6)	0.729476	0.851902
12875	Q9VGW7	Dorsal + Lateral (6)	0.792098	0.832767
12992	Q9VM69	Dorsal + Lateral (6)	0.781011	0.776933
13119	Q9VRP5	Dorsal + Lateral (6)	0.84025	0.841362
13124	Q9VRV1	Dorsal + Lateral (6)	0.761407	0.764844
13219	Q9VWD0	Dorsal + Lateral (6)	0.830683	0.839708
13458	Q9XZ21	Dorsal + Lateral (6)	0.812168	0.797647
13563	P91634	Dorsal + Lateral (6)	0.806513	0.798035
13475	Q9Y113	Dorsal + Lateral (6)	0.847256	0.855576
13346	Q9W1H5	Dorsal + Lateral (6)	0.849598	0.712896
13170	Q9VU88	Dorsal + Lateral (6)	0.798042	0.822376
13120	Q9VRP5	Dorsal + Lateral (6)	0.84025	0.841362
13113	Q9VRM6	Dorsal + Lateral (6)	0.775525	0.784959
12912	Q9VID9	Dorsal + Lateral (6)	0.74679	0.767401
12836	Q9VDY1	Dorsal + Lateral (6)	0.847269	0.848445
12692	Q9V3V9	Dorsal + Lateral (6)	0.83124	0.855116
12501	Q86BS3	Dorsal + Lateral (6)	0.721434	0.819101
12359	Q7JQU9	Dorsal + Lateral (6)	0.846445	0.853851
12204	P35600	Dorsal + Lateral (6)	0.744848	0.759847
11937	M9NE89	Dorsal + Lateral (6)	0.801585	0.826667
11859	F6J1D0	Dorsal + Lateral (6)	0.821979	0.807385
11708	B7YZQ1	Dorsal + Lateral (6)	0.605233	0.605233
11487	A0A0B4KHP8	Dorsal + Lateral (6)	0.602968	0.749506
11071	Q9Y118	Dorsal + Lateral (6)	0.788347	0.799076
11059	Q9Y114	Dorsal + Lateral (6)	0.859006	0.863074
10941	Q9XZ06	Dorsal + Lateral (6)	0.620975	0.77446
10855	Q9W541	Dorsal + Lateral (6)	0.802128	0.799274
10756	Q9W464	Dorsal + Lateral (6)	0.813762	0.812053
10722	Q9W423	Dorsal + Lateral (6)	0.613292	0.613292
10594	Q9W3D2	Dorsal + Lateral (6)	0.84794	0.832087
10504	Q9W2U7	Dorsal + Lateral (6)	0.706349	0.706349
10294	Q9W147	Dorsal + Lateral (6)	0.848053	0.832333
10086	Q9VYX1	Dorsal + Lateral (6)	0.655228	0.655228
10081	Q9VYW4	Dorsal + Lateral (6)	0.862655	0.856341
9985	Q9VY97	Dorsal + Lateral (6)	0.829703	0.715232
9943	Q9VXW2	Dorsal + Lateral (6)	0.859958	0.834929
9889	X2JKP3	Dorsal + Lateral (6)	0.699029	0.699029
9828	Q9VWV2	Dorsal + Lateral (6)	0.875679	0.870463
9768	X2JFQ1	Dorsal + Lateral (6)	0.868352	0.876717
9460	Q9VUB8	Dorsal + Lateral (6)	0.83179	0.844168
9417	Q9VU43	Dorsal + Lateral (6)	0.849633	0.852852
9256	Q9VT61	Dorsal + Lateral (6)	0.714744	0.754498
9196	Q9VSC5	Dorsal + Lateral (6)	0.849199	0.862602
9127	Q9VRM6	Dorsal + Lateral (6)	0.762704	0.764476
8661	Q9VME5	Dorsal + Lateral (6)	0.814279	0.842046
8563	Q9VLD6	Dorsal + Lateral (6)	0.86368	0.87356
8206	Q9VID9	Dorsal + Lateral (6)	0.807426	0.824916
8183	Q9VID9	Dorsal + Lateral (6)	0.688593	0.688593
8085	Q9VHC8	Dorsal + Lateral (6)	0.815551	0.84462
8004	Q9VGJ9	Dorsal + Lateral (6)	0.862208	0.859473
7937	Q9VG01	Dorsal + Lateral (6)	0.785025	0.816624
7826	Q9VEA5	Dorsal + Lateral (6)	0.70347	0.837897
7669	Q9VCK0	Dorsal + Lateral (6)	0.859209	0.858632
7533	Q9VC60	Dorsal + Lateral (6)	0.831834	0.823624
7435	Q9VBU7	Dorsal + Lateral (6)	0.851926	0.866385
7400	Q9VBN5	Dorsal + Lateral (6)	0.792504	0.802998
7156	Q9V4P1	Dorsal + Lateral (6)	0.85328	0.868608
6878	Q9I7T7	Dorsal + Lateral (6)	0.855611	0.871104
6844	Q9GQR5	Dorsal + Lateral (6)	0.853501	0.846624
6661	Q94546	Dorsal + Lateral (6)	0.70611	0.70611
6458	Q8MRI4	Dorsal + Lateral (6)	0.835949	0.867767
6454	Q8MRI4	Dorsal + Lateral (6)	0.851957	0.857785
6400	Q8IRW8	Dorsal + Lateral (6)	0.841844	0.862305
6265	Q8IQ71	Dorsal + Lateral (6)	0.730574	0.852609
6042	Q86BS3	Dorsal + Lateral (6)	0.467369	0.467369
5831	Q7KU82	Dorsal + Lateral (6)	0.710149	0.815737
5742	Q7KSB7	Dorsal + Lateral (6)	0.861441	0.863835
5719	Q8IMG3	Dorsal + Lateral (6)	0.855141	0.862826
5525	Q7K3D4	Dorsal + Lateral (6)	0.85537	0.860047
5415	Q7JZ37	Dorsal + Lateral (6)	0.833819	0.848504
5282	Q5U0X8	Dorsal + Lateral (6)	0.747558	0.73103
5152	Q29QE1	Dorsal + Lateral (6)	0.80383	0.830961
5075	Q24572	Dorsal + Lateral (6)	0.727045	0.860652
5006	Q24185	Dorsal + Lateral (6)	0.83492	0.836997
4911	Q0E8J0	Dorsal + Lateral (6)	0.860709	0.867865
4809	P83094	Dorsal + Lateral (6)	0.864524	0.876288
4756	P49906	Dorsal + Lateral (6)	0.79462	0.821598
4559	P23128	Dorsal + Lateral (6)	0.847449	0.836323
4493	P15348	Dorsal + Lateral (6)	0.823611	0.831675
4405	P05084	Dorsal + Lateral (6)	0.825264	0.83906
4346	X2JC82	Dorsal + Lateral (6)	0.857504	0.852916
4328	O97132	Dorsal + Lateral (6)	0.848318	0.85427
4272	O61305	Dorsal + Lateral (6)	0.837275	0.866215
4230	O46043	Dorsal + Lateral (6)	0.583643	0.483032
3917	M9PFZ1	Dorsal + Lateral (6)	0.816075	0.810887
3812	M9PF85	Dorsal + Lateral (6)	0.817382	0.832877
3789	M9PEU5	Dorsal + Lateral (6)	0.867715	0.864756
3460	M9NG39	Dorsal + Lateral (6)	0.85226	0.863016
3393	M9NF67	Dorsal + Lateral (6)	0.876278	0.871814
3358	M9NEL1	Dorsal + Lateral (6)	0.818658	0.823813
3267	M9NDA1	Dorsal + Lateral (6)	0.735932	0.749971
3118	M9MS15	Dorsal + Lateral (6)	0.837711	0.849505
3004	M9MQH9	Dorsal + Lateral (6)	0.595031	0.72253
2963	M9NDX8	Dorsal + Lateral (6)	0.841047	0.865208
2870	Q9VQ76	Dorsal + Lateral (6)	0.849931	0.855739
2700	E1JIB9	Dorsal + Lateral (6)	0.861903	0.873237
2680	M9PIA6	Dorsal + Lateral (6)	0.815539	0.821336
2567	D3PFH9	Dorsal + Lateral (6)	0.584631	0.584631
2442	B7Z0I8	Dorsal + Lateral (6)	0.871728	0.865105
2326	B7Z098	Dorsal + Lateral (6)	0.82865	0.84437
1946	A8DYB0	Dorsal + Lateral (6)	0.719604	0.719604
1876	A4V2K7	Dorsal + Lateral (6)	0.786557	0.788162
1601	A1Z987	Dorsal + Lateral (6)	0.64178	0.64178
1400	A0A126BEE6	Dorsal + Lateral (6)	0.875736	0.841713
1326	A0A0B4LJ12	Dorsal + Lateral (6)	0.770109	0.764091
1223	A0A0B4LGB7	Dorsal + Lateral (6)	0.817129	0.82557
1176	A0A0B4LFQ2	Dorsal + Lateral (6)	0.857446	0.874261
1149	A0A0B4LFJ4	Dorsal + Lateral (6)	0.761986	0.791719
983	Q9V9X8	Dorsal + Lateral (6)	0.692105	0.835467
956	A0A0B4KHP8	Dorsal + Lateral (6)	0.851163	0.852553
941	A0A0B4KHJ5	Dorsal + Lateral (6)	0.843864	0.849775
550	A0A0B4KEM3	Dorsal + Lateral (6)	0.859716	0.86225
447	A0A0B4K7Z5	Dorsal + Lateral (6)	0.838168	0.844842
410	A0A0B4K7U3	Dorsal + Lateral (6)	0.453572	0.60869
278	A0A0B4KHY2	Dorsal + Lateral (6)	0.847234	0.855232
219	A0A0B4K6B8	Dorsal + Lateral (6)	0.8625	0.863412
68	A0A0B4JCV4	Dorsal + Lateral (6)	0.796238	0.789902
63	A0A0B4JCV4	Dorsal + Lateral (6)	0.855147	0.864705
19	A0A023GQ99	Dorsal + Lateral (6)	0.803286	0.815546
4539	P21187	Dorsal + Lateral (6)	0.65205	0.833345
3304	M9NDR2	Dorsal + Lateral (6)	0.613403	0.796868
12040	Q7KTV5	Dorsal + Lateral (6)	0.760773	0.81339
11720	B7YZZ9	Dorsal + Lateral (6)	0.460232	0.672153
10805	Q9W4M7	Dorsal + Lateral (6)	0.444853	0.662205
10214	Q9W032	Dorsal + Lateral (6)	0.636477	0.823012
6545	Q8SX89	Dorsal + Lateral (6)	0.738777	0.783197
6392	Q8IRH5	Dorsal + Lateral (6)	0.573023	0.745828
5560	Q7K4C7	Dorsal + Lateral (6)	0.611368	0.791842
746	A0A0B4KGP0	Dorsal + Lateral (6)	0.801442	0.835195
412	A0A0B4K7U3	Dorsal + Lateral (6)	0.805075	0.818271
1139	A0A0B4LFE1	Dorsal + Ventral Tl10B (7)	0.708897	NaN
13319	Q9VZY0	Dorsal + Ventral Tl10B (7)	0.698337	NaN
8651	Q9VME5	Dorsal + Ventral Tl10B (7)	0.699649	NaN
6554	Q8SXI2	Dorsal + Ventral Tl10B (7)	0.745663	NaN
4210	O18332	Dorsal + Ventral Tl10B (7)	0.680418	NaN
4072	M9PHN1	Dorsal + Ventral Tl10B (7)	0.705454	NaN
3989	M9PGW8	Dorsal + Ventral Tl10B (7)	0.743923	NaN
4173	O02193	Dorsal + Ventral Tl10B (7)	0.698131	NaN
1795	A1ZBW7	Dorsal + Ventral Tl10B (7)	0.762055	NaN
12979	Q9VL89	Dorsal + Ventral Tl10B (7)	0.757782	NaN
10707	Q9W3Z4	Dorsal + Ventral Tl10B (7)	0.654414	NaN
2189	B7YZV0	Dorsal + Ventral Tl10B (7)	0.748158	NaN
5156	Q2PDP6	Dorsal + Ventral Tl10B (7)	0.72932	NaN
6074	Q9VDD2	Dorsal + Ventral Tl10B (7)	0.598976	NaN
6426	Q8MMD2	Dorsal + Ventral Tl10B (7)	0.738736	NaN
8418	Q9VK59	Dorsal + Ventral Tl10B (7)	0.752693	NaN
8554	Q9VL89	Dorsal + Ventral Tl10B (7)	0.748039	NaN
8627	X2J786	Dorsal + Ventral Tl10B (7)	0.725616	NaN
8923	Q9VPL5	Dorsal + Ventral Tl10B (7)	0.592991	NaN
9288	Q9VTC1	Dorsal + Ventral Tl10B (7)	0.751813	NaN
8662	Q9VME5	Dorsal + Ventral Tl10B (7)	0.789495	NaN
8041	Q9VH76	Dorsal + Ventral Tl10B (7)	0.758052	NaN
7874	Q9VEV3	Dorsal + Ventral Tl10B (7)	0.74713	NaN
7718	Q9VD81	Dorsal + Ventral Tl10B (7)	0.793495	NaN
7487	Q9VC36	Dorsal + Ventral Tl10B (7)	0.765917	NaN
7219	Q9V9U3	Dorsal + Ventral Tl10B (7)	0.757276	NaN
7180	Q9V677	Dorsal + Ventral Tl10B (7)	0.719892	NaN
6940	Q9V3E7	Dorsal + Ventral Tl10B (7)	0.772839	NaN
6825	Q961G1	Dorsal + Ventral Tl10B (7)	0.788216	NaN
6770	Q960D3	Dorsal + Ventral Tl10B (7)	0.775463	NaN
9179	Q9VS50	Dorsal + Ventral Tl10B (7)	0.791243	NaN
6349	Q8IRB5	Dorsal + Ventral Tl10B (7)	0.746929	NaN
6262	Q8IPZ5	Dorsal + Ventral Tl10B (7)	0.793232	NaN
6179	Q8INM3	Dorsal + Ventral Tl10B (7)	0.785572	NaN
5923	Q7PLL6	Dorsal + Ventral Tl10B (7)	0.766348	NaN
5306	Q6NQZ5	Dorsal + Ventral Tl10B (7)	0.772748	NaN
5298	Q6NQY9	Dorsal + Ventral Tl10B (7)	0.756251	NaN
5215	Q4V6F7	Dorsal + Ventral Tl10B (7)	0.631884	NaN
5162	Q2PE14	Dorsal + Ventral Tl10B (7)	0.771561	NaN
5096	Q24574	Dorsal + Ventral Tl10B (7)	0.7707	NaN
5095	Q24574	Dorsal + Ventral Tl10B (7)	0.7707	NaN
5052	Q24478	Dorsal + Ventral Tl10B (7)	0.780305	NaN
4960	Q0KHZ9	Dorsal + Ventral Tl10B (7)	0.774626	NaN
4948	Q0KHR4	Dorsal + Ventral Tl10B (7)	0.636619	NaN
4925	Q0E8X6	Dorsal + Ventral Tl10B (7)	0.619458	NaN
4898	Q0E8J0	Dorsal + Ventral Tl10B (7)	0.771741	NaN
9212	Q9VSK2	Dorsal + Ventral Tl10B (7)	0.761205	NaN
4188	O16043	Dorsal + Ventral Tl10B (7)	0.776448	NaN
9433	Q9VU84	Dorsal + Ventral Tl10B (7)	0.760351	NaN
4152	N0D8I3	Dorsal + Ventral Tl10B (7)	0.759806	NaN
9843	Q9VX34	Dorsal + Ventral Tl10B (7)	0.775896	NaN
3995	M9PGW8	Dorsal + Ventral Tl10B (7)	0.775824	NaN
10005	X2JEW2	Dorsal + Ventral Tl10B (7)	0.769987	NaN
3539	Q9VIV0	Dorsal + Ventral Tl10B (7)	0.77381	NaN
3505	M9PB68	Dorsal + Ventral Tl10B (7)	0.669102	NaN
3306	M9NDR2	Dorsal + Ventral Tl10B (7)	0.775865	NaN
3251	M9ND37	Dorsal + Ventral Tl10B (7)	0.777579	NaN
3245	M9ND37	Dorsal + Ventral Tl10B (7)	0.672685	NaN
3231	M9NCX1	Dorsal + Ventral Tl10B (7)	0.765005	NaN
3205	M9NCM6	Dorsal + Ventral Tl10B (7)	0.788709	NaN
2979	M9NDX8	Dorsal + Ventral Tl10B (7)	0.784011	NaN
2971	M9NDX8	Dorsal + Ventral Tl10B (7)	0.699992	NaN
2970	M9NDX8	Dorsal + Ventral Tl10B (7)	0.699992	NaN
2814	Q9VWI1	Dorsal + Ventral Tl10B (7)	0.790406	NaN
2770	E1JJF4	Dorsal + Ventral Tl10B (7)	0.770768	NaN
2433	B7Z0I8	Dorsal + Ventral Tl10B (7)	0.766445	NaN
2387	B7Z0I8	Dorsal + Ventral Tl10B (7)	0.771453	NaN
2371	B7Z0I8	Dorsal + Ventral Tl10B (7)	0.788617	NaN
2293	B7Z002	Dorsal + Ventral Tl10B (7)	0.749142	NaN
2265	B7Z002	Dorsal + Ventral Tl10B (7)	0.784929	NaN
2239	B7Z002	Dorsal + Ventral Tl10B (7)	0.763702	NaN
2186	Q0E8W0	Dorsal + Ventral Tl10B (7)	0.757874	NaN
2162	B5RJS0	Dorsal + Ventral Tl10B (7)	0.733586	NaN
2060	B7Z0G0	Dorsal + Ventral Tl10B (7)	0.633878	NaN
1672	Q8IFW6	Dorsal + Ventral Tl10B (7)	0.787151	NaN
1574	A1Z909	Dorsal + Ventral Tl10B (7)	0.778352	NaN
1294	A0A0B4LH25	Dorsal + Ventral Tl10B (7)	0.761182	NaN
1152	A0A0B4LFJ4	Dorsal + Ventral Tl10B (7)	0.775854	NaN
10082	Q9VYW4	Dorsal + Ventral Tl10B (7)	0.711939	NaN
1102	A0A0B4LFF9	Dorsal + Ventral Tl10B (7)	0.742401	NaN
499	A0A0B4K8A7	Dorsal + Ventral Tl10B (7)	0.764414	NaN
498	A0A0B4K8A7	Dorsal + Ventral Tl10B (7)	0.764414	NaN
328	A0A0B4KHR8	Dorsal + Ventral Tl10B (7)	0.780916	NaN
257	A0A0B4K6I2	Dorsal + Ventral Tl10B (7)	0.665567	NaN
256	A0A0B4K6I2	Dorsal + Ventral Tl10B (7)	0.665567	NaN
215	O46342	Dorsal + Ventral Tl10B (7)	0.700729	NaN
110	A0A0B4JD33	Dorsal + Ventral Tl10B (7)	0.74825	NaN
10202	Q9VZY0	Dorsal + Ventral Tl10B (7)	0.729713	NaN
10345	Q9W1H4	Dorsal + Ventral Tl10B (7)	0.77799	NaN
10725	Q9W425	Dorsal + Ventral Tl10B (7)	0.602968	NaN
12282	Q24154	Dorsal + Ventral Tl10B (7)	0.521758	NaN
12547	Q8INM3	Dorsal + Ventral Tl10B (7)	0.792216	NaN
13186	Q9VUM0	Dorsal + Ventral Tl10B (7)	0.772222	NaN
13215	Q9VW40	Dorsal + Ventral Tl10B (7)	0.76802	NaN
13290	Q9VYV4	Dorsal + Ventral Tl10B (7)	0.770646	NaN
13204	Q9VVG9	Dorsal + Ventral Tl10B (7)	0.765705	NaN
12894	Q9VHJ3	Dorsal + Ventral Tl10B (7)	0.722182	NaN
12462	Q7KU82	Dorsal + Ventral Tl10B (7)	0.731947	NaN
12137	O77430	Dorsal + Ventral Tl10B (7)	0.596823	NaN
10347	Q9W1H4	Dorsal + Ventral Tl10B (7)	0.784244	NaN
10281	Q9W0X8	Dorsal + Ventral Tl10B (7)	0.739715	NaN
1	Q8SYH8	Dorsal + Ventral Tl10B (7)	0.649836	NaN
8427	Q9VKC5	Dorsal + Ventral Tl10B (7)	0.553614	NaN
8738	Q9VN82	Dorsal + Ventral Tl10B (7)	0.586771	NaN
7179	Q9V677	Dorsal + Ventral Tl10B (7)	0.699379	NaN
6260	Q8IPW2	Dorsal + Ventral Tl10B (7)	0.576461	NaN
8739	Q9VN82	Dorsal + Ventral Tl10B (7)	0.594006	NaN
9897	Q9VXG1	Dorsal + Ventral Tl10B (7)	0.593877	NaN
4682	P39205	Dorsal + Ventral Tl10B (7)	0.515666	NaN
1510	A1Z768	Dorsal + Ventral spn27A (8)	NaN	0.598427
12155	X2JEX8	Dorsal + Ventral spn27A (8)	NaN	0.70395
13471	Q9Y095	Dorsal + Ventral spn27A (8)	NaN	0.572912
8734	Q9VN82	Dorsal + Ventral spn27A (8)	NaN	0.551802
3489	M9PB57	Dorsal + Ventral spn27A (8)	NaN	0.736546
6505	Q8ST61	Dorsal + Ventral spn27A (8)	NaN	0.41574
7148	Q9V4F9	Dorsal + Ventral spn27A (8)	NaN	0.666204
7164	Q9V4P1	Dorsal + Ventral spn27A (8)	NaN	0.703267
7217	Q9V9U3	Dorsal + Ventral spn27A (8)	NaN	0.724535
7453	Q9VBX1	Dorsal + Ventral spn27A (8)	NaN	0.63116
8366	Q9VJQ4	Dorsal + Ventral spn27A (8)	NaN	0.587629
8616	X2J9P9	Dorsal + Ventral spn27A (8)	NaN	0.559714
41	A0A0B4JD24	Dorsal + Ventral spn27A (8)	NaN	0.794539
13371	Q9W2U7	Dorsal + Ventral spn27A (8)	NaN	0.703646
13454	Q9W5E4	Dorsal + Ventral spn27A (8)	NaN	0.778577
13393	Q9W3D1	Dorsal + Ventral spn27A (8)	NaN	0.769912
13117	Q9VRN3	Dorsal + Ventral spn27A (8)	NaN	0.753581
42	A0A0B4JD24	Dorsal + Ventral spn27A (8)	NaN	0.799092
381	A1Z8W9	Dorsal + Ventral spn27A (8)	NaN	0.767905
506	A0A0B4KEE7	Dorsal + Ventral spn27A (8)	NaN	0.539454
563	Q95RL2	Dorsal + Ventral spn27A (8)	NaN	0.550509
596	A0A0B4KFA4	Dorsal + Ventral spn27A (8)	NaN	0.776771
623	Q9VNC4	Dorsal + Ventral spn27A (8)	NaN	0.785018
729	A0A126GUN5	Dorsal + Ventral spn27A (8)	NaN	0.790864
755	Q9VEH1	Dorsal + Ventral spn27A (8)	NaN	0.775189
758	Q9VF92	Dorsal + Ventral spn27A (8)	NaN	0.530332
786	A0A0B4KG81	Dorsal + Ventral spn27A (8)	NaN	0.757273
1115	A0A0B4LFF9	Dorsal + Ventral spn27A (8)	NaN	0.795331
1168	A0A0B4LFL3	Dorsal + Ventral spn27A (8)	NaN	0.78553
1189	A0A0B4LFX0	Dorsal + Ventral spn27A (8)	NaN	0.77882
1230	A0A0B4LGF9	Dorsal + Ventral spn27A (8)	NaN	0.750417
1243	A0A0B4LGG4	Dorsal + Ventral spn27A (8)	NaN	0.607892
1271	A0A0B4LGX0	Dorsal + Ventral spn27A (8)	NaN	0.778545
1388	Q960D3	Dorsal + Ventral spn27A (8)	NaN	0.783176
1477	A1Z6I7	Dorsal + Ventral spn27A (8)	NaN	0.765083
1485	A1Z6I7	Dorsal + Ventral spn27A (8)	NaN	0.790954
1651	A1Z9S6	Dorsal + Ventral spn27A (8)	NaN	0.786044
1854	A4V1B2	Dorsal + Ventral spn27A (8)	NaN	0.773593
1895	A4V3G8	Dorsal + Ventral spn27A (8)	NaN	0.769497
1915	B7Z0R6	Dorsal + Ventral spn27A (8)	NaN	0.741003
2012	M9PBL6	Dorsal + Ventral spn27A (8)	NaN	0.646729
2074	M9PGG0	Dorsal + Ventral spn27A (8)	NaN	0.5699
2266	B7Z002	Dorsal + Ventral spn27A (8)	NaN	0.772731
2370	B7Z0I8	Dorsal + Ventral spn27A (8)	NaN	0.784991
2479	Q9VI18	Dorsal + Ventral spn27A (8)	NaN	0.773674
2562	D3PFH9	Dorsal + Ventral spn27A (8)	NaN	0.78894
2585	E1JGX3	Dorsal + Ventral spn27A (8)	NaN	0.738465
2657	M9PE12	Dorsal + Ventral spn27A (8)	NaN	0.773572
2792	Q9VX48	Dorsal + Ventral spn27A (8)	NaN	0.543873
2795	M9PF12	Dorsal + Ventral spn27A (8)	NaN	0.764369
2799	E1JJN9	Dorsal + Ventral spn27A (8)	NaN	0.641393
2935	H0RNK7	Dorsal + Ventral spn27A (8)	NaN	0.612456
2953	H0RNN8	Dorsal + Ventral spn27A (8)	NaN	0.603839
2954	H0RNN8	Dorsal + Ventral spn27A (8)	NaN	0.786775
2961	M9NDX8	Dorsal + Ventral spn27A (8)	NaN	0.789791
2982	M9NDX8	Dorsal + Ventral spn27A (8)	NaN	0.634088
3065	M9MRD9	Dorsal + Ventral spn27A (8)	NaN	0.523807
3077	M9PCJ7	Dorsal + Ventral spn27A (8)	NaN	0.721654
3288	M9NDL7	Dorsal + Ventral spn27A (8)	NaN	0.793788
3430	M9NFQ5	Dorsal + Ventral spn27A (8)	NaN	0.773856
3431	M9NFQ5	Dorsal + Ventral spn27A (8)	NaN	0.776004
3499	M9PB68	Dorsal + Ventral spn27A (8)	NaN	0.634922
3605	M9PC73	Dorsal + Ventral spn27A (8)	NaN	0.782982
3842	M9PFY1	Dorsal + Ventral spn27A (8)	NaN	0.79448
3889	Q7KTV5	Dorsal + Ventral spn27A (8)	NaN	0.737496
4006	Q9VYK0	Dorsal + Ventral spn27A (8)	NaN	0.615325
4068	M9PHL0	Dorsal + Ventral spn27A (8)	NaN	0.783385
4138	M9PJN9	Dorsal + Ventral spn27A (8)	NaN	0.640841
4206	O17468	Dorsal + Ventral spn27A (8)	NaN	0.641089
4207	O17468	Dorsal + Ventral spn27A (8)	NaN	0.645328
4253	Q7KW02	Dorsal + Ventral spn27A (8)	NaN	0.776471
4277	O61604	Dorsal + Ventral spn27A (8)	NaN	0.79218
4318	O96838	Dorsal + Ventral spn27A (8)	NaN	0.432468
4326	O97132	Dorsal + Ventral spn27A (8)	NaN	0.614699
4374	X2JB25	Dorsal + Ventral spn27A (8)	NaN	0.32929
4450	P09208	Dorsal + Ventral spn27A (8)	NaN	0.648667
4451	P09208	Dorsal + Ventral spn27A (8)	NaN	0.648667
4471	P13496	Dorsal + Ventral spn27A (8)	NaN	0.693469
4472	P13496	Dorsal + Ventral spn27A (8)	NaN	0.701847
4523	P20240	Dorsal + Ventral spn27A (8)	NaN	0.793096
4884	Q05913	Dorsal + Ventral spn27A (8)	NaN	0.789451
4909	Q0E8J0	Dorsal + Ventral spn27A (8)	NaN	0.785028
4988	Q24113	Dorsal + Ventral spn27A (8)	NaN	0.61687
5151	Q29QE1	Dorsal + Ventral spn27A (8)	NaN	0.779916
5167	Q2PE14	Dorsal + Ventral spn27A (8)	NaN	0.772348
5227	Q59DT1	Dorsal + Ventral spn27A (8)	NaN	0.735865
5271	Q5U0V7	Dorsal + Ventral spn27A (8)	NaN	0.785266
5412	Q7JZ25	Dorsal + Ventral spn27A (8)	NaN	0.778547
5427	Q7K0D3	Dorsal + Ventral spn27A (8)	NaN	0.778695
5477	Q7K180	Dorsal + Ventral spn27A (8)	NaN	0.7592
5496	Q7K264	Dorsal + Ventral spn27A (8)	NaN	0.738728
5497	Q7K264	Dorsal + Ventral spn27A (8)	NaN	0.74635
5557	Q7K3Z3	Dorsal + Ventral spn27A (8)	NaN	0.741307
5627	Q7KLE5	Dorsal + Ventral spn27A (8)	NaN	0.789672
5632	Q7KM15	Dorsal + Ventral spn27A (8)	NaN	0.778606
5633	Q7KM15	Dorsal + Ventral spn27A (8)	NaN	0.611387
5796	Q9VM57	Dorsal + Ventral spn27A (8)	NaN	0.761091
5940	Q7YZ95	Dorsal + Ventral spn27A (8)	NaN	0.788685
6027	Q9VLL3	Dorsal + Ventral spn27A (8)	NaN	0.747508
6037	Q86BP6	Dorsal + Ventral spn27A (8)	NaN	0.510216
6045	Q86BS3	Dorsal + Ventral spn27A (8)	NaN	0.789756
6056	Q86BS3	Dorsal + Ventral spn27A (8)	NaN	0.792584
6145	Q8INM3	Dorsal + Ventral spn27A (8)	NaN	0.760353
6172	Q8INM3	Dorsal + Ventral spn27A (8)	NaN	0.768243
6184	Q8INM3	Dorsal + Ventral spn27A (8)	NaN	0.788086
6214	Q8INM3	Dorsal + Ventral spn27A (8)	NaN	0.773502
6224	Q8INM3	Dorsal + Ventral spn27A (8)	NaN	0.760397
6234	Q8INX3	Dorsal + Ventral spn27A (8)	NaN	0.750077
6237	Q8IP71	Dorsal + Ventral spn27A (8)	NaN	0.77087
6254	Q9VMX2	Dorsal + Ventral spn27A (8)	NaN	0.724509
6255	Q9I7P8	Dorsal + Ventral spn27A (8)	NaN	0.564958
6321	Q8IR15	Dorsal + Ventral spn27A (8)	NaN	0.535355
6348	Q8IRB5	Dorsal + Ventral spn27A (8)	NaN	0.638816
6354	Q8IRB5	Dorsal + Ventral spn27A (8)	NaN	0.800061
6536	Q8SX89	Dorsal + Ventral spn27A (8)	NaN	0.792293
6590	Q8T051	Dorsal + Ventral spn27A (8)	NaN	0.768938
6742	Q95RR6	Dorsal + Ventral spn27A (8)	NaN	0.782806
6779	Q960D3	Dorsal + Ventral spn27A (8)	NaN	0.547703
6806	Q9I7J4	Dorsal + Ventral spn27A (8)	NaN	0.782939
6873	Q9I7T7	Dorsal + Ventral spn27A (8)	NaN	0.749936
6945	Q9V3E9	Dorsal + Ventral spn27A (8)	NaN	0.618507
6951	Q9V3E9	Dorsal + Ventral spn27A (8)	NaN	0.53259
6993	X2JF59	Dorsal + Ventral spn27A (8)	NaN	0.62455
7049	Q9V3Y4	Dorsal + Ventral spn27A (8)	NaN	0.555819
7065	Q9V406	Dorsal + Ventral spn27A (8)	NaN	0.754208
7195	Q9V7P1	Dorsal + Ventral spn27A (8)	NaN	0.767555
7261	Q9VAH7	Dorsal + Ventral spn27A (8)	NaN	0.76219
7295	Q9VAN6	Dorsal + Ventral spn27A (8)	NaN	0.778771
7297	Q9VAN7	Dorsal + Ventral spn27A (8)	NaN	0.779348
7460	Q9VBY6	Dorsal + Ventral spn27A (8)	NaN	0.768238
7479	Q9VC10	Dorsal + Ventral spn27A (8)	NaN	0.771792
7539	Q9VC60	Dorsal + Ventral spn27A (8)	NaN	0.754903
7656	Q9VCI7	Dorsal + Ventral spn27A (8)	NaN	0.705036
7708	Q9VCX1	Dorsal + Ventral spn27A (8)	NaN	0.772687
7734	Q9VDD2	Dorsal + Ventral spn27A (8)	NaN	0.755665
7767	Q9VDK7	Dorsal + Ventral spn27A (8)	NaN	0.768233
7850	Q9VEL2	Dorsal + Ventral spn27A (8)	NaN	0.763041
7893	Q9VF03	Dorsal + Ventral spn27A (8)	NaN	0.621787
7936	Q9VG01	Dorsal + Ventral spn27A (8)	NaN	0.729613
8114	Q9VHK1	Dorsal + Ventral spn27A (8)	NaN	0.794611
8255	Q9VIP9	Dorsal + Ventral spn27A (8)	NaN	0.801521
8477	Q9VKQ9	Dorsal + Ventral spn27A (8)	NaN	0.73203
8498	Q9VKW2	Dorsal + Ventral spn27A (8)	NaN	0.733525
8677	Q9VMI9	Dorsal + Ventral spn27A (8)	NaN	0.671069
8700	Q9VN21	Dorsal + Ventral spn27A (8)	NaN	0.775887
8795	Q9VNE0	Dorsal + Ventral spn27A (8)	NaN	0.782909
8796	Q9VNE0	Dorsal + Ventral spn27A (8)	NaN	0.782909
8827	Q9VNI3	Dorsal + Ventral spn27A (8)	NaN	0.773609
8840	Q9VNP5	Dorsal + Ventral spn27A (8)	NaN	0.785637
8853	Q9VP05	Dorsal + Ventral spn27A (8)	NaN	0.778586
8882	Q9VP57	Dorsal + Ventral spn27A (8)	NaN	0.62578
8897	Q9VPC0	Dorsal + Ventral spn27A (8)	NaN	0.640979
9092	Q9VR38	Dorsal + Ventral spn27A (8)	NaN	0.731424
9110	Q9VRH6	Dorsal + Ventral spn27A (8)	NaN	0.772722
9241	Q9VT00	Dorsal + Ventral spn27A (8)	NaN	0.756565
9254	Q9VT61	Dorsal + Ventral spn27A (8)	NaN	0.787336
9348	Q9VTU0	Dorsal + Ventral spn27A (8)	NaN	0.769347
9446	Q9VU89	Dorsal + Ventral spn27A (8)	NaN	0.634034
9455	Q9VUB5	Dorsal + Ventral spn27A (8)	NaN	0.627259
9476	Q9VUE5	Dorsal + Ventral spn27A (8)	NaN	0.751244
9614	Q9VVD9	Dorsal + Ventral spn27A (8)	NaN	0.627837
9712	Q9VWE0	Dorsal + Ventral spn27A (8)	NaN	0.752692
9754	Q9VWK5	Dorsal + Ventral spn27A (8)	NaN	0.681066
9836	Q9VX24	Dorsal + Ventral spn27A (8)	NaN	0.77426
9844	X2JFW6	Dorsal + Ventral spn27A (8)	NaN	0.615615
9951	Q9VXW2	Dorsal + Ventral spn27A (8)	NaN	0.785728
10089	Q9VYX4	Dorsal + Ventral spn27A (8)	NaN	0.780385
10119	X2JEU3	Dorsal + Ventral spn27A (8)	NaN	0.786444
10122	X2JEU3	Dorsal + Ventral spn27A (8)	NaN	0.781411
10148	Q9VZ60	Dorsal + Ventral spn27A (8)	NaN	0.780953
10152	Q9VZ60	Dorsal + Ventral spn27A (8)	NaN	0.777722
10160	Q9VZ60	Dorsal + Ventral spn27A (8)	NaN	0.777649
10167	Q9VZD8	Dorsal + Ventral spn27A (8)	NaN	0.774266
10326	Q9W1A9	Dorsal + Ventral spn27A (8)	NaN	0.737818
10342	Q9W1H3	Dorsal + Ventral spn27A (8)	NaN	0.781989
10381	Q9W1N8	Dorsal + Ventral spn27A (8)	NaN	0.765757
10487	Q9W2U7	Dorsal + Ventral spn27A (8)	NaN	0.75004
10489	Q9W2U7	Dorsal + Ventral spn27A (8)	NaN	0.757378
10589	Q9W3D1	Dorsal + Ventral spn27A (8)	NaN	0.771813
10590	Q9W3D1	Dorsal + Ventral spn27A (8)	NaN	0.769891
10647	X2JE07	Dorsal + Ventral spn27A (8)	NaN	0.749725
10665	X2JE07	Dorsal + Ventral spn27A (8)	NaN	0.763954
10989	Q9XZ21	Dorsal + Ventral spn27A (8)	NaN	0.538036
11252	X2JC00	Dorsal + Ventral spn27A (8)	NaN	0.772661
11253	X2JC00	Dorsal + Ventral spn27A (8)	NaN	0.772661
11324	A0A0B4K6D6	Dorsal + Ventral spn27A (8)	NaN	0.499425
11564	A0A0S0X2W5	Dorsal + Ventral spn27A (8)	NaN	0.622517
11590	A1Z898	Dorsal + Ventral spn27A (8)	NaN	0.774889
11593	A1Z898	Dorsal + Ventral spn27A (8)	NaN	0.774704
11775	Q9VI18	Dorsal + Ventral spn27A (8)	NaN	0.755815
11809	E1JHE1	Dorsal + Ventral spn27A (8)	NaN	0.787048
11813	Q9VMV9	Dorsal + Ventral spn27A (8)	NaN	0.757206
11817	M9PE12	Dorsal + Ventral spn27A (8)	NaN	0.788304
11894	M9MS86	Dorsal + Ventral spn27A (8)	NaN	0.759464
11960	M9NG39	Dorsal + Ventral spn27A (8)	NaN	0.629843
11961	M9NG39	Dorsal + Ventral spn27A (8)	NaN	0.482575
11986	Q9VIV0	Dorsal + Ventral spn27A (8)	NaN	0.755762
12046	Q7KTV5	Dorsal + Ventral spn27A (8)	NaN	0.623942
13088	Q9VQF7	Dorsal + Ventral spn27A (8)	NaN	0.752944
12165	P15348	Dorsal + Ventral spn27A (8)	NaN	0.737406
12219	P46863	Dorsal + Ventral spn27A (8)	NaN	0.778835
12250	Q05913	Dorsal + Ventral spn27A (8)	NaN	0.77605
12262	Q0E8J0	Dorsal + Ventral spn27A (8)	NaN	0.784343
12390	Q7K0X3	Dorsal + Ventral spn27A (8)	NaN	0.611778
12426	Q7KMH9	Dorsal + Ventral spn27A (8)	NaN	0.777618
12453	Q7KTG2	Dorsal + Ventral spn27A (8)	NaN	0.734295
12459	Q7KU82	Dorsal + Ventral spn27A (8)	NaN	0.505667
12499	Q86BP6	Dorsal + Ventral spn27A (8)	NaN	0.510216
12682	Q9V3H2	Dorsal + Ventral spn27A (8)	NaN	0.529347
12709	Q9V4D4	Dorsal + Ventral spn27A (8)	NaN	0.793051
12802	Q9VCH5	Dorsal + Ventral spn27A (8)	NaN	0.7714
13057	Q9VNW2	Dorsal + Ventral spn27A (8)	NaN	0.788294
12843	Q9VEF5	Dorsal + Ventral spn27A (8)	NaN	0.768814
[truncated: 924 more rows]
