# Supplementary material for: Differential regulation of the proteome and phosphoproteome along the dorso-ventral axis of the early Drosophila embryo
Source: eLife. 2024 Sep 2;13:e99263. doi: 10.7554/eLife.99263 (PMC11466282; doi:10.7554/eLife.99263)
Supplement: Supplementary file 12. [file elife-99263-supp12.xlsx]

## Sheet: CC_Network_LFQ_TargetGroups
GO term	cluster	is Dev Tl10B	is Dev Spn	is ED Tl10B	is ED Spn	uniprot	gene	pvalue
cell cortex	Dorsal (1)	None	None	ED Tl10B	ED Spn	O97111	par-6	2.09191e-10
cell cortex	Dorsal (1)	None	None	ED Tl10B	ED Spn	Q9VXE3	Rok	2.09191e-10
cell cortex	Dorsal (1)	None	None	ED Tl10B	ED Spn	P48608	dia	2.09191e-10
cell cortex	Dorsal (1)	None	None	ED Tl10B	ED Spn	Q24120	capu	2.09191e-10
cell cortex	Dorsal (1)	None	None	ED Tl10B	ED Spn	P48148	Rho1	2.09191e-10
cell cortex	Dorsal (1)	None	None	ED Tl10B	ED Spn	Q7KNQ9	cnk	2.09191e-10
cell cortex	Dorsal (1)	None	None	ED Tl10B	ED Spn	Q9U1K1	spir	2.09191e-10
cell cortex	Dorsal (1)	None	None	ED Tl10B	ED Spn	P40792	Rac1	2.09191e-10
cell cortex	Dorsal (1)	None	None	ED Tl10B	ED Spn	Q9W3R6	Dok	2.09191e-10
cell cortex	Dorsal (1)	None	None	ED Tl10B	ED Spn	Q8T9L5	Lkb1	2.09191e-10
cell cortex	Dorsal (1)	None	None	ED Tl10B	ED Spn	P25843	chic	2.09191e-10
cell cortex	Dorsal (1)	None	None	ED Tl10B	ED Spn	O97111	par-6	2.09191e-10
cell cortex	Dorsal (1)	None	None	ED Tl10B	ED Spn	Q9U1K1	spir	2.09191e-10
cell cortex	Dorsal (1)	None	None	ED Tl10B	ED Spn	Q8T9L5	Lkb1	2.09191e-10
cell cortex	Dorsal (1)	None	None	ED Tl10B	ED Spn	Q7KNQ9	cnk	2.09191e-10
cell cortex	Dorsal (1)	None	None	ED Tl10B	ED Spn	P48148	Rho1	2.09191e-10
cell cortex	Dorsal (1)	None	None	ED Tl10B	ED Spn	Q9VXE3	Rok	2.09191e-10
cell cortex	Dorsal (1)	None	None	ED Tl10B	ED Spn	Q9W3R6	Dok	2.09191e-10
cell cortex	Dorsal (1)	None	None	ED Tl10B	ED Spn	P40792	Rac1	2.09191e-10
cell cortex	Dorsal (1)	None	None	ED Tl10B	ED Spn	Q24120	capu	2.09191e-10
cell cortex	Dorsal (1)	None	None	ED Tl10B	ED Spn	P48608	dia	2.09191e-10
cell cortex	Dorsal (1)	None	None	ED Tl10B	ED Spn	P25843	chic	2.09191e-10
cell cortex	Dorsal+Ventral (9)	None	None	ED Tl10B	ED Spn	Q960X8	Hrs	2.49221e-10
cell cortex	Dorsal+Ventral (9)	None	None	ED Tl10B	ED Spn	Q9VX75	baz	2.49221e-10
cell cortex	Dorsal+Ventral (9)	None	None	ED Tl10B	ED Spn	P18431	sgg	2.49221e-10
cell cortex	Dorsal+Ventral (9)	None	None	ED Tl10B	ED Spn	O97111	par-6	2.49221e-10
cell cortex	Dorsal+Ventral (9)	None	None	ED Tl10B	ED Spn	Q9W3R6	Dok	2.49221e-10
cell cortex	Dorsal+Ventral (9)	None	None	ED Tl10B	ED Spn	A1Z9X0	aPKC	2.49221e-10
cell cortex	Dorsal+Ventral (9)	None	None	ED Tl10B	ED Spn	P40793	Cdc42	2.49221e-10
cell cortex	Dorsal+Ventral (9)	None	None	ED Tl10B	ED Spn	Q24298	shg	2.49221e-10
cell cortex	Dorsal+Ventral (9)	None	None	ED Tl10B	ED Spn	Q9XTN2	chico	2.49221e-10
cell cortex	Dorsal+Ventral (9)	None	None	ED Tl10B	ED Spn	P08111	l(2)gl	2.49221e-10
cell cortex	Dorsal+Ventral (9)	None	None	ED Tl10B	ED Spn	P40792	Rac1	2.49221e-10
cell cortex	Dorsal+Ventral (9)	None	None	ED Tl10B	ED Spn	Q24298	shg	2.49221e-10
cell cortex	Dorsal+Ventral (9)	None	None	ED Tl10B	ED Spn	Q9VX75	baz	2.49221e-10
cell cortex	Dorsal+Ventral (9)	None	None	ED Tl10B	ED Spn	Q9XTN2	chico	2.49221e-10
cell cortex	Dorsal+Ventral (9)	None	None	ED Tl10B	ED Spn	P08111	l(2)gl	2.49221e-10
cell cortex	Dorsal+Ventral (9)	None	None	ED Tl10B	ED Spn	A1Z9X0	aPKC	2.49221e-10
cell cortex	Dorsal+Ventral (9)	None	None	ED Tl10B	ED Spn	P40792	Rac1	2.49221e-10
cell cortex	Dorsal+Ventral (9)	None	None	ED Tl10B	ED Spn	O97111	par-6	2.49221e-10
cell cortex	Dorsal+Ventral (9)	None	None	ED Tl10B	ED Spn	Q9W3R6	Dok	2.49221e-10
cell cortex	Dorsal+Ventral (9)	None	None	ED Tl10B	ED Spn	P18431	sgg	2.49221e-10
cell cortex	Dorsal+Ventral (9)	None	None	ED Tl10B	ED Spn	Q960X8	Hrs	2.49221e-10
cell cortex	Dorsal+Ventral (9)	None	None	ED Tl10B	ED Spn	P40793	Cdc42	2.49221e-10
cell cortex	Lateral+Ventral (9)	Dev Tl10B	Dev Spn	ED Tl10B	ED Spn	Q24564	Mer	0.000428037
cell cortex	Lateral+Ventral (9)	Dev Tl10B	Dev Spn	ED Tl10B	ED Spn	Q95UN8	slpr	0.000428037
cell cortex	Lateral+Ventral (9)	Dev Tl10B	Dev Spn	ED Tl10B	ED Spn	P40792	Rac1	0.000428037
cell cortex	Lateral+Ventral (9)	Dev Tl10B	Dev Spn	ED Tl10B	ED Spn	A1ZBL7	par-1	0.000428037
cell cortex	Lateral+Ventral (9)	Dev Tl10B	Dev Spn	ED Tl10B	ED Spn	P40792	Rac1	0.000428037
cell cortex	Lateral+Ventral (9)	Dev Tl10B	Dev Spn	ED Tl10B	ED Spn	Q24564	Mer	0.000428037
cell cortex	Lateral+Ventral (9)	Dev Tl10B	Dev Spn	ED Tl10B	ED Spn	P29617	pros	0.000117892
cell cortex	Lateral+Ventral (9)	Dev Tl10B	Dev Spn	ED Tl10B	ED Spn	P08111	l(2)gl	0.000117892
cell cortex	Lateral+Ventral (9)	Dev Tl10B	Dev Spn	ED Tl10B	ED Spn	Q8MQJ9	brat	0.000117892
cell cortex	Lateral+Ventral (9)	Dev Tl10B	Dev Spn	ED Tl10B	ED Spn	P40792	Rac1	0.000117892
cell cortex	Lateral+Ventral (9)	Dev Tl10B	Dev Spn	ED Tl10B	ED Spn	P29617	pros	9.73552e-05
cell cortex	Lateral+Ventral (9)	Dev Tl10B	Dev Spn	ED Tl10B	ED Spn	Q8MQJ9	brat	9.73552e-05
cell cortex	Lateral+Ventral (9)	Dev Tl10B	Dev Spn	ED Tl10B	ED Spn	P08111	l(2)gl	9.73552e-05
cell cortex	Lateral+Ventral (9)	Dev Tl10B	Dev Spn	ED Tl10B	ED Spn	P40792	Rac1	9.73552e-05
apical cortex	Dorsal+Lateral (6)	Dev Tl10B	Dev Spn	ED Tl10B	ED Spn	Q8T0S6	hpo	3.4047e-05
apical cortex	Dorsal+Lateral (6)	Dev Tl10B	Dev Spn	ED Tl10B	ED Spn	M9NFI9	Spn	3.4047e-05
apical cortex	Dorsal+Lateral (6)	Dev Tl10B	Dev Spn	ED Tl10B	ED Spn	Q9VA38	wts	3.4047e-05
apical cortex	Dorsal+Lateral (6)	Dev Tl10B	Dev Spn	ED Tl10B	ED Spn	M9NFI9	Spn	6.87692e-06
apical cortex	Dorsal+Lateral (6)	Dev Tl10B	Dev Spn	ED Tl10B	ED Spn	Q9VA38	wts	6.87692e-06
apical cortex	Dorsal+Lateral (6)	Dev Tl10B	Dev Spn	ED Tl10B	ED Spn	Q9W3H6	sdt	6.87692e-06
apical cortex	Dorsal+Lateral (6)	Dev Tl10B	Dev Spn	ED Tl10B	ED Spn	Q8T0S6	hpo	6.87692e-06
apical cortex	Dorsal+Lateral (6)	Dev Tl10B	Dev Spn	ED Tl10B	ED Spn	Q9VA38	wts	0.000606409
apical cortex	Dorsal+Lateral (6)	Dev Tl10B	Dev Spn	ED Tl10B	ED Spn	Q9W3H6	sdt	0.000606409
apical cortex	Dorsal+Lateral (6)	Dev Tl10B	Dev Spn	ED Tl10B	ED Spn	Q8T0S6	hpo	0.000606409
apical cortex	Dorsal+Lateral (6)	Dev Tl10B	Dev Spn	ED Tl10B	ED Spn	M9NFI9	Spn	2.55809e-05
apical cortex	Dorsal+Lateral (6)	Dev Tl10B	Dev Spn	ED Tl10B	ED Spn	Q8T0S6	hpo	2.55809e-05
apical cortex	Dorsal+Lateral (6)	Dev Tl10B	Dev Spn	ED Tl10B	ED Spn	Q9W3H6	sdt	2.55809e-05
apical cortex	Dorsal+Lateral (6)	Dev Tl10B	Dev Spn	ED Tl10B	ED Spn	Q9VA38	wts	2.55809e-05
basal cortex	Lateral+Ventral (9)	None	None	ED Tl10B	ED Spn	P29617	pros	0.000265029
basal cortex	Lateral+Ventral (9)	None	None	ED Tl10B	ED Spn	Q8MQJ9	brat	0.000265029
basal cortex	Lateral+Ventral (9)	None	None	ED Tl10B	ED Spn	P29617	pros	0.000241095
basal cortex	Lateral+Ventral (9)	None	None	ED Tl10B	ED Spn	Q8MQJ9	brat	0.000241095
basement membrane	Ventral (5)	None	None	ED Tl10B	ED Spn	P15215	LanB2	0.000348576
basement membrane	Ventral (5)	None	None	ED Tl10B	ED Spn	P11046	LanB1	0.000348576
basement membrane	Ventral (5)	None	None	ED Tl10B	ED Spn	P15215	LanB2	0.000417609
basement membrane	Ventral (5)	None	None	ED Tl10B	ED Spn	P11046	LanB1	0.000417609
cell-cell adherens junction	Dorsal+Ventral (9)	None	None	ED Tl10B	ED Spn	Q24298	shg	6.38047e-05
cell-cell adherens junction	Dorsal+Ventral (9)	None	None	ED Tl10B	ED Spn	Q9VX75	baz	6.38047e-05
cell-cell adherens junction	Dorsal+Ventral (9)	None	None	ED Tl10B	ED Spn	P18824	arm	6.38047e-05
cell-cell adherens junction	Dorsal+Ventral (9)	None	None	ED Tl10B	ED Spn	Q9VJB6	CadN2	6.38047e-05
cell-cell adherens junction	Dorsal+Ventral (9)	None	None	ED Tl10B	ED Spn	Q24298	shg	6.38047e-05
cell-cell adherens junction	Dorsal+Ventral (9)	None	None	ED Tl10B	ED Spn	Q9VJB6	CadN2	6.38047e-05
cell-cell adherens junction	Dorsal+Ventral (9)	None	None	ED Tl10B	ED Spn	Q9VX75	baz	6.38047e-05
cell-cell adherens junction	Dorsal+Ventral (9)	None	None	ED Tl10B	ED Spn	P18824	arm	6.38047e-05
cell-cell contact zone	Dorsal (1)	None	None	ED Tl10B	ED Spn	Q9VXE3	Rok	0.000203619
cell-cell contact zone	Dorsal (1)	None	None	ED Tl10B	ED Spn	P48148	Rho1	0.000203619
cell-cell contact zone	Dorsal (1)	None	None	ED Tl10B	ED Spn	P48148	Rho1	0.000203619
cell-cell contact zone	Dorsal (1)	None	None	ED Tl10B	ED Spn	Q9VXE3	Rok	0.000203619
cell-cell junction	Dorsal+Lateral (6)	Dev Tl10B	Dev Spn	ED Tl10B	None	Q8T0S6	hpo	0.000123173
cell-cell junction	Dorsal+Lateral (6)	Dev Tl10B	Dev Spn	ED Tl10B	None	Q9VA38	wts	0.000123173
cell-cell junction	Dorsal+Lateral (6)	Dev Tl10B	Dev Spn	ED Tl10B	None	Q8T0S6	hpo	0.000463661
cell-cell junction	Dorsal+Lateral (6)	Dev Tl10B	Dev Spn	ED Tl10B	None	Q9VA38	wts	0.000463661
cell-cell junction	Dorsal+Lateral (6)	Dev Tl10B	Dev Spn	ED Tl10B	None	Q9VA38	wts	0.00080834
cell-cell junction	Dorsal+Lateral (6)	Dev Tl10B	Dev Spn	ED Tl10B	None	Q8T0S6	hpo	0.00080834
zonula adherens	Dorsal+Ventral (9)	None	None	ED Tl10B	ED Spn	Q9VX75	baz	0.000159029
zonula adherens	Dorsal+Ventral (9)	None	None	ED Tl10B	ED Spn	P18824	arm	0.000159029
zonula adherens	Dorsal+Ventral (9)	None	None	ED Tl10B	ED Spn	Q24298	shg	0.000159029
zonula adherens	Dorsal+Ventral (9)	None	None	ED Tl10B	ED Spn	Q24298	shg	0.000159029
zonula adherens	Dorsal+Ventral (9)	None	None	ED Tl10B	ED Spn	Q9VX75	baz	0.000159029
zonula adherens	Dorsal+Ventral (9)	None	None	ED Tl10B	ED Spn	P18824	arm	0.000159029
cytoskeleton	Dorsal (1)	None	None	ED Tl10B	ED Spn	A1Z9J3	shot	3.18756e-08
cytoskeleton	Dorsal (1)	None	None	ED Tl10B	ED Spn	P08879	awd	3.18756e-08
cytoskeleton	Dorsal (1)	None	None	ED Tl10B	ED Spn	Q9VXE3	Rok	3.18756e-08
cytoskeleton	Dorsal (1)	None	None	ED Tl10B	ED Spn	P48608	dia	3.18756e-08
cytoskeleton	Dorsal (1)	None	None	ED Tl10B	ED Spn	Q24120	capu	3.18756e-08
cytoskeleton	Dorsal (1)	None	None	ED Tl10B	ED Spn	P48148	Rho1	3.18756e-08
cytoskeleton	Dorsal (1)	None	None	ED Tl10B	ED Spn	Q9U1K1	spir	3.18756e-08
cytoskeleton	Dorsal (1)	None	None	ED Tl10B	ED Spn	P25843	chic	3.18756e-08
cytoskeleton	Dorsal (1)	None	None	ED Tl10B	ED Spn	P83967	Act88F	3.18756e-08
cytoskeleton	Dorsal (1)	None	None	ED Tl10B	ED Spn	P46863	Klp61F	3.18756e-08
cytoskeleton	Dorsal (1)	None	None	ED Tl10B	ED Spn	Q24592	hop	3.18756e-08
cytoskeleton	Dorsal (1)	None	None	ED Tl10B	ED Spn	P83967	Act88F	3.18756e-08
cytoskeleton	Dorsal (1)	None	None	ED Tl10B	ED Spn	Q9U1K1	spir	3.18756e-08
cytoskeleton	Dorsal (1)	None	None	ED Tl10B	ED Spn	P48148	Rho1	3.18756e-08
cytoskeleton	Dorsal (1)	None	None	ED Tl10B	ED Spn	P46863	Klp61F	3.18756e-08
cytoskeleton	Dorsal (1)	None	None	ED Tl10B	ED Spn	Q9VXE3	Rok	3.18756e-08
cytoskeleton	Dorsal (1)	None	None	ED Tl10B	ED Spn	Q24592	hop	3.18756e-08
cytoskeleton	Dorsal (1)	None	None	ED Tl10B	ED Spn	P08879	awd	3.18756e-08
cytoskeleton	Dorsal (1)	None	None	ED Tl10B	ED Spn	Q24120	capu	3.18756e-08
cytoskeleton	Dorsal (1)	None	None	ED Tl10B	ED Spn	A1Z9J3	shot	3.18756e-08
cytoskeleton	Dorsal (1)	None	None	ED Tl10B	ED Spn	P48608	dia	3.18756e-08
cytoskeleton	Dorsal (1)	None	None	ED Tl10B	ED Spn	P25843	chic	3.18756e-08
cytoskeleton	Dorsal+Lateral (6)	None	None	ED Tl10B	ED Spn	P45594	tsr	9.62065e-05
cytoskeleton	Dorsal+Lateral (6)	None	None	ED Tl10B	ED Spn	Q9VA38	wts	9.62065e-05
cytoskeleton	Dorsal+Lateral (6)	None	None	ED Tl10B	ED Spn	Q95RA8	mats	9.62065e-05
cytoskeleton	Dorsal+Lateral (6)	None	None	ED Tl10B	ED Spn	Q9W0G6	msd5	9.62065e-05
cytoskeleton	Dorsal+Lateral (6)	None	None	ED Tl10B	ED Spn	Q9VKD6	dgt2	9.62065e-05
cytoskeleton	Dorsal+Lateral (6)	None	None	ED Tl10B	ED Spn	Q95RA8	mats	0.000117259
cytoskeleton	Dorsal+Lateral (6)	None	None	ED Tl10B	ED Spn	Q9VA38	wts	0.000117259
cytoskeleton	Dorsal+Lateral (6)	None	None	ED Tl10B	ED Spn	Q9W0G6	msd5	0.000117259
cytoskeleton	Dorsal+Lateral (6)	None	None	ED Tl10B	ED Spn	P45594	tsr	0.000117259
cytoskeleton	Dorsal+Lateral (6)	None	None	ED Tl10B	ED Spn	Q9VKD6	dgt2	0.000117259
myosin V complex	Dorsal (1)	Dev Tl10B	Dev Spn	ED Tl10B	ED Spn	P54357	Mlc-c	5.27952e-05
myosin V complex	Dorsal (1)	Dev Tl10B	Dev Spn	ED Tl10B	ED Spn	A1Z6Z9	didum	5.27952e-05
myosin V complex	Dorsal (1)	Dev Tl10B	Dev Spn	ED Tl10B	ED Spn	P54357	Mlc-c	5.27952e-05
myosin V complex	Dorsal (1)	Dev Tl10B	Dev Spn	ED Tl10B	ED Spn	A1Z6Z9	didum	5.27952e-05
myosin V complex	Dorsal (1)	Dev Tl10B	Dev Spn	ED Tl10B	ED Spn	A1Z6Z9	didum	4.9286e-07
myosin V complex	Dorsal (1)	Dev Tl10B	Dev Spn	ED Tl10B	ED Spn	A1Z700	didum	4.9286e-07
myosin V complex	Dorsal (1)	Dev Tl10B	Dev Spn	ED Tl10B	ED Spn	A1Z6Z8	didum	4.9286e-07
myosin V complex	Dorsal (1)	Dev Tl10B	Dev Spn	ED Tl10B	ED Spn	A1Z700	didum	4.9286e-07
myosin V complex	Dorsal (1)	Dev Tl10B	Dev Spn	ED Tl10B	ED Spn	A1Z6Z9	didum	4.9286e-07
myosin V complex	Dorsal (1)	Dev Tl10B	Dev Spn	ED Tl10B	ED Spn	A1Z6Z8	didum	4.9286e-07
myosin VI complex	Dorsal (1)	Dev Tl10B	Dev Spn	None	None	P54357	Mlc-c	3.1724e-05
myosin VI complex	Dorsal (1)	Dev Tl10B	Dev Spn	None	None	P49258	Acam	3.1724e-05
myosin VI complex	Dorsal (1)	Dev Tl10B	Dev Spn	None	None	P54357	Mlc-c	3.1724e-05
myosin VI complex	Dorsal (1)	Dev Tl10B	Dev Spn	None	None	P49258	Acam	3.1724e-05
centriole	Dorsal+Lateral (6)	None	None	ED Tl10B	ED Spn	Q9VC64	ana1	0.000107469
centriole	Dorsal+Lateral (6)	None	None	ED Tl10B	ED Spn	Q960T6	Cep135	0.000107469
centriole	Dorsal+Lateral (6)	None	None	ED Tl10B	ED Spn	Q9VNE4	asl	0.000107469
centriole	Dorsal+Lateral (6)	None	None	ED Tl10B	ED Spn	Q9VC64	ana1	0.000121164
centriole	Dorsal+Lateral (6)	None	None	ED Tl10B	ED Spn	Q960T6	Cep135	0.000121164
centriole	Dorsal+Lateral (6)	None	None	ED Tl10B	ED Spn	Q9VNE4	asl	0.000121164

## Sheet: CC_Network_Phospho_TargetGroups
GO term	cluster	is Dev Tl10B	is Dev Spn	is ED Tl10B	is ED Spn	uniprot	gene	pvalue
adherens junction	Dorsal (1)	Dev Tl10B	Dev Spn	ED Tl10B	ED Spn	P18824	arm	1.59604e-14
adherens junction	Dorsal (1)	Dev Tl10B	Dev Spn	ED Tl10B	ED Spn	A1Z9J1	shot	1.59604e-14
adherens junction	Dorsal (1)	Dev Tl10B	Dev Spn	ED Tl10B	ED Spn	Q24298	shg	1.59604e-14
adherens junction	Dorsal (1)	Dev Tl10B	Dev Spn	ED Tl10B	ED Spn	P07207	N	1.59604e-14
adherens junction	Dorsal (1)	Dev Tl10B	Dev Spn	ED Tl10B	ED Spn	A1Z9I9	shot	1.59604e-14
adherens junction	Dorsal (1)	Dev Tl10B	Dev Spn	ED Tl10B	ED Spn	P00522	Abl	1.59604e-14
adherens junction	Dorsal (1)	Dev Tl10B	Dev Spn	ED Tl10B	ED Spn	Q9VN82	cno	1.59604e-14
adherens junction	Dorsal (1)	Dev Tl10B	Dev Spn	ED Tl10B	ED Spn	Q9W3H8	sdt	1.59604e-14
adherens junction	Dorsal (1)	Dev Tl10B	Dev Spn	ED Tl10B	ED Spn	Q9VQ78	TBCD	1.59604e-14
adherens junction	Dorsal (1)	Dev Tl10B	Dev Spn	ED Tl10B	ED Spn	Q9VHK3	pyd	1.59604e-14
adherens junction	Dorsal (1)	Dev Tl10B	Dev Spn	ED Tl10B	ED Spn	P00522	Abl	1.00562e-08
adherens junction	Dorsal (1)	Dev Tl10B	Dev Spn	ED Tl10B	ED Spn	Q9VN82	cno	1.00562e-08
adherens junction	Dorsal (1)	Dev Tl10B	Dev Spn	ED Tl10B	ED Spn	Q9VHK3	pyd	1.00562e-08
adherens junction	Dorsal (1)	Dev Tl10B	Dev Spn	ED Tl10B	ED Spn	Q9VQ78	TBCD	1.00562e-08
adherens junction	Dorsal (1)	Dev Tl10B	Dev Spn	ED Tl10B	ED Spn	A1Z9J1	shot	1.00562e-08
adherens junction	Dorsal (1)	Dev Tl10B	Dev Spn	ED Tl10B	ED Spn	Q9VZQ3	kst	1.00562e-08
adherens junction	Dorsal (1)	Dev Tl10B	Dev Spn	ED Tl10B	ED Spn	Q9VHK3	pyd	6.27263e-05
adherens junction	Dorsal (1)	Dev Tl10B	Dev Spn	ED Tl10B	ED Spn	P07207	N	6.27263e-05
adherens junction	Dorsal (1)	Dev Tl10B	Dev Spn	ED Tl10B	ED Spn	Q9VTS8	rols	6.27263e-05
adherens junction	Dorsal (1)	Dev Tl10B	Dev Spn	ED Tl10B	ED Spn	Q9VN82	cno	6.27263e-05
adherens junction	Dorsal (1)	Dev Tl10B	Dev Spn	ED Tl10B	ED Spn	Q9VQ78	TBCD	6.27263e-05
adherens junction	Dorsal (1)	Dev Tl10B	Dev Spn	ED Tl10B	ED Spn	Q9VN82	cno	5.43059e-05
adherens junction	Dorsal (1)	Dev Tl10B	Dev Spn	ED Tl10B	ED Spn	Q9VHK3	pyd	5.43059e-05
adherens junction	Dorsal (1)	Dev Tl10B	Dev Spn	ED Tl10B	ED Spn	Q9VQ78	TBCD	5.43059e-05
adherens junction	Dorsal (1)	Dev Tl10B	Dev Spn	ED Tl10B	ED Spn	P07207	N	5.43059e-05
adherens junction	Dorsal (1)	Dev Tl10B	Dev Spn	ED Tl10B	ED Spn	Q9VTS8	rols	5.43059e-05
zonula adherens	Dorsal (1)	None	Dev Spn	ED Tl10B	ED Spn	P18824	arm	3.3432e-09
zonula adherens	Dorsal (1)	None	Dev Spn	ED Tl10B	ED Spn	Q24298	shg	3.3432e-09
zonula adherens	Dorsal (1)	None	Dev Spn	ED Tl10B	ED Spn	P07207	N	3.3432e-09
zonula adherens	Dorsal (1)	None	Dev Spn	ED Tl10B	ED Spn	Q9VZT7	Girdin	3.3432e-09
zonula adherens	Dorsal (1)	None	Dev Spn	ED Tl10B	ED Spn	Q9VN82	cno	3.3432e-09
zonula adherens	Dorsal (1)	None	Dev Spn	ED Tl10B	ED Spn	P07207	N	0.000181865
zonula adherens	Dorsal (1)	None	Dev Spn	ED Tl10B	ED Spn	Q9VN82	cno	0.000181865
zonula adherens	Dorsal (1)	None	Dev Spn	ED Tl10B	ED Spn	Q8SX64	Girdin	0.000181865
zonula adherens	Dorsal (1)	None	Dev Spn	ED Tl10B	ED Spn	Q8SX64	Girdin	0.00016642
zonula adherens	Dorsal (1)	None	Dev Spn	ED Tl10B	ED Spn	Q9VN82	cno	0.00016642
zonula adherens	Dorsal (1)	None	Dev Spn	ED Tl10B	ED Spn	P07207	N	0.00016642
membrane coat	Lateral (2)	Dev Tl10B	Dev Spn	None	None	P45437	betaCOP	0.00041283
membrane coat	Lateral (2)	Dev Tl10B	Dev Spn	None	None	Q8I0G5	gammaCOP	0.00041283
membrane coat	Lateral (2)	Dev Tl10B	Dev Spn	None	None	Q8I0G5	gammaCOP	0.000445544
membrane coat	Lateral (2)	Dev Tl10B	Dev Spn	None	None	P45437	betaCOP	0.000445544
COPI vesicle coat	Lateral (2)	Dev Tl10B	Dev Spn	None	None	P45437	betaCOP	0.000144478
COPI vesicle coat	Lateral (2)	Dev Tl10B	Dev Spn	None	None	Q8I0G5	gammaCOP	0.000144478
COPI vesicle coat	Lateral (2)	Dev Tl10B	Dev Spn	None	None	Q8I0G5	gammaCOP	0.000155975
COPI vesicle coat	Lateral (2)	Dev Tl10B	Dev Spn	None	None	P45437	betaCOP	0.000155975
COPI-coated vesicle membrane	Lateral (2)	Dev Tl10B	Dev Spn	None	None	P45437	betaCOP	3.30202e-05
COPI-coated vesicle membrane	Lateral (2)	Dev Tl10B	Dev Spn	None	None	Q8I0G5	gammaCOP	3.30202e-05
COPI-coated vesicle membrane	Lateral (2)	Dev Tl10B	Dev Spn	None	None	Q8I0G5	gammaCOP	3.56562e-05
COPI-coated vesicle membrane	Lateral (2)	Dev Tl10B	Dev Spn	None	None	P45437	betaCOP	3.56562e-05
cytoskeleton	Dorsal (1)	None	None	ED Tl10B	ED Spn	P13496	DCTN1-p150	0.000312912
cytoskeleton	Dorsal (1)	None	None	ED Tl10B	ED Spn	P20480	ncd	0.000312912
cytoskeleton	Dorsal (1)	None	None	ED Tl10B	ED Spn	P45889	Arp1	0.000312912
cytoskeleton	Dorsal (1)	None	None	ED Tl10B	ED Spn	P49455	Tm1	0.000312912
cytoskeleton	Dorsal (1)	None	None	ED Tl10B	ED Spn	P46863	Klp61F	0.000312912
cytoskeleton	Dorsal (1)	None	None	ED Tl10B	ED Spn	Q9VDW6	Dys	0.000312912
cytoskeleton	Dorsal (1)	None	None	ED Tl10B	ED Spn	Q9V9Y9	spn-F	0.000312912
cytoskeleton	Dorsal (1)	None	None	ED Tl10B	ED Spn	P46863	Klp61F	0.000259694
cytoskeleton	Dorsal (1)	None	None	ED Tl10B	ED Spn	P45889	Arp1	0.000259694
cytoskeleton	Dorsal (1)	None	None	ED Tl10B	ED Spn	Q9V9Y9	spn-F	0.000259694
cytoskeleton	Dorsal (1)	None	None	ED Tl10B	ED Spn	Q9VDW6	Dys	0.000259694
cytoskeleton	Dorsal (1)	None	None	ED Tl10B	ED Spn	P13496	DCTN1-p150	0.000259694
cytoskeleton	Dorsal (1)	None	None	ED Tl10B	ED Spn	P20480	ncd	0.000259694
cytoskeleton	Dorsal (1)	None	None	ED Tl10B	ED Spn	P49455	Tm1	0.000259694
cytoskeleton	Lateral (2)	None	None	ED Tl10B	ED Spn	Q9VU84	Abp1	2.1323e-05
cytoskeleton	Lateral (2)	None	None	ED Tl10B	ED Spn	Q7K3L1	mars	2.1323e-05
cytoskeleton	Lateral (2)	None	None	ED Tl10B	ED Spn	P42271	gammaTub37C	2.1323e-05
cytoskeleton	Lateral (2)	None	None	ED Tl10B	ED Spn	Q9VKU7	Grip75	2.1323e-05
cytoskeleton	Lateral (2)	None	None	ED Tl10B	ED Spn	P17210	Khc	2.1323e-05
cytoskeleton	Lateral (2)	None	None	ED Tl10B	ED Spn	P18105	nod	2.1323e-05
cytoskeleton	Lateral (2)	None	None	ED Tl10B	ED Spn	Q9VC45	asp	2.1323e-05
cytoskeleton	Lateral (2)	None	None	ED Tl10B	ED Spn	P42271	gammaTub37C	0.000119463
cytoskeleton	Lateral (2)	None	None	ED Tl10B	ED Spn	Q9VKU7	Grip75	0.000119463
cytoskeleton	Lateral (2)	None	None	ED Tl10B	ED Spn	P17210	Khc	0.000119463
cytoskeleton	Lateral (2)	None	None	ED Tl10B	ED Spn	Q7K3L1	mars	0.000119463
cytoskeleton	Lateral (2)	None	None	ED Tl10B	ED Spn	Q9VU84	Abp1	0.000119463
cytoskeleton	Lateral (2)	None	None	ED Tl10B	ED Spn	Q9VC45	asp	0.000119463
cytoskeleton	Ventral (5)	None	None	ED Tl10B	ED Spn	P20480	ncd	0.000325009
cytoskeleton	Ventral (5)	None	None	ED Tl10B	ED Spn	Q9VU84	Abp1	0.000325009
cytoskeleton	Ventral (5)	None	None	ED Tl10B	ED Spn	Q9W596	futsch	0.000325009
cytoskeleton	Ventral (5)	None	None	ED Tl10B	ED Spn	Q24560	betaTub56D	0.000325009
cytoskeleton	Ventral (5)	None	None	ED Tl10B	ED Spn	P20480	ncd	3.92365e-05
cytoskeleton	Ventral (5)	None	None	ED Tl10B	ED Spn	Q9VU84	Abp1	3.92365e-05
cytoskeleton	Ventral (5)	None	None	ED Tl10B	ED Spn	Q24560	betaTub56D	3.92365e-05
cytoskeleton	Ventral (5)	None	None	ED Tl10B	ED Spn	Q9VKN7	aurB	3.92365e-05
cytoskeleton	Ventral (5)	None	None	ED Tl10B	ED Spn	Q9W596	futsch	3.92365e-05
cytoskeleton	Lateral+Ventral (12)	None	None	ED Tl10B	ED Spn	P13496	DCTN1-p150	1.33151e-05
cytoskeleton	Lateral+Ventral (12)	None	None	ED Tl10B	ED Spn	Q9VKN7	aurB	1.33151e-05
cytoskeleton	Lateral+Ventral (12)	None	None	ED Tl10B	ED Spn	P45889	Arp1	1.33151e-05
cytoskeleton	Lateral+Ventral (12)	None	None	ED Tl10B	ED Spn	P18105	nod	1.33151e-05
cytoskeleton	Lateral+Ventral (12)	None	None	ED Tl10B	ED Spn	P17210	Khc	1.33151e-05
cytoskeleton	Lateral+Ventral (12)	None	None	ED Tl10B	ED Spn	P06605	alphaTub84D	1.33151e-05
cytoskeleton	Lateral+Ventral (12)	None	None	ED Tl10B	ED Spn	Q9XYP7	Grip84	1.33151e-05
cytoskeleton	Lateral+Ventral (12)	None	None	ED Tl10B	ED Spn	P13496	DCTN1-p150	1.33151e-05
cytoskeleton	Lateral+Ventral (12)	None	None	ED Tl10B	ED Spn	P17210	Khc	1.33151e-05
cytoskeleton	Lateral+Ventral (12)	None	None	ED Tl10B	ED Spn	Q9XYP7	Grip84	1.33151e-05
cytoskeleton	Lateral+Ventral (12)	None	None	ED Tl10B	ED Spn	P06605	alphaTub84D	1.33151e-05
cytoskeleton	Lateral+Ventral (12)	None	None	ED Tl10B	ED Spn	Q9VKN7	aurB	1.33151e-05
cytoskeleton	Lateral+Ventral (12)	None	None	ED Tl10B	ED Spn	P45889	Arp1	1.33151e-05
cytoskeleton	Lateral+Ventral (12)	None	None	ED Tl10B	ED Spn	P18105	nod	1.33151e-05
actin cap	Lateral+Ventral (12)	Dev Tl10B	None	ED Tl10B	ED Spn	P17210	Khc	0.00209735
actin cap	Lateral+Ventral (12)	Dev Tl10B	None	ED Tl10B	ED Spn	P17210	Khc	8.72605e-05
actin cap	Lateral+Ventral (12)	Dev Tl10B	None	ED Tl10B	ED Spn	A1ZAN6	RhoGEF2	8.72605e-05
actin cap	Lateral+Ventral (12)	Dev Tl10B	None	ED Tl10B	ED Spn	A1ZAN6	RhoGEF2	8.72605e-05
actin cap	Lateral+Ventral (12)	Dev Tl10B	None	ED Tl10B	ED Spn	P17210	Khc	8.72605e-05
microtubule	Lateral (2)	None	Dev Spn	ED Tl10B	ED Spn	Q24478	Cp190	0.000169523
microtubule	Lateral (2)	None	Dev Spn	ED Tl10B	ED Spn	P18105	nod	0.000169523
microtubule	Lateral (2)	None	Dev Spn	ED Tl10B	ED Spn	P06605	alphaTub84D	0.000169523
microtubule	Lateral (2)	None	Dev Spn	ED Tl10B	ED Spn	P17210	Khc	0.000169523
microtubule	Lateral (2)	None	Dev Spn	ED Tl10B	ED Spn	P52304	polo	8.86587e-06
microtubule	Lateral (2)	None	Dev Spn	ED Tl10B	ED Spn	P42271	gammaTub37C	8.86587e-06
microtubule	Lateral (2)	None	Dev Spn	ED Tl10B	ED Spn	Q9VKU7	Grip75	8.86587e-06
microtubule	Lateral (2)	None	Dev Spn	ED Tl10B	ED Spn	P17210	Khc	8.86587e-06
microtubule	Lateral (2)	None	Dev Spn	ED Tl10B	ED Spn	P18105	nod	8.86587e-06
microtubule	Lateral (2)	None	Dev Spn	ED Tl10B	ED Spn	Q9VC45	asp	8.86587e-06
microtubule	Lateral (2)	None	Dev Spn	ED Tl10B	ED Spn	P42271	gammaTub37C	7.95789e-05
microtubule	Lateral (2)	None	Dev Spn	ED Tl10B	ED Spn	Q9VKU7	Grip75	7.95789e-05
microtubule	Lateral (2)	None	Dev Spn	ED Tl10B	ED Spn	P52304	polo	7.95789e-05
microtubule	Lateral (2)	None	Dev Spn	ED Tl10B	ED Spn	P17210	Khc	7.95789e-05
microtubule	Lateral (2)	None	Dev Spn	ED Tl10B	ED Spn	Q9VC45	asp	7.95789e-05
microtubule	Lateral+Ventral (12)	Dev Tl10B	Dev Spn	ED Tl10B	ED Spn	P06605	alphaTub84D	0.000526839
microtubule	Lateral+Ventral (12)	Dev Tl10B	Dev Spn	ED Tl10B	ED Spn	P17210	Khc	0.000526839
microtubule	Lateral+Ventral (12)	Dev Tl10B	Dev Spn	ED Tl10B	ED Spn	P18105	nod	0.000526839
microtubule	Lateral+Ventral (12)	Dev Tl10B	Dev Spn	ED Tl10B	ED Spn	P18105	nod	0.00172314
microtubule	Lateral+Ventral (12)	Dev Tl10B	Dev Spn	ED Tl10B	ED Spn	P17210	Khc	0.00172314
microtubule	Lateral+Ventral (12)	Dev Tl10B	Dev Spn	ED Tl10B	ED Spn	P13496	DCTN1-p150	8.95399e-05
microtubule	Lateral+Ventral (12)	Dev Tl10B	Dev Spn	ED Tl10B	ED Spn	P18105	nod	8.95399e-05
microtubule	Lateral+Ventral (12)	Dev Tl10B	Dev Spn	ED Tl10B	ED Spn	P17210	Khc	8.95399e-05
microtubule	Lateral+Ventral (12)	Dev Tl10B	Dev Spn	ED Tl10B	ED Spn	P06605	alphaTub84D	8.95399e-05
microtubule	Lateral+Ventral (12)	Dev Tl10B	Dev Spn	ED Tl10B	ED Spn	Q9XYP7	Grip84	8.95399e-05
microtubule	Lateral+Ventral (12)	Dev Tl10B	Dev Spn	ED Tl10B	ED Spn	P13496	DCTN1-p150	8.95399e-05
microtubule	Lateral+Ventral (12)	Dev Tl10B	Dev Spn	ED Tl10B	ED Spn	P17210	Khc	8.95399e-05
microtubule	Lateral+Ventral (12)	Dev Tl10B	Dev Spn	ED Tl10B	ED Spn	Q9XYP7	Grip84	8.95399e-05
microtubule	Lateral+Ventral (12)	Dev Tl10B	Dev Spn	ED Tl10B	ED Spn	P06605	alphaTub84D	8.95399e-05
microtubule	Lateral+Ventral (12)	Dev Tl10B	Dev Spn	ED Tl10B	ED Spn	P18105	nod	8.95399e-05
centrosome	Dorsal (1)	None	Dev Spn	ED Tl10B	ED Spn	P20439	CycB	1.14413e-07
centrosome	Dorsal (1)	None	Dev Spn	ED Tl10B	ED Spn	Q9VIF5	del	1.14413e-07
centrosome	Dorsal (1)	None	Dev Spn	ED Tl10B	ED Spn	Q9NBD7	chb	1.14413e-07
centrosome	Dorsal (1)	None	Dev Spn	ED Tl10B	ED Spn	Q9VY43	mud	1.14413e-07
centrosome	Dorsal (1)	None	Dev Spn	ED Tl10B	ED Spn	Q9VZT7	Girdin	1.14413e-07
centrosome	Dorsal (1)	None	Dev Spn	ED Tl10B	ED Spn	A1ZAU8	Patronin	1.14413e-07
centrosome	Dorsal (1)	None	Dev Spn	ED Tl10B	ED Spn	Q24044	fzy	1.14413e-07
centrosome	Dorsal (1)	None	Dev Spn	ED Tl10B	ED Spn	Q9VMS5	Bub1	4.42181e-08
centrosome	Dorsal (1)	None	Dev Spn	ED Tl10B	ED Spn	P13496	DCTN1-p150	4.42181e-08
centrosome	Dorsal (1)	None	Dev Spn	ED Tl10B	ED Spn	Q9I7U5	Cnb	4.42181e-08
centrosome	Dorsal (1)	None	Dev Spn	ED Tl10B	ED Spn	Q8SX64	Girdin	4.42181e-08
centrosome	Dorsal (1)	None	Dev Spn	ED Tl10B	ED Spn	P20480	ncd	4.42181e-08
centrosome	Dorsal (1)	None	Dev Spn	ED Tl10B	ED Spn	P45889	Arp1	4.42181e-08
centrosome	Dorsal (1)	None	Dev Spn	ED Tl10B	ED Spn	Q9VSZ4	Dmel\CG3437	4.42181e-08
centrosome	Dorsal (1)	None	Dev Spn	ED Tl10B	ED Spn	P20439	CycB	4.42181e-08
centrosome	Dorsal (1)	None	Dev Spn	ED Tl10B	ED Spn	Q24044	fzy	4.42181e-08
centrosome	Dorsal (1)	None	Dev Spn	ED Tl10B	ED Spn	Q24044	fzy	3.38293e-08
centrosome	Dorsal (1)	None	Dev Spn	ED Tl10B	ED Spn	P45889	Arp1	3.38293e-08
centrosome	Dorsal (1)	None	Dev Spn	ED Tl10B	ED Spn	Q9VSZ4	Dmel\CG3437	3.38293e-08
centrosome	Dorsal (1)	None	Dev Spn	ED Tl10B	ED Spn	Q9I7U5	Cnb	3.38293e-08
centrosome	Dorsal (1)	None	Dev Spn	ED Tl10B	ED Spn	Q8SX64	Girdin	3.38293e-08
centrosome	Dorsal (1)	None	Dev Spn	ED Tl10B	ED Spn	Q9VMS5	Bub1	3.38293e-08
centrosome	Dorsal (1)	None	Dev Spn	ED Tl10B	ED Spn	P13496	DCTN1-p150	3.38293e-08
centrosome	Dorsal (1)	None	Dev Spn	ED Tl10B	ED Spn	P20480	ncd	3.38293e-08
centrosome	Dorsal (1)	None	Dev Spn	ED Tl10B	ED Spn	P20439	CycB	3.38293e-08
centrosome	Lateral (2)	None	None	ED Tl10B	ED Spn	Q9VTS3	Grip163	4.69101e-07
centrosome	Lateral (2)	None	None	ED Tl10B	ED Spn	P52304	polo	4.69101e-07
centrosome	Lateral (2)	None	None	ED Tl10B	ED Spn	Q9VI72	Sas-4	4.69101e-07
centrosome	Lateral (2)	None	None	ED Tl10B	ED Spn	P42271	gammaTub37C	4.69101e-07
centrosome	Lateral (2)	None	None	ED Tl10B	ED Spn	Q24044	fzy	4.69101e-07
centrosome	Lateral (2)	None	None	ED Tl10B	ED Spn	Q9VKU7	Grip75	4.69101e-07
centrosome	Lateral (2)	None	None	ED Tl10B	ED Spn	Q9VC45	asp	4.69101e-07
centrosome	Lateral (2)	None	None	ED Tl10B	ED Spn	P42271	gammaTub37C	4.6234e-06
centrosome	Lateral (2)	None	None	ED Tl10B	ED Spn	Q9VKU7	Grip75	4.6234e-06
centrosome	Lateral (2)	None	None	ED Tl10B	ED Spn	Q9VI72	Sas-4	4.6234e-06
centrosome	Lateral (2)	None	None	ED Tl10B	ED Spn	P52304	polo	4.6234e-06
centrosome	Lateral (2)	None	None	ED Tl10B	ED Spn	Q9VTS3	Grip163	4.6234e-06
centrosome	Lateral (2)	None	None	ED Tl10B	ED Spn	Q9VC45	asp	4.6234e-06
microtubule organizing center	Lateral (2)	None	None	ED Tl10B	ED Spn	Q9VKU7	Grip75	0.000110569
microtubule organizing center	Lateral (2)	None	None	ED Tl10B	ED Spn	Q9VTS3	Grip163	0.000110569
microtubule organizing center	Lateral (2)	None	None	ED Tl10B	ED Spn	P42271	gammaTub37C	0.000110569
microtubule organizing center	Lateral (2)	None	None	ED Tl10B	ED Spn	Q9VC45	asp	0.000110569
microtubule organizing center	Lateral (2)	None	None	ED Tl10B	ED Spn	P42271	gammaTub37C	7.64353e-05
microtubule organizing center	Lateral (2)	None	None	ED Tl10B	ED Spn	Q9VKU7	Grip75	7.64353e-05
microtubule organizing center	Lateral (2)	None	None	ED Tl10B	ED Spn	Q9VC45	asp	7.64353e-05
microtubule organizing center	Lateral (2)	None	None	ED Tl10B	ED Spn	Q9VTS3	Grip163	7.64353e-05
gamma-tubulin complex	Lateral (2)	None	None	ED Tl10B	ED Spn	Q9VKU7	Grip75	3.65177e-06
gamma-tubulin complex	Lateral (2)	None	None	ED Tl10B	ED Spn	Q9VTS3	Grip163	3.65177e-06
gamma-tubulin complex	Lateral (2)	None	None	ED Tl10B	ED Spn	P42271	gammaTub37C	3.65177e-06
gamma-tubulin complex	Lateral (2)	None	None	ED Tl10B	ED Spn	P42271	gammaTub37C	2.74766e-06
gamma-tubulin complex	Lateral (2)	None	None	ED Tl10B	ED Spn	Q9VKU7	Grip75	2.74766e-06
gamma-tubulin complex	Lateral (2)	None	None	ED Tl10B	ED Spn	Q9VTS3	Grip163	2.74766e-06
gamma-tubulin ring complex	Lateral (2)	None	None	ED Tl10B	ED Spn	Q9VKU7	Grip75	3.3566e-07
gamma-tubulin ring complex	Lateral (2)	None	None	ED Tl10B	ED Spn	Q9VTS3	Grip163	3.3566e-07
gamma-tubulin ring complex	Lateral (2)	None	None	ED Tl10B	ED Spn	Q9VJ57	Grip71	3.3566e-07
gamma-tubulin ring complex	Lateral (2)	None	None	ED Tl10B	ED Spn	Q9VJ57	Grip71	2.52292e-07
gamma-tubulin ring complex	Lateral (2)	None	None	ED Tl10B	ED Spn	Q9VKU7	Grip75	2.52292e-07
gamma-tubulin ring complex	Lateral (2)	None	None	ED Tl10B	ED Spn	Q9VTS3	Grip163	2.52292e-07
kinesin complex	Dorsal (1)	None	None	ED Tl10B	ED Spn	P20480	ncd	2.72151e-05
kinesin complex	Dorsal (1)	None	None	ED Tl10B	ED Spn	Q9W3Y7	Pat1	2.72151e-05
kinesin complex	Dorsal (1)	None	None	ED Tl10B	ED Spn	P46863	Klp61F	2.72151e-05
kinesin complex	Dorsal (1)	None	None	ED Tl10B	ED Spn	Q9XZ29	Klp3A	2.72151e-05
kinesin complex	Dorsal (1)	None	None	ED Tl10B	ED Spn	Q9XZ29	Klp3A	2.4175e-05
kinesin complex	Dorsal (1)	None	None	ED Tl10B	ED Spn	P46863	Klp61F	2.4175e-05
kinesin complex	Dorsal (1)	None	None	ED Tl10B	ED Spn	Q9W3Y7	Pat1	2.4175e-05
kinesin complex	Dorsal (1)	None	None	ED Tl10B	ED Spn	P20480	ncd	2.4175e-05
kinesin complex	Lateral+Ventral (12)	Dev Tl10B	Dev Spn	None	None	P17210	Khc	0.000661135
kinesin complex	Lateral+Ventral (12)	Dev Tl10B	Dev Spn	None	None	P18105	nod	0.000661135
kinesin complex	Lateral+Ventral (12)	Dev Tl10B	Dev Spn	None	None	P18105	nod	9.58452e-05
kinesin complex	Lateral+Ventral (12)	Dev Tl10B	Dev Spn	None	None	P17210	Khc	9.58452e-05
