# Supplementary material for: Differential regulation of the proteome and phosphoproteome along the dorso-ventral axis of the early Drosophila embryo
Source: eLife. 2024 Sep 2;13:e99263. doi: 10.7554/eLife.99263 (PMC11466282; doi:10.7554/eLife.99263)
Supplement: Supplementary file 13. [file elife-99263-supp13.xlsx]

## Sheet: LFQ_Proteome_ExtremeDeviation
LFQ_ID	FBGN (for ontology query)	Extreme Deviation DLVtl	Extreme Deviation DLVsp
13	FBgn0261838	-1.08585	-1.1006
66	FBgn0010015	1.28812	1.1916
69	FBgn0013995	1.60691	1.4665
80	FBgn0033739	1.6007	1.70159
103	FBgn0015513	-1.44126	-1.46411
186	FBgn0011740	1.12404	1.24024
287	FBgn0039186	2.00234	1.85597
294	FBgn0039254	1.05911	1.11607
298	FBgn0040212	1.62631	1.52642
313	FBgn0026597	2.4163	2.23429
355	FBgn0050489	-1.29814	-1.30226
362	FBgn0261625	2.54969	2.66334
369	FBgn0033987	1.6348	1.5975
444	FBgn0051460	1.62783	1.77143
447	FBgn0034470	1.72065	1.63863
472	FBgn0037384	1.39581	1.24997
490	FBgn0034970	1.34245	1.07937
498	FBgn0260398	-3.72796	-3.49875
508	FBgn0261444	1.91423	1.99488
538	FBgn0286203	1.53077	1.62553
546	FBgn0033052	1.25623	1.19911
563	FBgn0003082	1.9018	2.09079
658	FBgn0050077	1.28416	1.33805
668	FBgn0034059	2.0692	2.03415
673	FBgn0034098	1.11495	1.18849
675	FBgn0050100	1.72641	1.33955
677	FBgn0034126	-2.71642	-2.4816
678	FBgn0025830	1.19654	1.10679
681	FBgn0034172	1.06828	1.1399
703	FBgn0063492	2.34931	2.35561
723	FBgn0034511	2.24552	1.27809
745	FBgn0011818	1.55651	1.59719
775	FBgn0039668	1.27263	1.26738
776	FBgn0039714	1.43981	1.10978
783	FBgn0029849	1.05092	1.34341
846	FBgn0025807	-1.44796	-1.22179
852	FBgn0026239	3.15504	2.97275
858	FBgn0259231	3.73773	4.25464
863	FBgn0085362	1.15761	1.10861
864	FBgn0040388	1.21627	1.19791
888	FBgn0037106	1.19413	1.12473
975	FBgn0030357	-1.14604	-1.27089
989	FBgn0000592	-1.42462	-1.15907
1097	FBgn0032922	1.37928	1.64143
1107	FBgn0000414	1.92766	1.8987
1245	FBgn0051716	-1.2515	-1.08342
1349	FBgn0041004	2.25288	2.13295
1401	FBgn0053126	-1.20129	-1.05112
1403	FBgn0031282	2.0119	1.97695
1410	FBgn0259173	-1.82989	-1.77804
1419	FBgn0031519	1.2529	1.44434
1456	FBgn0031752	1.04553	1.18086
1498	FBgn0023540	1.29774	1.33437
1523	FBgn0035432	-1.07223	-1.67035
1532	FBgn0035989	1.32006	1.14055
1538	FBgn0035953	1.84433	2.05384
1601	FBgn0023511	1.09293	1.18373
1604	FBgn0024983	1.15061	1.44403
1614	FBgn0040372	1.309	1.28941
1624	FBgn0004102	1.43341	1.38664
1627	FBgn0003964	1.69594	1.81404
1753	FBgn0025111	1.54228	1.77286
1818	FBgn0001230	-2.05787	-1.67354
1829	FBgn0013675	-1.31941	-1.5001
1830	FBgn0013676	1.20737	1.15817
1851	FBgn0284249	-1.0546	-1.08697
1931	FBgn0001149	-1.05444	-1.16412
1947	FBgn0000356	-1.49569	-1.51212
1961	FBgn0000927	1.67371	1.97039
1987	FBgn0001216	-2.92656	-2.68657
1989	FBgn0014143	1.80847	2.16033
2066	FBgn0005617	1.25714	1.25539
2082	FBgn0000044	-1.24006	-1.1811
2157	FBgn0036493	2.95301	4.30537
2191	FBgn0033159	1.83009	1.48429
2208	FBgn0039510	-1.68656	-1.74687
2224	FBgn0016070	1.48134	1.4799
2278	FBgn0015553	5.4555	5.52424
2302	FBgn0038244	-1.23271	-1.2103
2328	FBgn0002887	1.76388	1.8957
2333	FBgn0039149	-1.22643	-1.5211
2343	FBgn0033934	-1.57075	-1.66826
2359	FBgn0025388	-1.05928	-1.14184
2363	FBgn0033836	1.18468	1.2656
2412	FBgn0043578	1.4894	1.13692
2413	FBgn0067622	1.70514	1.70639
2458	FBgn0033928	-1.34329	-1.56542
2465	FBgn0033528	1.82872	2.00288
2515	FBgn0034576	-1.80344	-1.57719
2528	FBgn0034058	1.07974	1.22814
2540	FBgn0033357	1.49485	1.23567
2570	FBgn0034360	-1.29016	-1.12972
2575	FBgn0030330	1.97572	1.84388
2590	FBgn0034406	-1.03966	-1.20668
2625	FBgn0031313	-1.29446	-1.27554
2752	FBgn0037638	1.60093	1.8274
2767	FBgn0032120	-1.68519	-1.82453
2776	FBgn0037336	-1.71381	-1.52945
2834	FBgn0039966	1.20621	1.20156
2849	FBgn0029893	1.9998	1.78722
2867	FBgn0032077	1.16133	1.15728
2915	FBgn0051439	2.13919	2.15225
2931	FBgn0028396	1.84933	1.68705
2952	FBgn0051674	-1.73432	-3.64707
2957	FBgn0051812	1.8307	-1.13422
3015	FBgn0053052	-1.14417	-1.27736
3032	FBgn0052251	1.43971	1.33308
3033	FBgn0052267	-1.59256	-1.36006
3038	FBgn0052282	1.50124	1.36161
3075	FBgn0020416	1.08173	1.06707
3120	FBgn0033483	1.90229	1.84509
3127	FBgn0052243	-1.34395	-1.20328
3139	FBgn0033665	1.39688	1.22275
3144	FBgn0039265	1.16146	1.24652
3155	FBgn0265178	-1.38413	-1.49624
3252	FBgn0036121	-1.28689	-1.68852
3261	FBgn0051717	1.52542	1.6529
3287	FBgn0052064	-1.56111	-1.56667
3345	FBgn0037250	-1.52608	-1.34495
3494	FBgn0028541	6.66388	6.80918
3543	FBgn0027784	1.61853	1.2479
3592	FBgn0031049	1.73596	1.69607
3666	FBgn0039732	1.38646	1.51601
3723	FBgn0053213	1.19482	1.15729
3740	FBgn0039508	1.05888	1.07298
3770	FBgn0039357	-1.89664	-2.03875
3779	FBgn0039336	1.37113	1.43829
3914	FBgn0040582	2.75338	1.97246
3935	FBgn0038861	1.79332	1.77762
3983	FBgn0038681	-2.50668	-3.46606
4003	FBgn0010877	1.68332	1.41574
4087	FBgn0038327	1.70348	1.94685
4089	FBgn0038325	1.33399	1.29348
4106	FBgn0038291	-2.78057	-3.50041
4107	FBgn0038279	1.34	1.13439
4117	FBgn0038243	-1.481	-1.50319
4168	FBgn0286075	1.94828	1.97689
4169	FBgn0038028	-1.27854	-1.2429
4171	FBgn0010039	-1.14725	-1.18752
4183	FBgn0037975	-1.52661	-2.07897
4215	FBgn0026315	-1.15355	-1.65906
4275	FBgn0043791	-1.16514	-1.24108
4276	FBgn0037696	1.09447	1.35489
4299	FBgn0037646	1.18768	1.10206
4345	FBgn0037513	-2.15339	-2.4315
4363	FBgn0037492	1.13585	1.26497
4425	FBgn0032775	2.02245	2.05155
4450	FBgn0032715	1.31422	1.4147
4463	FBgn0085370	1.2381	1.26815
4484	FBgn0028506	1.28954	1.16766
4490	FBgn0028926	1.18963	1.07382
4517	FBgn0032472	1.9252	1.4406
4545	FBgn0032394	1.17264	1.32276
4566	FBgn0032339	1.13868	1.22308
4567	FBgn0032335	1.7281	1.75785
4578	FBgn0032296	1.26904	1.40872
4615	FBgn0032196	1.36202	1.25941
4643	FBgn0032117	-1.18025	-1.0787
4649	FBgn0085470	1.2681	1.22658
4651	FBgn0032052	-1.43824	-1.17673
4661	FBgn0032032	1.29205	1.42305
4666	FBgn0032018	-1.47898	-1.3409
4682	FBgn0031988	1.36986	1.45843
4721	FBgn0051633	-1.15659	-1.19228
4750	FBgn0031741	2.38645	2.51366
4767	FBgn0031678	3.04322	3.10168
4801	FBgn0037299	1.52938	1.36466
4836	FBgn0037379	1.96303	1.96088
4918	FBgn0086912	1.08473	1.06247
4965	FBgn0040715	1.30443	1.33427
5098	FBgn0035689	2.26905	2.25062
5182	FBgn0035986	1.73204	1.57887
5248	FBgn0036254	1.38156	1.65696
5290	FBgn0036374	1.55412	1.64189
5303	FBgn0003459	1.59275	1.54763
5383	FBgn0036715	1.89781	1.98258
5385	FBgn0040793	-2.0441	-1.97666
5439	FBgn0036893	1.87324	1.49957
5497	FBgn0030991	1.61031	1.79147
5523	FBgn0022355	2.13592	1.63853
5544	FBgn0030851	2.00393	1.61394
5549	FBgn0030828	-1.30328	-1.39886
5579	FBgn0030744	1.40563	1.26432
5735	FBgn0030262	1.11859	1.40375
5739	FBgn0030245	1.2575	1.50425
5754	FBgn0261952	1.64367	1.26067
5756	FBgn0035523	-1.22263	-1.12433
5804	FBgn0016794	1.56494	1.5448
5863	FBgn0035150	-2.20884	-2.39413
5923	FBgn0034933	1.54407	1.48863
5924	FBgn0034931	1.88805	1.76499
5948	FBgn0034849	-2.01503	-1.96941
5966	FBgn0034748	-1.60986	-1.83702
6008	FBgn0034599	1.40524	1.29161
6028	FBgn0083167	-1.5215	-1.44804
6034	FBgn0026415	2.41509	2.46587
6035	FBgn0030160	1.05061	1.06637
6051	FBgn0030105	-2.3716	-2.59717
6054	FBgn0040931	-1.1397	-1.47407
6102	FBgn0029975	1.12891	1.30053
6112	FBgn0029942	1.7713	1.70805
6142	FBgn0029874	1.39535	1.72654
6147	FBgn0029866	1.45753	1.5119
6148	FBgn0029861	1.10317	1.0829
6207	FBgn0028491	3.02938	3.05988
6248	FBgn0264449	-1.13432	-1.13303

## Sheet: Phospho_ExtremeDeviation
Phosphosite_ID	FBGN (for ontology query)	Extreme Deviation DLVtl	Extreme Deviation DLVsp
57	FBgn0026620	1.15127	1.03366
99	FBgn0001139	1.15129	1.05688
160	FBgn0013576	-1.05852	-1.11299
169	FBgn0013576	-0.997169	-1.01422
214	FBgn0022981	2.62194	2.61977
215	FBgn0022981	1.39919	1.40058
256	FBgn0039149	1.24745	1.3669
257	FBgn0039149	1.24745	1.3669
402	FBgn0023172	1.47883	1.4792
641	FBgn0086372	2.03794	1.87888
689	FBgn0028408	-1.0718	-1.08307
690	FBgn0028408	-0.995583	-1.01855
691	FBgn0028408	-1.16367	-1.19163
823	FBgn0038872	-2.22134	-2.39434
957	FBgn0039065	-1.21205	-1.23896
1140	FBgn0033951	-1.27838	-1.50902
1310	FBgn0283536	1.03441	1.07751
1326	FBgn0000150	1.09517	1.102
1398	FBgn0037624	-1.22295	-1.08828
1407	FBgn0027497	-1.5413	-1.76249
1510	FBgn0023171	1.56649	1.09911
1526	FBgn0033380	-1.19037	-1.18701
1741	FBgn0050122	3.05392	3.05986
1770	FBgn0260934	-1.07614	-1.11163
1956	FBgn0031374	-1.1618	-1.18945
2145	FBgn0061200	-1.07582	-1.10381
2238	FBgn0266557	-1.91283	-1.92446
2397	FBgn0250754	-0.986024	-0.999438
2496	FBgn0030274	2.23029	2.00641
2497	FBgn0030274	2.23029	2.00641
2780	FBgn0003218	-1.41676	-1.36044
2815	FBgn0020261	-1.29813	-1.25847
2818	FBgn0031118	1.12323	1.07142
3146	FBgn0261570	2.76395	2.76327
3233	FBgn0011202	1.54398	1.46372
3245	FBgn0026259	1.14149	1.20186
3267	FBgn0005536	1.39505	1.37381
3290	FBgn0032341	-2.51279	-2.54403
3796	FBgn0041775	-1.24292	-1.11109
3815	FBgn0011272	1.27148	1.29035
3855	FBgn0037137	1.57806	1.56502
3856	FBgn0037137	1.46565	1.53192
3862	FBgn0037137	1.15315	1.09338
3865	FBgn0037137	0.992687	1.1765
3906	FBgn0037137	1.58798	1.71728
4171	FBgn0014340	-1.45605	-1.43094
4212	FBgn0015797	1.48657	1.46583
4319	FBgn0028741	1.46636	1.26819
4345	FBgn0001226	1.25799	1.28456
4360	FBgn0004045	-1.09374	-1.03949
4402	FBgn0002914	-1.13337	-1.15549
4459	FBgn0003079	-1.83668	-1.70839
4460	FBgn0003079	-1.83668	-1.70839
4561	FBgn0004419	-0.984394	-0.983221
4658	FBgn0004913	1.35468	1.26398
4677	FBgn0004913	-0.989914	-1.10665
4711	FBgn0011710	-1.37597	-1.39629
4713	FBgn0283521	-1.24883	-1.37147
4812	FBgn0045073	-1.35596	-1.2473
4834	FBgn0020238	1.26116	1.24287
4875	FBgn0010282	1.27997	1.24938
4961	FBgn0015622	-2.64366	-2.45742
4982	FBgn0001086	1.63438	1.71575
5116	FBgn0004698	-1.16522	-1.02114
5147	FBgn0025836	1.10871	0.993712
5230	FBgn0014163	-1.10814	-1.28542
5252	FBgn0040022	1.98515	2.03717
5282	FBgn0033557	1.09476	1.1181
5390	FBgn0033916	-1.10577	-1.3244
5489	FBgn0034086	-1.20234	-1.1549
5529	FBgn0034368	-1.49136	-1.0006
5531	FBgn0034368	2.3573	2.35372
5597	FBgn0284257	-1.40826	-1.79662
5598	FBgn0284257	-1.72677	-1.61605
5648	FBgn0027499	-1.01462	-1.07617
5676	FBgn0027548	-2.5306	-2.49128
5815	FBgn0053526	-2.01995	-2.08192
5833	FBgn0016983	1.2025	1.18739
5839	FBgn0016983	1.58748	1.71989
5840	FBgn0016983	1.58748	1.71989
6012	FBgn0027932	-1.47602	-1.34434
6016	FBgn0027932	-1.42411	-1.32535
6034	FBgn0036574	-1.04894	-1.01562
6035	FBgn0036574	-1.08204	-1.04795
6077	FBgn0032979	-1.21781	-1.19623
6150	FBgn0037810	1.43504	1.43967
6211	FBgn0037810	-2.54718	-2.54755
6390	FBgn0035213	1.58866	1.57165
6451	FBgn0036915	3.61071	3.42504
6629	FBgn0031115	1.23562	1.05343
6674	FBgn0019637	-1.35441	-1.35144
6698	FBgn0019637	-1.08475	-1.06874
6699	FBgn0019637	-1.30885	-1.3846
6700	FBgn0019637	-1.51071	-1.57044
6744	FBgn0037655	-1.17346	-1.18464
6848	FBgn0002891	1.08962	1.16975
6914	FBgn0027872	1.41505	1.27062
6988	FBgn0028471	-2.53989	-2.56744
7048	FBgn0001977	-1.22725	-1.09893
7063	FBgn0028686	0.99713	1.02583
7131	FBgn0067779	-1.70664	-1.47076
7146	FBgn0039920	1.00868	1.20782
7213	FBgn0027620	1.16398	1.1199
7241	FBgn0010808	-1.26715	-1.31336
7304	FBgn0039638	3.01668	2.81496
7308	FBgn0039601	-1.05571	-1.07308
7417	FBgn0039302	1.21702	1.22442
7466	FBgn0020626	1.06834	1.09726
7499	FBgn0000140	-1.15669	-1.19355
7655	FBgn0039117	1.38222	1.328
7744	FBgn0038862	1.17913	1.15409
7760	FBgn0026056	-1.24093	-1.31131
7761	FBgn0026056	-1.1445	-1.2311
7918	FBgn0008646	2.35968	2.36645
7936	FBgn0283438	1.01849	0.983041
7966	FBgn0286075	1.44679	1.15617
8035	FBgn0037760	1.05454	1.03043
8208	FBgn0032929	-1.47491	-1.62378
8374	FBgn0032518	-1.49008	-1.62437
8826	FBgn0037377	-1.10975	-1.01999
8916	FBgn0002931	1.06438	0.987675
8924	FBgn0031233	1.34823	1.45344
8934	FBgn0086912	1.58455	1.49197
8960	FBgn0031267	-1.41964	-1.41793
9074	FBgn0000227	-1.47067	-1.37534
9141	FBgn0260936	-0.992097	-1.05472
9173	FBgn0035766	1.45189	1.26805
9229	FBgn0035981	1.71893	1.69778
9258	FBgn0027567	-1.29498	-1.41285
9260	FBgn0027567	1.18977	0.993001
9282	FBgn0036058	-1.10193	-1.11618
9345	FBgn0036254	1.26641	1.38927
9356	FBgn0264848	-1.41412	-1.33614
9404	FBgn0036340	1.41873	1.47028
9429	FBgn0036365	1.05178	1.01464
9494	FBgn0266452	-1.13952	-1.16761
9555	FBgn0036624	1.24631	1.18368
9556	FBgn0036624	1.49921	1.37694
9847	FBgn0030854	-0.983911	-1.03883
9859	FBgn0030805	1.95688	1.97683
10065	FBgn0030328	-1.17674	-1.19454
10104	FBgn0030301	2.57577	2.50989
10140	FBgn0030276	-1.21452	-1.22187
10198	FBgn0044452	-1.64809	-1.83113
10248	FBgn0267487	1.5409	1.97762
10288	FBgn0035063	-2.26168	-2.39313
10289	FBgn0035063	-2.26168	-2.39313
10292	FBgn0035036	-1.07063	-1.14446
10523	FBgn0028342	-1.35336	-1.21423
10550	FBgn0260789	-1.0659	-1.03885
10578	FBgn0030054	-1.25037	-1.38643
10579	FBgn0030054	3.74412	3.91295
10580	FBgn0030054	1.99924	2.50932
10581	FBgn0030054	1.23349	2.07778
10642	FBgn0029941	1.36571	1.23323
10826	FBgn0024992	-2.59031	-2.31602
10900	FBgn0040011	1.12215	1.09385
10961	FBgn0086129	-1.19515	-1.14922
10969	FBgn0086129	-1.33076	-1.21031
11019	FBgn0050085	-1.01041	-1.06336
11029	FBgn0026751	-1.08895	-1.23072
11033	FBgn0026751	-2.51459	-2.1568
11073	FBgn0283467	0.995362	1.03845
11074	FBgn0283467	-1.07599	-1.53036
11286	FBgn0259682	1.31737	1.3165
11498	FBgn0010328	-1.15038	-1.03015
11499	FBgn0010328	1.2461	1.20417
11814	FBgn0053113	-0.982704	-1.01051
11891	FBgn0004108	-1.32186	-1.30949
11959	FBgn0004401	-1.49121	-1.5494
12056	FBgn0014133	-2.33665	-2.37664
12106	FBgn0022772	1.22902	1.15617
12168	FBgn0005642	1.09192	1.13764
12311	FBgn0015773	1.26217	1.43179
12312	FBgn0015773	1.26217	1.43179
12327	FBgn0035021	-1.01231	-1.11554
12524	FBgn0037810	5.87839	5.87685
12620	FBgn0011640	-1.64531	-1.97014
12676	FBgn0027872	1.52733	1.37741
12712	FBgn0261385	1.47191	1.43691
12750	FBgn0039654	-4.92182	-5.05212
12787	FBgn0000140	-0.987465	-0.998119
12813	FBgn0039023	-1.12952	-1.1328
12847	FBgn0038478	1.1022	1.05543
12886	FBgn0037700	-1.07306	-1.05436
12899	FBgn0037580	1.00558	1.1003
12912	FBgn0026577	1.04666	1.01446
13124	FBgn0035688	1.14642	1.14147
13210	FBgn0036804	-1.03566	-1.02685
13452	FBgn0023514	1.23763	1.2216
13528	FBgn0264959	2.55727	2.53813
