# Supplementary figures and images for: Differential regulation of the proteome and phosphoproteome along the dorso-ventral axis of the early Drosophila embryo
Source: eLife journal article supplement (doi:10.7554/elife.99263), 2024-09-02

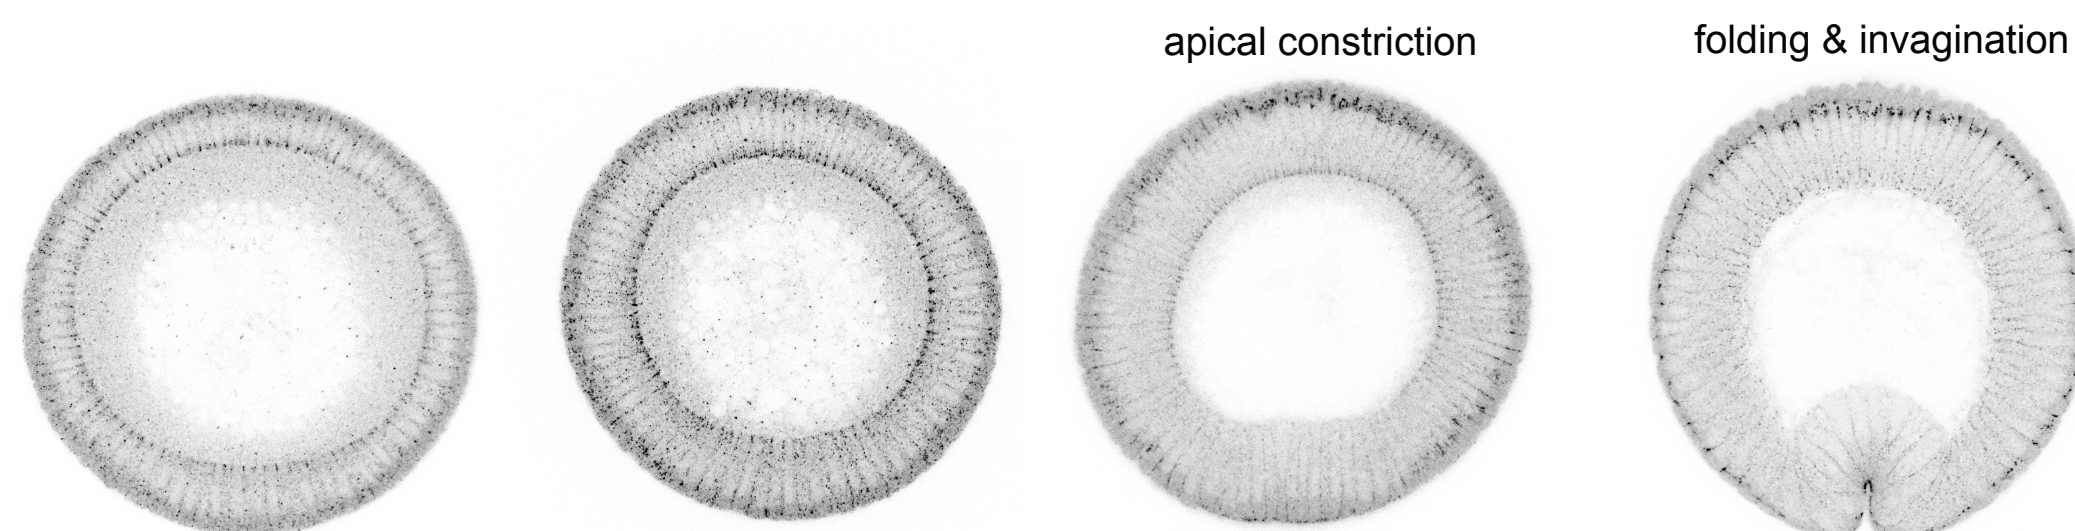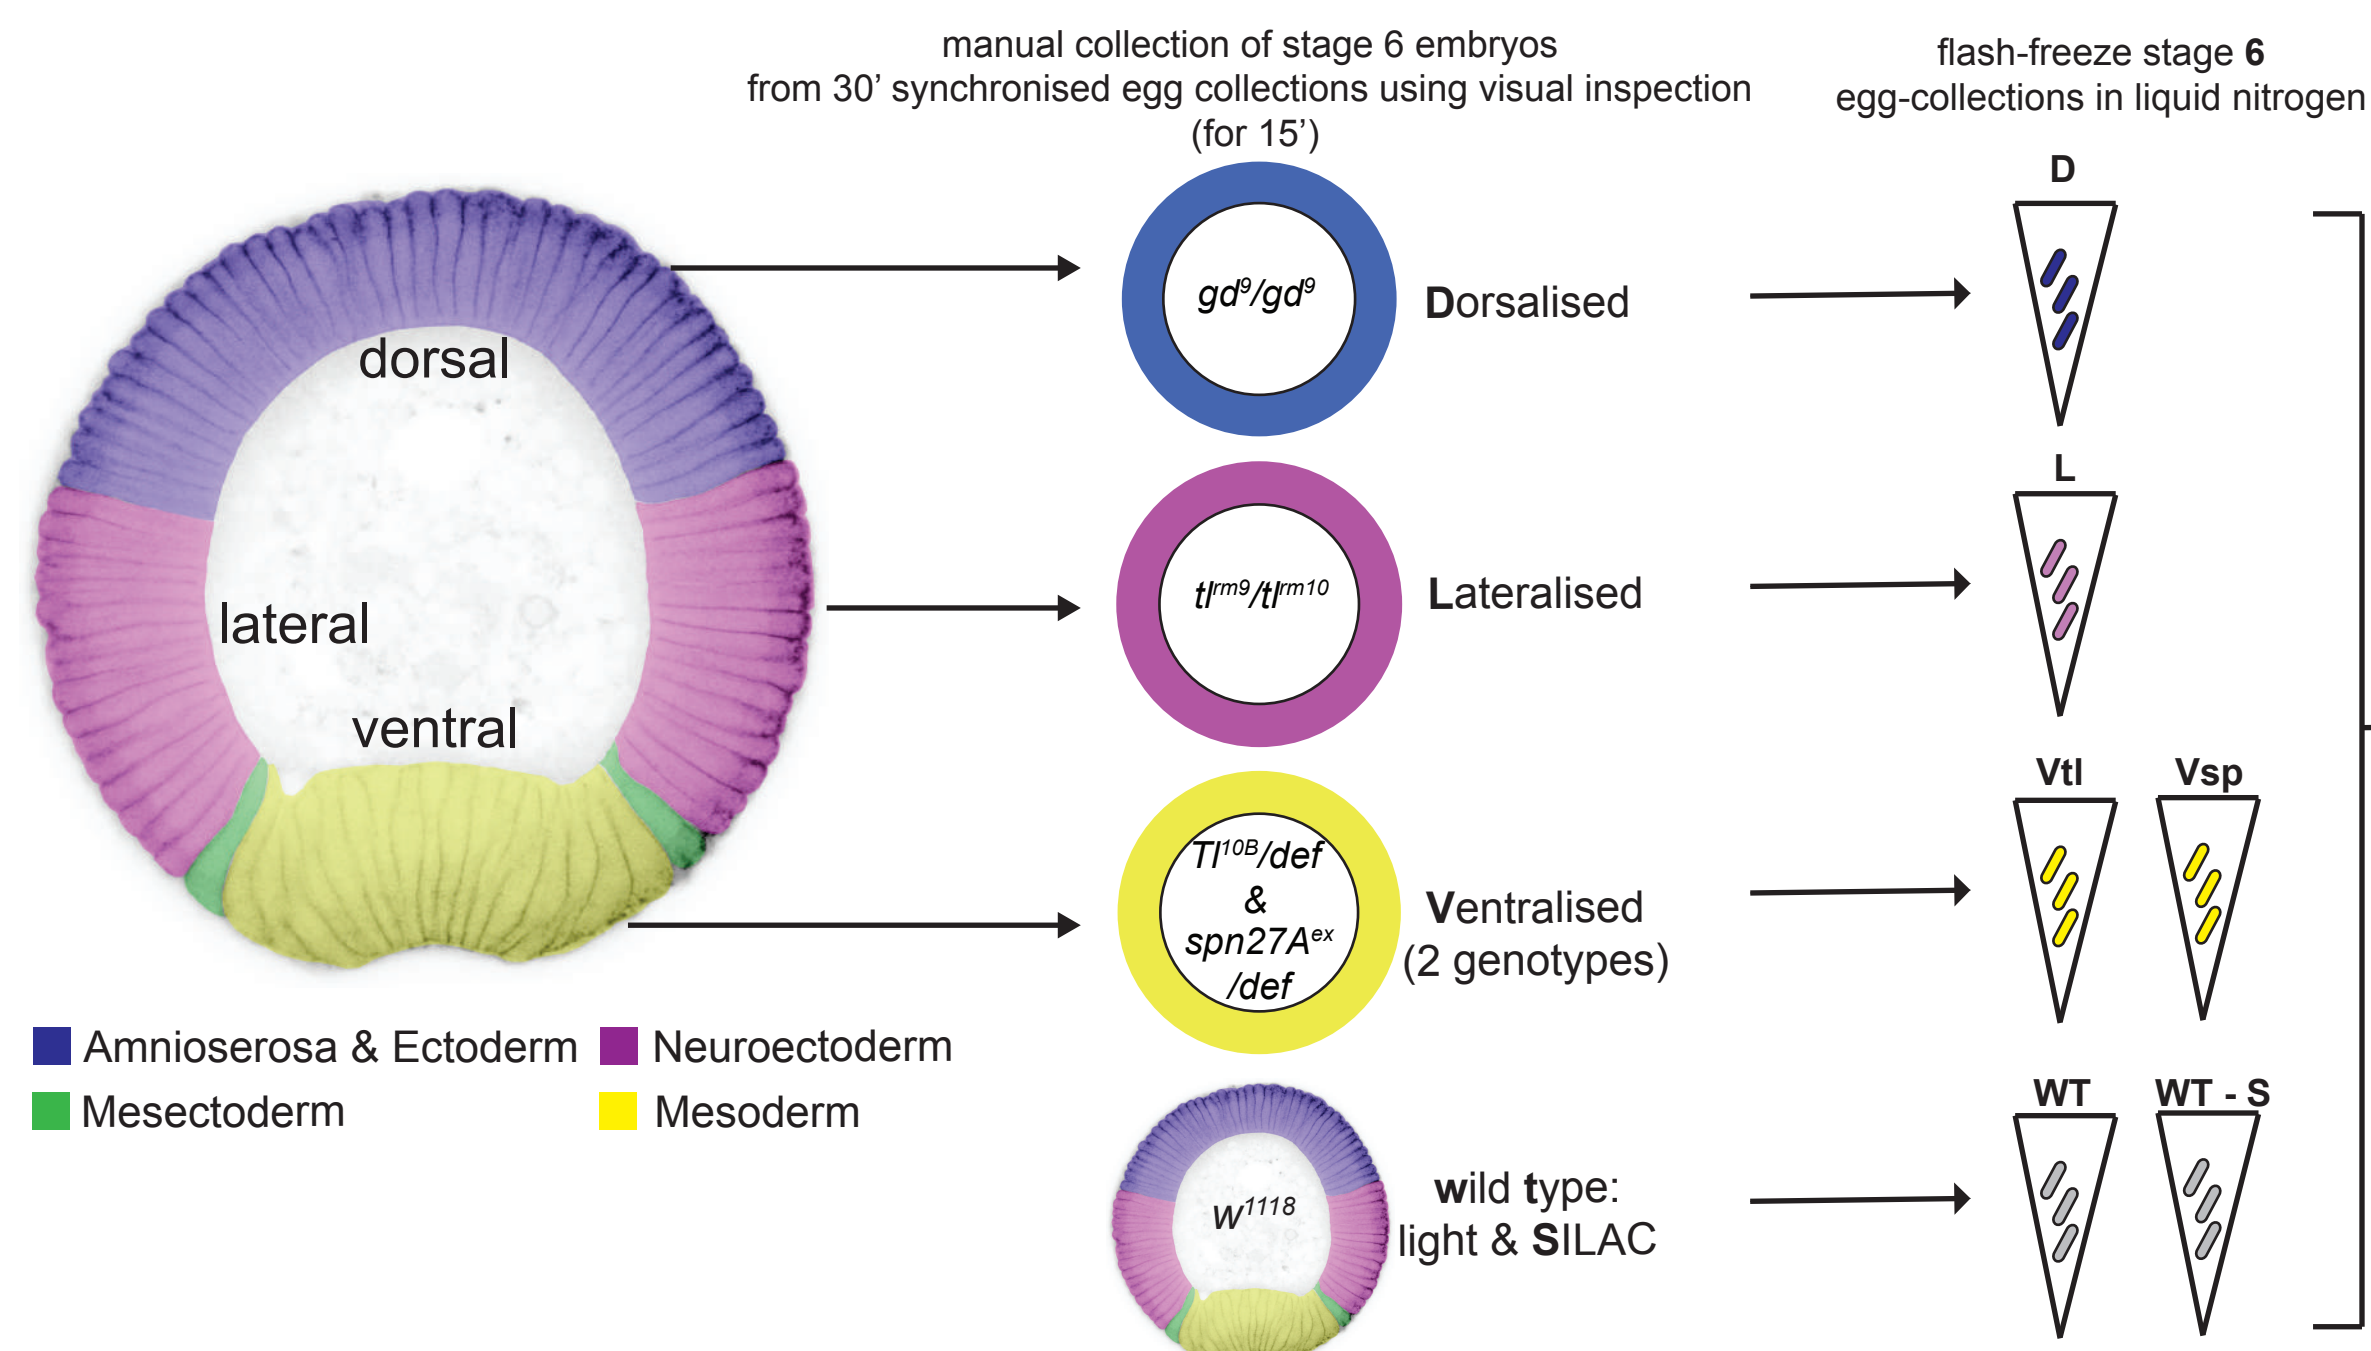

SILAC-  
phosphoproteomics  
(D)

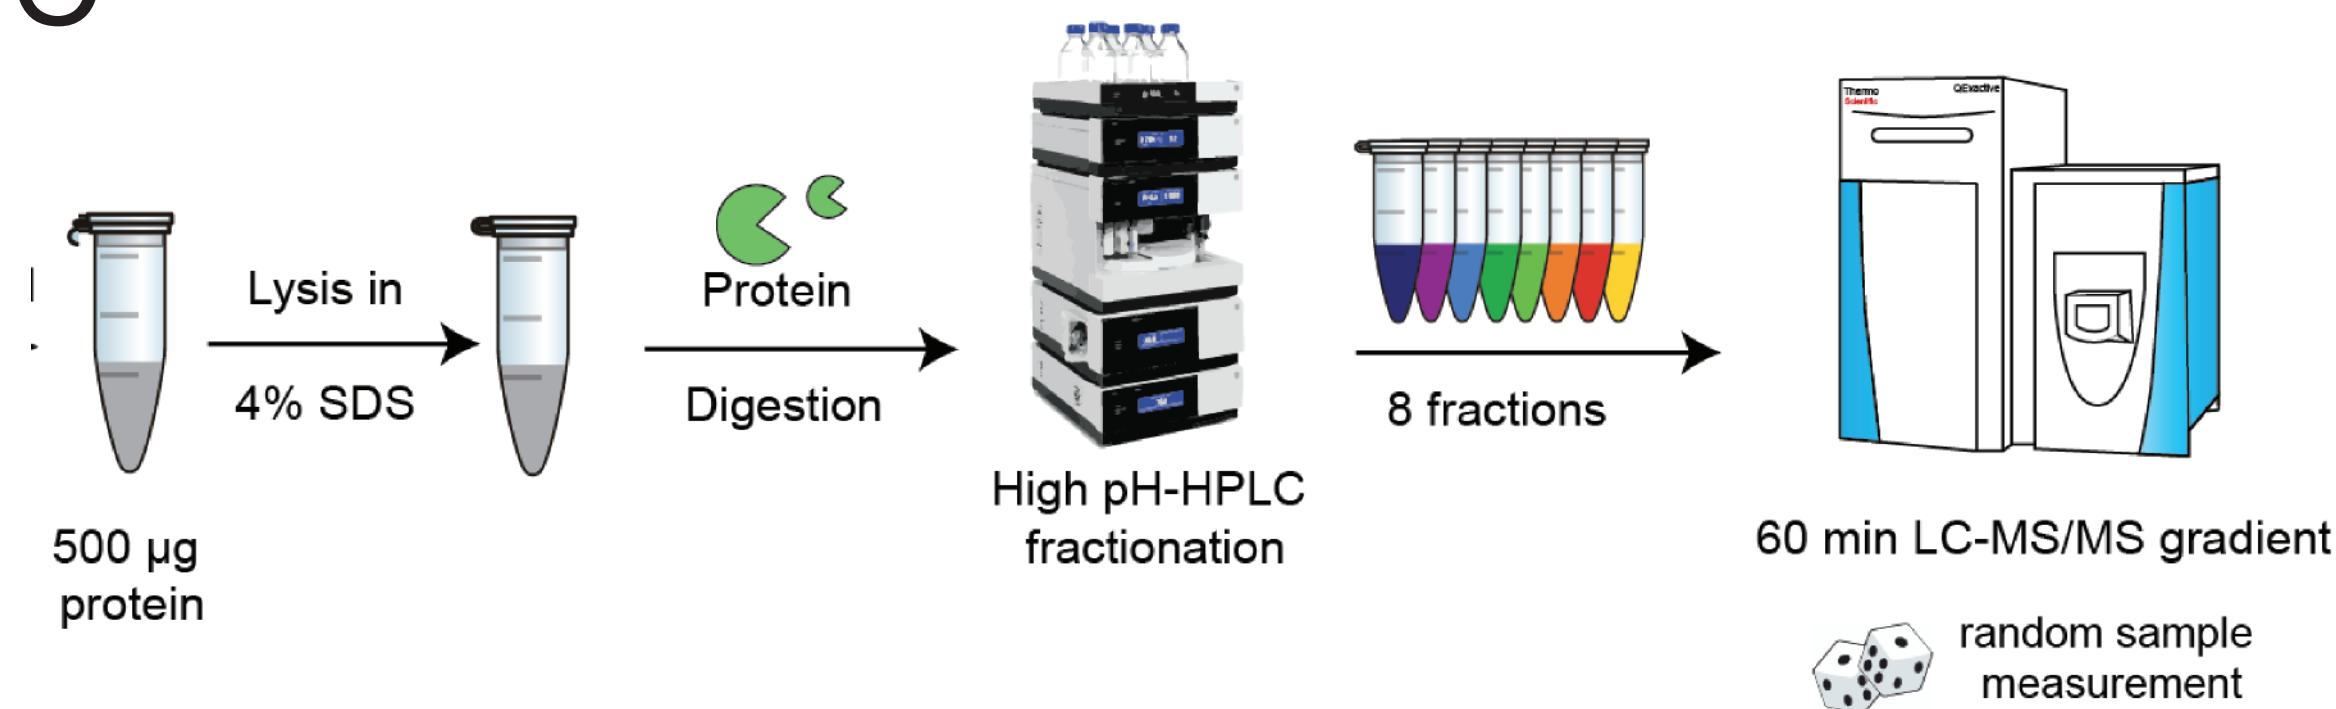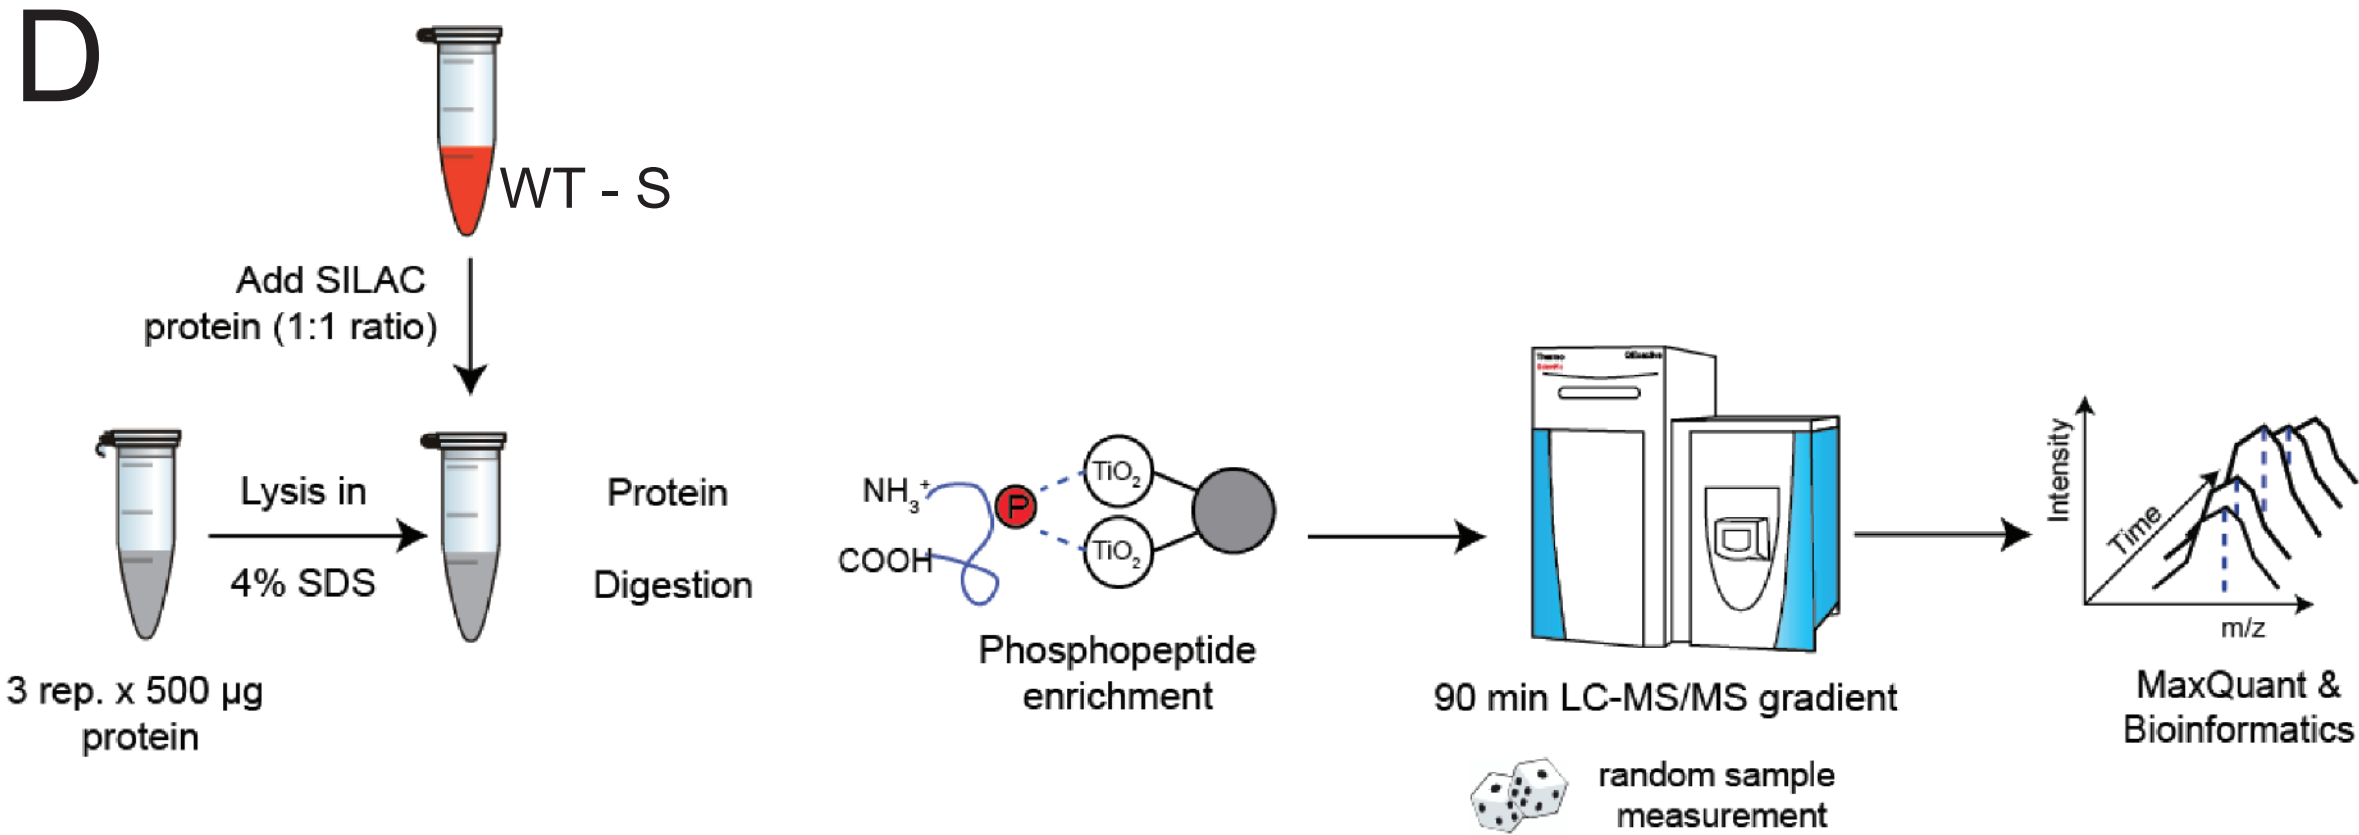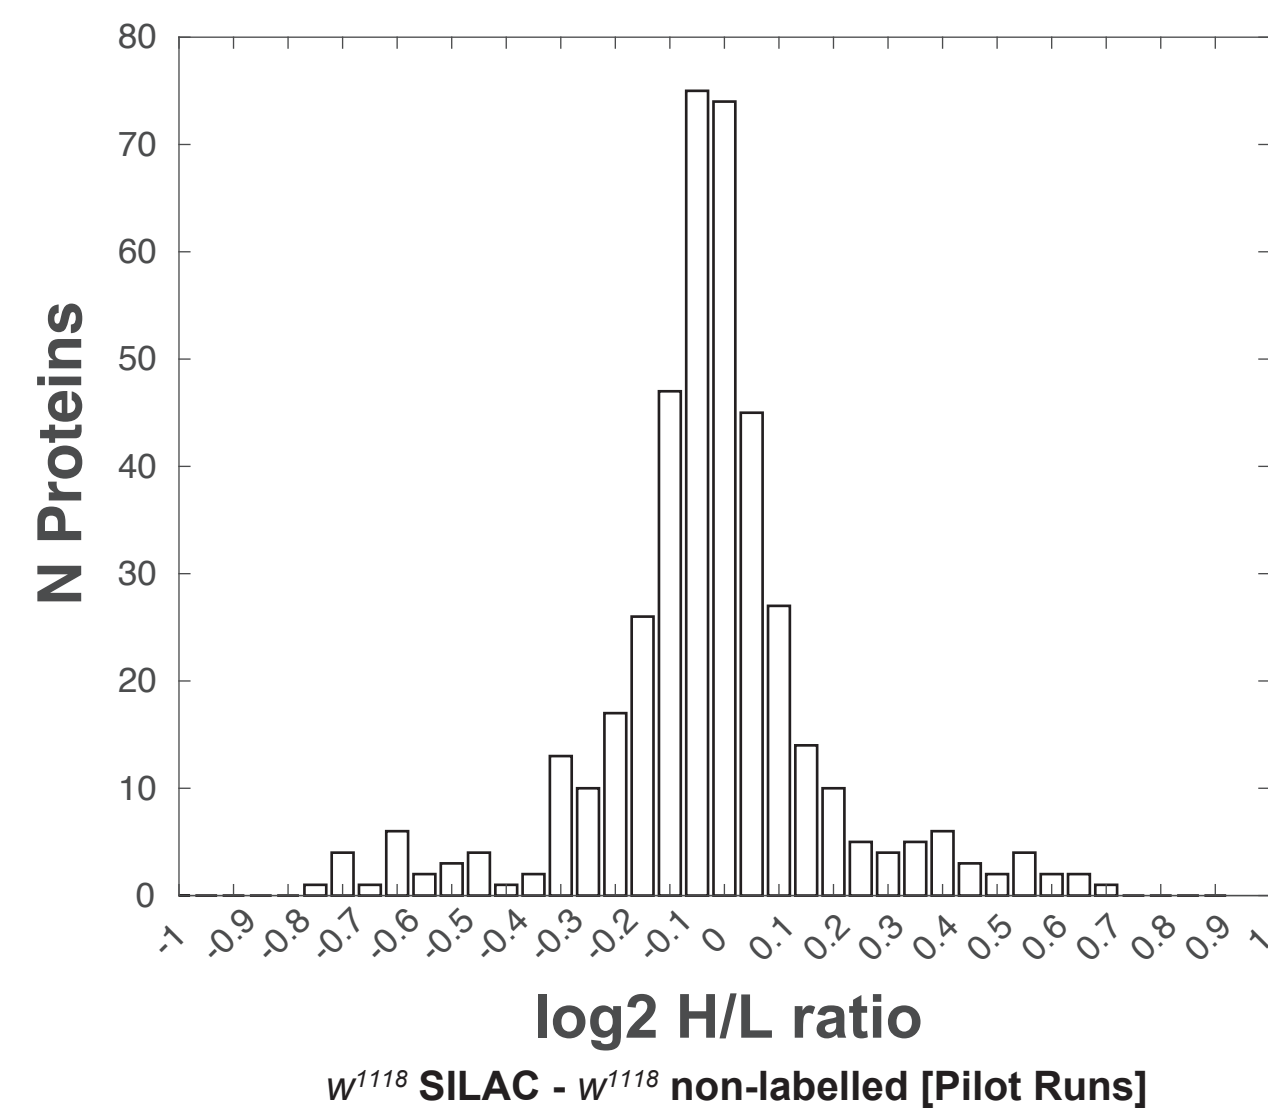

Supplement: supp [file elife_poa_e99263_Figure_1_figure_supplement_1.pdf › elife_poa_e99263_Figure_1_figure_supplement_1.pdf]

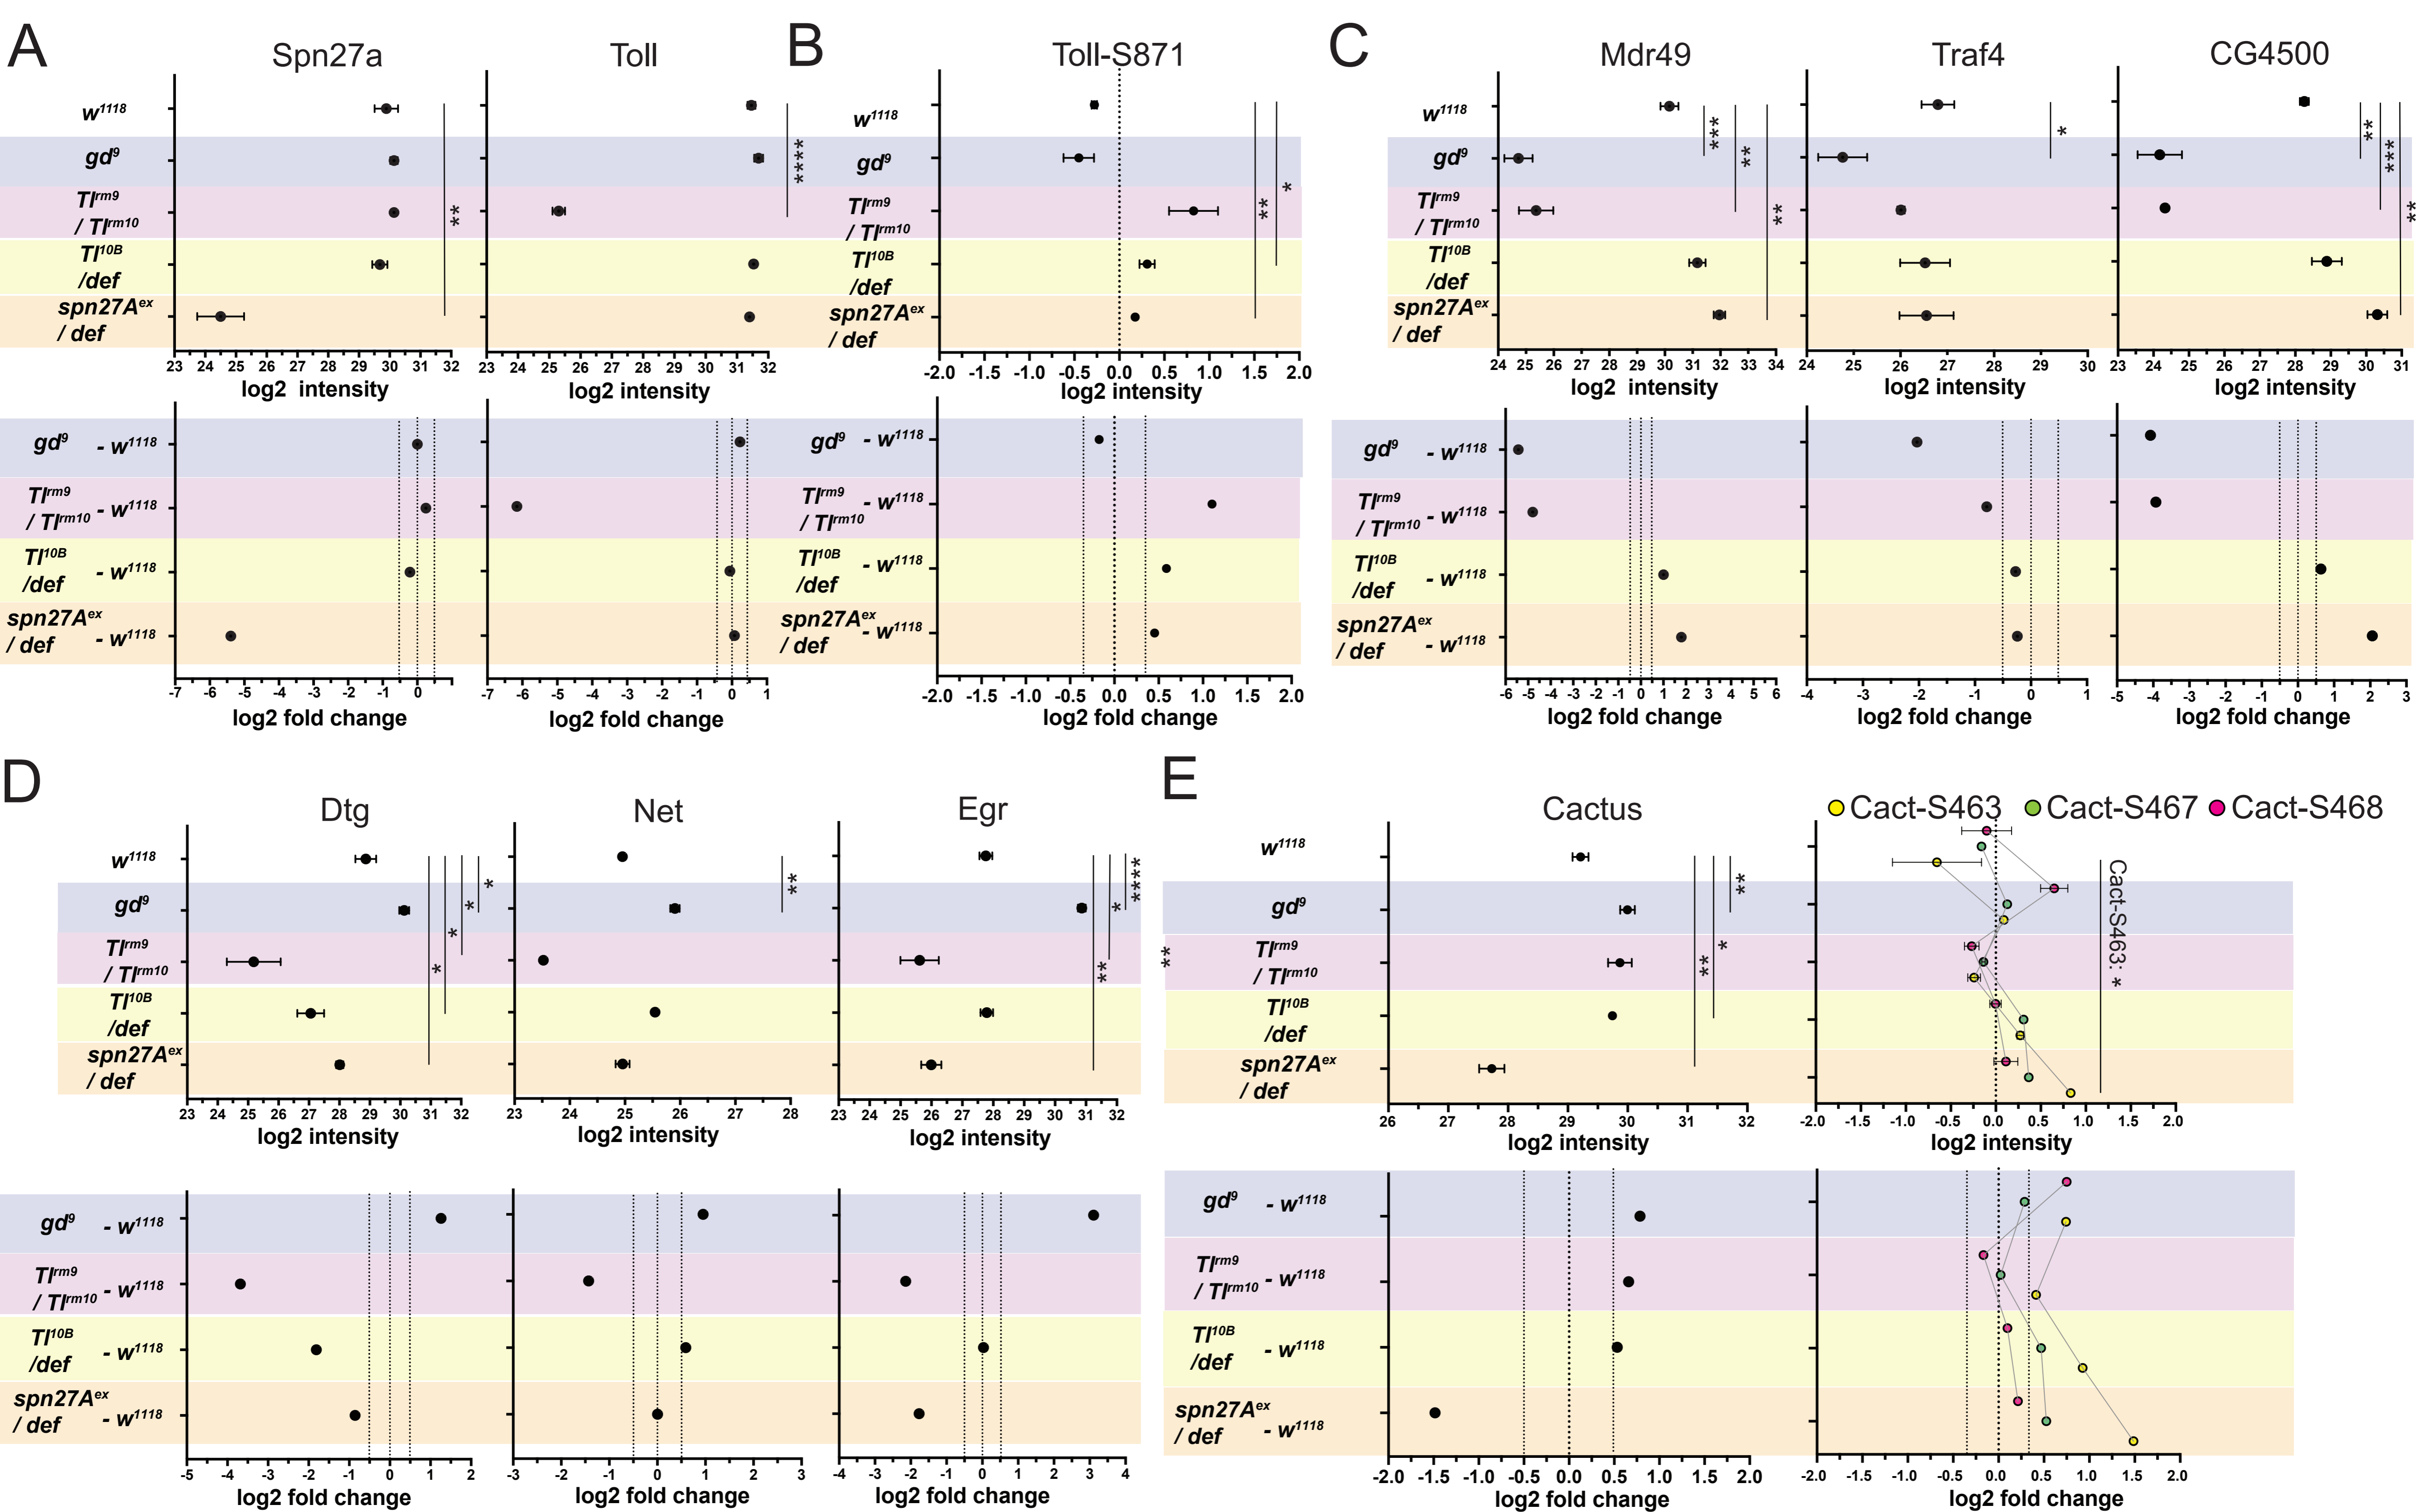

Supplement: supp [file elife_poa_e99263_Figure_2_figure_supplement_1.pdf › elife_poa_e99263_Figure_2_figure_supplement_1.pdf]

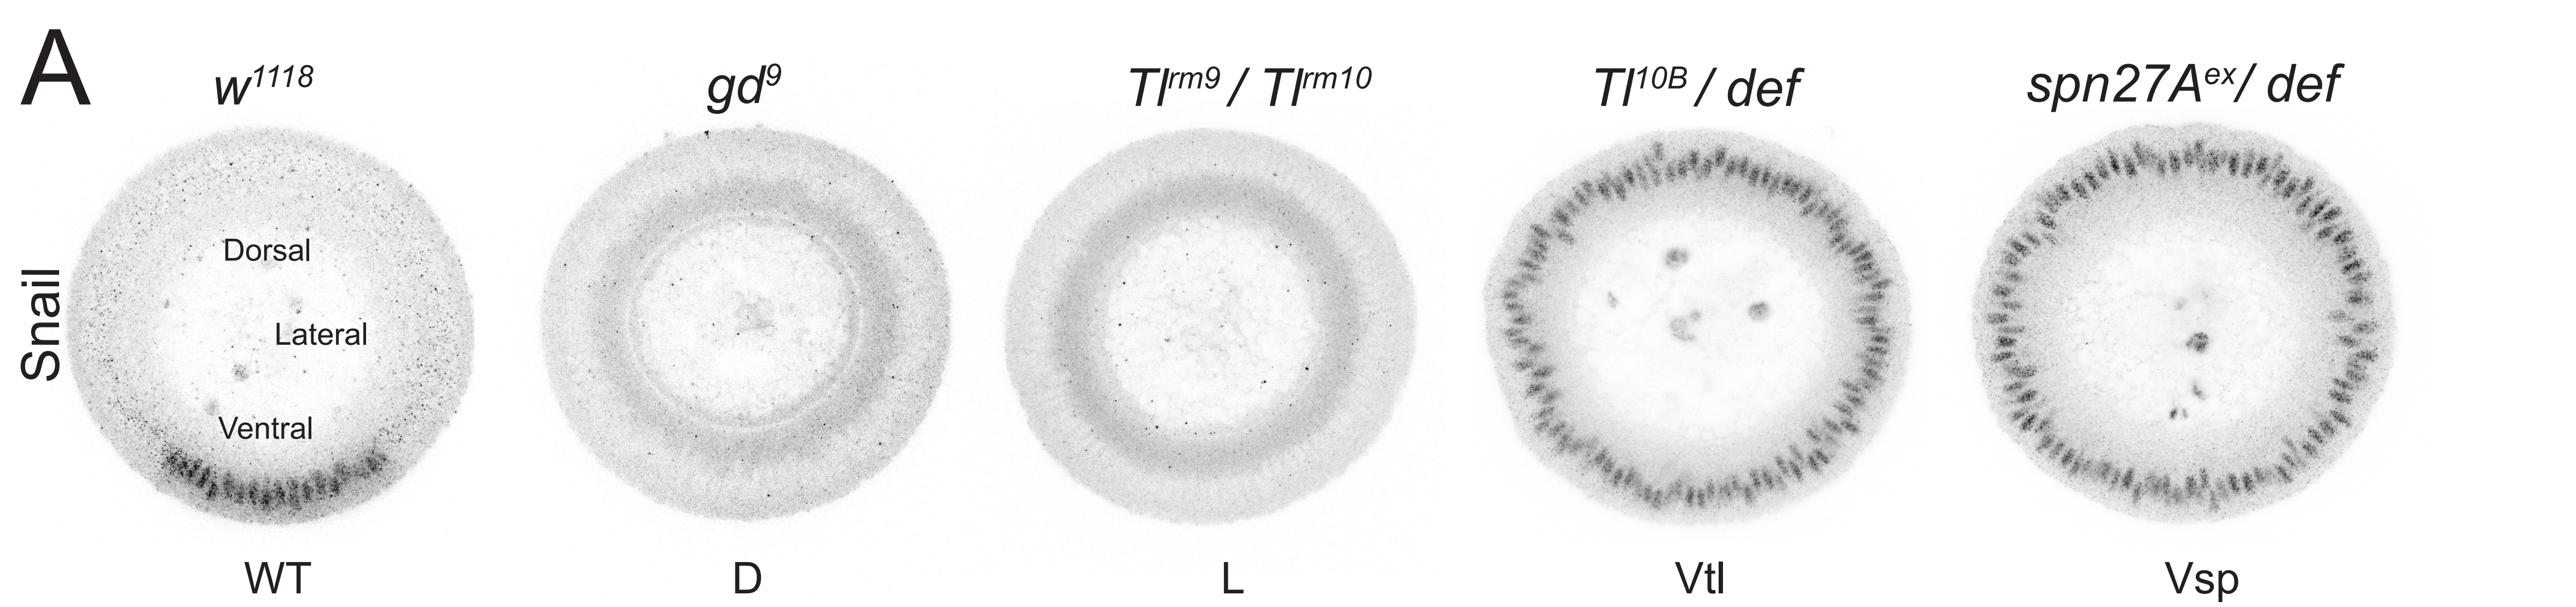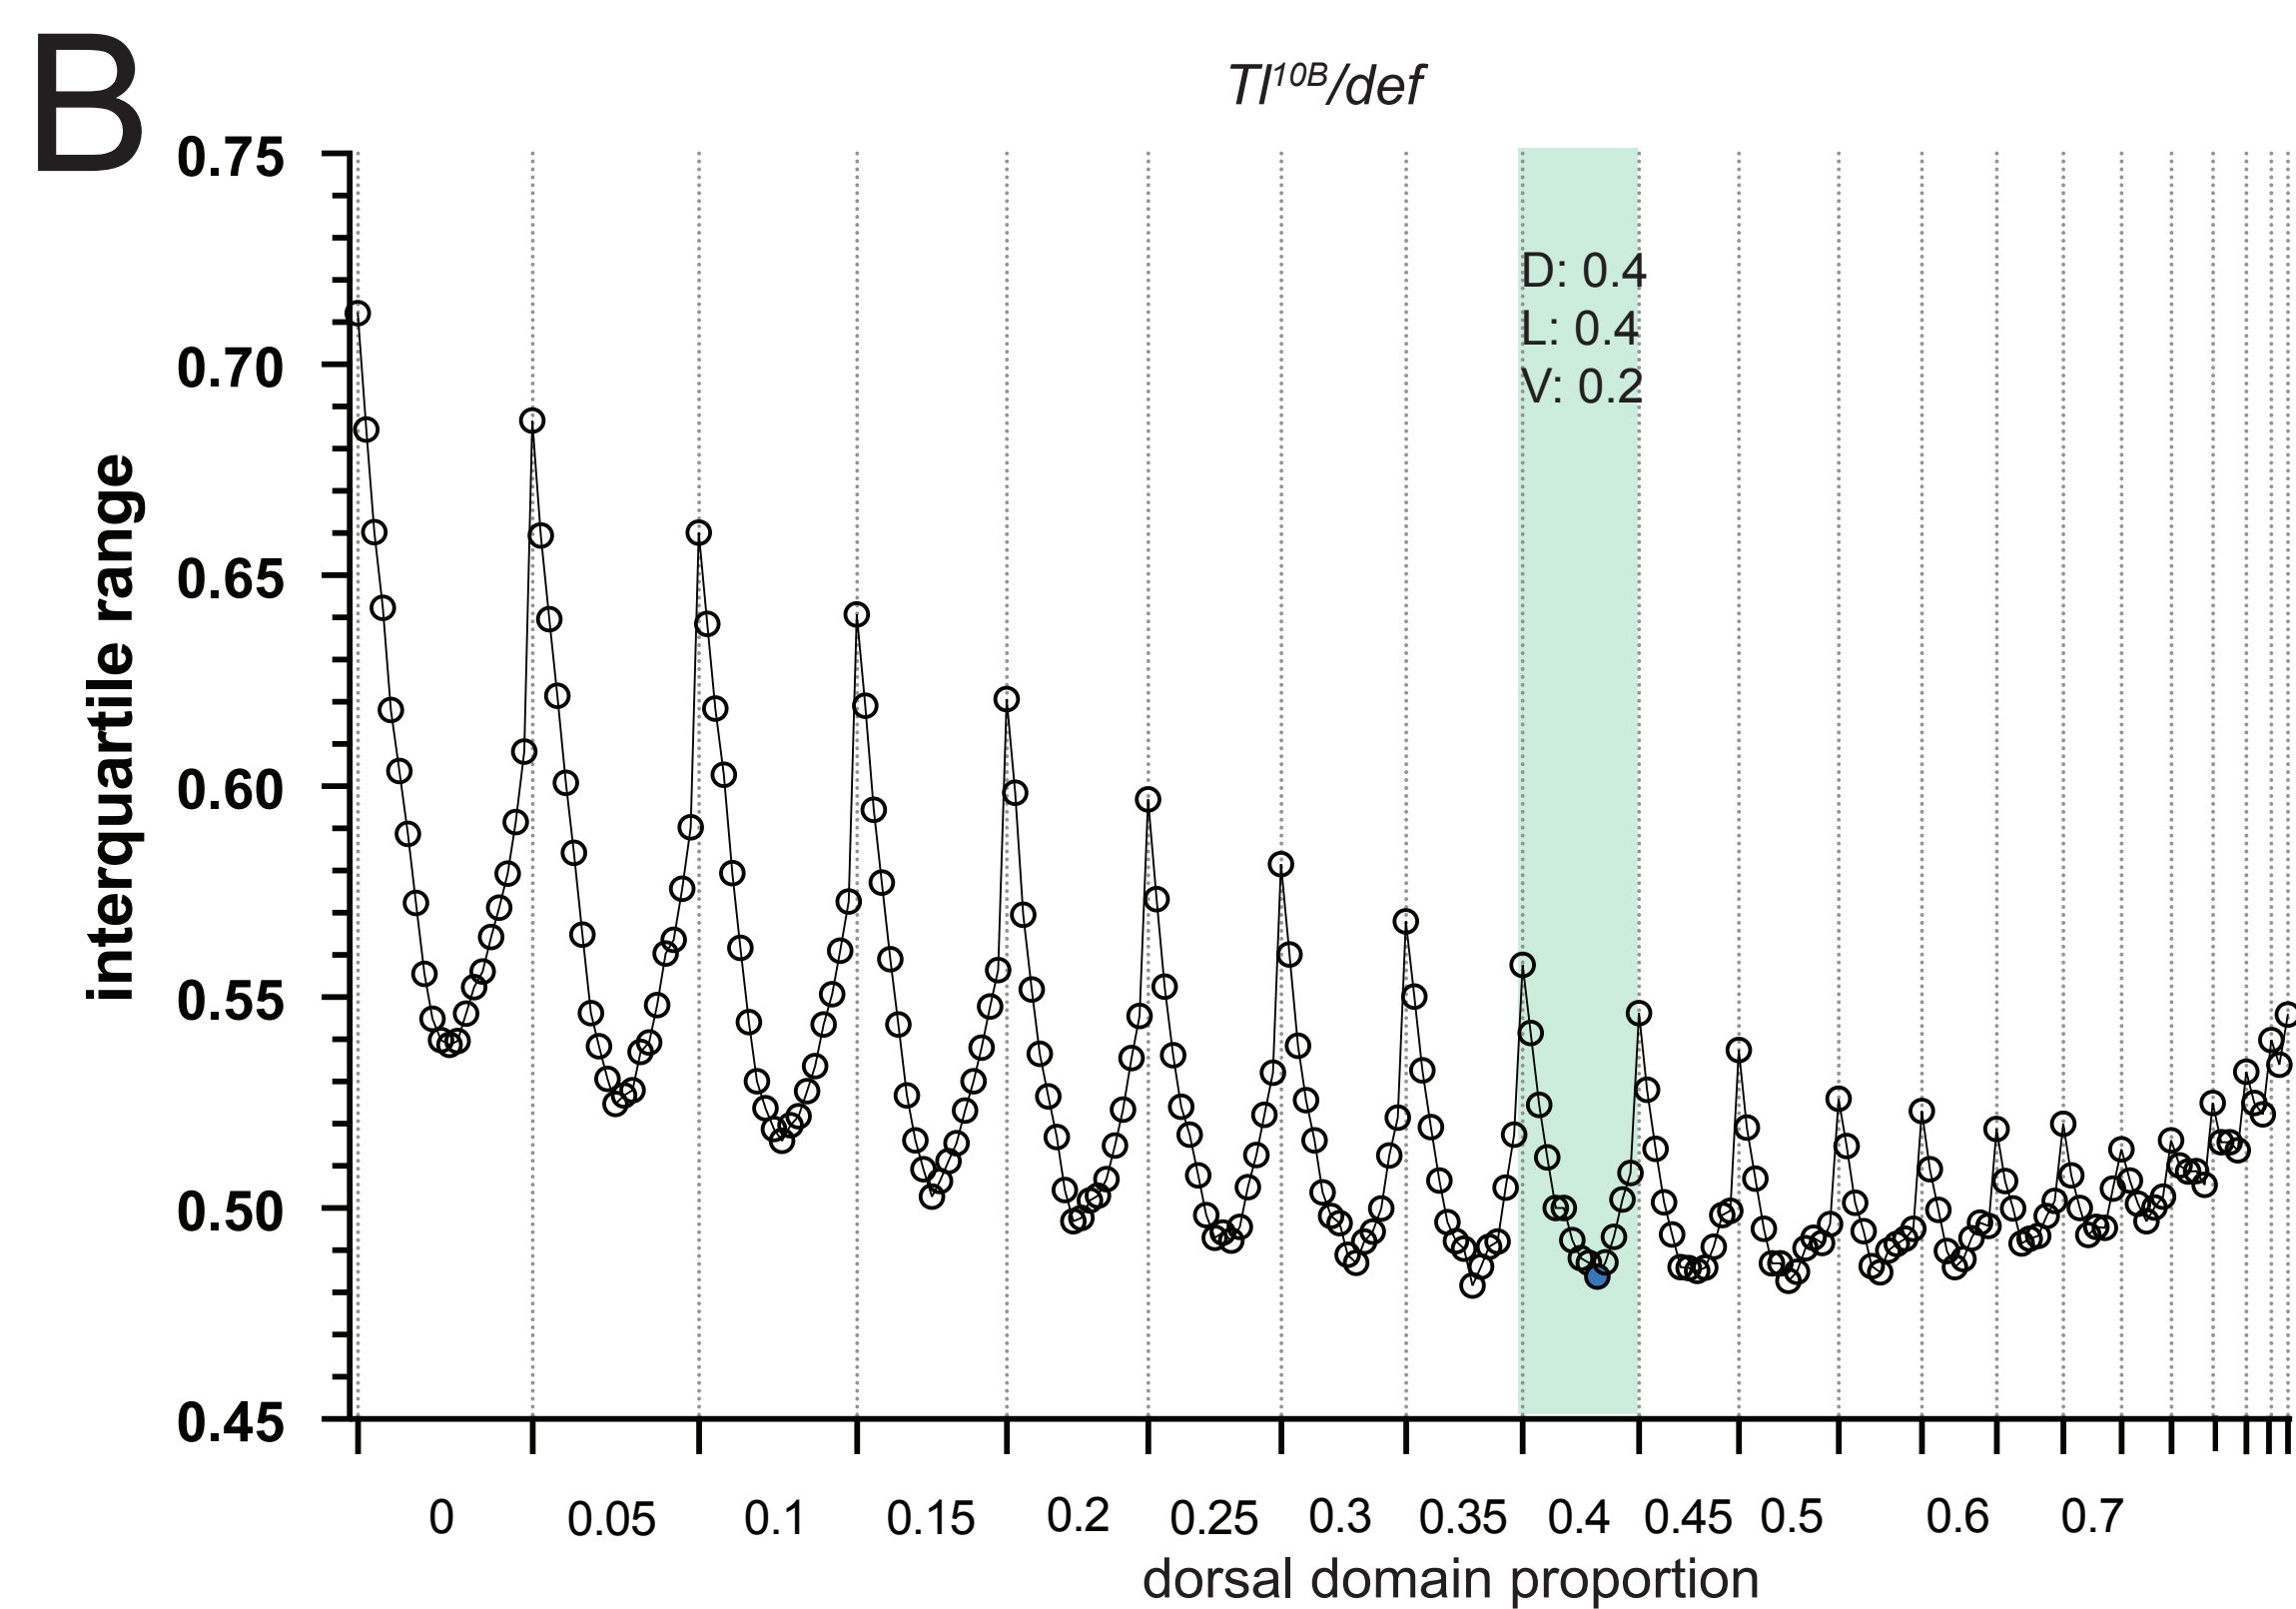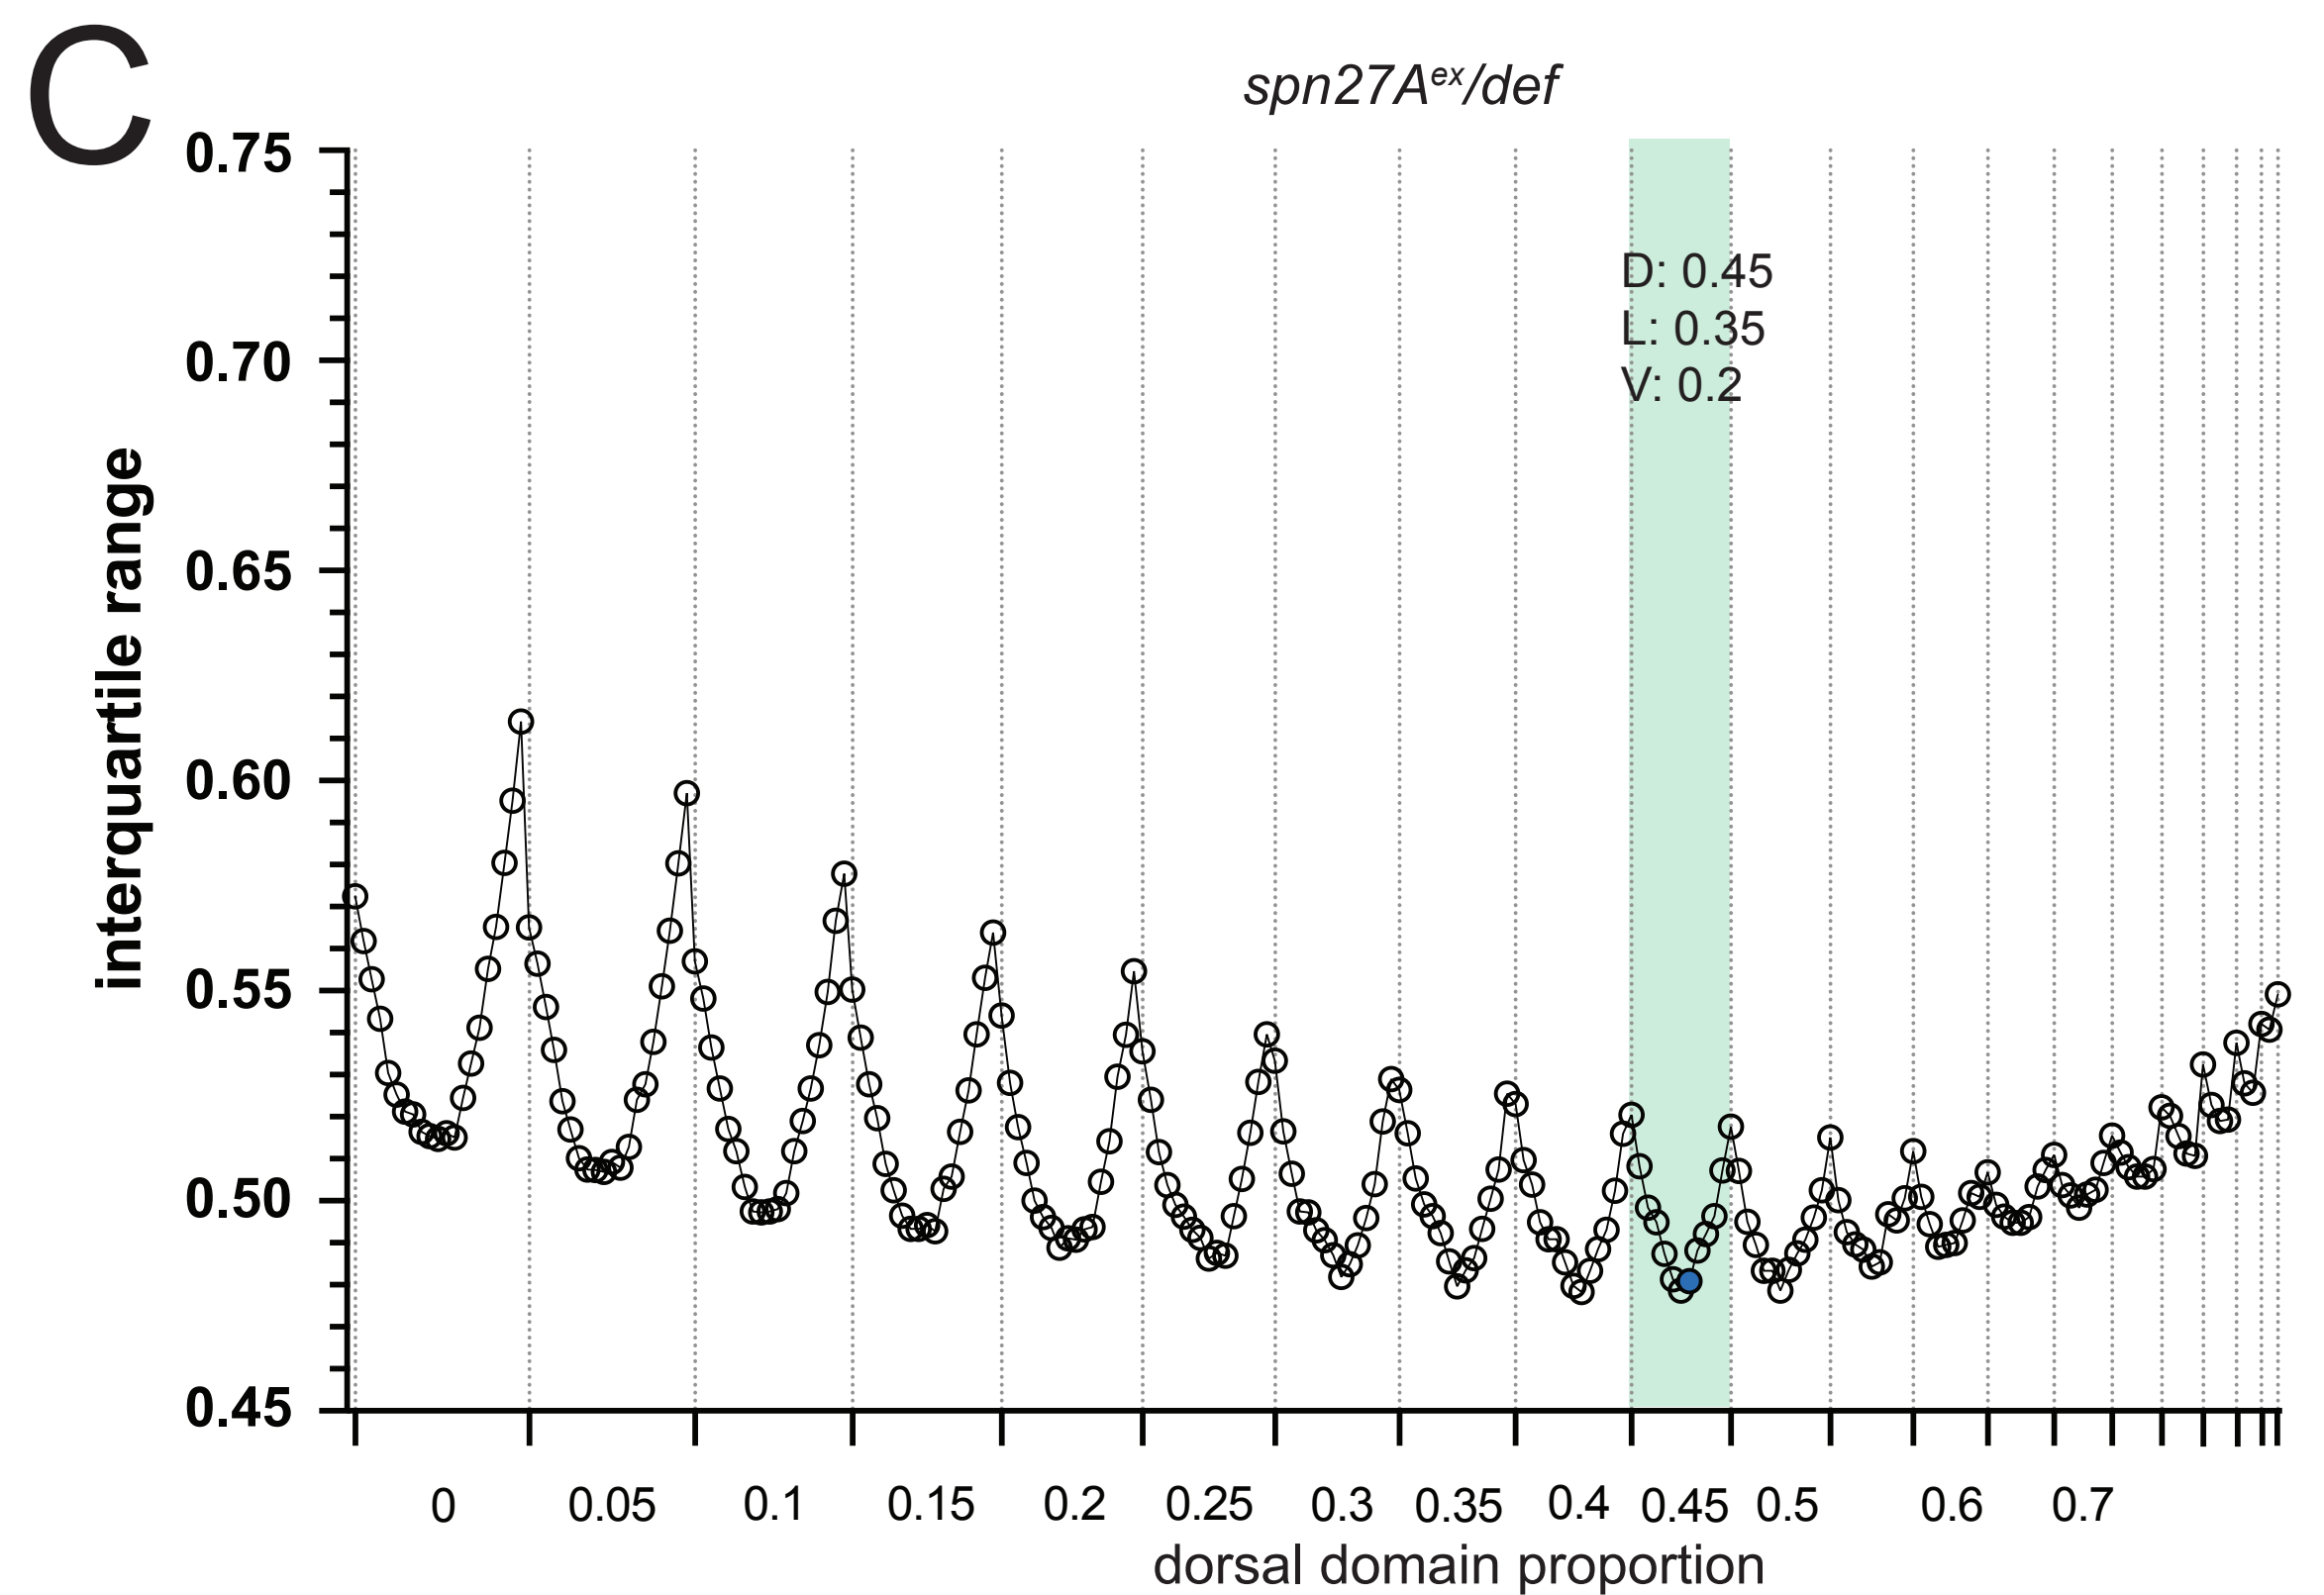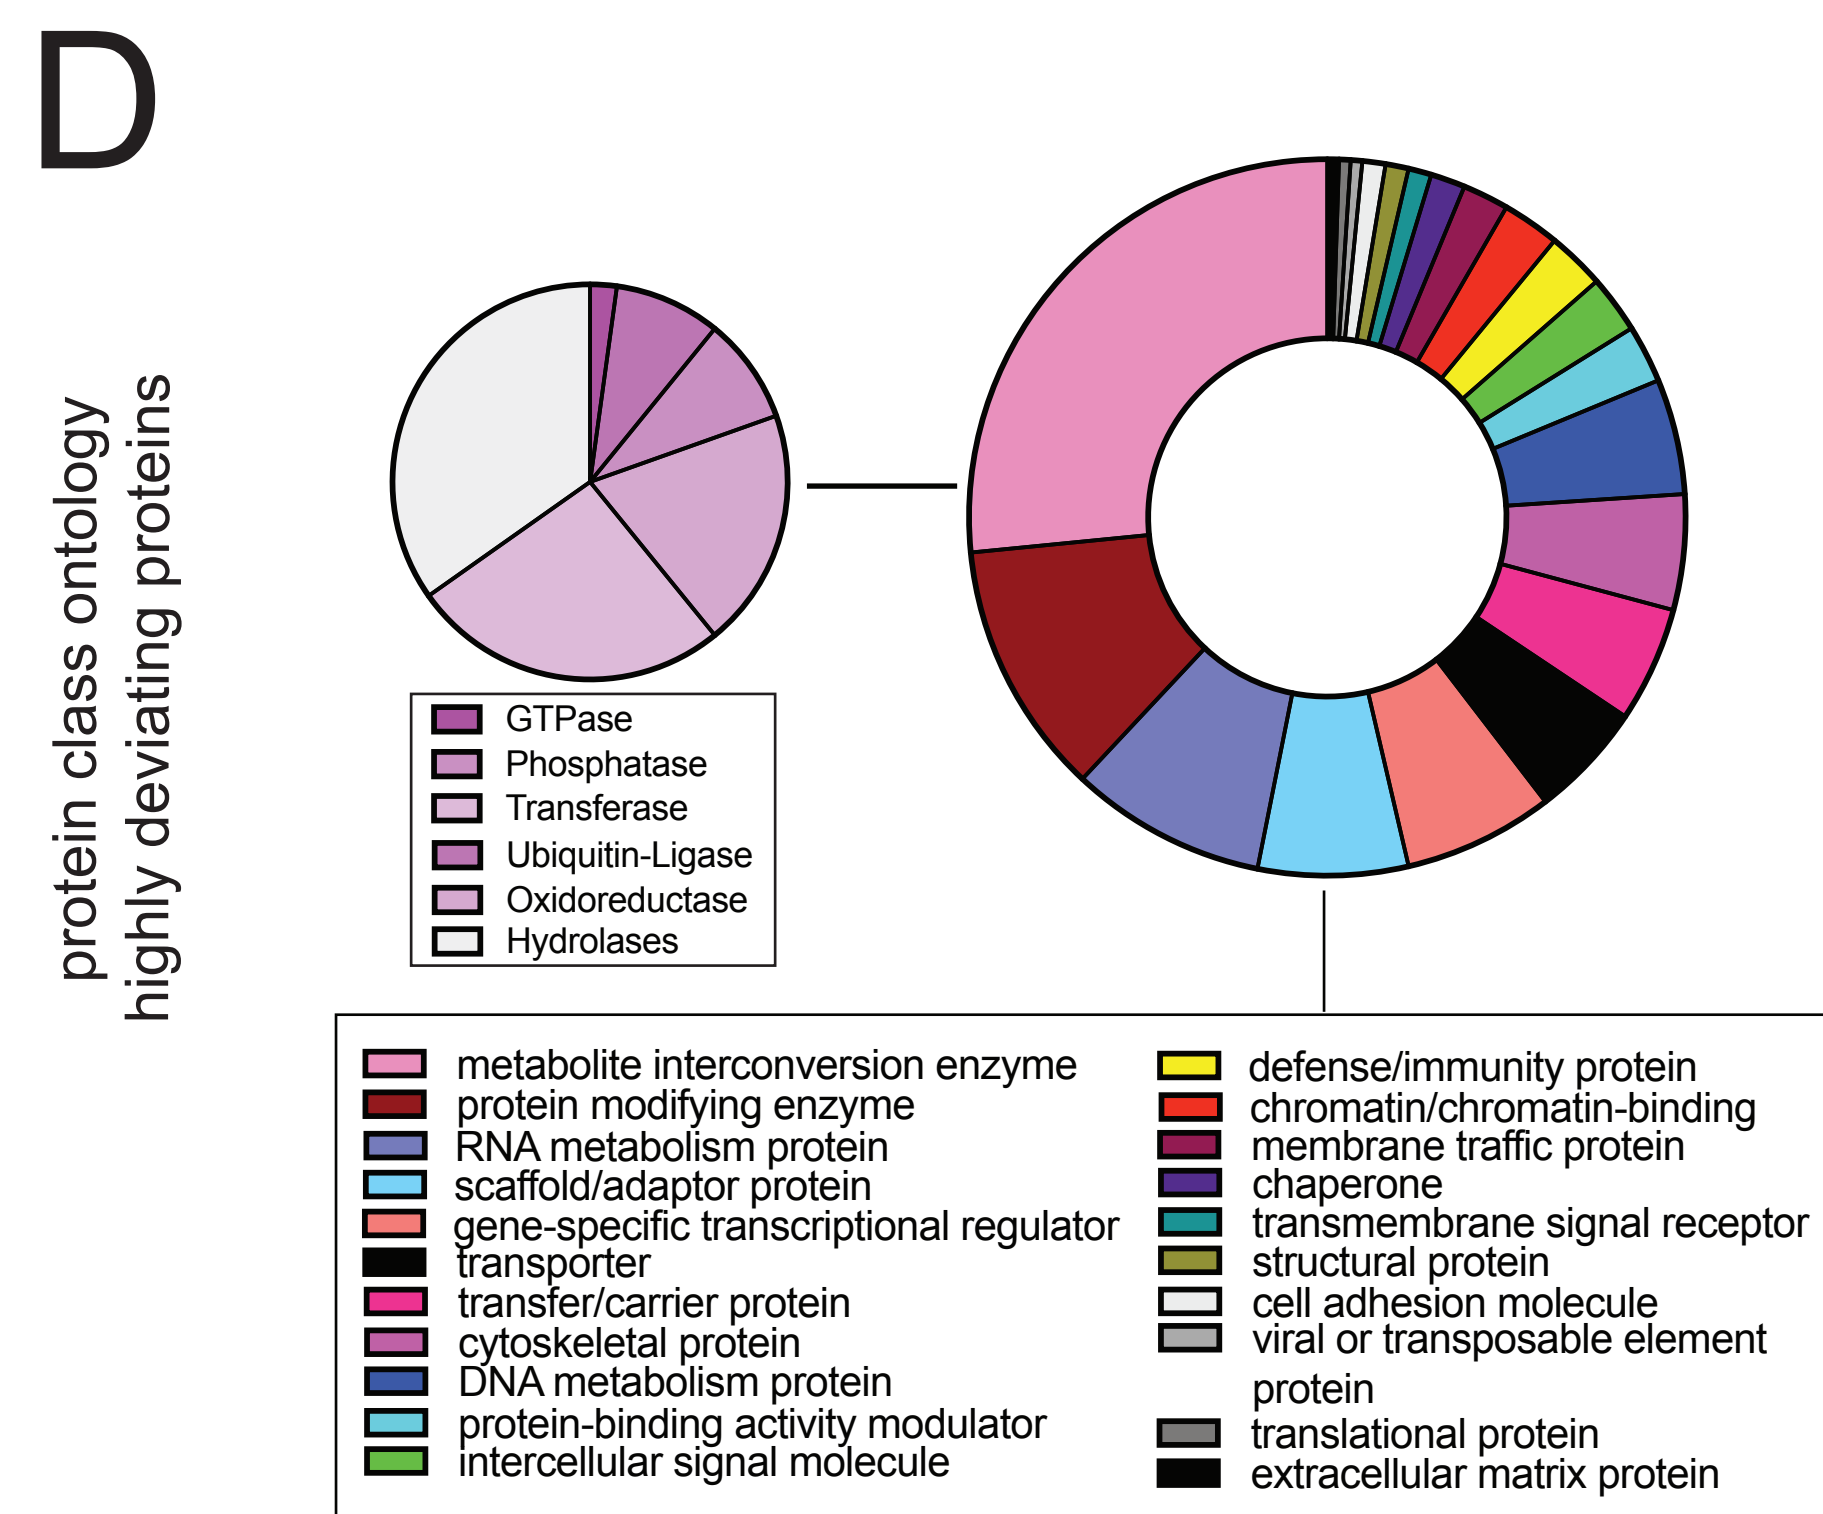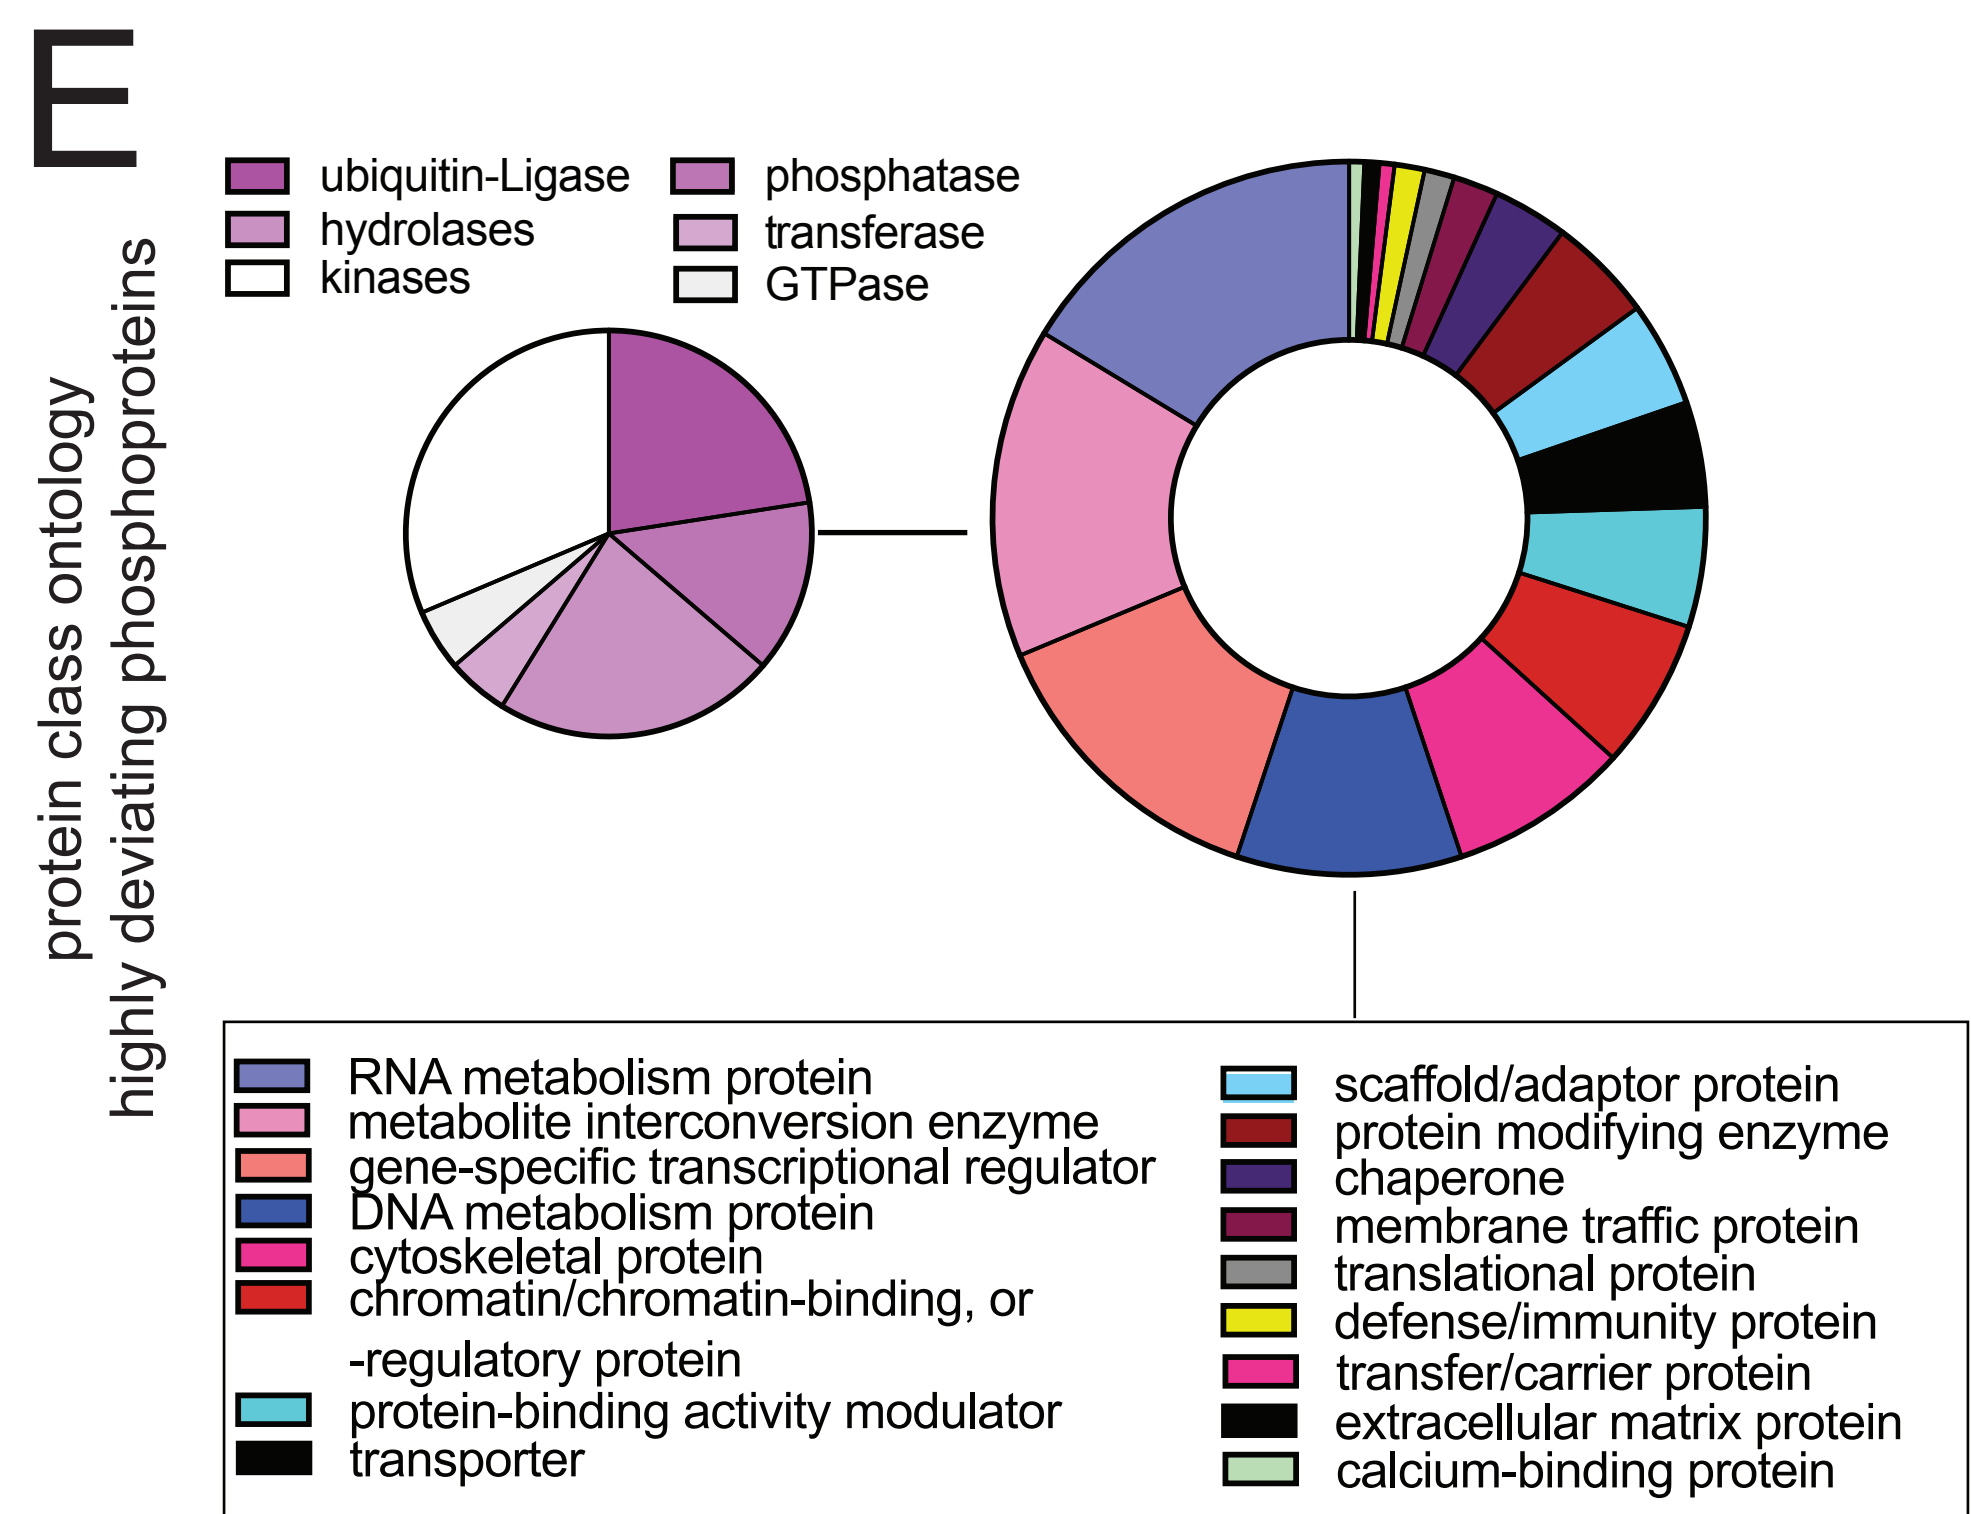

Supplement: supp [file elife_poa_e99263_Figure_3_figure_supplement_1.pdf › elife_poa_e99263_Figure_3_figure_supplement_1.pdf]

A

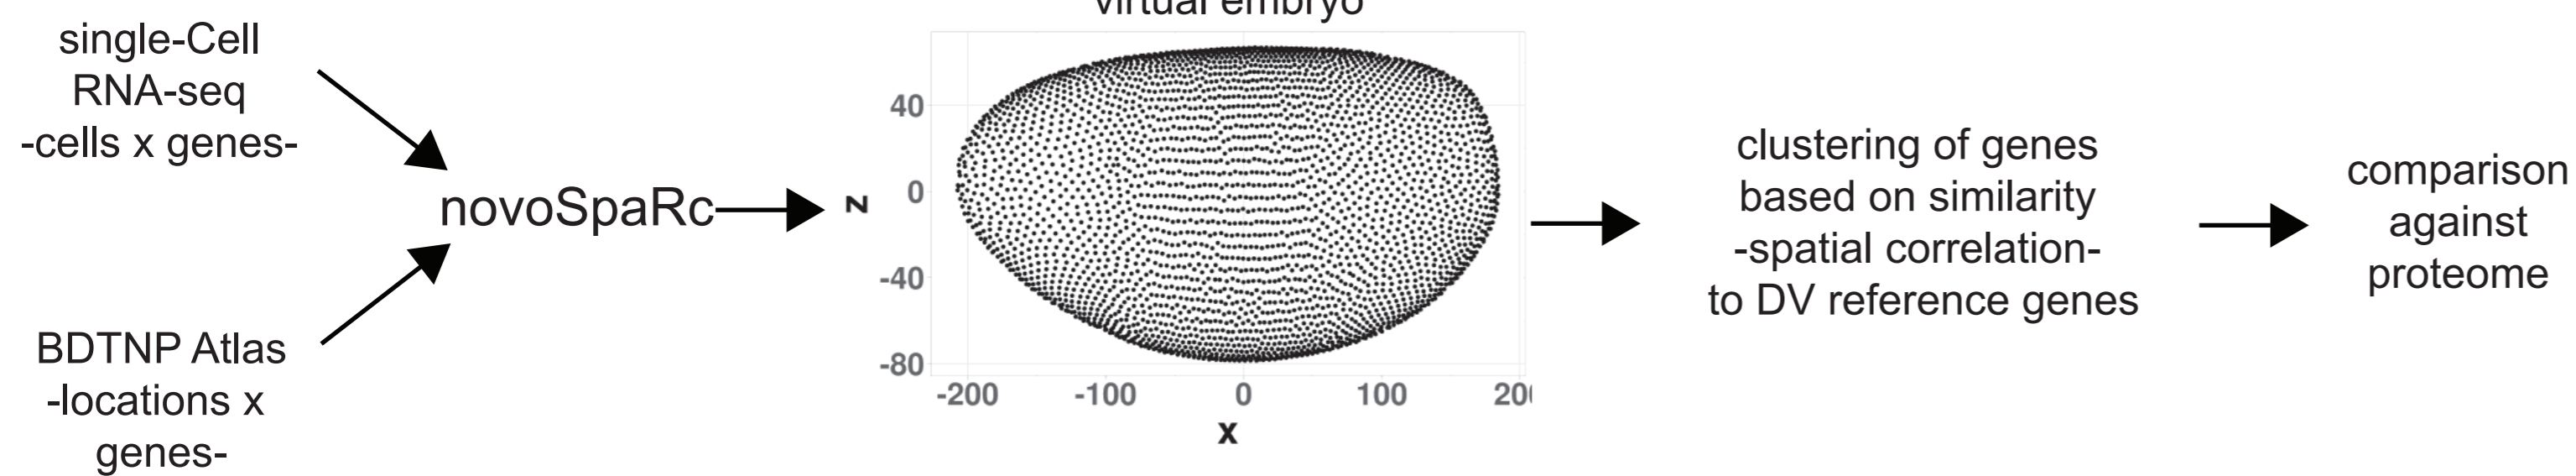

C

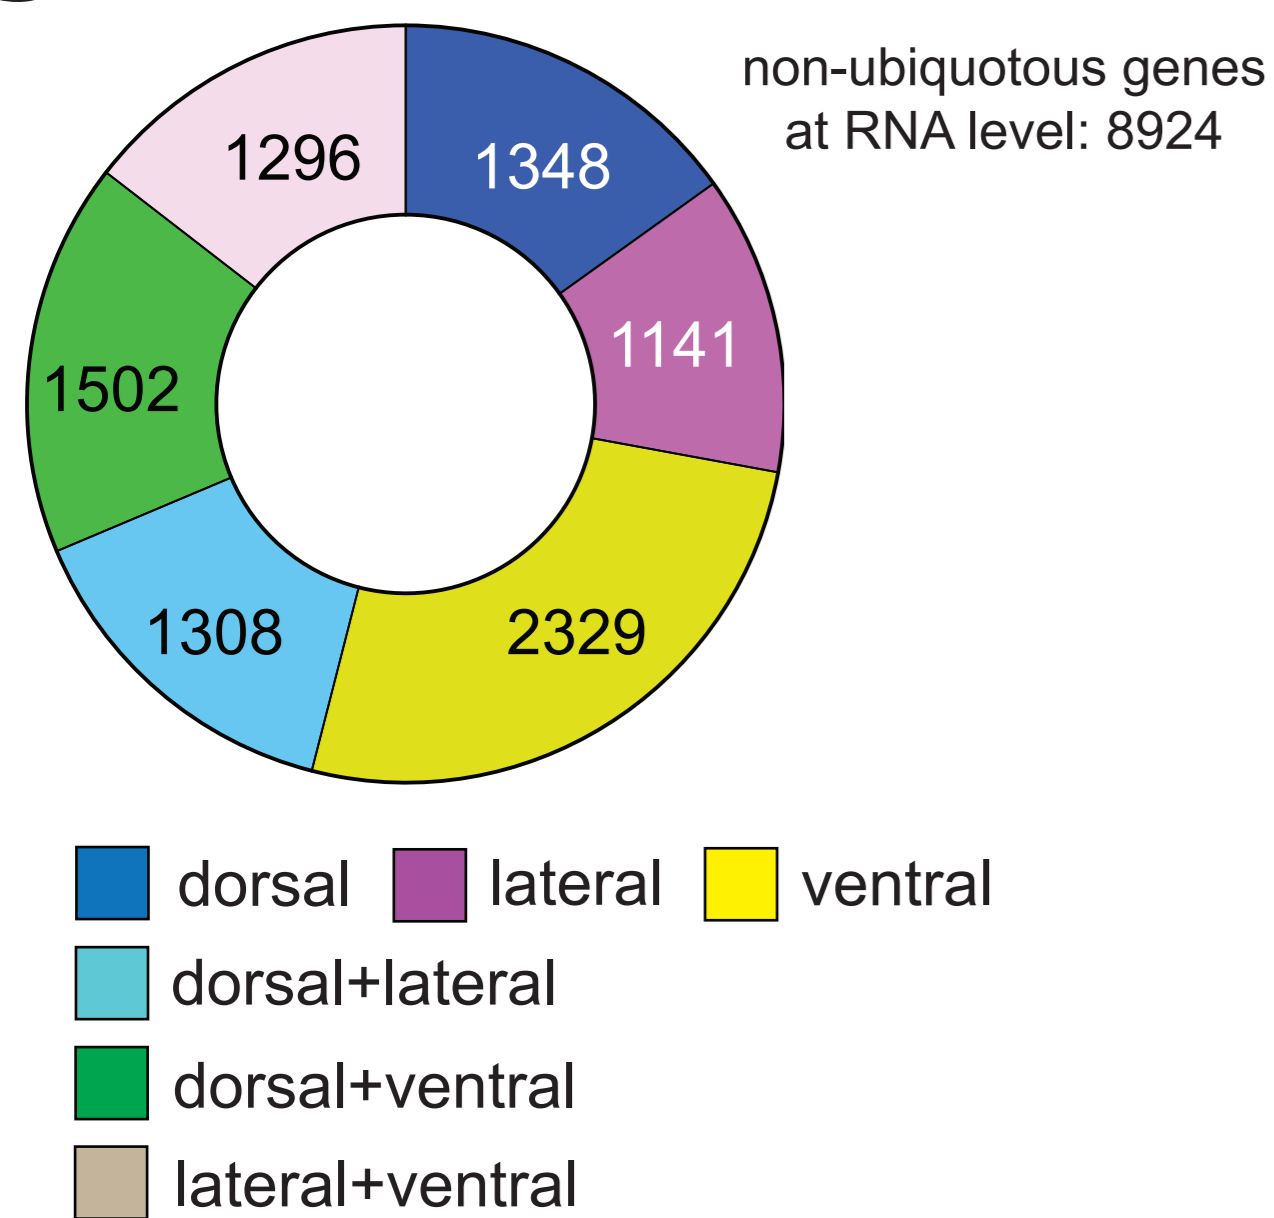

D

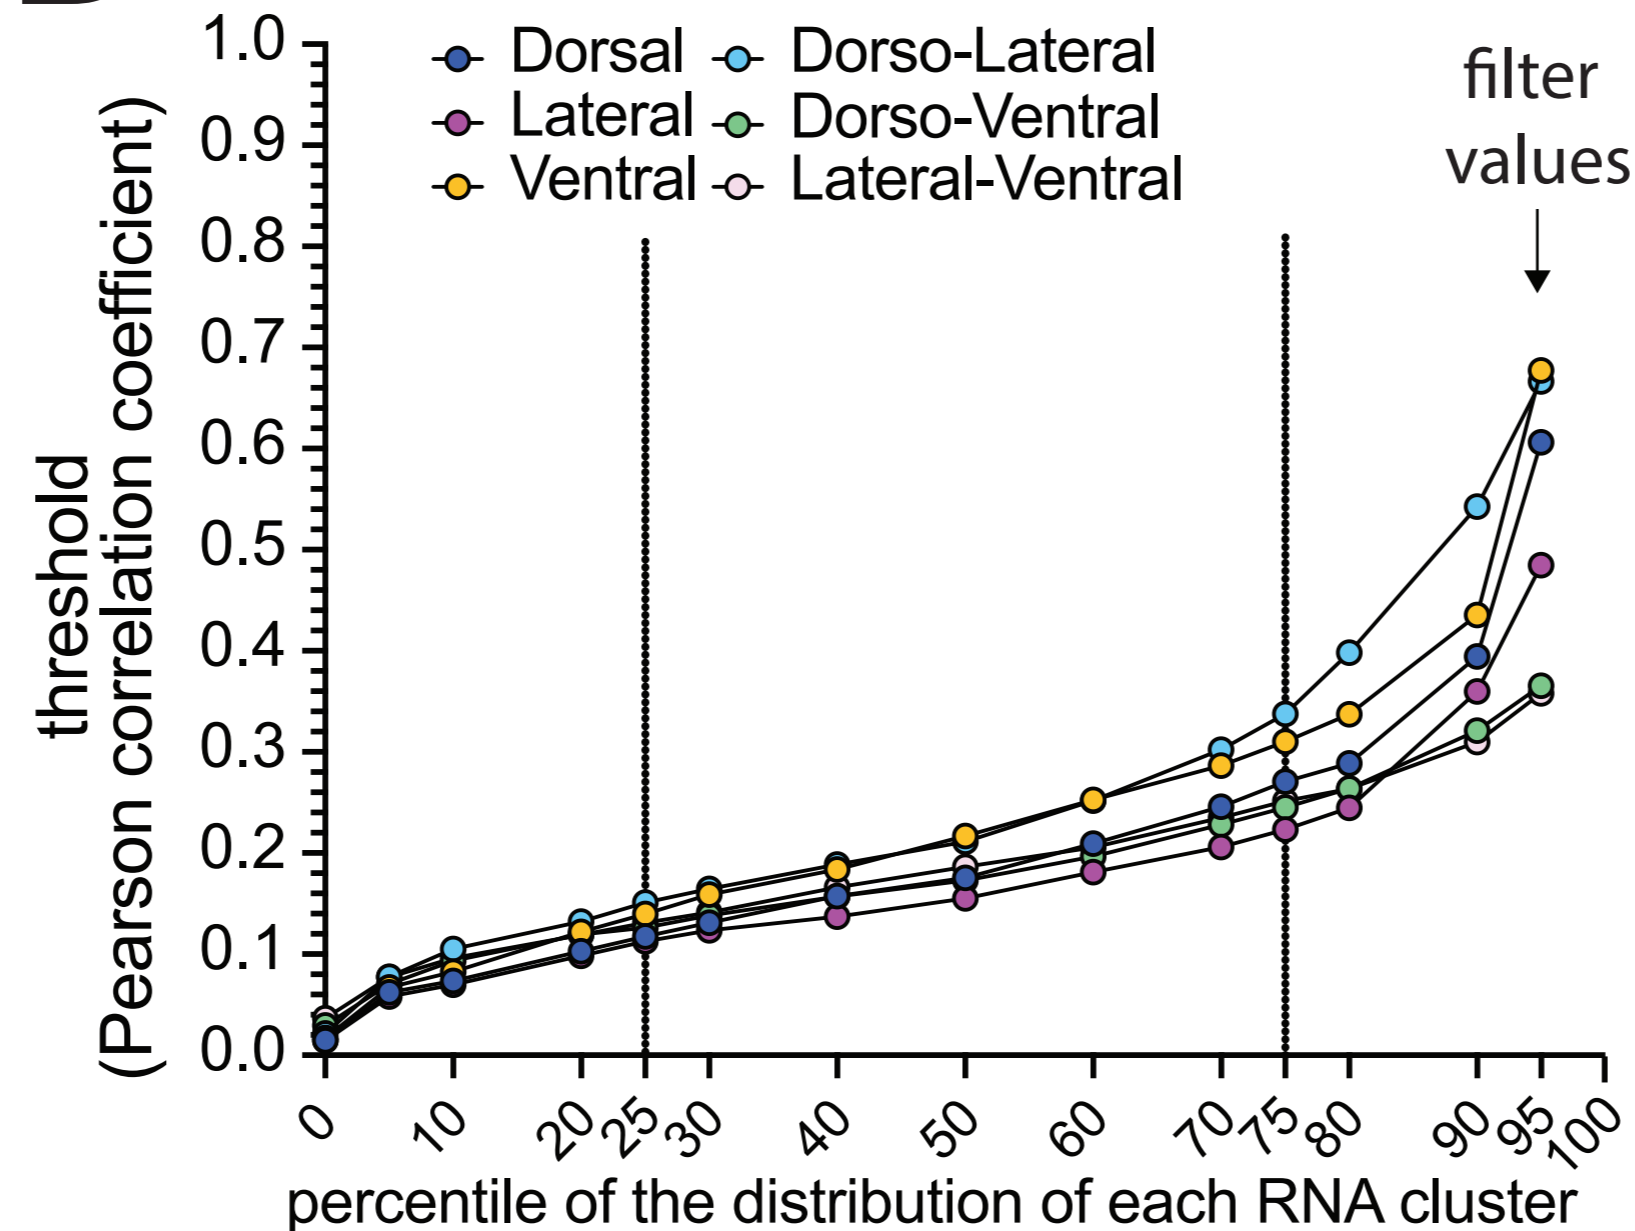

B

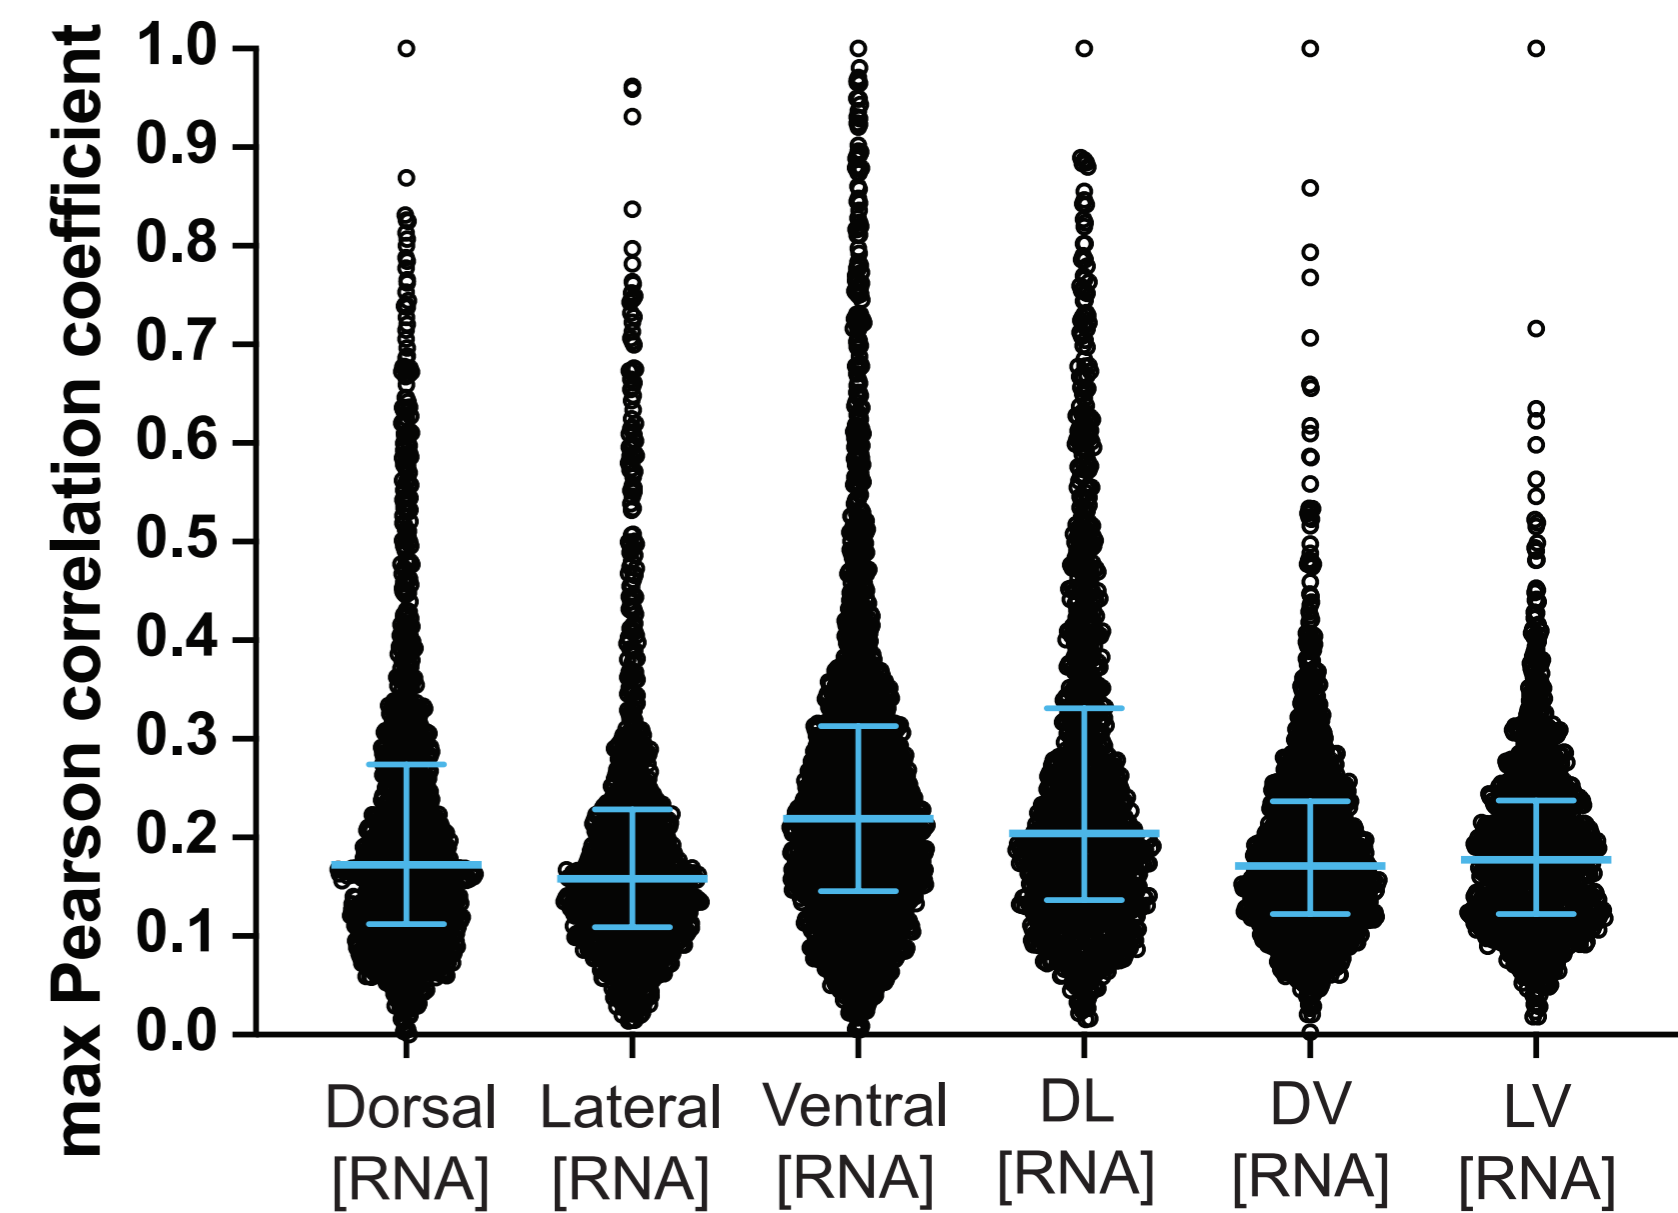

F

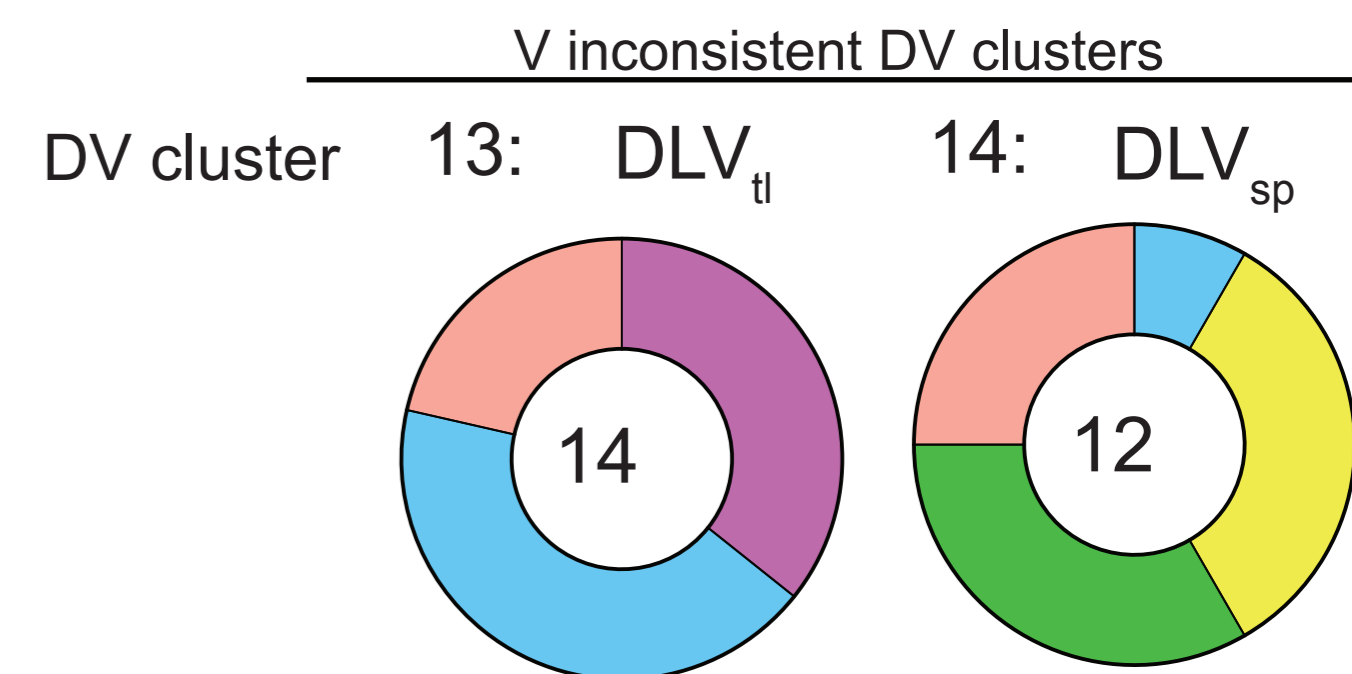

E

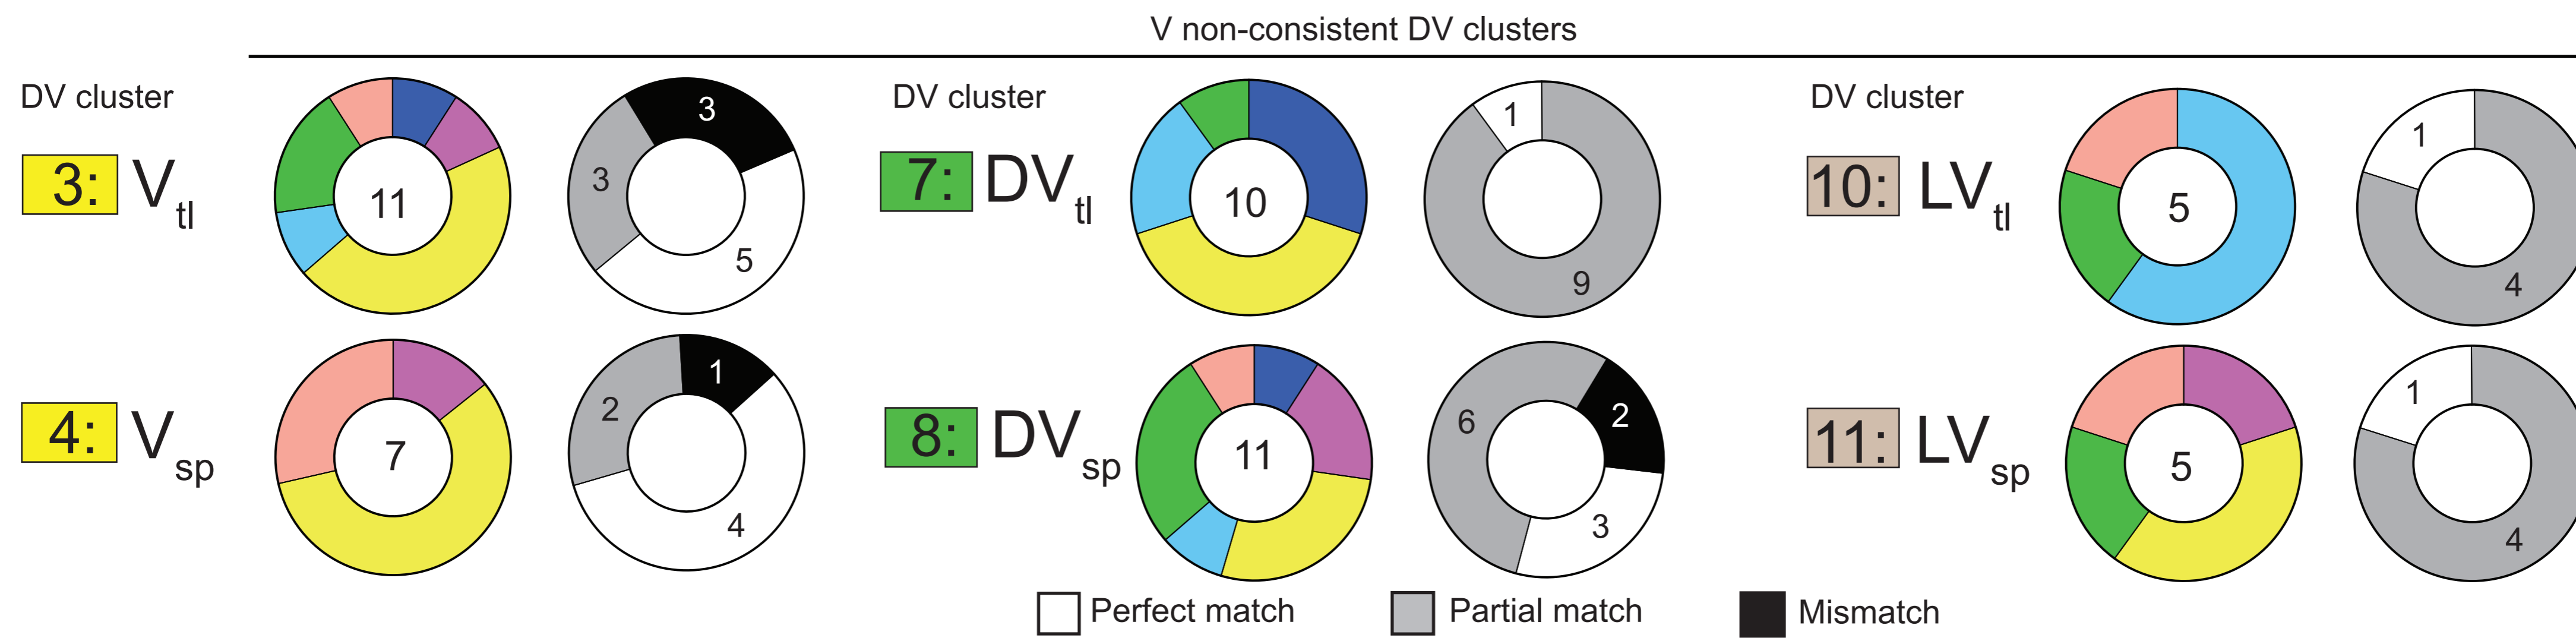

Supplement: supp [file elife_poa_e99263_Figure_4_figure_supplement_1.pdf › elife_poa_e99263_Figure_4_figure_supplement_1.pdf]

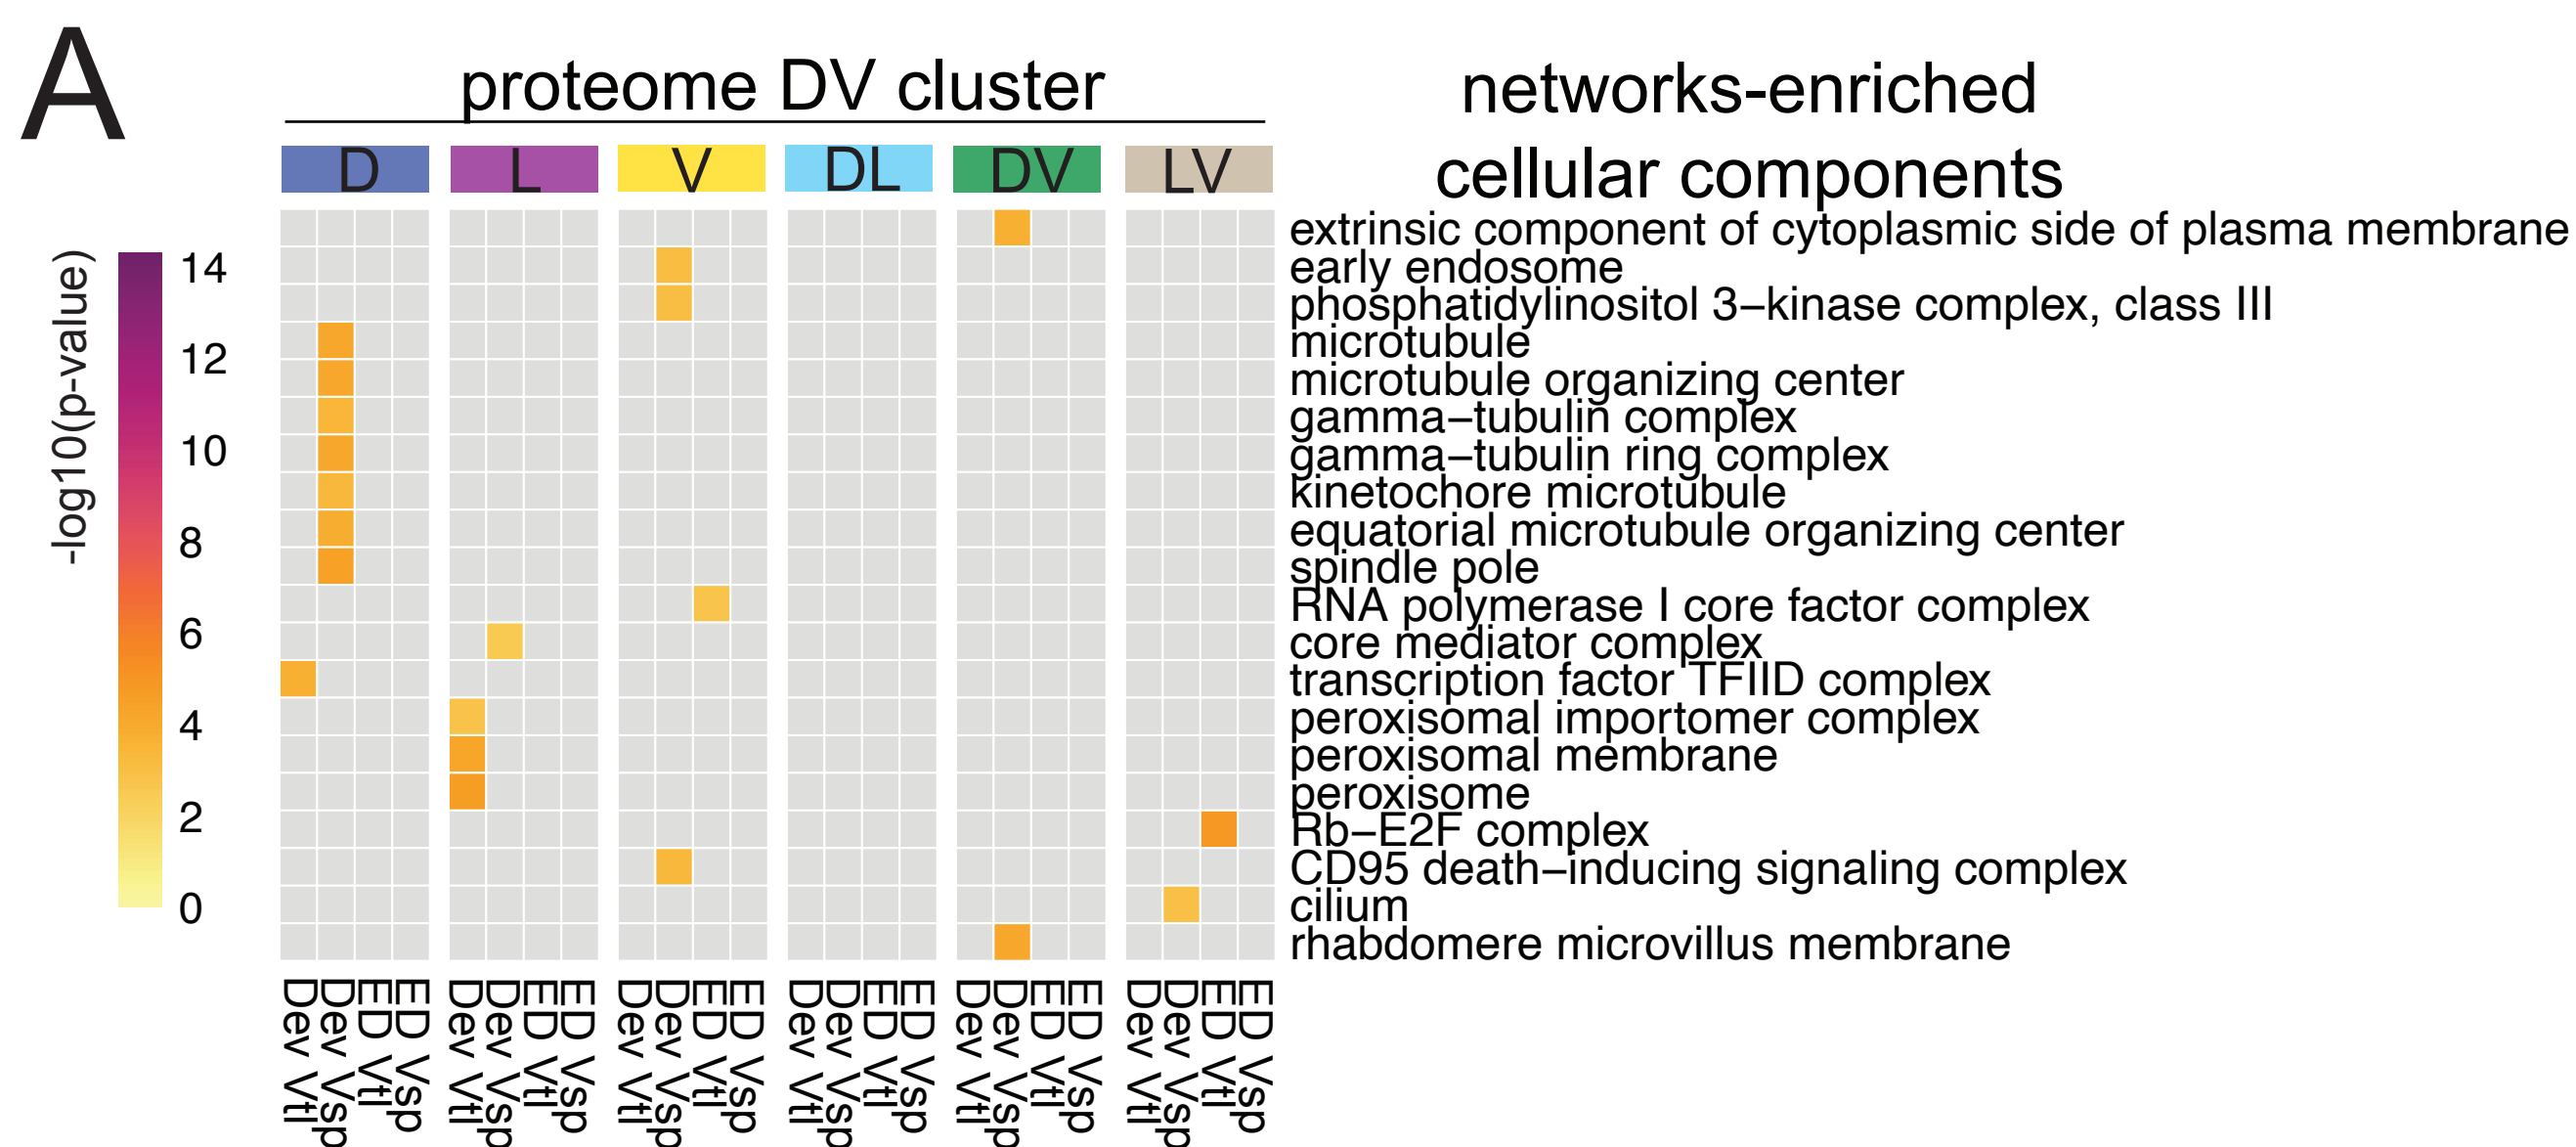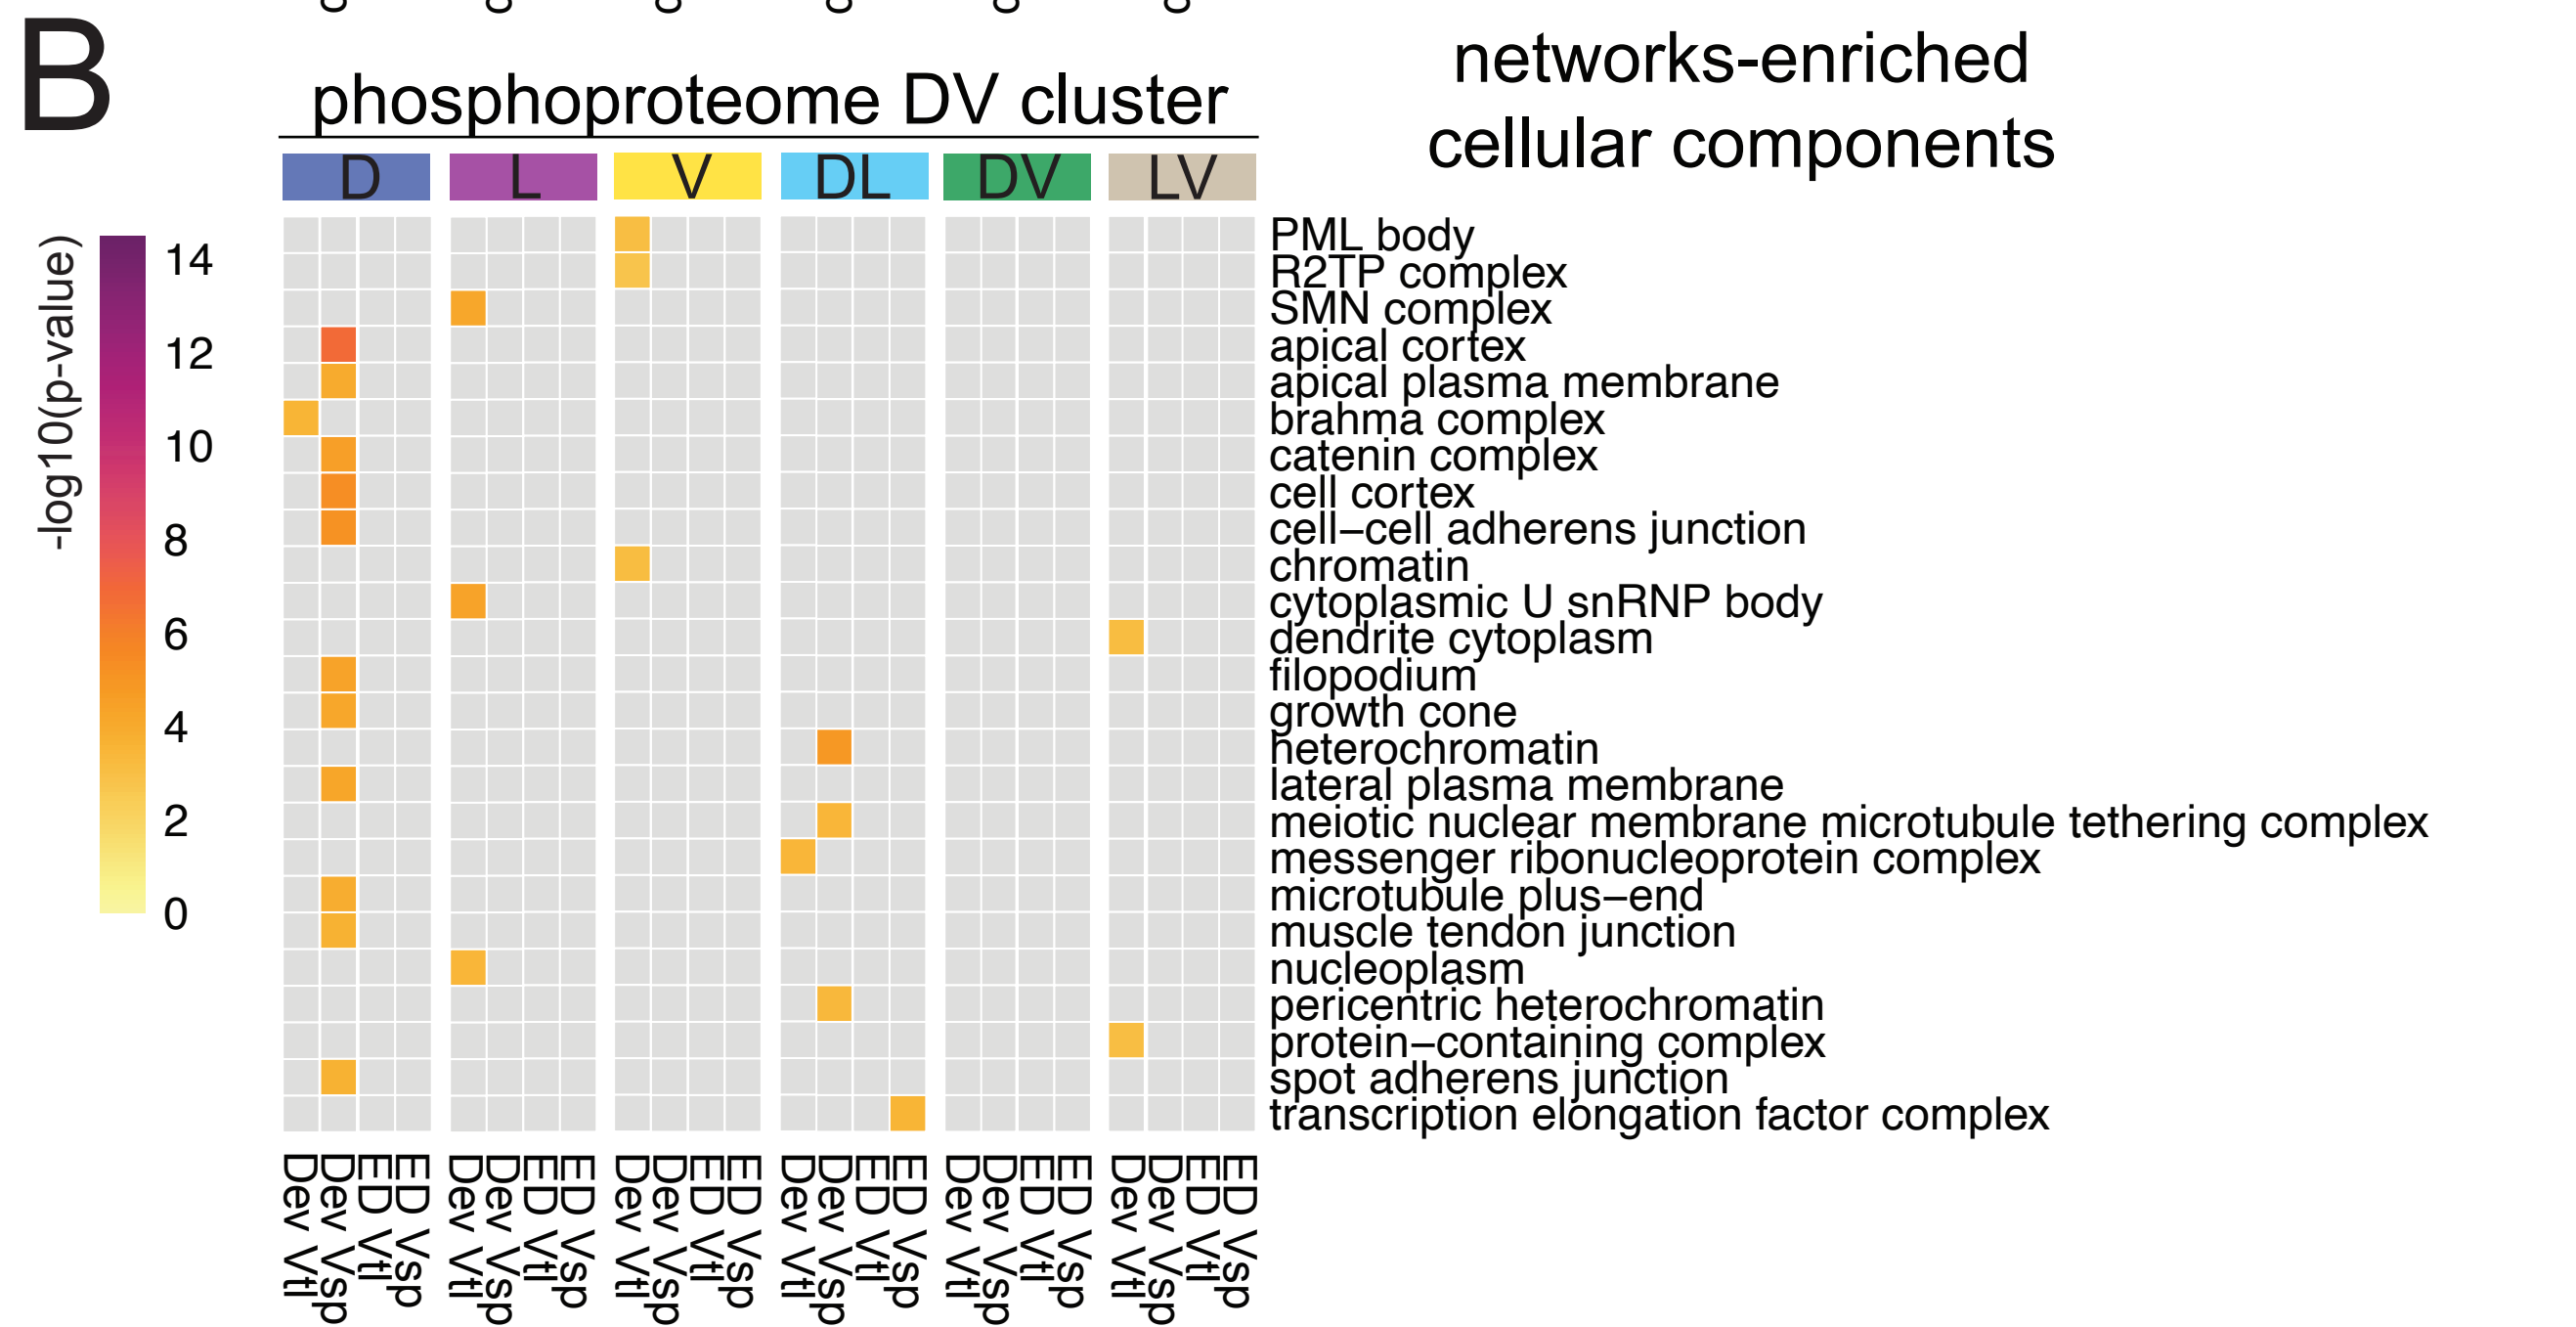

Supplement: supp [file elife_poa_e99263_Figure_6_figure_supplement_1.pdf › elife_poa_e99263_Figure_6_figure_supplement_1.pdf]

A

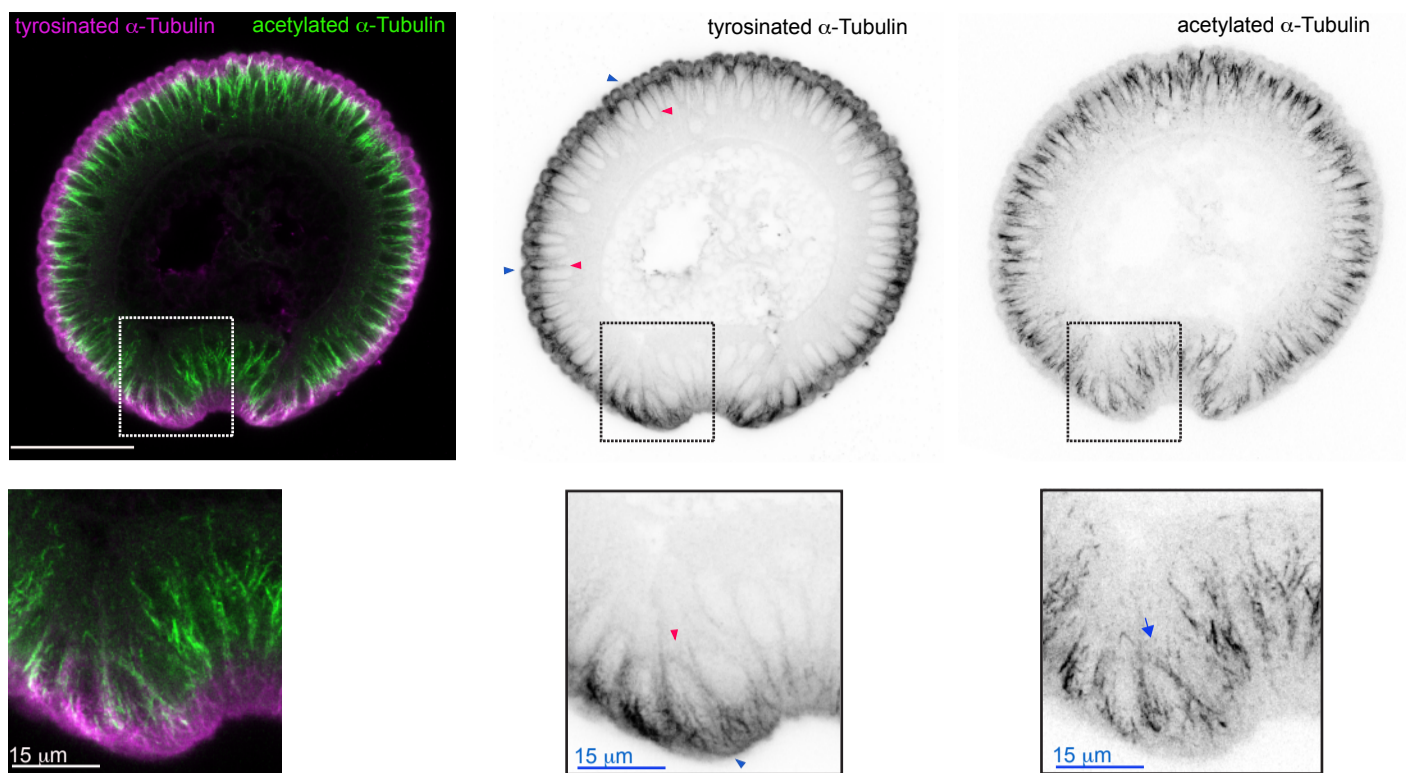

B

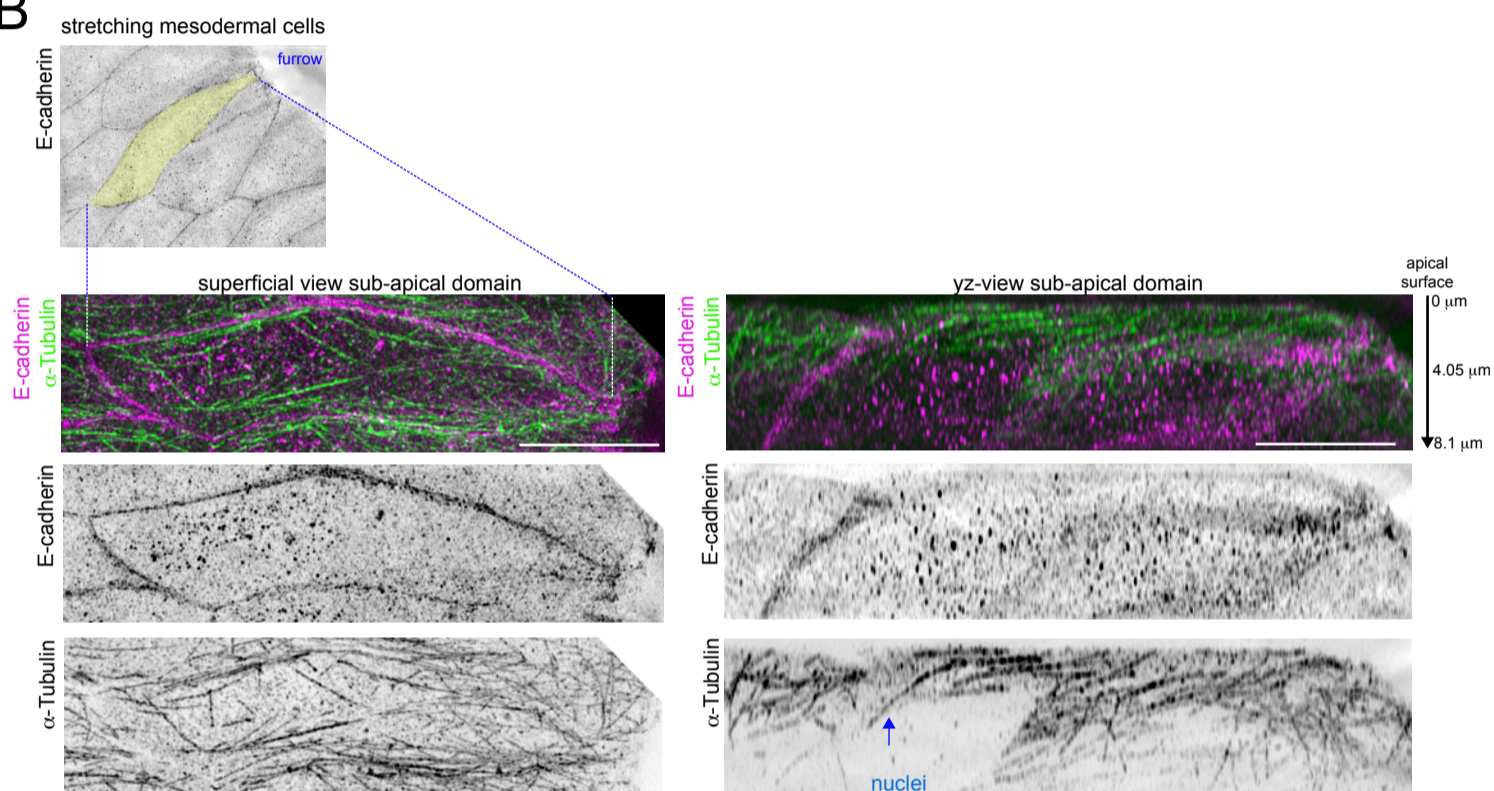

C

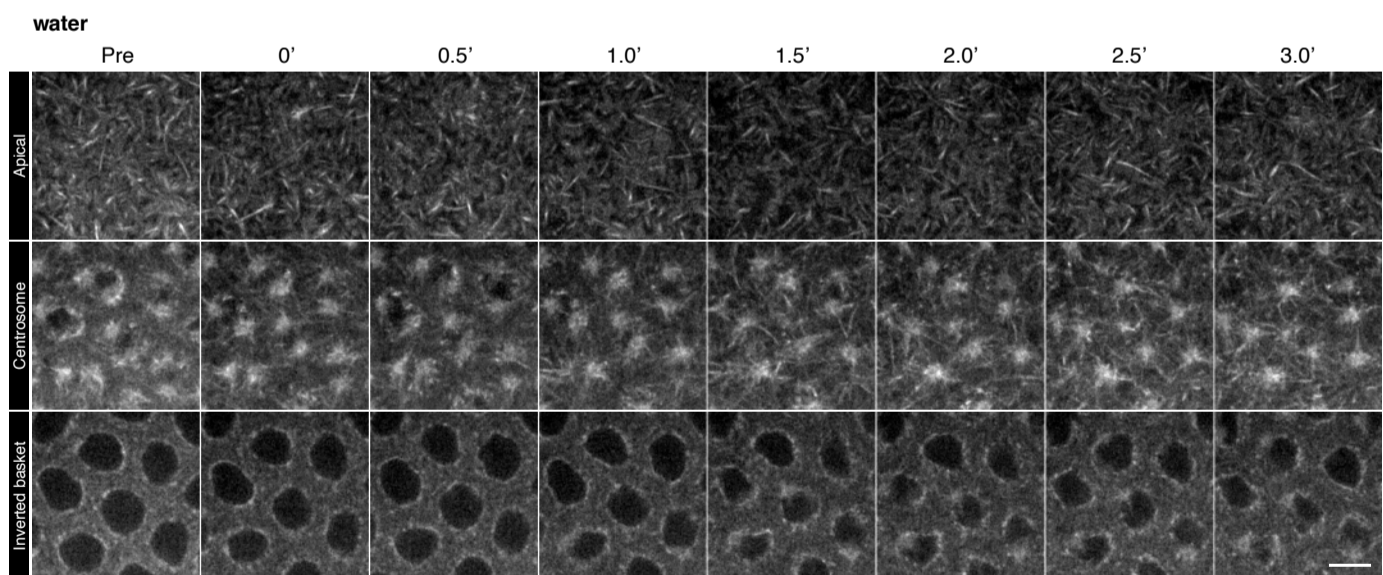

D

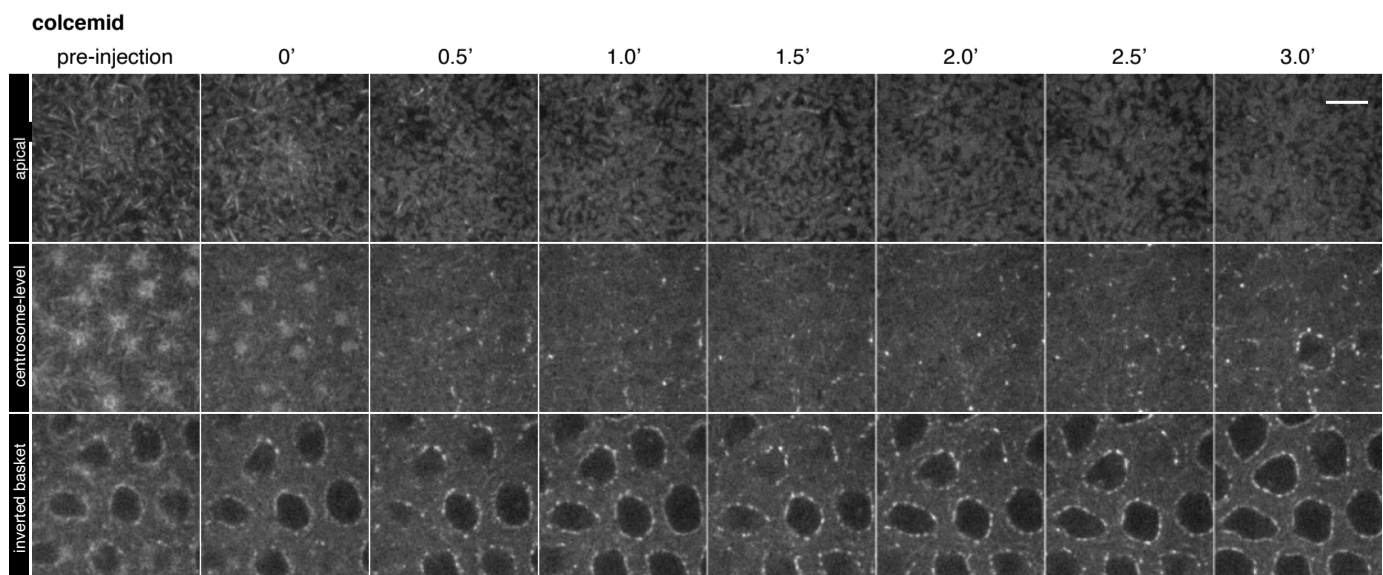

Supplement: supp [file elife_poa_e99263_Figure_7_figure_supplement_1.pdf › elife_poa_e99263_Figure_7_figure_supplement_1.pdf]
